# Supplementary material for: Microtubules regulate pancreatic β-cell heterogeneity via spatiotemporal control of insulin secretion hot spots
Source: eLife. 2021 Nov 16;10:e59912. doi: 10.7554/eLife.59912 (PMC8635970; doi:10.7554/eLife.59912)
Supplement: Figure 1—source data 1. — Each data set is a separate sheet. [file elife-59912-fig1-data1.xlsx]

## Sheet: Figure 1G,H
			Low Glucose						High Glucose
Date Imaged	Image	Cell #	Average Intensity- Glu-tubulin	Background Average Intensity- Glu-tubulin	Average Intensity with background subtracted- Glu-tubulin	Date Imaged	Image	Cell #	Average Intensity- Glu-tubulin	Background Average Intensity- Glu-tubulin	Average Intensity with background subtracted- Glu-tubulin
2020-02-03	DI Islets Low glucose Glu_tub-Apl-Tub	1	656.392	128.531	527.861	2020-02-18	DI Islets Low glucose Glu_tub-Apl-Tubulin	1	1206.59	38.758	1167.83
	DI Islets Low glucose Glu_tub-Apl-Tub001	1	1364.46	44.278	1320.18		DI Islets Low glucose Glu_tub-Apl-Tubulin001	1	852.795	452.15	400.645
	DI Islets Low glucose Glu_tub-Apl-Tub001	2	1228.95	44.278	1184.68		DI Islets Low glucose Glu_tub-Apl-Tubulin001	2	937.075	452.15	484.925
	DI Islets Low glucose Glu_tub-Apl-Tub002	1	911.733	37.102	874.631		DI Islets Low glucose Glu_tub-Apl-Tubulin002	1	522.86	45.01	477.85
	DI Islets Low glucose Glu_tub-Apl-Tub004	1	2012.94	86.18	1926.76		DI Islets Low glucose Glu_tub-Apl-Tubulin002	2	261.502	45.01	216.493
	DI Islets Low glucose Glu_tub-Apl-Tub004	2	643.229	86.18	557.049		DI Islets Low glucose Glu_tub-Apl-Tubulin004	1	803.788	169.724	634.064
	DI Islets Low glucose Glu_tub-Apl-Tub005	1	2017.61	53.844	1963.77		DI Islets Low glucose Glu_tub-Apl-Tubulin004	2	777.553	169.724	607.829
	DI Islets Low glucose Glu_tub-Apl-Tub005	2	1768.76	53.844	1714.92		DI Islets Low glucose Glu_tub-Apl-Tubulin004	3	580.824	169.724	411.1
	DI Islets Low glucose Glu_tub-Apl-Tub006	1	1724.97	36.77	1688.2		DI Islets Low glucose Glu_tub-Apl-Tubulin005	1	83.8297	36.572	47.2577
	DI Islets Low glucose Glu_tub-Apl-Tub007	1	787.025	39.045	747.98		DI Islets Low glucose Glu_tub-Apl-Tubulin005	2	91.6245	36.572	55.0525
	DI Islets Low glucose Glu_tub-Apl-Tub008	2	1413.47	49.668	1363.8		DI Islets Low glucose Glu_tub-Apl-Tubulin006	1	821.334	307.432	513.902
	DI Islets Low glucose Glu_tub-Apl-Tub009	1	1586.32	39.77	1546.55		DI Islets Low glucose Glu_tub-Apl-Tubulin006	2	592.597	307.432	285.165
2020-02-18	DI Islets Low glucose Glu_tub-Apl-Tubulin	1	993.83	78.876	914.954		DI Islets Low glucose Glu_tub-Apl-Tubulin006	3	894.014	307.432	586.582
	DI Islets Low glucose Glu_tub-Apl-Tubulin001	1	1025.53	63.778	961.75		DI Islets Low glucose Glu_tub-Apl-Tubulin007	1	914.336	511.275	403.061
	DI Islets Low glucose Glu_tub-Apl-Tubulin002	1	654.965	40.76	614.205		DI Islets Low glucose Glu_tub-Apl-Tubulin007	2	1316.02	511.275	804.741
	DI Islets Low glucose Glu_tub-Apl-Tubulin003	1	1589.12	65.264	1523.86		DI Islets Low glucose Glu_tub-Apl-Tubulin008	1	363.923	37.816	326.106
	DI Islets Low glucose Glu_tub-Apl-Tubulin006	1	329.158	39.399	289.759		DI Islets Low glucose Glu_tub-Apl-Tubulin008	2	498.939	37.816	461.123
	DI Islets Low glucose Glu_tub-Apl-Tubulin006	2	315.63	39.399	276.231		DI Islets Low glucose Glu_tub-Apl-Tubulin009	1	385.001	111.688	273.313
	DI Islets Low glucose Glu_tub-Apl-Tubulin007	1	1128.62	43.262	1085.35		DI Islets Low glucose Glu_tub-Apl-Tubulin009	2	450.058	111.688	338.37
	DI Islets Low glucose Glu_tub-Apl-Tubulin007	2	886.996	43.262	843.734		DI Islets Low glucose Glu_tub-Apl-Tubulin009	3	459.017	111.688	347.329
	DI Islets Low glucose Glu_tub-Apl-Tubulin008	1	554.5	37.352	517.148		DI Islets Low glucose Glu_tub-Apl-Tubulin010	2	388.015	45.559	342.456
	DI Islets Low glucose Glu_tub-Apl-Tubulin008	2	226.823	37.797	189.026		DI Islets Low glucose Glu_tub-Apl-Tubulin010	3	535.019	45.559	489.46
	DI Islets Low glucose Glu_tub-Apl-Tubulin009	1	1125.42	70.1	1055.32		DI Islets Low glucose Glu_tub-Apl-Tubulin010	4	567.308	45.559	521.749
	DI Islets Low glucose Glu_tub-Apl-Tubulin010	1	975.674	99.301	876.373		DI Islets Low glucose Glu_tub-Apl-Tubulin010	5	503.188	45.559	457.629
	DI Islets Low glucose Glu_tub-Apl-Tubulin010	2	1214.27	99.301	1114.97		DI Islets Low glucose Glu_tub-Apl-Tubulin010	6	438.211	45.559	392.652
	DI Islets Low glucose Glu_tub-Apl-Tubulin010	3	1378.45	99.301	1279.15		DI Islets Low glucose Glu_tub-Apl-Tubulin010	7	516.234	45.559	470.675
	DI Islets Low glucose Glu_tub-Apl-Tubulin011	1	1127.78	105.718	1022.06		DI Islets Low glucose Glu_tub-Apl-Tubulin011	1	280.213	66.096	214.117
	DI Islets Low glucose Glu_tub-Apl-Tubulin011	2	1009.68	105.718	903.965		DI Islets Low glucose Glu_tub-Apl-Tubulin011	2	441.679	66.096	375.583
	DI Islets Low glucose Glu_tub-Apl-Tubulin011	3	1339.72	105.718	1234		DI Islets Low glucose Glu_tub-Apl-Tubulin012	1	662.341	170.808	491.533
	DI Islets Low glucose Glu_tub-Apl-Tubulin012	1	1301.12	39.573	1261.54		DI Islets Low glucose Glu_tub-Apl-Tubulin012	2	720.634	170.808	549.826
	DI Islets Low glucose Glu_tub-Apl-Tubulin012	2	1426.66	39.573	1387.09		DI Islets Low glucose Glu_tub-Apl-Tubulin013	1	259.539	40.446	219.093
	DI Islets Low glucose Glu_tub-Apl-Tubulin012	3	1351.13	39.573	1311.55		DI Islets Low glucose Glu_tub-Apl-Tubulin013	2	349.913	40.446	309.466
	DI Islets Low glucose Glu_tub-Apl-Tubulin012	4	1358.27	39.573	1318.7		DI Islets Low glucose Glu_tub-Apl-Tubulin013	3	334.871	40.446	294.425
	DI Islets Low glucose Glu_tub-Apl-Tubulin013	1	617.725	55.223	562.502		DI Islets Low glucose Glu_tub-Apl-Tubulin014	1	511.772	51.376	460.396
	DI Islets Low glucose Glu_tub-Apl-Tubulin013	2	649.477	55.223	594.254		DI Islets Low glucose Glu_tub-Apl-Tubulin014	2	481.93	51.376	430.554
	DI Islets Low glucose Glu_tub-Apl-Tubulin013	3	729.228	55.223	674.005		DI Islets Low glucose Glu_tub-Apl-Tubulin015	2	960.719	116.647	844.072
	DI Islets Low glucose Glu_tub-Apl-Tubulin014	1	963.344	49.907	913.437		DI Islets Low glucose Glu_tub-Apl-Tubulin016	1	222.508	38.386	184.122
	DI Islets Low glucose Glu_tub-Apl-Tubulin015	1	902.597	36.656	865.941		DI Islets Low glucose Glu_tub-Apl-Tubulin016	3	349.192	38.386	310.806
	DI Islets Low glucose Glu_tub-Apl-Tubulin016	1	726.109	46.36	679.749		DI Islets Low glucose Glu_tub-Apl-Tubulin017	2	886.379	39.991	846.388
	DI Islets Low glucose Glu_tub-Apl-Tubulin016	2	420.052	46.36	373.692		DI Islets Low glucose Glu_tub-Apl-Tubulin017	3	385.563	39.991	345.572
	DI Islets Low glucose Glu_tub-Apl-Tubulin017	1	929.918	46.405	883.513		DI Islets Low glucose Glu_tub-Apl-Tubulin018	1	762.841	188.262	574.58
	DI Islets Low glucose Glu_tub-Apl-Tubulin017	2	656.19	46.405	609.785		DI Islets Low glucose Glu_tub-Apl-Tubulin019	1	474.142	52.3	421.842
	DI Islets Low glucose Glu_tub-Apl-Tubulin018	1	1555.59	469.391	1086.2		DI Islets Low glucose Glu_tub-Apl-Tubulin019	2	392.243	52.3	339.943
	DI Islets Low glucose Glu_tub-Apl-Tubulin018	2	1845.52	469.391	1376.12	2020-01-23	DI Islets Low glucose Glu_tub-Apl-Tubulin	1	475.337	53.08	422.257
	DI Islets Low glucose Glu_tub-Apl-Tubulin018	3	1814.53	469.391	1345.14		DI Islets Low glucose Glu_tub-Apl-Tubulin	2	205.846	53.08	152.766
	DI Islets Low glucose Glu_tub-Apl-Tubulin018	4	1488.69	469.391	1019.3		DI Islets Low glucose Glu_tub-Apl-Tubulin	3	707.626	53.08	654.546
	DI Islets Low glucose Glu_tub-Apl-Tubulin018	5	1113.82	469.391	644.429		DI Islets Low glucose Glu_tub-Apl-Tubulin	4	251.079	53.08	197.999
	DI Islets Low glucose Glu_tub-Apl-Tubulin018	6	531.351	469.391	61.96		DI Islets Low glucose Glu_tub-Apl-Tubulin001	1	683.612	59.524	624.088
	DI Islets Low glucose Glu_tub-Apl-Tubulin018	7	500.877	469.391	31.486		DI Islets Low glucose Glu_tub-Apl-Tubulin001	2	330.646	59.524	271.122
	DI Islets Low glucose Glu_tub-Apl-Tubulin019	1	759.655	61.595	698.06		DI Islets Low glucose Glu_tub-Apl-Tubulin002	1	194.497	58.748	135.749
	DI Islets Low glucose Glu_tub-Apl-Tubulin	2	875.819	61.595	814.224		DI Islets Low glucose Glu_tub-Apl-Tubulin002	2	148.753	58.748	90.005
2020-02-21	DI Islets Low glucose Glu_tub-Apl-Tubulin	1	615.088	38.08	577.008		DI Islets Low glucose Glu_tub-Apl-Tubulin002	3	208.009	58.748	149.261
	DI Islets Low glucose Glu_tub-Apl-Tubulin	2	661.559	38.08	623.479		DI Islets Low glucose Glu_tub-Apl-Tubulin003	1	238.856	52.408	186.448
	DI Islets Low glucose Glu_tub-Apl-Tubulin001	1	643.478	39.315	604.163		DI Islets Low glucose Glu_tub-Apl-Tubulin003	2	271.257	52.408	218.849
	DI Islets Low glucose Glu_tub-Apl-Tubulin001	2	190.346	39.315	151.031		DI Islets Low glucose Glu_tub-Apl-Tubulin004	1	434.823	53.038	381.785
	DI Islets Low glucose Glu_tub-Apl-Tubulin002	1	803.79	37	766.79		DI Islets Low glucose Glu_tub-Apl-Tubulin004	3	547.884	53.038	494.846
	DI Islets Low glucose Glu_tub-Apl-Tubulin003	1	522.775	23.064	499.711		DI Islets Low glucose Glu_tub-Apl-Tubulin004	3	88.943	53.038	35.905
	DI Islets Low glucose Glu_tub-Apl-Tubulin004	1	682.405	36.599	645.806		DI Islets Low glucose Glu_tub-Apl-Tubulin004	4	83.908	53.038	30.87
	DI Islets Low glucose Glu_tub-Apl-Tubulin004	2	999.525	36.599	962.926		DI Islets Low glucose Glu_tub-Apl-Tubulin005	1	526.808	65.167	461.641
	DI Islets Low glucose Glu_tub-Apl-Tubulin004	3	733.595	36.599	696.996		DI Islets Low glucose Glu_tub-Apl-Tubulin005	2	559.425	65.167	494.258
	DI Islets Low glucose Glu_tub-Apl-Tubulin005	1	990.04	37.59	952.45		DI Islets Low glucose Glu_tub-Apl-Tubulin005	3	123.295	65.167	58.128
	DI Islets Low glucose Glu_tub-Apl-Tubulin005	2	933.785	37.59	896.195		DI Islets Low glucose Glu_tub-Apl-Tubulin006	1	233.078	48.962	184.116
	DI Islets Low glucose Glu_tub-Apl-Tubulin006	1	1042.62	42.103	1000.52		DI Islets Low glucose Glu_tub-Apl-Tubulin006	2	246.056	48.962	197.094
	DI Islets Low glucose Glu_tub-Apl-Tubulin006	2	1252.04	42.103	1209.94		DI Islets Low glucose Glu_tub-Apl-Tubulin007	1	135.293	57.177	78.116
	DI Islets Low glucose Glu_tub-Apl-Tubulin007	1	375.62	36.755	338.865		DI Islets Low glucose Glu_tub-Apl-Tubulin007	2	109.047	57.177	51.87
	DI Islets Low glucose Glu_tub-Apl-Tubulin008	1	963.93	39.427	924.503		DI Islets Low glucose Glu_tub-Apl-Tubulin007	3	118.972	57.177	61.795
	DI Islets Low glucose Glu_tub-Apl-Tubulin008	2	835.735	39.427	796.308		DI Islets Low glucose Glu_tub-Apl-Tubulin007	4	121.773	57.177	64.596
	DI Islets Low glucose Glu_tub-Apl-Tubulin009	1	1453.7	38.898	1414.8		DI Islets Low glucose Glu_tub-Apl-Tubulin008	1	602.69	59.175	543.515
	DI Islets Low glucose Glu_tub-Apl-Tubulin009	2	1030.39	38.898	991.497		DI Islets Low glucose Glu_tub-Apl-Tubulin008	3	644.254	59.175	585.079
	DI Islets Low glucose Glu_tub-Apl-Tubulin011	1	247.138	37.1	210.038		DI Islets Low glucose Glu_tub-Apl-Tubulin009	1	1354.31	161.13	1193.18
	DI Islets Low glucose Glu_tub-Apl-Tubulin011	2	242.043	37.1	204.943		DI Islets Low glucose Glu_tub-Apl-Tubulin009	2	440.838	161.13	279.708
	DI Islets Low glucose Glu_tub-Apl-Tubulin011	3	272.766	37.1	235.666		DI Islets Low glucose Glu_tub-Apl-Tubulin010	1	344.316	36.885	307.431
	DI Islets Low glucose Glu_tub-Apl-Tubulin012	1	903.08	36.951	866.129		DI Islets Low glucose Glu_tub-Apl-Tubulin011	1	259.972	37.307	222.665
	DI Islets Low glucose Glu_tub-Apl-Tubulin012	2	721.875	36.951	684.924		DI Islets Low glucose Glu_tub-Apl-Tubulin011	2	130.55	37.307	93.243
	DI Islets Low glucose Glu_tub-Apl-Tubulin013	1	766.48	37.803	728.677	2020-03-02	DI Islets Low glucose Glu_tub-Apl-Tubulin	1	313.719	37.52	276.199
	DI Islets Low glucose Glu_tub-Apl-Tubulin014	1	1166.48	37.015	1129.46		DI Islets Low glucose Glu_tub-Apl-Tubulin	2	233.733	37.52	196.213
	DI Islets Low glucose Glu_tub-Apl-Tubulin014	2	512.99	37.015	475.975		DI Islets Low glucose Glu_tub-Apl-Tubulin001	1	205.15	39.241	165.909
	DI Islets Low glucose Glu_tub-Apl-Tubulin014	3	556.75	37.015	519.735		DI Islets Low glucose Glu_tub-Apl-Tubulin001	2	147.495	39.241	108.254
	DI Islets Low glucose Glu_tub-Apl-Tubulin015	1	938.56	37.607	900.953		DI Islets Low glucose Glu_tub-Apl-Tubulin001	3	168.601	39.241	129.361
	DI Islets Low glucose Glu_tub-Apl-Tubulin016	1	219.47	43.373	176.097		DI Islets Low glucose Glu_tub-Apl-Tubulin001	4	182.345	39.241	143.103
	DI Islets Low glucose Glu_tub-Apl-Tubulin016	2	183.361	43.373	139.988		DI Islets Low glucose Glu_tub-Apl-Tubulin002	1	688.215	36.612	651.603
	DI Islets Low glucose Glu_tub-Apl-Tubulin016	3	197.605	43.373	154.232		DI Islets Low glucose Glu_tub-Apl-Tubulin002	2	634.767	36.612	598.155
	DI Islets Low glucose Glu_tub-Apl-Tubulin017	1	389.598	39.361	350.237		DI Islets Low glucose Glu_tub-Apl-Tubulin002	3	119.511	36.612	82.899
	DI Islets Low glucose Glu_tub-Apl-Tubulin017	2	308.486	39.361	269.125		DI Islets Low glucose Glu_tub-Apl-Tubulin003	1	172.054	40.15	131.904
	DI Islets Low glucose Glu_tub-Apl-Tubulin018	1	1473.79	37.39	1436.39		DI Islets Low glucose Glu_tub-Apl-Tubulin003	2	158.692	40.15	118.542
	DI Islets Low glucose Glu_tub-Apl-Tubulin018	2	1164.72	37.39	1127.33		DI Islets Low glucose Glu_tub-Apl-Tubulin004	1	364.254	39.837	324.417
	DI Islets Low glucose Glu_tub-Apl-Tubulin019	1	1518.31	38.477	1479.83		DI Islets Low glucose Glu_tub-Apl-Tubulin004	2	528.837	39.837	489
	DI Islets Low glucose Glu_tub-Apl-Tubulin019	2	988.935	38.477	950.458		DI Islets Low glucose Glu_tub-Apl-Tubulin005	1	364.254	37.334	326.92
	DI Islets Low glucose Glu_tub-Apl-Tubulin019	3	1623.08	38.477	1584.6		DI Islets Low glucose Glu_tub-Apl-Tubulin005	2	528.837	37.334	491.503
	DI Islets Low glucose Glu_tub-Apl-Tubulin020	1	2673.77	37.189	2636.58		DI Islets Low glucose Glu_tub-Apl-Tubulin005	3	550.095	37.334	512.761
	DI Islets Low glucose Glu_tub-Apl-Tubulin021	1	1230.26	41.136	1189.13		DI Islets Low glucose Glu_tub-Apl-Tubulin006	1	753.126	39.134	713.992
	DI Islets Low glucose Glu_tub-Apl-Tubulin021	2	1395.21	41.136	1354.07		DI Islets Low glucose Glu_tub-Apl-Tubulin006	2	882.441	39.134	843.307
	DI Islets Low glucose Glu_tub-Apl-Tubulin021	3	1100.88	41.136	1059.75		DI Islets Low glucose Glu_tub-Apl-Tubulin006	3	707.757	39.134	668.623
	DI Islets Low glucose Glu_tub-Apl-Tubulin024	1	776.82	38.212	738.608		DI Islets Low glucose Glu_tub-Apl-Tubulin007	1	185.09	40.497	144.593
	DI Islets Low glucose Glu_tub-Apl-Tubulin024	2	750.795	38.212	712.583		DI Islets Low glucose Glu_tub-Apl-Tubulin007	2	139.478	40.497	98.9813
	DI Islets Low glucose Glu_tub-Apl-Tubulin026	1	625.565	41.078	584.487		DI Islets Low glucose Glu_tub-Apl-Tubulin008	1	460.632	38.913	421.719
	DI Islets Low glucose Glu_tub-Apl-Tubulin027	1	355.275	37.011	318.264		DI Islets Low glucose Glu_tub-Apl-Tubulin008	2	331.869	38.913	292.956
	DI Islets Low glucose Glu_tub-Apl-Tubulin028	1	847.755	38.096	809.659		DI Islets Low glucose Glu_tub-Apl-Tubulin009	1	441.063	37.116	403.947
	DI Islets Low glucose Glu_tub-Apl-Tubulin030	1	744.12	37.841	706.279		DI Islets Low glucose Glu_tub-Apl-Tubulin009	2	737.511	37.116	700.395
	DI Islets Low glucose Glu_tub-Apl-Tubulin031	1	871.035	36.659	834.376		DI Islets Low glucose Glu_tub-Apl-Tubulin009	3	850.119	37.116	813.003
	DI Islets Low glucose Glu_tub-Apl-Tubulin031	2	723.195	36.659	686.536		DI Islets Low glucose Glu_tub-Apl-Tubulin009	4	710.73	37.116	673.614

## Sheet: Figure 1I
		Low Glucose				High Glucose
Date Imaged	Image	Cell #	Normalized to mean- Glu-tubulin	Date Imaged	Image	Cell #	Normalized to mean- Glu-tubulin
2020-02-03	DI Islets Low glucose Glu_tub-Apl-Tub	1	0.60626	2020-02-18	DI Islets Low glucose Glu_tub-Apl-Tubulin	1	3.08978
	DI Islets Low glucose Glu_tub-Apl-Tub001	1	1.51626		DI Islets Low glucose Glu_tub-Apl-Tubulin001	1	1.06001
	DI Islets Low glucose Glu_tub-Apl-Tub001	2	1.36063		DI Islets Low glucose Glu_tub-Apl-Tubulin001	2	1.28299
	DI Islets Low glucose Glu_tub-Apl-Tub002	1	1.00453		DI Islets Low glucose Glu_tub-Apl-Tubulin002	1	1.26427
	DI Islets Low glucose Glu_tub-Apl-Tub004	1	2.21293		DI Islets Low glucose Glu_tub-Apl-Tubulin002	2	0.572784
	DI Islets Low glucose Glu_tub-Apl-Tub004	2	0.639784		DI Islets Low glucose Glu_tub-Apl-Tubulin004	1	1.67757
	DI Islets Low glucose Glu_tub-Apl-Tub005	1	2.25543		DI Islets Low glucose Glu_tub-Apl-Tubulin004	2	1.60816
	DI Islets Low glucose Glu_tub-Apl-Tub005	2	1.96962		DI Islets Low glucose Glu_tub-Apl-Tubulin004	3	1.08767
	DI Islets Low glucose Glu_tub-Apl-Tub006	1	1.93894		DI Islets Low glucose Glu_tub-Apl-Tubulin005	1	0.125032
	DI Islets Low glucose Glu_tub-Apl-Tub007	1	0.859072		DI Islets Low glucose Glu_tub-Apl-Tubulin005	2	0.145655
	DI Islets Low glucose Glu_tub-Apl-Tub008	2	1.56635		DI Islets Low glucose Glu_tub-Apl-Tubulin006	1	1.35965
	DI Islets Low glucose Glu_tub-Apl-Tub009	1	1.77625		DI Islets Low glucose Glu_tub-Apl-Tubulin006	2	0.754474
2020-02-18	DI Islets Low glucose Glu_tub-Apl-Tubulin	1	1.05085		DI Islets Low glucose Glu_tub-Apl-Tubulin006	3	1.55195
	DI Islets Low glucose Glu_tub-Apl-Tubulin001	1	1.10459		DI Islets Low glucose Glu_tub-Apl-Tubulin007	1	1.0664
	DI Islets Low glucose Glu_tub-Apl-Tubulin002	1	0.705429		DI Islets Low glucose Glu_tub-Apl-Tubulin007	2	2.12914
	DI Islets Low glucose Glu_tub-Apl-Tubulin003	1	1.75019		DI Islets Low glucose Glu_tub-Apl-Tubulin008	1	0.862795
	DI Islets Low glucose Glu_tub-Apl-Tubulin006	1	0.332795		DI Islets Low glucose Glu_tub-Apl-Tubulin008	2	1.22001
	DI Islets Low glucose Glu_tub-Apl-Tubulin006	2	0.317258		DI Islets Low glucose Glu_tub-Apl-Tubulin009	1	0.723118
	DI Islets Low glucose Glu_tub-Apl-Tubulin007	1	1.24655		DI Islets Low glucose Glu_tub-Apl-Tubulin009	2	0.895241
	DI Islets Low glucose Glu_tub-Apl-Tubulin007	2	0.969048		DI Islets Low glucose Glu_tub-Apl-Tubulin009	3	0.918945
	DI Islets Low glucose Glu_tub-Apl-Tubulin008	1	0.593956		DI Islets Low glucose Glu_tub-Apl-Tubulin010	2	0.906051
	DI Islets Low glucose Glu_tub-Apl-Tubulin008	2	0.217101		DI Islets Low glucose Glu_tub-Apl-Tubulin010	3	1.29499
	DI Islets Low glucose Glu_tub-Apl-Tubulin009	1	1.21206		DI Islets Low glucose Glu_tub-Apl-Tubulin010	4	1.38042
	DI Islets Low glucose Glu_tub-Apl-Tubulin010	1	1.00653		DI Islets Low glucose Glu_tub-Apl-Tubulin010	5	1.21077
	DI Islets Low glucose Glu_tub-Apl-Tubulin010	2	1.28056		DI Islets Low glucose Glu_tub-Apl-Tubulin010	6	1.03886
	DI Islets Low glucose Glu_tub-Apl-Tubulin010	3	1.46913		DI Islets Low glucose Glu_tub-Apl-Tubulin010	7	1.24529
	DI Islets Low glucose Glu_tub-Apl-Tubulin011	1	1.17386		DI Islets Low glucose Glu_tub-Apl-Tubulin011	1	0.566499
	DI Islets Low glucose Glu_tub-Apl-Tubulin011	2	1.03822		DI Islets Low glucose Glu_tub-Apl-Tubulin011	2	0.993699
	DI Islets Low glucose Glu_tub-Apl-Tubulin011	3	1.41728		DI Islets Low glucose Glu_tub-Apl-Tubulin012	1	1.30047
	DI Islets Low glucose Glu_tub-Apl-Tubulin012	1	1.44891		DI Islets Low glucose Glu_tub-Apl-Tubulin012	2	1.4547
	DI Islets Low glucose Glu_tub-Apl-Tubulin012	2	1.5931		DI Islets Low glucose Glu_tub-Apl-Tubulin013	1	0.579665
	DI Islets Low glucose Glu_tub-Apl-Tubulin012	3	1.50635		DI Islets Low glucose Glu_tub-Apl-Tubulin013	2	0.81877
	DI Islets Low glucose Glu_tub-Apl-Tubulin012	4	1.51456		DI Islets Low glucose Glu_tub-Apl-Tubulin013	3	0.778975
	DI Islets Low glucose Glu_tub-Apl-Tubulin013	1	0.646046		DI Islets Low glucose Glu_tub-Apl-Tubulin014	1	1.21809
	DI Islets Low glucose Glu_tub-Apl-Tubulin013	2	0.682514		DI Islets Low glucose Glu_tub-Apl-Tubulin014	2	1.13914
	DI Islets Low glucose Glu_tub-Apl-Tubulin013	3	0.77411		DI Islets Low glucose Glu_tub-Apl-Tubulin015	2	2.2332
	DI Islets Low glucose Glu_tub-Apl-Tubulin014	1	1.0491		DI Islets Low glucose Glu_tub-Apl-Tubulin016	1	0.48714
	DI Islets Low glucose Glu_tub-Apl-Tubulin015	1	0.994553		DI Islets Low glucose Glu_tub-Apl-Tubulin016	3	0.822315
	DI Islets Low glucose Glu_tub-Apl-Tubulin016	1	0.780707		DI Islets Low glucose Glu_tub-Apl-Tubulin017	2	2.23933
	DI Islets Low glucose Glu_tub-Apl-Tubulin016	2	0.429194		DI Islets Low glucose Glu_tub-Apl-Tubulin017	3	0.914296
	DI Islets Low glucose Glu_tub-Apl-Tubulin017	1	1.01473		DI Islets Low glucose Glu_tub-Apl-Tubulin018	1	1.52019
	DI Islets Low glucose Glu_tub-Apl-Tubulin017	2	0.700352		DI Islets Low glucose Glu_tub-Apl-Tubulin019	1	1.11609
	DI Islets Low glucose Glu_tub-Apl-Tubulin018	1	1.24752		DI Islets Low glucose Glu_tub-Apl-Tubulin019	2	0.899404
	DI Islets Low glucose Glu_tub-Apl-Tubulin018	2	1.58051	2020-01-23	DI Islets Low glucose Glu_tub-Apl-Tubulin	1	1.11719
	DI Islets Low glucose Glu_tub-Apl-Tubulin018	3	1.54492		DI Islets Low glucose Glu_tub-Apl-Tubulin	2	0.40418
	DI Islets Low glucose Glu_tub-Apl-Tubulin018	4	1.17069		DI Islets Low glucose Glu_tub-Apl-Tubulin	3	1.73176
	DI Islets Low glucose Glu_tub-Apl-Tubulin018	5	0.740141		DI Islets Low glucose Glu_tub-Apl-Tubulin	4	0.523855
	DI Islets Low glucose Glu_tub-Apl-Tubulin018	6	0.0711625		DI Islets Low glucose Glu_tub-Apl-Tubulin001	1	1.65118
	DI Islets Low glucose Glu_tub-Apl-Tubulin018	7	0.0361624		DI Islets Low glucose Glu_tub-Apl-Tubulin001	2	0.71732
	DI Islets Low glucose Glu_tub-Apl-Tubulin019	1	0.801738		DI Islets Low glucose Glu_tub-Apl-Tubulin002	1	0.359157
	DI Islets Low glucose Glu_tub-Apl-Tubulin	2	0.93515		DI Islets Low glucose Glu_tub-Apl-Tubulin002	2	0.23813
2020-02-21	DI Islets Low glucose Glu_tub-Apl-Tubulin	1	0.662707		DI Islets Low glucose Glu_tub-Apl-Tubulin002	3	0.394907
	DI Islets Low glucose Glu_tub-Apl-Tubulin	2	0.71608		DI Islets Low glucose Glu_tub-Apl-Tubulin003	1	0.493294
	DI Islets Low glucose Glu_tub-Apl-Tubulin001	1	0.693895		DI Islets Low glucose Glu_tub-Apl-Tubulin003	2	0.579019
	DI Islets Low glucose Glu_tub-Apl-Tubulin001	2	0.173463		DI Islets Low glucose Glu_tub-Apl-Tubulin004	1	1.01011
	DI Islets Low glucose Glu_tub-Apl-Tubulin002	1	0.880676		DI Islets Low glucose Glu_tub-Apl-Tubulin004	3	1.30924
	DI Islets Low glucose Glu_tub-Apl-Tubulin003	1	0.57393		DI Islets Low glucose Glu_tub-Apl-Tubulin004	3	0.0949955
	DI Islets Low glucose Glu_tub-Apl-Tubulin004	1	0.741723		DI Islets Low glucose Glu_tub-Apl-Tubulin004	4	0.0816742
	DI Islets Low glucose Glu_tub-Apl-Tubulin004	2	1.10594		DI Islets Low glucose Glu_tub-Apl-Tubulin005	1	1.22139
	DI Islets Low glucose Glu_tub-Apl-Tubulin004	3	0.800516		DI Islets Low glucose Glu_tub-Apl-Tubulin005	2	1.30768
	DI Islets Low glucose Glu_tub-Apl-Tubulin005	1	1.09391		DI Islets Low glucose Glu_tub-Apl-Tubulin005	3	0.153792
	DI Islets Low glucose Glu_tub-Apl-Tubulin005	2	1.0293		DI Islets Low glucose Glu_tub-Apl-Tubulin006	1	0.487124
	DI Islets Low glucose Glu_tub-Apl-Tubulin006	1	1.14912		DI Islets Low glucose Glu_tub-Apl-Tubulin006	2	0.521461
	DI Islets Low glucose Glu_tub-Apl-Tubulin006	2	1.38964		DI Islets Low glucose Glu_tub-Apl-Tubulin007	1	0.206675
	DI Islets Low glucose Glu_tub-Apl-Tubulin007	1	0.389194		DI Islets Low glucose Glu_tub-Apl-Tubulin007	2	0.137235
	DI Islets Low glucose Glu_tub-Apl-Tubulin008	1	1.06181		DI Islets Low glucose Glu_tub-Apl-Tubulin007	3	0.163494
	DI Islets Low glucose Glu_tub-Apl-Tubulin008	2	0.914578		DI Islets Low glucose Glu_tub-Apl-Tubulin007	4	0.170905
	DI Islets Low glucose Glu_tub-Apl-Tubulin009	1	1.62493		DI Islets Low glucose Glu_tub-Apl-Tubulin008	1	1.438
	DI Islets Low glucose Glu_tub-Apl-Tubulin009	2	1.13876		DI Islets Low glucose Glu_tub-Apl-Tubulin008	3	1.54797
	DI Islets Low glucose Glu_tub-Apl-Tubulin011	1	0.241233		DI Islets Low glucose Glu_tub-Apl-Tubulin009	1	3.15684
	DI Islets Low glucose Glu_tub-Apl-Tubulin011	2	0.235382		DI Islets Low glucose Glu_tub-Apl-Tubulin009	2	0.740037
	DI Islets Low glucose Glu_tub-Apl-Tubulin011	3	0.270668		DI Islets Low glucose Glu_tub-Apl-Tubulin010	1	0.813385
	DI Islets Low glucose Glu_tub-Apl-Tubulin012	1	0.994769		DI Islets Low glucose Glu_tub-Apl-Tubulin011	1	0.589115
	DI Islets Low glucose Glu_tub-Apl-Tubulin012	2	0.786651		DI Islets Low glucose Glu_tub-Apl-Tubulin011	2	0.246697
	DI Islets Low glucose Glu_tub-Apl-Tubulin013	1	0.836902	2020-03-02	DI Islets Low glucose Glu_tub-Apl-Tubulin	1	0.730753
	DI Islets Low glucose Glu_tub-Apl-Tubulin014	1	1.29722		DI Islets Low glucose Glu_tub-Apl-Tubulin	2	0.51913
	DI Islets Low glucose Glu_tub-Apl-Tubulin014	2	0.546668		DI Islets Low glucose Glu_tub-Apl-Tubulin001	1	0.438953
	DI Islets Low glucose Glu_tub-Apl-Tubulin014	3	0.596928		DI Islets Low glucose Glu_tub-Apl-Tubulin001	2	0.286413
	DI Islets Low glucose Glu_tub-Apl-Tubulin015	1	1.03477		DI Islets Low glucose Glu_tub-Apl-Tubulin001	3	0.342255
	DI Islets Low glucose Glu_tub-Apl-Tubulin016	1	0.202251		DI Islets Low glucose Glu_tub-Apl-Tubulin001	4	0.378616
	DI Islets Low glucose Glu_tub-Apl-Tubulin016	2	0.160779		DI Islets Low glucose Glu_tub-Apl-Tubulin002	1	1.72398
	DI Islets Low glucose Glu_tub-Apl-Tubulin016	3	0.177139		DI Islets Low glucose Glu_tub-Apl-Tubulin002	2	1.58257
	DI Islets Low glucose Glu_tub-Apl-Tubulin017	1	0.402255		DI Islets Low glucose Glu_tub-Apl-Tubulin002	3	0.21933
	DI Islets Low glucose Glu_tub-Apl-Tubulin017	2	0.309096		DI Islets Low glucose Glu_tub-Apl-Tubulin003	1	0.348984
	DI Islets Low glucose Glu_tub-Apl-Tubulin018	1	1.64973		DI Islets Low glucose Glu_tub-Apl-Tubulin003	2	0.313631
	DI Islets Low glucose Glu_tub-Apl-Tubulin018	2	1.29477		DI Islets Low glucose Glu_tub-Apl-Tubulin004	1	0.858325
	DI Islets Low glucose Glu_tub-Apl-Tubulin019	1	1.69962		DI Islets Low glucose Glu_tub-Apl-Tubulin004	2	1.29377
	DI Islets Low glucose Glu_tub-Apl-Tubulin019	2	1.09162		DI Islets Low glucose Glu_tub-Apl-Tubulin005	1	0.864948
	DI Islets Low glucose Glu_tub-Apl-Tubulin019	3	1.81995		DI Islets Low glucose Glu_tub-Apl-Tubulin005	2	1.30039
	DI Islets Low glucose Glu_tub-Apl-Tubulin020	1	3.02817		DI Islets Low glucose Glu_tub-Apl-Tubulin005	3	1.35664
	DI Islets Low glucose Glu_tub-Apl-Tubulin021	1	1.36574		DI Islets Low glucose Glu_tub-Apl-Tubulin006	1	1.88904
	DI Islets Low glucose Glu_tub-Apl-Tubulin021	2	1.55519		DI Islets Low glucose Glu_tub-Apl-Tubulin006	2	2.23118
	DI Islets Low glucose Glu_tub-Apl-Tubulin021	3	1.21715		DI Islets Low glucose Glu_tub-Apl-Tubulin006	3	1.76901
	DI Islets Low glucose Glu_tub-Apl-Tubulin024	1	0.848308		DI Islets Low glucose Glu_tub-Apl-Tubulin007	1	0.382557
	DI Islets Low glucose Glu_tub-Apl-Tubulin024	2	0.818418		DI Islets Low glucose Glu_tub-Apl-Tubulin007	2	0.261879
	DI Islets Low glucose Glu_tub-Apl-Tubulin026	1	0.671297		DI Islets Low glucose Glu_tub-Apl-Tubulin008	1	1.11576
	DI Islets Low glucose Glu_tub-Apl-Tubulin027	1	0.365534		DI Islets Low glucose Glu_tub-Apl-Tubulin008	2	0.775087
	DI Islets Low glucose Glu_tub-Apl-Tubulin028	1	0.929912		DI Islets Low glucose Glu_tub-Apl-Tubulin009	1	1.06874
	DI Islets Low glucose Glu_tub-Apl-Tubulin030	1	0.811178		DI Islets Low glucose Glu_tub-Apl-Tubulin009	2	1.85307
	DI Islets Low glucose Glu_tub-Apl-Tubulin031	1	0.9583		DI Islets Low glucose Glu_tub-Apl-Tubulin009	3	2.151
	DI Islets Low glucose Glu_tub-Apl-Tubulin031	2	0.788502		DI Islets Low glucose Glu_tub-Apl-Tubulin009	4	1.78221

## Sheet: Figure 1J,K
		Low Glucose				High Glucose
Date Imaged	Image	Cell #	Ratio of Glu-tubulin to tubulin	Date Imaged	Image	Cell #	Ratio of Glu-tubulin to tubulin
2020-02-03	DI Islets Low glucose Glu_tub-Apl-Tub	1	1.1305	2020-02-18	DI Islets Low glucose Glu_tub-Apl-Tubulin	1	1.57963
	DI Islets Low glucose Glu_tub-Apl-Tub001	1	2.29271		DI Islets Low glucose Glu_tub-Apl-Tubulin001	1	1.27337
	DI Islets Low glucose Glu_tub-Apl-Tub001	2	2.02415		DI Islets Low glucose Glu_tub-Apl-Tubulin001	2	1.41868
	DI Islets Low glucose Glu_tub-Apl-Tub002	1	2.67552		DI Islets Low glucose Glu_tub-Apl-Tubulin002	1	0.586825
	DI Islets Low glucose Glu_tub-Apl-Tub004	1	3.1397		DI Islets Low glucose Glu_tub-Apl-Tubulin002	2	0.386109
	DI Islets Low glucose Glu_tub-Apl-Tub004	2	0.836727		DI Islets Low glucose Glu_tub-Apl-Tubulin004	1	1.18955
	DI Islets Low glucose Glu_tub-Apl-Tub005	1	1.56481		DI Islets Low glucose Glu_tub-Apl-Tubulin004	2	1.28547
	DI Islets Low glucose Glu_tub-Apl-Tub005	2	1.64539		DI Islets Low glucose Glu_tub-Apl-Tubulin004	3	1.06614
	DI Islets Low glucose Glu_tub-Apl-Tub006	1	4.94647		DI Islets Low glucose Glu_tub-Apl-Tubulin005	1	0.292238
	DI Islets Low glucose Glu_tub-Apl-Tub007	1	1.4735		DI Islets Low glucose Glu_tub-Apl-Tubulin005	2	0.423944
	DI Islets Low glucose Glu_tub-Apl-Tub008	2	3.07259		DI Islets Low glucose Glu_tub-Apl-Tubulin006	1	0.612728
	DI Islets Low glucose Glu_tub-Apl-Tub009	1	3.72468		DI Islets Low glucose Glu_tub-Apl-Tubulin006	2	0.284549
2020-02-18	DI Islets Low glucose Glu_tub-Apl-Tubulin	1	2.63395		DI Islets Low glucose Glu_tub-Apl-Tubulin006	3	1.23839
	DI Islets Low glucose Glu_tub-Apl-Tubulin001	1	3.88061		DI Islets Low glucose Glu_tub-Apl-Tubulin007	1	0.511566
	DI Islets Low glucose Glu_tub-Apl-Tubulin002	1	3.04121		DI Islets Low glucose Glu_tub-Apl-Tubulin007	2	2.26732
	DI Islets Low glucose Glu_tub-Apl-Tubulin003	1	4.95581		DI Islets Low glucose Glu_tub-Apl-Tubulin008	1	0.672361
	DI Islets Low glucose Glu_tub-Apl-Tubulin006	1	1.20742		DI Islets Low glucose Glu_tub-Apl-Tubulin008	2	1.13527
	DI Islets Low glucose Glu_tub-Apl-Tubulin006	2	1.08004		DI Islets Low glucose Glu_tub-Apl-Tubulin009	1	0.477419
	DI Islets Low glucose Glu_tub-Apl-Tubulin007	1	4.25252		DI Islets Low glucose Glu_tub-Apl-Tubulin009	2	0.704321
	DI Islets Low glucose Glu_tub-Apl-Tubulin007	2	4.13471		DI Islets Low glucose Glu_tub-Apl-Tubulin009	3	0.614519
	DI Islets Low glucose Glu_tub-Apl-Tubulin008	1	5.19282		DI Islets Low glucose Glu_tub-Apl-Tubulin010	2	0.53795
	DI Islets Low glucose Glu_tub-Apl-Tubulin008	2	2.40969		DI Islets Low glucose Glu_tub-Apl-Tubulin010	3	0.479392
	DI Islets Low glucose Glu_tub-Apl-Tubulin009	1	2.2126		DI Islets Low glucose Glu_tub-Apl-Tubulin010	4	0.59012
	DI Islets Low glucose Glu_tub-Apl-Tubulin010	1	1.95293		DI Islets Low glucose Glu_tub-Apl-Tubulin010	5	0.587654
	DI Islets Low glucose Glu_tub-Apl-Tubulin010	2	2.51765		DI Islets Low glucose Glu_tub-Apl-Tubulin010	6	0.607703
	DI Islets Low glucose Glu_tub-Apl-Tubulin010	3	1.96966		DI Islets Low glucose Glu_tub-Apl-Tubulin010	7	0.774964
	DI Islets Low glucose Glu_tub-Apl-Tubulin011	1	2.8565		DI Islets Low glucose Glu_tub-Apl-Tubulin011	1	0.677285
	DI Islets Low glucose Glu_tub-Apl-Tubulin011	2	1.63574		DI Islets Low glucose Glu_tub-Apl-Tubulin011	2	0.658574
	DI Islets Low glucose Glu_tub-Apl-Tubulin011	3	1.73813		DI Islets Low glucose Glu_tub-Apl-Tubulin012	1	1.23859
	DI Islets Low glucose Glu_tub-Apl-Tubulin012	1	0.688635		DI Islets Low glucose Glu_tub-Apl-Tubulin012	2	1.53338
	DI Islets Low glucose Glu_tub-Apl-Tubulin012	2	1.9223		DI Islets Low glucose Glu_tub-Apl-Tubulin013	1	0.376408
	DI Islets Low glucose Glu_tub-Apl-Tubulin012	3	1.81103		DI Islets Low glucose Glu_tub-Apl-Tubulin013	2	0.474485
	DI Islets Low glucose Glu_tub-Apl-Tubulin012	4	1.9407		DI Islets Low glucose Glu_tub-Apl-Tubulin013	3	0.439722
	DI Islets Low glucose Glu_tub-Apl-Tubulin013	1	2.51785		DI Islets Low glucose Glu_tub-Apl-Tubulin014	1	1.12908
	DI Islets Low glucose Glu_tub-Apl-Tubulin013	2	2.56014		DI Islets Low glucose Glu_tub-Apl-Tubulin014	2	0.851322
	DI Islets Low glucose Glu_tub-Apl-Tubulin013	3	4.17599		DI Islets Low glucose Glu_tub-Apl-Tubulin015	2	1.78019
	DI Islets Low glucose Glu_tub-Apl-Tubulin014	1	2.47934		DI Islets Low glucose Glu_tub-Apl-Tubulin016	1	0.673553
	DI Islets Low glucose Glu_tub-Apl-Tubulin015	1	2.53954		DI Islets Low glucose Glu_tub-Apl-Tubulin016	3	1.47208
	DI Islets Low glucose Glu_tub-Apl-Tubulin016	1	3.38701		DI Islets Low glucose Glu_tub-Apl-Tubulin017	2	0.916926
	DI Islets Low glucose Glu_tub-Apl-Tubulin016	2	3.49702		DI Islets Low glucose Glu_tub-Apl-Tubulin017	3	0.308533
	DI Islets Low glucose Glu_tub-Apl-Tubulin017	1	1.81536		DI Islets Low glucose Glu_tub-Apl-Tubulin018	1	1.11278
	DI Islets Low glucose Glu_tub-Apl-Tubulin017	2	2.19474		DI Islets Low glucose Glu_tub-Apl-Tubulin019	1	0.44221
	DI Islets Low glucose Glu_tub-Apl-Tubulin018	1	1.76775		DI Islets Low glucose Glu_tub-Apl-Tubulin019	2	0.342245
	DI Islets Low glucose Glu_tub-Apl-Tubulin018	2	2.24855	2020-01-23	DI Islets Low glucose Glu_tub-Apl-Tubulin	1	0.752256
	DI Islets Low glucose Glu_tub-Apl-Tubulin018	3	2.76224		DI Islets Low glucose Glu_tub-Apl-Tubulin	2	0.208472
	DI Islets Low glucose Glu_tub-Apl-Tubulin018	4	2.30376		DI Islets Low glucose Glu_tub-Apl-Tubulin	3	1.26876
	DI Islets Low glucose Glu_tub-Apl-Tubulin018	5	1.68519		DI Islets Low glucose Glu_tub-Apl-Tubulin	4	0.396532
	DI Islets Low glucose Glu_tub-Apl-Tubulin018	6	0.239107		DI Islets Low glucose Glu_tub-Apl-Tubulin001	1	3.70744
	DI Islets Low glucose Glu_tub-Apl-Tubulin018	7	0.0928309		DI Islets Low glucose Glu_tub-Apl-Tubulin001	2	0.373693
	DI Islets Low glucose Glu_tub-Apl-Tubulin019	1	3.39274		DI Islets Low glucose Glu_tub-Apl-Tubulin002	1	0.190315
	DI Islets Low glucose Glu_tub-Apl-Tubulin	2	3.03098		DI Islets Low glucose Glu_tub-Apl-Tubulin002	2	0.169966
2020-02-21	DI Islets Low glucose Glu_tub-Apl-Tubulin	1	0.802859		DI Islets Low glucose Glu_tub-Apl-Tubulin002	3	0.297896
	DI Islets Low glucose Glu_tub-Apl-Tubulin	2	1.36103		DI Islets Low glucose Glu_tub-Apl-Tubulin003	1	0.269456
	DI Islets Low glucose Glu_tub-Apl-Tubulin001	1	1.65427		DI Islets Low glucose Glu_tub-Apl-Tubulin003	2	0.68999
	DI Islets Low glucose Glu_tub-Apl-Tubulin001	2	1.09982		DI Islets Low glucose Glu_tub-Apl-Tubulin004	1	2.16488
	DI Islets Low glucose Glu_tub-Apl-Tubulin002	1	0.896096		DI Islets Low glucose Glu_tub-Apl-Tubulin004	3	2.92556
	DI Islets Low glucose Glu_tub-Apl-Tubulin003	1	1.15199		DI Islets Low glucose Glu_tub-Apl-Tubulin004	3	0.073045
	DI Islets Low glucose Glu_tub-Apl-Tubulin004	1	1.04474		DI Islets Low glucose Glu_tub-Apl-Tubulin004	4	0.060499
	DI Islets Low glucose Glu_tub-Apl-Tubulin004	2	1.59885		DI Islets Low glucose Glu_tub-Apl-Tubulin005	1	0.853535
	DI Islets Low glucose Glu_tub-Apl-Tubulin004	3	1.14515		DI Islets Low glucose Glu_tub-Apl-Tubulin005	2	0.908436
	DI Islets Low glucose Glu_tub-Apl-Tubulin005	1	1.24859		DI Islets Low glucose Glu_tub-Apl-Tubulin005	3	0.117722
	DI Islets Low glucose Glu_tub-Apl-Tubulin005	2	1.23822		DI Islets Low glucose Glu_tub-Apl-Tubulin006	1	0.248955
	DI Islets Low glucose Glu_tub-Apl-Tubulin006	1	1.52716		DI Islets Low glucose Glu_tub-Apl-Tubulin006	2	0.361803
	DI Islets Low glucose Glu_tub-Apl-Tubulin006	2	1.03105		DI Islets Low glucose Glu_tub-Apl-Tubulin007	1	0.114215
	DI Islets Low glucose Glu_tub-Apl-Tubulin007	1	0.805619		DI Islets Low glucose Glu_tub-Apl-Tubulin007	2	0.106991
	DI Islets Low glucose Glu_tub-Apl-Tubulin008	1	1.20115		DI Islets Low glucose Glu_tub-Apl-Tubulin007	3	0.0699084
	DI Islets Low glucose Glu_tub-Apl-Tubulin008	2	1.37796		DI Islets Low glucose Glu_tub-Apl-Tubulin007	4	0.132609
	DI Islets Low glucose Glu_tub-Apl-Tubulin009	1	10.5585		DI Islets Low glucose Glu_tub-Apl-Tubulin008	1	1.69802
	DI Islets Low glucose Glu_tub-Apl-Tubulin009	2	8.21612		DI Islets Low glucose Glu_tub-Apl-Tubulin008	3	1.14201
	DI Islets Low glucose Glu_tub-Apl-Tubulin011	1	0.389506		DI Islets Low glucose Glu_tub-Apl-Tubulin009	1	0.753787
	DI Islets Low glucose Glu_tub-Apl-Tubulin011	2	0.461796		DI Islets Low glucose Glu_tub-Apl-Tubulin009	2	0.152718
	DI Islets Low glucose Glu_tub-Apl-Tubulin011	3	0.496825		DI Islets Low glucose Glu_tub-Apl-Tubulin010	1	0.444677
	DI Islets Low glucose Glu_tub-Apl-Tubulin012	1	1.7967		DI Islets Low glucose Glu_tub-Apl-Tubulin011	1	0.219581
	DI Islets Low glucose Glu_tub-Apl-Tubulin012	2	1.88224		DI Islets Low glucose Glu_tub-Apl-Tubulin011	2	0.145465
	DI Islets Low glucose Glu_tub-Apl-Tubulin013	1	1.41258	2020-03-02	DI Islets Low glucose Glu_tub-Apl-Tubulin	1	0.75316
	DI Islets Low glucose Glu_tub-Apl-Tubulin014	1	1.05281		DI Islets Low glucose Glu_tub-Apl-Tubulin	2	0.7371
	DI Islets Low glucose Glu_tub-Apl-Tubulin014	2	0.943869		DI Islets Low glucose Glu_tub-Apl-Tubulin001	1	1.42825
	DI Islets Low glucose Glu_tub-Apl-Tubulin014	3	0.98908		DI Islets Low glucose Glu_tub-Apl-Tubulin001	2	0.936769
	DI Islets Low glucose Glu_tub-Apl-Tubulin015	1	1.56934		DI Islets Low glucose Glu_tub-Apl-Tubulin001	3	2.00109
	DI Islets Low glucose Glu_tub-Apl-Tubulin016	1	0.825816		DI Islets Low glucose Glu_tub-Apl-Tubulin001	4	2.37414
	DI Islets Low glucose Glu_tub-Apl-Tubulin016	2	0.604034		DI Islets Low glucose Glu_tub-Apl-Tubulin002	1	1.52375
	DI Islets Low glucose Glu_tub-Apl-Tubulin016	3	0.584775		DI Islets Low glucose Glu_tub-Apl-Tubulin002	2	1.21176
	DI Islets Low glucose Glu_tub-Apl-Tubulin017	1	0.974177		DI Islets Low glucose Glu_tub-Apl-Tubulin002	3	0.535205
	DI Islets Low glucose Glu_tub-Apl-Tubulin017	2	0.699115		DI Islets Low glucose Glu_tub-Apl-Tubulin003	1	0.0721655
	DI Islets Low glucose Glu_tub-Apl-Tubulin018	1	1.63731		DI Islets Low glucose Glu_tub-Apl-Tubulin003	2	0.0985402
	DI Islets Low glucose Glu_tub-Apl-Tubulin018	2	1.59958		DI Islets Low glucose Glu_tub-Apl-Tubulin004	1	0.774609
	DI Islets Low glucose Glu_tub-Apl-Tubulin019	1	1.93254		DI Islets Low glucose Glu_tub-Apl-Tubulin004	2	1.86208
	DI Islets Low glucose Glu_tub-Apl-Tubulin019	2	1.23511		DI Islets Low glucose Glu_tub-Apl-Tubulin005	1	0.780745
	DI Islets Low glucose Glu_tub-Apl-Tubulin019	3	1.20749		DI Islets Low glucose Glu_tub-Apl-Tubulin005	2	1.87222
	DI Islets Low glucose Glu_tub-Apl-Tubulin020	1	3.1608		DI Islets Low glucose Glu_tub-Apl-Tubulin005	3	15.0145
	DI Islets Low glucose Glu_tub-Apl-Tubulin021	1	2.23811		DI Islets Low glucose Glu_tub-Apl-Tubulin006	1	2.49619
	DI Islets Low glucose Glu_tub-Apl-Tubulin021	2	2.12232		DI Islets Low glucose Glu_tub-Apl-Tubulin006	2	3.15301
	DI Islets Low glucose Glu_tub-Apl-Tubulin021	3	1.32394		DI Islets Low glucose Glu_tub-Apl-Tubulin006	3	2.87445
	DI Islets Low glucose Glu_tub-Apl-Tubulin024	1	3.25358		DI Islets Low glucose Glu_tub-Apl-Tubulin007	1	1.2852
	DI Islets Low glucose Glu_tub-Apl-Tubulin024	2	3.31066		DI Islets Low glucose Glu_tub-Apl-Tubulin007	2	1.24563
	DI Islets Low glucose Glu_tub-Apl-Tubulin026	1	3.57041		DI Islets Low glucose Glu_tub-Apl-Tubulin008	1	0.910299
	DI Islets Low glucose Glu_tub-Apl-Tubulin027	1	2.60729		DI Islets Low glucose Glu_tub-Apl-Tubulin008	2	0.716675
	DI Islets Low glucose Glu_tub-Apl-Tubulin028	1	3.90822		DI Islets Low glucose Glu_tub-Apl-Tubulin009	1	0.917813
	DI Islets Low glucose Glu_tub-Apl-Tubulin030	1	2.04177		DI Islets Low glucose Glu_tub-Apl-Tubulin009	2	1.2534
	DI Islets Low glucose Glu_tub-Apl-Tubulin031	1	1.49256		DI Islets Low glucose Glu_tub-Apl-Tubulin009	3	1.38499
	DI Islets Low glucose Glu_tub-Apl-Tubulin031	2	1.62583		DI Islets Low glucose Glu_tub-Apl-Tubulin009	4	1.07068

## Sheet: Figure 1L
		Low Glucose				High Glucose
Date Imaged	Image	Cell #	Ratio of Glu-tubulin to tubulin normalized to mean	Date Imaged	Image	Cell #	Ratio of Glu-tubulin to tubulin normalized to mean
2020-02-03	DI Islets Low glucose Glu_tub-Apl-Tub	1	0.52822	2020-02-18	DI Islets Low glucose Glu_tub-Apl-Tubulin	1	1.50046
	DI Islets Low glucose Glu_tub-Apl-Tub001	1	1.07125		DI Islets Low glucose Glu_tub-Apl-Tubulin001	1	1.20955
	DI Islets Low glucose Glu_tub-Apl-Tub001	2	0.945774		DI Islets Low glucose Glu_tub-Apl-Tubulin001	2	1.34757
	DI Islets Low glucose Glu_tub-Apl-Tub002	1	1.25012		DI Islets Low glucose Glu_tub-Apl-Tubulin002	1	0.557413
	DI Islets Low glucose Glu_tub-Apl-Tub004	1	1.46701		DI Islets Low glucose Glu_tub-Apl-Tubulin002	2	0.366757
	DI Islets Low glucose Glu_tub-Apl-Tub004	2	0.390956		DI Islets Low glucose Glu_tub-Apl-Tubulin004	1	1.12993
	DI Islets Low glucose Glu_tub-Apl-Tub005	1	0.731149		DI Islets Low glucose Glu_tub-Apl-Tubulin004	2	1.22105
	DI Islets Low glucose Glu_tub-Apl-Tub005	2	0.7688		DI Islets Low glucose Glu_tub-Apl-Tubulin004	3	1.01271
	DI Islets Low glucose Glu_tub-Apl-Tub006	1	2.31121		DI Islets Low glucose Glu_tub-Apl-Tubulin005	1	0.277591
	DI Islets Low glucose Glu_tub-Apl-Tub007	1	0.688483		DI Islets Low glucose Glu_tub-Apl-Tubulin005	2	0.402696
	DI Islets Low glucose Glu_tub-Apl-Tub008	2	1.43565		DI Islets Low glucose Glu_tub-Apl-Tubulin006	1	0.582018
	DI Islets Low glucose Glu_tub-Apl-Tub009	1	1.74034		DI Islets Low glucose Glu_tub-Apl-Tubulin006	2	0.270288
2020-02-18	DI Islets Low glucose Glu_tub-Apl-Tubulin	1	1.2307		DI Islets Low glucose Glu_tub-Apl-Tubulin006	3	1.17632
	DI Islets Low glucose Glu_tub-Apl-Tubulin001	1	1.81319		DI Islets Low glucose Glu_tub-Apl-Tubulin007	1	0.485926
	DI Islets Low glucose Glu_tub-Apl-Tubulin002	1	1.42099		DI Islets Low glucose Glu_tub-Apl-Tubulin007	2	2.15369
	DI Islets Low glucose Glu_tub-Apl-Tubulin003	1	2.31558		DI Islets Low glucose Glu_tub-Apl-Tubulin008	1	0.638663
	DI Islets Low glucose Glu_tub-Apl-Tubulin006	1	0.56416		DI Islets Low glucose Glu_tub-Apl-Tubulin008	2	1.07837
	DI Islets Low glucose Glu_tub-Apl-Tubulin006	2	0.504645		DI Islets Low glucose Glu_tub-Apl-Tubulin009	1	0.453491
	DI Islets Low glucose Glu_tub-Apl-Tubulin007	1	1.98697		DI Islets Low glucose Glu_tub-Apl-Tubulin009	2	0.66902
	DI Islets Low glucose Glu_tub-Apl-Tubulin007	2	1.93192		DI Islets Low glucose Glu_tub-Apl-Tubulin009	3	0.58372
	DI Islets Low glucose Glu_tub-Apl-Tubulin008	1	2.42632		DI Islets Low glucose Glu_tub-Apl-Tubulin010	2	0.510988
	DI Islets Low glucose Glu_tub-Apl-Tubulin008	2	1.12592		DI Islets Low glucose Glu_tub-Apl-Tubulin010	3	0.455365
	DI Islets Low glucose Glu_tub-Apl-Tubulin009	1	1.03383		DI Islets Low glucose Glu_tub-Apl-Tubulin010	4	0.560543
	DI Islets Low glucose Glu_tub-Apl-Tubulin010	1	0.912495		DI Islets Low glucose Glu_tub-Apl-Tubulin010	5	0.558201
	DI Islets Low glucose Glu_tub-Apl-Tubulin010	2	1.17636		DI Islets Low glucose Glu_tub-Apl-Tubulin010	6	0.577246
	DI Islets Low glucose Glu_tub-Apl-Tubulin010	3	0.920315		DI Islets Low glucose Glu_tub-Apl-Tubulin010	7	0.736123
	DI Islets Low glucose Glu_tub-Apl-Tubulin011	1	1.33468		DI Islets Low glucose Glu_tub-Apl-Tubulin011	1	0.643339
	DI Islets Low glucose Glu_tub-Apl-Tubulin011	2	0.764293		DI Islets Low glucose Glu_tub-Apl-Tubulin011	2	0.625567
	DI Islets Low glucose Glu_tub-Apl-Tubulin011	3	0.812132		DI Islets Low glucose Glu_tub-Apl-Tubulin012	1	1.17651
	DI Islets Low glucose Glu_tub-Apl-Tubulin012	1	0.321761		DI Islets Low glucose Glu_tub-Apl-Tubulin012	2	1.45653
	DI Islets Low glucose Glu_tub-Apl-Tubulin012	2	0.898185		DI Islets Low glucose Glu_tub-Apl-Tubulin013	1	0.357542
	DI Islets Low glucose Glu_tub-Apl-Tubulin012	3	0.846195		DI Islets Low glucose Glu_tub-Apl-Tubulin013	2	0.450704
	DI Islets Low glucose Glu_tub-Apl-Tubulin012	4	0.906783		DI Islets Low glucose Glu_tub-Apl-Tubulin013	3	0.417684
	DI Islets Low glucose Glu_tub-Apl-Tubulin013	1	1.17645		DI Islets Low glucose Glu_tub-Apl-Tubulin014	1	1.07249
	DI Islets Low glucose Glu_tub-Apl-Tubulin013	2	1.19621		DI Islets Low glucose Glu_tub-Apl-Tubulin014	2	0.808654
	DI Islets Low glucose Glu_tub-Apl-Tubulin013	3	1.95121		DI Islets Low glucose Glu_tub-Apl-Tubulin015	2	1.69097
	DI Islets Low glucose Glu_tub-Apl-Tubulin014	1	1.15846		DI Islets Low glucose Glu_tub-Apl-Tubulin016	1	0.639795
	DI Islets Low glucose Glu_tub-Apl-Tubulin015	1	1.18658		DI Islets Low glucose Glu_tub-Apl-Tubulin016	3	1.3983
	DI Islets Low glucose Glu_tub-Apl-Tubulin016	1	1.58256		DI Islets Low glucose Glu_tub-Apl-Tubulin017	2	0.87097
	DI Islets Low glucose Glu_tub-Apl-Tubulin016	2	1.63397		DI Islets Low glucose Glu_tub-Apl-Tubulin017	3	0.293069
	DI Islets Low glucose Glu_tub-Apl-Tubulin017	1	0.848216		DI Islets Low glucose Glu_tub-Apl-Tubulin018	1	1.057
	DI Islets Low glucose Glu_tub-Apl-Tubulin017	2	1.02548		DI Islets Low glucose Glu_tub-Apl-Tubulin019	1	0.420047
	DI Islets Low glucose Glu_tub-Apl-Tubulin018	1	0.825971		DI Islets Low glucose Glu_tub-Apl-Tubulin019	2	0.325092
	DI Islets Low glucose Glu_tub-Apl-Tubulin018	2	1.05062	2020-01-23	DI Islets Low glucose Glu_tub-Apl-Tubulin	1	0.714553
	DI Islets Low glucose Glu_tub-Apl-Tubulin018	3	1.29064		DI Islets Low glucose Glu_tub-Apl-Tubulin	2	0.198023
	DI Islets Low glucose Glu_tub-Apl-Tubulin018	4	1.07642		DI Islets Low glucose Glu_tub-Apl-Tubulin	3	1.20517
	DI Islets Low glucose Glu_tub-Apl-Tubulin018	5	0.787397		DI Islets Low glucose Glu_tub-Apl-Tubulin	4	0.376658
	DI Islets Low glucose Glu_tub-Apl-Tubulin018	6	0.111721		DI Islets Low glucose Glu_tub-Apl-Tubulin001	1	3.52162
	DI Islets Low glucose Glu_tub-Apl-Tubulin018	7	0.0433747		DI Islets Low glucose Glu_tub-Apl-Tubulin001	2	0.354964
	DI Islets Low glucose Glu_tub-Apl-Tubulin019	1	1.58524		DI Islets Low glucose Glu_tub-Apl-Tubulin002	1	0.180777
	DI Islets Low glucose Glu_tub-Apl-Tubulin	2	1.41621		DI Islets Low glucose Glu_tub-Apl-Tubulin002	2	0.161447
2020-02-21	DI Islets Low glucose Glu_tub-Apl-Tubulin	1	0.375131		DI Islets Low glucose Glu_tub-Apl-Tubulin002	3	0.282965
	DI Islets Low glucose Glu_tub-Apl-Tubulin	2	0.635932		DI Islets Low glucose Glu_tub-Apl-Tubulin003	1	0.255951
	DI Islets Low glucose Glu_tub-Apl-Tubulin001	1	0.772949		DI Islets Low glucose Glu_tub-Apl-Tubulin003	2	0.655408
	DI Islets Low glucose Glu_tub-Apl-Tubulin001	2	0.513883		DI Islets Low glucose Glu_tub-Apl-Tubulin004	1	2.05638
	DI Islets Low glucose Glu_tub-Apl-Tubulin002	1	0.418696		DI Islets Low glucose Glu_tub-Apl-Tubulin004	3	2.77893
	DI Islets Low glucose Glu_tub-Apl-Tubulin003	1	0.538262		DI Islets Low glucose Glu_tub-Apl-Tubulin004	3	0.0693841
	DI Islets Low glucose Glu_tub-Apl-Tubulin004	1	0.488151		DI Islets Low glucose Glu_tub-Apl-Tubulin004	4	0.0574669
	DI Islets Low glucose Glu_tub-Apl-Tubulin004	2	0.747052		DI Islets Low glucose Glu_tub-Apl-Tubulin005	1	0.810756
	DI Islets Low glucose Glu_tub-Apl-Tubulin004	3	0.535065		DI Islets Low glucose Glu_tub-Apl-Tubulin005	2	0.862905
	DI Islets Low glucose Glu_tub-Apl-Tubulin005	1	0.583396		DI Islets Low glucose Glu_tub-Apl-Tubulin005	3	0.111822
	DI Islets Low glucose Glu_tub-Apl-Tubulin005	2	0.578551		DI Islets Low glucose Glu_tub-Apl-Tubulin006	1	0.236478
	DI Islets Low glucose Glu_tub-Apl-Tubulin006	1	0.713558		DI Islets Low glucose Glu_tub-Apl-Tubulin006	2	0.34367
	DI Islets Low glucose Glu_tub-Apl-Tubulin006	2	0.481752		DI Islets Low glucose Glu_tub-Apl-Tubulin007	1	0.108491
	DI Islets Low glucose Glu_tub-Apl-Tubulin007	1	0.376421		DI Islets Low glucose Glu_tub-Apl-Tubulin007	2	0.101628
	DI Islets Low glucose Glu_tub-Apl-Tubulin008	1	0.561229		DI Islets Low glucose Glu_tub-Apl-Tubulin007	3	0.0664047
	DI Islets Low glucose Glu_tub-Apl-Tubulin008	2	0.643845		DI Islets Low glucose Glu_tub-Apl-Tubulin007	4	0.125963
	DI Islets Low glucose Glu_tub-Apl-Tubulin009	1	4.93338		DI Islets Low glucose Glu_tub-Apl-Tubulin008	1	1.61292
	DI Islets Low glucose Glu_tub-Apl-Tubulin009	2	3.83894		DI Islets Low glucose Glu_tub-Apl-Tubulin008	3	1.08477
	DI Islets Low glucose Glu_tub-Apl-Tubulin011	1	0.181995		DI Islets Low glucose Glu_tub-Apl-Tubulin009	1	0.716008
	DI Islets Low glucose Glu_tub-Apl-Tubulin011	2	0.215771		DI Islets Low glucose Glu_tub-Apl-Tubulin009	2	0.145064
	DI Islets Low glucose Glu_tub-Apl-Tubulin011	3	0.232139		DI Islets Low glucose Glu_tub-Apl-Tubulin010	1	0.42239
	DI Islets Low glucose Glu_tub-Apl-Tubulin012	1	0.839498		DI Islets Low glucose Glu_tub-Apl-Tubulin011	1	0.208576
	DI Islets Low glucose Glu_tub-Apl-Tubulin012	2	0.879466		DI Islets Low glucose Glu_tub-Apl-Tubulin011	2	0.138174
	DI Islets Low glucose Glu_tub-Apl-Tubulin013	1	0.660022	2020-03-02	DI Islets Low glucose Glu_tub-Apl-Tubulin	1	0.715412
	DI Islets Low glucose Glu_tub-Apl-Tubulin014	1	0.491922		DI Islets Low glucose Glu_tub-Apl-Tubulin	2	0.700157
	DI Islets Low glucose Glu_tub-Apl-Tubulin014	2	0.441017		DI Islets Low glucose Glu_tub-Apl-Tubulin001	1	1.35667
	DI Islets Low glucose Glu_tub-Apl-Tubulin014	3	0.462142		DI Islets Low glucose Glu_tub-Apl-Tubulin001	2	0.889819
	DI Islets Low glucose Glu_tub-Apl-Tubulin015	1	0.733268		DI Islets Low glucose Glu_tub-Apl-Tubulin001	3	1.9008
	DI Islets Low glucose Glu_tub-Apl-Tubulin016	1	0.385858		DI Islets Low glucose Glu_tub-Apl-Tubulin001	4	2.25515
	DI Islets Low glucose Glu_tub-Apl-Tubulin016	2	0.282232		DI Islets Low glucose Glu_tub-Apl-Tubulin002	1	1.44738
	DI Islets Low glucose Glu_tub-Apl-Tubulin016	3	0.273233		DI Islets Low glucose Glu_tub-Apl-Tubulin002	2	1.15103
	DI Islets Low glucose Glu_tub-Apl-Tubulin017	1	0.455179		DI Islets Low glucose Glu_tub-Apl-Tubulin002	3	0.508381
	DI Islets Low glucose Glu_tub-Apl-Tubulin017	2	0.326658		DI Islets Low glucose Glu_tub-Apl-Tubulin003	1	0.0685486
	DI Islets Low glucose Glu_tub-Apl-Tubulin018	1	0.765022		DI Islets Low glucose Glu_tub-Apl-Tubulin003	2	0.0936014
	DI Islets Low glucose Glu_tub-Apl-Tubulin018	2	0.747393		DI Islets Low glucose Glu_tub-Apl-Tubulin004	1	0.735786
	DI Islets Low glucose Glu_tub-Apl-Tubulin019	1	0.902971		DI Islets Low glucose Glu_tub-Apl-Tubulin004	2	1.76875
	DI Islets Low glucose Glu_tub-Apl-Tubulin019	2	0.577101		DI Islets Low glucose Glu_tub-Apl-Tubulin005	1	0.741615
	DI Islets Low glucose Glu_tub-Apl-Tubulin019	3	0.564194		DI Islets Low glucose Glu_tub-Apl-Tubulin005	2	1.77839
	DI Islets Low glucose Glu_tub-Apl-Tubulin020	1	1.47686		DI Islets Low glucose Glu_tub-Apl-Tubulin005	3	14.262
	DI Islets Low glucose Glu_tub-Apl-Tubulin021	1	1.04574		DI Islets Low glucose Glu_tub-Apl-Tubulin006	1	2.37108
	DI Islets Low glucose Glu_tub-Apl-Tubulin021	2	0.991641		DI Islets Low glucose Glu_tub-Apl-Tubulin006	2	2.99498
	DI Islets Low glucose Glu_tub-Apl-Tubulin021	3	0.618605		DI Islets Low glucose Glu_tub-Apl-Tubulin006	3	2.73038
	DI Islets Low glucose Glu_tub-Apl-Tubulin024	1	1.52022		DI Islets Low glucose Glu_tub-Apl-Tubulin007	1	1.22079
	DI Islets Low glucose Glu_tub-Apl-Tubulin024	2	1.54689		DI Islets Low glucose Glu_tub-Apl-Tubulin007	2	1.1832
	DI Islets Low glucose Glu_tub-Apl-Tubulin026	1	1.66826		DI Islets Low glucose Glu_tub-Apl-Tubulin008	1	0.864676
	DI Islets Low glucose Glu_tub-Apl-Tubulin027	1	1.21824		DI Islets Low glucose Glu_tub-Apl-Tubulin008	2	0.680756
	DI Islets Low glucose Glu_tub-Apl-Tubulin028	1	1.8261		DI Islets Low glucose Glu_tub-Apl-Tubulin009	1	0.871813
	DI Islets Low glucose Glu_tub-Apl-Tubulin030	1	0.954006		DI Islets Low glucose Glu_tub-Apl-Tubulin009	2	1.19058
	DI Islets Low glucose Glu_tub-Apl-Tubulin031	1	0.697392		DI Islets Low glucose Glu_tub-Apl-Tubulin009	3	1.31557
	DI Islets Low glucose Glu_tub-Apl-Tubulin031	2	0.759662		DI Islets Low glucose Glu_tub-Apl-Tubulin009	4	1.01702

## Sheet: Figure 1Q,R
			Low Glucose						High Glucose
Date Imaged	Image	Cell #	Average Intensity- Tubulin	Background Average Intensity- Tubulin	Average Intensity with background subtracted- Tubulin	Date Imaged	Image	Cell #	Average Intensity- Tubulin	Background Average Intensity- Tubulin	Average Intensity with background subtracted- Tubulin
3/2/2020 Repeat 1	DI Islets Low glucose Glu_tub-Apl-Tubulin	1	142.026	51.42	90.606	3-2-20 Repeat 1	DI Islets High glucose Glu_tub-Apl-Tubulin	1	64.544	51.823	12.721
	DI Islets Low glucose Glu_tub-Apl-Tubulin	2	172.384	51.42	120.964		DI Islets High glucose Glu_tub-Apl-Tubulin	2	77.572	51.823	25.749
	DI Islets Low glucose Glu_tub-Apl-Tubulin	3	130.167	51.42	78.747		DI Islets High glucose Glu_tub-Apl-Tubulin001	1	105.038	51.928	53.11
	DI Islets Low glucose Glu_tub-Apl-Tubulin	4	95.621	51.42	44.201		DI Islets High glucose Glu_tub-Apl-Tubulin001	2	104.886	51.928	52.958
	DI Islets Low glucose Glu_tub-Apl-Tubulin001	1	107.945	51.56	56.385		DI Islets High glucose Glu_tub-Apl-Tubulin001	3	64.196	51.928	12.268
	DI Islets Low glucose Glu_tub-Apl-Tubulin001	2	100.01	51.56	48.45		DI Islets High glucose Glu_tub-Apl-Tubulin002	1	105.738	59.669	46.069
	DI Islets Low glucose Glu_tub-Apl-Tubulin002	1	89.933	51.982	37.951		DI Islets High glucose Glu_tub-Apl-Tubulin002	2	96.862	59.669	37.193
	DI Islets Low glucose Glu_tub-Apl-Tubulin002	2	98.759	51.982	46.777		DI Islets High glucose Glu_tub-Apl-Tubulin003	1	87.213	56.471	30.742
	DI Islets Low glucose Glu_tub-Apl-Tubulin003	1	194.286	57.527	136.759		DI Islets High glucose Glu_tub-Apl-Tubulin003	2	99.583	56.471	43.112
	DI Islets Low glucose Glu_tub-Apl-Tubulin003	2	106.238	57.527	48.711		DI Islets High glucose Glu_tub-Apl-Tubulin003	3	104.647	56.471	48.176
	DI Islets Low glucose Glu_tub-Apl-Tubulin004	1	267.948	81.614	186.334		DI Islets High glucose Glu_tub-Apl-Tubulin004	1	81.751	53.116	28.635
	DI Islets Low glucose Glu_tub-Apl-Tubulin004	2	254.418	81.614	172.804		DI Islets High glucose Glu_tub-Apl-Tubulin004	2	105.346	53.116	52.23
	DI Islets Low glucose Glu_tub-Apl-Tubulin004	3	221.898	81.614	140.284		DI Islets High glucose Glu_tub-Apl-Tubulin005	1	87.385	54.342	33.043
	DI Islets Low glucose Glu_tub-Apl-Tubulin005	1	270.916	58.718	212.198		DI Islets High glucose Glu_tub-Apl-Tubulin005	2	78.038	54.342	23.696
	DI Islets Low glucose Glu_tub-Apl-Tubulin005	2	158.788	58.718	100.07		DI Islets High glucose Glu_tub-Apl-Tubulin006	1	125.067	52.347	72.72
	DI Islets Low glucose Glu_tub-Apl-Tubulin005	3	131.361	58.718	72.643		DI Islets High glucose Glu_tub-Apl-Tubulin006	2	112.398	52.347	60.051
	DI Islets Low glucose Glu_tub-Apl-Tubulin006	1	175.829	51.54	124.289		DI Islets High glucose Glu_tub-Apl-Tubulin006	3	87.517	52.347	35.17
	DI Islets Low glucose Glu_tub-Apl-Tubulin006	2	85.549	51.54	34.009		DI Islets High glucose Glu_tub-Apl-Tubulin007	1	113.418	52.518	60.9
	DI Islets Low glucose Glu_tub-Apl-Tubulin007	1	239.601	85.454	154.147		DI Islets High glucose Glu_tub-Apl-Tubulin007	2	204.665	52.518	152.147
	DI Islets Low glucose Glu_tub-Apl-Tubulin007	2	171.764	85.454	86.31		DI Islets High glucose Glu_tub-Apl-Tubulin008	1	174.117	52.118	121.999
	DI Islets Low glucose Glu_tub-Apl-Tubulin008	1	279.921	84.512	195.409		DI Islets High glucose Glu_tub-Apl-Tubulin008	2	143.042	52.118	90.924
	DI Islets Low glucose Glu_tub-Apl-Tubulin008	2	250.632	84.512	166.12		DI Islets High glucose Glu_tub-Apl-Tubulin008	3	180.175	52.118	128.057
	DI Islets Low glucose Glu_tub-Apl-Tubulin008	3	147.831	84.512	63.319		DI Islets High glucose Glu_tub-Apl-Tubulin008	4	255.069	52.118	202.951
	DI Islets Low glucose Glu_tub-Apl-Tubulin009	1	184.342	60.147	124.195		DI Islets High glucose Glu_tub-Apl-Tubulin008	5	70.972	52.118	18.854
	DI Islets Low glucose Glu_tub-Apl-Tubulin010	1	139.786	52.811	86.975		DI Islets High glucose Glu_tub-Apl-Tubulin009	1	97.526	57.151	40.375
	DI Islets Low glucose Glu_tub-Apl-Tubulin010	2	189.459	52.811	136.648		DI Islets High glucose Glu_tub-Apl-Tubulin009	2	92.022	57.151	34.871
	DI Islets Low glucose Glu_tub-Apl-Tubulin011	1	122.414	78.282	44.132		DI Islets High glucose Glu_tub-Apl-Tubulin010	1	212.227	55.928	156.299
	DI Islets Low glucose Glu_tub-Apl-Tubulin011	2	168.442	78.282	90.16		DI Islets High glucose Glu_tub-Apl-Tubulin010	2	167.37	55.928	111.442
	DI Islets Low glucose Glu_tub-Apl-Tubulin011	3	173.623	78.282	95.341		DI Islets High glucose Glu_tub-Apl-Tubulin010	3	207.296	55.928	151.368
	DI Islets Low glucose Glu_tub-Apl-Tubulin011	4	168.658	78.282	90.376		DI Islets High glucose Glu_tub-Apl-Tubulin010	4	134.166	55.928	78.238
	DI Islets Low glucose Glu_tub-Apl-Tubulin013	1	154.841	34.558	120.283		DI Islets High glucose Glu_tub-Apl-Tubulin011	1	185.383	55.462	129.921
	DI Islets Low glucose Glu_tub-Apl-Tubulin013	2	175.799	34.558	141.241		DI Islets High glucose Glu_tub-Apl-Tubulin011	2	168.36	55.462	112.898
	DI Islets Low glucose Glu_tub-Apl-Tubulin014	1	200.851	79.318	121.533		DI Islets High glucose Glu_tub-Apl-Tubulin012	1	81.453	51.721	29.732
	DI Islets Low glucose Glu_tub-Apl-Tubulin014	2	158.21	79.318	78.892		DI Islets High glucose Glu_tub-Apl-Tubulin012	2	86.365	51.721	34.644
	DI Islets Low glucose Glu_tub-Apl-Tubulin014	3	218.916	79.318	139.598		DI Islets High glucose Glu_tub-Apl-Tubulin013	1	74.761	55.844	18.917
3-2-20 Repeat 2	DI Islets Low glucose Glu_tub-Apl-Tubulin	1	337.699	41.715	295.984		DI Islets High glucose Glu_tub-Apl-Tubulin013	2	304.48	55.844	248.636
	DI Islets Low glucose Glu_tub-Apl-Tubulin	2	276.005	41.715	234.29		DI Islets High glucose Glu_tub-Apl-Tubulin014	1	190.969	52.261	138.708
	DI Islets Low glucose Glu_tub-Apl-Tubulin	3	185.744	41.715	144.029		DI Islets High glucose Glu_tub-Apl-Tubulin014	2	155.095	52.261	102.834
	DI Islets Low glucose Glu_tub-Apl-Tubulin001	1	353.028	51.004	302.024		DI Islets High glucose Glu_tub-Apl-Tubulin014	3	144.08	52.261	91.819
	DI Islets Low glucose Glu_tub-Apl-Tubulin001	2	294.782	51.004	243.778	3-2-20-2	DI Islets High glucose Glu_tub-Apl-Tubulin	1	121.045	76.056	44.989
	DI Islets Low glucose Glu_tub-Apl-Tubulin002	1	190.091	51.34	138.751		DI Islets High glucose Glu_tub-Apl-Tubulin	2	145.341	76.056	69.285
	DI Islets Low glucose Glu_tub-Apl-Tubulin002	2	197.744	51.34	146.404		DI Islets High glucose Glu_tub-Apl-Tubulin001	1	75.84	51.049	24.791
	DI Islets Low glucose Glu_tub-Apl-Tubulin003	1	248.681	54.097	194.584		DI Islets High glucose Glu_tub-Apl-Tubulin001	2	70.172	51.049	19.123
	DI Islets Low glucose Glu_tub-Apl-Tubulin003	2	189.217	54.097	135.12		DI Islets High glucose Glu_tub-Apl-Tubulin002	1	140.858	52.644	88.214
	DI Islets Low glucose Glu_tub-Apl-Tubulin004	1	326.089	224.626	101.463		DI Islets High glucose Glu_tub-Apl-Tubulin002	2	176.674	52.644	124.03
	DI Islets Low glucose Glu_tub-Apl-Tubulin004	2	517.918	224.626	293.292		DI Islets High glucose Glu_tub-Apl-Tubulin002	3	239.11	52.644	186.466
	DI Islets Low glucose Glu_tub-Apl-Tubulin004	3	560.949	224.626	336.323		DI Islets High glucose Glu_tub-Apl-Tubulin002	4	241.44	52.644	188.796
	DI Islets Low glucose Glu_tub-Apl-Tubulin004	4	559.252	224.626	334.626		DI Islets High glucose Glu_tub-Apl-Tubulin002	5	98.885	52.644	46.241
	DI Islets Low glucose Glu_tub-Apl-Tubulin004	5	382.989	224.626	158.363		DI Islets High glucose Glu_tub-Apl-Tubulin002	6	155.428	52.644	102.784
	DI Islets Low glucose Glu_tub-Apl-Tubulin004	6	453.029	224.626	228.403		DI Islets High glucose Glu_tub-Apl-Tubulin003	1	111.85	51.438	60.412
	DI Islets Low glucose Glu_tub-Apl-Tubulin005	1	469.359	71.533	397.826		DI Islets High glucose Glu_tub-Apl-Tubulin003	2	95.276	51.438	43.838
	DI Islets Low glucose Glu_tub-Apl-Tubulin005	2	250.22	71.533	178.687		DI Islets High glucose Glu_tub-Apl-Tubulin003	3	88.757	51.438	37.319
	DI Islets Low glucose Glu_tub-Apl-Tubulin006	1	513.798	251.742	262.056		DI Islets High glucose Glu_tub-Apl-Tubulin003	4	96.653	51.438	45.215
	DI Islets Low glucose Glu_tub-Apl-Tubulin006	2	424.404	251.742	172.662		DI Islets High glucose Glu_tub-Apl-Tubulin003	5	109.468	51.438	58.03
	DI Islets Low glucose Glu_tub-Apl-Tubulin006	3	572.258	251.742	320.516		DI Islets High glucose Glu_tub-Apl-Tubulin004	1	91.394	51.299	40.095
	DI Islets Low glucose Glu_tub-Apl-Tubulin007	1	168.625	74.097	94.528		DI Islets High glucose Glu_tub-Apl-Tubulin004	2	68.971	51.299	17.672
	DI Islets Low glucose Glu_tub-Apl-Tubulin007	2	158.439	74.097	84.342		DI Islets High glucose Glu_tub-Apl-Tubulin004	3	85.852	51.299	34.553
	DI Islets Low glucose Glu_tub-Apl-Tubulin007	3	208.782	74.097	134.685		DI Islets High glucose Glu_tub-Apl-Tubulin005	1	144.747	54.861	89.886
	DI Islets Low glucose Glu_tub-Apl-Tubulin008	1	226.608	58.795	167.813		DI Islets High glucose Glu_tub-Apl-Tubulin006	1	122.542	67.097	55.445
	DI Islets Low glucose Glu_tub-Apl-Tubulin008	2	337.094	58.795	278.299		DI Islets High glucose Glu_tub-Apl-Tubulin006	2	117.949	67.097	50.852
	DI Islets Low glucose Glu_tub-Apl-Tubulin008	3	265.8	58.795	207.005		DI Islets High glucose Glu_tub-Apl-Tubulin007	1	134.527	55.507	79.02
	DI Islets Low glucose Glu_tub-Apl-Tubulin009	1	108.326	77.715	30.611		DI Islets High glucose Glu_tub-Apl-Tubulin007	2	107.279	55.507	51.772
	DI Islets Low glucose Glu_tub-Apl-Tubulin009	2	126.931	77.715	49.216		DI Islets High glucose Glu_tub-Apl-Tubulin008	1	128.08	59.493	68.587
	DI Islets Low glucose Glu_tub-Apl-Tubulin010	1	190.143	53.159	136.984		DI Islets High glucose Glu_tub-Apl-Tubulin008	2	144.406	59.493	84.913
	DI Islets Low glucose Glu_tub-Apl-Tubulin010	2	222.625	53.159	169.466		DI Islets High glucose Glu_tub-Apl-Tubulin009	1	117.269	56.681	60.588
	DI Islets Low glucose Glu_tub-Apl-Tubulin010	3	217.202	53.159	164.043		DI Islets High glucose Glu_tub-Apl-Tubulin009	2	169.943	56.681	113.262
	DI Islets Low glucose Glu_tub-Apl-Tubulin010	4	155.437	53.159	102.278		DI Islets High glucose Glu_tub-Apl-Tubulin011	1	98.207	53.917	44.29
	DI Islets Low glucose Glu_tub-Apl-Tubulin011	1	178.377	77.628	100.749		DI Islets High glucose Glu_tub-Apl-Tubulin011	2	103.955	53.917	50.038
	DI Islets Low glucose Glu_tub-Apl-Tubulin011	2	103.036	77.628	25.408		DI Islets High glucose Glu_tub-Apl-Tubulin012	1	111.045	56.729	54.316
	DI Islets Low glucose Glu_tub-Apl-Tubulin011	3	225.561	77.628	147.933		DI Islets High glucose Glu_tub-Apl-Tubulin012	2	117.644	56.729	60.915
	DI Islets Low glucose Glu_tub-Apl-Tubulin011	4	271.495	77.628	193.867		DI Islets High glucose Glu_tub-Apl-Tubulin013	1	78.124	51.479	26.645
	DI Islets Low glucose Glu_tub-Apl-Tubulin012	1	89.251	68.433	20.818		DI Islets High glucose Glu_tub-Apl-Tubulin013	2	89.92	51.479	38.441
	DI Islets Low glucose Glu_tub-Apl-Tubulin012	2	101.623	68.433	33.19		DI Islets High glucose Glu_tub-Apl-Tubulin014	1	108.286	52.215	56.071
	DI Islets Low glucose Glu_tub-Apl-Tubulin013	1	227.089	53.662	173.427		DI Islets High glucose Glu_tub-Apl-Tubulin014	2	103.869	52.215	51.654
	DI Islets Low glucose Glu_tub-Apl-Tubulin013	2	202.882	53.662	149.22	2020-02-19	DI Islets High glucose Glu_tub-Apl-Tubulin	1	172.697	53.07	119.627
	DI Islets Low glucose Glu_tub-Apl-Tubulin014	1	138.532	64.42	74.112		DI Islets High glucose Glu_tub-Apl-Tubulin	2	212.386	53.07	159.316
	DI Islets Low glucose Glu_tub-Apl-Tubulin014	2	135.247	64.42	70.827		DI Islets High glucose Glu_tub-Apl-Tubulin	3	94.831	53.07	41.761
2020-02-19	DI Islets Low glucose Glu_tub-Apl-Tubulin	1	142.215	21.402	120.813		DI Islets High glucose Glu_tub-Apl-Tubulin001	1	116.424	59.883	56.541
	DI Islets Low glucose Glu_tub-Apl-Tubulin	2	198.408	21.402	177.006		DI Islets High glucose Glu_tub-Apl-Tubulin001	2	111.884	59.883	52.001
	DI Islets Low glucose Glu_tub-Apl-Tubulin001	1	211.01	52.328	158.682		DI Islets High glucose Glu_tub-Apl-Tubulin002	1	96.426	52.636	43.79
	DI Islets Low glucose Glu_tub-Apl-Tubulin001	2	233.559	52.328	181.231		DI Islets High glucose Glu_tub-Apl-Tubulin002	2	97.216	52.636	44.58
	DI Islets Low glucose Glu_tub-Apl-Tubulin002	1	148.384	58.326	90.058		DI Islets High glucose Glu_tub-Apl-Tubulin003	1	241.695	61.767	179.928
	DI Islets Low glucose Glu_tub-Apl-Tubulin002	2	229.947	58.326	171.621		DI Islets High glucose Glu_tub-Apl-Tubulin003	2	149.57	61.767	87.803
	DI Islets Low glucose Glu_tub-Apl-Tubulin002	3	186.221	58.326	127.895		DI Islets High glucose Glu_tub-Apl-Tubulin003	3	135.489	61.767	73.722
	DI Islets Low glucose Glu_tub-Apl-Tubulin003	1	182.697	57.328	125.369		DI Islets High glucose Glu_tub-Apl-Tubulin003	4	117.143	61.767	55.376
	DI Islets Low glucose Glu_tub-Apl-Tubulin003	2	154.822	57.328	97.494		DI Islets High glucose Glu_tub-Apl-Tubulin004	1	78.277	53.965	24.312
	DI Islets Low glucose Glu_tub-Apl-Tubulin004	1	203.506	69.345	134.161		DI Islets High glucose Glu_tub-Apl-Tubulin004	2	119.032	53.965	65.067
	DI Islets Low glucose Glu_tub-Apl-Tubulin005	1	199.877	63.221	136.656		DI Islets High glucose Glu_tub-Apl-Tubulin004	3	119.032	53.965	65.067
	DI Islets Low glucose Glu_tub-Apl-Tubulin005	2	154.946	63.221	91.725		DI Islets High glucose Glu_tub-Apl-Tubulin005	1	92.598	52.142	40.456
	DI Islets Low glucose Glu_tub-Apl-Tubulin005	3	121.431	63.221	58.21		DI Islets High glucose Glu_tub-Apl-Tubulin005	2	94.947	52.142	42.805
	DI Islets Low glucose Glu_tub-Apl-Tubulin005	4	199.663	63.221	136.442		DI Islets High glucose Glu_tub-Apl-Tubulin006	1	116.617	52.527	64.09
	DI Islets Low glucose Glu_tub-Apl-Tubulin005	5	196.553	63.221	133.332		DI Islets High glucose Glu_tub-Apl-Tubulin006	2	123.84	52.527	71.313
	DI Islets Low glucose Glu_tub-Apl-Tubulin006	1	159.068	107.591	51.477		DI Islets High glucose Glu_tub-Apl-Tubulin006	3	121.763	52.527	69.236
	DI Islets Low glucose Glu_tub-Apl-Tubulin006	2	182.803	107.591	75.212		DI Islets High glucose Glu_tub-Apl-Tubulin006	4	109.693	52.527	57.166
	DI Islets Low glucose Glu_tub-Apl-Tubulin006	3	259.706	107.591	152.115		DI Islets High glucose Glu_tub-Apl-Tubulin007	1	96.447	52.068	44.379
	DI Islets Low glucose Glu_tub-Apl-Tubulin006	4	229.071	107.591	121.48		DI Islets High glucose Glu_tub-Apl-Tubulin007	2	92.992	52.068	40.924
	7DI Islets Low glucose Glu_tub-Apl-Tubulin007	1	160.416	70.355	90.061		DI Islets High glucose Glu_tub-Apl-Tubulin007	3	88.793	52.068	36.725
	7DI Islets Low glucose Glu_tub-Apl-Tubulin007	2	173.11	70.355	102.755		DI Islets High glucose Glu_tub-Apl-Tubulin008	1	79.699	52.33	27.369
	7DI Islets Low glucose Glu_tub-Apl-Tubulin008	1	129.632	53.01	76.622		DI Islets High glucose Glu_tub-Apl-Tubulin008	2	110.963	52.33	58.633
	7DI Islets Low glucose Glu_tub-Apl-Tubulin008	2	99.024	53.01	46.014		DI Islets High glucose Glu_tub-Apl-Tubulin009	1	80.365	52.256	28.109
	7DI Islets Low glucose Glu_tub-Apl-Tubulin009	1	76.52	53.708	22.812

## Sheet: Figure 1S
		Low Glucose				High Glucose
Date Imaged	Image	Cell #	Normalized to mean- Tubulin	Date Imaged	Image	Cell #	Normalized to mean- Tubulin
3/2/2020 Repeat 1	DI Islets Low glucose Glu_tub-Apl-Tubulin	1	0.673175	3-2-20 Repeat 1	DI Islets High glucose Glu_tub-Apl-Tubulin	1	0.185903
	DI Islets Low glucose Glu_tub-Apl-Tubulin	2	0.898725		DI Islets High glucose Glu_tub-Apl-Tubulin	2	0.376292
	DI Islets Low glucose Glu_tub-Apl-Tubulin	3	0.585066		DI Islets High glucose Glu_tub-Apl-Tubulin001	1	0.776142
	DI Islets Low glucose Glu_tub-Apl-Tubulin	4	0.3284		DI Islets High glucose Glu_tub-Apl-Tubulin001	2	0.773921
	DI Islets Low glucose Glu_tub-Apl-Tubulin001	1	0.418923		DI Islets High glucose Glu_tub-Apl-Tubulin001	3	0.179283
	DI Islets Low glucose Glu_tub-Apl-Tubulin001	2	0.359969		DI Islets High glucose Glu_tub-Apl-Tubulin002	1	0.673246
	DI Islets Low glucose Glu_tub-Apl-Tubulin002	1	0.281964		DI Islets High glucose Glu_tub-Apl-Tubulin002	2	0.543533
	DI Islets Low glucose Glu_tub-Apl-Tubulin002	2	0.347539		DI Islets High glucose Glu_tub-Apl-Tubulin003	1	0.449259
	DI Islets Low glucose Glu_tub-Apl-Tubulin003	1	1.01608		DI Islets High glucose Glu_tub-Apl-Tubulin003	2	0.630033
	DI Islets Low glucose Glu_tub-Apl-Tubulin003	2	0.361908		DI Islets High glucose Glu_tub-Apl-Tubulin003	3	0.704037
	DI Islets Low glucose Glu_tub-Apl-Tubulin004	1	1.3844		DI Islets High glucose Glu_tub-Apl-Tubulin004	1	0.418468
	DI Islets Low glucose Glu_tub-Apl-Tubulin004	2	1.28388		DI Islets High glucose Glu_tub-Apl-Tubulin004	2	0.763282
	DI Islets Low glucose Glu_tub-Apl-Tubulin004	3	1.04227		DI Islets High glucose Glu_tub-Apl-Tubulin005	1	0.482886
	DI Islets Low glucose Glu_tub-Apl-Tubulin005	1	1.57657		DI Islets High glucose Glu_tub-Apl-Tubulin005	2	0.34629
	DI Islets Low glucose Glu_tub-Apl-Tubulin005	2	0.743489		DI Islets High glucose Glu_tub-Apl-Tubulin006	1	1.06272
	DI Islets Low glucose Glu_tub-Apl-Tubulin005	3	0.539715		DI Islets High glucose Glu_tub-Apl-Tubulin006	2	0.877577
	DI Islets Low glucose Glu_tub-Apl-Tubulin006	1	0.923429		DI Islets High glucose Glu_tub-Apl-Tubulin006	3	0.513969
	DI Islets Low glucose Glu_tub-Apl-Tubulin006	2	0.252676		DI Islets High glucose Glu_tub-Apl-Tubulin007	1	0.889984
	DI Islets Low glucose Glu_tub-Apl-Tubulin007	1	1.14526		DI Islets High glucose Glu_tub-Apl-Tubulin007	2	2.22345
	DI Islets Low glucose Glu_tub-Apl-Tubulin007	2	0.641257		DI Islets High glucose Glu_tub-Apl-Tubulin008	1	1.78288
	DI Islets Low glucose Glu_tub-Apl-Tubulin008	1	1.45183		DI Islets High glucose Glu_tub-Apl-Tubulin008	2	1.32875
	DI Islets Low glucose Glu_tub-Apl-Tubulin008	2	1.23422		DI Islets High glucose Glu_tub-Apl-Tubulin008	3	1.87141
	DI Islets Low glucose Glu_tub-Apl-Tubulin008	3	0.470441		DI Islets High glucose Glu_tub-Apl-Tubulin008	4	2.9659
	DI Islets Low glucose Glu_tub-Apl-Tubulin009	1	0.92273		DI Islets High glucose Glu_tub-Apl-Tubulin008	5	0.27553
	DI Islets Low glucose Glu_tub-Apl-Tubulin010	1	0.646197		DI Islets High glucose Glu_tub-Apl-Tubulin009	1	0.590034
	DI Islets Low glucose Glu_tub-Apl-Tubulin010	2	1.01525		DI Islets High glucose Glu_tub-Apl-Tubulin009	2	0.5096
	DI Islets Low glucose Glu_tub-Apl-Tubulin011	1	0.327887		DI Islets High glucose Glu_tub-Apl-Tubulin010	1	2.28413
	DI Islets Low glucose Glu_tub-Apl-Tubulin011	2	0.669861		DI Islets High glucose Glu_tub-Apl-Tubulin010	2	1.6286
	DI Islets Low glucose Glu_tub-Apl-Tubulin011	3	0.708354		DI Islets High glucose Glu_tub-Apl-Tubulin010	3	2.21207
	DI Islets Low glucose Glu_tub-Apl-Tubulin011	4	0.671466		DI Islets High glucose Glu_tub-Apl-Tubulin010	4	1.14336
	DI Islets Low glucose Glu_tub-Apl-Tubulin013	1	0.893665		DI Islets High glucose Glu_tub-Apl-Tubulin011	1	1.89865
	DI Islets Low glucose Glu_tub-Apl-Tubulin013	2	1.04938		DI Islets High glucose Glu_tub-Apl-Tubulin011	2	1.64988
	DI Islets Low glucose Glu_tub-Apl-Tubulin014	1	0.902953		DI Islets High glucose Glu_tub-Apl-Tubulin012	1	0.434499
	DI Islets Low glucose Glu_tub-Apl-Tubulin014	2	0.586143		DI Islets High glucose Glu_tub-Apl-Tubulin012	2	0.506282
	DI Islets Low glucose Glu_tub-Apl-Tubulin014	3	1.03717		DI Islets High glucose Glu_tub-Apl-Tubulin013	1	0.27645
3-2-20 Repeat 2	DI Islets Low glucose Glu_tub-Apl-Tubulin	1	2.19907		DI Islets High glucose Glu_tub-Apl-Tubulin013	2	3.63353
	DI Islets Low glucose Glu_tub-Apl-Tubulin	2	1.7407		DI Islets High glucose Glu_tub-Apl-Tubulin014	1	2.02706
	DI Islets Low glucose Glu_tub-Apl-Tubulin	3	1.07009		DI Islets High glucose Glu_tub-Apl-Tubulin014	2	1.5028
	DI Islets Low glucose Glu_tub-Apl-Tubulin001	1	2.24394		DI Islets High glucose Glu_tub-Apl-Tubulin014	3	1.34183
	DI Islets Low glucose Glu_tub-Apl-Tubulin001	2	1.8112	3-2-20-2	DI Islets High glucose Glu_tub-Apl-Tubulin	1	0.657463
	DI Islets Low glucose Glu_tub-Apl-Tubulin002	1	1.03088		DI Islets High glucose Glu_tub-Apl-Tubulin	2	1.01252
	DI Islets Low glucose Glu_tub-Apl-Tubulin002	2	1.08774		DI Islets High glucose Glu_tub-Apl-Tubulin001	1	0.362292
	DI Islets Low glucose Glu_tub-Apl-Tubulin003	1	1.4457		DI Islets High glucose Glu_tub-Apl-Tubulin001	2	0.279461
	DI Islets Low glucose Glu_tub-Apl-Tubulin003	2	1.0039		DI Islets High glucose Glu_tub-Apl-Tubulin002	1	1.28915
	DI Islets Low glucose Glu_tub-Apl-Tubulin004	1	0.753839		DI Islets High glucose Glu_tub-Apl-Tubulin002	2	1.81256
	DI Islets Low glucose Glu_tub-Apl-Tubulin004	2	2.17907		DI Islets High glucose Glu_tub-Apl-Tubulin002	3	2.72499
	DI Islets Low glucose Glu_tub-Apl-Tubulin004	3	2.49878		DI Islets High glucose Glu_tub-Apl-Tubulin002	4	2.75904
	DI Islets Low glucose Glu_tub-Apl-Tubulin004	4	2.48617		DI Islets High glucose Glu_tub-Apl-Tubulin002	5	0.675759
	DI Islets Low glucose Glu_tub-Apl-Tubulin004	5	1.17659		DI Islets High glucose Glu_tub-Apl-Tubulin002	6	1.50207
	DI Islets Low glucose Glu_tub-Apl-Tubulin004	6	1.69696		DI Islets High glucose Glu_tub-Apl-Tubulin003	1	0.882852
	DI Islets Low glucose Glu_tub-Apl-Tubulin005	1	2.95572		DI Islets High glucose Glu_tub-Apl-Tubulin003	2	0.640642
	DI Islets Low glucose Glu_tub-Apl-Tubulin005	2	1.32759		DI Islets High glucose Glu_tub-Apl-Tubulin003	3	0.545374
	DI Islets Low glucose Glu_tub-Apl-Tubulin006	1	1.94699		DI Islets High glucose Glu_tub-Apl-Tubulin003	4	0.660765
	DI Islets Low glucose Glu_tub-Apl-Tubulin006	2	1.28283		DI Islets High glucose Glu_tub-Apl-Tubulin003	5	0.848042
	DI Islets Low glucose Glu_tub-Apl-Tubulin006	3	2.38133		DI Islets High glucose Glu_tub-Apl-Tubulin004	1	0.585943
	DI Islets Low glucose Glu_tub-Apl-Tubulin007	1	0.702314		DI Islets High glucose Glu_tub-Apl-Tubulin004	2	0.258256
	DI Islets Low glucose Glu_tub-Apl-Tubulin007	2	0.626635		DI Islets High glucose Glu_tub-Apl-Tubulin004	3	0.504953
	DI Islets Low glucose Glu_tub-Apl-Tubulin007	3	1.00067		DI Islets High glucose Glu_tub-Apl-Tubulin005	1	1.31358
	DI Islets Low glucose Glu_tub-Apl-Tubulin008	1	1.2468		DI Islets High glucose Glu_tub-Apl-Tubulin006	1	0.810265
	DI Islets Low glucose Glu_tub-Apl-Tubulin008	2	2.06768		DI Islets High glucose Glu_tub-Apl-Tubulin006	2	0.743144
	DI Islets Low glucose Glu_tub-Apl-Tubulin008	3	1.53798		DI Islets High glucose Glu_tub-Apl-Tubulin007	1	1.15479
	DI Islets Low glucose Glu_tub-Apl-Tubulin009	1	0.22743		DI Islets High glucose Glu_tub-Apl-Tubulin007	2	0.756589
	DI Islets Low glucose Glu_tub-Apl-Tubulin009	2	0.36566		DI Islets High glucose Glu_tub-Apl-Tubulin008	1	1.00232
	DI Islets Low glucose Glu_tub-Apl-Tubulin010	1	1.01775		DI Islets High glucose Glu_tub-Apl-Tubulin008	2	1.24091
	DI Islets Low glucose Glu_tub-Apl-Tubulin010	2	1.25908		DI Islets High glucose Glu_tub-Apl-Tubulin009	1	0.885424
	DI Islets Low glucose Glu_tub-Apl-Tubulin010	3	1.21879		DI Islets High glucose Glu_tub-Apl-Tubulin009	2	1.65519
	DI Islets Low glucose Glu_tub-Apl-Tubulin010	4	0.759894		DI Islets High glucose Glu_tub-Apl-Tubulin011	1	0.647248
	DI Islets Low glucose Glu_tub-Apl-Tubulin011	1	0.748534		DI Islets High glucose Glu_tub-Apl-Tubulin011	2	0.731248
	DI Islets Low glucose Glu_tub-Apl-Tubulin011	2	0.188774		DI Islets High glucose Glu_tub-Apl-Tubulin012	1	0.793766
	DI Islets Low glucose Glu_tub-Apl-Tubulin011	3	1.0991		DI Islets High glucose Glu_tub-Apl-Tubulin012	2	0.890203
	DI Islets Low glucose Glu_tub-Apl-Tubulin011	4	1.44037		DI Islets High glucose Glu_tub-Apl-Tubulin013	1	0.389386
	DI Islets Low glucose Glu_tub-Apl-Tubulin012	1	0.154671		DI Islets High glucose Glu_tub-Apl-Tubulin013	2	0.561771
	DI Islets Low glucose Glu_tub-Apl-Tubulin012	2	0.246591		DI Islets High glucose Glu_tub-Apl-Tubulin014	1	0.819414
	DI Islets Low glucose Glu_tub-Apl-Tubulin013	1	1.28851		DI Islets High glucose Glu_tub-Apl-Tubulin014	2	0.754864
	DI Islets Low glucose Glu_tub-Apl-Tubulin013	2	1.10866	2020-02-19	DI Islets High glucose Glu_tub-Apl-Tubulin	1	1.74821
	DI Islets Low glucose Glu_tub-Apl-Tubulin014	1	0.550629		DI Islets High glucose Glu_tub-Apl-Tubulin	2	2.32822
	DI Islets Low glucose Glu_tub-Apl-Tubulin014	2	0.526223		DI Islets High glucose Glu_tub-Apl-Tubulin	3	0.610289
2020-02-19	DI Islets Low glucose Glu_tub-Apl-Tubulin	1	0.897603		DI Islets High glucose Glu_tub-Apl-Tubulin001	1	0.826282
	DI Islets Low glucose Glu_tub-Apl-Tubulin	2	1.3151		DI Islets High glucose Glu_tub-Apl-Tubulin001	2	0.759935
	DI Islets Low glucose Glu_tub-Apl-Tubulin001	1	1.17896		DI Islets High glucose Glu_tub-Apl-Tubulin002	1	0.639941
	DI Islets Low glucose Glu_tub-Apl-Tubulin001	2	1.34649		DI Islets High glucose Glu_tub-Apl-Tubulin002	2	0.651486
	DI Islets Low glucose Glu_tub-Apl-Tubulin002	1	0.669103		DI Islets High glucose Glu_tub-Apl-Tubulin003	1	2.62944
	DI Islets Low glucose Glu_tub-Apl-Tubulin002	2	1.27509		DI Islets High glucose Glu_tub-Apl-Tubulin003	2	1.28314
	DI Islets Low glucose Glu_tub-Apl-Tubulin002	3	0.95022		DI Islets High glucose Glu_tub-Apl-Tubulin003	3	1.07736
	DI Islets Low glucose Glu_tub-Apl-Tubulin003	1	0.931453		DI Islets High glucose Glu_tub-Apl-Tubulin003	4	0.809257
	DI Islets Low glucose Glu_tub-Apl-Tubulin003	2	0.72435		DI Islets High glucose Glu_tub-Apl-Tubulin004	1	0.355292
	DI Islets Low glucose Glu_tub-Apl-Tubulin004	1	0.996775		DI Islets High glucose Glu_tub-Apl-Tubulin004	2	0.95088
	DI Islets Low glucose Glu_tub-Apl-Tubulin005	1	1.01531		DI Islets High glucose Glu_tub-Apl-Tubulin004	3	0.95088
	DI Islets Low glucose Glu_tub-Apl-Tubulin005	2	0.681488		DI Islets High glucose Glu_tub-Apl-Tubulin005	1	0.591218
	DI Islets Low glucose Glu_tub-Apl-Tubulin005	3	0.432482		DI Islets High glucose Glu_tub-Apl-Tubulin005	2	0.625546
	DI Islets Low glucose Glu_tub-Apl-Tubulin005	4	1.01372		DI Islets High glucose Glu_tub-Apl-Tubulin006	1	0.936602
	DI Islets Low glucose Glu_tub-Apl-Tubulin005	5	0.990615		DI Islets High glucose Glu_tub-Apl-Tubulin006	2	1.04216
	DI Islets Low glucose Glu_tub-Apl-Tubulin006	1	0.382458		DI Islets High glucose Glu_tub-Apl-Tubulin006	3	1.0118
	DI Islets Low glucose Glu_tub-Apl-Tubulin006	2	0.558802		DI Islets High glucose Glu_tub-Apl-Tubulin006	4	0.835416
	DI Islets Low glucose Glu_tub-Apl-Tubulin006	3	1.13017		DI Islets High glucose Glu_tub-Apl-Tubulin007	1	0.648548
	DI Islets Low glucose Glu_tub-Apl-Tubulin006	4	0.902559		DI Islets High glucose Glu_tub-Apl-Tubulin007	2	0.598057
	7DI Islets Low glucose Glu_tub-Apl-Tubulin007	1	0.669125		DI Islets High glucose Glu_tub-Apl-Tubulin007	3	0.536694
	7DI Islets Low glucose Glu_tub-Apl-Tubulin007	2	0.763438		DI Islets High glucose Glu_tub-Apl-Tubulin008	1	0.399967
	7DI Islets Low glucose Glu_tub-Apl-Tubulin008	1	0.569278		DI Islets High glucose Glu_tub-Apl-Tubulin008	2	0.856854
	7DI Islets Low glucose Glu_tub-Apl-Tubulin008	2	0.34187		DI Islets High glucose Glu_tub-Apl-Tubulin009	1	0.410781
	7DI Islets Low glucose Glu_tub-Apl-Tubulin009	1	0.169486

## Sheet: Figure 1-figure supplement 1A,B
			Low Glucose						High Glucose
Date Imaged	Image	Cell #	Average Intensity- Tubulin	Background Average Intensity- Tubulin	Average Intensity with background subtracted- Tubulin	Date Imaged	Image	Cell #	Average Intensity- Tubulin	Background Average Intensity- Tubulin	Average Intensity with background subtracted- Tubulin
2020-02-03	DI Islets Low glucose Glu_tub-Apl-Tub	1	579.677	112.75	466.927	2020-02-18	DI Islets Low glucose Glu_tub-Apl-Tubulin	1	791.971	52.666	739.305
	DI Islets Low glucose Glu_tub-Apl-Tub001	1	628.596	52.778	575.818		DI Islets Low glucose Glu_tub-Apl-Tubulin001	1	371.007	56.374	314.633
	DI Islets Low glucose Glu_tub-Apl-Tub001	2	638.049	52.778	585.271		DI Islets Low glucose Glu_tub-Apl-Tubulin001	2	398.189	56.374	341.815
	DI Islets Low glucose Glu_tub-Apl-Tub002	1	377.611	50.71	326.901		DI Islets Low glucose Glu_tub-Apl-Tubulin002	1	882.804	68.506	814.298
	DI Islets Low glucose Glu_tub-Apl-Tub004	1	676.122	62.445	613.677		DI Islets Low glucose Glu_tub-Apl-Tubulin002	2	629.209	68.506	560.703
	DI Islets Low glucose Glu_tub-Apl-Tub004	2	728.193	62.445	665.748		DI Islets Low glucose Glu_tub-Apl-Tubulin004	1	591.319	58.29	533.029
	DI Islets Low glucose Glu_tub-Apl-Tub005	1	1313.4	58.449	1254.95		DI Islets Low glucose Glu_tub-Apl-Tubulin004	2	531.134	58.29	472.844
	DI Islets Low glucose Glu_tub-Apl-Tub005	2	1100.7	58.449	1042.26		DI Islets Low glucose Glu_tub-Apl-Tubulin004	3	443.885	58.29	385.595
	DI Islets Low glucose Glu_tub-Apl-Tub006	1	392.716	51.422	341.294		DI Islets Low glucose Glu_tub-Apl-Tubulin005	1	212.44	50.73	161.71
	DI Islets Low glucose Glu_tub-Apl-Tub007	1	559.922	52.299	507.623		DI Islets Low glucose Glu_tub-Apl-Tubulin005	2	180.588	50.73	129.858
	DI Islets Low glucose Glu_tub-Apl-Tub008	2	499.593	55.734	443.859		DI Islets Low glucose Glu_tub-Apl-Tubulin006	1	1085.2	246.49	838.712
	DI Islets Low glucose Glu_tub-Apl-Tub009	1	466.596	51.379	415.217		DI Islets Low glucose Glu_tub-Apl-Tubulin006	2	1248.65	246.49	1002.16
2020-02-18	DI Islets Low glucose Glu_tub-Apl-Tubulin	1	416.696	69.327	347.369		DI Islets Low glucose Glu_tub-Apl-Tubulin006	3	720.156	246.49	473.666
	DI Islets Low glucose Glu_tub-Apl-Tubulin001	1	305.557	57.722	247.835		DI Islets Low glucose Glu_tub-Apl-Tubulin007	1	838.32	50.423	787.897
	DI Islets Low glucose Glu_tub-Apl-Tubulin002	1	255.848	53.887	201.961		DI Islets Low glucose Glu_tub-Apl-Tubulin007	2	405.353	50.423	354.93
	DI Islets Low glucose Glu_tub-Apl-Tubulin003	1	370.161	62.672	307.489		DI Islets Low glucose Glu_tub-Apl-Tubulin008	1	536.975	51.958	485.017
	DI Islets Low glucose Glu_tub-Apl-Tubulin006	1	292.061	52.079	239.982		DI Islets Low glucose Glu_tub-Apl-Tubulin008	2	458.136	51.958	406.178
	DI Islets Low glucose Glu_tub-Apl-Tubulin006	2	307.838	52.079	255.759		DI Islets Low glucose Glu_tub-Apl-Tubulin009	1	686.171	113.69	572.481
	DI Islets Low glucose Glu_tub-Apl-Tubulin007	1	311.386	56.16	255.226		DI Islets Low glucose Glu_tub-Apl-Tubulin009	2	594.11	113.69	480.42
	DI Islets Low glucose Glu_tub-Apl-Tubulin007	2	260.221	56.16	204.061		DI Islets Low glucose Glu_tub-Apl-Tubulin009	3	678.895	113.69	565.205
	DI Islets Low glucose Glu_tub-Apl-Tubulin008	1	149.195	49.606	99.589		DI Islets Low glucose Glu_tub-Apl-Tubulin010	2	710.797	74.203	636.594
	DI Islets Low glucose Glu_tub-Apl-Tubulin008	2	128.872	50.428	78.444		DI Islets Low glucose Glu_tub-Apl-Tubulin010	3	1095.2	74.203	1021
	DI Islets Low glucose Glu_tub-Apl-Tubulin009	1	530.333	53.373	476.96		DI Islets Low glucose Glu_tub-Apl-Tubulin010	4	958.344	74.203	884.141
	DI Islets Low glucose Glu_tub-Apl-Tubulin010	1	535.886	87.138	448.748		DI Islets Low glucose Glu_tub-Apl-Tubulin010	5	852.941	74.203	778.738
	DI Islets Low glucose Glu_tub-Apl-Tubulin010	2	529.997	87.138	442.859		DI Islets Low glucose Glu_tub-Apl-Tubulin010	6	720.327	74.203	646.124
	DI Islets Low glucose Glu_tub-Apl-Tubulin010	3	736.563	87.138	649.425		DI Islets Low glucose Glu_tub-Apl-Tubulin010	7	681.554	74.203	607.351
	DI Islets Low glucose Glu_tub-Apl-Tubulin011	1	450.976	93.173	357.803		DI Islets Low glucose Glu_tub-Apl-Tubulin011	1	378.539	62.399	316.14
	DI Islets Low glucose Glu_tub-Apl-Tubulin011	2	645.805	93.173	552.632		DI Islets Low glucose Glu_tub-Apl-Tubulin011	2	632.697	62.399	570.298
	DI Islets Low glucose Glu_tub-Apl-Tubulin011	3	803.13	93.173	709.957		DI Islets Low glucose Glu_tub-Apl-Tubulin012	1	629.231	232.382	396.849
	DI Islets Low glucose Glu_tub-Apl-Tubulin012	1	1887.54	55.596	1831.95		DI Islets Low glucose Glu_tub-Apl-Tubulin012	2	590.953	232.382	358.571
	DI Islets Low glucose Glu_tub-Apl-Tubulin012	2	777.174	55.596	721.578		DI Islets Low glucose Glu_tub-Apl-Tubulin013	1	648.764	66.701	582.063
	DI Islets Low glucose Glu_tub-Apl-Tubulin012	3	779.799	55.596	724.203		DI Islets Low glucose Glu_tub-Apl-Tubulin013	2	718.917	66.701	652.216
	DI Islets Low glucose Glu_tub-Apl-Tubulin012	4	735.092	55.596	679.496		DI Islets Low glucose Glu_tub-Apl-Tubulin013	3	736.272	66.701	669.571
	DI Islets Low glucose Glu_tub-Apl-Tubulin013	1	280.019	56.613	223.406		DI Islets Low glucose Glu_tub-Apl-Tubulin014	1	468.56	60.796	407.764
	DI Islets Low glucose Glu_tub-Apl-Tubulin013	2	288.731	56.613	232.118		DI Islets Low glucose Glu_tub-Apl-Tubulin014	2	566.544	60.796	505.748
	DI Islets Low glucose Glu_tub-Apl-Tubulin013	3	218.013	56.613	161.4		DI Islets Low glucose Glu_tub-Apl-Tubulin015	2	558.868	84.721	474.147
	DI Islets Low glucose Glu_tub-Apl-Tubulin014	1	419.863	51.444	368.419		DI Islets Low glucose Glu_tub-Apl-Tubulin016	1	326.486	53.127	273.359
	DI Islets Low glucose Glu_tub-Apl-Tubulin015	1	390.566	49.582	340.984		DI Islets Low glucose Glu_tub-Apl-Tubulin016	3	264.261	53.127	211.134
	DI Islets Low glucose Glu_tub-Apl-Tubulin016	1	256.125	55.432	200.693		DI Islets Low glucose Glu_tub-Apl-Tubulin017	2	986.225	63.154	923.071
	DI Islets Low glucose Glu_tub-Apl-Tubulin016	2	162.292	55.432	106.86		DI Islets Low glucose Glu_tub-Apl-Tubulin017	3	1183.2	63.154	1120.05
	DI Islets Low glucose Glu_tub-Apl-Tubulin017	1	543.179	56.491	486.688		DI Islets Low glucose Glu_tub-Apl-Tubulin018	1	592.604	76.256	516.348
	DI Islets Low glucose Glu_tub-Apl-Tubulin017	2	334.33	56.491	277.839		DI Islets Low glucose Glu_tub-Apl-Tubulin019	1	1009.23	55.288	953.939
	DI Islets Low glucose Glu_tub-Apl-Tubulin018	1	666.214	51.762	614.452		DI Islets Low glucose Glu_tub-Apl-Tubulin019	2	1048.56	55.288	993.275
	DI Islets Low glucose Glu_tub-Apl-Tubulin018	2	663.767	51.762	612.005	2020-01-23	DI Islets Low glucose Glu_tub-Apl-Tubulin	1	614.104	52.783	561.321
	DI Islets Low glucose Glu_tub-Apl-Tubulin018	3	538.736	51.762	486.974		DI Islets Low glucose Glu_tub-Apl-Tubulin	2	785.572	52.783	732.789
	DI Islets Low glucose Glu_tub-Apl-Tubulin018	4	494.214	51.762	442.452		DI Islets Low glucose Glu_tub-Apl-Tubulin	3	568.678	52.783	515.895
	DI Islets Low glucose Glu_tub-Apl-Tubulin018	5	434.169	51.762	382.407		DI Islets Low glucose Glu_tub-Apl-Tubulin	4	552.11	52.783	499.327
	DI Islets Low glucose Glu_tub-Apl-Tubulin018	6	310.893	51.762	259.131		DI Islets Low glucose Glu_tub-Apl-Tubulin001	1	221.348	53.014	168.334
	DI Islets Low glucose Glu_tub-Apl-Tubulin018	7	390.938	51.762	339.176		DI Islets Low glucose Glu_tub-Apl-Tubulin001	2	778.534	53.014	725.52
	DI Islets Low glucose Glu_tub-Apl-Tubulin019	1	266.993	61.242	205.751		DI Islets Low glucose Glu_tub-Apl-Tubulin002	1	765.09	51.805	713.285
	DI Islets Low glucose Glu_tub-Apl-Tubulin	2	329.875	61.242	268.633		DI Islets Low glucose Glu_tub-Apl-Tubulin002	2	581.352	51.805	529.547
2020-02-21	DI Islets Low glucose Glu_tub-Apl-Tubulin	1	773.05	54.358	718.692		DI Islets Low glucose Glu_tub-Apl-Tubulin002	3	552.856	51.805	501.051
	DI Islets Low glucose Glu_tub-Apl-Tubulin	2	512.453	54.358	458.095		DI Islets Low glucose Glu_tub-Apl-Tubulin003	1	743.958	52.017	691.941
	DI Islets Low glucose Glu_tub-Apl-Tubulin001	1	423.225	58.011	365.214		DI Islets Low glucose Glu_tub-Apl-Tubulin003	2	369.194	52.017	317.177
	DI Islets Low glucose Glu_tub-Apl-Tubulin001	2	195.335	58.011	137.324		DI Islets Low glucose Glu_tub-Apl-Tubulin004	1	236.782	60.428	176.354
	DI Islets Low glucose Glu_tub-Apl-Tubulin002	1	908.081	52.38	855.701		DI Islets Low glucose Glu_tub-Apl-Tubulin004	3	229.574	60.428	169.146
	DI Islets Low glucose Glu_tub-Apl-Tubulin003	1	467.109	33.329	433.78		DI Islets Low glucose Glu_tub-Apl-Tubulin004	3	551.974	60.428	491.546
	DI Islets Low glucose Glu_tub-Apl-Tubulin004	1	671.604	53.456	618.148		DI Islets Low glucose Glu_tub-Apl-Tubulin004	4	570.684	60.428	510.256
	DI Islets Low glucose Glu_tub-Apl-Tubulin004	2	655.719	53.456	602.263		DI Islets Low glucose Glu_tub-Apl-Tubulin005	1	594.222	53.364	540.858
	DI Islets Low glucose Glu_tub-Apl-Tubulin004	3	662.106	53.456	608.65		DI Islets Low glucose Glu_tub-Apl-Tubulin005	2	597.44	53.364	544.076
	DI Islets Low glucose Glu_tub-Apl-Tubulin005	1	817.743	54.921	762.822		DI Islets Low glucose Glu_tub-Apl-Tubulin005	3	547.136	53.364	493.772
	DI Islets Low glucose Glu_tub-Apl-Tubulin005	2	778.698	54.921	723.777		DI Islets Low glucose Glu_tub-Apl-Tubulin006	1	792.53	52.975	739.555
	DI Islets Low glucose Glu_tub-Apl-Tubulin006	1	715.941	60.79	655.151		DI Islets Low glucose Glu_tub-Apl-Tubulin006	2	597.73	52.975	544.755
	DI Islets Low glucose Glu_tub-Apl-Tubulin006	2	1234.29	60.79	1173.5		DI Islets Low glucose Glu_tub-Apl-Tubulin007	1	737.76	53.822	683.938
	DI Islets Low glucose Glu_tub-Apl-Tubulin007	1	476.019	55.392	420.627		DI Islets Low glucose Glu_tub-Apl-Tubulin007	2	538.63	53.822	484.808
	DI Islets Low glucose Glu_tub-Apl-Tubulin008	1	830.538	60.854	769.684		DI Islets Low glucose Glu_tub-Apl-Tubulin007	3	937.764	53.822	883.942
	DI Islets Low glucose Glu_tub-Apl-Tubulin008	2	638.742	60.854	577.888		DI Islets Low glucose Glu_tub-Apl-Tubulin007	4	540.938	53.822	487.116
	DI Islets Low glucose Glu_tub-Apl-Tubulin009	1	186.603	52.606	133.997		DI Islets Low glucose Glu_tub-Apl-Tubulin008	1	373.328	53.241	320.087
	DI Islets Low glucose Glu_tub-Apl-Tubulin009	2	173.283	52.606	120.677		DI Islets Low glucose Glu_tub-Apl-Tubulin008	3	565.566	53.241	512.325
	DI Islets Low glucose Glu_tub-Apl-Tubulin011	1	594.702	55.46	539.242		DI Islets Low glucose Glu_tub-Apl-Tubulin009	1	2436.06	853.157	1582.91
	DI Islets Low glucose Glu_tub-Apl-Tubulin011	2	499.256	55.46	443.796		DI Islets Low glucose Glu_tub-Apl-Tubulin009	2	2684.68	853.157	1831.53
	DI Islets Low glucose Glu_tub-Apl-Tubulin011	3	529.804	55.46	474.344		DI Islets Low glucose Glu_tub-Apl-Tubulin010	1	744.026	52.668	691.358
	DI Islets Low glucose Glu_tub-Apl-Tubulin012	1	535.209	53.142	482.067		DI Islets Low glucose Glu_tub-Apl-Tubulin011	1	1068.71	54.665	1014.05
	DI Islets Low glucose Glu_tub-Apl-Tubulin012	2	417.03	53.142	363.888		DI Islets Low glucose Glu_tub-Apl-Tubulin011	2	695.664	54.665	640.999
	DI Islets Low glucose Glu_tub-Apl-Tubulin013	1	571.005	55.158	515.847	2020-03-02	DI Islets Low glucose Glu_tub-Apl-Tubulin	1	419.731	53.011	366.72
	DI Islets Low glucose Glu_tub-Apl-Tubulin014	1	1130.14	57.34	1072.81		DI Islets Low glucose Glu_tub-Apl-Tubulin	2	319.207	53.011	266.196
	DI Islets Low glucose Glu_tub-Apl-Tubulin014	2	561.621	57.34	504.281		DI Islets Low glucose Glu_tub-Apl-Tubulin001	1	168.723	52.561	116.162
	DI Islets Low glucose Glu_tub-Apl-Tubulin014	3	582.813	57.34	525.473		DI Islets Low glucose Glu_tub-Apl-Tubulin001	2	168.122	52.561	115.561
	DI Islets Low glucose Glu_tub-Apl-Tubulin015	1	628.389	54.294	574.095		DI Islets Low glucose Glu_tub-Apl-Tubulin001	3	117.206	52.561	64.645
	DI Islets Low glucose Glu_tub-Apl-Tubulin016	1	274.149	60.909	213.24		DI Islets Low glucose Glu_tub-Apl-Tubulin001	4	112.837	52.561	60.276
	DI Islets Low glucose Glu_tub-Apl-Tubulin016	2	292.664	60.909	231.755		DI Islets Low glucose Glu_tub-Apl-Tubulin002	1	479.66	52.028	427.632
	DI Islets Low glucose Glu_tub-Apl-Tubulin016	3	324.655	60.909	263.746		DI Islets Low glucose Glu_tub-Apl-Tubulin002	2	545.652	52.028	493.624
	DI Islets Low glucose Glu_tub-Apl-Tubulin017	1	413.561	54.04	359.521		DI Islets Low glucose Glu_tub-Apl-Tubulin002	3	206.92	52.028	154.892
	DI Islets Low glucose Glu_tub-Apl-Tubulin017	2	438.991	54.04	384.951		DI Islets Low glucose Glu_tub-Apl-Tubulin003	1	1882.18	54.381	1827.79
	DI Islets Low glucose Glu_tub-Apl-Tubulin018	1	930.468	53.176	877.292		DI Islets Low glucose Glu_tub-Apl-Tubulin003	2	1257.36	54.381	1202.98
	DI Islets Low glucose Glu_tub-Apl-Tubulin018	2	757.947	53.176	704.771		DI Islets Low glucose Glu_tub-Apl-Tubulin004	1	470.544	51.73	418.814
	DI Islets Low glucose Glu_tub-Apl-Tubulin019	1	820.368	54.627	765.741		DI Islets Low glucose Glu_tub-Apl-Tubulin004	2	314.34	51.73	262.61
	DI Islets Low glucose Glu_tub-Apl-Tubulin019	2	824.157	54.627	769.53		DI Islets Low glucose Glu_tub-Apl-Tubulin005	1	470.544	51.816	418.728
	DI Islets Low glucose Glu_tub-Apl-Tubulin019	3	1366.93	54.627	1312.31		DI Islets Low glucose Glu_tub-Apl-Tubulin005	2	314.34	51.816	262.524
	DI Islets Low glucose Glu_tub-Apl-Tubulin020	1	887.655	53.504	834.151		DI Islets Low glucose Glu_tub-Apl-Tubulin005	3	85.967	51.816	34.151
	DI Islets Low glucose Glu_tub-Apl-Tubulin021	1	588.012	56.702	531.31		DI Islets Low glucose Glu_tub-Apl-Tubulin006	1	337.844	51.811	286.033
	DI Islets Low glucose Glu_tub-Apl-Tubulin021	2	694.719	56.702	638.017		DI Islets Low glucose Glu_tub-Apl-Tubulin006	2	319.272	51.811	267.461
	DI Islets Low glucose Glu_tub-Apl-Tubulin021	3	857.151	56.702	800.449		DI Islets Low glucose Glu_tub-Apl-Tubulin006	3	284.42	51.811	232.609
	DI Islets Low glucose Glu_tub-Apl-Tubulin024	1	281.196	54.182	227.014		DI Islets Low glucose Glu_tub-Apl-Tubulin007	1	164.365	51.859	112.506
	DI Islets Low glucose Glu_tub-Apl-Tubulin024	2	269.421	54.182	215.239		DI Islets Low glucose Glu_tub-Apl-Tubulin007	2	131.322	51.859	79.463
	DI Islets Low glucose Glu_tub-Apl-Tubulin026	1	217.044	53.341	163.703		DI Islets Low glucose Glu_tub-Apl-Tubulin008	1	514.824	51.549	463.275
	DI Islets Low glucose Glu_tub-Apl-Tubulin027	1	174.294	52.227	122.067		DI Islets Low glucose Glu_tub-Apl-Tubulin008	2	460.32	51.549	408.771
	DI Islets Low glucose Glu_tub-Apl-Tubulin028	1	260.529	53.361	207.168		DI Islets Low glucose Glu_tub-Apl-Tubulin009	1	491.204	51.085	440.119
	DI Islets Low glucose Glu_tub-Apl-Tubulin030	1	400.878	54.963	345.915		DI Islets Low glucose Glu_tub-Apl-Tubulin009	2	609.88	51.085	558.795
	DI Islets Low glucose Glu_tub-Apl-Tubulin031	1	611.424	52.402	559.022		DI Islets Low glucose Glu_tub-Apl-Tubulin009	3	638.096	51.085	587.011
	DI Islets Low glucose Glu_tub-Apl-Tubulin031	2	474.669	52.402	422.267		DI Islets Low glucose Glu_tub-Apl-Tubulin009	4	680.232	51.085	629.147

## Sheet: Figure 1-figure supplement 1C
		Low Glucose				High Glucose
Date Imaged	Image	Cell #	Normalized to mean- Tubulin	Date Imaged	Image	Cell #	Normalized to mean- Tubulin
2020-02-03	DI Islets Low glucose Glu_tub-Apl-Tub	1	0.949588	2020-02-18	DI Islets Low glucose Glu_tub-Apl-Tubulin	1	1.36316
	DI Islets Low glucose Glu_tub-Apl-Tub001	1	1.17104		DI Islets Low glucose Glu_tub-Apl-Tubulin001	1	0.580133
	DI Islets Low glucose Glu_tub-Apl-Tub001	2	1.19026		DI Islets Low glucose Glu_tub-Apl-Tubulin001	2	0.630252
	DI Islets Low glucose Glu_tub-Apl-Tub002	1	0.664817		DI Islets Low glucose Glu_tub-Apl-Tubulin002	1	1.50143
	DI Islets Low glucose Glu_tub-Apl-Tub004	1	1.24803		DI Islets Low glucose Glu_tub-Apl-Tubulin002	2	1.03385
	DI Islets Low glucose Glu_tub-Apl-Tub004	2	1.35393		DI Islets Low glucose Glu_tub-Apl-Tubulin004	1	0.98282
	DI Islets Low glucose Glu_tub-Apl-Tub005	1	2.5522		DI Islets Low glucose Glu_tub-Apl-Tubulin004	2	0.871848
	DI Islets Low glucose Glu_tub-Apl-Tub005	2	2.11963		DI Islets Low glucose Glu_tub-Apl-Tubulin004	3	0.710975
	DI Islets Low glucose Glu_tub-Apl-Tub006	1	0.694088		DI Islets Low glucose Glu_tub-Apl-Tubulin005	1	0.298167
	DI Islets Low glucose Glu_tub-Apl-Tub007	1	1.03235		DI Islets Low glucose Glu_tub-Apl-Tubulin005	2	0.239437
	DI Islets Low glucose Glu_tub-Apl-Tub008	2	0.902675		DI Islets Low glucose Glu_tub-Apl-Tubulin006	1	1.54645
	DI Islets Low glucose Glu_tub-Apl-Tub009	1	0.844425		DI Islets Low glucose Glu_tub-Apl-Tubulin006	2	1.84783
2020-02-18	DI Islets Low glucose Glu_tub-Apl-Tubulin	1	0.706443		DI Islets Low glucose Glu_tub-Apl-Tubulin006	3	0.873364
	DI Islets Low glucose Glu_tub-Apl-Tubulin001	1	0.504021		DI Islets Low glucose Glu_tub-Apl-Tubulin007	1	1.45276
	DI Islets Low glucose Glu_tub-Apl-Tubulin002	1	0.410727		DI Islets Low glucose Glu_tub-Apl-Tubulin007	2	0.654434
	DI Islets Low glucose Glu_tub-Apl-Tubulin003	1	0.625339		DI Islets Low glucose Glu_tub-Apl-Tubulin008	1	0.894293
	DI Islets Low glucose Glu_tub-Apl-Tubulin006	1	0.488051		DI Islets Low glucose Glu_tub-Apl-Tubulin008	2	0.748927
	DI Islets Low glucose Glu_tub-Apl-Tubulin006	2	0.520136		DI Islets Low glucose Glu_tub-Apl-Tubulin009	1	1.05556
	DI Islets Low glucose Glu_tub-Apl-Tubulin007	1	0.519052		DI Islets Low glucose Glu_tub-Apl-Tubulin009	2	0.885817
	DI Islets Low glucose Glu_tub-Apl-Tubulin007	2	0.414998		DI Islets Low glucose Glu_tub-Apl-Tubulin009	3	1.04215
	DI Islets Low glucose Glu_tub-Apl-Tubulin008	1	0.202534		DI Islets Low glucose Glu_tub-Apl-Tubulin010	2	1.17378
	DI Islets Low glucose Glu_tub-Apl-Tubulin008	2	0.159531		DI Islets Low glucose Glu_tub-Apl-Tubulin010	3	1.88256
	DI Islets Low glucose Glu_tub-Apl-Tubulin009	1	0.969992		DI Islets Low glucose Glu_tub-Apl-Tubulin010	4	1.63021
	DI Islets Low glucose Glu_tub-Apl-Tubulin010	1	0.912617		DI Islets Low glucose Glu_tub-Apl-Tubulin010	5	1.43587
	DI Islets Low glucose Glu_tub-Apl-Tubulin010	2	0.900641		DI Islets Low glucose Glu_tub-Apl-Tubulin010	6	1.19135
	DI Islets Low glucose Glu_tub-Apl-Tubulin010	3	1.32073		DI Islets Low glucose Glu_tub-Apl-Tubulin010	7	1.11986
	DI Islets Low glucose Glu_tub-Apl-Tubulin011	1	0.727663		DI Islets Low glucose Glu_tub-Apl-Tubulin011	1	0.582911
	DI Islets Low glucose Glu_tub-Apl-Tubulin011	2	1.12389		DI Islets Low glucose Glu_tub-Apl-Tubulin011	2	1.05154
	DI Islets Low glucose Glu_tub-Apl-Tubulin011	3	1.44384		DI Islets Low glucose Glu_tub-Apl-Tubulin012	1	0.731726
	DI Islets Low glucose Glu_tub-Apl-Tubulin012	1	3.72563		DI Islets Low glucose Glu_tub-Apl-Tubulin012	2	0.661147
	DI Islets Low glucose Glu_tub-Apl-Tubulin012	2	1.46747		DI Islets Low glucose Glu_tub-Apl-Tubulin013	1	1.07323
	DI Islets Low glucose Glu_tub-Apl-Tubulin012	3	1.47281		DI Islets Low glucose Glu_tub-Apl-Tubulin013	2	1.20258
	DI Islets Low glucose Glu_tub-Apl-Tubulin012	4	1.38189		DI Islets Low glucose Glu_tub-Apl-Tubulin013	3	1.23458
	DI Islets Low glucose Glu_tub-Apl-Tubulin013	1	0.45434		DI Islets Low glucose Glu_tub-Apl-Tubulin014	1	0.751851
	DI Islets Low glucose Glu_tub-Apl-Tubulin013	2	0.472058		DI Islets Low glucose Glu_tub-Apl-Tubulin014	2	0.932518
	DI Islets Low glucose Glu_tub-Apl-Tubulin013	3	0.328239		DI Islets Low glucose Glu_tub-Apl-Tubulin015	2	0.874251
	DI Islets Low glucose Glu_tub-Apl-Tubulin014	1	0.749252		DI Islets Low glucose Glu_tub-Apl-Tubulin016	1	0.50403
	DI Islets Low glucose Glu_tub-Apl-Tubulin015	1	0.693458		DI Islets Low glucose Glu_tub-Apl-Tubulin016	3	0.389297
	DI Islets Low glucose Glu_tub-Apl-Tubulin016	1	0.408149		DI Islets Low glucose Glu_tub-Apl-Tubulin017	2	1.70199
	DI Islets Low glucose Glu_tub-Apl-Tubulin016	2	0.217321		DI Islets Low glucose Glu_tub-Apl-Tubulin017	3	2.06519
	DI Islets Low glucose Glu_tub-Apl-Tubulin017	1	0.989776		DI Islets Low glucose Glu_tub-Apl-Tubulin018	1	0.952063
	DI Islets Low glucose Glu_tub-Apl-Tubulin017	2	0.56504		DI Islets Low glucose Glu_tub-Apl-Tubulin019	1	1.75891
	DI Islets Low glucose Glu_tub-Apl-Tubulin018	1	1.24961		DI Islets Low glucose Glu_tub-Apl-Tubulin019	2	1.83144
	DI Islets Low glucose Glu_tub-Apl-Tubulin018	2	1.24463	2020-01-23	DI Islets Low glucose Glu_tub-Apl-Tubulin	1	1.03499
	DI Islets Low glucose Glu_tub-Apl-Tubulin018	3	0.990357		DI Islets Low glucose Glu_tub-Apl-Tubulin	2	1.35115
	DI Islets Low glucose Glu_tub-Apl-Tubulin018	4	0.899813		DI Islets Low glucose Glu_tub-Apl-Tubulin	3	0.951227
	DI Islets Low glucose Glu_tub-Apl-Tubulin018	5	0.7777		DI Islets Low glucose Glu_tub-Apl-Tubulin	4	0.920679
	DI Islets Low glucose Glu_tub-Apl-Tubulin018	6	0.526994		DI Islets Low glucose Glu_tub-Apl-Tubulin001	1	0.310381
	DI Islets Low glucose Glu_tub-Apl-Tubulin018	7	0.689781		DI Islets Low glucose Glu_tub-Apl-Tubulin001	2	1.33774
	DI Islets Low glucose Glu_tub-Apl-Tubulin019	1	0.418435		DI Islets Low glucose Glu_tub-Apl-Tubulin002	1	1.31518
	DI Islets Low glucose Glu_tub-Apl-Tubulin	2	0.546318		DI Islets Low glucose Glu_tub-Apl-Tubulin002	2	0.9764
2020-02-21	DI Islets Low glucose Glu_tub-Apl-Tubulin	1	1.4616		DI Islets Low glucose Glu_tub-Apl-Tubulin002	3	0.923858
	DI Islets Low glucose Glu_tub-Apl-Tubulin	2	0.931626		DI Islets Low glucose Glu_tub-Apl-Tubulin003	1	1.27583
	DI Islets Low glucose Glu_tub-Apl-Tubulin001	1	0.742734		DI Islets Low glucose Glu_tub-Apl-Tubulin003	2	0.584823
	DI Islets Low glucose Glu_tub-Apl-Tubulin001	2	0.279275		DI Islets Low glucose Glu_tub-Apl-Tubulin004	1	0.325168
	DI Islets Low glucose Glu_tub-Apl-Tubulin002	1	1.74024		DI Islets Low glucose Glu_tub-Apl-Tubulin004	3	0.311878
	DI Islets Low glucose Glu_tub-Apl-Tubulin003	1	0.882177		DI Islets Low glucose Glu_tub-Apl-Tubulin004	3	0.906332
	DI Islets Low glucose Glu_tub-Apl-Tubulin004	1	1.25713		DI Islets Low glucose Glu_tub-Apl-Tubulin004	4	0.94083
	DI Islets Low glucose Glu_tub-Apl-Tubulin004	2	1.22482		DI Islets Low glucose Glu_tub-Apl-Tubulin005	1	0.997255
	DI Islets Low glucose Glu_tub-Apl-Tubulin004	3	1.23781		DI Islets Low glucose Glu_tub-Apl-Tubulin005	2	1.00319
	DI Islets Low glucose Glu_tub-Apl-Tubulin005	1	1.55135		DI Islets Low glucose Glu_tub-Apl-Tubulin005	3	0.910436
	DI Islets Low glucose Glu_tub-Apl-Tubulin005	2	1.47194		DI Islets Low glucose Glu_tub-Apl-Tubulin006	1	1.36362
	DI Islets Low glucose Glu_tub-Apl-Tubulin006	1	1.33238		DI Islets Low glucose Glu_tub-Apl-Tubulin006	2	1.00444
	DI Islets Low glucose Glu_tub-Apl-Tubulin006	2	2.38654		DI Islets Low glucose Glu_tub-Apl-Tubulin007	1	1.26107
	DI Islets Low glucose Glu_tub-Apl-Tubulin007	1	0.855428		DI Islets Low glucose Glu_tub-Apl-Tubulin007	2	0.893908
	DI Islets Low glucose Glu_tub-Apl-Tubulin008	1	1.5653		DI Islets Low glucose Glu_tub-Apl-Tubulin007	3	1.62985
	DI Islets Low glucose Glu_tub-Apl-Tubulin008	2	1.17525		DI Islets Low glucose Glu_tub-Apl-Tubulin007	4	0.898164
	DI Islets Low glucose Glu_tub-Apl-Tubulin009	1	0.272509		DI Islets Low glucose Glu_tub-Apl-Tubulin008	1	0.590189
	DI Islets Low glucose Glu_tub-Apl-Tubulin009	2	0.24542		DI Islets Low glucose Glu_tub-Apl-Tubulin008	3	0.944645
	DI Islets Low glucose Glu_tub-Apl-Tubulin011	1	1.09665		DI Islets Low glucose Glu_tub-Apl-Tubulin009	1	2.91863
	DI Islets Low glucose Glu_tub-Apl-Tubulin011	2	0.902546		DI Islets Low glucose Glu_tub-Apl-Tubulin009	2	3.37704
	DI Islets Low glucose Glu_tub-Apl-Tubulin011	3	0.964672		DI Islets Low glucose Glu_tub-Apl-Tubulin010	1	1.27475
	DI Islets Low glucose Glu_tub-Apl-Tubulin012	1	0.980378		DI Islets Low glucose Glu_tub-Apl-Tubulin011	1	1.86974
	DI Islets Low glucose Glu_tub-Apl-Tubulin012	2	0.740038		DI Islets Low glucose Glu_tub-Apl-Tubulin011	2	1.1819
	DI Islets Low glucose Glu_tub-Apl-Tubulin013	1	1.04908	2020-03-02	DI Islets Low glucose Glu_tub-Apl-Tubulin	1	0.676173
	DI Islets Low glucose Glu_tub-Apl-Tubulin014	1	2.18176		DI Islets Low glucose Glu_tub-Apl-Tubulin	2	0.490823
	DI Islets Low glucose Glu_tub-Apl-Tubulin014	2	1.02555		DI Islets Low glucose Glu_tub-Apl-Tubulin001	1	0.214184
	DI Islets Low glucose Glu_tub-Apl-Tubulin014	3	1.06865		DI Islets Low glucose Glu_tub-Apl-Tubulin001	2	0.213076
	DI Islets Low glucose Glu_tub-Apl-Tubulin015	1	1.16754		DI Islets Low glucose Glu_tub-Apl-Tubulin001	3	0.119195
	DI Islets Low glucose Glu_tub-Apl-Tubulin016	1	0.433665		DI Islets Low glucose Glu_tub-Apl-Tubulin001	4	0.111139
	DI Islets Low glucose Glu_tub-Apl-Tubulin016	2	0.471319		DI Islets Low glucose Glu_tub-Apl-Tubulin002	1	0.788485
	DI Islets Low glucose Glu_tub-Apl-Tubulin016	3	0.536379		DI Islets Low glucose Glu_tub-Apl-Tubulin002	2	0.910163
	DI Islets Low glucose Glu_tub-Apl-Tubulin017	1	0.731157		DI Islets Low glucose Glu_tub-Apl-Tubulin002	3	0.285596
	DI Islets Low glucose Glu_tub-Apl-Tubulin017	2	0.782874		DI Islets Low glucose Glu_tub-Apl-Tubulin003	1	3.37016
	DI Islets Low glucose Glu_tub-Apl-Tubulin018	1	1.78415		DI Islets Low glucose Glu_tub-Apl-Tubulin003	2	2.2181
	DI Islets Low glucose Glu_tub-Apl-Tubulin018	2	1.43329		DI Islets Low glucose Glu_tub-Apl-Tubulin004	1	0.772226
	DI Islets Low glucose Glu_tub-Apl-Tubulin019	1	1.55728		DI Islets Low glucose Glu_tub-Apl-Tubulin004	2	0.484211
	DI Islets Low glucose Glu_tub-Apl-Tubulin019	2	1.56499		DI Islets Low glucose Glu_tub-Apl-Tubulin005	1	0.772067
	DI Islets Low glucose Glu_tub-Apl-Tubulin019	3	2.66883		DI Islets Low glucose Glu_tub-Apl-Tubulin005	2	0.484052
	DI Islets Low glucose Glu_tub-Apl-Tubulin020	1	1.69641		DI Islets Low glucose Glu_tub-Apl-Tubulin005	3	0.062969
	DI Islets Low glucose Glu_tub-Apl-Tubulin021	1	1.08052		DI Islets Low glucose Glu_tub-Apl-Tubulin006	1	0.527399
	DI Islets Low glucose Glu_tub-Apl-Tubulin021	2	1.29753		DI Islets Low glucose Glu_tub-Apl-Tubulin006	2	0.493155
	DI Islets Low glucose Glu_tub-Apl-Tubulin021	3	1.62787		DI Islets Low glucose Glu_tub-Apl-Tubulin006	3	0.428894
	DI Islets Low glucose Glu_tub-Apl-Tubulin024	1	0.461678		DI Islets Low glucose Glu_tub-Apl-Tubulin007	1	0.207443
	DI Islets Low glucose Glu_tub-Apl-Tubulin024	2	0.437731		DI Islets Low glucose Glu_tub-Apl-Tubulin007	2	0.146517
	DI Islets Low glucose Glu_tub-Apl-Tubulin026	1	0.332922		DI Islets Low glucose Glu_tub-Apl-Tubulin008	1	0.854205
	DI Islets Low glucose Glu_tub-Apl-Tubulin027	1	0.248247		DI Islets Low glucose Glu_tub-Apl-Tubulin008	2	0.753708
	DI Islets Low glucose Glu_tub-Apl-Tubulin028	1	0.421317		DI Islets Low glucose Glu_tub-Apl-Tubulin009	1	0.811509
	DI Islets Low glucose Glu_tub-Apl-Tubulin030	1	0.703486		DI Islets Low glucose Glu_tub-Apl-Tubulin009	2	1.03033
	DI Islets Low glucose Glu_tub-Apl-Tubulin031	1	1.13688		DI Islets Low glucose Glu_tub-Apl-Tubulin009	3	1.08235
	DI Islets Low glucose Glu_tub-Apl-Tubulin031	2	0.858763		DI Islets Low glucose Glu_tub-Apl-Tubulin009	4	1.16005

## Sheet: Figure 1-figure supplement 1F,G
			Low Glucose						High Glucose
Date Imaged	Image	Cell #	Average Intensity- Glu-tubulin	Background Average Intensity- Glu-tubulin	Average Intensity with background subtracted- Glu-tubulin	Date Imaged	Image	Cell #	Average Intensity- Glu-tubulin	Background Average Intensity- Glu-tubulin	Average Intensity with background subtracted- Glu-tubulin
3/2/2020 Repeat 1	DI Islets Low glucose Glu_tub-Apl-Tubulin	1	229.299	38.145	191.154	3-2-20 Repeat 1	DI Islets High glucose Glu_tub-Apl-Tubulin	1	115.077	37.297	77.78
	DI Islets Low glucose Glu_tub-Apl-Tubulin	2	276.442	38.145	238.297		DI Islets High glucose Glu_tub-Apl-Tubulin	2	133.796	37.297	96.499
	DI Islets Low glucose Glu_tub-Apl-Tubulin	3	306.93	38.145	268.785		DI Islets High glucose Glu_tub-Apl-Tubulin001	1	353.114	36.701	316.413
	DI Islets Low glucose Glu_tub-Apl-Tubulin	4	242.327	38.145	204.182		DI Islets High glucose Glu_tub-Apl-Tubulin001	2	318.437	36.701	281.736
	DI Islets Low glucose Glu_tub-Apl-Tubulin001	1	276.423	37.606	238.817		DI Islets High glucose Glu_tub-Apl-Tubulin001	3	94.332	36.701	57.631
	DI Islets Low glucose Glu_tub-Apl-Tubulin001	2	246.639	37.606	209.033		DI Islets High glucose Glu_tub-Apl-Tubulin002	1	480.264	134.286	345.978
	DI Islets Low glucose Glu_tub-Apl-Tubulin002	1	332.292	39.514	292.778		DI Islets High glucose Glu_tub-Apl-Tubulin002	2	383.976	134.286	249.69
	DI Islets Low glucose Glu_tub-Apl-Tubulin002	2	328.008	39.514	288.494		DI Islets High glucose Glu_tub-Apl-Tubulin003	1	249.438	61.62	187.818
	DI Islets Low glucose Glu_tub-Apl-Tubulin003	1	715.554	67.673	647.881		DI Islets High glucose Glu_tub-Apl-Tubulin003	2	330.029	61.62	268.409
	DI Islets Low glucose Glu_tub-Apl-Tubulin003	2	376.804	67.673	309.131		DI Islets High glucose Glu_tub-Apl-Tubulin003	3	285.594	61.62	223.974
	DI Islets Low glucose Glu_tub-Apl-Tubulin004	1	771.484	273.432	498.052		DI Islets High glucose Glu_tub-Apl-Tubulin004	1	217.067	82.528	134.539
	DI Islets Low glucose Glu_tub-Apl-Tubulin004	2	434.129	273.432	160.697		DI Islets High glucose Glu_tub-Apl-Tubulin004	2	314.348	82.528	231.82
	DI Islets Low glucose Glu_tub-Apl-Tubulin004	3	798.931	273.432	525.499		DI Islets High glucose Glu_tub-Apl-Tubulin005	1	203.474	53.29	150.184
	DI Islets Low glucose Glu_tub-Apl-Tubulin005	1	1078.13	132.153	945.976		DI Islets High glucose Glu_tub-Apl-Tubulin005	2	172.681	53.29	119.391
	DI Islets Low glucose Glu_tub-Apl-Tubulin005	2	741.597	132.153	609.444		DI Islets High glucose Glu_tub-Apl-Tubulin006	1	261.313	40.24	221.073
	DI Islets Low glucose Glu_tub-Apl-Tubulin005	3	301.384	132.153	169.231		DI Islets High glucose Glu_tub-Apl-Tubulin006	2	201.451	40.24	161.211
	DI Islets Low glucose Glu_tub-Apl-Tubulin006	1	435.24	39.974	395.266		DI Islets High glucose Glu_tub-Apl-Tubulin006	3	175.477	40.24	135.237
	DI Islets Low glucose Glu_tub-Apl-Tubulin006	2	267.377	39.974	227.403		DI Islets High glucose Glu_tub-Apl-Tubulin007	1	180.439	39.217	141.222
	DI Islets Low glucose Glu_tub-Apl-Tubulin007	1	1106.75	219.26	887.486		DI Islets High glucose Glu_tub-Apl-Tubulin007	2	322.839	39.217	283.622
	DI Islets Low glucose Glu_tub-Apl-Tubulin007	2	603.811	219.26	384.551		DI Islets High glucose Glu_tub-Apl-Tubulin008	1	347.754	38.26	309.494
	DI Islets Low glucose Glu_tub-Apl-Tubulin008	1	1019.23	393.285	625.949		DI Islets High glucose Glu_tub-Apl-Tubulin008	2	236.235	38.26	197.975
	DI Islets Low glucose Glu_tub-Apl-Tubulin008	2	1205.11	393.285	811.82		DI Islets High glucose Glu_tub-Apl-Tubulin008	3	270.686	38.26	232.426
	DI Islets Low glucose Glu_tub-Apl-Tubulin008	3	510.857	393.285	117.572		DI Islets High glucose Glu_tub-Apl-Tubulin008	4	447.834	38.26	409.574
	DI Islets Low glucose Glu_tub-Apl-Tubulin009	1	1047.48	304.524	742.956		DI Islets High glucose Glu_tub-Apl-Tubulin008	5	103.196	38.26	64.936
	DI Islets Low glucose Glu_tub-Apl-Tubulin010	1	935.083	331.738	603.345		DI Islets High glucose Glu_tub-Apl-Tubulin009	1	444.323	70.468	373.855
	DI Islets Low glucose Glu_tub-Apl-Tubulin010	2	1247.43	331.738	915.69		DI Islets High glucose Glu_tub-Apl-Tubulin009	2	210.709	70.468	140.241
	DI Islets Low glucose Glu_tub-Apl-Tubulin011	1	343.35	285.444	57.906		DI Islets High glucose Glu_tub-Apl-Tubulin010	1	441.244	66.06	375.184
	DI Islets Low glucose Glu_tub-Apl-Tubulin011	2	965.606	285.444	680.162		DI Islets High glucose Glu_tub-Apl-Tubulin010	2	416.395	66.06	350.335
	DI Islets Low glucose Glu_tub-Apl-Tubulin011	3	1067.73	285.444	782.287		DI Islets High glucose Glu_tub-Apl-Tubulin010	3	580.873	66.06	514.813
	DI Islets Low glucose Glu_tub-Apl-Tubulin011	4	904.4	285.444	618.956		DI Islets High glucose Glu_tub-Apl-Tubulin010	4	302.726	66.06	236.666
	DI Islets Low glucose Glu_tub-Apl-Tubulin013	1	312.642	149.249	163.393		DI Islets High glucose Glu_tub-Apl-Tubulin011	1	308.206	120.093	188.113
	DI Islets Low glucose Glu_tub-Apl-Tubulin013	2	398.6	149.249	249.351		DI Islets High glucose Glu_tub-Apl-Tubulin011	2	272.941	120.093	152.848
	DI Islets Low glucose Glu_tub-Apl-Tubulin014	1	620.056	193.104	426.952		DI Islets High glucose Glu_tub-Apl-Tubulin012	1	185.666	36.537	149.129
	DI Islets Low glucose Glu_tub-Apl-Tubulin014	2	460.825	193.104	267.721		DI Islets High glucose Glu_tub-Apl-Tubulin012	2	192.869	36.537	156.332
	DI Islets Low glucose Glu_tub-Apl-Tubulin014	3	1042.82	193.104	849.714		DI Islets High glucose Glu_tub-Apl-Tubulin013	1	277.172	75.106	202.066
3-2-20 Repeat 2	DI Islets Low glucose Glu_tub-Apl-Tubulin	1	1123.55	96.578	1026.97		DI Islets High glucose Glu_tub-Apl-Tubulin013	2	142.62	75.106	67.514
	DI Islets Low glucose Glu_tub-Apl-Tubulin	2	672.982	96.578	576.404		DI Islets High glucose Glu_tub-Apl-Tubulin014	1	744.143	156.871	587.272
	DI Islets Low glucose Glu_tub-Apl-Tubulin	3	372.544	96.578	275.966		DI Islets High glucose Glu_tub-Apl-Tubulin014	2	513.544	156.871	356.673
	DI Islets Low glucose Glu_tub-Apl-Tubulin001	1	1580.52	928.551	651.966		DI Islets High glucose Glu_tub-Apl-Tubulin014	3	491.114	156.871	334.243
	DI Islets Low glucose Glu_tub-Apl-Tubulin001	2	1377.43	928.551	448.883	3-2-20-2	DI Islets High glucose Glu_tub-Apl-Tubulin	1	289.504	186.965	102.539
	DI Islets Low glucose Glu_tub-Apl-Tubulin002	1	707.006	485.021	221.985		DI Islets High glucose Glu_tub-Apl-Tubulin	2	359.609	186.965	172.644
	DI Islets Low glucose Glu_tub-Apl-Tubulin002	2	659.321	485.021	174.3		DI Islets High glucose Glu_tub-Apl-Tubulin001	1	106.106	36.514	69.592
	DI Islets Low glucose Glu_tub-Apl-Tubulin003	1	615.716	212.729	402.987		DI Islets High glucose Glu_tub-Apl-Tubulin001	2	129.365	36.514	92.851
	DI Islets Low glucose Glu_tub-Apl-Tubulin003	2	514.239	212.729	301.51		DI Islets High glucose Glu_tub-Apl-Tubulin002	1	133.741	58.722	75.019
	DI Islets Low glucose Glu_tub-Apl-Tubulin004	1	1172.19	1061.78	110.414		DI Islets High glucose Glu_tub-Apl-Tubulin002	2	278.16	58.722	219.438
	DI Islets Low glucose Glu_tub-Apl-Tubulin004	2	1051.9	861.779	190.126		DI Islets High glucose Glu_tub-Apl-Tubulin002	3	410.056	58.722	351.334
	DI Islets Low glucose Glu_tub-Apl-Tubulin004	3	1120.52	1061.78	58.736		DI Islets High glucose Glu_tub-Apl-Tubulin002	4	464.037	58.722	405.315
	DI Islets Low glucose Glu_tub-Apl-Tubulin004	4	2003.02	1061.78	941.244		DI Islets High glucose Glu_tub-Apl-Tubulin002	5	138.577	58.722	79.855
	DI Islets Low glucose Glu_tub-Apl-Tubulin004	5	1777.75	1061.78	715.969		DI Islets High glucose Glu_tub-Apl-Tubulin002	6	224.893	58.722	166.171
	DI Islets Low glucose Glu_tub-Apl-Tubulin004	6	2313.74	1061.78	1251.96		DI Islets High glucose Glu_tub-Apl-Tubulin003	1	120.382	35.979	84.403
	DI Islets Low glucose Glu_tub-Apl-Tubulin005	1	617.625	168.24	449.385		DI Islets High glucose Glu_tub-Apl-Tubulin003	2	103.648	35.979	67.669
	DI Islets Low glucose Glu_tub-Apl-Tubulin005	2	326.319	168.24	158.079		DI Islets High glucose Glu_tub-Apl-Tubulin003	3	138.17	35.979	102.191
	DI Islets Low glucose Glu_tub-Apl-Tubulin006	1	590.829	318.356	272.473		DI Islets High glucose Glu_tub-Apl-Tubulin003	4	136.456	35.979	100.477
	DI Islets Low glucose Glu_tub-Apl-Tubulin006	2	549.093	318.356	230.737		DI Islets High glucose Glu_tub-Apl-Tubulin003	5	52.617	35.979	16.638
	DI Islets Low glucose Glu_tub-Apl-Tubulin006	3	583.469	318.356	265.113		DI Islets High glucose Glu_tub-Apl-Tubulin004	1	253.842	36.146	217.696
	DI Islets Low glucose Glu_tub-Apl-Tubulin007	1	592.608	346.028	246.58		DI Islets High glucose Glu_tub-Apl-Tubulin004	2	132.287	36.146	96.141
	DI Islets Low glucose Glu_tub-Apl-Tubulin007	2	691.297	346.028	345.269		DI Islets High glucose Glu_tub-Apl-Tubulin004	3	209.958	36.146	173.812
	DI Islets Low glucose Glu_tub-Apl-Tubulin007	3	699.193	346.028	353.165		DI Islets High glucose Glu_tub-Apl-Tubulin005	1	241.929	50.493	191.436
	DI Islets Low glucose Glu_tub-Apl-Tubulin008	1	551.247	232.458	318.789		DI Islets High glucose Glu_tub-Apl-Tubulin006	1	342.489	139.104	203.385
	DI Islets Low glucose Glu_tub-Apl-Tubulin008	2	891.153	232.458	658.695		DI Islets High glucose Glu_tub-Apl-Tubulin006	2	333.614	139.104	194.51
	DI Islets Low glucose Glu_tub-Apl-Tubulin008	3	752.45	232.458	519.992		DI Islets High glucose Glu_tub-Apl-Tubulin007	1	542.815	103.125	439.69
	DI Islets Low glucose Glu_tub-Apl-Tubulin009	1	476.269	258.194	218.075		DI Islets High glucose Glu_tub-Apl-Tubulin007	2	425.305	103.125	322.18
	DI Islets Low glucose Glu_tub-Apl-Tubulin009	2	578.611	258.194	320.417		DI Islets High glucose Glu_tub-Apl-Tubulin008	1	241.994	99.75	142.244
	DI Islets Low glucose Glu_tub-Apl-Tubulin010	1	2106.41	1074.52	1031.9		DI Islets High glucose Glu_tub-Apl-Tubulin008	2	466.026	99.75	366.276
	DI Islets Low glucose Glu_tub-Apl-Tubulin010	2	1850.28	1074.52	775.764		DI Islets High glucose Glu_tub-Apl-Tubulin009	1	289.002	61.167	227.835
	DI Islets Low glucose Glu_tub-Apl-Tubulin010	3	2281.9	1074.52	1207.39		DI Islets High glucose Glu_tub-Apl-Tubulin009	2	395.841	61.167	334.674
	DI Islets Low glucose Glu_tub-Apl-Tubulin010	4	1544.79	1074.52	470.279		DI Islets High glucose Glu_tub-Apl-Tubulin011	1	154.502	45.069	109.433
	DI Islets Low glucose Glu_tub-Apl-Tubulin011	1	1189.68	419.948	769.728		DI Islets High glucose Glu_tub-Apl-Tubulin011	2	207.281	45.069	162.212
	DI Islets Low glucose Glu_tub-Apl-Tubulin011	2	619.128	419.948	199.18		DI Islets High glucose Glu_tub-Apl-Tubulin012	1	186.036	48.181	137.855
	DI Islets Low glucose Glu_tub-Apl-Tubulin011	3	1191.09	419.948	771.137		DI Islets High glucose Glu_tub-Apl-Tubulin012	2	189.472	48.181	141.291
	DI Islets Low glucose Glu_tub-Apl-Tubulin011	4	1212.4	419.948	792.448		DI Islets High glucose Glu_tub-Apl-Tubulin013	1	154.152	36.674	117.478
	DI Islets Low glucose Glu_tub-Apl-Tubulin012	1	1319.51	1053.19	266.327		DI Islets High glucose Glu_tub-Apl-Tubulin013	2	158.621	36.674	121.947
	DI Islets Low glucose Glu_tub-Apl-Tubulin012	2	1548.62	1053.19	495.433		DI Islets High glucose Glu_tub-Apl-Tubulin014	1	208.056	37.153	170.903
	DI Islets Low glucose Glu_tub-Apl-Tubulin013	1	857.446	317.007	540.439		DI Islets High glucose Glu_tub-Apl-Tubulin014	2	200.68	37.153	163.527
	DI Islets Low glucose Glu_tub-Apl-Tubulin013	2	761.048	317.007	444.041	2020-02-19	DI Islets High glucose Glu_tub-Apl-Tubulin	1	366.317	84.693	281.624
	DI Islets Low glucose Glu_tub-Apl-Tubulin014	1	604.383	313.514	290.869		DI Islets High glucose Glu_tub-Apl-Tubulin	2	523.601	84.693	438.908
	DI Islets Low glucose Glu_tub-Apl-Tubulin014	2	599.352	313.514	285.838		DI Islets High glucose Glu_tub-Apl-Tubulin	3	235.694	84.693	151.001
2020-02-19	DI Islets Low glucose Glu_tub-Apl-Tubulin	1	711.091	73.647	637.444		DI Islets High glucose Glu_tub-Apl-Tubulin001	1	341.081	141.509	199.572
	DI Islets Low glucose Glu_tub-Apl-Tubulin	2	1214.22	73.647	1140.57		DI Islets High glucose Glu_tub-Apl-Tubulin001	2	307.618	141.509	166.109
	DI Islets Low glucose Glu_tub-Apl-Tubulin001	1	1161.97	380.317	781.654		DI Islets High glucose Glu_tub-Apl-Tubulin002	1	200.803	83.765	117.038
	DI Islets Low glucose Glu_tub-Apl-Tubulin001	2	1104.57	380.317	724.248		DI Islets High glucose Glu_tub-Apl-Tubulin002	2	202.137	83.765	118.372
	DI Islets Low glucose Glu_tub-Apl-Tubulin002	1	726.666	443.123	283.543		DI Islets High glucose Glu_tub-Apl-Tubulin003	1	872.067	107.971	764.096
	DI Islets Low glucose Glu_tub-Apl-Tubulin002	2	1165.04	443.123	721.916		DI Islets High glucose Glu_tub-Apl-Tubulin003	2	406.289	107.971	298.318
	DI Islets Low glucose Glu_tub-Apl-Tubulin002	3	826.926	443.123	383.803		DI Islets High glucose Glu_tub-Apl-Tubulin003	3	343.231	107.971	235.26
	DI Islets Low glucose Glu_tub-Apl-Tubulin003	1	525.637	80.699	444.938		DI Islets High glucose Glu_tub-Apl-Tubulin003	4	289.557	107.971	181.586
	DI Islets Low glucose Glu_tub-Apl-Tubulin003	2	496.074	80.699	415.375		DI Islets High glucose Glu_tub-Apl-Tubulin004	1	182.611	42.886	139.725
	DI Islets Low glucose Glu_tub-Apl-Tubulin004	1	479.873	249.567	230.306		DI Islets High glucose Glu_tub-Apl-Tubulin004	2	296.802	42.886	253.916
	DI Islets Low glucose Glu_tub-Apl-Tubulin005	1	675.99	158.693	517.297		DI Islets High glucose Glu_tub-Apl-Tubulin004	3	296.802	42.886	253.916
	DI Islets Low glucose Glu_tub-Apl-Tubulin005	2	528.575	158.693	369.882		DI Islets High glucose Glu_tub-Apl-Tubulin005	1	126.857	36.466	90.391
	DI Islets Low glucose Glu_tub-Apl-Tubulin005	3	367.048	158.693	208.355		DI Islets High glucose Glu_tub-Apl-Tubulin005	2	121.012	36.466	84.546
	DI Islets Low glucose Glu_tub-Apl-Tubulin005	4	541.819	158.693	383.126		DI Islets High glucose Glu_tub-Apl-Tubulin006	1	76.795	36.625	40.17
	DI Islets Low glucose Glu_tub-Apl-Tubulin005	5	559.321	158.693	400.628		DI Islets High glucose Glu_tub-Apl-Tubulin006	2	73.024	36.625	36.399
	DI Islets Low glucose Glu_tub-Apl-Tubulin006	1	518.742	131.039	387.703		DI Islets High glucose Glu_tub-Apl-Tubulin006	3	67.048	36.625	30.423
	DI Islets Low glucose Glu_tub-Apl-Tubulin006	2	572.226	131.039	441.187		DI Islets High glucose Glu_tub-Apl-Tubulin006	4	75.333	36.625	38.708
	DI Islets Low glucose Glu_tub-Apl-Tubulin006	3	622.974	131.039	491.935		DI Islets High glucose Glu_tub-Apl-Tubulin007	1	104.86	36.408	68.452
	DI Islets Low glucose Glu_tub-Apl-Tubulin006	4	534.285	131.039	403.246		DI Islets High glucose Glu_tub-Apl-Tubulin007	2	89.577	36.408	53.169
	7DI Islets Low glucose Glu_tub-Apl-Tubulin007	1	821.441	404.908	416.533		DI Islets High glucose Glu_tub-Apl-Tubulin007	3	93.29	36.408	56.882
	7DI Islets Low glucose Glu_tub-Apl-Tubulin007	2	482.726	404.908	77.818		DI Islets High glucose Glu_tub-Apl-Tubulin008	1	108.075	36.079	71.996
	7DI Islets Low glucose Glu_tub-Apl-Tubulin008	1	273.057	43.596	229.461		DI Islets High glucose Glu_tub-Apl-Tubulin008	2	130.366	36.079	94.287
	7DI Islets Low glucose Glu_tub-Apl-Tubulin008	2	242.753	43.596	199.157		DI Islets High glucose Glu_tub-Apl-Tubulin009	1	128.028	36.736	91.292
	7DI Islets Low glucose Glu_tub-Apl-Tubulin009	1	269.748	55.64	214.108

## Sheet: Figure 1-figure supplement 1H
		Low Glucose				High Glucose
Date Imaged	Image	Cell #	Normalized to mean- Glu-tubulin	Date Imaged	Image	Cell #	Normalized to mean- Glu-tubulin
3/2/2020 Repeat 1	DI Islets Low glucose Glu_tub-Apl-Tubulin	1	0.418279	3-2-20 Re peat 1	DI Islets High glucose Glu_tub-Apl-Tubulin	1	0.397227
	DI Islets Low glucose Glu_tub-Apl-Tubulin	2	0.521436		DI Islets High glucose Glu_tub-Apl-Tubulin	2	0.492826
	DI Islets Low glucose Glu_tub-Apl-Tubulin	3	0.588149		DI Islets High glucose Glu_tub-Apl-Tubulin001	1	1.61594
	DI Islets Low glucose Glu_tub-Apl-Tubulin	4	0.446787		DI Islets High glucose Glu_tub-Apl-Tubulin001	2	1.43884
	DI Islets Low glucose Glu_tub-Apl-Tubulin001	1	0.522574		DI Islets High glucose Glu_tub-Apl-Tubulin001	3	0.294325
	DI Islets Low glucose Glu_tub-Apl-Tubulin001	2	0.457401		DI Islets High glucose Glu_tub-Apl-Tubulin002	1	1.76693
	DI Islets Low glucose Glu_tub-Apl-Tubulin002	1	0.64065		DI Islets High glucose Glu_tub-Apl-Tubulin002	2	1.27518
	DI Islets Low glucose Glu_tub-Apl-Tubulin002	2	0.631276		DI Islets High glucose Glu_tub-Apl-Tubulin003	1	0.959198
	DI Islets Low glucose Glu_tub-Apl-Tubulin003	1	1.41768		DI Islets High glucose Glu_tub-Apl-Tubulin003	2	1.37078
	DI Islets Low glucose Glu_tub-Apl-Tubulin003	2	0.676434		DI Islets High glucose Glu_tub-Apl-Tubulin003	3	1.14385
	DI Islets Low glucose Glu_tub-Apl-Tubulin004	1	1.08983		DI Islets High glucose Glu_tub-Apl-Tubulin004	1	0.687099
	DI Islets Low glucose Glu_tub-Apl-Tubulin004	2	0.351634		DI Islets High glucose Glu_tub-Apl-Tubulin004	2	1.18392
	DI Islets Low glucose Glu_tub-Apl-Tubulin004	3	1.14989		DI Islets High glucose Glu_tub-Apl-Tubulin005	1	0.766999
	DI Islets Low glucose Glu_tub-Apl-Tubulin005	1	2.06996		DI Islets High glucose Glu_tub-Apl-Tubulin005	2	0.609737
	DI Islets Low glucose Glu_tub-Apl-Tubulin005	2	1.33357		DI Islets High glucose Glu_tub-Apl-Tubulin006	1	1.12903
	DI Islets Low glucose Glu_tub-Apl-Tubulin005	3	0.370308		DI Islets High glucose Glu_tub-Apl-Tubulin006	2	0.823314
	DI Islets Low glucose Glu_tub-Apl-Tubulin006	1	0.864912		DI Islets High glucose Glu_tub-Apl-Tubulin006	3	0.690664
	DI Islets Low glucose Glu_tub-Apl-Tubulin006	2	0.497598		DI Islets High glucose Glu_tub-Apl-Tubulin007	1	0.721229
	DI Islets Low glucose Glu_tub-Apl-Tubulin007	1	1.94198		DI Islets High glucose Glu_tub-Apl-Tubulin007	2	1.44847
	DI Islets Low glucose Glu_tub-Apl-Tubulin007	2	0.841466		DI Islets High glucose Glu_tub-Apl-Tubulin008	1	1.5806
	DI Islets Low glucose Glu_tub-Apl-Tubulin008	1	1.36969		DI Islets High glucose Glu_tub-Apl-Tubulin008	2	1.01107
	DI Islets Low glucose Glu_tub-Apl-Tubulin008	2	1.77641		DI Islets High glucose Glu_tub-Apl-Tubulin008	3	1.18701
	DI Islets Low glucose Glu_tub-Apl-Tubulin008	3	0.257268		DI Islets High glucose Glu_tub-Apl-Tubulin008	4	2.09172
	DI Islets Low glucose Glu_tub-Apl-Tubulin009	1	1.62572		DI Islets High glucose Glu_tub-Apl-Tubulin008	5	0.331632
	DI Islets Low glucose Glu_tub-Apl-Tubulin010	1	1.32023		DI Islets High glucose Glu_tub-Apl-Tubulin009	1	1.9093
	DI Islets Low glucose Glu_tub-Apl-Tubulin010	2	2.00369		DI Islets High glucose Glu_tub-Apl-Tubulin009	2	0.716219
	DI Islets Low glucose Glu_tub-Apl-Tubulin011	1	0.126709		DI Islets High glucose Glu_tub-Apl-Tubulin010	1	1.91609
	DI Islets Low glucose Glu_tub-Apl-Tubulin011	2	1.48832		DI Islets High glucose Glu_tub-Apl-Tubulin010	2	1.78918
	DI Islets Low glucose Glu_tub-Apl-Tubulin011	3	1.71178		DI Islets High glucose Glu_tub-Apl-Tubulin010	3	2.62918
	DI Islets Low glucose Glu_tub-Apl-Tubulin011	4	1.35439		DI Islets High glucose Glu_tub-Apl-Tubulin010	4	1.20867
	DI Islets Low glucose Glu_tub-Apl-Tubulin013	1	0.357533		DI Islets High glucose Glu_tub-Apl-Tubulin011	1	0.960705
	DI Islets Low glucose Glu_tub-Apl-Tubulin013	2	0.545624		DI Islets High glucose Glu_tub-Apl-Tubulin011	2	0.780604
	DI Islets Low glucose Glu_tub-Apl-Tubulin014	1	0.934247		DI Islets High glucose Glu_tub-Apl-Tubulin012	1	0.761611
	DI Islets Low glucose Glu_tub-Apl-Tubulin014	2	0.585821		DI Islets High glucose Glu_tub-Apl-Tubulin012	2	0.798397
	DI Islets Low glucose Glu_tub-Apl-Tubulin014	3	1.85933		DI Islets High glucose Glu_tub-Apl-Tubulin013	1	1.03196
3-2-20 Repeat 2	DI Islets Low glucose Glu_tub-Apl-Tubulin	1	2.2472		DI Islets High glucose Glu_tub-Apl-Tubulin013	2	0.344798
	DI Islets Low glucose Glu_tub-Apl-Tubulin	2	1.26127		DI Islets High glucose Glu_tub-Apl-Tubulin014	1	2.99923
	DI Islets Low glucose Glu_tub-Apl-Tubulin	3	0.603863		DI Islets High glucose Glu_tub-Apl-Tubulin014	2	1.82155
	DI Islets Low glucose Glu_tub-Apl-Tubulin001	1	1.42662		DI Islets High glucose Glu_tub-Apl-Tubulin014	3	1.707
	DI Islets Low glucose Glu_tub-Apl-Tubulin001	2	0.982236	3-2-20-2	DI Islets High glucose Glu_tub-Apl-Tubulin	1	0.523673
	DI Islets Low glucose Glu_tub-Apl-Tubulin002	1	0.485743		DI Islets High glucose Glu_tub-Apl-Tubulin	2	0.881703
	DI Islets Low glucose Glu_tub-Apl-Tubulin002	2	0.381399		DI Islets High glucose Glu_tub-Apl-Tubulin001	1	0.355411
	DI Islets Low glucose Glu_tub-Apl-Tubulin003	1	0.881807		DI Islets High glucose Glu_tub-Apl-Tubulin001	2	0.474196
	DI Islets Low glucose Glu_tub-Apl-Tubulin003	2	0.659758		DI Islets High glucose Glu_tub-Apl-Tubulin002	1	0.383127
	DI Islets Low glucose Glu_tub-Apl-Tubulin004	1	0.241605		DI Islets High glucose Glu_tub-Apl-Tubulin002	2	1.12068
	DI Islets Low glucose Glu_tub-Apl-Tubulin004	2	0.41603		DI Islets High glucose Glu_tub-Apl-Tubulin002	3	1.79428
	DI Islets Low glucose Glu_tub-Apl-Tubulin004	3	0.128525		DI Islets High glucose Glu_tub-Apl-Tubulin002	4	2.06997
	DI Islets Low glucose Glu_tub-Apl-Tubulin004	4	2.05961		DI Islets High glucose Glu_tub-Apl-Tubulin002	5	0.407824
	DI Islets Low glucose Glu_tub-Apl-Tubulin004	5	1.56667		DI Islets High glucose Glu_tub-Apl-Tubulin002	6	0.848645
	DI Islets Low glucose Glu_tub-Apl-Tubulin004	6	2.73951		DI Islets High glucose Glu_tub-Apl-Tubulin003	1	0.431051
	DI Islets Low glucose Glu_tub-Apl-Tubulin005	1	0.983334		DI Islets High glucose Glu_tub-Apl-Tubulin003	2	0.34559
	DI Islets Low glucose Glu_tub-Apl-Tubulin005	2	0.345905		DI Islets High glucose Glu_tub-Apl-Tubulin003	3	0.521896
	DI Islets Low glucose Glu_tub-Apl-Tubulin006	1	0.596219		DI Islets High glucose Glu_tub-Apl-Tubulin003	4	0.513142
	DI Islets Low glucose Glu_tub-Apl-Tubulin006	2	0.504894		DI Islets High glucose Glu_tub-Apl-Tubulin003	5	0.0849713
	DI Islets Low glucose Glu_tub-Apl-Tubulin006	3	0.580114		DI Islets High glucose Glu_tub-Apl-Tubulin004	1	1.11179
	DI Islets Low glucose Glu_tub-Apl-Tubulin007	1	0.539561		DI Islets High glucose Glu_tub-Apl-Tubulin004	2	0.490998
	DI Islets Low glucose Glu_tub-Apl-Tubulin007	2	0.75551		DI Islets High glucose Glu_tub-Apl-Tubulin004	3	0.887669
	DI Islets Low glucose Glu_tub-Apl-Tubulin007	3	0.772788		DI Islets High glucose Glu_tub-Apl-Tubulin005	1	0.977675
	DI Islets Low glucose Glu_tub-Apl-Tubulin008	1	0.697567		DI Islets High glucose Glu_tub-Apl-Tubulin006	1	1.0387
	DI Islets Low glucose Glu_tub-Apl-Tubulin008	2	1.44134		DI Islets High glucose Glu_tub-Apl-Tubulin006	2	0.993374
	DI Islets Low glucose Glu_tub-Apl-Tubulin008	3	1.13784		DI Islets High glucose Glu_tub-Apl-Tubulin007	1	2.24552
	DI Islets Low glucose Glu_tub-Apl-Tubulin009	1	0.477187		DI Islets High glucose Glu_tub-Apl-Tubulin007	2	1.64539
	DI Islets Low glucose Glu_tub-Apl-Tubulin009	2	0.701129		DI Islets High glucose Glu_tub-Apl-Tubulin008	1	0.726449
	DI Islets Low glucose Glu_tub-Apl-Tubulin010	1	2.25797		DI Islets High glucose Glu_tub-Apl-Tubulin008	2	1.87059
	DI Islets Low glucose Glu_tub-Apl-Tubulin010	2	1.69751		DI Islets High glucose Glu_tub-Apl-Tubulin009	1	1.16357
	DI Islets Low glucose Glu_tub-Apl-Tubulin010	3	2.64198		DI Islets High glucose Glu_tub-Apl-Tubulin009	2	1.7092
	DI Islets Low glucose Glu_tub-Apl-Tubulin010	4	1.02905		DI Islets High glucose Glu_tub-Apl-Tubulin011	1	0.558881
	DI Islets Low glucose Glu_tub-Apl-Tubulin011	1	1.6843		DI Islets High glucose Glu_tub-Apl-Tubulin011	2	0.828427
	DI Islets Low glucose Glu_tub-Apl-Tubulin011	2	0.435841		DI Islets High glucose Glu_tub-Apl-Tubulin012	1	0.704034
	DI Islets Low glucose Glu_tub-Apl-Tubulin011	3	1.68739		DI Islets High glucose Glu_tub-Apl-Tubulin012	2	0.721582
	DI Islets Low glucose Glu_tub-Apl-Tubulin011	4	1.73402		DI Islets High glucose Glu_tub-Apl-Tubulin013	1	0.599967
	DI Islets Low glucose Glu_tub-Apl-Tubulin012	1	0.582771		DI Islets High glucose Glu_tub-Apl-Tubulin013	2	0.622791
	DI Islets Low glucose Glu_tub-Apl-Tubulin012	2	1.0841		DI Islets High glucose Glu_tub-Apl-Tubulin014	1	0.872812
	DI Islets Low glucose Glu_tub-Apl-Tubulin013	1	1.18258		DI Islets High glucose Glu_tub-Apl-Tubulin014	2	0.835142
	DI Islets Low glucose Glu_tub-Apl-Tubulin013	2	0.971641	2020-02-19	DI Islets High glucose Glu_tub-Apl-Tubulin	1	1.43827
	DI Islets Low glucose Glu_tub-Apl-Tubulin014	1	0.636473		DI Islets High glucose Glu_tub-Apl-Tubulin	2	2.24153
	DI Islets Low glucose Glu_tub-Apl-Tubulin014	2	0.625464		DI Islets High glucose Glu_tub-Apl-Tubulin	3	0.771171
2020-02-19	DI Islets Low glucose Glu_tub-Apl-Tubulin	1	1.39484		DI Islets High glucose Glu_tub-Apl-Tubulin001	1	1.01923
	DI Islets Low glucose Glu_tub-Apl-Tubulin	2	2.49577		DI Islets High glucose Glu_tub-Apl-Tubulin001	2	0.848329
	DI Islets Low glucose Glu_tub-Apl-Tubulin001	1	1.7104		DI Islets High glucose Glu_tub-Apl-Tubulin002	1	0.59772
	DI Islets Low glucose Glu_tub-Apl-Tubulin001	2	1.58478		DI Islets High glucose Glu_tub-Apl-Tubulin002	2	0.604533
	DI Islets Low glucose Glu_tub-Apl-Tubulin002	1	0.620443		DI Islets High glucose Glu_tub-Apl-Tubulin003	1	3.90228
	DI Islets Low glucose Glu_tub-Apl-Tubulin002	2	1.57968		DI Islets High glucose Glu_tub-Apl-Tubulin003	2	1.52353
	DI Islets Low glucose Glu_tub-Apl-Tubulin002	3	0.839829		DI Islets High glucose Glu_tub-Apl-Tubulin003	3	1.20149
	DI Islets Low glucose Glu_tub-Apl-Tubulin003	1	0.973604		DI Islets High glucose Glu_tub-Apl-Tubulin003	4	0.927371
	DI Islets Low glucose Glu_tub-Apl-Tubulin003	2	0.908914		DI Islets High glucose Glu_tub-Apl-Tubulin004	1	0.713584
	DI Islets Low glucose Glu_tub-Apl-Tubulin004	1	0.503951		DI Islets High glucose Glu_tub-Apl-Tubulin004	2	1.29676
	DI Islets Low glucose Glu_tub-Apl-Tubulin005	1	1.13194		DI Islets High glucose Glu_tub-Apl-Tubulin004	3	1.29676
	DI Islets Low glucose Glu_tub-Apl-Tubulin005	2	0.809368		DI Islets High glucose Glu_tub-Apl-Tubulin005	1	0.461632
	DI Islets Low glucose Glu_tub-Apl-Tubulin005	3	0.455918		DI Islets High glucose Glu_tub-Apl-Tubulin005	2	0.431782
	DI Islets Low glucose Glu_tub-Apl-Tubulin005	4	0.838348		DI Islets High glucose Glu_tub-Apl-Tubulin006	1	0.205151
	DI Islets Low glucose Glu_tub-Apl-Tubulin005	5	0.876645		DI Islets High glucose Glu_tub-Apl-Tubulin006	2	0.185892
	DI Islets Low glucose Glu_tub-Apl-Tubulin006	1	0.848363		DI Islets High glucose Glu_tub-Apl-Tubulin006	3	0.155372
	DI Islets Low glucose Glu_tub-Apl-Tubulin006	2	0.965396		DI Islets High glucose Glu_tub-Apl-Tubulin006	4	0.197684
	DI Islets Low glucose Glu_tub-Apl-Tubulin006	3	1.07644		DI Islets High glucose Glu_tub-Apl-Tubulin007	1	0.349589
	DI Islets Low glucose Glu_tub-Apl-Tubulin006	4	0.882374		DI Islets High glucose Glu_tub-Apl-Tubulin007	2	0.271537
	7DI Islets Low glucose Glu_tub-Apl-Tubulin007	1	0.911448		DI Islets High glucose Glu_tub-Apl-Tubulin007	3	0.2905
	7DI Islets Low glucose Glu_tub-Apl-Tubulin007	2	0.17028		DI Islets High glucose Glu_tub-Apl-Tubulin008	1	0.367688
	7DI Islets Low glucose Glu_tub-Apl-Tubulin008	1	0.502102		DI Islets High glucose Glu_tub-Apl-Tubulin008	2	0.481529
	7DI Islets Low glucose Glu_tub-Apl-Tubulin008	2	0.435791		DI Islets High glucose Glu_tub-Apl-Tubulin009	1	0.466234
	7DI Islets Low glucose Glu_tub-Apl-Tubulin009	1	0.468506

[truncated: 2 more sheets: Figure 1-figure supplement 1I,J, Figure 1-figure supplement 1K]
