# Supplementary material for: Microtubules regulate pancreatic β-cell heterogeneity via spatiotemporal control of insulin secretion hot spots
Source: eLife. 2021 Nov 16;10:e59912. doi: 10.7554/eLife.59912 (PMC8635970; doi:10.7554/eLife.59912)
Supplement: Figure 2—source data 1. — Each data set is a separate sheet. [file elife-59912-fig2-data1.xlsx]

## Sheet: Figure 2E
Ctrl Low	Ctrl High	Noc Low	Noc High	Taxol Low	Taxol High			Statistical significance calculated using one-way ANOVA of each condition compared to every other condition
32.2581	63.3333	24.1379	84.2105	20.8333	29.1667			Number of families	1
17.2414	42.8571	24.1379	70.8333	23.5294	28.5714			Number of comparisons per family	15
56.8182	28	23.6842	27.5862	15.1515	38.4615			Alpha	0.05
25	69.697	22.9167	52.1739	37.037	7.5
25	60.6061	42.4242	81.3953	26.6667	18.5185			Tukey's multiple comparisons test	Mean Diff.	95.00% CI of diff.	Significant?	Summary	Adjusted P Value
29.0323	27.7778	23.8095	92.1053	23.8095	52.1739			Ctrl Low vs. Ctrl High	-19.95	-35.02 to -4.877	Yes	**	0.0028	A-B
10	37.0732	11.3636	58.3333	21.0526	28.5714			Ctrl Low vs. Noc Low	-2.03	-17.30 to 13.24	No	ns	0.9989	A-C
12.5	15.3846	50	79.4118	27.907	16.2162			Ctrl Low vs. Noc High	-43.52	-58.79 to -28.26	Yes	****	<0.0001	A-D
19.6078	57.1429	27.2727	76.9231	25	60.6061			Ctrl Low vs. Taxol Low	4.972	-10.75 to 20.69	No	ns	0.9409	A-E
17.6471	10	40.7407	44.4444	5.55556	40			Ctrl Low vs. Taxol High	-4.4	-19.47 to 10.67	No	ns	0.9575	A-F
6.66667	67.5	24.1379	60.8696	11.1111	23.5294			Ctrl High vs. Noc Low	17.92	3.070 to 32.76	Yes	**	0.0087	B-C
17.3913	58.3333	51.4286	58.1395	9.09091	7.31707			Ctrl High vs. Noc High	-23.58	-38.42 to -8.731	Yes	***	0.0002	B-D
40.4762	37.5	4.54545	66.6667	3.22581	15.3846			Ctrl High vs. Taxol Low	24.92	9.602 to 40.23	Yes	***	0.0001	B-E
11.3636	54.8387	5.88235	72.5	2.7027	20.5882			Ctrl High vs. Taxol High	15.55	0.9019 to 30.19	Yes	*	0.0307	B-F
18.75	53.8462	6.06061	94.1176	7.69231	18.9189			Noc Low vs. Noc High	-41.49	-56.54 to -26.45	Yes	****	<0.0001	C-D
33.3333	32.1429	28.2051	53.125	25	7.89474			Noc Low vs. Taxol Low	7.002	-8.508 to 22.51	No	ns	0.7781	C-E
14.6341	15.625	26.3158	55.1724		50			Noc Low vs. Taxol High	-2.37	-17.22 to 12.48	No	ns	0.9972	C-F
	67.5	10	65.9574		16.6667			Noc High vs. Taxol Low	48.5	32.99 to 64.01	Yes	****	<0.0001	D-E
	13.1579				36.8421			Noc High vs. Taxol High	39.12	24.28 to 53.97	Yes	****	<0.0001	D-F
								Taxol Low vs. Taxol High	-9.371	-24.69 to 5.945	No	ns	0.4847	E-F
								Test details	Mean 1	Mean 2	Mean Diff.	SE of diff.	n1	n2	q	DF
								Ctrl Low vs. Ctrl High	22.81	42.75	-19.95	5.187	17	19	5.438	101
								Ctrl Low vs. Noc Low	22.81	24.84	-2.03	5.255	17	18	0.5463	101
								Ctrl Low vs. Noc High	22.81	66.33	-43.52	5.255	17	18	11.71	101
								Ctrl Low vs. Taxol Low	22.81	17.84	4.972	5.412	17	16	1.299	101
								Ctrl Low vs. Taxol High	22.81	27.21	-4.4	5.187	17	19	1.2	101
								Ctrl High vs. Noc Low	42.75	24.84	17.92	5.11	19	18	4.958	101
								Ctrl High vs. Noc High	42.75	66.33	-23.58	5.11	19	18	6.525	101
								Ctrl High vs. Taxol Low	42.75	17.84	24.92	5.272	19	16	6.684	101
								Ctrl High vs. Taxol High	42.75	27.21	15.55	5.041	19	19	4.362	101
								Noc Low vs. Noc High	24.84	66.33	-41.49	5.179	18	18	11.33	101
								Noc Low vs. Taxol Low	24.84	17.84	7.002	5.338	18	16	1.855	101
								Noc Low vs. Taxol High	24.84	27.21	-2.37	5.11	18	19	0.6558	101
								Noc High vs. Taxol Low	66.33	17.84	48.5	5.338	18	16	12.85	101
								Noc High vs. Taxol High	66.33	27.21	39.12	5.11	18	19	10.83	101
								Taxol Low vs. Taxol High	17.84	27.21	-9.371	5.272	16	19	2.514	101

## Sheet: Figure 2H
Total Counts GluTub<1	Total Counts GluTub>1
8	1				Mann-Whittney non-parametric comparison test p-value is shown.
5	0
0	0				Table Analyzed
5	0
0	0				Column B	Total Counts GluTub>1
5	0				vs.	vs.
4	0				Column A	Total Counts GluTub<1
3	0
15	0				Mann Whitney test
3	0				P value	<0.0001
4	0				Exact or approximate P value?	Exact
0	0				P value summary	****
0	0				Significantly different (P < 0.05)?	Yes
0	2				One- or two-tailed P value?	Two-tailed
1	1				Sum of ranks in column A,B	3851 , 1100
0	0				Mann-Whitney U	504.5
0	0
0	0				Difference between medians
4	0				Median of column A	3.000, n=65
4	4				Median of column B	0.000, n=34
0	1				Difference: Actual	-3
7	3				Difference: Hodges-Lehmann	-2
11	1
1	3
15	0
6	0
0	1
0	0
1	0
0	0
0	0
1	0
0	0
0	0
0
4
5
1
41
19
17
12
13
16
5
5
30
11
6
0
0
7
5
2
5
1
1
0
1
2
2
3
0
2
5

## Sheet: Figure 2I
Ctrl Low	Ctrl High	Noc Low	Noc High	Taxol Low	Taxol High		Statistical significance calculated using Kruskal-Wallis test of each condition compared to every other condition
17	72	22	146	12	72		Number of families	1
17	68	16	104	11	49		Number of comparisons per family	15
10	39	12	100	11	10		Alpha	0.05
10	38	10	95	10	9
9	36	9	65	9	9		Dunn's multiple comparisons test	Mean rank diff.	Significant?	Summary	Adjusted P Value
8	34	9	63	9	9		Ctrl Low vs. Ctrl High	-377.8	Yes	****	<0.0001	A-B
8	29	8	63	8	8		Ctrl Low vs. Noc Low	-185.4	Yes	**	0.0029	A-C
7	28	8	61	7	7		Ctrl Low vs. Noc High	-901.9	Yes	****	<0.0001	A-D
7	27	8	58	6	7		Ctrl Low vs. Taxol Low	98.21	No	ns	>0.9999	A-E
7	26	6	56	6	7		Ctrl Low vs. Taxol High	-15.68	No	ns	>0.9999	A-F
7	26	6	53	6	7		Ctrl High vs. Noc Low	192.4	Yes	**	0.0011	B-C
7	23	6	50	5	7		Ctrl High vs. Noc High	-524.1	Yes	****	<0.0001	B-D
6	23	6	47	5	6		Ctrl High vs. Taxol Low	476	Yes	****	<0.0001	B-E
6	21	6	46	5	6		Ctrl High vs. Taxol High	362.1	Yes	****	<0.0001	B-F
6	18	6	45	5	5		Noc Low vs. Noc High	-716.6	Yes	****	<0.0001	C-D
6	17	5	45	5	5		Noc Low vs. Taxol Low	283.6	Yes	****	<0.0001	C-E
6	17	5	44	4	5		Noc Low vs. Taxol High	169.7	Yes	*	0.0102	C-F
6	16	4	44	4	5		Noc High vs. Taxol Low	1000	Yes	****	<0.0001	D-E
6	16	4	43	4	5		Noc High vs. Taxol High	886.3	Yes	****	<0.0001	D-F
5	16	4	42	4	5		Taxol Low vs. Taxol High	-113.9	No	ns	0.6184	E-F
5	15	4	40	4	5
5	15	4	40	4	4		Test details	Mean rank 1	Mean rank 2	Mean rank diff.	n1	n2	Z
5	14	3	39	3	4		Ctrl Low vs. Ctrl High	1601	1979	-377.8	582	637	7.249
5	13	3	39	3	4		Ctrl Low vs. Noc Low	1601	1787	-185.4	582	787	3.731
5	13	3	37	3	4		Ctrl Low vs. Noc High	1601	2503	-901.9	582	619	17.19
5	13	3	37	3	4		Ctrl Low vs. Taxol Low	1601	1503	98.21	582	495	1.767
4	12	3	37	3	4		Ctrl Low vs. Taxol High	1601	1617	-15.68	582	572	0.2931
4	11	3	34	3	4		Ctrl High vs. Noc Low	1979	1787	192.4	637	787	3.972
4	10	3	34	3	3		Ctrl High vs. Noc High	1979	2503	-524.1	637	619	10.22
4	10	3	33	3	3		Ctrl High vs. Taxol Low	1979	1503	476	637	495	8.741
4	10	3	32	3	3		Ctrl High vs. Taxol High	1979	1617	362.1	637	572	6.917
4	9	3	31	3	3		Noc Low vs. Noc High	1787	2503	-716.6	787	619	14.68
4	9	3	31	2	3		Noc Low vs. Taxol Low	1787	1503	283.6	787	495	5.439
4	9	3	31	2	3		Noc Low vs. Taxol High	1787	1617	169.7	787	572	3.398
4	9	3	30	2	3		Noc High vs. Taxol Low	2503	1503	1000	619	495	18.25
4	9	3	28	2	3		Noc High vs. Taxol High	2503	1617	886.3	619	572	16.81
3	9	3	27	2	3		Taxol Low vs. Taxol High	1503	1617	-113.9	495	572	2.041
3	9	2	27	2	3
3	9	2	26	2	3
3	9	2	26	2	3
3	9	2	24	2	3
3	8	2	24	2	3
3	8	2	23	2	3
3	8	2	23	2	3
3	8	2	23	2	3
3	8	2	23	2	3
3	8	2	23	1	2
3	8	2	23	1	2
3	8	2	23	1	2
2	8	2	22	1	2
2	8	2	22	1	2
2	8	2	22	1	2
2	7	2	21	1	2
2	7	2	21	1	2
2	7	2	21	1	2
2	7	2	21	1	2
2	7	2	21	1	2
2	7	2	21	1	2
2	6	2	20	1	2
2	6	2	19	1	2
2	6	2	18	1	2
2	6	2	18	1	2
2	6	1	17	1	2
2	6	1	17	1	2
2	5	1	17	1	2
2	5	1	17	1	2
2	5	1	17	1	2
2	5	1	16	1	2
2	5	1	16	1	1
2	5	1	16	1	1
2	5	1	15	1	1
2	5	1	15	1	1
2	5	1	15	1	1
2	5	1	14	1	1
2	5	1	14	1	1
2	5	1	14	1	1
2	5	1	13	1	1
1	5	1	13	1	1
1	5	1	13	1	1
1	5	1	13	1	1
1	5	1	13	1	1
1	4	1	12	1	1
1	4	1	12	1	1
1	4	1	12	1	1
1	4	1	12	1	1
1	4	1	12	1	1
1	4	1	12	1	1
1	4	1	11	1	1
1	4	1	11	0	1
1	4	1	11	0	1
1	4	1	11	0	1
1	4	1	11	0	1
1	4	1	11	0	1
1	4	1	11	0	1
1	4	1	11	0	1
1	4	1	11	0	1
1	4	1	11	0	1
1	4	1	11	0	1
1	4	1	10	0	1
1	4	1	10	0	1
1	4	1	10	0	1
1	4	1	10	0	1
1	4	1	10	0	1
1	4	1	10	0	1
1	4	1	10	0	1
1	4	1	10	0	1
1	4	1	10	0	1
1	3	1	10	0	1
1	3	1	10	0	1
1	3	1	10	0	1
1	3	1	9	0	1
1	3	1	9	0	1
1	3	1	9	0	1
1	3	1	9	0	1
1	3	1	9	0	1
1	3	1	9	0	1
1	3	1	9	0	1
1	3	1	9	0	1
1	3	1	9	0	1
1	3	1	9	0	1
1	3	1	9	0	1
1	3	1	8	0	1
1	3	1	8	0	1
1	3	1	8	0	1
1	3	1	8	0	1
1	3	1	8	0	1
1	3	1	8	0	1
1	3	1	8	0	1
1	3	1	7	0	1
1	3	1	7	0	1
1	3	1	7	0	1
1	3	1	7	0	1
1	3	1	7	0	1
1	3	1	7	0	1
1	3	1	7	0	1
0	3	1	7	0	1
0	3	1	7	0	1
0	3	1	7	0	1
0	3	1	7	0	1
0	3	1	6	0	1
0	2	1	6	0	1
0	2	1	6	0	1
0	2	1	6	0	0
0	2	1	6	0	0
0	2	1	6	0	0
0	2	1	6	0	0
0	2	1	6	0	0
0	2	1	6	0	0
0	2	1	6	0	0
0	2	1	6	0	0
0	2	1	6	0	0
0	2	1	6	0	0
0	2	1	6	0	0
0	2	0	6	0	0
0	2	0	6	0	0
0	2	0	6	0	0
0	2	0	5	0	0
0	2	0	5	0	0
0	2	0	5	0	0
0	2	0	5	0	0
0	2	0	5	0	0
0	2	0	5	0	0
0	2	0	5	0	0
0	2	0	5	0	0
0	2	0	5	0	0
0	2	0	5	0	0
0	2	0	5	0	0
0	2	0	5	0	0
0	2	0	5	0	0
0	2	0	5	0	0
0	2	0	5	0	0
0	2	0	5	0	0
0	2	0	5	0	0
0	2	0	5	0	0
0	2	0	5	0	0
0	2	0	5	0	0
0	2	0	5	0	0
0	2	0	4	0	0
0	2	0	4	0	0
0	2	0	4	0	0
0	1	0	4	0	0
0	1	0	4	0	0
0	1	0	4	0	0
0	1	0	4	0	0
0	1	0	4	0	0
0	1	0	4	0	0
0	1	0	4	0	0
0	1	0	4	0	0
0	1	0	4	0	0
0	1	0	4	0	0
0	1	0	4	0	0
0	1	0	4	0	0
0	1	0	4	0	0
0	1	0	4	0	0
0	1	0	4	0	0
0	1	0	4	0	0
0	1	0	4	0	0
0	1	0	4	0	0
0	1	0	4	0	0
0	1	0	4	0	0
0	1	0	4	0	0
0	1	0	4	0	0
0	1	0	4	0	0
0	1	0	4	0	0
0	1	0	4	0	0
0	1	0	4	0	0
0	1	0	4	0	0
0	1	0	4	0	0
0	1	0	3	0	0
0	1	0	3	0	0
0	1	0	3	0	0
0	1	0	3	0	0
0	1	0	3	0	0
0	1	0	3	0	0
0	1	0	3	0	0
0	1	0	3	0	0
0	1	0	3	0	0
0	1	0	3	0	0
0	1	0	3	0	0
0	1	0	3	0	0
0	1	0	3	0	0
0	1	0	3	0	0
0	1	0	3	0	0
0	1	0	3	0	0
0	1	0	3	0	0
0	1	0	3	0	0
0	1	0	3	0	0
0	1	0	3	0	0
0	1	0	3	0	0
0	1	0	3	0	0
0	1	0	3	0	0
0	1	0	3	0	0
0	1	0	3	0	0
0	1	0	3	0	0
0	1	0	3	0	0
0	1	0	3	0	0
0	1	0	3	0	0
0	1	0	3	0	0
0	1	0	3	0	0
0	1	0	3	0	0
0	1	0	3	0	0
0	1	0	3	0	0
0	1	0	3	0	0
0	1	0	3	0	0
0	1	0	3	0	0
0	1	0	3	0	0
0	1	0	3	0	0
0	1	0	3	0	0
0	1	0	3	0	0
0	1	0	3	0	0
0	1	0	3	0	0
0	1	0	2	0	0
0	1	0	2	0	0
0	1	0	2	0	0
0	1	0	2	0	0
0	1	0	2	0	0
0	1	0	2	0	0
0	1	0	2	0	0
0	1	0	2	0	0
0	1	0	2	0	0
0	1	0	2	0	0
0	1	0	2	0	0
0	1	0	2	0	0
0	1	0	2	0	0
0	1	0	2	0	0
0	1	0	2	0	0
0	1	0	2	0	0
0	0	0	2	0	0
0	0	0	2	0	0
0	0	0	2	0	0
0	0	0	2	0	0
0	0	0	2	0	0
0	0	0	2	0	0
0	0	0	2	0	0
0	0	0	2	0	0
0	0	0	2	0	0
0	0	0	2	0	0
0	0	0	2	0	0
0	0	0	2	0	0
0	0	0	2	0	0
0	0	0	2	0	0
0	0	0	2	0	0
0	0	0	2	0	0
0	0	0	2	0	0
0	0	0	2	0	0
0	0	0	2	0	0
0	0	0	2	0	0
0	0	0	2	0	0
0	0	0	2	0	0
0	0	0	2	0	0
0	0	0	2	0	0
0	0	0	2	0	0
0	0	0	2	0	0
0	0	0	2	0	0
0	0	0	2	0	0
0	0	0	2	0	0
0	0	0	2	0	0
0	0	0	2	0	0
0	0	0	2	0	0
0	0	0	2	0	0
0	0	0	2	0	0
0	0	0	2	0	0
0	0	0	2	0	0
0	0	0	2	0	0
0	0	0	2	0	0
0	0	0	2	0	0
0	0	0	2	0	0
0	0	0	2	0	0
0	0	0	2	0	0
0	0	0	2	0	0
0	0	0	2	0	0
0	0	0	2	0	0
0	0	0	2	0	0
0	0	0	2	0	0
0	0	0	1	0	0
0	0	0	1	0	0
0	0	0	1	0	0
0	0	0	1	0	0
0	0	0	1	0	0
0	0	0	1	0	0
0	0	0	1	0	0
0	0	0	1	0	0
0	0	0	1	0	0
0	0	0	1	0	0
0	0	0	1	0	0
0	0	0	1	0	0
0	0	0	1	0	0
0	0	0	1	0	0
0	0	0	1	0	0
0	0	0	1	0	0
0	0	0	1	0	0
0	0	0	1	0	0
0	0	0	1	0	0
0	0	0	1	0	0
0	0	0	1	0	0
0	0	0	1	0	0
0	0	0	1	0	0
0	0	0	1	0	0
0	0	0	1	0	0
0	0	0	1	0	0
0	0	0	1	0	0
0	0	0	1	0	0
0	0	0	1	0	0
0	0	0	1	0	0
0	0	0	1	0	0
0	0	0	1	0	0
0	0	0	1	0	0
0	0	0	1	0	0
0	0	0	1	0	0
0	0	0	1	0	0
0	0	0	1	0	0
0	0	0	1	0	0
0	0	0	1	0	0
0	0	0	1	0	0
0	0	0	1	0	0
0	0	0	1	0	0
0	0	0	1	0	0
0	0	0	1	0	0
0	0	0	1	0	0
0	0	0	1	0	0
0	0	0	1	0	0
0	0	0	1	0	0
0	0	0	1	0	0
0	0	0	1	0	0
0	0	0	1	0	0
0	0	0	1	0	0
0	0	0	1	0	0
0	0	0	1	0	0
0	0	0	1	0	0
0	0	0	1	0	0
0	0	0	1	0	0
0	0	0	1	0	0
0	0	0	1	0	0
0	0	0	1	0	0
0	0	0	1	0	0
0	0	0	1	0	0
0	0	0	1	0	0
0	0	0	1	0	0
0	0	0	1	0	0
0	0	0	1	0	0
0	0	0	1	0	0
0	0	0	1	0	0
0	0	0	1	0	0
0	0	0	1	0	0
0	0	0	1	0	0
0	0	0	1	0	0
0	0	0	1	0	0
0	0	0	1	0	0
0	0	0	1	0	0
0	0	0	1	0	0
0	0	0	1	0	0
0	0	0	1	0	0
0	0	0	1	0	0
0	0	0	1	0	0
0	0	0	1	0	0
0	0	0	1	0	0
0	0	0	1	0	0
0	0	0	1	0	0
0	0	0	1	0	0
0	0	0	1	0	0
0	0	0	1	0	0
0	0	0	1	0	0
0	0	0	1	0	0
0	0	0	1	0	0
0	0	0	1	0	0
0	0	0	1	0	0
0	0	0	1	0	0
0	0	0	0	0	0
0	0	0	0	0	0
0	0	0	0	0	0
0	0	0	0	0	0
0	0	0	0	0	0
0	0	0	0	0	0
0	0	0	0	0	0
0	0	0	0	0	0
0	0	0	0	0	0
0	0	0	0	0	0
0	0	0	0	0	0
0	0	0	0	0	0
0	0	0	0	0	0
0	0	0	0	0	0
0	0	0	0	0	0
0	0	0	0	0	0
0	0	0	0	0	0
0	0	0	0	0	0
0	0	0	0	0	0
0	0	0	0	0	0
0	0	0	0	0	0
0	0	0	0	0	0
0	0	0	0	0	0
0	0	0	0	0	0
0	0	0	0	0	0
0	0	0	0	0	0
0	0	0	0	0	0
0	0	0	0	0	0
0	0	0	0	0	0
0	0	0	0	0	0
0	0	0	0	0	0
0	0	0	0	0	0
0	0	0	0	0	0
0	0	0	0	0	0
0	0	0	0	0	0
0	0	0	0	0	0
0	0	0	0	0	0
0	0	0	0	0	0
0	0	0	0	0	0
0	0	0	0	0	0
0	0	0	0	0	0
0	0	0	0	0	0
0	0	0	0	0	0
0	0	0	0	0	0
0	0	0	0	0	0
0	0	0	0	0	0
0	0	0	0	0	0
0	0	0	0	0	0
0	0	0	0	0	0
0	0	0	0	0	0
0	0	0	0	0	0
0	0	0	0	0	0
0	0	0	0	0	0
0	0	0	0	0	0
0	0	0	0	0	0
0	0	0	0	0	0
0	0	0	0	0	0
0	0	0	0	0	0
0	0	0	0	0	0
0	0	0	0	0	0
0	0	0	0	0	0
0	0	0	0	0	0
0	0	0	0	0	0
0	0	0	0	0	0
0	0	0	0	0	0
0	0	0	0	0	0
0	0	0	0	0	0
0	0	0	0	0	0
0	0	0	0	0	0
0	0	0	0	0	0
0	0	0	0	0	0
0	0	0	0	0	0
0	0	0	0	0	0
0	0	0	0	0	0
0	0	0	0	0	0
0	0	0	0	0	0
0	0	0	0	0	0
0	0	0	0	0	0
0	0	0	0	0	0
0	0	0	0	0	0
0	0	0	0	0	0
0	0	0	0	0	0
0	0	0	0	0	0
0	0	0	0	0	0
0	0	0	0	0	0
0	0	0	0	0	0
0	0	0	0	0	0
0	0	0	0	0	0
0	0	0	0		0
0	0	0	0		0
0	0	0	0		0
0	0	0	0		0
0	0	0	0		0
0	0	0	0		0
0	0	0	0		0
0	0	0	0		0
0	0	0	0		0
0	0	0	0		0
0	0	0	0		0
0	0	0	0		0
0	0	0	0		0
0	0	0	0		0
0	0	0	0		0
0	0	0	0		0
0	0	0	0		0
0	0	0	0		0
0	0	0	0		0
0	0	0	0		0
0	0	0	0		0
0	0	0	0		0
0	0	0	0		0
0	0	0	0		0
0	0	0	0		0
0	0	0	0		0
0	0	0	0		0
0	0	0	0		0
0	0	0	0		0
0	0	0	0		0
0	0	0	0		0
0	0	0	0		0
0	0	0	0		0
0	0	0	0		0
0	0	0	0		0
0	0	0	0		0
0	0	0	0		0
0	0	0	0		0
0	0	0	0		0
0	0	0	0		0
0	0	0	0		0
0	0	0	0		0
0	0	0	0		0
0	0	0	0		0
0	0	0	0		0
0	0	0	0		0
0	0	0	0		0
0	0	0	0		0
0	0	0	0		0
0	0	0	0		0
0	0	0	0		0
0	0	0	0		0
0	0	0	0		0
0	0	0	0		0
0	0	0	0		0
0	0	0	0		0
0	0	0	0		0
0	0	0	0		0
0	0	0	0		0
0	0	0	0		0
0	0	0	0		0
0	0	0	0		0
0	0	0	0		0
0	0	0	0		0
0	0	0	0		0
0	0	0	0		0
0	0	0	0		0
0	0	0	0		0
0	0	0	0		0
0	0	0	0		0
0	0	0	0		0
0	0	0	0		0
0	0	0	0		0
0	0	0	0		0
0	0	0	0		0
0	0	0	0		0
0	0	0	0		0
0	0	0	0
0	0	0	0
0	0	0	0
0	0	0	0
0	0	0	0
0	0	0	0
0	0	0	0
0	0	0	0
0.662069	0	0	0
	0	0	0
	0	0	0
	0	0	0
	0	0	0
	0	0	0
	0	0	0
	0	0	0
	0	0	0
	0	0	0
	0	0	0
	0	0	0
	0	0	0
	0	0	0
	0	0	0
	0	0	0
	0	0	0
	0	0	0
	0	0	0
	0	0	0
	0	0	0
	0	0	0
	0	0	0
	0	0	0
	0	0	0
	0	0	0
	0	0	0
	0	0	0
	0	0	0
	0	0	0
	0	0	0
	0	0	0
	0	0
	0	0
	0	0
	0	0
	0	0
	0	0
	0	0
	0	0
	0	0
	0	0
	0	0
	0	0
	0	0
	0	0
	0	0
	0
	0
	0
	0
	0
	0
	0
	0
	0
	0
0		10	0
0		0	1
		0	0
		3	0
		0	1
		9	0
		1	0
		4
		1
		2
		3
		104
		37
		63
		33
		44
		11
		0
		0
		13
		0
		1
		2
		2
		2
		4
		3
		31
		2
		3
		2
		9
		10
		10
		3
		12
		47
		11
		7
		7
		7
		9
		1
		3
		6
		4
		4
		1
		7
		4
		2
		5
		2
		2
		0
		10
		1
		6
		5
		0
		0
		0
		2
		0
		37
		0
		3
		16
		2
		1
		2
		0
		0
		0
		0
		2
		9
		1
		0
		0
		0
		0
		0
		3
		0
		0
		5
		3
		1
		0
		4
		0
		0
		1
		0
		1
		0
		1
		2
		1
		0
		0
		1
		5
		17
		2
		0
		0
		0
		2
		1
		3
		0
		0
		4
		6
		2
		1
		3
		0
		1
		1
		4
		1
		0
		3
		5
		10
		6
		2
		6
		10
		2
		2
		5
		0
		2
		2
		0
		0
		0
		1
		1
		1
		2
		7
		0
		4
		1
		0
		0
		0
		0
		0
		2
		4
		0
		0
		0
		1

## Sheet: Figure 2Iprime
Control Low	Control High	Noc Low	Noc High	Taxol Low	Taxol High		Event #	Control Low	Control High	Noc Lo	Noc Hi	Taxol Lo	Taxol Hi
17	72	22	146	12	72		0	76.7241	58.0848	75.5981	33.4967	82.2222	75.1748
17	68	16	104	11	49		1	10	13.6578	14.5136	15.1961	8.48485	12.9371
10	39	12	100	11	10		2	4.82759	6.27943	3.98724	10.2941	2.82828	3.84615
10	38	10	95	10	9		3	2.24138	5.18053	2.39234	7.02614	2.0202	3.14685
9	36	9	65	9	9		4	1.72414	4.08163	0.797448	5.06536	1.21212	1.22378
8	34	9	63	9	9		5	1.2069	2.66876	0.318979	3.43137	1.0101	1.22378
8	29	8	63	8	8		6	1.2069	0.941915	0.956938	2.77778	0.606061	0.34965
7	28	8	61	7	7		7	0.862069	0.941915	0	1.79739	0.20202	0.874126
7	27	8	58	6	7		8	0.344828	1.72684	0.478469	1.14379	0.20202	0.174825
7	26	6	56	6	7		9	0.172414	1.56986	0.318979	1.79739	0.40404	0.524476
7	26	6	53	6	7		10	0.344828	0.470958	0.15949	1.96078	0.20202	0.174825
7	23	6	50	5	7		11	0	0.156986	0	1.79739	0.40404	0
6	23	6	47	5	6		12	0	0.156986	0.15949	0.980392	0.20202	0
6	21	6	46	5	6		>12	0.344828	4.08163	0.318979	13.2353	0	0.34965
6	18	6	45	5	5
6	17	5	45	5	5
6	17	5	44	4	5
6	16	4	44	4	5
6	16	4	43	4	5
5	16	4	42	4	5
5	15	4	40	4	5
5	15	4	40	4	4
5	14	3	39	3	4
5	13	3	39	3	4
5	13	3	37	3	4
5	13	3	37	3	4
4	12	3	37	3	4
4	11	3	34	3	4
4	10	3	34	3	3
4	10	3	33	3	3
4	10	3	32	3	3
4	9	3	31	3	3
4	9	3	31	2	3
4	9	3	31	2	3
4	9	3	30	2	3
4	9	3	28	2	3
3	9	3	27	2	3
3	9	2	27	2	3
3	9	2	26	2	3
3	9	2	26	2	3
3	9	2	24	2	3
3	8	2	24	2	3
3	8	2	23	2	3
3	8	2	23	2	3
3	8	2	23	2	3
3	8	2	23	2	3
3	8	2	23	1	2
3	8	2	23	1	2
3	8	2	23	1	2
2	8	2	22	1	2
2	8	2	22	1	2
2	8	2	22	1	2
2	7	2	21	1	2
2	7	2	21	1	2
2	7	2	21	1	2
2	7	2	21	1	2
2	7	2	21	1	2
2	7	2	21	1	2
2	6	2	20	1	2
2	6	2	19	1	2
2	6	2	18	1	2
2	6	2	18	1	2
2	6	1	17	1	2
2	6	1	17	1	2
2	5	1	17	1	2
2	5	1	17	1	2
2	5	1	17	1	2
2	5	1	16	1	2
2	5	1	16	1	1
2	5	1	16	1	1
2	5	1	15	1	1
2	5	1	15	1	1
2	5	1	15	1	1
2	5	1	14	1	1
2	5	1	14	1	1
2	5	1	14	1	1
2	5	1	13	1	1
1	5	1	13	1	1
1	5	1	13	1	1
1	5	1	13	1	1
1	5	1	13	1	1
1	4	1	12	1	1
1	4	1	12	1	1
1	4	1	12	1	1
1	4	1	12	1	1
1	4	1	12	1	1
1	4	1	12	1	1
1	4	1	11	1	1
1	4	1	11	0	1
1	4	1	11	0	1
1	4	1	11	0	1
1	4	1	11	0	1
1	4	1	11	0	1
1	4	1	11	0	1
1	4	1	11	0	1
1	4	1	11	0	1
1	4	1	11	0	1
1	4	1	11	0	1
1	4	1	10	0	1
1	4	1	10	0	1
1	4	1	10	0	1
1	4	1	10	0	1
1	4	1	10	0	1
1	4	1	10	0	1
1	4	1	10	0	1
1	4	1	10	0	1
1	4	1	10	0	1
1	3	1	10	0	1
1	3	1	10	0	1
1	3	1	10	0	1
1	3	1	9	0	1
1	3	1	9	0	1
1	3	1	9	0	1
1	3	1	9	0	1
1	3	1	9	0	1
1	3	1	9	0	1
1	3	1	9	0	1
1	3	1	9	0	1
1	3	1	9	0	1
1	3	1	9	0	1
1	3	1	9	0	1
1	3	1	8	0	1
1	3	1	8	0	1
1	3	1	8	0	1
1	3	1	8	0	1
1	3	1	8	0	1
1	3	1	8	0	1
1	3	1	8	0	1
1	3	1	7	0	1
1	3	1	7	0	1
1	3	1	7	0	1
1	3	1	7	0	1
1	3	1	7	0	1
1	3	1	7	0	1
1	3	1	7	0	1
0	3	1	7	0	1
0	3	1	7	0	1
0	3	1	7	0	1
0	3	1	7	0	1
0	3	1	6	0	1
0	2	1	6	0	1
0	2	1	6	0	1
0	2	1	6	0	0
0	2	1	6	0	0
0	2	1	6	0	0
0	2	1	6	0	0
0	2	1	6	0	0
0	2	1	6	0	0
0	2	1	6	0	0
0	2	1	6	0	0
0	2	1	6	0	0
0	2	1	6	0	0
0	2	1	6	0	0
0	2	0	6	0	0
0	2	0	6	0	0
0	2	0	6	0	0
0	2	0	5	0	0
0	2	0	5	0	0
0	2	0	5	0	0
0	2	0	5	0	0
0	2	0	5	0	0
0	2	0	5	0	0
0	2	0	5	0	0
0	2	0	5	0	0
0	2	0	5	0	0
0	2	0	5	0	0
0	2	0	5	0	0
0	2	0	5	0	0
0	2	0	5	0	0
0	2	0	5	0	0
0	2	0	5	0	0
0	2	0	5	0	0
0	2	0	5	0	0
0	2	0	5	0	0
0	2	0	5	0	0
0	2	0	5	0	0
0	2	0	5	0	0
0	2	0	4	0	0
0	2	0	4	0	0
0	2	0	4	0	0
0	1	0	4	0	0
0	1	0	4	0	0
0	1	0	4	0	0
0	1	0	4	0	0
0	1	0	4	0	0
0	1	0	4	0	0
0	1	0	4	0	0
0	1	0	4	0	0
0	1	0	4	0	0
0	1	0	4	0	0
0	1	0	4	0	0
0	1	0	4	0	0
0	1	0	4	0	0
0	1	0	4	0	0
0	1	0	4	0	0
0	1	0	4	0	0
0	1	0	4	0	0
0	1	0	4	0	0
0	1	0	4	0	0
0	1	0	4	0	0
0	1	0	4	0	0
0	1	0	4	0	0
0	1	0	4	0	0
0	1	0	4	0	0
0	1	0	4	0	0
0	1	0	4	0	0
0	1	0	4	0	0
0	1	0	4	0	0
0	1	0	3	0	0
0	1	0	3	0	0
0	1	0	3	0	0
0	1	0	3	0	0
0	1	0	3	0	0
0	1	0	3	0	0
0	1	0	3	0	0
0	1	0	3	0	0
0	1	0	3	0	0
0	1	0	3	0	0
0	1	0	3	0	0
0	1	0	3	0	0
0	1	0	3	0	0
0	1	0	3	0	0
0	1	0	3	0	0
0	1	0	3	0	0
0	1	0	3	0	0
0	1	0	3	0	0
0	1	0	3	0	0
0	1	0	3	0	0
0	1	0	3	0	0
0	1	0	3	0	0
0	1	0	3	0	0
0	1	0	3	0	0
0	1	0	3	0	0
0	1	0	3	0	0
0	1	0	3	0	0
0	1	0	3	0	0
0	1	0	3	0	0
0	1	0	3	0	0
0	1	0	3	0	0
0	1	0	3	0	0
0	1	0	3	0	0
0	1	0	3	0	0
0	1	0	3	0	0
0	1	0	3	0	0
0	1	0	3	0	0
0	1	0	3	0	0
0	1	0	3	0	0
0	1	0	3	0	0
0	1	0	3	0	0
0	1	0	3	0	0
0	1	0	3	0	0
0	1	0	2	0	0
0	1	0	2	0	0
0	1	0	2	0	0
0	1	0	2	0	0
0	1	0	2	0	0
0	1	0	2	0	0
0	1	0	2	0	0
0	1	0	2	0	0
0	1	0	2	0	0
0	1	0	2	0	0
0	1	0	2	0	0
0	1	0	2	0	0
0	1	0	2	0	0
0	1	0	2	0	0
0	1	0	2	0	0
0	1	0	2	0	0
0	0	0	2	0	0
0	0	0	2	0	0
0	0	0	2	0	0
0	0	0	2	0	0
0	0	0	2	0	0
0	0	0	2	0	0
0	0	0	2	0	0
0	0	0	2	0	0
0	0	0	2	0	0
0	0	0	2	0	0
0	0	0	2	0	0
0	0	0	2	0	0
0	0	0	2	0	0
0	0	0	2	0	0
0	0	0	2	0	0
0	0	0	2	0	0
0	0	0	2	0	0
0	0	0	2	0	0
0	0	0	2	0	0
0	0	0	2	0	0
0	0	0	2	0	0
0	0	0	2	0	0
0	0	0	2	0	0
0	0	0	2	0	0
0	0	0	2	0	0
0	0	0	2	0	0
0	0	0	2	0	0
0	0	0	2	0	0
0	0	0	2	0	0
0	0	0	2	0	0
0	0	0	2	0	0
0	0	0	2	0	0
0	0	0	2	0	0
0	0	0	2	0	0
0	0	0	2	0	0
0	0	0	2	0	0
0	0	0	2	0	0
0	0	0	2	0	0
0	0	0	2	0	0
0	0	0	2	0	0
0	0	0	2	0	0
0	0	0	2	0	0
0	0	0	2	0	0
0	0	0	2	0	0
0	0	0	2	0	0
0	0	0	2	0	0
0	0	0	2	0	0
0	0	0	1	0	0
0	0	0	1	0	0
0	0	0	1	0	0
0	0	0	1	0	0
0	0	0	1	0	0
0	0	0	1	0	0
0	0	0	1	0	0
0	0	0	1	0	0
0	0	0	1	0	0
0	0	0	1	0	0
0	0	0	1	0	0
0	0	0	1	0	0
0	0	0	1	0	0
0	0	0	1	0	0
0	0	0	1	0	0
0	0	0	1	0	0
0	0	0	1	0	0
0	0	0	1	0	0
0	0	0	1	0	0
0	0	0	1	0	0
0	0	0	1	0	0
0	0	0	1	0	0
0	0	0	1	0	0
0	0	0	1	0	0
0	0	0	1	0	0
0	0	0	1	0	0
0	0	0	1	0	0
0	0	0	1	0	0
0	0	0	1	0	0
0	0	0	1	0	0
0	0	0	1	0	0
0	0	0	1	0	0
0	0	0	1	0	0
0	0	0	1	0	0
0	0	0	1	0	0
0	0	0	1	0	0
0	0	0	1	0	0
0	0	0	1	0	0
0	0	0	1	0	0
0	0	0	1	0	0
0	0	0	1	0	0
0	0	0	1	0	0
0	0	0	1	0	0
0	0	0	1	0	0
0	0	0	1	0	0
0	0	0	1	0	0
0	0	0	1	0	0
0	0	0	1	0	0
0	0	0	1	0	0
0	0	0	1	0	0
0	0	0	1	0	0
0	0	0	1	0	0
0	0	0	1	0	0
0	0	0	1	0	0
0	0	0	1	0	0
0	0	0	1	0	0
0	0	0	1	0	0
0	0	0	1	0	0
0	0	0	1	0	0
0	0	0	1	0	0
0	0	0	1	0	0
0	0	0	1	0	0
0	0	0	1	0	0
0	0	0	1	0	0
0	0	0	1	0	0
0	0	0	1	0	0
0	0	0	1	0	0
0	0	0	1	0	0
0	0	0	1	0	0
0	0	0	1	0	0
0	0	0	1	0	0
0	0	0	1	0	0
0	0	0	1	0	0
0	0	0	1	0	0
0	0	0	1	0	0
0	0	0	1	0	0
0	0	0	1	0	0
0	0	0	1	0	0
0	0	0	1	0	0
0	0	0	1	0	0
0	0	0	1	0	0
0	0	0	1	0	0
0	0	0	1	0	0
0	0	0	1	0	0
0	0	0	1	0	0
0	0	0	1	0	0
0	0	0	1	0	0
0	0	0	1	0	0
0	0	0	1	0	0
0	0	0	1	0	0
0	0	0	1	0	0
0	0	0	1	0	0
0	0	0	1	0	0
0	0	0	0	0	0
0	0	0	0	0	0
0	0	0	0	0	0
0	0	0	0	0	0
0	0	0	0	0	0
0	0	0	0	0	0
0	0	0	0	0	0
0	0	0	0	0	0
0	0	0	0	0	0
0	0	0	0	0	0
0	0	0	0	0	0
0	0	0	0	0	0
0	0	0	0	0	0
0	0	0	0	0	0
0	0	0	0	0	0
0	0	0	0	0	0
0	0	0	0	0	0
0	0	0	0	0	0
0	0	0	0	0	0
0	0	0	0	0	0
0	0	0	0	0	0
0	0	0	0	0	0
0	0	0	0	0	0
0	0	0	0	0	0
0	0	0	0	0	0
0	0	0	0	0	0
0	0	0	0	0	0
0	0	0	0	0	0
0	0	0	0	0	0
0	0	0	0	0	0
0	0	0	0	0	0
0	0	0	0	0	0
0	0	0	0	0	0
0	0	0	0	0	0
0	0	0	0	0	0
0	0	0	0	0	0
0	0	0	0	0	0
0	0	0	0	0	0
0	0	0	0	0	0
0	0	0	0	0	0
0	0	0	0	0	0
0	0	0	0	0	0
0	0	0	0	0	0
0	0	0	0	0	0
0	0	0	0	0	0
0	0	0	0	0	0
0	0	0	0	0	0
0	0	0	0	0	0
0	0	0	0	0	0
0	0	0	0	0	0
0	0	0	0	0	0
0	0	0	0	0	0
0	0	0	0	0	0
0	0	0	0	0	0
0	0	0	0	0	0
0	0	0	0	0	0
0	0	0	0	0	0
0	0	0	0	0	0
0	0	0	0	0	0
0	0	0	0	0	0
0	0	0	0	0	0
0	0	0	0	0	0
0	0	0	0	0	0
0	0	0	0	0	0
0	0	0	0	0	0
0	0	0	0	0	0
0	0	0	0	0	0
0	0	0	0	0	0
0	0	0	0	0	0
0	0	0	0	0	0
0	0	0	0	0	0
0	0	0	0	0	0
0	0	0	0	0	0
0	0	0	0	0	0
0	0	0	0	0	0
0	0	0	0	0	0
0	0	0	0	0	0
0	0	0	0	0	0
0	0	0	0	0	0
0	0	0	0	0	0
0	0	0	0	0	0
0	0	0	0	0	0
0	0	0	0	0	0
0	0	0	0	0	0
0	0	0	0	0	0
0	0	0	0	0	0
0	0	0	0	0	0
0	0	0	0	0	0
0	0	0	0		0
0	0	0	0		0
0	0	0	0		0
0	0	0	0		0
0	0	0	0		0
0	0	0	0		0
0	0	0	0		0
0	0	0	0		0
0	0	0	0		0
0	0	0	0		0
0	0	0	0		0
0	0	0	0		0
0	0	0	0		0
0	0	0	0		0
0	0	0	0		0
0	0	0	0		0
0	0	0	0		0
0	0	0	0		0
0	0	0	0		0
0	0	0	0		0
0	0	0	0		0
0	0	0	0		0
0	0	0	0		0
0	0	0	0		0
0	0	0	0		0
0	0	0	0		0
0	0	0	0		0
0	0	0	0		0
0	0	0	0		0
0	0	0	0		0
0	0	0	0		0
0	0	0	0		0
0	0	0	0		0
0	0	0	0		0
0	0	0	0		0
0	0	0	0		0
0	0	0	0		0
0	0	0	0		0
0	0	0	0		0
0	0	0	0		0
0	0	0	0		0
0	0	0	0		0
0	0	0	0		0
0	0	0	0		0
0	0	0	0		0
0	0	0	0		0
0	0	0	0		0
0	0	0	0		0
0	0	0	0		0
0	0	0	0		0
0	0	0	0		0
0	0	0	0		0
0	0	0	0		0
0	0	0	0		0
0	0	0	0		0
0	0	0	0		0
0	0	0	0		0
0	0	0	0		0
0	0	0	0		0
0	0	0	0		0
0	0	0	0		0
0	0	0	0		0
0	0	0	0		0
0	0	0	0		0
0	0	0	0		0
0	0	0	0		0
0	0	0	0		0
0	0	0	0		0
0	0	0	0		0
0	0	0	0		0
0	0	0	0		0
0	0	0	0		0
0	0	0	0		0
0	0	0	0		0
0	0	0	0		0
0	0	0	0		0
0	0	0	0		0
0	0	0	0
0	0	0	0
0	0	0	0
0	0	0	0
0	0	0	0
0	0	0	0
0	0	0	0
0	0	0	0
	0	0	0
	0	0	0
	0	0	0
	0	0	0
	0	0	0
	0	0	0
	0	0	0
	0	0	0
	0	0	0
	0	0	0
	0	0	0
	0	0	0
	0	0	0
	0	0	0
	0	0	0
	0	0	0
	0	0	0
	0	0	0
	0	0	0
	0	0	0
	0	0	0
	0	0	0
	0	0	0
	0	0	0
	0	0	0
	0	0	0
	0	0	0
	0	0	0
	0	0	0
	0	0	0
	0	0	0
	0	0	0
	0	0
	0	0
	0	0
	0	0
	0	0
	0	0
	0	0
	0	0
	0	0
	0	0
	0	0
	0	0
	0	0
	0	0
	0	0
	0
	0
	0
	0
	0
	0
	0
	0
	0
	0

## Sheet: Figure 2J
Ctrl Low	Ctrl High	Noc Low	Noc High	Taxol Low	Taxol High			Statistical significance calculated using Kruskal-Wallis test of each condition compared to every other condition
17	72	22	146	12	72			Number of families	1
17	68	16	104	11	49			Number of comparisons per family	15
10	39	12	100	11	10			Alpha	0.05
10	38	10	95	10	9
10		2	1					Dunn's multiple comparisons test	Mean rank diff.	Significant?	Summary	Adjusted P Value
9	36	9	65	9	9			Ctrl Low vs. Ctrl High	-235.5	Yes	****	<0.0001	A-B
8	34	9	63	9	9			Ctrl Low vs. Noc Low	110.4	No	ns	0.3666	A-C
8	29	8	63	8	8			Ctrl Low vs. Noc High	-357	Yes	****	<0.0001	A-D
8			1					Ctrl Low vs. Taxol Low	-21.1	No	ns	>0.9999	A-E
7	28	8	61	7	7			Ctrl Low vs. Taxol High	42.9	No	ns	>0.9999	A-F
7	27	8	58	6	7			Ctrl High vs. Noc Low	345.9	Yes	****	<0.0001	B-C
7	26	6	56	6	7			Ctrl High vs. Noc High	-121.4	Yes	**	0.0055	B-D
7	26	6	53	6	7			Ctrl High vs. Taxol Low	214.4	Yes	***	0.0003	B-E
7	23	6	50	5	7			Ctrl High vs. Taxol High	278.4	Yes	****	<0.0001	B-F
7		1	1					Noc Low vs. Noc High	-467.4	Yes	****	<0.0001	C-D
7		2	1					Noc Low vs. Taxol Low	-131.5	No	ns	0.2271	C-E
6	23	6	47	5	6			Noc Low vs. Taxol High	-67.52	No	ns	>0.9999	C-F
6	21	6	46	5	6			Noc High vs. Taxol Low	335.9	Yes	****	<0.0001	D-E
6	18	6	45	5	5			Noc High vs. Taxol High	399.9	Yes	****	<0.0001	D-F
6	17	5	45	5	5			Taxol Low vs. Taxol High	63.99	No	ns	>0.9999	E-F
6	17	5	44	4	5
6	16	4	44	4	5			Test details	Mean rank 1	Mean rank 2	Mean rank diff.	n1	n2	Z
6	16	4	43	4	5			Ctrl Low vs. Ctrl High	816.3	1052	-235.5	221	420	5.262
6		1	1					Ctrl Low vs. Noc Low	816.3	705.9	110.4	221	265	2.25
6								Ctrl Low vs. Noc High	816.3	1173	-357	221	616	8.451
6				4	2			Ctrl Low vs. Taxol Low	816.3	837.4	-21.1	221	158	0.3759
5	16	4	42	4	5			Ctrl Low vs. Taxol High	816.3	773.4	42.9	221	245	0.8584
5	15	4	40	4	5			Ctrl High vs. Noc Low	1052	705.9	345.9	420	265	8.186
5	15	4	40	4	4			Ctrl High vs. Noc High	1052	1173	-121.4	420	616	3.563
5	14	3	39	3	4			Ctrl High vs. Taxol Low	1052	837.4	214.4	420	158	4.265
5	13	3	39	3	4			Ctrl High vs. Taxol High	1052	773.4	278.4	420	245	6.43
5	13	3	37	3	4			Noc Low vs. Noc High	705.9	1173	-467.4	265	616	11.81
5	13	3	37	3	4			Noc Low vs. Taxol Low	705.9	837.4	-131.5	265	158	2.429
5	3	1	7		1			Noc Low vs. Taxol High	705.9	773.4	-67.52	265	245	1.414
5		8	1					Noc High vs. Taxol Low	1173	837.4	335.9	616	158	6.992
5								Noc High vs. Taxol High	1173	773.4	399.9	616	245	9.828
4	12	3	37	3	4			Taxol Low vs. Taxol High	837.4	773.4	63.99	158	245	1.164
4	11	3	34	3	4
4	10	3	34	3	3
4	10	3	33	3	3
4	10	3	32	3	3
4	9	3	31	3	3
4	9	3	31	2	3
4	9	3	31	2	3
4	9	3	30	2	3
4	9	3	28	2	3
4	2	1	5		3
4		3	1
4			23
4	5		3		1
4
4
3	9	3	27	2	3
3	9	2	27	2	3
3	9	2	26	2	3
3	9	2	26	2	3
3	9	2	24	2	3
3	8	2	24	2	3
3	8	2	23	2	3
3	8	2	23	2	3
3	8	2	23	2	3
3	8	2	23	2	3
3	8	2	23	1	2
3	8	2	23	1	2
3	8	2	23	1	2
3	2	1	5	2	1
3	1	1	2
3	6		1	1
3				4	1
3
3	3		1		2
3
2	8	2	22	1	2
2	8	2	22	1	2
2	8	2	22	1	2
2	7	2	21	1	2
2	7	2	21	1	2
2	7	2	21	1	2
2	7	2	21	1	2
2	7	2	21	1	2
2	7	2	21	1	2
2	6	2	20	1	2
2	6	2	19	1	2
2	6	2	18	1	2
2	6	2	18	1	2
2	6	1	17	1	2
2	6	1	17	1	2
2	5	1	17	1	2
2	5	1	17	1	2
2	5	1	17	1	2
2	5	1	16	1	2
2	5	1	16	1	1
2	5	1	16	1	1
2	5	1	15	1	1
2	5	1	15	1	1
2	5	1	15	1	1
2	5	1	14	1	1
2	5	1	14	1	1
2	5	1	14	1	1
2	5	1	13	1	1
2	3	1	7		1
2	3	1	7		1
2	2	2	5		5
2	2		5
2	2		5
2	1		3	8
2	1		3		9
2	1		3		3
2	1		3		1
2	2		1
2		1	1
2	2	1
2	15				1
2
2
2				1
2			2
2	1		1
2	9		3		2
2
1	5	1	13	1	1
1	5	1	13	1	1
1	5	1	13	1	1
1	5	1	13	1	1
1	4	1	12	1	1
1	4	1	12	1	1
1	4	1	12	1	1
1	4	1	12	1	1
1	4	1	12	1	1
1	4	1	12	1	1
1	4	1	11	1	1
1	4	1	11		1
1	4	1	11		1
1	4	1	11		1
1	4	1	11		1
1	4	1	11		1
1	4	1	11		1
1	4	1	11	1	1
1	4	1	11	1	1
1	4	1	11	4	1
1	4	1	11	2	1
1	4	1	10	1	1
1	4	1	10	1	1
1	4	1	10	1	1
1	4	1	10	1	1
1	4	1	10	1	1
1	4	1	10	3	1
1	4	1	10		1
1	4	1	10		1
1	4	1	10		1
1	3	1	10		1
1	3	1	10		1
1	3	1	10		1
1	3	1	9		1
1	3	1	9		1
1	3	1	9		1
1	3	1	9		1
1	3	1	9		1
1	3	1	9		1
1	3	1	9		1
1	3	1	9		1
1	3	1	9		1
1	3	1	9		1
1	3	1	9		1
1	3	1	8		1
1	3	1	8	5	1
1	3	1	8	6	1
1	3	1	8	9	1
1	3	1	8	1	1
1	3	1	8	7	1
1	3	1	8	1	1
1	3	1	7	2	1
1	3	1	7	6	1
1	3	1	7		1
1	3	1	7		1
1	3	1	7		1
1	3	1	7		1
1	3	1	7		1
1	2	1	5		1
1	2		5		2
1	2		5		3
1	2		5
1	1	1	4
1	1	1	4		1
1	1	2	4		1
1	1		3	11
1	1		3		6
1	1		3		3
1	1		3		4
1	1		3		1
1	1		3		1
1	1		3		4
1	1		3		2
1	8		2
1	8		2
1	1		2
1		4	2
1	1	1	2
1	8		1
1	4		1
1	5		1
1	7		1
1	14		1	1
1	3		1	10
1		1	1
1		10	1
1		3	3
1		1	8
1	2
1	5
1	16
1	1				1
1	1
1
1
1				2	1
1				1
1
1			61
1			9
1		1
	3	1	7		1
	3	1	6		1
	2	1	6		1
	2	1	6		1
	2	1	6
	2	1	6
	2	1	6
	2	1	6
	2	1	6
	2	1	6
	2	1	6
	2	1	6
	2	1	6
	2	1	6
	2	1	6
	2	1	6	2	1
	2	1	6	1	1
	2	2	6	1	3
	2	1	5	1	1
	2		5
	2		5
	2		5
	2		5
	2		5
	2		5
	2		5
	2		5
	2		5	1
	2		5	1
	2		5	9
	2		4	4
	2		4	5
	2		4	1
	1		4	1
	1		4	1
	1	1	4
	1	1	4
	1	1	4
	1	1	4
	1	1	4
	1	2	4
	1	6	4		1
	1		4		1
	1		4		1
	1		4		1
	1		4
	1		4
	1		4
	1		4
	1		4
	1		4
	1		4
	1		4
	1		4
	1		4
	1		4
	1		4
	1		4
	1		3
	1		3
	1		3
	1		3
	1		3
	1		3	6
	1		3	1
	1		3	3
	1		3	12
	1		3	5
	1		3	3
	1		3	1
	1		3	1
	1		3	3
	1		3	2
	1	1	3
	1	6	3
	1	1	3
	1	1	3
	1	2	3		1
	1		3		4
	1		3		5
	1		3		2
	1		3		2
	1		3		2
	1		3		1
	1		3		3
	1		3		4
	1		3		1
	1		3
	1		3
	1		2
	1		2
	1		2
	1		2
	1		2
	1		2
	1		2	3
	1		2	1
	1		2	1
	1		2	3
	1		2	4
	1		2	4
	1		2	3	2
	1		2	2	1
	1		2	1	1
	1		2	3	1
			2	1	10
			2		7
			2		2
		2	2		3
		3	2		9
		1	2		4
		1	2		6
		1	2		3
		2	2		3
		2	2		3
		1	2
		1	2
	3	1	2
	2	1	2
	3	3	2
	3	2	2
	1	1	2
	6	9	2
	1	3	2
	1		2
	2		2
	1		2
	1		2
	1		2
	1		2
			2
			2
			2
			2		3
			2		4
			2		5
			2	2	1
		2	2	1	2
		1	2		1
		1	2		1
		16	2
	1	22	2
		6	2
			2
			2
			2
			1
			1
			1
			1
			1
			1
			1
			1
			1
			1
			1
			1
			1
			1
			1
			1
			1
			1
			1
			1		1
			1		1
		1	1		1
		3	1
	5	1	1	1
	4	1	1	1
	3	2	1
	4	2	1
	1	4	1
	4	3	1
	2	1	1
	21	1	1
	4	1	1
	5		1
	7		1
	1		1
	3		1
	1		1
	10		1
			1
			1
			1
			1
		1	1
		1	1
		1	1
		2	1
		1	1
		1	1
		4	1
			1
			1
			1
	1		1
	1		1		1
	2		1		1
	1		1		1
	3		1		1
	3		1		1
	1		1		1
	1		1
	6		1
	2		1
	4		1
	1		1
	3		1
	13		1
	8		1
	6		1
	1		1	1
	5		1
	3		1
	1	2	1
	1	1	1
		3	1
		5	1
		1	1
		2	1
					2
					3
					1
					1
					1
				5
	2
	5
	2
	2	1
	5	1
	4
	10
	4
	3
	5
	4
	9
	1
	3
	1
	28
					2
					2
			1		1
			3		1
			2		1
			1		3
			1		1
			1
	4		1
	4		3
	1		1
	3		1	1
	3		1	2
	2		3
	16		1
	1		4
	8		5
	26		2
	8		4
	4		1
	3		1
	1		2
	17
	1
	2	1
	1	1
	29
	7
	17
	2		2
	1		1
	1		2
	3		4
	1		1
	13		4
	2		3
	23		1
	1		3
			4
			6
			1
		1	3
		1	3
	2		45		3
			14		1
			5		1
			2		3
			7		1
			3		2
			3
			15
			1
			3
			2
			15
			28
			42
		3	21
		1	3
		3			1
		1			1
		1			1
		2			1
		1
		1
		1
	4
	11
	2
	6
	39
	8
	4
	9
	12
	36
	2
	8				72
	4		5		4
	5		11		1
	16		11		1
	4		5		49
	7		11		9
	4		10		1
	8		27
	2		2
	3		10
	1		1
	1		1
	2		6
	3	1	3
	2	2	6
	8	2	9
		1	2
		6	8
		3	8
		9	14
		6	11
		3	13
		8	23
	2
	1
	1
	2
	2
			2
			5
			1
			31
			5
			1
			2
			2
			100
		1	4
		1	9
			7
			1
			5
			2
			10
			3
			9
			1
			4
			1
			2
			3
			104
			37
			63
			33
			44
			11
			13
			1
			2
			2
			2
			4
			3
			31
			2
			3
			2
			9
			10
			10
			3
			12
			47
			11
			7
			7
			7
			9
			1
			3
			6
			4
			4
			1
			7
			4
			2
			5
			2
			2
			10
			1
			6
			5
			2
			37
			3
			16
			2
			1
			2
			2
			9
			1
			3
			5
			3
			1
			4
			1
			1
			1
			2
			1
			1
			5
			17
			2
			2
			1
			3
			4
			6
			2
			1
			3
			1
			1
			4
			1
			3
			5
			10
			6
			2
			6
			10
			2
			2
			5
			2
			2
			1
			1
			1
			2
			7
			4
			1
			2
			4
			1

## Sheet: Figure 2Jprime
Control Low	Control High	Noc Low	Noc High	Taxol Low	Taxol High		Event #	Control Low	Control High	Noc Lo	Noc Hi	Taxol Lo	Taxol Hi
17	72	22	146	12	72		1	42.963	32.5843	59.4771	22.8501	47.7273	52.1127
17	68	16	104	11	49		2	20.7407	14.9813	16.3399	15.4791	15.9091	15.493
10	39	12	100	11	10		3	9.62963	12.3596	9.80392	10.5651	11.3636	12.6761
10	38	10	95	10	9		4	7.40741	9.73783	3.26797	7.61671	6.81818	4.92958
9	36	9	65	9	9		5	5.18519	6.36704	1.30719	5.15971	5.68182	4.92958
8	34	9	63	9	9		6	5.18519	2.24719	3.92157	4.1769	3.40909	1.40845
8	29	8	63	8	8		7	3.7037	2.24719	0	2.7027	1.13636	3.52113
7	28	8	61	7	7		8	1.48148	4.11985	1.96078	1.7199	1.13636	0.704225
7	27	8	58	6	7		9	0.740741	3.74532	1.30719	2.7027	2.27273	2.11268
7	26	6	56	6	7		10	1.48148	1.1236	0.653595	2.9484	1.13636	0.704225
7	26	6	53	6	7		11	0	0.374532	0	2.7027	2.27273	0
7	23	6	50	5	7		12	0	0.374532	0.653595	1.4742	1.13636	0
6	23	6	47	5	6		>12	1.48148	9.73783	1.30719	19.9017	0	1.40845
6	21	6	46	5	6
6	18	6	45	5	5
6	17	5	45	5	5
6	17	5	44	4	5
6	16	4	44	4	5
6	16	4	43	4	5
5	16	4	42	4	5
5	15	4	40	4	5
5	15	4	40	4	4
5	14	3	39	3	4
5	13	3	39	3	4
5	13	3	37	3	4
5	13	3	37	3	4
4	12	3	37	3	4
4	11	3	34	3	4
4	10	3	34	3	3
4	10	3	33	3	3
4	10	3	32	3	3
4	9	3	31	3	3
4	9	3	31	2	3
4	9	3	31	2	3
4	9	3	30	2	3
4	9	3	28	2	3
3	9	3	27	2	3
3	9	2	27	2	3
3	9	2	26	2	3
3	9	2	26	2	3
3	9	2	24	2	3
3	8	2	24	2	3
3	8	2	23	2	3
3	8	2	23	2	3
3	8	2	23	2	3
3	8	2	23	2	3
3	8	2	23	1	2
3	8	2	23	1	2
3	8	2	23	1	2
2	8	2	22	1	2
2	8	2	22	1	2
2	8	2	22	1	2
2	7	2	21	1	2
2	7	2	21	1	2
2	7	2	21	1	2
2	7	2	21	1	2
2	7	2	21	1	2
2	7	2	21	1	2
2	6	2	20	1	2
2	6	2	19	1	2
2	6	2	18	1	2
2	6	2	18	1	2
2	6	1	17	1	2
2	6	1	17	1	2
2	5	1	17	1	2
2	5	1	17	1	2
2	5	1	17	1	2
2	5	1	16	1	2
2	5	1	16	1	1
2	5	1	16	1	1
2	5	1	15	1	1
2	5	1	15	1	1
2	5	1	15	1	1
2	5	1	14	1	1
2	5	1	14	1	1
2	5	1	14	1	1
2	5	1	13	1	1
1	5	1	13	1	1
1	5	1	13	1	1
1	5	1	13	1	1
1	5	1	13	1	1
1	4	1	12	1	1
1	4	1	12	1	1
1	4	1	12	1	1
1	4	1	12	1	1
1	4	1	12	1	1
1	4	1	12	1	1
1	4	1	11	1	1
1	4	1	11	0	1
1	4	1	11	0	1
1	4	1	11	0	1
1	4	1	11	0	1
1	4	1	11	0	1
1	4	1	11	0	1
1	4	1	11	0	1
1	4	1	11	0	1
1	4	1	11	0	1
1	4	1	11	0	1
1	4	1	10	0	1
1	4	1	10	0	1
1	4	1	10	0	1
1	4	1	10	0	1
1	4	1	10	0	1
1	4	1	10	0	1
1	4	1	10	0	1
1	4	1	10	0	1
1	4	1	10	0	1
1	3	1	10	0	1
1	3	1	10	0	1
1	3	1	10	0	1
1	3	1	9	0	1
1	3	1	9	0	1
1	3	1	9	0	1
1	3	1	9	0	1
1	3	1	9	0	1
1	3	1	9	0	1
1	3	1	9	0	1
1	3	1	9	0	1
1	3	1	9	0	1
1	3	1	9	0	1
1	3	1	9	0	1
1	3	1	8	0	1
1	3	1	8	0	1
1	3	1	8	0	1
1	3	1	8	0	1
1	3	1	8	0	1
1	3	1	8	0	1
1	3	1	8	0	1
1	3	1	7	0	1
1	3	1	7	0	1
1	3	1	7	0	1
1	3	1	7	0	1
1	3	1	7	0	1
1	3	1	7	0	1
1	3	1	7	0	1
0	3	1	7	0	1
0	3	1	7	0	1
0	3	1	7	0	1
0	3	1	7	0	1
0	3	1	6	0	1
0	2	1	6	0	1
0	2	1	6	0	1
0	2	1	6	0	0
0	2	1	6	0	0
0	2	1	6	0	0
0	2	1	6	0	0
0	2	1	6	0	0
0	2	1	6	0	0
0	2	1	6	0	0
0	2	1	6	0	0
0	2	1	6	0	0
0	2	1	6	0	0
0	2	1	6	0	0
0	2	0	6	0	0
0	2	0	6	0	0
0	2	0	6	0	0
0	2	0	5	0	0
0	2	0	5	0	0
0	2	0	5	0	0
0	2	0	5	0	0
0	2	0	5	0	0
0	2	0	5	0	0
0	2	0	5	0	0
0	2	0	5	0	0
0	2	0	5	0	0
0	2	0	5	0	0
0	2	0	5	0	0
0	2	0	5	0	0
0	2	0	5	0	0
0	2	0	5	0	0
0	2	0	5	0	0
0	2	0	5	0	0
0	2	0	5	0	0
0	2	0	5	0	0
0	2	0	5	0	0
0	2	0	5	0	0
0	2	0	5	0	0
0	2	0	4	0	0
0	2	0	4	0	0
0	2	0	4	0	0
0	1	0	4	0	0
0	1	0	4	0	0
0	1	0	4	0	0
0	1	0	4	0	0
0	1	0	4	0	0
0	1	0	4	0	0
0	1	0	4	0	0
0	1	0	4	0	0
0	1	0	4	0	0
0	1	0	4	0	0
0	1	0	4	0	0
0	1	0	4	0	0
0	1	0	4	0	0
0	1	0	4	0	0
0	1	0	4	0	0
0	1	0	4	0	0
0	1	0	4	0	0
0	1	0	4	0	0
0	1	0	4	0	0
0	1	0	4	0	0
0	1	0	4	0	0
0	1	0	4	0	0
0	1	0	4	0	0
0	1	0	4	0	0
0	1	0	4	0	0
0	1	0	4	0	0
0	1	0	4	0	0
0	1	0	4	0	0
0	1	0	3	0	0
0	1	0	3	0	0
0	1	0	3	0	0
0	1	0	3	0	0
0	1	0	3	0	0
0	1	0	3	0	0
0	1	0	3	0	0
0	1	0	3	0	0
0	1	0	3	0	0
0	1	0	3	0	0
0	1	0	3	0	0
0	1	0	3	0	0
0	1	0	3	0	0
0	1	0	3	0	0
0	1	0	3	0	0
0	1	0	3	0	0
0	1	0	3	0	0
0	1	0	3	0	0
0	1	0	3	0	0
0	1	0	3	0	0
0	1	0	3	0	0
0	1	0	3	0	0
0	1	0	3	0	0
0	1	0	3	0	0
0	1	0	3	0	0
0	1	0	3	0	0
0	1	0	3	0	0
0	1	0	3	0	0
0	1	0	3	0	0
0	1	0	3	0	0
0	1	0	3	0	0
0	1	0	3	0	0
0	1	0	3	0	0
0	1	0	3	0	0
0	1	0	3	0	0
0	1	0	3	0	0
0	1	0	3	0	0
0	1	0	3	0	0
0	1	0	3	0	0
0	1	0	3	0	0
0	1	0	3	0	0
0	1	0	3	0	0
0	1	0	3	0	0
0	1	0	2	0	0
0	1	0	2	0	0
0	1	0	2	0	0
0	1	0	2	0	0
0	1	0	2	0	0
0	1	0	2	0	0
0	1	0	2	0	0
0	1	0	2	0	0
0	1	0	2	0	0
0	1	0	2	0	0
0	1	0	2	0	0
0	1	0	2	0	0
0	1	0	2	0	0
0	1	0	2	0	0
0	1	0	2	0	0
0	1	0	2	0	0
0	0	0	2	0	0
0	0	0	2	0	0
0	0	0	2	0	0
0	0	0	2	0	0
0	0	0	2	0	0
0	0	0	2	0	0
0	0	0	2	0	0
0	0	0	2	0	0
0	0	0	2	0	0
0	0	0	2	0	0
0	0	0	2	0	0
0	0	0	2	0	0
0	0	0	2	0	0
0	0	0	2	0	0
0	0	0	2	0	0
0	0	0	2	0	0
0	0	0	2	0	0
0	0	0	2	0	0
0	0	0	2	0	0
0	0	0	2	0	0
0	0	0	2	0	0
0	0	0	2	0	0
0	0	0	2	0	0
0	0	0	2	0	0
0	0	0	2	0	0
0	0	0	2	0	0
0	0	0	2	0	0
0	0	0	2	0	0
0	0	0	2	0	0
0	0	0	2	0	0
0	0	0	2	0	0
0	0	0	2	0	0
0	0	0	2	0	0
0	0	0	2	0	0
0	0	0	2	0	0
0	0	0	2	0	0
0	0	0	2	0	0
0	0	0	2	0	0
0	0	0	2	0	0
0	0	0	2	0	0
0	0	0	2	0	0
0	0	0	2	0	0
0	0	0	2	0	0
0	0	0	2	0	0
0	0	0	2	0	0
0	0	0	2	0	0
0	0	0	2	0	0
0	0	0	1	0	0
0	0	0	1	0	0
0	0	0	1	0	0
0	0	0	1	0	0
0	0	0	1	0	0
0	0	0	1	0	0
0	0	0	1	0	0
0	0	0	1	0	0
0	0	0	1	0	0
0	0	0	1	0	0
0	0	0	1	0	0
0	0	0	1	0	0
0	0	0	1	0	0
0	0	0	1	0	0
0	0	0	1	0	0
0	0	0	1	0	0
0	0	0	1	0	0
0	0	0	1	0	0
0	0	0	1	0	0
0	0	0	1	0	0
0	0	0	1	0	0
0	0	0	1	0	0
0	0	0	1	0	0
0	0	0	1	0	0
0	0	0	1	0	0
0	0	0	1	0	0
0	0	0	1	0	0
0	0	0	1	0	0
0	0	0	1	0	0
0	0	0	1	0	0
0	0	0	1	0	0
0	0	0	1	0	0
0	0	0	1	0	0
0	0	0	1	0	0
0	0	0	1	0	0
0	0	0	1	0	0
0	0	0	1	0	0
0	0	0	1	0	0
0	0	0	1	0	0
0	0	0	1	0	0
0	0	0	1	0	0
0	0	0	1	0	0
0	0	0	1	0	0
0	0	0	1	0	0
0	0	0	1	0	0
0	0	0	1	0	0
0	0	0	1	0	0
0	0	0	1	0	0
0	0	0	1	0	0
0	0	0	1	0	0
0	0	0	1	0	0
0	0	0	1	0	0
0	0	0	1	0	0
0	0	0	1	0	0
0	0	0	1	0	0
0	0	0	1	0	0
0	0	0	1	0	0
0	0	0	1	0	0
0	0	0	1	0	0
0	0	0	1	0	0
0	0	0	1	0	0
0	0	0	1	0	0
0	0	0	1	0	0
0	0	0	1	0	0
0	0	0	1	0	0
0	0	0	1	0	0
0	0	0	1	0	0
0	0	0	1	0	0
0	0	0	1	0	0
0	0	0	1	0	0
0	0	0	1	0	0
0	0	0	1	0	0
0	0	0	1	0	0
0	0	0	1	0	0
0	0	0	1	0	0
0	0	0	1	0	0
0	0	0	1	0	0
0	0	0	1	0	0
0	0	0	1	0	0
0	0	0	1	0	0
0	0	0	1	0	0
0	0	0	1	0	0
0	0	0	1	0	0
0	0	0	1	0	0
0	0	0	1	0	0
0	0	0	1	0	0
0	0	0	1	0	0
0	0	0	1	0	0
0	0	0	1	0	0
0	0	0	1	0	0
0	0	0	1	0	0
0	0	0	1	0	0
0	0	0	1	0	0
0	0	0	0	0	0
0	0	0	0	0	0
0	0	0	0	0	0
0	0	0	0	0	0
0	0	0	0	0	0
0	0	0	0	0	0
0	0	0	0	0	0
0	0	0	0	0	0
0	0	0	0	0	0
0	0	0	0	0	0
0	0	0	0	0	0
0	0	0	0	0	0
0	0	0	0	0	0
0	0	0	0	0	0
0	0	0	0	0	0
0	0	0	0	0	0
0	0	0	0	0	0
0	0	0	0	0	0
0	0	0	0	0	0
0	0	0	0	0	0
0	0	0	0	0	0
0	0	0	0	0	0
0	0	0	0	0	0
0	0	0	0	0	0
0	0	0	0	0	0
0	0	0	0	0	0
0	0	0	0	0	0
0	0	0	0	0	0
0	0	0	0	0	0
0	0	0	0	0	0
0	0	0	0	0	0
0	0	0	0	0	0
0	0	0	0	0	0
0	0	0	0	0	0
0	0	0	0	0	0
0	0	0	0	0	0
0	0	0	0	0	0
0	0	0	0	0	0
0	0	0	0	0	0
0	0	0	0	0	0
0	0	0	0	0	0
0	0	0	0	0	0
0	0	0	0	0	0
0	0	0	0	0	0
0	0	0	0	0	0
0	0	0	0	0	0
0	0	0	0	0	0
0	0	0	0	0	0
0	0	0	0	0	0
0	0	0	0	0	0
0	0	0	0	0	0
0	0	0	0	0	0
0	0	0	0	0	0
0	0	0	0	0	0
0	0	0	0	0	0
0	0	0	0	0	0
0	0	0	0	0	0
0	0	0	0	0	0
0	0	0	0	0	0
0	0	0	0	0	0
0	0	0	0	0	0
0	0	0	0	0	0
0	0	0	0	0	0
0	0	0	0	0	0
0	0	0	0	0	0
0	0	0	0	0	0
0	0	0	0	0	0
0	0	0	0	0	0
0	0	0	0	0	0
0	0	0	0	0	0
0	0	0	0	0	0
0	0	0	0	0	0
0	0	0	0	0	0
0	0	0	0	0	0
0	0	0	0	0	0
0	0	0	0	0	0
0	0	0	0	0	0
0	0	0	0	0	0
0	0	0	0	0	0
0	0	0	0	0	0
0	0	0	0	0	0
0	0	0	0	0	0
0	0	0	0	0	0
0	0	0	0	0	0
0	0	0	0	0	0
0	0	0	0	0	0
0	0	0	0	0	0
0	0	0	0	0	0
0	0	0	0		0
0	0	0	0		0
0	0	0	0		0
0	0	0	0		0
0	0	0	0		0
0	0	0	0		0
0	0	0	0		0
0	0	0	0		0
0	0	0	0		0
0	0	0	0		0
0	0	0	0		0
0	0	0	0		0
0	0	0	0		0
0	0	0	0		0
0	0	0	0		0
0	0	0	0		0
0	0	0	0		0
0	0	0	0		0
0	0	0	0		0
0	0	0	0		0
0	0	0	0		0
0	0	0	0		0
0	0	0	0		0
0	0	0	0		0
0	0	0	0		0
0	0	0	0		0
0	0	0	0		0
0	0	0	0		0
0	0	0	0		0
0	0	0	0		0
0	0	0	0		0
0	0	0	0		0
0	0	0	0		0
0	0	0	0		0
0	0	0	0		0
0	0	0	0		0
0	0	0	0		0
0	0	0	0		0
0	0	0	0		0
0	0	0	0		0
0	0	0	0		0
0	0	0	0		0
0	0	0	0		0
0	0	0	0		0
0	0	0	0		0
0	0	0	0		0
0	0	0	0		0
0	0	0	0		0
0	0	0	0		0
0	0	0	0		0
0	0	0	0		0
0	0	0	0		0
0	0	0	0		0
0	0	0	0		0
0	0	0	0		0
0	0	0	0		0
0	0	0	0		0
0	0	0	0		0
0	0	0	0		0
0	0	0	0		0
0	0	0	0		0
0	0	0	0		0
0	0	0	0		0
0	0	0	0		0
0	0	0	0		0
0	0	0	0		0
0	0	0	0		0
0	0	0	0		0
0	0	0	0		0
0	0	0	0		0
0	0	0	0		0
0	0	0	0		0
0	0	0	0		0
0	0	0	0		0
0	0	0	0		0
0	0	0	0		0
0	0	0	0		0
0	0	0	0
0	0	0	0
0	0	0	0
0	0	0	0
0	0	0	0
0	0	0	0
0	0	0	0
0	0	0	0
	0	0	0
	0	0	0
	0	0	0
	0	0	0
	0	0	0
	0	0	0
	0	0	0
	0	0	0
	0	0	0
	0	0	0
	0	0	0
	0	0	0
	0	0	0
	0	0	0
	0	0	0
	0	0	0
	0	0	0
	0	0	0
	0	0	0
	0	0	0
	0	0	0
	0	0	0
	0	0	0
	0	0	0
	0	0	0
	0	0	0
	0	0	0
	0	0	0
	0	0	0
	0	0	0
	0	0	0
	0	0	0
	0	0
	0	0
	0	0
	0	0
	0	0
	0	0
	0	0
	0	0
	0	0
	0	0
	0	0
	0	0
	0	0
	0	0
	0	0
	0
	0
	0
	0
	0
	0
	0
	0
	0
	0

## Sheet: Fig2-FigSuppl2 A
Glu-Tub int normalized	secretion Events
0.853858	8
1.61513	1
0.915582	5
0.750983	0
1.09047	0
1.41967	0
0.915582	5
0.699546	0
1.33737	0
0.915582	5
0.565809	4
0.534947	3
0.504085	15
0.617247	3
1.44024	0
0.617247	4
0.627534	0
0.545234	0
0.617247	0
0.576097	1
0.596672	0
0.720121	0
1.92375	0
3.78578	0
0.822995	0
0.822995	4
0.88472	4
0.822995	0
1.21392	0
1.68714	0
0.730408	7
0.987595	11
0.555522	1
1.28593	0
0.908793	15
1.12474	0
1.00777	0
0.782822	6
0.953783	0
0.764826	0
0.890798	1
1.38569	0
0.647853	0
1.82658	2
0.566871	0
1.07975	1
0.620859	1
1.07975	0
0.152965	0
2.68139	0
0.368916	0
0.917791	0
1.12474	0
0.782822	4
0.863804	5
1.46667	0
1.13519	4
1.03858	1
1.31634	3
0.821201	1
1.72694	1
0.881583	41
1.84166	3
0.990272	19
0.923851	17
0.386448	12
0.941966	13
1.03254	0
0.676283	16
0.984233	5
0.845354	5
0.821201	30
0.875545	11
0.760819	6
0.430646	0
0.133148	0
0.468483	7
1.02887	0
1.06982	1
0.337665	5
0.368658	2
0.0489451	5
0.0604481	1
3.26852	0
2.65978	0
2.70708	0
0.417936	1
1.99134	0
0.277056	0
1.93939	0
0.450216	1
0.30303	2
0.917749	2
2.5974	0
1.2381	0
0.822511	3
0.406926	0
0.623377	2
0.4329	5

## Sheet: Fig2-FigSuppl2 B
Glu-Tub int normalized	secretion Events
1.05515	0
1.16854	1
0.707401	6
1.17411	0
1.0713	0
1.84566	0
0.616115	0
0.598831	0
0.532458	0
0.93369	1
0.966078	2
0.805228	1
1.48939	0
1.56051	0
0.906207	1
0.541918	0
1.26773	0
0.759682	6
1.44466	1
0.533917	6
0.704645	4
0.956548	0
1.13517	0
0.694608	0
0.90607	2
0.917764	0
1.37645	0
1.33016	0
1.11266	3
0.534625	0
1.28712	1
0.360161	15
0.766018	4
0.528661	8
1.22236	3
2.11076	2
1.8768	1
0.624353	10
1.71621	1
0.818094	5
0.52665	1
0.657221	8
0.858312	4
1.5519	1
1.07184	1
1.76495	1
1.16131	1
0.649619	0
0.701109	0
0.615878	3
0.840374	1
1.12302	0
1.58831	1
0.922031	0
0.908219	0
1.02331	0
0.527498	0
1.13986	0
0.554333	0
0.771317	2
0.600007	0
1.01786	0
0.955287	0
1.52482	0
1.26223	0
0.724916
1.28913	2
1.79664	2
1.28595	2
1.02052	0
0.759864	6
2.7363	0
0.913547	2
0.740863	0
1.41642	0
0.691255	5
0.44929	2
0.925339	3
0.60224	1
0.392899	0
0.403927	1
0.693882	1
1.84475	0
0.424913	2
0.405974	3
0.619346	0
0.401514	0
1.17024	2
2.59768	0
0.41752	1
1.19677	1
1.34352	0
1.52908	1
1.70312	1
1.67758	0
0.460026	3
0.489576	3
0.75853	1
0.688161	0
0.465285	2
0.720466	6
0.655356	0
1.88042	0
0.520378	0
0.72322	0
0.844926	1
0.809616	3
1.07607	2
1.66506	0
0.792838	1
1.47936	0
0.789965	2
0.644263	7
0.496209	1
0.616034	3
0.731596	1
0.738359	1
0.593686	0
1.40688	17
2.27639	0
1.41776	0
1.08372	0
1.58875	1
0.137027	0

## Sheet: Fig2-FigSuppl2 C
Total Counts GluTub<1	Total Counts GluTub>1
6	0							Mann-Whittney non-parametric comparison test p-value is shown.
0	1
0	0							Table Analyzed
0	0
1	0							Column B	Total Counts GluTub>1
2	0							vs.	vs.
1	0							Column A	Total Counts GluTub<1
1	0
0	1							Mann Whitney test
6	0							P value	0.0026
6	0							Exact or approximate P value?	Exact
4	0							P value summary	**
0	3							Significantly different (P < 0.05)?	Yes
0	1							One- or two-tailed P value?	Two-tailed
2	3							Sum of ranks in column A,B	4956 , 2670
0	2							Mann-Whitney U	1292
0	1
15	1							Difference between medians
4	1							Median of column A	1.000, n=71
8	1							Median of column B	0.000, n=52
10	1							Difference: Actual	-1
5	1							Difference: Hodges-Lehmann	-1
1	0
8	1
4	0
0	0
0	0
3	0
1	0
0	2
0	2
0	2
0	0
2	0
0	0
0	0
	2
6	0
2	1
0	0
5	1
2	1
3	0
1	0
0	2
1	0
1	0
2	17
3	0
0	0
0	0
1	1
3
3
1
0
2
6
0
0
0
1
3
1
2
7
1
3
1
1
0
0
