# Supplementary material for: Microtubules regulate pancreatic β-cell heterogeneity via spatiotemporal control of insulin secretion hot spots
Source: eLife. 2021 Nov 16;10:e59912. doi: 10.7554/eLife.59912 (PMC8635970; doi:10.7554/eLife.59912)
Supplement: Figure 3—source data 1. — Each data set is a separate sheet. [file elife-59912-fig3-data1.xlsx]

## Sheet: Figure 3A
Control Low	Control High	Noc Low	Noc High	Taxol Low	Taxol High		Distance (um)	Control Low	Control High	Noc Low	Noc High	Taxol Low	Taxol High
14.6083	18.8942	14.4568	14.874	14.1742	13.6235		0-0.5	17.9688	21.7784	18.7755	30.2304	30.8901	32.8947
14.6083	15.2034	11.7978	14.666	10.5224	9.7718		0.5-1.0	16.6667	25.0188	22.449	27.957	14.1361	18.1579
14.3198	14.0945	10.8812	13.7684	10.5224	9.2316		1.0-1.5	20.0521	16.6541	13.8776	14.6851	10.4712	16.3158
11.9412	14.0945	10.8812	12.4523	10.0462	9.21078		1.5-2.0	9.89583	8.28937	13.8776	7.61905	7.32984	5.78947
11.9412	13.8915	9.66644	12.1695	8.89116	9.21078		2.0-2.5	9.63542	7.61115	6.12245	4.91551	5.75916	6.31579
10.9375	13.3674	9.6346	12.1695	8.10175	9.07639		2.5-3.0	5.46875	4.67219	4.08163	3.31797	5.2356	3.68421
10.9375	12.9797	9.50621	11.8929	7.58778	8.97427		3.0-3.5	3.38542	3.08968	2.85714	2.15054	4.18848	3.94737
10.3901	12.825	9.50621	11.8929	7.58778	8.34458		3.5-4.0	2.60417	2.71289	2.44898	1.87404	6.80628	2.36842
10.1319	12.7167	9.44949	11.5743	6.47358	8.34458		4.0-4.5	3.90625	2.03466	3.67347	0.921659	3.66492	2.10526
9.63328	12.7167	8.87531	11.5743	6.36993	7.21598		4.5-5.0	2.34375	1.58252	0.408163	1.56682	0.52356	1.05263
9.63328	11.5644	8.87531	10.6961	6.36993	6.97057		5.0-5.5	1.04167	1.20573	0.816327	1.22888	3.66492	2.10526
9.57062	11.3701	8.87531	10.6373	5.82409	6.88186		5.5-6.0	0.78125	1.20573	1.22449	0.522273	1.57068	1.05263
9.4549	11.316	8.87387	10.6373	5.82409	6.47951		6.0-6.5	0	0.452148	1.63265	0.675883	1.57068	1.05263
7.98879	10.2625	8.7343	10.4601	5.79545	6.47951		6.5-7.0	1.04167	0.602864	0	0.460829	0	0.526316
7.98879	10.1924	8.7343	9.78096	5.34716	6.12405		7.0-7.5	0	0.602864	0.816327	0.399386	0	0.263158
7.9438	10.1924	7.96311	9.78096	5.34716	6.12405		7.5-8.0	1.82292	0.37679	0.816327	0.245776	1.04712	0
7.91636	10.1849	7.96311	9.63328	5.31865	5.99093		8.0-8.5	0	0.075358	0	0.184332	0.52356	0.526316
7.62144	10.1823	7.28659	9.47249	5.24107	5.83945		8.5-9.0	0	0.226074	2.44898	0.276498	0.52356	0.263158
7.5217	9.91742	7.28659	9.47249	5.24107	5.83945		9.0-9.5	0.260417	0.226074	0.408163	0.276498	0	1.05263
7.51319	9.89545	6.3053	9.39106	5.24107	5.52033		9.5-10.0	0.78125	0.226074	1.63265	0.0921659	0	0.263158
6.90229	9.89545	6.3053	9.32952	5.15984	5.43294		>10	2.34375	1.35644	1.63265	0.430108	2.09424	0.263158
6.61441	9.34734	6.30327	9.32952	4.8	5.43294
6.61441	9.34734	6.08	9.3103	4.48286	5.39748		% 0-1.5	54.6875	63.4514	55.102	72.8725	55.4974	67.3684
6.56195	9.16341	5.7355	9.2205	4.48286	5.24839
5.92864	8.7299	5.67493	9.15502	4.40218	5.14245
5.66138	8.7299	5.5171	9.00844	4.40218	5.14245
5.66138	8.71816	5.4494	8.95142	4.30813	5.14245
5.36656	8.33383	5.4494	8.83629	4.0287	5.1225
5.36656	7.87909	4.77326	8.80582	4.0287	4.97803
5.30177	7.87909	4.48286	8.77086	3.96141	4.97803
5.10498	7.82038	4.45708	8.77086	3.96141	4.64276
4.89767	7.74638	4.45708	8.66367	3.89625	4.52548
4.89767	7.72321	4.39345	8.66367	3.89625	4.30516
4.87672	7.18754	4.39345	8.57606	3.86988	4.23622
4.86621	7.11464	4.25131	8.57606	3.84333	4.23622
4.86621	7.11464	4.15384	8.38437	3.84	4.16
4.84248	7.08712	4.03822	8.24738	3.84	4.16
4.84248	7.08712	4.03822	8.14901	3.65207	4.07922
4.61788	7.08712	3.89297	8.03512	3.65207	4.03822
4.61788	7.04727	3.89297	8.0064	3.52363	4.01278
4.48286	7.03454	3.79305	8.0064	3.51272	3.79305
4.43694	6.98891	3.79305	7.9438	3.51272	3.57771
4.43694	6.94665	3.74892	7.87909	3.46133	3.57771
4.43694	6.92636	3.62039	7.87909	3.46133	3.55258
4.4138	6.9097	3.3752	7.81383	3.3752	3.52363
4.4138	6.8483	3.3752	7.79251	3.3752	3.52363
4.36715	6.66069	3.21994	7.76783	3.23975	3.50907
4.35247	6.59115	3.10664	7.65663	3.1435	3.50907
4.30813	6.53067	3.07766	7.58778	3.1435	3.50907
4.26933	6.43192	3.01887	7.49101	3.01887	3.40165
4.26033	6.32961	3.01887	7.42234	2.89772	3.40165
4.11359	6.32961	2.94156	7.42234	2.86217	3.40165
4.11359	6.22357	2.88444	7.39643	2.7546	3.26337
4.07922	6.09262	2.7247	7.39643	2.7546	3.26337
4.01278	6.09262	2.7247	7.38777	2.73408	3.23975
3.9061	5.81749	2.63879	7.38777	2.73408	3.15569
3.74892	5.81749	2.58488	7.37043	2.7247	3.15569
3.74892	5.79986	2.58488	7.31114	2.66293	3.15569
3.74892	5.79545	2.57992	7.29888	2.59256	3.15569
3.74892	5.79545	2.57992	7.19111	2.5044	3.04421
3.74892	5.76222	2.5044	7.08531	2.49928	3.04421
3.55258	5.7355	2.49928	7.06903	2.4	3.04
3.54175	5.68169	2.49928	6.95402	2.32964	3.00613
3.54175	5.67493	2.44753	6.94665	2.29085	3.00613
3.51272	5.62736	2.44753	6.9097	2.27403	2.95025
3.46133	5.62736	2.40533	6.88186	2.22279	2.95025
3.46133	5.60229	2.40533	6.8483	2.22279	2.88444
3.40165	5.5541	2.37857	6.8483	2.14663	2.88444
3.26337	5.50549	2.37857	6.8352	2.14663	2.86217
3.26337	5.50549	2.30755	6.8352	2.08614	2.86217
3.26337	5.50549	2.30755	6.68371	2.08614	2.79886
3.26337	5.47284	2.24571	6.68371	1.92666	2.79886
3.26337	5.47284	2.22279	6.58337	1.92666	2.76203
3.204	5.44235	2.17624	6.5678	1.92666	2.72
3.17591	5.44235	2.17624	6.56	1.78885	2.71529
3.03579	5.37848	2.13467	6.56	1.72325	2.60461
3.00613	5.36418	1.93329	6.56	1.72325	2.60461
3.00613	5.22394	1.92	6.48346	1.6473	2.58488
2.98905	5.22394	1.92	6.37595	1.62035	2.49928
2.93721	5.20922	1.92	6.32961	1.57582	2.4
2.88444	5.19199	1.92	6.27273	1.57582	2.4
2.88444	5.14245	1.92	6.27273	1.57582	2.4
2.79428	5.08488	1.87275	6.21328	1.57582	2.37857
2.79428	5.08488	1.82428	6.21328	1.57582	2.37857
2.7247	5.05964	1.82428	6.13241	1.57582	2.32964
2.72	5.05964	1.82428	6.12614	1.47513	2.29085
2.68209	5.05964	1.81019	6.12614	1.44886	2.26274
2.64847	4.98317	1.78885	6.11359	1.36704	2.22854
2.64847	4.93931	1.78885	6.09262	1.36704	2.17624
2.64847	4.86621	1.76726	6.0821	1.29628	2.08614
2.64847	4.86621	1.76	6.03775	1.28996	2.08614
2.60461	4.86621	1.72325	6.03775	1.13425	2.08
2.60461	4.86621	1.72325	6.02289	1.13425	2.08
2.57992	4.83719	1.70082	6.02289	1.13425	2.08
2.57992	4.80267	1.67045	5.94589	1.13425	2.08
2.57992	4.8	1.67045	5.92	1.13137	2.049
2.52982	4.70574	1.67045	5.88313	1.13137	2.03647
2.52982	4.66476	1.67045	5.82409	1.07331	2.03647
2.5044	4.65102	1.67045	5.81529	1.07331	2.02386
2.44229	4.65102	1.63169	5.79765	1.0245	2.02386
2.43705	4.65102	1.60798	5.76888	1.0245	2.02386
2.43705	4.65102	1.6	5.76888	1.01193	2.02386
2.43705	4.61511	1.6	5.76888	1.01193	1.95305
2.43705	4.61511	1.57582	5.7355	1.01193	1.95305
2.43705	4.51699	1.57582	5.71762	1.01193	1.93329
2.43705	4.50848	1.57582	5.71762	0.97221	1.82428
2.42124	4.50564	1.57582	5.67493	0.97221	1.82428
2.42124	4.50564	1.51789	5.65685	0.96	1.82428
2.40533	4.44846	1.50944	5.60914	0.96	1.82428
2.40533	4.42538	1.50944	5.6	0.96	1.82428
2.32964	4.42538	1.47513	5.58856	0.96	1.82428
2.32964	4.39345	1.47513	5.5541	0.932952	1.78885
2.32964	4.36715	1.43108	5.5541	0.932952	1.73066
2.27403	4.35247	1.36704	5.5541	0.861626	1.70082
2.27403	4.34658	1.28996	5.50549	0.861626	1.67045
2.26274	4.34658	1.28996	5.47752	0.8	1.6473
2.26274	4.33184	1.28996	5.47752	0.8	1.6473
2.24	4.33184	1.28996	5.46114	0.715542	1.6473
2.22854	4.30813	1.16482	5.46114	0.715542	1.60798
2.17624	4.30813	1.16482	5.44	0.678823	1.60798
2.17624	4.30516	1.16482	5.37848	0.678823	1.51789
2.17624	4.29325	1.15378	5.37848	0.659697	1.51789
2.17624	4.26033	1.15378	5.37848	0.659697	1.51789
2.17624	4.26033	1.15378	5.36418	0.64814	1.51789
2.15258	4.26033	1.15378	5.36418	0.64814	1.47513
2.13467	4.25131	1.13137	5.31865	0.64814	1.47513
2.10447	4.1876	1.13137	5.31865	0.576888	1.44886
2.08614	4.16	1.13137	5.31865	0.576888	1.44886
2.08614	4.16	1.12	5.31865	0.505964	1.44886
2.08	4.12912	1.07331	5.31865	0.505964	1.44886
2.049	4.12912	1.07331	5.31865	0.505964	1.44886
2.03647	4.11359	1.07331	5.30177	0.505964	1.44886
2.03647	4.07922	1.07331	5.263	0.486105	1.44886
2.02386	4.07922	1.0245	5.24107	0.486105	1.44
2.00479	4.05088	1.0245	5.24107	0.486105	1.44
2.00479	4	1.0245	5.24107	0.486105	1.43108
1.95305	4	1.0245	5.23129	0.486105	1.43108
1.94648	3.97432	1.01193	5.22394	0.48	1.43108
1.94648	3.97432	1.01193	5.22394	0.48	1.43108
1.93329	3.97432	1.01193	5.22394	0.48	1.36704
1.92666	3.97432	1.01193	5.1648	0.48	1.31939
1.92666	3.95171	1.01193	5.1648	0.452548	1.31939
1.92666	3.86657	1.01193	5.15984	0.452548	1.31939
1.92666	3.86657	1.01193	5.15984	0.452548	1.28996
1.87275	3.86657	0.973242	5.14245	0.357771	1.28996
1.87275	3.85331	0.973242	5.12999	0.357771	1.28996
1.87275	3.85331	0.973242	5.10498	0.357771	1.28996
1.87275	3.84666	0.973242	5.08488	0.357771	1.28996
1.78885	3.79305	0.973242	5.08488	0.357771	1.28996
1.78885	3.79305	0.973242	5.0241	0.357771	1.28996
1.78885	3.79305	0.973242	5.0241	0.357771	1.28996
1.76726	3.79305	0.973242	5.0241	0.32407	1.28996
1.76726	3.77614	0.973242	5.01135	0.32407	1.28996
1.76	3.73524	0.932952	5.01135	0.32407	1.28996
1.73066	3.73181	0.932952	5.01135	0.32407	1.28996
1.72325	3.73181	0.932952	4.96258	0.32407	1.28996
1.72325	3.73181	0.932952	4.96258	0.32407	1.28996
1.72325	3.72151	0.932952	4.92893	0.32407	1.28
1.70082	3.71117	0.932952	4.92893	0.32407	1.28
1.70082	3.57771	0.861626	4.92893	0.32407	1.28
1.70082	3.55258	0.861626	4.90812	0.32407	1.28
1.70082	3.55258	0.861626	4.89506	0.32	1.24964
1.67045	3.54175	0.861626	4.88459	0.32	1.21852
1.67045	3.51272	0.861626	4.88459	0.32	1.21852
1.6473	3.51272	0.815843	4.86621	0.32	1.21852
1.6473	3.50907	0.815843	4.86621	0.32	1.16482
1.6	3.50907	0.815843	4.86621	0.32	1.16482
1.6	3.50907	0.815843	4.86621	0.32	1.15378
1.6	3.50907	0.8	4.86621	0.32	1.15378
1.6	3.50907	0.715542	4.83719	0.226274	1.15378
1.6	3.50907	0.715542	4.81331	0.226274	1.15378
1.58392	3.49445	0.715542	4.81331	0.226274	1.13137
1.51789	3.45393	0.715542	4.80267	0.226274	1.12
1.51789	3.45393	0.715542	4.80267	0.226274	1.12
1.47513	3.42415	0.715542	4.79466	0.162035	1.07331
1.47513	3.42415	0.715542	4.77326	0.162035	1.07331
1.47513	3.42041	0.715542	4.77326	0.162035	1.07331
1.44886	3.39411	0.678823	4.75714	0.162035	1.0245
1.44886	3.29848	0.678823	4.75714	0.162035	1.0245
1.44886	3.29848	0.678823	4.72745	0.162035	1.0245
1.44886	3.29848	0.678823	4.70574	0.162035	1.0245
1.44886	3.29848	0.659697	4.70574	0.16	1.0245
1.44886	3.29848	0.659697	4.70574	0.16	1.0245
1.44886	3.29848	0.659697	4.70574	0.16	1.01193
1.44886	3.28293	0.659697	4.66476	0.16	1.01193
1.44	3.28293	0.659697	4.66476	0.16	1.01193
1.44	3.28293	0.659697	4.66476	0.16	0.973242
1.44	3.28293	0.659697	4.65927	0	0.973242
1.44	3.23975	0.659697	4.65102	0	0.973242
1.43108	3.23975	0.64	4.65102	0	0.96
1.43108	3.23975	0.64	4.65102	0	0.932952
1.43108	3.21994	0.576888	4.64276		0.932952
1.36704	3.21994	0.576888	4.5845		0.905097
1.36704	3.21596	0.576888	4.5845		0.905097
1.36704	3.21596	0.576888	4.5817		0.861626
1.31939	3.204	0.576888	4.5817		0.861626
1.31939	3.204	0.505964	4.5817		0.861626
1.31939	3.2	0.505964	4.5817		0.861626
1.28996	3.17591	0.505964	4.5817		0.861626
1.28996	3.17591	0.48	4.54805		0.861626
1.28996	3.17591	0.48	4.52831		0.861626
1.28	3.17591	0.48	4.52831		0.861626
1.28	3.16784	0.48	4.52548		0.815843
1.24964	3.15569	0.48	4.52548		0.815843
1.21852	3.10664	0.48	4.50848		0.815843
1.21852	3.09011	0.452548	4.50848		0.815843
1.21852	3.0568	0.452548	4.49141		0.8
1.21852	3.0568	0.452548	4.49141		0.8
1.16482	3.0568	0.452548	4.46282		0.8
1.16482	3.01887	0.357771	4.44846		0.8
1.15378	3.00613	0.357771	4.40218		0.8
1.15378	3.00613	0.357771	4.39345		0.8
1.15378	2.97617	0.357771	4.35247		0.8
1.15378	2.97617	0.357771	4.33184		0.8
1.15378	2.97617	0.357771	4.32296		0.8
1.15378	2.95025	0.357771	4.30813		0.8
1.13137	2.95025	0.357771	4.30813		0.715542
1.13137	2.95025	0.357771	4.30516		0.715542
1.13137	2.95025	0.357771	4.25131		0.715542
1.13137	2.94156	0.32	4.25131		0.715542
1.13137	2.94156	0.32	4.23622		0.715542
1.12	2.94156	0.32	4.22715		0.715542
1.12	2.93721	0.32	4.22715		0.678823
1.07331	2.93721	0.32	4.22412		0.678823
1.07331	2.93721	0.32	4.22412		0.678823
1.07331	2.93721	0.32	4.20894		0.659697
1.07331	2.91973	0.32	4.19981		0.659697
1.07331	2.91973	0.226274	4.19981		0.659697
1.07331	2.91973	0.226274	4.1876		0.659697
1.07331	2.91973	0.226274	4.17229		0.659697
1.07331	2.91973	0.226274	4.16		0.576888
1.0245	2.88444	0.226274	4.15384		0.576888
1.0245	2.88444	0.226274	4.15384		0.576888
1.0245	2.88	0.226274	4.12912		0.576888
1.0245	2.84872	0.226274	4.07922		0.576888
1.0245	2.79886	0.16	4		0.576888
1.0245	2.79886	0.16	3.95171		0.576888
1.0245	2.79886	0.16	3.95171		0.576888
1.0245	2.79428	0.16	3.93548		0.576888
1.01193	2.79428	0.16	3.93548		0.576888
1.01193	2.79428	0.16	3.9061		0.576888
1.01193	2.79428	0.16	3.89297		0.576888
1.01193	2.79428	0.16	3.89297		0.576888
1.01193	2.76203	0	3.89297		0.576888
1.01193	2.73408	0	3.89297		0.505964
1.01193	2.73408		3.89297		0.505964
1.01193	2.7247		3.87319		0.505964
1.01193	2.7247		3.86988		0.505964
1.01193	2.7247		3.86988		0.505964
1.01193	2.72		3.85331		0.505964
1.01193	2.72		3.85331		0.505964
0.973242	2.72		3.84666		0.505964
0.973242	2.72		3.84333		0.505964
0.96	2.71529		3.84		0.505964
0.96	2.68209		3.8166		0.505964
0.932952	2.66293		3.80316		0.48
0.932952	2.63879		3.79305		0.48
0.932952	2.6242		3.79305		0.48
0.932952	2.6242		3.77614		0.48
0.905097	2.6242		3.76595		0.48
0.905097	2.60461		3.74892		0.452548
0.905097	2.60461		3.74892		0.452548
0.905097	2.60461		3.74892		0.452548
0.905097	2.58488		3.7455		0.452548
0.861626	2.58488		3.73524		0.452548
0.861626	2.58488		3.73524		0.452548
0.861626	2.58488		3.73181		0.452548
0.861626	2.57992		3.73181		0.452548
0.815843	2.57992		3.72151		0.452548
0.815843	2.57992		3.69389		0.452548
0.815843	2.565		3.69389		0.452548
0.815843	2.565		3.65557		0.452548
0.815843	2.52982		3.65557		0.452548
0.815843	2.52982		3.65557		0.452548
0.815843	2.49928		3.65557		0.357771
0.8	2.49928		3.64856		0.357771
0.8	2.49928		3.62745		0.357771
0.8	2.49928		3.62039		0.357771
0.715542	2.48902		3.62039		0.357771
0.715542	2.48902		3.60976		0.357771
0.715542	2.48387		3.59555		0.357771
0.678823	2.44753		3.57771		0.357771
0.678823	2.44753		3.57771		0.357771
0.678823	2.44753		3.57771		0.357771
0.678823	2.44753		3.57771		0.357771
0.659697	2.44753		3.57771		0.357771
0.659697	2.44753		3.53452		0.357771
0.659697	2.43705		3.53452		0.32
0.659697	2.43705		3.52363		0.32
0.659697	2.43705		3.52363		0.32
0.659697	2.43705		3.52363		0.32
0.659697	2.42124		3.52363		0.32
0.659697	2.40533		3.52		0.32
0.659697	2.40533		3.52		0.32
0.659697	2.37857		3.51272		0.32
0.659697	2.36237		3.51272		0.32
0.659697	2.36237		3.51272		0.32
0.659697	2.36237		3.49445		0.32
0.659697	2.30755		3.46133		0.32
0.64	2.30755		3.45393		0.226274
0.64	2.30755		3.45393		0.226274
0.64	2.30755		3.45393		0.226274
0.64	2.30755		3.45393		0.226274
0.64	2.30755		3.45393		0.226274
0.576888	2.29085		3.42415		0.226274
0.576888	2.29085		3.42041		0.226274
0.505964	2.27403		3.42041		0.226274
0.505964	2.27403		3.40165		0.226274
0.505964	2.27403		3.40165		0.226274
0.505964	2.27403		3.39034		0.226274
0.505964	2.27403		3.3752		0.226274
0.505964	2.26274		3.3752		0.226274
0.505964	2.26274		3.3752		0.226274
0.505964	2.26274		3.3752		0.226274
0.505964	2.26274		3.3752		0.226274
0.48	2.24571		3.36		0.226274
0.48	2.24		3.36		0.226274
0.48	2.24		3.3409		0.226274
0.48	2.24		3.3409		0.226274
0.48	2.22854		3.3409		0.16
0.48	2.22854		3.29848		0.16
0.48	2.22854		3.29848		0.16
0.48	2.22854		3.29848		0.16
0.48	2.22854		3.2946		0.16
0.48	2.22854		3.2946		0.16
0.452548	2.22854		3.2946		0.16
0.452548	2.22854		3.28293		0.16
0.452548	2.22854		3.26337		0.16
0.452548	2.22854		3.26337		0.16
0.357771	2.22279		3.23975		0.16
0.357771	2.22279		3.23975		0.16
0.357771	2.22279		3.2358		0.16
0.357771	2.22279		3.2358		0.16
0.357771	2.17624		3.21994		0.16
0.357771	2.17624		3.21994		0.16
0.357771	2.15258		3.21994		0.16
0.357771	2.15258		3.21994		0.16
0.357771	2.15258		3.21596		0.16
0.357771	2.14663		3.21596		0.16
0.357771	2.14663		3.21596		0.16
0.357771	2.14663		3.21596		0.16
0.357771	2.13467		3.204		0.16
0.357771	2.13467		3.2		0.16
0.357771	2.10447		3.18798		0.16
0.357771	2.10447		3.15569		0.16
0.357771	2.10447		3.1435		0.16
0.357771	2.10447		3.1435		0.16
0.357771	2.08614		3.1435		0.16
0.357771	2.08614		3.10664		0.16
0.357771	2.08614		3.10664		0.16
0.32	2.08		3.10664		0.16
0.32	2.08		3.09011		0.16
0.32	2.08		3.09011		0.16
0.32	2.08		3.09011		0.16
0.32	2.08		3.07766		0.16
0.32	2.08		3.07766		0.16
0.226274	2.08		3.07766		0.16
0.226274	2.08		3.0735		0.16
0.16	2.08		3.0735		0.16
0.16	2.08		3.0568		0.16
0.16	2.049		3.04421		0.16
0.16	2.049		3.04421		0.16
0.16	2.049		3.04421		0.16
0.16	2.049		3.04		0.16
0.16	2.02386		3.04		0.16
0.16	2.02386		3.00613		0.16
0.16	2.02386		3.00613		0.16
0.16	2.02386		2.98905		0.16
0.16	2.00479		2.98905		0.16
0	2.00479		2.98905		0
0	2.00479		2.97617		0
0	2.00479		2.97617		0
0	2.00479		2.95025		0
0	2.00479		2.95025		0
0	2.00479		2.95025		0
0	1.97909		2.95025		0
0	1.95305		2.94156		0
0	1.95305		2.94156		0
0	1.95305		2.94156		0
0	1.95305		2.93721		0
0	1.94648		2.93721
0	1.94648		2.91973
0	1.94648		2.91973
0	1.94648		2.91973
	1.94648		2.89772
	1.93329		2.89772
	1.93329		2.89772
	1.93329		2.89772
	1.92666		2.89772
	1.92666		2.88444
	1.92666		2.88444
	1.92666		2.88444
	1.92		2.88444
	1.87275		2.88444
	1.87275		2.88444
	1.87275		2.88444
	1.87275		2.88444
	1.87275		2.88444
	1.87275		2.88444
	1.87275		2.88
	1.87275		2.86217
	1.8659		2.86217
	1.8659		2.86217
	1.8659		2.84872
	1.82428		2.84872
	1.82428		2.84872
	1.82428		2.83069
	1.82428		2.79886
	1.82428		2.79886
	1.82428		2.79428
	1.82428		2.76203
	1.81019		2.75274
	1.78885		2.75274
	1.78885		2.75274
	1.78885		2.75274
	1.78885		2.73876
	1.76726		2.73408
	1.76726		2.73408
	1.76		2.73408
	1.73066		2.7247
	1.73066		2.7247
	1.73066		2.7247
	1.73066		2.7247
	1.72325		2.72
	1.72325		2.72
	1.70082		2.72
	1.70082		2.71529
	1.70082		2.66293
	1.70082		2.64847
	1.70082		2.64847
	1.70082		2.63879
	1.67045		2.63879
	1.67045		2.6242
	1.67045		2.6242
	1.67045		2.60461
	1.67045		2.60461
	1.67045		2.60461
	1.6473		2.60461
	1.6473		2.58488
	1.6473		2.57992
	1.6473		2.57992
	1.6473		2.57992
	1.6473		2.57992
	1.6473		2.57992
	1.6473		2.57992
	1.6473		2.57992
	1.6473		2.565
	1.6473		2.565
	1.6473		2.565
	1.63169		2.565
	1.63169		2.565
	1.63169		2.56
	1.63169		2.56
	1.63169		2.56
	1.63169		2.56
	1.63169		2.52982
	1.63169		2.52982
	1.60798		2.52982
	1.60798		2.52982
	1.60798		2.52982
	1.60798		2.52982
	1.60798		2.52982
	1.60798		2.52982
	1.60798		2.52982
	1.60798		2.52982
	1.60798		2.52982
	1.6		2.52982
	1.6		2.52982
	1.58392		2.5044
	1.57582		2.5044
	1.57582		2.5044
	1.57582		2.5044
	1.57582		2.5044
	1.57582		2.5044
	1.50944		2.5044
	1.50944		2.49928
	1.50944		2.49928
	1.50944		2.48387
	1.50944		2.48387
	1.50944		2.44753
	1.50944		2.44753
	1.50944		2.44753
	1.50944		2.44753
	1.50944		2.44229
	1.50944		2.44229
	1.47513		2.44229
	1.47513		2.44229
	1.47513		2.43705
	1.47513		2.43705
	1.47513		2.43705
	1.47513		2.42124
	1.47513		2.42124
	1.47513		2.4
	1.47513		2.4
	1.47513		2.4
	1.47513		2.4
	1.47513		2.4
	1.47513		2.4
	1.47513		2.4
	1.47513		2.4
	1.47513		2.37857
	1.47513		2.37857
	1.47513		2.37857
	1.47513		2.37857
	1.47513		2.36237
	1.47513		2.36237
	1.47513		2.32964
	1.47513		2.32964
	1.44886		2.30755
	1.44886		2.30755
	1.44886		2.29085
	1.44886		2.29085
	1.44886		2.29085
	1.44886		2.29085
	1.44886		2.27403
	1.44886		2.27403
	1.44886		2.27403
	1.44886		2.27403
	1.44886		2.27403
	1.44		2.27403
	1.44		2.27403
	1.44		2.27403
	1.44		2.27403
	1.43108		2.27403
	1.43108		2.26274
	1.43108		2.26274
	1.43108		2.26274
	1.37637		2.26274
	1.37637		2.26274
	1.37637		2.26274
	1.37637		2.26274
	1.36704		2.26274
	1.36704		2.24571
	1.36704		2.24571
	1.36704		2.24571
	1.36704		2.24571
	1.36704		2.24571
	1.36704		2.24571
	1.36704		2.24571
	1.36704		2.24571
	1.36704		2.24571
	1.36704		2.24
	1.36704		2.24
	1.36704		2.22854
	1.35765		2.22854
	1.35765		2.22854
	1.35765		2.22854
	1.35765		2.22854
	1.35765		2.22854
	1.31939		2.22279
	1.31939		2.22279
	1.31939		2.22279
	1.31939		2.17624
	1.28996		2.17624
	1.28996		2.17624
	1.28996		2.17624
	1.28996		2.17624
	1.28996		2.17624
	1.28996		2.17624
	1.28996		2.17624
	1.28996		2.17624
	1.28996		2.17624
	1.28996		2.17624
	1.28996		2.17624
	1.28996		2.17624
	1.28996		2.17624
	1.28996		2.17624
	1.28996		2.15258
	1.28996		2.15258
	1.28996		2.15258
	1.28996		2.15258
	1.28996		2.15258
	1.28996		2.15258
	1.28996		2.14663
	1.28996		2.14663
	1.28996		2.14663
	1.28996		2.14663
	1.28		2.14663
	1.28		2.14663
	1.28		2.14663
	1.28		2.14663
	1.28		2.13467
	1.28		2.13467
	1.28		2.13467
	1.24964		2.13467
	1.24964		2.13467
	1.24964		2.10447
	1.24964		2.10447
	1.24964		2.10447
	1.24964		2.08614
	1.24964		2.08614
	1.21852		2.08614
	1.21852		2.08614
	1.21852		2.08614
	1.21852		2.08614
	1.21852		2.08614
	1.21852		2.08614
	1.21852		2.08614
	1.21852		2.08614
	1.21852		2.08614
	1.21852		2.08614
	1.21852		2.08
	1.16482		2.08
	1.16482		2.08
	1.16482		2.08
	1.16482		2.08
	1.16482		2.08
	1.16482		2.08
	1.16482		2.08
	1.16482		2.08
	1.16482		2.08
	1.16482		2.08
	1.15378		2.049
	1.15378		2.049
	1.15378		2.049
	1.15378		2.049
	1.15378		2.03647
	1.15378		2.03647
	1.15378		2.03647
	1.15378		2.02386
	1.15378		2.02386
	1.15378		2.00479
	1.15378		2.00479
	1.15378		2.00479
	1.15378		2.00479
	1.15378		2.00479
	1.15378		2.00479
	1.15378		2.00479
	1.15378		2.00479
	1.13137		2.00479
	1.13137		2.00479
	1.13137		2.00479
	1.13137		2.00479
	1.13137		2.00479
	1.13137		2.00479
	1.13137		1.97909
	1.13137		1.97909
	1.13137		1.97909
	1.13137		1.97909
	1.13137		1.97909
	1.13137		1.97909
	1.13137		1.97909
	1.13137		1.95305
	1.13137		1.95305
	1.13137		1.95305
	1.13137		1.95305
	1.13137		1.95305
	1.12		1.95305
	1.12		1.95305
	1.12		1.95305
	1.12		1.93329
	1.07331		1.93329
	1.07331		1.93329
	1.07331		1.93329
	1.07331		1.93329
	1.07331		1.93329
	1.07331		1.93329
	1.07331		1.92666
	1.07331		1.92666
	1.07331		1.92666
	1.0245		1.92666
	1.0245		1.92666
	1.0245		1.92666
	1.0245		1.92666
	1.0245		1.92666
	1.0245		1.92666
	1.0245		1.92666
	1.0245		1.92666
	1.0245		1.92666
	1.0245		1.92666
	1.0245		1.92666
	1.0245		1.92666
	1.0245		1.92666
	1.0245		1.92666
	1.0245		1.92
	1.0245		1.92
	1.0245		1.92
	1.0245		1.87275
	1.0245		1.87275
	1.0245		1.87275
	1.0245		1.87275
	1.0245		1.87275
	1.0245		1.87275
	1.0245		1.87275
	1.0245		1.87275
	1.0245		1.87275
	1.01193		1.87275
	1.01193		1.87275
	1.01193		1.8659
	1.01193		1.8659
	1.01193		1.8659
	1.01193		1.8659
	1.01193		1.82428
	1.01193		1.82428
	1.01193		1.82428
	1.01193		1.82428
	1.01193		1.82428
	1.01193		1.82428
	1.01193		1.82428
	1.01193		1.82428
	1.01193		1.82428
	1.01193		1.82428
	1.01193		1.82428
	1.01193		1.82428
	1.01193		1.82428
	1.01193		1.82428
	0.973242		1.82428
	0.973242		1.82428
	0.973242		1.82428
	0.973242		1.82428
	0.973242		1.82428
	0.973242		1.82428
	0.973242		1.82428
	0.973242		1.81019
	0.973242		1.81019
	0.973242		1.81019
	0.973242		1.81019
	0.973242		1.81019
	0.973242		1.81019
	0.973242		1.81019
	0.973242		1.81019
	0.973242		1.81019
	0.973242		1.81019
	0.973242		1.78885
	0.96		1.78885
	0.96		1.78885
	0.96		1.78885
	0.96		1.78885
	0.96		1.78885
	0.96		1.78885
	0.96		1.78885
	0.96		1.78885
	0.96		1.78885
	0.96		1.78885
	0.96		1.78885
	0.96		1.76726
	0.96		1.76726
	0.932952		1.76726
	0.932952		1.76726
	0.932952		1.76726
	0.932952		1.76726
	0.932952		1.76726
	0.932952		1.76726
	0.932952		1.76726
	0.932952		1.76726
	0.932952		1.76726
	0.932952		1.76
	0.932952		1.76
	0.932952		1.73066
	0.932952		1.73066
	0.932952		1.73066
	0.932952		1.73066
	0.932952		1.73066
	0.932952		1.73066
	0.932952		1.73066
	0.905097		1.73066
	0.905097		1.73066
	0.905097		1.73066
	0.905097		1.73066
	0.905097		1.73066
	0.905097		1.73066
	0.905097		1.73066
	0.905097		1.72325
	0.905097		1.72325
	0.905097		1.72325
	0.905097		1.72325
	0.905097		1.72325
	0.905097		1.72325
	0.861626		1.72325
	0.861626		1.72325
	0.861626		1.72325
	0.861626		1.72325
	0.861626		1.70082
	0.861626		1.70082
	0.861626		1.70082
	0.861626		1.70082
	0.861626		1.70082
	0.861626		1.70082
	0.861626		1.70082
	0.861626		1.70082
	0.861626		1.70082
	0.861626		1.70082
	0.861626		1.70082
	0.861626		1.67045
	0.861626		1.67045
	0.861626		1.67045
	0.815843		1.67045
	0.815843		1.67045
	0.815843		1.67045
	0.815843		1.67045
	0.815843		1.67045
	0.815843		1.6473
	0.815843		1.6473
	0.815843		1.6473
	0.815843		1.6473
	0.815843		1.6473
	0.815843		1.6473
	0.815843		1.6473
	0.815843		1.6473
	0.815843		1.6473
	0.815843		1.63169
	0.815843		1.63169
	0.815843		1.63169
	0.815843		1.63169
	0.815843		1.63169
	0.815843		1.63169
	0.815843		1.60798
	0.815843		1.60798
	0.815843		1.60798
	0.815843		1.60798
	0.8		1.60798
	0.8		1.60798
	0.8		1.60798
	0.8		1.60798
	0.8		1.60798
	0.8		1.60798
	0.8		1.60798
	0.8		1.60798
	0.8		1.6
	0.8		1.6
	0.8		1.6
	0.8		1.6
	0.8		1.6
	0.8		1.6
	0.8		1.6
	0.8		1.6
	0.8		1.6
	0.8		1.6
	0.8		1.6
	0.8		1.6
	0.8		1.6
	0.8		1.6
	0.8		1.6
	0.8		1.6
	0.8		1.6
	0.8		1.6
	0.8		1.6
	0.8		1.6
	0.8		1.58392
	0.8		1.58392
	0.8		1.58392
	0.8		1.58392
	0.8		1.58392
	0.8		1.57582
	0.8		1.57582
	0.8		1.57582
	0.8		1.57582
	0.8		1.57582
	0.8		1.57582
	0.8		1.57582
	0.8		1.57582
	0.8		1.57582
	0.8		1.51789
	0.8		1.51789
	0.8		1.51789
	0.8		1.51789
	0.8		1.51789
	0.8		1.51789
	0.715542		1.51789
	0.715542		1.51789
	0.715542		1.51789
	0.715542		1.51789
	0.715542		1.51789
	0.715542		1.51789
	0.715542		1.51789
	0.715542		1.51789
	0.715542		1.51789
	0.715542		1.51789
	0.715542		1.51789
	0.715542		1.51789
	0.715542		1.51789
	0.715542		1.50944
	0.715542		1.50944
	0.715542		1.50944
	0.715542		1.50944
	0.715542		1.50944
	0.715542		1.50944
	0.715542		1.50944
	0.715542		1.50944
	0.715542		1.50944
	0.715542		1.50944
	0.715542		1.50944
	0.678823		1.50944
	0.678823		1.47513
	0.678823		1.47513
	0.678823		1.47513
	0.678823		1.47513
	0.678823		1.47513
	0.678823		1.47513
	0.678823		1.47513
	0.678823		1.47513
	0.678823		1.47513
	0.678823		1.47513
	0.678823		1.47513
	0.678823		1.47513
	0.659697		1.47513
	0.659697		1.47513
	0.659697		1.47513
	0.659697		1.47513
	0.659697		1.47513
	0.659697		1.47513
	0.659697		1.47513
	0.659697		1.47513
	0.659697		1.47513
	0.659697		1.47513
	0.659697		1.47513
	0.659697		1.47513
	0.659697		1.47513
	0.659697		1.47513
	0.659697		1.47513
	0.659697		1.44886
	0.659697		1.44886
	0.659697		1.44886
	0.659697		1.44886
	0.659697		1.44886
	0.659697		1.44886
	0.659697		1.44886
	0.659697		1.44886
	0.659697		1.44886
	0.659697		1.44886
	0.659697		1.44886
	0.659697		1.44886
	0.64		1.44886
	0.64		1.44886
	0.64		1.44886
	0.64		1.44886
	0.64		1.44886
	0.64		1.44886
	0.64		1.44886
	0.64		1.44886
	0.64		1.44
	0.64		1.44
	0.64		1.44
	0.64		1.44
	0.64		1.44
	0.576888		1.44
	0.576888		1.44
	0.576888		1.44
	0.576888		1.44
	0.576888		1.44
	0.576888		1.44
	0.576888		1.44
	0.576888		1.44
	0.576888		1.44
	0.576888		1.43108
	0.576888		1.43108
	0.576888		1.43108
	0.576888		1.43108
	0.576888		1.43108
	0.576888		1.43108
	0.576888		1.43108
	0.576888		1.43108
	0.576888		1.43108
	0.576888		1.43108
	0.576888		1.37637
	0.576888		1.37637
	0.576888		1.37637
	0.576888		1.37637
	0.576888		1.37637
	0.576888		1.37637
	0.576888		1.37637
	0.576888		1.37637
	0.576888		1.37637
	0.576888		1.37637
	0.576888		1.37637
	0.576888		1.37637
	0.576888		1.37637
	0.576888		1.37637
	0.576888		1.37637
	0.576888		1.37637
	0.576888		1.37637
	0.576888		1.37637
	0.576888		1.37637
	0.576888		1.37637
	0.576888		1.37637
	0.576888		1.37637
	0.576888		1.37637
	0.576888		1.36704
	0.576888		1.36704
	0.576888		1.36704
	0.576888		1.36704
	0.576888		1.36704
	0.576888		1.36704
	0.576888		1.36704
	0.505964		1.36704
	0.505964		1.36704
	0.505964		1.36704
	0.505964		1.36704
	0.505964		1.36704
	0.505964		1.36704
	0.505964		1.36704
	0.505964		1.36704
	0.505964		1.36704
	0.505964		1.36704
	0.505964		1.36704
	0.505964		1.35765
	0.505964		1.35765
	0.505964		1.35765
	0.505964		1.35765
	0.505964		1.35765
	0.505964		1.31939
	0.505964		1.31939
	0.505964		1.31939
	0.505964		1.31939
	0.505964		1.31939
	0.505964		1.31939
	0.505964		1.31939
	0.505964		1.31939
	0.505964		1.31939
	0.505964		1.31939
	0.505964		1.31939
	0.505964		1.31939
	0.505964		1.31939
	0.505964		1.31939
	0.505964		1.31939
	0.505964		1.31939
	0.505964		1.31939
	0.505964		1.31939
	0.505964		1.31939
	0.505964		1.31939
	0.505964		1.31939
	0.505964		1.31939
	0.505964		1.31939
	0.505964		1.31939
	0.505964		1.31939
	0.505964		1.31939
	0.505964		1.31939
	0.505964		1.31939
	0.505964		1.31939
	0.505964		1.31939
	0.505964		1.31939
	0.505964		1.31939
	0.505964		1.28996
	0.505964		1.28996
	0.505964		1.28996
	0.505964		1.28996
	0.505964		1.28996
	0.505964		1.28996
	0.48		1.28996
	0.48		1.28996
	0.48		1.28996
	0.48		1.28996
	0.48		1.28996
	0.48		1.28996
	0.48		1.28996
	0.48		1.28996
	0.48		1.28996
	0.48		1.28996
	0.48		1.28996
	0.48		1.28996
	0.48		1.28996
	0.48		1.28996
	0.48		1.28996
	0.48		1.28996
	0.48		1.28996
	0.48		1.28996
	0.48		1.28996
	0.48		1.28996
	0.48		1.28996
	0.48		1.28996
	0.48		1.28996
	0.48		1.28996
	0.48		1.28996
	0.48		1.28996
	0.48		1.28996
	0.48		1.28996
	0.48		1.28996
	0.48		1.28996
	0.48		1.28996
	0.48		1.28996
	0.48		1.28996
	0.452548		1.28996
	0.452548		1.28996
	0.452548		1.28996
	0.452548		1.28996
	0.452548		1.28996
	0.452548		1.28996
	0.452548		1.28996
	0.452548		1.28996
	0.452548		1.28996
	0.452548		1.28996
	0.452548		1.28996
	0.452548		1.28996
	0.452548		1.28996
	0.452548		1.28996
	0.452548		1.28
	0.452548		1.28
	0.452548		1.28
	0.452548		1.28
	0.452548		1.28
	0.452548		1.28
	0.452548		1.28
	0.452548		1.28
	0.452548		1.28
	0.452548		1.28
	0.452548		1.24964
	0.357771		1.24964
	0.357771		1.24964
	0.357771		1.24964
	0.357771		1.24964
	0.357771		1.24964
	0.357771		1.24964
	0.357771		1.24964
	0.357771		1.24964
	0.357771		1.24964
	0.357771		1.24964
	0.357771		1.24964
	0.357771		1.24964
	0.357771		1.24964
	0.357771		1.24964
	0.357771		1.24964
	0.357771		1.24964
	0.357771		1.24964
	0.357771		1.24964
	0.357771		1.21852
	0.357771		1.21852
	0.357771		1.21852
	0.357771		1.21852
	0.357771		1.21852
	0.357771		1.21852
	0.357771		1.21852
	0.357771		1.21852
	0.357771		1.21852
	0.357771		1.21852
	0.357771		1.21852
	0.357771		1.21852
	0.357771		1.21852
	0.357771		1.21852
	0.357771		1.21852
	0.357771		1.21852
	0.357771		1.21852
	0.357771		1.21852
	0.357771		1.21852
	0.357771		1.21852
	0.357771		1.21852
	0.357771		1.21852
	0.357771		1.21852
	0.357771		1.21852
	0.357771		1.21852
	0.357771		1.21852
	0.357771		1.21852
	0.357771		1.21852
	0.357771		1.21852
	0.357771		1.16482
	0.357771		1.16482
	0.357771		1.16482
	0.357771		1.16482
	0.357771		1.16482
	0.357771		1.16482
	0.357771		1.16482
	0.357771		1.16482
	0.357771		1.16482
	0.357771		1.16482
	0.357771		1.16482
	0.357771		1.16482
	0.357771		1.16482
	0.357771		1.16482
	0.357771		1.16482
	0.357771		1.16482
	0.357771		1.16482
	0.357771		1.16482
	0.357771		1.16482
	0.357771		1.16482
	0.357771		1.16482
	0.357771		1.16482
	0.357771		1.16482
	0.357771		1.16482
	0.357771		1.16482
	0.357771		1.16482
	0.32		1.15378
	0.32		1.15378
	0.32		1.15378
	0.32		1.15378
	0.32		1.15378
	0.32		1.15378
	0.32		1.15378
	0.32		1.15378
	0.32		1.15378
	0.32		1.15378
	0.32		1.15378
	0.32		1.15378
	0.32		1.15378
	0.32		1.15378
	0.32		1.15378
	0.32		1.15378
	0.32		1.15378
	0.32		1.15378
	0.32		1.15378
	0.32		1.15378
	0.32		1.15378
	0.32		1.15378
	0.32		1.15378
	0.32		1.15378
	0.32		1.15378
	0.32		1.15378
	0.32		1.15378
	0.32		1.15378
	0.32		1.15378
	0.32		1.15378
	0.32		1.15378
	0.32		1.15378
	0.32		1.15378
	0.32		1.15378
	0.32		1.15378
	0.32		1.15378
	0.32		1.15378
	0.32		1.15378
	0.32		1.15378
	0.32		1.15378
	0.32		1.15378
	0.32		1.15378
	0.32		1.13137
	0.32		1.13137
	0.32		1.13137
	0.32		1.13137
	0.32		1.13137
	0.32		1.13137
	0.32		1.13137
	0.32		1.13137
	0.32		1.13137
	0.226274		1.13137
	0.226274		1.13137
	0.226274		1.13137
	0.226274		1.13137
	0.226274		1.13137
	0.226274		1.13137
	0.226274		1.13137
	0.226274		1.13137
	0.226274		1.13137
	0.226274		1.13137
	0.226274		1.13137
	0.226274		1.13137
	0.226274		1.13137
	0.226274		1.13137
	0.226274		1.13137
	0.226274		1.13137
	0.226274		1.13137
	0.226274		1.13137
	0.226274		1.13137
	0.226274		1.13137
	0.226274		1.13137
	0.226274		1.13137
	0.226274		1.13137
	0.226274		1.13137
	0.226274		1.13137
	0.226274		1.13137
	0.226274		1.13137
	0.226274		1.13137
	0.226274		1.12
	0.226274		1.12
	0.226274		1.12
	0.226274		1.12
	0.226274		1.12
	0.226274		1.12
	0.226274		1.12
	0.226274		1.12
	0.226274		1.12
	0.226274		1.12
	0.226274		1.12
	0.226274		1.12
	0.226274		1.12
	0.226274		1.12
	0.226274		1.12
	0.226274		1.07331
	0.226274		1.07331
	0.226274		1.07331
	0.16		1.07331
	0.16		1.07331
	0.16		1.07331
	0.16		1.07331
	0.16		1.07331
	0.16		1.07331
	0.16		1.07331
	0.16		1.07331
	0.16		1.07331
	0.16		1.07331
	0.16		1.07331
	0.16		1.07331
	0.16		1.07331
	0.16		1.07331
	0.16		1.07331
	0.16		1.07331
	0.16		1.07331
	0.16		1.07331
	0.16		1.07331
	0.16		1.07331
	0.16		1.07331
	0.16		1.07331
	0.16		1.07331
	0.16		1.07331
	0.16		1.07331
	0.16		1.07331
	0.16		1.07331
	0.16		1.07331
	0.16		1.07331
	0.16		1.07331
	0.16		1.07331
	0.16		1.07331
	0.16		1.0245
	0.16		1.0245
	0.16		1.0245
	0.16		1.0245
	0.16		1.0245
	0.16		1.0245
	0.16		1.0245
	0.16		1.0245
	0.16		1.0245
	0.16		1.0245
	0.16		1.0245
	0.16		1.0245
	0.16		1.0245
	0.16		1.0245
	0.16		1.0245
	0.16		1.0245
	0.16		1.0245
	0.16		1.0245
	0.16		1.0245
	0.16		1.0245
	0.16		1.0245
	0.16		1.0245
	0.16		1.0245
	0.16		1.0245
	0.16		1.0245
	0.16		1.0245
	0.16		1.0245
	0		1.0245
	0		1.0245
			1.0245
			1.0245
			1.0245
			1.0245
			1.01193
			1.01193
			1.01193
			1.01193
			1.01193
			1.01193
			1.01193
			1.01193
			1.01193
			1.01193
			1.01193
			1.01193
			1.01193
			1.01193
			1.01193
			1.01193
			1.01193
			1.01193
			1.01193
			1.01193
			1.01193
			1.01193
			1.01193
			1.01193
			1.01193
			1.01193
			1.01193
			1.01193
			1.01193
			1.01193
			0.973242
			0.973242
			0.973242
			0.973242
			0.973242
			0.973242
			0.973242
			0.973242
			0.973242
			0.973242
			0.973242
			0.973242
			0.973242
			0.973242
			0.973242
			0.973242
			0.973242
			0.973242
			0.973242
			0.973242
			0.973242
			0.973242
			0.973242
			0.973242
			0.973242
			0.973242
			0.973242
			0.973242
			0.973242
			0.973242
			0.973242
			0.973242
			0.973242
			0.973242
			0.973242
			0.973242
			0.973242
			0.973242
			0.973242
			0.973242
			0.973242
			0.973242
			0.973242
			0.973242
			0.973242
			0.973242
			0.973242
			0.973242
			0.96
			0.96
			0.96
			0.96
			0.96
			0.96
			0.96
			0.96
			0.96
			0.96
			0.96
			0.96
			0.96
			0.96
			0.96
			0.96
			0.96
			0.96
			0.96
			0.96
			0.96
			0.96
			0.96
			0.96
			0.96
			0.96
			0.96
			0.96
			0.96
			0.96
			0.96
			0.96
			0.96
			0.932952
			0.932952
			0.932952
			0.932952
			0.932952
			0.932952
			0.932952
			0.932952
			0.932952
			0.932952
			0.932952
			0.932952
			0.932952
			0.932952
			0.932952
			0.932952
			0.932952
			0.932952
			0.932952
			0.932952
			0.932952
			0.932952
			0.932952
			0.932952
			0.932952
			0.932952
			0.932952
			0.932952
			0.932952
			0.932952
			0.932952
			0.932952
			0.932952
			0.932952
			0.932952
			0.932952
			0.932952
			0.905097
			0.905097
			0.905097
			0.905097
			0.905097
			0.905097
			0.905097
			0.905097
			0.905097
			0.905097
			0.905097
			0.905097
			0.905097
			0.905097
			0.905097
			0.905097
			0.905097
			0.905097
			0.905097
			0.905097
			0.905097
			0.905097
			0.905097
			0.905097
			0.905097
			0.905097
			0.905097
			0.905097
			0.905097
			0.905097
			0.905097
			0.905097
			0.905097
			0.905097
			0.905097
			0.905097
			0.905097
			0.905097
			0.905097
			0.861626
			0.861626
			0.861626
			0.861626
			0.861626
			0.861626
			0.861626
			0.861626
			0.861626
			0.861626
			0.861626
			0.861626
			0.861626
			0.861626
			0.861626
			0.861626
			0.861626
			0.861626
			0.861626
			0.861626
			0.861626
			0.861626
			0.861626
			0.861626
			0.861626
			0.861626
			0.861626
			0.861626
			0.861626
			0.861626
			0.861626
			0.861626
			0.861626
			0.861626
			0.861626
			0.861626
			0.861626
			0.861626
			0.861626
			0.861626
			0.861626
			0.861626
			0.861626
			0.861626
			0.861626
			0.861626
			0.861626
			0.861626
			0.861626
			0.861626
			0.861626
			0.861626
			0.861626
			0.861626
			0.815843
			0.815843
			0.815843
			0.815843
			0.815843
			0.815843
			0.815843
			0.815843
			0.815843
			0.815843
			0.815843
			0.815843
			0.815843
			0.815843
			0.815843
			0.815843
			0.815843
			0.815843
			0.815843
			0.815843
			0.815843
			0.815843
			0.815843
			0.815843
			0.815843
			0.815843
			0.815843
			0.815843
			0.815843
			0.815843
			0.815843
			0.815843
			0.815843
			0.815843
			0.815843
			0.815843
			0.815843
			0.815843
			0.815843
			0.815843
			0.815843
			0.815843
			0.815843
			0.815843
			0.815843
			0.815843
			0.815843
			0.815843
			0.815843
			0.815843
			0.815843
			0.8
			0.8
			0.8
			0.8
			0.8
			0.8
			0.8
			0.8
			0.8
			0.8
			0.8
			0.8
			0.8
			0.8
			0.8
			0.8
			0.8
			0.8
			0.8
			0.8
			0.8
			0.8
			0.8
			0.8
			0.8
			0.8
			0.8
			0.8
			0.8
			0.8
			0.8
			0.8
			0.8
			0.8
			0.8
			0.8
			0.8
			0.8
			0.8
			0.8
			0.8
			0.8
			0.8
			0.8
			0.8
			0.8
			0.8
			0.8
			0.8
			0.8
			0.8
			0.8
			0.8
			0.8
			0.8
			0.8
			0.8
			0.8
			0.8
			0.8
			0.8
			0.8
			0.8
			0.8
			0.8
			0.8
			0.8
			0.8
			0.8
			0.8
			0.8
			0.8
			0.8
			0.8
			0.8
			0.8
			0.8
			0.8
			0.8
			0.8
			0.8
			0.8
			0.8
			0.8
			0.8
			0.8
			0.8
			0.8
			0.8
			0.8
			0.8
			0.8
			0.8
			0.715542
			0.715542
			0.715542
			0.715542
			0.715542
			0.715542
			0.715542
			0.715542
			0.715542
			0.715542
			0.715542
			0.715542
			0.715542
			0.715542
			0.715542
			0.715542
			0.715542
			0.715542
			0.715542
			0.715542
			0.715542
			0.715542
			0.715542
			0.715542
			0.715542
			0.715542
			0.715542
			0.715542
			0.715542
			0.715542
			0.715542
			0.715542
			0.715542
			0.715542
			0.715542
			0.715542
			0.715542
			0.715542
			0.715542
			0.715542
			0.715542
			0.715542
			0.715542
			0.715542
			0.715542
			0.715542
			0.715542
			0.715542
			0.715542
			0.715542
			0.715542
			0.715542
			0.715542
			0.715542
			0.715542
			0.715542
			0.715542
			0.715542
			0.715542
			0.715542
			0.715542
			0.715542
			0.715542
			0.715542
			0.715542
			0.715542
			0.715542
			0.715542
			0.715542
			0.715542
			0.715542
			0.715542
			0.715542
			0.715542
			0.715542
			0.715542
			0.715542
			0.715542
			0.715542
			0.715542
			0.715542
			0.715542
			0.715542
			0.715542
			0.715542
			0.715542
			0.715542
			0.715542
			0.715542
			0.715542
			0.715542
			0.715542
			0.715542
			0.715542
			0.715542
			0.715542
			0.715542
			0.715542
			0.715542
			0.715542
			0.678823
			0.678823
			0.678823
			0.678823
			0.678823
			0.678823
			0.678823
			0.678823
			0.678823
			0.678823
			0.678823
			0.678823
			0.678823
			0.678823
			0.678823
			0.678823
			0.678823
			0.678823
			0.678823
			0.678823
			0.678823
			0.678823
			0.678823
			0.678823
			0.659697
			0.659697
			0.659697
			0.659697
			0.659697
			0.659697
			0.659697
			0.659697
			0.659697
			0.659697
			0.659697
			0.659697
			0.659697
			0.659697
			0.659697
			0.659697
			0.659697
			0.659697
			0.659697
			0.659697
			0.659697
			0.659697
			0.659697
			0.659697
			0.659697
			0.659697
			0.659697
			0.659697
			0.659697
			0.659697
			0.659697
			0.659697
			0.659697
			0.659697
			0.659697
			0.659697
			0.659697
			0.659697
			0.659697
			0.659697
			0.659697
			0.659697
			0.659697
			0.659697
			0.659697
			0.659697
			0.659697
			0.659697
			0.659697
			0.659697
			0.659697
			0.659697
			0.659697
			0.659697
			0.659697
			0.659697
			0.659697
			0.659697
			0.659697
			0.659697
			0.659697
			0.659697
			0.659697
			0.659697
			0.659697
			0.659697
			0.659697
			0.659697
			0.659697
			0.659697
			0.659697
			0.659697
			0.659697
			0.659697
			0.659697
			0.659697
			0.659697
			0.659697
			0.659697
			0.659697
			0.659697
			0.659697
			0.659697
			0.659697
			0.659697
			0.659697
			0.659697
			0.659697
			0.659697
			0.659697
			0.659697
			0.659697
			0.659697
			0.659697
			0.659697
			0.659697
			0.659697
			0.659697
			0.659697
			0.659697
			0.659697
			0.659697
			0.659697
			0.659697
			0.64
			0.64
			0.64
			0.64
			0.64
			0.64
			0.64
			0.64
			0.64
			0.64
			0.64
			0.64
			0.64
			0.64
			0.64
			0.64
			0.64
			0.64
			0.64
			0.64
			0.64
			0.64
			0.64
			0.64
			0.64
			0.64
			0.64
			0.64
			0.64
			0.64
			0.64
			0.64
			0.64
			0.64
			0.64
			0.64
			0.64
			0.64
			0.64
			0.64
			0.64
			0.64
			0.64
			0.64
			0.64
			0.64
			0.64
			0.64
			0.64
			0.64
			0.64
			0.64
			0.64
			0.64
			0.64
[truncated: 1,256 more rows]

## Sheet: Figure 3E
Ctrl Low	Ctrl High	Noc Low	Noc High	Taxol Low	Taxol High		Statistical significance calculated using one-way ANOVA of each condition compared to every other condition
0	33.3333	6.89655	31.5789	4.16667	4.16667		Number of families	1
0	2.38095	14.2857	70.5882	0	9.52381		Number of comparisons per family	15
18.1818	5	0	6.89655	3.0303	7.69231		Alpha	0.05
4.16667	21.2121	2.08333	13.0435	0	0
4.16667	18.1818	3.0303	20.9302	6.66667	0		Tukey's multiple comparisons test	Mean Diff.	95.00% CI of diff.	Significant?	Summary	Adjusted P Value
0	0	0	52.6316	0	4.34783		Ctrl Low vs. Ctrl High	-8.991	-18.89 to 0.9044	No	ns	0.0972	A-B
0	0	2.27273	2.77778	2.63158	2.85714		Ctrl Low vs. Noc Low	-1.368	-11.39 to 8.656	No	ns	0.9987	A-C
0	0	6.25	38.2353	6.97674	0		Ctrl Low vs. Noc High	-22.34	-32.36 to -12.32	Yes	****	<0.0001	A-D
0	3.57143	12.1212	41.0256	4.54545	15.1515		Ctrl Low vs. Taxol Low	0.1914	-10.13 to 10.52	No	ns	>0.9999	A-E
0	10	0	2.22222	0	8.57143		Ctrl Low vs. Taxol High	-1.56	-11.46 to 8.335	No	ns	0.9974	A-F
0	15	0	0	0	0		Ctrl High vs. Noc Low	7.623	-2.126 to 17.37	No	ns	0.2155	B-C
0	11.1111	8.57143	32.5581	3.0303	0		Ctrl High vs. Noc High	-13.35	-23.10 to -3.600	Yes	**	0.0018	B-D
4.7619	18.75	0	42.4242	0	0		Ctrl High vs. Taxol Low	9.182	-0.8749 to 19.24	No	ns	0.0943	B-E
2.27273	19.3548	0	30	2.7027	0		Ctrl High vs. Taxol High	7.431	-2.186 to 17.05	No	ns	0.2269	B-F
3.125	23.0769	0	35.2941	0	0		Noc Low vs. Noc High	-20.97	-30.85 to -11.09	Yes	****	<0.0001	C-D
0	3.57143	0	15.625	0	0		Noc Low vs. Taxol Low	1.559	-8.625 to 11.74	No	ns	0.9977	C-E
2.43902	0	10.5263	3.44828		0		Noc Low vs. Taxol High	-0.1925	-9.942 to 9.557	No	ns	>0.9999	C-F
	30	0	4.25532		0		Noc High vs. Taxol Low	22.53	12.35 to 32.72	Yes	****	<0.0001	D-E
	0				21.0526		Noc High vs. Taxol High	20.78	11.03 to 30.53	Yes	****	<0.0001	D-F
							Taxol Low vs. Taxol High	-1.752	-11.81 to 8.305	No	ns	0.9958	E-F
							Test details	Mean 1	Mean 2	Mean Diff.	SE of diff.	n1	n2	q	DF
							Ctrl Low vs. Ctrl High	2.301	11.29	-8.991	3.406	17	19	3.733	101
							Ctrl Low vs. Noc Low	2.301	3.669	-1.368	3.451	17	18	0.5607	101
							Ctrl Low vs. Noc High	2.301	24.64	-22.34	3.451	17	18	9.156	101
							Ctrl Low vs. Taxol Low	2.301	2.109	0.1914	3.554	17	16	0.07617	101
							Ctrl Low vs. Taxol High	2.301	3.861	-1.56	3.406	17	19	0.6479	101
							Ctrl High vs. Noc Low	11.29	3.669	7.623	3.356	19	18	3.212	101
							Ctrl High vs. Noc High	11.29	24.64	-13.35	3.356	19	18	5.626	101
							Ctrl High vs. Taxol Low	11.29	2.109	9.182	3.462	19	16	3.751	101
							Ctrl High vs. Taxol High	11.29	3.861	7.431	3.31	19	19	3.175	101
							Noc Low vs. Noc High	3.669	24.64	-20.97	3.401	18	18	8.721	101
							Noc Low vs. Taxol Low	3.669	2.109	1.559	3.506	18	16	0.6291	101
							Noc Low vs. Taxol High	3.669	3.861	-0.1925	3.356	18	19	0.08111	101
							Noc High vs. Taxol Low	24.64	2.109	22.53	3.506	18	16	9.09	101
							Noc High vs. Taxol High	24.64	3.861	20.78	3.356	18	19	8.757	101
							Taxol Low vs. Taxol High	2.109	3.861	-1.752	3.462	16	19	0.7156	101

## Sheet: Figure 3F
Ctrl Low	Ctrl High	Noc Low	Noc High	Taxol Low	Taxol High		Statistical significance calculated using Kruskal-Wallis test of each condition compared to every other condition
0	52.6316	28.5714	37.5	20	14.2857		Number of families	1
0	5.55556	14.2857	70.5882	0	33.3333		Number of comparisons per family	15
32	0	0	25	20	20		Alpha	0.05
16.6667	30.4348	9.09091	25	0	0
16.6667	30	7.14286	25.7143	25	0		Dunn's multiple comparisons test	Mean rank diff.	Significant?	Summary	Adjusted P Value
0	0	0	57.1429	0	8.33333		Ctrl Low vs. Ctrl High	-16.93	No	ns	>0.9999	A-B
0	0	20	4.7619	12.5	10		Ctrl Low vs. Noc Low	-5.34	No	ns	>0.9999	A-C
0	0	12.5	48.1482	25	0		Ctrl Low vs. Noc High	-37.98	Yes	**	0.0024	A-D
0	6.25	44.4444	53.3333	18.1818	25		Ctrl Low vs. Taxol Low	-8.93	No	ns	>0.9999	A-E
0	0	0	5	0	21.4286		Ctrl Low vs. Taxol High	-2.749	No	ns	>0.9999	A-F
0	22.2222	0	0	0	0		Ctrl High vs. Noc Low	11.59	No	ns	>0.9999	B-C
0	19.0476	16.6667	56	33.3333	0		Ctrl High vs. Noc High	-22.34	No	**	0.007	B-D
11.7647	50	0	63.6364	0	0		Ctrl High vs. Taxol Low	8.003	No	ns	>0.9999	B-E
20	35.2941	0	41.3793	100	0		Ctrl High vs. Taxol High	14.18	No	ns	>0.9999	B-F
16.6667	42.8571	0	37.5	0	0		Noc Low vs. Noc High	-32.64	Yes	*	0.0151	C-D
0	11.1111	0	29.4118	0	0		Noc Low vs. Taxol Low	-3.59	No	ns	>0.9999	C-E
16.6667	0	40	6.25		0		Noc Low vs. Taxol High	2.591	No	ns	>0.9999	C-F
	44.4444	0	6.45161		0		Noc High vs. Taxol Low	29.05	No	ns	0.0677	D-E
	0				57.1429		Noc High vs. Taxol High	35.23	Yes	**	0.0048	D-F
							Taxol Low vs. Taxol High	6.181	No	ns	>0.9999	E-F
							Test details	Mean rank 1	Mean rank 2	Mean rank diff.	n1	n2	Z
							Ctrl Low vs. Ctrl High	41.88	58.82	-16.93	17	19	1.704
							Ctrl Low vs. Noc Low	41.88	47.22	-5.34	17	18	0.5304
							Ctrl Low vs. Noc High	41.88	79.86	-37.98	17	18	3.772
							Ctrl Low vs. Taxol Low	41.88	50.81	-8.93	17	16	0.8612
							Ctrl Low vs. Taxol High	41.88	44.63	-2.749	17	19	0.2766
							Ctrl High vs. Noc Low	58.82	47.22	11.59	19	18	1.184
							Ctrl High vs. Noc High	58.82	79.86	-21.05	19	18	2.149
							Ctrl High vs. Taxol Low	58.82	50.81	8.003	19	16	0.7923
							Ctrl High vs. Taxol High	58.82	44.63	14.18	19	19	1.469
							Noc Low vs. Noc High	47.22	79.86	-32.64	18	18	3.289
							Noc Low vs. Taxol Low	47.22	50.81	-3.59	18	16	0.351
							Noc Low vs. Taxol High	47.22	44.63	2.591	18	19	0.2646
							Noc High vs. Taxol Low	79.86	50.81	29.05	18	16	2.84
							Noc High vs. Taxol High	79.86	44.63	35.23	18	19	3.598
							Taxol Low vs. Taxol High	50.81	44.63	6.181	16	19	0.6119

## Sheet: Figure 3G
Glu-tub int norm per isl	# clusters
0.853858	1
1.61513	0
0.915582	1
0.750983	0
1.09047	0
1.41967	0
0.915582	0
0.699546	0
1.33737	0
0.915582	1
0.565809	0
0.534947	0
0.504085	2
0.617247	0
1.44024	0
0.617247	1
0.627534	0
0.545234	0
0.617247	0
0.576097	0
0.596672	0
0.720121	0
1.92375	0
3.78578	0
0.822995	0
0.822995	0
0.88472	0
0.822995	0
1.21392	0
1.68714	0
0.730408	1
0.987595	1
0.555522	0
1.28593	0
0.908793	1
1.12474	0
1.00777	0
0.782822	0
0.953783	0
0.764826	0
0.890798	0
1.38569	0
0.647853	0
1.82658	0
0.566871	0
1.07975	0
0.620859	0
1.07975	0
0.152965	0
2.68139	0
0.368916	0
0.917791	0
1.12474	0
0.782822	0
0.863804	0
1.46667	0
1.13519	0
1.03858	0
1.31634	1
0.821201	0
1.72694	0
0.881583	3
1.84166	0
0.990272	2
0.923851	2
0.386448	1
0.941966	2
1.03254	0
0.676283	2
0.984233	0
0.845354	0
0.821201	4
0.875545	1
0.760819	1
0.430646	0
0.133148	0
0.468483	1
1.02887	0
1.06982	0
0.337665	0
0.368658	0
0.0489451	0
0.0604481	0
3.26852	0
2.65978	0
2.70708	0
0.417936	0
1.99134	0
0.277056	0
1.93939	0
0.450216	0
0.30303	0
0.917749	0
2.5974	0
1.2381	0
0.822511	0
0.406926	0
0.623377	0
0.4329	0

## Sheet: Figure 3H
# clusters gt<1	# clusters gt>1
1	0
1	0
0	0			Mann-Whittney non-parametric comparison test
0	0
0	0			Table Analyzed
1	0
0	0			Column B	Data Set-B
0	0			vs.	vs.
2	0			Column A	Data Set-A
0	0
1	0			Mann Whitney test
0	0			P value	0.003
0	0			Exact or approximate P value?	Exact
0	0			P value summary	**
0	0			Significantly different (P < 0.05)?	Yes
0	0			One- or two-tailed P value?	Two-tailed
0	0			Sum of ranks in column A,B	3527 , 1423
0	0			Mann-Whitney U	828
0	0
0	0			Difference between medians
0	0			Median of column A	0.000, n=65
1	1			Median of column B	0.000, n=34
1	0			Difference: Actual	0
0	0			Difference: Hodges-Lehmann	0
1	0
0	0
0	0
0	0
0	0
0	0
0	0
0	0
0	0
0	0
0
0
0
0
3
2
2
1
2
2
0
0
4
1
1
0
0
1
0
0
0
0
0
0
0
0
0
0
0
0
0

## Sheet: Figure 3I
Glu-tub int norm per isl	Clustered events
0.853858	6
1.61513	0
0.915582	4
0.750983	0
1.09047	0
1.41967	0
0.915582	0
0.699546	0
1.33737	0
0.915582	3
0.565809	0
0.534947	0
0.504085	13
0.617247	0
1.44024	0
0.617247	4
0.627534	0
0.545234	0
0.617247	0
0.576097	0
0.596672	0
0.720121	0
1.92375	0
3.78578	0
0.822995	0
0.822995	0
0.88472	0
0.822995	0
1.21392	0
1.68714	0
0.730408	4
0.987595	7
0.555522	0
1.28593	0
0.908793	10
1.12474	0
1.00777	0
0.782822	0
0.953783	0
0.764826	0
0.890798	0
1.38569	0
0.647853	0
1.82658	0
0.566871	0
1.07975	0
0.620859	0
1.07975	0
0.152965	0
2.68139	0
0.368916	0
0.917791	0
1.12474	0
0.782822	0
0.863804	0
1.46667	0
1.13519	0
1.03858	0
1.31634	3
0.821201	0
1.72694	0
0.881583	39
1.84166	1
0.990272	15
0.923851	13
0.386448	4
0.941966	9
1.03254	0
0.676283	14
0.984233	0
0.845354	0
0.821201	23
0.875545	7
0.760819	6
0.430646	0
0.133148	0
0.468483	3
1.02887	0
1.06982	0
0.337665	0
0.368658	0
0.0489451	0
0.0604481	0
3.26852	0
2.65978	0
2.70708	0
0.417936	0
1.99134	0
0.277056	0
1.93939	0
0.450216	0
0.30303	0
0.917749	0
2.5974	0
1.2381	0
0.822511	0
0.406926	0
0.623377	0
0.4329	0

## Sheet: Figure 3J
# clustered events gt<1	# clustered events gt>1
6	0
4	0				Mann-Whittney non-parametric comparison test p-value is shown
0	0
0	0				Table Analyzed
0	0
3	0				Column B	Data Set-B
0	0				vs.	vs.
0	0				Column A	Data Set-A
13	0
0	0				Mann Whitney test
4	0				P value	0.0055
0	0				Exact or approximate P value?	Exact
0	0				P value summary	**
0	0				Significantly different (P < 0.05)?	Yes
0	0				One- or two-tailed P value?	Two-tailed
0	0				Sum of ranks in column A,B	3508 , 1442
0	0				Mann-Whitney U	847
0	0
0	0				Difference between medians
0	0				Median of column A	0.000, n=65
0	0				Median of column B	0.000, n=34
4	3				Difference: Actual	0
7	0				Difference: Hodges-Lehmann	0
0	1
10	0
0	0
0	0
0	0
0	0
0	0
0	0
0	0
0	0
0	0
0
0
0
0
39
15
13
4
9
14
0
0
23
7
6
0
0
3
0
0
0
0
0
0
0
0
0
0
0
0
0
