# Supplementary material for: Microtubules regulate pancreatic β-cell heterogeneity via spatiotemporal control of insulin secretion hot spots
Source: eLife. 2021 Nov 16;10:e59912. doi: 10.7554/eLife.59912 (PMC8635970; doi:10.7554/eLife.59912)
Supplement: Figure 4—source data 1. — Each data set is a separate sheet. [file elife-59912-fig4-data1.xlsx]

## Sheet: Figure 4C and Cprime
Ctrl Low	Ctrl High	Noc Low	Noc High	Taxol Low	Taxol High		Cluster #	Ctrl Low	Ctrl High	Noc Low	Noc High	Taxol Low	Taxol High			Statistical significance calculated using Kruskal-Wallis test of each condition compared to every other condition
2	7	2	7	2	6		0	97.4138	89.6389	96.9697	76.634	97.3737	96.8531			Number of families	1
2	6	2	6	2	5		1	2.06897	7.53532	2.71132	13.0719	2.22222	2.7972			Number of comparisons per family	15
2	4	1	6	1	1		2	0.517241	1.25589	0.318979	5.39216	0.40404	0			Alpha	0.05
1	3	1	6	1	1		3	0	1.0989	0	1.79739	0	0
1	3	1	6	1	1		>3	0	0.470958	0	3.10458	0	0.34965			Dunn's multiple comparisons test	Mean rank diff.	Significant?	Summary	Adjusted P Value
1	3	1	5	1	1											Ctrl Low vs. Ctrl High	-136.8	Yes	****	<0.0001	A-B
1	3	1	5	1	1											Ctrl Low vs. Noc Low	-7.393	No	ns	>0.9999	A-C
1	3	1	5	1	1											Ctrl Low vs. Noc High	-370.3	Yes	****	<0.0001	A-D
1	3	1	5	1	1											Ctrl Low vs. Taxol Low	-0.5562	No	ns	>0.9999	A-E
1	3	1	5	1	1											Ctrl Low vs. Taxol High	-9.632	No	ns	>0.9999	A-F
1	2	1	4	1	1											Ctrl High vs. Noc Low	129.4	Yes	****	<0.0001	B-C
1	2	1	4	1	1											Ctrl High vs. Noc High	-233.5	Yes	****	<0.0001	B-D
1	2	1	4	1	1											Ctrl High vs. Taxol Low	136.2	Yes	****	<0.0001	B-E
1	2	1	4	0	1											Ctrl High vs. Taxol High	127.1	Yes	****	<0.0001	B-F
1	2	1	4	0	1											Noc Low vs. Noc High	-362.9	Yes	****	<0.0001	C-D
0	2	1	4	0	1											Noc Low vs. Taxol Low	6.837	No	ns	>0.9999	C-E
0	2	1	4	0	1											Noc Low vs. Taxol High	-2.239	No	ns	>0.9999	C-F
0	2	1	4	0	1											Noc High vs. Taxol Low	369.7	Yes	****	<0.0001	D-E
0	1	1	4	0	0											Noc High vs. Taxol High	360.6	Yes	****	<0.0001	D-F
0	1	0	3	0	0											Taxol Low vs. Taxol High	-9.076	No	ns	>0.9999	E-F
0	1	0	3	0	0
0	1	0	3	0	0											Test details	Mean rank 1	Mean rank 2	Mean rank diff.	n1	n2	Z
0	1	0	3	0	0											Ctrl Low vs. Ctrl High	1670	1807	-136.8	580	637	5.047
0	1	0	3	0	0											Ctrl Low vs. Noc Low	1670	1677	-7.393	580	627	0.2718
0	1	0	3	0	0											Ctrl Low vs. Noc High	1670	2040	-370.3	580	612	13.53
0	1	0	3	0	0											Ctrl Low vs. Taxol Low	1670	1671	-0.5562	580	495	0.01925
0	1	0	3	0	0											Ctrl Low vs. Taxol High	1670	1680	-9.632	580	572	0.3462
0	1	0	3	0	0											Ctrl High vs. Noc Low	1807	1677	129.4	637	627	4.87
0	1	0	3	0	0											Ctrl High vs. Noc High	1807	2040	-233.5	637	612	8.736
0	1	0	3	0	0											Ctrl High vs. Taxol Low	1807	1671	136.2	637	495	4.815
0	1	0	2	0	0											Ctrl High vs. Taxol High	1807	1680	127.1	637	572	4.674
0	1	0	2	0	0											Noc Low vs. Noc High	1677	2040	-362.9	627	612	13.52
0	1	0	2	0	0											Noc Low vs. Taxol Low	1677	1671	6.837	627	495	0.2408
0	1	0	2	0	0											Noc Low vs. Taxol High	1677	1680	-2.239	627	572	0.08201
0	1	0	2	0	0											Noc High vs. Taxol Low	2040	1671	369.7	612	495	12.95
0	1	0	2	0	0											Noc High vs. Taxol High	2040	1680	360.6	612	572	13.13
0	1	0	2	0	0											Taxol Low vs. Taxol High	1671	1680	-9.076	495	572	0.3131
0	1	0	2	0	0
0	1	0	2	0	0
0	1	0	2	0	0
0	1	0	2	0	0
0	1	0	2	0	0
0	1	0	2	0	0
0	1	0	2	0	0
0	1	0	2	0	0
0	1	0	2	0	0
0	1	0	2	0	0
0	1	0	2	0	0
0	1	0	2	0	0
0	1	0	2	0	0
0	1	0	2	0	0
0	1	0	2	0	0
0	1	0	2	0	0
0	1	0	2	0	0
0	1	0	2	0	0
0	1	0	2	0	0
0	1	0	2	0	0
0	1	0	2	0	0
0	1	0	2	0	0
0	1	0	2	0	0
0	1	0	2	0	0
0	1	0	2	0	0
0	1	0	2	0	0
0	1	0	1	0	0
0	1	0	1	0	0
0	1	0	1	0	0
0	0	0	1	0	0
0	0	0	1	0	0
0	0	0	1	0	0
0	0	0	1	0	0
0	0	0	1	0	0
0	0	0	1	0	0
0	0	0	1	0	0
0	0	0	1	0	0
0	0	0	1	0	0
0	0	0	1	0	0
0	0	0	1	0	0
0	0	0	1	0	0
0	0	0	1	0	0
0	0	0	1	0	0
0	0	0	1	0	0
0	0	0	1	0	0
0	0	0	1	0	0
0	0	0	1	0	0
0	0	0	1	0	0
0	0	0	1	0	0
0	0	0	1	0	0
0	0	0	1	0	0
0	0	0	1	0	0
0	0	0	1	0	0
0	0	0	1	0	0
0	0	0	1	0	0
0	0	0	1	0	0
0	0	0	1	0	0
0	0	0	1	0	0
0	0	0	1	0	0
0	0	0	1	0	0
0	0	0	1	0	0
0	0	0	1	0	0
0	0	0	1	0	0
0	0	0	1	0	0
0	0	0	1	0	0
0	0	0	1	0	0
0	0	0	1	0	0
0	0	0	1	0	0
0	0	0	1	0	0
0	0	0	1	0	0
0	0	0	1	0	0
0	0	0	1	0	0
0	0	0	1	0	0
0	0	0	1	0	0
0	0	0	1	0	0
0	0	0	1	0	0
0	0	0	1	0	0
0	0	0	1	0	0
0	0	0	1	0	0
0	0	0	1	0	0
0	0	0	1	0	0
0	0	0	1	0	0
0	0	0	1	0	0
0	0	0	1	0	0
0	0	0	1	0	0
0	0	0	1	0	0
0	0	0	1	0	0
0	0	0	1	0	0
0	0	0	1	0	0
0	0	0	1	0	0
0	0	0	1	0	0
0	0	0	1	0	0
0	0	0	1	0	0
0	0	0	1	0	0
0	0	0	1	0	0
0	0	0	1	0	0
0	0	0	1	0	0
0	0	0	1	0	0
0	0	0	1	0	0
0	0	0	1	0	0
0	0	0	1	0	0
0	0	0	1	0	0
0	0	0	1	0	0
0	0	0	1	0	0
0	0	0	1	0	0
0	0	0	1	0	0
0	0	0	0	0	0
0	0	0	0	0	0
0	0	0	0	0	0
0	0	0	0	0	0
0	0	0	0	0	0
0	0	0	0	0	0
0	0	0	0	0	0
0	0	0	0	0	0
0	0	0	0	0	0
0	0	0	0	0	0
0	0	0	0	0	0
0	0	0	0	0	0
0	0	0	0	0	0
0	0	0	0	0	0
0	0	0	0	0	0
0	0	0	0	0	0
0	0	0	0	0	0
0	0	0	0	0	0
0	0	0	0	0	0
0	0	0	0	0	0
0	0	0	0	0	0
0	0	0	0	0	0
0	0	0	0	0	0
0	0	0	0	0	0
0	0	0	0	0	0
0	0	0	0	0	0
0	0	0	0	0	0
0	0	0	0	0	0
0	0	0	0	0	0
0	0	0	0	0	0
0	0	0	0	0	0
0	0	0	0	0	0
0	0	0	0	0	0
0	0	0	0	0	0
0	0	0	0	0	0
0	0	0	0	0	0
0	0	0	0	0	0
0	0	0	0	0	0
0	0	0	0	0	0
0	0	0	0	0	0
0	0	0	0	0	0
0	0	0	0	0	0
0	0	0	0	0	0
0	0	0	0	0	0
0	0	0	0	0	0
0	0	0	0	0	0
0	0	0	0	0	0
0	0	0	0	0	0
0	0	0	0	0	0
0	0	0	0	0	0
0	0	0	0	0	0
0	0	0	0	0	0
0	0	0	0	0	0
0	0	0	0	0	0
0	0	0	0	0	0
0	0	0	0	0	0
0	0	0	0	0	0
0	0	0	0	0	0
0	0	0	0	0	0
0	0	0	0	0	0
0	0	0	0	0	0
0	0	0	0	0	0
0	0	0	0	0	0
0	0	0	0	0	0
0	0	0	0	0	0
0	0	0	0	0	0
0	0	0	0	0	0
0	0	0	0	0	0
0	0	0	0	0	0
0	0	0	0	0	0
0	0	0	0	0	0
0	0	0	0	0	0
0	0	0	0	0	0
0	0	0	0	0	0
0	0	0	0	0	0
0	0	0	0	0	0
0	0	0	0	0	0
0	0	0	0	0	0
0	0	0	0	0	0
0	0	0	0	0	0
0	0	0	0	0	0
0	0	0	0	0	0
0	0	0	0	0	0
0	0	0	0	0	0
0	0	0	0	0	0
0	0	0	0	0	0
0	0	0	0	0	0
0	0	0	0	0	0
0	0	0	0	0	0
0	0	0	0	0	0
0	0	0	0	0	0
0	0	0	0	0	0
0	0	0	0	0	0
0	0	0	0	0	0
0	0	0	0	0	0
0	0	0	0	0	0
0	0	0	0	0	0
0	0	0	0	0	0
0	0	0	0	0	0
0	0	0	0	0	0
0	0	0	0	0	0
0	0	0	0	0	0
0	0	0	0	0	0
0	0	0	0	0	0
0	0	0	0	0	0
0	0	0	0	0	0
0	0	0	0	0	0
0	0	0	0	0	0
0	0	0	0	0	0
0	0	0	0	0	0
0	0	0	0	0	0
0	0	0	0	0	0
0	0	0	0	0	0
0	0	0	0	0	0
0	0	0	0	0	0
0	0	0	0	0	0
0	0	0	0	0	0
0	0	0	0	0	0
0	0	0	0	0	0
0	0	0	0	0	0
0	0	0	0	0	0
0	0	0	0	0	0
0	0	0	0	0	0
0	0	0	0	0	0
0	0	0	0	0	0
0	0	0	0	0	0
0	0	0	0	0	0
0	0	0	0	0	0
0	0	0	0	0	0
0	0	0	0	0	0
0	0	0	0	0	0
0	0	0	0	0	0
0	0	0	0	0	0
0	0	0	0	0	0
0	0	0	0	0	0
0	0	0	0	0	0
0	0	0	0	0	0
0	0	0	0	0	0
0	0	0	0	0	0
0	0	0	0	0	0
0	0	0	0	0	0
0	0	0	0	0	0
0	0	0	0	0	0
0	0	0	0	0	0
0	0	0	0	0	0
0	0	0	0	0	0
0	0	0	0	0	0
0	0	0	0	0	0
0	0	0	0	0	0
0	0	0	0	0	0
0	0	0	0	0	0
0	0	0	0	0	0
0	0	0	0	0	0
0	0	0	0	0	0
0	0	0	0	0	0
0	0	0	0	0	0
0	0	0	0	0	0
0	0	0	0	0	0
0	0	0	0	0	0
0	0	0	0	0	0
0	0	0	0	0	0
0	0	0	0	0	0
0	0	0	0	0	0
0	0	0	0	0	0
0	0	0	0	0	0
0	0	0	0	0	0
0	0	0	0	0	0
0	0	0	0	0	0
0	0	0	0	0	0
0	0	0	0	0	0
0	0	0	0	0	0
0	0	0	0	0	0
0	0	0	0	0	0
0	0	0	0	0	0
0	0	0	0	0	0
0	0	0	0	0	0
0	0	0	0	0	0
0	0	0	0	0	0
0	0	0	0	0	0
0	0	0	0	0	0
0	0	0	0	0	0
0	0	0	0	0	0
0	0	0	0	0	0
0	0	0	0	0	0
0	0	0	0	0	0
0	0	0	0	0	0
0	0	0	0	0	0
0	0	0	0	0	0
0	0	0	0	0	0
0	0	0	0	0	0
0	0	0	0	0	0
0	0	0	0	0	0
0	0	0	0	0	0
0	0	0	0	0	0
0	0	0	0	0	0
0	0	0	0	0	0
0	0	0	0	0	0
0	0	0	0	0	0
0	0	0	0	0	0
0	0	0	0	0	0
0	0	0	0	0	0
0	0	0	0	0	0
0	0	0	0	0	0
0	0	0	0	0	0
0	0	0	0	0	0
0	0	0	0	0	0
0	0	0	0	0	0
0	0	0	0	0	0
0	0	0	0	0	0
0	0	0	0	0	0
0	0	0	0	0	0
0	0	0	0	0	0
0	0	0	0	0	0
0	0	0	0	0	0
0	0	0	0	0	0
0	0	0	0	0	0
0	0	0	0	0	0
0	0	0	0	0	0
0	0	0	0	0	0
0	0	0	0	0	0
0	0	0	0	0	0
0	0	0	0	0	0
0	0	0	0	0	0
0	0	0	0	0	0
0	0	0	0	0	0
0	0	0	0	0	0
0	0	0	0	0	0
0	0	0	0	0	0
0	0	0	0	0	0
0	0	0	0	0	0
0	0	0	0	0	0
0	0	0	0	0	0
0	0	0	0	0	0
0	0	0	0	0	0
0	0	0	0	0	0
0	0	0	0	0	0
0	0	0	0	0	0
0	0	0	0	0	0
0	0	0	0	0	0
0	0	0	0	0	0
0	0	0	0	0	0
0	0	0	0	0	0
0	0	0	0	0	0
0	0	0	0	0	0
0	0	0	0	0	0
0	0	0	0	0	0
0	0	0	0	0	0
0	0	0	0	0	0
0	0	0	0	0	0
0	0	0	0	0	0
0	0	0	0	0	0
0	0	0	0	0	0
0	0	0	0	0	0
0	0	0	0	0	0
0	0	0	0	0	0
0	0	0	0	0	0
0	0	0	0	0	0
0	0	0	0	0	0
0	0	0	0	0	0
0	0	0	0	0	0
0	0	0	0	0	0
0	0	0	0	0	0
0	0	0	0	0	0
0	0	0	0	0	0
0	0	0	0	0	0
0	0	0	0	0	0
0	0	0	0	0	0
0	0	0	0	0	0
0	0	0	0	0	0
0	0	0	0	0	0
0	0	0	0	0	0
0	0	0	0	0	0
0	0	0	0	0	0
0	0	0	0	0	0
0	0	0	0	0	0
0	0	0	0	0	0
0	0	0	0	0	0
0	0	0	0	0	0
0	0	0	0	0	0
0	0	0	0	0	0
0	0	0	0	0	0
0	0	0	0	0	0
0	0	0	0	0	0
0	0	0	0	0	0
0	0	0	0	0	0
0	0	0	0	0	0
0	0	0	0	0	0
0	0	0	0	0	0
0	0	0	0	0	0
0	0	0	0	0	0
0	0	0	0	0	0
0	0	0	0	0	0
0	0	0	0	0	0
0	0	0	0	0	0
0	0	0	0	0	0
0	0	0	0	0	0
0	0	0	0	0	0
0	0	0	0	0	0
0	0	0	0	0	0
0	0	0	0	0	0
0	0	0	0	0	0
0	0	0	0	0	0
0	0	0	0	0	0
0	0	0	0	0	0
0	0	0	0	0	0
0	0	0	0	0	0
0	0	0	0	0	0
0	0	0	0	0	0
0	0	0	0	0	0
0	0	0	0	0	0
0	0	0	0	0	0
0	0	0	0	0	0
0	0	0	0	0	0
0	0	0	0	0	0
0	0	0	0	0	0
0	0	0	0	0	0
0	0	0	0	0	0
0	0	0	0	0	0
0	0	0	0	0	0
0	0	0	0	0	0
0	0	0	0	0	0
0	0	0	0	0	0
0	0	0	0	0	0
0	0	0	0	0	0
0	0	0	0	0	0
0	0	0	0	0	0
0	0	0	0	0	0
0	0	0	0	0	0
0	0	0	0	0	0
0	0	0	0	0	0
0	0	0	0	0	0
0	0	0	0	0	0
0	0	0	0	0	0
0	0	0	0	0	0
0	0	0	0	0	0
0	0	0	0	0	0
0	0	0	0	0	0
0	0	0	0	0	0
0	0	0	0	0	0
0	0	0	0	0	0
0	0	0	0	0	0
0	0	0	0	0	0
0	0	0	0	0	0
0	0	0	0	0	0
0	0	0	0	0	0
0	0	0	0	0	0
0	0	0	0	0	0
0	0	0	0	0	0
0	0	0	0	0	0
0	0	0	0	0	0
0	0	0	0	0	0
0	0	0	0	0	0
0	0	0	0		0
0	0	0	0		0
0	0	0	0		0
0	0	0	0		0
0	0	0	0		0
0	0	0	0		0
0	0	0	0		0
0	0	0	0		0
0	0	0	0		0
0	0	0	0		0
0	0	0	0		0
0	0	0	0		0
0	0	0	0		0
0	0	0	0		0
0	0	0	0		0
0	0	0	0		0
0	0	0	0		0
0	0	0	0		0
0	0	0	0		0
0	0	0	0		0
0	0	0	0		0
0	0	0	0		0
0	0	0	0		0
0	0	0	0		0
0	0	0	0		0
0	0	0	0		0
0	0	0	0		0
0	0	0	0		0
0	0	0	0		0
0	0	0	0		0
0	0	0	0		0
0	0	0	0		0
0	0	0	0		0
0	0	0	0		0
0	0	0	0		0
0	0	0	0		0
0	0	0	0		0
0	0	0	0		0
0	0	0	0		0
0	0	0	0		0
0	0	0	0		0
0	0	0	0		0
0	0	0	0		0
0	0	0	0		0
0	0	0	0		0
0	0	0	0		0
0	0	0	0		0
0	0	0	0		0
0	0	0	0		0
0	0	0	0		0
0	0	0	0		0
0	0	0	0		0
0	0	0	0		0
0	0	0	0		0
0	0	0	0		0
0	0	0	0		0
0	0	0	0		0
0	0	0	0		0
0	0	0	0		0
0	0	0	0		0
0	0	0	0		0
0	0	0	0		0
0	0	0	0		0
0	0	0	0		0
0	0	0	0		0
0	0	0	0		0
0	0	0	0		0
0	0	0	0		0
0	0	0	0		0
0	0	0	0		0
0	0	0	0		0
0	0	0	0		0
0	0	0	0		0
0	0	0	0		0
0	0	0	0		0
0	0	0	0		0
0	0	0	0		0
0	0	0	0
0	0	0	0
0	0	0	0
0	0	0	0
0	0	0	0
0	0	0	0
0	0	0	0
0	0	0	0
	0	0	0
	0	0	0
	0	0	0
	0	0	0
	0	0	0
	0	0	0
	0	0	0
	0	0	0
	0	0	0
	0	0	0
	0	0	0
	0	0	0
	0	0	0
	0	0	0
	0	0	0
	0	0	0
	0	0	0
	0	0	0
	0	0	0
	0	0	0
	0	0	0
	0	0	0
	0	0	0
	0	0	0
	0	0	0
	0	0	0
	0	0	0
	0	0	0
	0	0	0
	0	0	0
	0	0	0
	0	0	0
	0	0
	0	0
	0	0
	0	0
	0	0
	0	0
	0	0
	0	0
	0	0
	0	0
	0	0
	0	0
	0	0
	0	0
	0	0
	0
	0
	0
	0
	0
	0
	0
	0
	0
	0

## Sheet: Figure 4D and Dprime
Ctrl Low	Ctrl High	Noc Low	Noc High	Taxol Low	Taxol High			Cluster #	Ctrl Low	Ctrl High	Noc Low	Noc High	Taxol Low	Taxol High			Statistical significance calculated using Kruskal-Wallis test of each condition compared to every other condition
2	7	2	7	2	6			0	88.8889	75.2809	87.5817	64.8649	85.2273	87.3239			Number of families	1
2	6	2	6	2	5			1	8.88889	17.9775	11.1111	19.656	12.5	11.2676			Number of comparisons per family	15
2	4	1	6	1	1			2	2.22222	2.99625	1.30719	7.86241	2.27273	0			Alpha	0.05
1	3	1	6	1	1			3	0	2.62172	0	5.97826	0	0
1	3	1	6	1	1			>3	0	1.1236	0	4.6798	0	1.40845			Dunn's multiple comparisons test	Mean rank diff.	Significant?	Summary	Adjusted P Value
1	3	1	5	1	1												Ctrl Low vs. Ctrl High	-81.74	Yes	*	0.0331	A-B
1	3	1	5	1	1												Ctrl Low vs. Noc Low	-6.141	No	ns	>0.9999	A-C
1	3	1	5	1	1												Ctrl Low vs. Noc High	-151.1	Yes	****	<0.0001	A-D
1	3	1	5	1	1												Ctrl Low vs. Taxol Low	-20.23	No	ns	>0.9999	A-E
1	3	1	5	1	1												Ctrl Low vs. Taxol High	-8.496	No	ns	>0.9999	A-F
1	2	1	4	1	1												Ctrl High vs. Noc Low	75.59	Yes	*	0.0479	B-C
1	2	1	4	1	1												Ctrl High vs. Noc High	-69.38	Yes	**	0.0074	B-D
1	2	1	4	1	1												Ctrl High vs. Taxol Low	61.5	No	ns	0.7175	B-E
1	2	1	4	0	1												Ctrl High vs. Taxol High	73.24	No	ns	0.0793	B-F
1	2	1	4	0	1												Noc Low vs. Noc High	-145	Yes	****	<0.0001	C-D
0	2	1	4	0	1												Noc Low vs. Taxol Low	-14.09	No	ns	>0.9999	C-E
0	2	1	4	0	1												Noc Low vs. Taxol High	-2.355	No	ns	>0.9999	C-F
0	2	1	4	0	1												Noc High vs. Taxol Low	130.9	Yes	***	0.0002	D-E
0	1	1	4	0	0												Noc High vs. Taxol High	142.6	Yes	****	<0.0001	D-F
0	1	0	3	0	0												Taxol Low vs. Taxol High	11.74	No	ns	>0.9999	E-F
0	1	0	3	0	0
0	1	0	3	0	0												Test details	Mean rank 1	Mean rank 2	Mean rank diff.	n1	n2	Z
0	1	0	3	0	0												Ctrl Low vs. Ctrl High	523.3	605	-81.74	135	267	3.061
0	1	0	3	0	0												Ctrl Low vs. Noc Low	523.3	529.4	-6.141	135	153	0.2057
0	1	0	3	0	0												Ctrl Low vs. Noc High	523.3	674.4	-151.1	135	407	6.018
0	1	0	3	0	0												Ctrl Low vs. Taxol Low	523.3	543.5	-20.23	135	88	0.5841
0	1	0	3	0	0												Ctrl Low vs. Taxol High	523.3	531.8	-8.496	135	142	0.2795
0	1	0	3	0	0												Ctrl High vs. Noc Low	605	529.4	75.59	267	153	2.949
0	1	0	3	0	0												Ctrl High vs. Noc High	605	674.4	-69.38	267	407	3.484
0	1	0	3	0	0												Ctrl High vs. Taxol Low	605	543.5	61.5	267	88	1.979
0	1	0	2	0	0												Ctrl High vs. Taxol High	605	531.8	73.24	267	142	2.789
0	1	0	2	0	0												Noc Low vs. Noc High	529.4	674.4	-145	153	407	6.046
0	1	0	2	0	0												Noc Low vs. Taxol Low	529.4	543.5	-14.09	153	88	0.4166
0	1	0	2	0	0												Noc Low vs. Taxol High	529.4	531.8	-2.355	153	142	0.07992
0	1	0	2	0	0												Noc High vs. Taxol Low	674.4	543.5	130.9	407	88	4.403
0	1	0	2	0	0												Noc High vs. Taxol High	674.4	531.8	142.6	407	142	5.787
0	1	0	2	0	0												Taxol Low vs. Taxol High	543.5	531.8	11.74	88	142	0.3422
0	1	0	2	0	0
0	1	0	2	0	0
0	1	0	2	0	0
0	1	0	2	0	0
0	1	0	2	0	0
0	1	0	2	0	0
0	1	0	2	0	0
0	1	0	2	0	0
0	1	0	2	0	0
0	1	0	2	0	0
0	1	0	2	0	0
0	1	0	2	0	0
0	1	0	2	0	0
0	1	0	2	0	0
0	1	0	2	0	0
0	1	0	2	0	0
0	1	0	2	0	0
0	1	0	2	0	0
0	1	0	2	0	0
0	1	0	2	0	0
0	1	0	2	0	0
0	1	0	2	0	0
0	1	0	2	0	0
0	1	0	2	0	0
0	1	0	2	0	0
0	1	0	2	0	0
0	1	0	1	0	0
0	1	0	1	0	0
0	1	0	1	0	0
0	0	0	1	0	0
0	0	0	1	0	0
0	0	0	1	0	0
0	0	0	1	0	0
0	0	0	1	0	0
0	0	0	1	0	0
0	0	0	1	0	0
0	0	0	1	0	0
0	0	0	1	0	0
0	0	0	1	0	0
0	0	0	1	0	0
0	0	0	1	0	0
0	0	0	1	0	0
0	0	0	1	0	0
0	0	0	1	0	0
0	0	0	1	0	0
0	0	0	1	0	0
0	0	0	1	0	0
0	0	0	1	0	0
0	0	0	1	0	0
0	0	0	1	0	0
0	0	0	1	0	0
0	0	0	1		0
0	0	0	1		0
0	0	0	1		0
0	0	0	1		0
0	0	0	1		0
0	0	0	1		0
0	0	0	1		0
0	0	0	1		0
0	0	0	1		0
0	0	0	1		0
0	0	0	1		0
0	0	0	1		0
0	0	0	1		0
0	0	0	1		0
0	0	0	1		0
0	0	0	1		0
0	0	0	1		0
0	0	0	1		0
0	0	0	1		0
0	0	0	1		0
0	0	0	1		0
0	0	0	1		0
0	0	0	1		0
0	0	0	1		0
0	0	0	1		0
0	0	0	1		0
0	0	0	1		0
0	0	0	1		0
0	0	0	1		0
0	0	0	1		0
0	0	0	1		0
0	0	0	1		0
0	0	0	1		0
0	0	0	1		0
0	0	0	1		0
0	0	0	1		0
0	0	0	1		0
0	0	0	1		0
0	0	0	1		0
0	0	0	1		0
0	0	0	1		0
0	0	0	1		0
0	0	0	1		0
0	0	0	1		0
0	0	0	1		0
0	0	0	1		0
0	0	0	1		0
	0	0	1		0
	0	0	1		0
	0	0	1		0
	0	0	1		0
	0	0	1		0
	0	0	1		0
	0	0	1		0
	0	0	1
	0	0	0
	0	0	0
	0	0	0
	0	0	0
	0	0	0
	0	0	0
	0	0	0
	0	0	0
	0	0	0
	0	0	0
	0		0
	0		0
	0		0
	0		0
	0		0
	0		0
	0		0
	0		0
	0		0
	0		0
	0		0
	0		0
	0		0
	0		0
	0		0
	0		0
	0		0
	0		0
	0		0
	0		0
	0		0
	0		0
	0		0
	0		0
	0		0
	0		0
	0		0
	0		0
	0		0
	0		0
	0		0
	0		0
	0		0
	0		0
	0		0
	0		0
	0		0
	0		0
	0		0
	0		0
	0		0
	0		0
	0		0
	0		0
	0		0
	0		0
	0		0
	0		0
	0		0
	0		0
	0		0
	0		0
	0		0
	0		0
	0		0
	0		0
	0		0
	0		0
	0		0
	0		0
	0		0
	0		0
	0		0
	0		0
	0		0
	0		0
	0		0
	0		0
	0		0
	0		0
	0		0
	0		0
	0		0
	0		0
	0		0
	0		0
	0		0
	0		0
	0		0
	0		0
	0		0
	0		0
	0		0
	0		0
	0		0
	0		0
	0		0
	0		0
	0		0
	0		0
	0		0
	0		0
	0		0
	0		0
	0		0
	0		0
	0		0
	0		0
	0		0
	0		0
	0		0
	0		0
	0		0
	0		0
	0		0
	0		0
	0		0
	0		0
	0		0
	0		0
	0		0
	0		0
	0		0
	0		0
			0
			0
			0
			0
			0
			0
			0
			0
			0
			0
			0
			0
			0
			0
			0
			0
			0
			0
			0
			0
			0
			0
			0
			0
			0
			0
			0
			0
			0
			0
			0
			0
			0
			0
			0
			0
			0
			0
			0
			0
			0
			0
			0
			0
			0
			0
			0
			0
			0
			0
			0
			0
			0
			0
			0
			0
			0
			0
			0
			0
			0
			0
			0
			0
			0
			0
			0
			0
			0
			0
			0
			0
			0
			0
			0
			0
			0
			0
			0
			0
			0
			0
			0
			0
			0
			0
			0
			0
			0
			0
			0
			0
			0
			0
			0
			0
			0
			0
			0
			0
			0
			0
			0
			0
			0
			0
			0
			0
			0
			0
			0
			0
			0
			0
			0
			0
			0
			0
			0
			0
			0
			0
			0
			0
			0
			0
			0
			0
			0
			0
			0
			0
			0
			0
			0
			0
			0
			0
			0
			0

## Sheet: Figure 4E and Eprime
Ctrl Low	Ctrl High	Noc Low	Noc High	Taxol Low	Taxol High		Cluster #	Ctrl Low	Ctrl High	Noc Low	Noc High	Taxol Low	Taxol High		Statistical significance calculated using Kruskal-Wallis test of each condition compared to every other condition
2	7	2	7	2	6		1	80	72.7273	84.2105	55.9441	84.6154	88.8889		Number of families	1
2	6	2	6	2	5		2	20	12.1212	13.1579	23.0769	15.3846	11.1111		Number of comparisons per family	15
2	4	1	6	1	1		3	0	10.6061	2.63158	7.69231	0	0		Alpha	0.05
1	3	1	6	1	1		4	0	2.67857	0	13.2867	0	0
1	3	1	6	1	1										Dunn's multiple comparisons test	Mean rank diff.	Significant?	Summary	Adjusted P Value
1	3	1	5	1	1										Ctrl Low vs. Ctrl High	-14.56	No	ns	>0.9999	A-B
1	3	1	5	1	1										Ctrl Low vs. Noc Low	10.99	No	ns	>0.9999	A-C
1	3	1	5	1	1										Ctrl Low vs. Noc High	-37.49	No	ns	0.5411	A-D
1	3	1	5	1	1										Ctrl Low vs. Taxol Low	5.354	No	ns	>0.9999	A-E
1	3	1	5	1	1										Ctrl Low vs. Taxol High	3.867	No	ns	>0.9999	A-F
1	2	1	4	1	1										Ctrl High vs. Noc Low	25.55	No	ns	>0.9999	B-C
1	2	1	4	1	1										Ctrl High vs. Noc High	-22.93	No	ns	0.2906	B-D
1	2	1	4	1	1										Ctrl High vs. Taxol Low	19.91	No	ns	>0.9999	B-E
1	2	1	4		1										Ctrl High vs. Taxol High	18.42	No	ns	>0.9999	B-F
1	2	1	4		1										Noc Low vs. Noc High	-48.47	Yes	*	0.0388	C-D
	2	1	4		1										Noc Low vs. Taxol Low	-5.636	No	ns	>0.9999	C-E
	2	1	4		1										Noc Low vs. Taxol High	-7.123	No	ns	>0.9999	C-F
	2	1	4		1										Noc High vs. Taxol Low	42.84	No	ns	0.3722	D-E
	1	1	4												Noc High vs. Taxol High	41.35	No	ns	0.1814	D-F
	1		3												Taxol Low vs. Taxol High	-1.487	No	ns	>0.9999	E-F
	1		3
	1		3												Test details	Mean rank 1	Mean rank 2	Mean rank diff.	n1	n2	Z
	1		3												Ctrl Low vs. Ctrl High	115.7	130.3	-14.56	15	66	0.7724
	1		3												Ctrl Low vs. Noc Low	115.7	104.7	10.99	15	19	0.4829
	1		3												Ctrl Low vs. Noc High	115.7	153.2	-37.49	15	143	2.096
	1		3												Ctrl Low vs. Taxol Low	115.7	110.3	5.354	15	13	0.2144
	1		3												Ctrl Low vs. Taxol High	115.7	111.8	3.867	15	18	0.1679
	1		3												Ctrl High vs. Noc Low	130.3	104.7	25.55	66	19	1.489
	1		3												Ctrl High vs. Noc High	130.3	153.2	-22.93	66	143	2.338
	1		3												Ctrl High vs. Taxol Low	130.3	110.3	19.91	66	13	0.9959
	1		2												Ctrl High vs. Taxol High	130.3	111.8	18.42	66	18	1.052
	1		2												Noc Low vs. Noc High	104.7	153.2	-48.47	19	143	3.013
	1		2												Noc Low vs. Taxol Low	104.7	110.3	-5.636	19	13	0.2376
	1		2												Noc Low vs. Taxol High	104.7	111.8	-7.123	19	18	0.3286
	1		2												Noc High vs. Taxol Low	153.2	110.3	42.84	143	13	2.244
	1		2												Noc High vs. Taxol High	153.2	111.8	41.35	143	18	2.509
	1		2												Taxol Low vs. Taxol High	110.3	111.8	-1.487	13	18	0.06201
	1		2
	1		2
	1		2
	1		2
	1		2
	1		2
	1		2
	1		2
	1		2
	1		2
	1		2
	1		2
	1		2
	1		2
	1		2
	1		2
	1		2
	1		2
	1		2
	1		2
	1		2
	1		2
	1		2
	1		2
	1		2
	1		2
	1		1
	1		1
	1		1
			1
			1
			1
			1
			1
			1
			1
			1
			1
			1
			1
			1
			1
			1
			1
			1
			1
			1
			1
			1
			1
			1
			1
			1
			1
			1
			1
			1
			1
			1
			1
			1
			1
			1
			1
			1
			1
			1
			1
			1
			1
			1
			1
			1
			1
			1
			1
			1
			1
			1
			1
			1
			1
			1
			1
			1
			1
			1
			1
			1
			1
			1
			1
			1
			1
			1
			1
			1
			1
			1
			1
			1
			1
			1
			1
			1
			1

## Sheet: Figure 4F and Fprime
Control High	Non	Cluster	Control Low	Non	Cluster	Noc High	Non	Cluster	Noc Low	Non	Cluster	Taxol High	Non	Cluster	Taxol Low	Non	Cluster			Clustered Events									Non-clustered Events
	0	0		0	0		4	36		0	0		0	0		0	0			Statistical significance calculated using Kruskal-Wallis test of each condition compared to every other condition									Statistical significance calculated using Kruskal-Wallis test of each condition compared to every other condition
	1	0		1	0		1	0		2	0		1	0		1	0			Number of families	1								Number of families	1
	0	0		1	0		0	0		0	0		0	0		0	0			Number of comparisons per family	15								Number of comparisons per family	15
	0	0		3	0		2	0		1	0		1	0		0	0			Alpha	0.05								Alpha	0.05
	0	0		0	0		3	0		1	0		2	0		0	0
	0	0		3	0		4	5		0	0		0	0		0	0			Dunn's multiple comparisons test	Mean rank diff.	Significant?	Summary	Adjusted P Value					Dunn's multiple comparisons test	Mean rank diff.	Significant?	Summary	Adjusted P Value
	1	0		2	0		3	2		0	0		0	0		0	0			Ctrl Low vs. Ctrl High	-96.72	Yes	*	0.0116	A-B				Ctrl Low vs. Ctrl High	-66.16	No	ns	0.9391	A-B
	3	0		2	0		1	0		0	0		0	0		0	0			Ctrl Low vs. Noc Low	-0.03548	No	ns	>0.9999	A-C				Ctrl Low vs. Noc Low	110.5	No	ns	0.0828	A-C
	2	7		4	0		2	0		0	0		0	0		0	0			Ctrl Low vs. Noc High	-188.7	Yes	****	<0.0001	A-D				Ctrl Low vs. Noc High	-154.9	Yes	****	<0.0001	A-D
	0	0		4	0		0	0		0	0		2	3		2	0			Ctrl Low vs. Taxol Low	-20.34	No	ns	>0.9999	A-E				Ctrl Low vs. Taxol Low	57.19	No	ns	>0.9999	A-E
	0	0		0	0		2	1		0	0		0	0		10	1			Ctrl Low vs. Taxol High	-23.15	No	ns	>0.9999	A-F				Ctrl Low vs. Taxol High	94.39	No	ns	0.2993	A-F
	0	0		0	0		4	4		2	0		1	0		0	0			Ctrl High vs. Noc Low	96.69	Yes	**	0.0081	B-C				Ctrl High vs. Noc Low	176.7	Yes	****	<0.0001	B-C
	8	60		0	0		1	0		0	0		0	0		2	0			Ctrl High vs. Noc High	-91.95	Yes	***	0.0003	B-D				Ctrl High vs. Noc High	-88.74	Yes	*	0.0122	B-D
	7	31		0	0		3	36		0	0		1	0		0	0			Ctrl High vs. Taxol Low	76.38	No	ns	0.3627	B-E				Ctrl High vs. Taxol Low	123.4	Yes	*	0.0482	B-E
	11	12		0	0		5	18		0	0		0	0		0	0			Ctrl High vs. Taxol High	73.57	No	ns	0.1527	B-F				Ctrl High vs. Taxol High	160.6	Yes	****	<0.0001	B-F
	14	58		0	0		0	0		0	0		0	0		0	0			Noc Low vs. Noc High	-188.6	Yes	****	<0.0001	C-D				Noc Low vs. Noc High	-265.4	Yes	****	<0.0001	C-D
	14	12		0	0		4	20		0	0		1	0		0	0			Noc Low vs. Taxol Low	-20.31	No	ns	>0.9999	C-E				Noc Low vs. Taxol Low	-53.34	No	ns	>0.9999	C-E
	4	0		0	0		2	0		0	0		0	0		0	0			Noc Low vs. Taxol High	-23.12	No	ns	>0.9999	C-F				Noc Low vs. Taxol High	-16.13	No	ns	>0.9999	C-F
	2	0		0	0		1	0		0	0		0	0		0	0			Noc High vs. Taxol Low	168.3	Yes	****	<0.0001	D-E				Noc High vs. Taxol Low	212.1	Yes	****	<0.0001	D-E
	1	0		2	0					0	0		0	0		0	0			Noc High vs. Taxol High	165.5	Yes	****	<0.0001	D-F				Noc High vs. Taxol High	249.3	Yes	****	<0.0001	D-F
	8	7		0	0		2	0		0	0		0	0		0	0			Taxol Low vs. Taxol High	-2.808	No	ns	>0.9999	E-F				Taxol Low vs. Taxol High	37.2	No	ns	>0.9999	E-F
	2	0		0	0		0	63		0	0		0	0		0	0
	0	0		0	0		0	0		0	0		0	0		0	0			Test details	Mean rank 1	Mean rank 2	Mean rank diff.	n1	n2	Z			Test details	Mean rank 1	Mean rank 2	Mean rank diff.	n1	n2	Z
	1	4		0	0		0	0		5	7		0	0		1	2			Ctrl Low vs. Ctrl High	519.9	616.7	-96.72	140	267	3.363			Ctrl Low vs. Ctrl High	571.6	637.8	-66.16	140	267	1.862
	1	8		0	0		0	0		5	3									Ctrl Low vs. Noc Low	519.9	520	-0.03548	140	153	0.001101			Ctrl Low vs. Noc Low	571.6	461.1	110.5	140	153	2.775
	1	0		0	0		2	0		0	0		0	0		0	0			Ctrl Low vs. Noc High	519.9	708.6	-188.7	140	433	7.04			Ctrl Low vs. Noc High	571.6	726.5	-154.9	140	433	4.679
	2	7		0	0		1	7		0	0		1	0		0	0			Ctrl Low vs. Taxol Low	519.9	540.3	-20.34	140	88	0.5425			Ctrl Low vs. Taxol Low	571.6	514.4	57.19	140	88	1.234
	0	0		0	0		2	3		2	0		0	0		0	0			Ctrl Low vs. Taxol High	519.9	543.1	-23.15	140	142	0.7052			Ctrl Low vs. Taxol High	571.6	477.2	94.39	140	142	2.327
	0	0		1	0		0	0		0	0		0	0		0	0			Ctrl High vs. Noc Low	616.7	520	96.69	267	153	3.459			Ctrl High vs. Noc Low	637.8	461.1	176.7	267	153	5.117
	1	0		0	0		1	0					0	0		0	0			Ctrl High vs. Noc High	616.7	708.6	-91.95	267	433	4.287			Ctrl High vs. Noc High	637.8	726.5	-88.74	267	433	3.349
				0	0		1	0		0	0		1	0		0	0			Ctrl High vs. Taxol Low	616.7	540.3	76.38	267	88	2.254			Ctrl High vs. Taxol Low	637.8	514.4	123.4	267	88	2.947
	0	0					6	3		0	0		0	0		0	0			Ctrl High vs. Taxol High	616.7	543.1	73.57	267	142	2.57			Ctrl High vs. Taxol High	637.8	477.2	160.6	267	142	4.539
	0	0		1	0		0	0		0	0		0	0		0	0			Noc Low vs. Noc High	520	708.6	-188.6	153	433	7.276			Noc Low vs. Noc High	461.1	726.5	-265.4	153	433	8.287
	4	0		0	0		14	11		0	0		0	0		0	0			Noc Low vs. Taxol Low	520	540.3	-20.31	153	88	0.5507			Noc Low vs. Taxol Low	461.1	514.4	-53.34	153	88	1.171
	1	0		4	0		3	7		0	0		0	0		0	0			Noc Low vs. Taxol High	520	543.1	-23.12	153	142	0.7197			Noc Low vs. Taxol High	461.1	477.2	-16.13	153	142	0.4066
	1	0		0	0		4	3		1	0		0	0		0	0			Noc High vs. Taxol Low	708.6	540.3	168.3	433	88	5.222			Noc High vs. Taxol Low	726.5	514.4	212.1	433	88	5.326
	0	0		0	0		3	0		0	0		0	0		1	0			Noc High vs. Taxol High	708.6	543.1	165.5	433	142	6.209			Noc High vs. Taxol High	726.5	477.2	249.3	433	142	7.57
	2	0		0	0		1	10		0	0		0	0		1	0			Taxol Low vs. Taxol High	540.3	543.1	-2.808	88	142	0.07509			Taxol Low vs. Taxol High	514.4	477.2	37.2	88	142	0.8053
	1	0		0	0		0	0		0	0		0	0		0	0
	0	0		0	0		7	6		4	0		0	0		0	0
	1	0		7	0		13	14		0	0		1	0		0	0
	0	0		1	0		4	19		0	0		0	0		0	0
	0	0		0	0		0	0		0	0		0	0		1	0
	2	0		0	0		3	42		0	0		2	5		0	0
	1	0		0	0					1	0		4	3		1	0
	0	0		0	0		0	0		0	0		2	0		0	0
	0	0		0	0		0	0		0	0					0	0
	0	0		0	0		4	8		0	0		0	0		0	0
	0	0		0	0		1	0		3	3		2	0		0	0
	2	0		0	0		0	0		0	0		0	0		5	0
	5	0		0	0		1	0		0	0		2	5		2	0
	1	0		0	0		0	0		0	0		1	0		0	0
	1	0		0	0		0	0		0	0		0	0		0	0
	1	0		0	0		0	0		4	0		0	0		1	0
	1	0		0	0		0	0		0	0		2	0		0	0
	0	0		0	0		0	0		1	0		0	0		2	0
	0	0		0	0		1	0		0	0		0	0		0	0
	0	0		0	0		0	0		1	0		0	0		0	0
	5	0		0	0		0	0		0	0		0	0		0	0
	1	3		1	0		0	0					5	0
	0	0		0	0		0	0		0	0					0	0
	0	0					0	0		0	0		0	0		0	0
	0	0		1	0		0	0		0	0		0	0		0	0
	0	0		0	0		2	0		1	0		0	0		0	0
	0	0		1	0		0	0		0	0		0	0		0	0
	1	0		0	0		0	0		1	0		0	0		0	3
	0	0		1	5		0	0		0	0		0	0		0	0
	1	0		0	0		1	0		0	0		0	0		0	0
	0	0		3	0		1	0		0	0		0	0		0	0
	0	0		8	9		0	0		0	0		0	0		0	0
	0	0		9	0		0	0		0	0		0	0		0	0
	0	0		4	3		0	0		1	0		0	0		1	0
	0	0		6	4		0	0		0	0		0	0		0	0
				0	0		0	0		0	0		0	0		0	0
	1	0		6	0					0	0		0	0		0	0
	0	0		5	0		0	0		0	0		0	0		0	0
	0	0		9	8		0	0		0	0		0	0		0	0
	0	0		2	0		1	0		0	0		0	0		2	0
	0	0		1	0		2	0		0	0		0	0		0	0
	2	0		8	0		0	0		0	0		0	0		0	0
	0	0		1	0		2	2		0	0		0	0		0	0
	0	0		1	0		0	0		1	0		0	0		0	0
	0	0		0	0		8	6		0	0		0	0		0	0
	0	0		0	0		3	0		1	0		0	0		0	0
	3	0		0	0		4	0		0	0		0	0		0	0
	0	0		3	0		0	0		0	0		0	0		0	0
	3	0		0	0		0	0		0	0		1	0		0	0
	0	0		0	0		0	0		0	0		1	0		0	0
	0	0		0	0		0	0		0	0		1	0		0	0
	1	0		0	0		0	0		1	0		0	0		0	0
	0	0		0	0		0	0		1	0		0	0		0	0
	5	0		0	0		0	0		1	0		0	0		1	0
	0	0		1	0		1	0		0	0		0	0		1	0
	2	0		1	0		2	15		1	0		0	0
	0	0		2	0		1	0		0	0		0	0		0	0
	0	0		4	3		1	3		0	0		0	0		1	0
	0	0		0	0		1	0		0	0		0	0		0	0
	0	0		0	0		1	0		0	0		0	0		1	0
	0	0		0	0								0	0		4	0
				0	0		1	0		0	0		0	0		2	0
	0	0		0	0		4	0		0	0		0	0		1	0
	0	3		0	0		1	0		0	0					1	0
	0	0		0	5		3	0		0	0		0	0		0	0
	10	8		2	0		0	0		0	0		0	0		0	0
	0	0		5	0		3	10		0	0		0	0		1	0
	14	20		3	0		0	0		0	0		3	0		0	0
	4	0					2	0		0	0		0	0		0	0
	1	0		0	0		0	0		0	0		1	0		0	0
	3	0		0	0		4	0		0	0		0	0		0	0
	7	0		4	0		1	5		0	0		0	0		0	0
	1	0		2	0		2	0		0	0		0	0		1	0
	2	0		0	0		1	0		0	0		0	0		0	0
	3	0		1	0		1	0		0	0		0	0		0	0
	0	0		0	0		1	0		0	0		0	0		0	0
	1	0		0	0		1	0		0	0		0	0		1	0
	14	13		0	0		3	0		1	0		0	0		0	0
	4	6		0	0		2	0		0	0		0	0		0	0
	6	3		0	0		2	0		0	0		0	0		0	0
	0	0		5	0		2	0		0	0		7	0		0	0
	10	3		0	1		3	0		0	0		0	0		3	0
	1	0		0	0		1	0		0	3		0	0		0	0
	2	0		0	0		1	0		0	0		3	0
	1	0		0	0		1	0		5	0		0	0		0	0
	2	0		0	0		0	0		0	0		1	0		5	0
	3	0		2	4		1	0		0	0		0	0		6	0
	4	0		0	0		0	0		0	0		0	0		1	8
	5	0		0	0		6	15		0	0		0	0		1	0
	0	0		0	0		3	31		0	0		0	0		1	6
	0	0		0	0		5	17		0	0		0	0		0	0
	1	0		0	0		1	0		1	0					0	0
	0	0		0	0		0	0		0	0		0	0		0	0
	0	0					3	4		0	0		1	0		1	0
	0	0		0	0		0	0		0	0		0	0		0	0
				1	5		5	4		1	0		2	0		0	0
	0	0		3	0		2	0		0	0		0	0		2	0
	2	0		2	0		2	0		0	0		0	0		0	0
	3	0		2	0		11	0		0	0		1	0		0	0
	0	0		0	0		0	0		1	0		1	0		0	0
	3	0		0	0		5	32		1	0		5	0		0	0
	1	0		5	0		2	0		3	0		2	0		0	0
	2	0		0	0		3	0		1	0		0	0		0	0
	0	0		0	0		7	51		0	0		0	0		0	0
	0	0		0	0					0	0		5	0		0	0
	3	0		0	0		6	89		2	0		5	3		0	0
	0	0		0	0		6	2		0	0		2	0		0	0
	0	0		0	0		5	0		1	0		3	0		0	0
	1	0		0	0		0	0		0	0		0	0		0	0
	0	0		0	0		5	13					0	0		0	0
	3	1		0	0		3	0		0	0		0	0		0	0
	0	0		0	0		0	0		2	0		0	0		0	0
	3	4		0	0		0	1		0	0		1	0		0	0
	3	3		0	0		10	13		0	0		1	0		6	0
	9	0		0	0		6	0		1	0		0	0
	1	3		2	0		5	21		1	0					0	0
	0	5		0	0		2	5		0	3		0	0		2	0
	1	0		0	0		10	6		0	0		0	0		0	0
	0	0					14	17		0	0		0	0		0	0
	4	4		0	0		5	18		1	0		0	0		0	0
	3	0		3	0		16	37		1	0		0	0		1	0
	1	0		0	0		6	0		0	0		0	0		0	0
	2	3		0	0		0	0		0	0		0	0		0	0
	0	0		0	0		4	8		0	0		0	0		0	0
	0	0		0	0		10	8		1	0		0	0		1	0
	0	0		0	0		6	0		0	0		0	0		0	0
	2	0		0	0		4	0		0	0		1	0		0	0
	2	0		0	0		19	31		1	0		1	0		0	0
	0	0		0	0		1	1		0	0		0	0		0	0
				0	0		1	0		0	0		0	0		1	0
	0	0		0	0		4	0		2	0		0	0		0	0
	0	0		4	0		5	3		1	0		3	0		0	0
	0	0		1	0		9	0		0	0		0	0		0	0
	0	0		2	0		3	0		1	0		1	0		2	0
	0	0		0	0		10	0		1	0		1	0		0	0
	0	0		0	0		2	3		1	0		0	0		0	0
	0	0		0	0		4	0		2	0		0	0
	4	0		1	0		13	8		0	0		0	0		0	0
	0	0		0	0		7	58		0	0		3	0		1	0
	0	0		0	0		5	16		0	0		1	0		0	0
	0	0		0	0		10	24		0	0		0	0		0	0
	0	0		0	0		5	12		0	0		5	0		1	0
	2	0		0	0		5	2		0	0		0	0		0	0
	1	0		1	0								2	0		6	3
	1	0		0	0		0	0		0	0		0	0		4	0
	0	0		0	0		1	0		0	0		0	0		1	4
	0	0		2	0		0	0		0	0		0	0		0	0
	1	0		0	0		0	0		0	0		0	0		0	0
	1	0		2	0		2	0		0	0		0	0		0	0
	0	0		1	0		0	0		1	0		0	0		0	0
	0	0					3	0		0	0		0	3		0	0
	0	0		0	0		2	0		0	0					0	0
	0	0		3	0		2	0		0	0		1	0		0	0
	0	0		0	0		0	0		1	0		0	0		0	0
	1	0		0	0		0	0		0	0		0	0		0	0
	0	0		0	0		1	0		0	0		0	0		0	0
	1	0		0	0		0	0		0	0		0	0		0	0
	0	0		0	0		0	0		0	0		1	0		0	0
	0	0		0	0		1	0		0	0		0	0		0	0
	0	0		0	0		4	0		0	0		0	0		0	0
	0	0		0	0		2	0		1	0		0	0		0	0
	0	0		0	0		0	0		0	0		0	0		0	0
	1	0		0	0		3	0		0	0		0	0		0	0
	1	0		4	0		0	0		0	0		0	0		0	0
	0	0		1	0		3	0		0	0		0	0		0	0
	0	0		2	0		0	0		0	0		1	0		1	0
				0	0		2	0		0	0		0	0		0	0
	0	0		0	0		0	0		0	0		1	0		0	0
	3	0		0	0		1	0		0	0		0	0		1	0
	0	0		1	0		11	0		1	0		0	0		0	0
	0	0		0	0		2	0		0	0		0	0		0	0
	0	0		0	0		6	0		0	0		0	0		0	0
	0	0		0	0		2	0		1	0		1	0		0	0
	0	0		0	0		1	2		2	0		0	0		0	0
	1	0		0	0		1	0		1	0		0	0		1	0
	1	0		1	0		1	0		1	0		0	0
	1	0		0	0		0	0		0	0		0	0		6	0
	0	0		0	0		0	0		0	0		0	0		0	0
	0	0		2	0		0	1		0	0		1	0		0	0
	0	0		0	0		0	0		2	0		0	0		0	0
	1	0		2	0					6	0		0	0		0	0
	0	0					0	0		0	0		0	0		0	0
	0	0		0	0		2	21		0	0		0	0		0	0
	0	0		0	0		3	36		0	0		0	0		0	0
	0	0		1	0		6	11		0	0		0	0		0	0
	0	0		2	0		1	31		0	0		0	0		0	0
	0	0		0	0		6	14					0	0		0	0
	0	0		0	0		4	2		0	0		0	0		0	0
	0	0		0	0		4	0		0	0		0	0		0	0
	0	0		0	0		9	1		0	0					0	0
	0	0		0	0		0	0		0	0		0	0		0	0
	0	0		0	0		3	0		0	0		0	0		0	0
	1	0		0	0		0	0		0	0		1	0		0	0
	0	0		0	0		2	0		0	0		4	0		0	0
	2	0		0	0		4	0		1	0		0	0		0	0
	0	0		0	0		1	0		3	3		5	0		0	0
	0	0		0	0		4	0		0	0		0	0		1	0
	0	0		0	0		6	6		0	0		0	2		0	0
	0	0					0	0		0	0		2	0		2	1
	0	0		0	0		4	12		0	0		0	0		12	0
	0	0		0	0		0	146		0	0		0	0		5	0
	0	0		0	0		0	43		0	0		2	0		3	0
	0	0		0	0		13	2		0	0		0	0		9	2
	0	0		0	0		1	0		1	0		0	0		0	0
	0	0		0	0		4	0		0	0		1	0		0	0
	0	0		1	0		17	2		0	0		0	3		1	7
	0	0		0	0		1	0		0	0		6	0		0	0
	0	0		0	0		5	0		0	0		3	0		0	0
				0	0		4	0		0	0		3	6		0	0
	0	0		0	0		0	0		0	0		0	0		1	0
	0	0		0	0		0	0		0	0		0	4		0	0
	0	0		0	0		0	0		0	0		0	0		0	0
	0	0		1	0		11	2		0	0		0	3		0	0
	0	0		0	0		2	0		0	0		1	0		0	0
	0	0		0	0		6	1		0	0		0	0		1	0
	0	0		0	0					0	0		1	0		0	0
	0	0		0	0		0	0		0	0		1	0		1	2
	0	0		0	0		9	14		1	0		0	0		2	0
	0	0		0	0		12	27		0	0		0	0		0	0
	0	0		2	0		6	11		0	0		1	3
	0	0		1	0		5	27		0	0		1	1		3	0
	0	0		0	0		6	14		0	0		2	2		1	0
	0	0		0	0		4	2		0	0		0	1		0	0
	0	0		0	0		4	0		0	0					0	0
	0	0		0	0		9	1		2	0		2	0		1	0
	0	0		0	0		0	0		0	0		1	0		0	0
	0	0		0	0		3	0		0	0		1	0		2	1
	1	0		0	0		0	0		0	0		0	0		4	0
	1	0		0	0		2	0		0	0		0	0		0	0
	0	0		2	0		4	0		0	0		0	0		0	0
	0	0		0	0		1	0		0	0		0	0		4	0
	0	0		0	0		4	0					0	0		0	0
	0	0		0	0		6	6		0	0		0	0		0	3
	0	0		0	0		0	0		0	0		1	0		2	0
	1	0		1	0		4	12		0	0		0	0		0	0
	3	0		0	0		3	143		0	0		0	0		0	0
	0	0		0	0		5	38		0	0		7	3		0	0
	1	0		0	0		7	6		2	0		7	0		0	0
	0	0		0	0		1	0		3	0		0	0		0	0
	0	0		0	0		4	0		1	0		0	0		1	0
	0	0		0	0		6	11		1	0		2	0		0	0
	1	0		2	0		1	0		1	0		0	3		0	0
	0	0		1	0		5	0		2	0		0	0		0	0
	0	0		0	0		0	4		0	0		0	0		0	0
	0	0		0	0		0	0		2	0		6	3		3	0
	0	0		0	0		0	0		0	0		0	0		0	0
	0	0		1	0		0	0		1	0		4	0		0	0
	0	0		0	0		2	9		1	0		2	4		0	0
				1	0		2	0		0	0		3	0		0	0
	0	0		0	0		3	3		0	0		0	0		0	0
	0	0								1	0		0	0		0	0
	3	0		0	0		1	0		0	0		0	0		0	0
	2	0		0	0		5	0		0	0		3	0		0	0
	0	0		0	0		5	0		0	0		0	0		0	0
	3	0		0	0		6	0		0	0		0	0		0	0
	0	0		0	0		21	0		1	0		0	0		0	0
	0	0		0	0		10	20		1	2		3	0		0	0
	0	0		0	0		7	3		2	0		0	0		0	0
	3	0		0	0		8	7		0	0		0	0		0	0
	0	0		0	0		7	15		0	0					0	0
	0	0		0	0		6	0		1	0		0	0		0	0
	0	0		0	0		0	0		0	0		0	0		0	0
	0	0		1	0		0	0		2	7		0	3		0	0
	1	0		1	0		1	0		3	0		4	0		1	0
	6	0		0	0		1	0					0	0
	1	0		1	0		7	37		0	0		5	0		0	0
	1	0		0	0		9	3		2	0		0	0		0	0
	2	0		0	0		9	25		0	0		0	0		0	0
	8	0					5	6		1	0		0	0		0	0
	4	4		0	0		18	22		0	0		0	0		0	0
	1	0		0	0		7	49		0	0		0	0		0	0
	1	0		0	0		0	0		0	0		1	0		0	0
	0	0		0	0		0	0		0	0		0	0		0	0
	0	0		0	0		1	0		0	0		0	0		0	0
	1	0		0	0		0	0		0	0		0	0		0	0
	1	0		1	0		2	1		0	0		0	0		0	0
	1	0		0	0		7	39		0	0		0	0		0	0
				0	0		10	11		0	0		2	0		0	0
	0	0		0	0		0	4		0	0		0	0		0	0
	0	0		0	0		18	4		0	0		0	0		0	0
	0	0		0	0		5	0		0	0		0	0		0	0
	0	0		0	0		1	0		1	0		0	0		0	0
	1	0		0	0		13	6		11	5		0	0		2	0
	0	0		0	0		3	0		0	0		0	0		0	0
	1	0		0	0		1	0		1	3		0	0		0	0
	0	0		0	0		0	0		0	0		0	0		0	0
	1	0		0	0		0	0		0	0		0	0		0	0
	0	0		0	0		0	0		0	0		0	0		0	0
	0	0		0	0		0	0		1	0		0	0		0	0
	0	0		0	0		8	0		1	0		0	0		0	0
	0	0		0	0					0	0		1	0		0	0
	0	0		0	0		1	0		6	16		0	0		0	0
	0	0		0	0		0	0		0	0		1	0		1	0
	0	0		0	0		0	3		0	0		1	0		0	0
	0	0		0	0		2	0		0	0					0	0
	0	0		0	0		0	0		0	0		0	0		0	0
	0	0		0	0		1	0		0	0		0	0		0	0
	0	0		1	0		1	0		3	3		0	0		0	0
	0	0		0	0		0	0					0	0		0	0
	0	0		0	0		0	0		1	0		0	0		0	0
	0	0		3	0		0	0		3	0		0	0		0	0
	0	0		0	0		0	0		1	0		0	0
	0	0		0	0		1	0		0	0		0	0		0	0
	0	0		0	0		1	0		0	0		0	0		0	0
	0	0		0	0		0	0		1	0		0	0		0	0
	0	0		0	0		3	0		0	0		0	0		0	0
	0	0		0	0		0	0		2	0		0	0		0	0
	0	0		0	0		1	0		2	0		0	0		1	0
				0	0		0	0		0	0		0	0		0	0
	0	0		0	0		1	0		0	0		0	0		0	0
	2	3		0	0		0	0		0	0		0	0		0	0
	0	0		0	0		0	0		0	0		0	0		1	0
	0	0		0	0		0	0		0	0		0	0		0	0
	0	0		0	0		0	0		0	0		0	0		0	0
	0	0					0	0		0	0		0	0		0	0
	4	0		0	0		0	0		0	0		0	0		0	0
	0	0		0	0		1	0		0	0		0	0		0	0
	3	0		0	0		0	0		0	0		0	0		0	0
	4	0		0	0		0	0		4	0		0	0		0	0
	3	0		0	0		0	0		0	0		0	0		0	0
	0	0		0	0		3	0		0	0		0	0
	0	0		0	0		0	0		3	0		0	0		0	0
	1	0		0	0		0	0		1	0		0	0		0	0
	3	1		0	0		0	0		0	0		1	0		0	0
	1	1		1	0		1	0		1	0		0	0		0	0
	7	14		0	0		4	0		1	0		0	0		0	0
	1	3		0	0		0	0					0	0		0	0
	5	0		0	0		5	0		0	0		1	0		0	0
	7	0		0	0		0	0		0	0		0	0		0	0
	1	0		0	0		2	0		1	0		1	0		0	0
	3	0		0	0		4	0		0	0		0	0		0	0
	1	0		0	0		0	0		0	0		0	0		0	0
	10	0		0	0		1	0		1	0		0	0		0	0
	8	0		0	0		1	0		0	0		0	0		0	0
	0	0		1	0		0	0		0	0		0	0		0	0
	0	0		0	0		2	0		1	0		0	0		0	0
	4	0		0	0					0	0					1	0
	5	0		0	0		0	0		0	0		0	0		0	0
	5	2		0	0		2	0		0	0		0	0		0	0
	9	0		0	0		1	0		0	0		0	0		0	0
	6	3		0	0		2	0		0	0		0	0		0	0
	4	0		0	0		0	0		2	0		0	0		0	0
	14	0		0	0		4	0		0	0		0	0		0	0
	6	0		1	0		1	0		0	0		0	0		0	0
	0	0		0	0		0	0		0	0		0	0		1	0
	0	0		1	0		4	0		0	0		0	0		7	3
	3	0		1	0		0	0		0	0		0	0		0	0
	0	0		0	0		3	0		0	0		0	0		0	0
	2	0		0	0		0	0		0	0		0	0		0	0
				0	0		1	0		0	0		1	0		0	0
	1	0		0	0		3	0		0	0		1	0		0	0
	0	0		0	0		4	0		0	0		0	0		0	0
	0	0		0	0		0	0		0	0		0	0		0	0
	1	0		0	0		0	0		1	0		0	0		0	0
	2	0		3	0		0	0		1	0		0	0
	1	0		1	0		1	0		4	0		0	0		0	0
	0	0		0	0		3	0					0	0		0	0
	0	0		2	0		6	0		2	0		0	0		0	0
	0	0		0	0		3	0		0	0		0	0		0	0
	3	0		0	0		0	0		0	0		0	0		0	0
	0	3		0	0					0	0		1	0		0	0
	1	0					2	0		0	0		1	0		0	0
	0	0		0	0		0	0		1	0		1	0		0	0
	1	0		4	0		6	17		0	0		0	0		0	0
	0	0		0	0		9	52		3	0		0	0		0	0
	6	0		0	0		3	6		5	0		0	0		0	0
	2	0		1	0		0	1		1	0		1	0		0	0
	4	0		5	0		1	0		2	0		0	0		0	0
	1	0		0	0		0	0		0	3		0	0		0	0
	0	0		7	3		3	0		0	0		0	0		0	0
	0	0		2	0		0	0		0	0		0	0		0	0
	0	0		6	0		2	1		0	0		0	0		0	0
	0	0		7	0		1	0		0	0		0	0		0	0
	3	0		0	0		6	39		1	0		0	0		1	0
	7	6		0	0		2	14		0	0		0	0		0	0
	5	3		0	1		0	0		0	0		0	0		0	0
	3	3		1	0		0	0		2	6					0	0
	1	0		0	0		3	2		2	0		1	0		0	0
	5	0		6	1		0	0		1	0		0	0		0	0
	3	0		0	0		0	0		0	0		1	0		0	0
	0	0		0	0		0	0		0	0		0	0		0	0
	0	0		0	0		2	0		1	0		0	0		0	0
	1	0		0	0		0	7		1	0		0	0		0	0
	0	0		0	0		0	0		0	0		0	0		0	0
	1	0		0	0		3	0		0	0		0	0		0	0
	0	0		1	0		3	0		3	7		0	0		0	0
				0	0		0	0		0	0		0	0
	2	0		2	0		0	0		3	0		0	0		0	0
	0	2		0	0		2	13		0	0		0	0		0	0
	4	1		0	0		1	0		2	0		0	0		0	0
	0	0		0	0		0	0		1	0		2	0		0	0
	0	0		0	0		0	0		1	0		0	0		0	0
	0	0		0	0		1	2					0	0		0	0
	5	11		0	0		1	1		0	0		0	0		0	0
	0	0		1	0		0	0		0	0		3	0		0	0
	0	0		1	0		3	12		0	0		1	0		0	0
	0	0		0	0		6	22		0	0		0	0		1	4
	12	3		1	0		4	38		0	0		0	0		0	0
	0	0		0	0		2	19		0	0		0	0		0	0
	0	0		0	0		0	0		0	0		0	0		0	0
	0	0		0	0		0	0		0	0		0	0		0	0
	1	0		1	1		0	0		0	0		0	0		0	0
	0	0		0	0		0	3		0	0		0	0		0	0
				1	0		0	0		0	0		0	0		0	0
	2	0								0	0		1	0		0	0
	0	0		0	0		0	0		0	0		0	0		0	0
	0	0		0	0		0	0		0	0		0	0		0	0
	0	0		0	0		0	0		0	0		0	0		0	0
	2	3		0	0		0	0		0	0		1	0		0	0
	2	0		0	0		2	3		0	0		0	0		0	0
	0	0		0	0		11	0		0	0		0	0		0	0
	0	0		0	0		3	8		0	0					0	0
	2	0		0	0		0	5		0	0		2	0		0	0
	5	0		0	0		0	0		0	0		2	0		0	0
	4	0		1	0		5	6		0	0		0	0		0	0
	3	7		0	0		4	6		0	0		0	0		0	0
	2	2		0	0		0	0		0	0		0	0		0	0
	0	3		0	0		8	19		0	0		0	0		0	0
	0	0		0	0		2	0		0	0		0	0		0	0
	0	0		0	0		8	2		0	0		0	0		0	0
	0	0		0	0		1	0		0	0		0	0		0	0
	1	4		0	0		1	0		0	0		0	0		0	0
	4	0		0	0		1	5		0	0		0	0		0	0
	0	0		0	0		3	0		0	0		0	0		0	0
	4	5		0	0		0	0		0	0		0	0
	1	0		0	0		4	2		1	0		0	0		0	0
	3	0		0	0		5	4		0	0		1	0		0	0
	1	0		0	0		0	0		0	0		0	0		0	0
	12	16		0	0		2	0		0	0		0	0		0	0
	0	0		0	0		4	4		0	0		0	0		0	0
	0	0		0	0		5	3		0	0		0	0		0	0
	1	0		0	0		6	8		0	0		0	0		0	0
	0	0		0	0		0	0		0	0		0	0		0	0
	0	0		1	0		4	7		0	0		1	0		0	0
	0	0		0	0		6	7		0	0		0	0		0	0
				0	0		10	13		0	0		1	0		0	0
	0	4		0	0		0	0		1	0		0	0		0	0
	4	0		0	0		0	0					0	0		0	0
	1	0		0	0					0	0		3	0		0	0
	0	0		0	0		2	0		0	0		0	0		1	0
	0	0		2	0		5	0		0	0		0	0		0	0
	3	0		1	5		0	0		0	0		0	0		2	0
	0	0		2	0		0	0		0	0		0	0		0	0
	3	0		0	0		0	0		0	0		0	0		0	0
	2	0		0	0		1	0		0	0		0	0		0	0
	0	0		0	0		9	22		0	0		0	0		0	0
	8	8		0	0		2	3		0	0		0	0		0	0
	1	0		0	0		0	0		0	0		0	0		0	0
	0	8		0	0		1	0		0	0		1	0		0	0
	6	20					0	0		0	0					0	0
	4	4		0	0		2	0		0	0		0	0		0	0
	2	2		0	0		0	0		0	0		0	0
	0	0		0	0		0	0		1	0		0	0		0	0
	3	0		0	0		2	0		0	0		1	0		2	0
	1	0		0	0		0	100		0	0		0	0		0	0
	0	0		1	0		4	0		0	0		0	0		0	0
	1	16		0	0		3	6		0	0		0	0		0	0
	0	0		0	0		2	5		0	0		0	0		4	0
	1	0		0	0		1	0		0	0		0	0		4	0
	0	0		0	0		3	2		0	0		0	0		0	0
	0	0		0	0		0	2		0	0		0	0		0	0
	0	0		1	0		9	1		0	0		1	0		1	0
	0	0		0	0		0	0		0	0		0	0		0	0
	0	0		3	0		0	0		0	0		0	0		0	0
	0	0		0	0		3	0		0	0		0	0		0	0
	0	0		0	0		0	0		1	0		0	0		0	0
	0	0		0	0		3	6		0	0		0	0		0	0
	0	0		0	0		1	0		0	0		0	0		0	0
	2	0		0	0		4	0		0	0		0	0		0	0
	1	0		0	0		1	0		0	0		0	0		0	0
	0	0		0	0		2	0		0	0		0	0		1	0
	0	0		0	0		3	0		0	0		0	0		0	0
	8	21		2	4		4	100					0	0
	4	5		0	0		3	34		0	0		0	0
	7	10		0	0		3	60		0	0		0	0
				0	0		7	26		0	0		0	0
	0	0		2	0		3	41		0	0		0	0
	2	0		0	0		2	9		0	0		0	0
	1	0		0	0		0	0		0	0		0	0
	1	0		1	0					0	0		0	0
	0	0		0	0		0	0		0	0		0	0
	0	0		0	0		13	0		0	0		0	0
	3	0					0	0		1	0		2	0
	0	0		0	0		1	0		0	0		0	0
	0	0		1	0		2	0		0	0		0	0
	1	0		3	0		2	0		0	0		0	0
	7	6		0	0		2	0		0	0		0	0
	0	0		0	0		4	0		0	0		0	0
	2	0		2	0		3	0		0	0
	0	0		0	0		16	15		0	0		0	0
	0	0		0	0		2	0		0	0		2	0
	0	0		0	0		3	0		0	0		1	0
	0	0		0	0		2	0		0	0		0	0
	0	0		0	0		6	3		0	0		0	0
	0	0		4	0		7	3		0	0		0	0
	0	0		0	0		5	5		0	0		0	0
	3	20		1	0		3	0		0	0		2	0
	1	0		0	0		8	4		0	0		3	0
	0	0		1	0		6	41		0	0		0	0
	0	0		0	0		6	5		1	0		0	0
	0	0		0	0		3	4		0	0		1	0
	0	0		8	0		7	0		0	0		1	0
	0	0		0	0		7	0		0	0		3	0
	0	0		2	0		6	3		0	0		1	0
				0	0		1	0		0	0		0	0
	1	0		2	0		3	0		0	0		2	0
	0	0		0	0		3	3					0	0
	0	0		0	0		1	3		0	0
	0	0		4	0		1	3		0	0		0	0
	0	0		0	0		1	0		3	0		1	0
	0	0		0	0		7	0		0	0		1	0
	0	0		0	0		4	0		0	0		0	0
	0	0		0	0		2	0		0	0		0	0
	0	0		3	0		5	0		0	0		0	0
	0	0		0	0					0	0		0	0
	0	0		0	0		2	0		0	0		0	0
	0	0					2	0		0	0		0	0
	0	0		0	0		0	0		0	0		0	0
	0	0		0	0		7	3		0	0		0	0
	0	0		0	0		1	0		1	0		0	0
	0	0		0	0		3	3		0	0		0	0
	0	0		0	0		5	0		3	0		0	0
	9	0		0	0		0	0		0	0		0	0
	5	0		0	0		0	0		0	0		1	0
	0	0		0	0		0	0		1	0		0	0
	0	0		0	0		2	0		1	0		0	0
	0	0		0	0		0	0		0	0		0	0
	0	0		0	0		9	28		2	0		1	0
	0	0		0	0		0	0		0	0		0	0
	3	0		0	0		0	3		0	0		0	0
	2	0		0	0		6	10		0	0		0	0
	0	0		1	0		2	0		1	0		0	0
	0	0		0	0		1	0		0	0
	0	0		2	3		2	0		1	0		0	0
	0	0		0	0		0	0		0	0		0	0
	0	0		0	0		0	0		0	0		0	72
	0	0		0	0		0	0		1	0		0	4
				4	0		0	0		1	0		0	0
	0	0		2	0		2	0		0	0		1	0
	0	0		0	0		5	4		0	0		1	0
	0	0		0	0		1	0		0	0		0	0
	1	3		0	0		0	0		0	0		0	0
	5	6		0	0		0	0		0	0		7	42
	2	0		0	0		0	0		1	0		6	3
	6	0		0	0		0	0		0	0		0	0
	3	36		0	0		0	0		0	0		0	0
	0	0		0	0		3	0					1	0
	8	0		0	0					0	0		0	0
	4	0		0	0		0	0		0	0		0	0
	6	3		0	0		0	0		0	0		0	0
	7	5		0	0		5	0		0	0		0	0
	5	31		3	0		3	0		0	0		0	0
	2	0		1	3		1	0		1	0
	1	7		0	0		0	0		0	0
	1	3		0	0		4	0		0	0
	5	0		0	0		0	0		0	0
	6	10		0	0		0	0		0	0
	0	0		0	0		1	0		0	0
	4	0					0	0		0	0
	6	1					1	0		2	0
	1	3					0	0		2	0
	3	5					1	0		0	0
	2	0					2	0		0	0
	0	0					1	0		0	0
	3	0					0	0		0	0
	1	0					0	0		0	0
	0	0					1	0		0	0
	1	0					5	0		0	0
	0	0					3	14		1	0
	0	0					2	0		0	0
	0	0					0	0		0	0
	0	2					0	0		0	0
	3	0					0	0		0	0
	0	0					2	0		3	3
	0	0					1	0		0	0
	0	0					3	0		3	0
	1	1					0	0		4	5
	7	1								3	3
							0	0		3	0
	0	0					4	0		0	0
	0	0					6	0		2	6
	0	0					2	0		0	0
	0	0					1	0		0	0
	0	0					0	3		0	0
	0	0					0	0		0	0
	0	0					1	0
	0	0					1	0		0	0
	0	0					4	0		0	0
	0	0					1	0		0	0
	0	0					0	0		0	0
	2	0					3	0		0	0
	0	0					5	0		0	0
	0	0					6	4		0	0
	0	0					3	3		0	0
	0	0					2	0		0	0
	0	0					5	1		0	0
	0	0					10	0		0	0
	0	0					2	0		0	0
	0	0					2	0		0	0
	0	0					5	0		0	0
	1	0					0	0		1	0
	1	0					2	0		0	0
	0	0					2	0		0	0
	0	0					0	0		1	0
	0	0					0	0		0	0
	0	0					0	0		0	0
	0	0					1	0
	0	0					1	0
	0	0					1	0
	0	0					2	0
	2	0					7	0
	2	0					0	0
	0	0					4	0
	0	0					1	0
	0	0					0	0
	0	0					0	0
	0	0					0	0
							0	0
							0	0
							2	0
							4	0
							0	0
							0	0
							0	0
							1	0
