# Supplementary material for: Microtubules regulate pancreatic β-cell heterogeneity via spatiotemporal control of insulin secretion hot spots
Source: eLife. 2021 Nov 16;10:e59912. doi: 10.7554/eLife.59912 (PMC8635970; doi:10.7554/eLife.59912)
Supplement: Figure 5—source data 1. [file elife-59912-fig5-data1.xlsx]

## Sheet: Figure 5A
Ctrl Low	Ctrl High	Noc Low	Noc High	Taxol Low	Taxol High		Events/Cluster	Ctrl Low	Ctrl High	Noc Low	Noc High	Taxol Low	Taxol High		Statistical significance calculated using Kruskal-Wallis test of each condition compared to every other condition
8	36	21	168	8	29		3	36.8421	41.5094	55	33.1034	42.8571	50		Number of families	1
7	35	8	146	6	26		4	31.5789	18.8679	20	18.9655	35.7143	6.25		Number of comparisons per family	15
5	30	7	115	5	13		5	21.0526	7.54717	5	10.3448	7.14286	12.5		Alpha	0.05
5	26	6	90	4	10		6	0	5.66038	5	7.24138	7.14286	9.375
5	25	5	62	4	10		7	0	6.60377	5	5.86207	0	6.25		Dunn's multiple comparisons test	Mean rank diff.	Significant?	Summary	Adjusted P Value
5	13	4	61	4	7		8	0	4.71698	5	3.7931	0	0		Ctrl Low vs. Ctrl High	-22.9	No	ns	>0.9999	A-B
4	13	4	55	4	7		>8	10.5263	15.0943	5	20.6897	7.14286	15.625		Ctrl Low vs. Noc Low	19.81	No	ns	>0.9999	A-C
4	12	4	53	4	6										Ctrl Low vs. Noc High	-48.55	No	ns	>0.9999	A-D
4	11	4	48	3	6										Ctrl Low vs. Taxol Low	14.36	No	ns	>0.9999	A-E
4	11	3	47	3	6										Ctrl Low vs. Taxol High	-12.3	No	ns	>0.9999	A-F
4	10	3	41	3	5										Ctrl High vs. Noc Low	42.71	No	ns	>0.9999	B-C
4	10	3	37	3	5										Ctrl High vs. Noc High	-25.64	No	ns	>0.9999	B-D
3	10	3	37	3	5										Ctrl High vs. Taxol Low	37.26	No	ns	>0.9999	B-E
3	10	3	32	3	5										Ctrl High vs. Taxol High	10.6	No	ns	>0.9999	B-F
3	10	3	32		4										Noc Low vs. Noc High	-68.35	No	ns	0.4224	C-D
3	9	3	29		4										Noc Low vs. Taxol Low	-5.45	No	ns	>0.9999	C-E
3	8	3	28		3										Noc Low vs. Taxol High	-32.11	No	ns	>0.9999	C-F
3	8	3	27		3										Noc High vs. Taxol Low	62.9	No	ns	>0.9999	D-E
3	8	3	23		3										Noc High vs. Taxol High	36.25	No	ns	>0.9999	D-F
	8	3	20		3										Taxol Low vs. Taxol High	-26.66	No	ns	>0.9999	E-F
	8		19		3
	7		18		3										Test details	Mean rank 1	Mean rank 2	Mean rank diff.	n1	n2	Z
	7		18		3										Ctrl Low vs. Ctrl High	207.1	230	-22.9	19	106	0.6826
	7		17		3										Ctrl Low vs. Noc Low	207.1	187.3	19.81	19	20	0.459
	7		17		3										Ctrl Low vs. Noc High	207.1	255.7	-48.55	19	290	1.522
	7		16		3										Ctrl Low vs. Taxol Low	207.1	192.8	14.36	19	14	0.3026
	7		16		3										Ctrl Low vs. Taxol High	207.1	219.4	-12.3	19	32	0.3153
	7		15		3										Ctrl High vs. Noc Low	230	187.3	42.71	106	20	1.301
	6		15		3										Ctrl High vs. Noc High	230	255.7	-25.64	106	290	1.677
	6		15		3										Ctrl High vs. Taxol Low	230	192.8	37.26	106	14	0.9728
	6		15		3										Ctrl High vs. Taxol High	230	219.4	10.6	106	32	0.3903
	6		15		3										Noc Low vs. Noc High	187.3	255.7	-68.35	20	290	2.195
	6		13												Noc Low vs. Taxol Low	187.3	192.8	-5.45	20	14	0.1161
	6		13												Noc Low vs. Taxol High	187.3	219.4	-32.11	20	32	0.8363
	5		13												Noc High vs. Taxol Low	255.7	192.8	62.9	290	14	1.707
	5		12												Noc High vs. Taxol High	255.7	219.4	36.25	290	32	1.445
	5		12												Taxol Low vs. Taxol High	192.8	219.4	-26.66	14	32	0.6176
	5		12
	5		12
	5		11
	5		11
	5		11
	4		11
	4		11
	4		10
	4		10
	4		10
	4		10
	4		10
	4		10
	4		10
	4		10
	4		9
	4		9
	4		9
	4		9
	4		9
	4		9
	4		9
	4		9
	4		8
	4		8
	3		8
	3		8
	3		8
	3		8
	3		8
	3		8
	3		8
	3		8
	3		8
	3		7
	3		7
	3		7
	3		7
	3		7
	3		7
	3		7
	3		7
	3		7
	3		7
	3		7
	3		7
	3		7
	3		7
	3		7
	3		7
	3		7
	3		6
	3		6
	3		6
	3		6
	3		6
	3		6
	3		6
	3		6
	3		6
	3		6
	3		6
	3		6
	3		6
	3		6
	3		6
	3		6
	3		6
	3		6
			6
			6
			6
			5
			5
			5
			5
			5
			5
			5
			5
			5
			5
			5
			5
			5
			5
			5
			5
			5
			5
			5
			5
			5
			5
			5
			5
			5
			5
			5
			5
			5
			5
			4
			4
			4
			4
			4
			4
			4
			4
			4
			4
			4
			4
			4
			4
			4
			4
			4
			4
			4
			4
			4
			4
			4
			4
			4
			4
			4
			4
			4
			4
			4
			4
			4
			4
			4
			4
			4
			4
			4
			4
			4
			4
			4
			4
			4
			4
			4
			4
			4
			4
			4
			4
			4
			4
			4
			3
			3
			3
			3
			3
			3
			3
			3
			3
			3
			3
			3
			3
			3
			3
			3
			3
			3
			3
			3
			3
			3
			3
			3
			3
			3
			3
			3
			3
			3
			3
			3
			3
			3
			3
			3
			3
			3
			3
			3
			3
			3
			3
			3
			3
			3
			3
			3
			3
			3
			3
			3
			3
			3
			3
			3
			3
			3
			3
			3
			3
			3
			3
			3
			3
			3
			3
			3
			3
			3
			3
			3
			3
			3
			3
			3
			3
			3
			3
			3
			3
			3
			3
			3
			3
			3
			3
			3
			3
			3
			3
			3
			3
			3
			3
			3
