# Supplementary material for: Microtubules regulate pancreatic β-cell heterogeneity via spatiotemporal control of insulin secretion hot spots
Source: eLife. 2021 Nov 16;10:e59912. doi: 10.7554/eLife.59912 (PMC8635970; doi:10.7554/eLife.59912)
Supplement: Figure 6—source data 1. — Each data set is a separate sheet. [file elife-59912-fig6-data1.xlsx]

## Sheet: Figure 6A
Control Low	Control High	Noc Low	Noc High	Taxol Low	Taxol High		Time (s)	Control Low	Control High	Noc Low	Noc High	Taxol Low	Taxol High
518.05	520	519.025	520	514.15	519.35		0-30	2.8436	3.85109	7.06522	3.05308	2.59259	6.82261
518.05	520	518.05	520	509.275	518.375		30-60	8.05687	7.83055	5.43478	5.33114	4.07407	7.79727
517.725	519.675	516.1	519.35	507.65	517.725		60-90	5.6872	9.94865	6.25	7.60921	6.66667	7.01754
517.075	518.7	508.95	519.35	507.325	517.4		90-120	7.81991	10.7189	3.26087	6.12964	5.92593	4.67836
516.1	518.375	502.45	518.7	505.375	517.4		120-150	4.73934	9.05006	7.6087	6.36449	4.81481	4.2885
515.775	518.375	502.45	518.05	502.125	517.075		150-180	6.3981	8.60077	7.88043	8.24331	5.92593	3.89864
514.8	517.725	501.15	518.05	501.475	516.75		180-210	7.34597	6.61104	6.25	8.61907	4.07407	5.45809
514.8	516.75	500.175	517.725	501.15	514.8		210-240	6.16114	6.03338	3.80435	7.58572	5.18519	3.50877
511.55	516.75	499.85	517.4	499.525	514.475		240-270	4.2654	4.36457	5.70652	7.44481	6.66667	3.50877
510.9	513.825	494	517.4	497.9	513.825		270-300	4.02844	4.04365	7.88043	6.76374	4.44444	4.09357
510.9	513.175	493.675	517.075	497.9	513.825		300-330	2.36967	3.85109	6.79348	5.77736	8.14815	7.40741
509.6	512.85	493.35	517.075	497.575	513.825		330-360	4.9763	3.53017	7.33696	4.95538	5.18519	6.23782
509.6	511.875	492.375	516.75	496.925	512.85		360-390	7.81991	3.08087	5.16304	4.48567	6.66667	5.65302
503.425	510.575	492.05	516.425	492.7	512.2		390-420	4.73934	4.30039	3.26087	4.81447	7.40741	5.45809
502.125	510.25	484.9	516.425	490.1	511.875		420-450	4.50237	4.87805	5.70652	3.87506	7.40741	7.60234
500.175	509.6	483.925	516.1	486.525	510.25		450-480	9.00474	4.42875	5.97826	3.82809	7.40741	5.45809
500.175	508.3	480.35	516.1	485.225	510.25		480-510	6.63507	3.91528	3.80435	3.99248	7.03704	7.79727
497.9	507.975	478.075	516.1	481.325	509.275		510-520	2.60664	0.962773	0.815217	1.12729	0.37037	3.31384
497.9	507.325	476.125	515.775	480.35	508.625
496.925	507	475.8	515.45	480.025	507.975
496.275	505.05	474.825	515.125	479.7	507.65
496.275	504.725	472.875	515.125	479.375	506.35
495.95	504.725	472.875	514.475	477.1	506.025
494.65	504.4	472.55	513.825	474.5	505.05
492.05	504.4	469.95	513.825	472.875	504.725
490.1	504.4	469.625	513.825	471.9	504.4
488.475	503.75	468.65	513.825	468.975	503.75
488.15	503.75	465.725	513.5	468.65	503.75
488.15	503.425	465.075	513.175	467.675	502.45
486.525	503.1	464.1	512.85	466.7	501.8
486.2	500.175	463.45	512.85	464.1	501.15
485.875	498.875	458.575	512.525	463.125	500.175
485.225	498.55	458.575	512.525	460.85	499.2
484.9	498.225	453.7	512.525	460.525	498.55
484.575	496.275	453.7	512.525	455.65	495.625
484.25	494.65	452.4	512.2	453.375	494
483.6	494.325	451.425	512.2	453.375	493.675
482.625	494	450.775	512.2	452.725	493.675
480.35	493.675	450.45	511.875	451.1	493.025
479.7	492.7	449.15	511.875	450.775	492.7
478.4	492.375	448.5	511.225	448.825	491.4
478.4	492.05	447.525	511.225	448.5	490.1
478.4	492.05	446.875	510.9	447.2	490.1
476.125	491.725	441.35	510.575	445.575	489.45
475.8	491.725	440.05	510.575	444.275	489.125
473.2	491.4	434.525	510.575	443.3	488.8
472.875	490.75	434.525	510.575	441.025	487.825
472.55	490.425	432.9	510.575	440.375	485.55
471.9	490.1	432.575	509.925	437.775	484.9
470.275	489.775	429	509.925	435.175	484.9
470.275	488.475	428.675	509.6	434.2	483.925
470.275	488.475	427.7	509.6	429.975	483.275
469.3	488.15	427.05	509.275	428.35	483.275
469.3	487.825	425.75	508.95	427.7	482.3
468	487.825	425.1	508.95	427.375	481
468	487.825	425.1	508.3	425.425	480.025
468	487.5	423.8	507.975	425.1	480.025
467.025	487.5	423.8	507.975	423.8	475.15
467.025	487.175	421.2	507.975	423.15	474.825
466.05	487.175	421.2	507.65	421.2	474.825
465.725	486.85	419.9	507.325	419.25	473.2
465.725	486.85	419.575	507.325	416.325	470.925
463.775	486.2	409.825	507.325	415.025	470.925
463.125	485.875	407.875	507.325	412.75	470.6
463.125	485.875	404.625	507	412.425	470.275
462.15	485.875	404.3	507	412.425	469.95
461.825	485.875	403.975	506.675	412.425	469.3
460.2	485.55	399.425	506.35	411.775	468
456.95	485.55	398.45	506.35	411.125	467.025
455	485.225	392.275	506.35	409.175	466.7
455	484.575	390	506.025	408.85	463.45
454.675	484.25	390	506.025	408.525	462.475
454.35	482.625	384.15	505.375	408.525	462.15
454.025	482.3	382.85	505.375	404.3	461.5
453.05	482.3	381.875	505.375	403.65	460.2
452.075	480.675	380.9	505.375	403	458.9
451.1	479.7	380.9	505.05	403	455.65
449.475	478.725	377.325	505.05	398.125	454.35
445.575	478.725	376.35	504.725	393.9	453.7
444.275	478.725	373.425	504.725	390	453.7
443.95	478.075	372.45	504.725	389.675	452.075
442.65	478.075	369.2	504.725	387.725	451.75
440.7	477.1	368.875	504.4	385.125	451.425
440.7	477.1	368.225	504.075	383.5	451.425
440.05	477.1	367.575	504.075	382.525	451.1
438.1	477.1	366.925	503.425	382.525	448.825
436.475	476.45	365.95	503.1	380.25	447.525
433.225	475.8	365.3	503.1	379.925	446.55
429.975	474.5	364.65	503.1	379.925	446.55
429.325	472.875	362.05	502.45	379.6	446.55
428.35	472.875	361.075	502.45	377.975	445.575
426.725	472.225	359.775	502.125	372.125	445.25
425.75	472.225	359.775	502.125	369.2	444.925
424.45	471.9	358.8	501.8	368.225	442.975
420.875	471.9	358.8	501.8	366.925	442.975
420.55	471.25	357.825	501.8	363.675	442.975
419.9	470.925	356.85	501.475	363.025	442
416.325	470.6	355.875	501.475	362.7	439.075
416.325	469.625	355.55	501.15	359.775	438.75
414.7	468.975	355.55	501.15	357.825	438.75
413.4	468.975	353.275	501.15	354.9	438.1
412.75	468.65	350.675	500.825	349.7	437.45
412.75	468.325	350.675	500.825	348.4	436.475
409.175	468	348.075	500.825	347.1	435.825
408.85	466.7	348.075	500.825	344.175	435.825
408.525	466.05	347.75	500.825	343.525	435.825
407.225	465.725	346.125	500.5	341.9	434.2
405.6	465.4	345.475	500.5	341.25	434.2
404.95	465.4	343.525	500.5	338.975	433.55
402.35	465.075	343.2	500.5	334.1	432.25
402.35	464.75	342.55	500.5	333.775	432.25
396.175	464.75	340.6	499.85	332.475	430.95
394.55	464.425	340.6	499.85	329.55	429.975
393.9	464.1	334.425	499.85	329.225	429.975
393.575	464.1	333.775	498.875	328.575	429.325
390	464.1	332.8	498.55	328.575	427.05
389.35	463.775	332.475	498.225	327.6	426.725
389.025	463.45	332.15	498.225	325.325	425.1
388.7	463.45	328.575	497.9	323.375	424.775
388.375	463.125	327.925	497.9	322.725	424.125
388.05	462.8	326.3	497.9	322.075	422.825
387.075	462.475	326.3	497.9	321.75	421.525
386.75	461.5	326.3	497.575	321.75	420.55
386.425	460.2	325	497.575	320.45	420.225
383.5	460.2	324.35	497.575	318.175	419.25
383.175	459.875	323.05	497.25	316.875	418.925
381.875	459.225	320.45	496.6	310.7	416.975
381.55	458.9	317.525	496.275	310.375	415.35
381.225	458.25	317.525	496.275	310.05	415.35
380.9	458.25	314.925	496.275	306.475	414.7
377.65	458.25	314.275	496.275	305.5	413.725
374.4	455.65	311.025	495.95	303.55	411.775
374.075	455.65	310.7	495.95	303.225	410.8
373.1	455.325	310.375	495.95	301.925	409.5
372.125	455	308.75	495.625	294.775	409.5
371.8	454.025	308.1	495.625	291.2	409.175
371.15	453.05	306.8	495.625	290.55	408.2
371.15	452.725	305.825	494.975	290.55	406.575
370.175	451.75	304.85	494.975	284.7	404.95
369.2	451.425	302.575	494.975	284.375	404.95
368.875	451.1	302.25	494.65	283.4	403.975
365.3	450.125	300.95	494.65	282.75	403.975
364	450.125	300.95	494.65	281.125	401.7
363.35	450.125	299.325	494	274.625	400.4
362.05	450.125	298.025	493.675	273	399.75
361.725	449.8	296.725	493.35	270.4	395.85
361.075	449.15	295.425	493.025	269.425	394.875
360.1	448.5	293.475	493.025	266.825	394.55
360.1	448.5	291.85	493.025	266.175	391.625
358.475	448.5	291.2	492.7	264.225	390.65
358.475	448.175	290.875	492.7	263.575	390.65
357.5	448.175	290.55	492.375	261.95	390
356.85	447.525	290.55	492.375	260.325	387.725
356.2	447.2	289.9	492.05	257.725	387.075
352.3	446.225	288.275	492.05	254.8	384.8
351.65	445.25	287.95	492.05	254.15	384.475
347.425	444.6	287.625	491.4	253.825	384.15
343.85	443.3	286.65	491.4	252.85	383.175
343.525	442.975	286.325	491.4	251.225	379.6
340.6	442.975	284.05	491.4	249.925	379.275
340.275	442.975	283.4	491.4	248.95	377.65
339.95	442.65	283.4	491.4	244.075	377.325
339.625	441.025	283.075	491.075	243.425	377
339.3	440.05	282.425	490.75	242.125	375.05
338.325	439.725	282.1	490.75	239.2	375.05
336.7	439.4	281.775	490.75	234.975	374.075
336.375	439.075	280.15	490.1	234	372.775
335.4	438.75	280.15	490.1	233.35	371.15
332.8	438.75	274.625	489.775	232.7	370.5
331.825	438.75	274.625	489.775	229.125	369.2
329.875	438.425	271.05	489.775	228.475	368.875
329.55	438.425	270.075	489.45	219.375	366.925
326.625	438.1	268.775	489.125	218.075	365.625
325.975	437.775	266.5	488.475	216.125	365.625
325	437.775	263.25	488.15	214.175	365.3
322.725	437.775	261.625	487.825	213.525	364.975
315.575	437.45	260.65	487.825	213.2	364.975
312	436.475	259.675	487.825	211.25	364.325
307.775	436.475	258.7	487.175	207.35	363.675
306.8	435.825	258.05	487.175	206.05	362.05
299.975	435.825	257.075	486.525	206.05	360.1
297.375	435.5	256.75	486.525	204.425	358.8
296.075	435.175	255.45	486.2	202.15	358.15
294.125	434.525	255.45	486.2	201.175	354.25
292.175	433.55	253.825	486.2	199.875	353.275
290.55	433.225	250.9	485.875	197.925	352.3
287.3	432.9	250.25	485.875	190.775	352.3
286.975	432.9	250.25	485.875	190.45	352.3
286.65	431.925	250.25	485.875	184.275	351
286	431.275	246.675	485.55	175.175	350.025
286	431.275	243.1	485.55	174.525	349.375
285.675	431.275	242.125	485.55	170.625	348.725
285.025	430.3	240.5	485.55	167.375	348.725
277.875	430.3	239.2	484.25	164.775	348.725
277.225	430.3	238.875	483.925	162.5	346.45
275.925	430.3	236.925	483.6	162.175	345.8
274.625	429.65	236.6	483.275	160.875	344.5
269.1	429.325	236.275	483.275	160.875	344.175
267.8	429	235.3	483.275	158.925	342.225
267.475	428.675	234.975	482.95	157.95	340.6
262.6	427.7	234.325	482.95	156.65	339.625
262.6	427.375	224.9	482.625	155.675	339.3
261.3	427.375	222.3	482.3	154.375	338.65
258.05	427.375	220.35	482.3	151.125	338.325
257.725	426.4	219.7	482.3	150.8	338.325
254.475	426.4	215.15	481.975	149.5	336.7
251.55	426.4	213.2	481.975	148.85	335.4
251.55	426.4	209.95	481.975	147.55	334.75
250.25	425.425	209.3	481.325	146.575	334.75
247.975	425.1	208.325	481	145.275	333.125
247.65	424.775	208	481	142.675	332.15
245.05	424.45	206.375	480.675	142.025	331.175
244.4	423.8	205.725	480.675	139.425	330.2
241.8	422.825	205.075	480.675	135.85	329.55
240.175	422.5	204.75	480.35	135.85	328.9
239.2	421.2	203.775	480.35	131.625	328.575
238.875	420.875	203.125	480.025	130.325	327.275
238.225	420.55	203.125	480.025	125.775	327.275
238.225	420.55	201.5	479.7	116.675	326.3
234.975	420.225	200.2	479.375	116.025	325.975
230.1	420.225	197.275	479.375	115.05	325.65
229.775	419.9	195	479.05	114.075	324.675
229.45	419.9	191.75	479.05	112.125	324.35
226.525	419.575	190.775	478.725	109.85	323.375
224.25	418.925	186.875	478.725	109.2	321.1
222.95	418.6	186.55	478.4	107.575	318.825
221.65	417.625	186.55	478.075	103.675	318.825
220.675	417.3	184.925	477.75	101.4	318.175
217.1	417.3	184.6	477.75	100.75	315.9
216.125	416.975	182	477.425	100.75	315.575
215.475	416.65	178.425	477.425	99.45	314.275
214.825	416.65	178.425	477.425	96.85	313.625
214.5	416	174.525	477.425	90.675	313.625
214.5	415.675	173.875	477.1	90.675	312.975
213.525	415.35	173.55	477.1	89.05	312.975
213.2	414.7	173.225	476.775	89.05	312.975
213.2	414.375	172.25	476.45	88.4	312.325
213.2	414.375	172.25	476.45	88.075	312
212.225	414.375	170.95	476.125	87.425	311.025
212.225	414.05	169	475.8	87.1	310.7
210.925	413.4	168.675	475.8	81.9	309.4
208.975	412.425	168.35	475.8	77.675	309.4
208.325	412.1	168.025	475.475	74.75	308.425
207.675	411.125	167.7	474.825	74.425	307.125
207.025	410.475	167.05	474.825	74.425	307.125
206.05	408.525	164.125	474.175	73.775	306.15
204.75	408.2	163.8	473.85	72.8	305.175
203.45	408.2	162.825	473.85	71.825	305.175
202.8	408.2	161.2	473.525	69.225	305.175
202.475	407.875	160.55	473.525	68.25	304.525
201.5	407.875	159.25	473.2	67.275	300.625
199.55	407.55	159.25	473.2	65.65	298.025
195.975	407.55	156	472.875	58.5	296.725
195.325	406.9	155.35	472.875	54.6	295.75
194.675	406.575	155.35	472.55	48.75	295.75
192.725	406.575	154.375	472.55	43.875	295.425
192.725	404.3	152.75	472.225	41.6	295.425
191.425	402.35	152.1	472.225	40.95	294.45
190.45	402.025	150.15	471.9	39.325	292.825
190.125	401.05	149.5	471.9	36.725	290.225
189.8	400.725	145.925	471.575	36.075	289.9
189.475	400.075	144.625	471.25	33.8	286.65
188.5	399.425	144.3	471.25	30.55	285.35
188.175	399.425	143.975	470.6	23.075	284.7
186.875	399.425	142.35	470.6	19.825	284.7
184.925	399.1	142.025	470.275	19.5	283.4
183.3	398.125	140.725	470.275	15.6	277.55
182	397.475	140.725	469.95	15.275	276.25
181.025	397.475	136.825	469.625	12.025	274.3
181.025	397.15	136.5	469.625	7.8	271.375
180.05	396.175	136.175	469.625		270.075
180.05	396.175	135.2	469.3		270.075
178.1	396.175	133.25	469.3		267.8
174.525	395.2	132.275	469.3		267.15
173.875	394.875	129.675	468.975		266.825
173.225	393.9	128.7	468.975		265.2
172.25	393.575	127.075	468.65		264.55
172.25	393.575	127.075	468.325		262.925
171.925	393.25	126.75	468		262.6
169.975	392.925	125.45	468		260.325
168.35	392.925	125.125	468		257.075
168.025	392.6	124.475	468		254.8
166.725	392.275	124.15	468		253.825
162.825	391.95	123.175	467.675		250.9
161.85	391.625	122.525	467.675		249.925
161.2	390.65	121.225	467.35		249.925
160.875	390.325	120.575	467.025		249.6
158.275	390	118.625	466.7		246.675
157.3	389.35	115.375	466.7		245.05
155.675	389.025	113.75	466.375		240.5
155.675	388.7	111.8	466.375		239.525
154.375	388.7	104	466.05		235.95
153.725	387.4	103.35	466.05		233.675
153.725	386.425	103.025	465.725		233.35
152.75	386.425	102.375	465.725		228.15
151.45	386.1	97.825	465.725		227.5
150.8	385.45	96.2	465.725		227.175
150.8	385.125	92.3	465.4		225.55
150.475	385.125	90.025	465.075		224.575
148.525	385.125	84.5	465.075		222.625
143.325	385.125	83.2	465.075		222.625
140.075	383.175	82.225	464.75		222.625
139.75	382.525	80.6	464.425		221.975
138.775	381.875	78	464.425		220.35
138.775	381.225	76.7	464.425		219.7
137.15	381.225	74.75	464.1		218.075
136.175	380.9	73.45	463.775		214.175
135.525	380.575	73.45	463.775		210.275
133.575	380.25	72.475	463.775		207.675
133.25	379.275	72.475	463.45		207.025
131.3	378.3	72.15	463.45		207.025
130.975	376.675	71.825	463.45		206.375
130.65	376.35	71.175	463.45		206.05
130.325	376.35	70.2	463.125		206.05
129.675	375.7	66.625	461.825		205.725
126.75	375.375	64.675	461.5		205.725
126.75	375.05	63.7	461.5		205.725
124.15	374.075	63.05	461.175		201.5
121.875	373.75	62.725	460.85		201.175
119.925	371.15	61.75	460.85		199.225
119.925	370.175	60.45	460.85		196.95
119.275	370.175	60.45	460.85		195.65
118.95	370.175	57.525	460.525		195
118.95	369.525	55.575	460.525		194.675
118.625	369.525	50.7	460.525		194.675
118.625	368.875	48.75	460.2		194.675
118.3	368.875	47.45	459.875		194.35
117.975	368.225	46.475	459.875		192.075
117	368.225	44.525	459.875		191.425
116.025	362.7	42.575	459.875		191.1
114.4	362.05	41.925	459.875		188.825
114.075	361.725	41.275	459.55		188.175
113.1	361.4	38.35	459.55		186.55
112.45	361.075	36.725	459.225		184.6
110.825	360.425	36.725	458.9		183.95
109.2	360.1	36.4	458.9		183.625
104.325	359.775	36.075	458.575		179.4
103.675	357.825	34.125	458.25		172.9
103.025	357.825	33.15	457.925		170.95
102.375	357.5	32.825	457.925		170.3
101.725	356.85	31.525	457.925		170.3
101.4	355.225	31.2	457.6		168.35
101.4	354.9	27.95	457.275		167.7
101.075	354.25	27.625	457.275		163.475
99.775	353.925	23.075	456.95		162.175
98.8	353.925	21.125	456.95		161.2
98.475	352.3	20.8	456.625		159.9
98.475	351	19.175	455.975		158.6
95.55	351	18.525	455.65		158.275
95.55	351	18.2	455.65		157.625
92.625	350.35	16.25	455.325		156
92.625	350.025	16.25	455		155.35
81.575	350.025	15.925	454.675		154.375
80.925	349.375	15.6	454.675		153.725
80.925	349.375	14.625	454.35		153.725
78.65	348.4	14.3	454.35		150.8
78	348.4	13.65	454.35		148.85
74.1	348.075	11.375	454.025		148.525
73.775	347.75	8.125	453.7		148.2
72.475	347.75	7.8	453.7		147.55
72.475	347.75	5.85	453.7		146.25
71.825	345.8	5.85	453.7		144.3
70.2	345.8	5.525	453.375		138.125
69.875	345.475	5.2	453.375		134.55
69.55	345.15	1.95	453.05		130.65
69.225	343.525	1.3	453.05		129.35
66.3	343.525	0.975	452.725		129.35
65.975	342.225	0.65	452.725		128.375
65.65	341.25		452.725		126.425
65.325	340.275		452.725		126.1
65	340.275		452.075		126.1
63.7	339.3		452.075		125.775
62.075	338.325		451.75		125.45
61.425	338		451.75		125.45
61.1	338		451.1		124.15
60.45	336.05		451.1		122.85
58.825	336.05		451.1		122.85
58.5	335.725		450.775		121.875
58.175	335.4		450.775		117.325
57.85	335.075		450.775		116.675
56.875	334.1		450.125		116.025
54.6	333.45		449.8		113.1
52.975	332.475		449.8		111.8
52.325	332.475		449.475		109.85
51.35	332.15		449.475		107.25
51.025	332.15		449.15		107.25
50.375	331.5		448.825		106.925
48.75	331.175		448.5		106.6
48.75	330.85		448.175		105.95
48.425	330.525		447.85		105.3
47.775	330.2		447.2		103.025
47.45	329.55		446.875		102.375
46.8	329.225		446.875		102.05
45.5	327.925		446.875		101.725
45.175	327.275		446.55		100.425
45.175	326.95		446.55		99.775
45.175	325.975		446.225		99.125
43.875	325.325		446.225		97.5
43.55	324.675		445.9		97.175
40.625	324.675		445.9		96.2
39.975	324.35		445.575		91.65
39.325	324.35		445.575		91.325
37.7	323.375		445.575		89.7
37.375	322.725		445.25		86.45
37.05	322.725		445.25		86.45
36.4	322.725		444.925		86.125
36.075	322.725		444.925		84.175
33.8	322.075		444.6		83.85
33.475	320.45		444.275		80.925
31.85	319.8		444.275		80.925
29.25	319.15		443.95		80.275
26.325	318.5		443.95		79.625
26	317.525		443.95		76.05
25.35	317.525		443.95		75.725
25.35	317.2		443.95		75.075
20.475	315.9		443.95		74.75
17.875	315.25		443.3		74.425
17.55	314.925		442.975		73.775
15.6	314.925		442.65		73.775
11.05	314.6		442.65		72.8
2.6	314.275		442.65		71.825
0.65	313.3		442.65		71.175
	312.325		442.325		70.85
	310.375		442.325		69.55
	309.4		442		68.9
	309.075		442		68.25
	308.75		442		67.6
	308.75		442		66.95
	307.775		442		66.95
	307.45		441.35		65.975
	306.8		441.025		65
	306.15		440.7		64.675
	305.5		440.375		63.7
	304.85		440.375		61.75
	304.85		440.375		61.75
	304.525		440.375		61.75
	304.525		440.05		61.425
	303.875		440.05		60.125
	303.875		439.725		59.15
	303.55		439.725		58.175
	303.225		439.4		56.55
	302.9		439.4		56.55
	302.575		439.4		54.275
	302.25		439.075		53.625
	302.25		439.075		52.65
	301.925		438.75		52
	301.6		438.75		51.675
	300.95		438.75		50.7
	300.625		438.75		50.375
	300.625		437.775		49.4
	300.3		437.775		49.4
	299.975		437.775		48.75
	299.65		437.45		48.1
	299.65		437.125		48.1
	298.675		436.8		47.125
	298.675		436.475		45.825
	298.025		436.475		45.175
	298.025		436.475		44.85
	298.025		435.825		43.875
	297.7		435.825		42.9
	297.7		435.825		42.9
	297.375		435.825		41.925
	297.05		435.825		41.925
	296.725		435.5		41.275
	296.4		434.85		40.625
	294.125		434.85		39.65
	294.125		434.525		39.65
	293.475		434.2		38.675
	293.15		434.2		38.025
	292.825		434.2		37.375
	292.825		434.2		37.05
	291.525		433.875		36.725
	291.2		433.875		35.425
	290.875		432.9		34.125
	289.575		432.9		33.8
	287.95		432.575		32.825
	286.325		432.25		31.85
	286.325		432.25		30.225
	286		431.925		29.9
	286		431.925		28.6
	285.675		431.6		28.6
	285.35		431.275		28.6
	285.35		431.275		27.95
	285.025		431.275		27.625
	284.375		430.95		27.3
	284.05		430.625		26.65
	284.05		430.625		26
	283.725		430.625		24.05
	282.75		430.625		23.725
	282.425		430.3		23.075
	281.45		430.3		22.425
	280.8		430.3		22.1
	279.5		430.3		21.45
	279.175		429.975		20.15
	277.875		429.975		20.15
	277.55		429.65		18.85
	277.225		429.65		18.525
	276.9		429.65		17.55
	276.575		429.65		16.575
	274.95		429.65		15.275
	273.975		429.325		14.95
	273.65		429.325		14.3
	273.325		429.325		13.65
	273.325		429.325		13.325
	273		429.325		12.35
	273		429		11.375
	272.675		428.675		9.75
	272.35		428.35		9.1
	272.025		428.025		7.8
	271.7		428.025		1.95
	271.375		427.375		1.3
	271.05		427.375		0.65
	270.725		427.375		0.65
	270.075		427.375
	269.425		427.05
	268.45		427.05
	267.8		426.725
	267.15		426.725
	266.5		426.4
	266.5		426.075
	265.525		425.1
	264.55		425.1
	263.9		424.45
	263.9		424.45
	263.25		424.125
	263.25		423.8
	262.6		423.8
	262.275		423.475
	262.275		423.15
	261.95		422.825
	260.975		422.825
	260.325		422.825
	260.325		422.5
	260.325		422.175
	259.675		422.175
	259.675		422.175
	259.025		421.85
	258.7		421.525
	258.7		421.2
	258.375		421.2
	258.05		420.875
	258.05		420.875
	257.725		420.55
	257.4		420.55
	257.4		420.225
	257.4		420.225
	255.775		419.9
	255.125		419.9
	255.125		419.9
	255.125		419.9
	254.8		419.575
	254.475		419.575
	253.825		419.25
	253.825		419.25
	253.175		419.25
	253.175		419.25
	251.875		418.925
	251.225		418.925
	250.9		418.925
	250.9		418.6
	250.575		417.95
	250.25		417.95
	250.25		417.95
	249.275		417.95
	249.275		417.95
	247.975		417.625
	247		417.625
	246.675		417.625
	246.675		417.3
	246.35		416.975
	246.025		416.975
	245.375		416.65
	245.05		416.325
	243.75		415.675
	243.75		415.675
	243.75		415.675
	243.1		415.35
	242.45		415.35
	242.125		415.35
	241.8		414.7
	240.825		414.7
	240.825		414.375
	239.85		414.375
	239.525		414.375
	238.875		414.05
	238.225		414.05
	237.9		414.05
	237.9		413.725
	237.9		413.725
	236.6		413.725
	235.95		413.725
	235.3		413.725
	234.975		413.4
	234.325		413.4
	234		413.075
	233.675		413.075
	233.675		412.75
	233.675		412.425
	233.35		412.425
	233.35		412.1
	232.7		411.775
	232.375		411.775
	232.05		411.775
	232.05		411.775
	231.725		411.775
	231.4		411.45
	231.075		411.45
	231.075		411.45
	231.075		411.125
	230.75		410.8
	230.425		410.475
	230.1		410.15
	230.1		410.15
	230.1		409.825
	229.125		409.5
	229.125		409.5
	228.15		409.175
	227.825		409.175
	227.825		408.85
	227.5		408.85
	227.175		408.85
	226.525		408.85
	226.2		408.2
	226.2		407.875
	225.875		407.875
	225.875		407.55
	225.225		407.55
	224.575		407.225
	223.6		406.9
	223.6		406.9
	223.275		406.575
	223.275		406.25
	222.95		406.25
	222.95		406.25
	222.625		405.925
	222.3		405.925
	221.975		405.6
	221.975		405.275
	221.65		405.275
	221.325		405.275
	221.325		405.275
	221.325		405.275
	221.325		404.95
	221		404.95
	220.35		404.95
	220.35		404.95
	219.7		404.95
	219.375		404.95
	219.375		404.625
	219.375		404.625
	218.4		404.625
	218.075		403.975
	218.075		403.975
	217.425		403.65
	217.425		403.65
	217.1		403.325
	217.1		403.325
	217.1		403.325
	216.775		403
	216.45		402.675
	216.45		402.35
	216.45		402.35
	216.125		402.025
	215.8		402.025
	215.475		401.7
	215.15		401.7
	214.175		401.7
	213.525		401.7
	212.875		401.375
	212.875		401.375
	212.55		401.05
	212.55		401.05
	212.225		400.725
	211.9		400.4
	211.25		400.4
	210.925		400.075
	209.625		400.075
	208.325		400.075
	208		400.075
	208		399.75
	208		399.75
	208		399.75
	206.7		399.75
	206.375		399.425
	206.05		399.425
	206.05		399.425
	205.725		399.1
	205.725		398.45
	205.4		398.45
	204.425		398.45
	204.1		398.45
	203.775		398.45
	203.775		397.475
	203.775		397.475
	203.45		397.15
	203.125		397.15
	202.8		396.825
	202.475		396.825
	202.15		396.5
	202.15		396.5
	201.5		396.5
	201.175		396.5
	200.525		396.5
	200.525		396.175
	200.525		396.175
	199.55		396.175
	199.225		395.85
	198.9		395.85
	198.575		395.525
	198.25		395.525
	197.6		395.2
	197.6		395.2
	197.6		395.2
	197.275		394.55
	197.275		394.225
	197.275		394.225
	196.625		394.225
	196.3		393.9
	196.3		393.575
	195.325		393.575
	194.675		393.575
	194.35		393.25
	194.025		393.25
	193.375		393.25
	193.05		393.25
	192.4		392.6
	191.75		392.6
	191.75		392.275
	191.425		392.275
	191.425		391.95
	191.1		391.95
	190.775		391.95
	190.125		391.625
	190.125		391.625
	190.125		391.625
	189.8		391.625
	189.8		391.625
	189.475		391.625
	189.475		391.3
	189.15		391.3
	188.825		391.3
	188.5		391.3
	188.175		391.3
	188.175		390.975
	188.175		390.65
	187.85		390.325
	186.875		390.325
	186.875		390
	186.875		390
	186.55		390
	186.225		390
	186.225		389.675
	186.225		389.675
	186.225		389.35
	185.9		389.35
	185.25		388.375
	185.25		388.375
	184.6		388.05
	183.95		387.725
	183.625		386.75
	183.3		386.75
	182.975		386.75
	182.975		386.75
	182.65		386.75
	182.65		386.425
	182.325		386.425
	182		386.1
	181.675		385.775
	181.35		385.45
	181.35		385.125
	181.35		385.125
	181.025		385.125
	180.7		385.125
	180.7		384.8
	180.375		384.8
	180.375		384.8
	180.05		384.8
	180.05		384.15
	180.05		383.825
	179.075		383.825
	179.075		383.5
	179.075		383.5
	179.075		383.5
	179.075		383.175
	178.75		383.175
	178.75		383.175
	178.425		382.85
	178.425		382.85
	178.1		382.2
	177.775		381.875
	177.775		381.875
	177.45		381.55
	175.5		381.225
	175.175		380.9
	174.85		380.9
	174.525		380.9
	174.525		380.575
	174.2		380.25
	172.9		380.25
	172.575		380.25
	172.575		380.25
	172.25		379.925
	172.25		379.925
	172.25		379.6
	171.925		379.6
	171.925		379.275
	171.6		379.275
	171.275		379.275
	170.95		379.275
	170.625		379.275
	169.975		378.3
	169.975		378.3
	169.975		378.3
	169.65		377.975
	169.325		377.975
	169		377.65
	169		377.65
	169		377.65
	169		377.325
	168.675		377.325
	168.675		377
	168.35		377
	168.35		376.675
	167.7		376.675
	167.05		376.35
	166.4		376.35
	166.075		376.35
	166.075		375.7
	166.075		375.375
	165.425		375.05
	165.425		375.05
	165.1		374.725
	165.1		374.075
	164.125		374.075
	163.8		373.75
	163.8		373.425
	163.8		373.425
	163.475		372.775
	163.475		372.775
	162.825		372.775
	162.5		372.775
	162.5		372.775
	162.5		372.775
	162.5		372.775
	162.175		372.45
	161.85		372.125
	161.85		372.125
	161.2		371.8
	161.2		371.8
	160.875		371.475
	160.875		371.475
	160.875		371.475
	160.875		371.15
	160.225		371.15
	160.225		371.15
	160.225		371.15
	159.9		371.15
	159.9		370.825
	159.9		370.5
	159.9		370.175
	159.575		370.175
	159.575		370.175
	159.575		369.85
	158.925		369.525
	158.925		369.2
	158.6		369.2
	158.6		369.2
	158.6		369.2
	158.275		368.875
	158.275		368.875
	158.275		368.875
	158.275		368.55
	158.275		368.55
	157.95		368.55
	157.95		368.225
	157.95		368.225
	157.95		367.9
	157.95		367.9
	157.625		367.575
	157.625		367.25
	157.625		367.25
	157.625		367.25
	157.625		366.925
	156.975		366.925
	156.975		366.925
	156.975		366.925
	156.65		366.925
	156.65		366.925
	156		366.275
	156		366.275
	155.675		366.275
	155.675		366.275
	155.35		366.275
	155.35		366.275
	155.025		365.95
	155.025		365.95
	154.375		365.625
	154.05		365.625
	153.4		365.625
	153.075		365.3
	153.075		365.3
	152.425		364.975
	151.775		364.975
	151.775		364.65
	151.775		364
	151.775		364
	151.45		363.675
	151.45		363.675
	151.125		363.675
	150.475		363.35
	150.15		363.35
	150.15		363.35
	150.15		363.35
	149.825		363.025
	149.825		362.7
	149.825		362.7
	149.825		362.375
	149.5		362.375
	149.5		362.375
	149.5		362.375
	148.525		362.05
	147.875		362.05
	147.875		362.05
	147.55		362.05
	146.9		361.725
	146.575		361.725
	146.25		361.4
	145.6		361.4
	145.6		361.4
	145.275		361.4
	145.275		361.075
	144.95		361.075
	144.625		360.75
	144.3		360.75
	143.975		360.425
	143.975		360.425
	143.65		360.425
	143.325		360.425
	143		360.425
	142.35		360.425
	142.35		360.1
	142.35		360.1
	141.7		359.775
	141.375		359.775
	141.05		359.125
	140.725		359.125
	140.075		358.8
	139.75		358.8
	139.75		358.8
	139.425		358.475
	139.1		358.15
	139.1		357.825
	138.775		357.825
	138.45		357.825
	138.45		357.175
	138.45		357.175
	138.125		357.175
	138.125		357.175
	138.125		356.85
	137.8		356.525
	137.475		356.2
	137.15		356.2
	136.825		356.2
	136.825		356.2
	136.825		355.875
	136.5		355.55
	136.5		355.55
	136.5		355.225
	136.5		355.225
	136.175		355.225
	136.175		355.225
	136.175		354.9
	135.2		354.9
	135.2		354.9
	135.2		354.25
	134.55		354.25
	134.55		353.925
	134.225		353.925
	134.225		353.925
	134.225		353.925
	134.225		353.6
	133.9		353.6
	133.575		353.6
	133.575		352.95
	133.575		352.625
	133.25		352.3
	133.25		351.975
	133.25		351.975
	132.925		351.975
	132.6		351.65
	132.6		351.325
	132.6		351.325
	131.95		351.325
	131.625		351.325
	131.625		351.325
	130.975		351.325
	130.975		351.325
	130.975		351
	130.975		351
	130.65		351
	130		351
	130		350.675
	129.35		350.35
	129.025		350.025
	129.025		350.025
	128.375		349.7
	128.05		349.375
	128.05		349.375
	127.725		349.05
	127.725		348.725
	127.725		348.4
	127.4		348.4
	127.4		348.4
	127.075		348.4
	127.075		348.4
	126.75		348.4
	126.75		348.4
	126.75		348.075
	126.1		348.075
	125.775		348.075
	125.775		347.75
	125.45		347.75
	125.45		347.75
	125.45		347.425
	125.125		347.1
	125.125		346.775
	125.125		346.45
	124.8		346.45
	124.8		346.45
	124.15		346.45
	124.15		346.125
	124.15		346.125
	124.15		346.125
	123.5		346.125
	123.175		345.8
	122.525		345.8
	122.2		345.475
	122.2		345.475
	122.2		345.15
	122.2		345.15
	122.2		345.15
	121.875		345.15
	121.875		344.5
	121.225		344.175
	121.225		344.175
	121.225		344.175
	121.225		344.175
	120.9		343.85
	120.9		343.85
	120.9		343.525
	120.575		343.525
	120.575		343.2
	120.25		342.875
	120.25		342.55
	119.925		342.55
	119.925		342.55
	119.6		342.55
	119.275		342.55
	118.95		342.225
	118.625		342.225
	118.3		341.575
	117.975		341.25
	117.975		341.25
	117.975		341.25
	117.65		341.25
	117.325		340.275
	117.325		340.275
	117.325		339.95
	117		339.95
	117		339.95
	116.675		339.95
	116.675		339.95
	116.675		339.625
	116.35		339.3
	116.35		339.3
	116.35		338.975
	116.35		338.975
	116.35		338.975
	116.35		338.975
	116.025		338.975
	115.7		338.65
	115.7		338.65
	115.375		338.65
	115.375		338.325
	115.05		338
	115.05		337.675
	115.05		337.675
	115.05		337.675
	114.4		337.675
	114.4		337.35
	114.075		337.025
	113.75		336.7
	113.425		336.7
	113.1		336.7
	113.1		336.375
	113.1		336.375
	113.1		336.05
	112.45		336.05
	112.45		336.05
	112.45		335.725
	112.125		335.725
	112.125		335.4
	111.8		335.4
	111.8		335.4
	111.15		335.075
	111.15		335.075
	111.15		335.075
	110.5		335.075
	110.175		334.75
	109.85		334.75
	109.525		334.425
	109.525		334.1
	109.2		333.775
	109.2		333.45
	108.875		333.45
	108.875		333.45
	108.55		333.45
	108.55		333.125
	108.225		333.125
	107.9		332.8
	107.25		332.475
	106.6		332.475
	106.6		332.475
	106.275		332.475
	106.275		332.475
	105.95		332.475
	105.95		332.475
	105.95		332.15
	105.625		332.15
	105.625		332.15
	105.3		332.15
	105.3		331.825
	104.975		331.825
	104.975		331.825
	104.65		331.825
	104.65		331.825
	104.65		331.5
	104.325		331.5
	104		331.5
	103.675		331.175
	103.35		331.175
	103.35		331.175
	103.35		330.525
	102.7		330.525
	102.7		330.525
	102.375		330.525
	102.05		330.525
	102.05		330.525
	102.05		330.2
	102.05		330.2
	101.725		330.2
	101.725		330.2
	101.075		330.2
	101.075		329.875
	101.075		329.875
	100.75		329.225
	100.75		329.225
	100.425		328.9
	100.425		328.9
	100.425		328.575
	100.1		328.575
	99.775		328.575
	99.45		328.25
	99.45		328.25
	99.125		328.25
	98.8		328.25
	98.8		328.25
	98.475		327.6
	98.475		327.6
	98.15		327.6
	97.825		327.6
	97.825		327.275
	97.5		326.625
	97.175		326.3
	97.175		326.3
	96.85		325.975
	96.525		325.975
	96.525		325.975
	96.525		325.975
	96.525		325.65
	96.2		325.325
	96.2		325.325
	96.2		325.325
	95.875		325
	95.875		325
	95.55		325
	95.55		325
	95.55		324.675
	94.575		324.675
	94.575		324.025
	94.25		324.025
	93.925		324.025
	93.925		324.025
	93.925		324.025
	93.925		323.7
	93.6		323.7
	93.275		323.7
	93.275		323.375
	92.95		323.375
	92.95		323.05
	92.625		323.05
	92.3		322.725
	92.3		322.725
	92.3		322.4
	92.3		322.4
	91.975		322.4
	91.65		322.075
	91.65		322.075
	91.325		322.075
	91.325		321.75
	91		321.425
	91		321.425
	90.675		321.425
	90.675		321.425
	90.675		321.425
	90.35		321.425
	90.025		321.1
	90.025		321.1
	90.025		321.1
	90.025		321.1
	90.025		320.775
	89.7		320.775
	89.375		320.775
	89.05		320.775
	88.725		320.775
	88.4		320.45
	88.075		320.45
	87.75		320.45
	87.425		320.45
	87.425		320.125
	87.1		320.125
	87.1		319.8
	87.1		319.8
	86.775		319.8
	86.45		319.8
	86.45		319.8
	86.125		319.475
	85.8		319.475
	85.8		319.15
	85.475		319.15
	85.15		319.15
	85.15		318.825
	85.15		318.825
	84.5		318.5
	84.5		318.175
	84.5		318.175
	84.175		318.175
	84.175		318.175
	83.85		318.175
	83.2		317.85
	83.2		317.85
	82.875		317.85
	82.875		317.85
	82.225		317.525
	82.225		317.525
	81.9		317.525
	81.575		317.2
	81.575		317.2
	81.25		317.2
	81.25		317.2
	81.25		317.2
	81.25		317.2
	81.25		316.875
	81.25		316.875
	80.6		316.875
	80.275		316.875
	80.275		316.875
	80.275		316.875
	80.275		316.55
	79.95		316.225
	79.625		316.225
	78.975		315.9
	78.975		315.9
	78.65		315.575
	78.325		315.575
	78		315.575
	77.35		315.575
	77.35		315.25
	77.025		315.25
	77.025		314.6
	77.025		314.6
	77.025		314.275
	76.7		314.275
	76.7		314.275
	76.375		314.275
	76.375		314.275
	76.375		313.95
	76.05		313.95
	76.05		313.95
	76.05		313.95
	75.725		313.95
	75.725		313.625
	75.4		313.625
	75.075		313.625
	74.425		313.625
	74.425		313.3
	74.425		312.975
	74.1		312.975
	74.1		312.975
	74.1		312.975
	73.775		312.65
	73.775		312.65
	73.775		312
	73.45		312
	73.45		312
	73.45		312
	72.8		311.675
	72.475		311.675
	72.475		311.675
	72.15		311.35
	72.15		311.35
	71.825		311.025
	71.5		311.025
	71.175		311.025
	71.175		311.025
	70.85		311.025
	70.85		311.025
	70.2		311.025
	69.875		311.025
	69.875		311.025
	69.875		310.7
	69.55		310.375
	69.55		310.375
	69.55		310.05
	69.55		309.725
	68.9		309.725
	68.9		309.725
	68.575		309.725
	68.575		309.725
	68.575		309.4
	68.25		309.4
	68.25		309.4
	68.25		309.4
	68.25		309.4
	67.6		309.075
	67.275		308.75
	67.275		308.75
	66.95		308.425
	66.625		308.1
	66.625		308.1
	66.3		307.775
	66.3		307.775
	66.3		307.775
	66.3		307.775
	65.65		307.775
	65.325		307.45
	65.325		307.45
	65		307.125
	65		307.125
	64.675		307.125
	64.35		306.8
	64.35		306.8
	64.35		306.8
	64.025		306.475
	64.025		306.15
	64.025		306.15
	63.7		306.15
	63.05		305.825
	62.725		305.825
	62.725		305.825
	62.4		305.5
	62.4		305.175
	62.4		304.525
	62.075		304.525
	61.75		304.2
	61.425		304.2
	61.425		304.2
	61.425		303.875
	61.1		303.55
	60.775		303.55
	60.775		302.9
	60.775		302.575
	60.45		302.575
	60.45		302.575
	60.125		302.575
	60.125		302.25
	59.475		302.25
	59.15		302.25
	59.15		302.25
	58.825		301.925
	58.5		301.925
	58.5		301.275
	57.85		301.275
	57.85		301.275
	57.525		300.95
	57.2		300.95
	56.875		300.95
	56.55		300.95
	56.55		300.625
	56.55		300.625
	55.575		300.625
	55.25		300.625
	55.25		300.625
	55.25		300.625
	54.6		300.625
	54.6		300.625
	54.6		300.3
	54.6		300.3
	54.6		300.3
	54.275		299.975
	53.95		299.65
	53.625		299.325
	53.3		299.325
	52.975		299.325
	52.975		299.325
	52.975		299.325
	52.975		299
	52.975		299
	52.65		298.675
	52		298.675
	51.675		298.35
	51.675		298.35
	51.675		298.35
	51.35		298.025
	51.025		298.025
	51.025		297.7
	50.375		297.7
	50.375		297.7
	50.375		297.7
	50.05		297.375
	50.05		297.375
	49.725		297.375
	49.725		297.05
	49.075		297.05
	48.425		297.05
	48.425		296.725
	48.1		296.725
	47.45		296.725
	47.45		296.4
	47.45		296.4
	47.125		296.4
	46.8		296.075
	46.475		295.75
	46.15		295.425
	45.825		295.425
	45.825		295.1
	45.825		295.1
	45.825		294.775
	45.825		294.45
	45.5		294.45
	45.5		294.45
	45.5		294.125
	45.5		294.125
	45.175		293.8
	44.85		293.475
	44.2		293.475
	43.875		293.475
	43.55		293.15
	43.225		293.15
	42.9		293.15
	42.575		293.15
	42.25		293.15
	41.275		293.15
	41.275		293.15
	41.275		292.825
	40.95		292.175
	40.3		292.175
	39.975		292.175
	39.65		292.175
	39.325		292.175
	39.325		292.175
	38.675		291.85
	38.025		291.85
	38.025		291.525
	37.7		291.525
	37.7		291.525
	37.375		291.525
	36.725		291.525
	36.4		291.525
	36.075		291.525
	36.075		291.525
	36.075		291.2
	35.75		291.2
	35.75		291.2
	35.75		290.875
	35.425		290.875
	35.425		290.875
	35.1		290.875
	34.775		290.875
	34.45		290.55
	34.125		290.225
	33.8		290.225
	32.825		290.225
	32.175		290.225
	31.85		290.225
	31.85		290.225
	31.85		289.9
	31.525		289.9
	31.525		289.9
	31.525		289.575
	31.525		289.25
	31.2		289.25
	30.875		289.25
	30.55		288.925
	30.55		288.925
	30.55		288.925
	30.55		288.6
	30.225		288.6
	29.575		288.275
	28.275		288.275
	27.95		288.275
	27.95		287.95
	27.625		287.625
	27.3		287.625
	27.3		287.625
	26		287.625
	24.7		287.3
	24.375		287.3
	23.725		287.3
	23.4		287.3
	23.4		286.975
	23.4		286.975
	22.75		286.975
	22.425		286.65
	21.775		286.65
	21.125		286.325
	21.125		286.325
	20.8		286.325
	19.5		286.325
	19.175		286.325
	18.2		286.325
	16.575		286
	16.25		285.675
	16.25		285.675
	15.925		285.35
	13.65		285.35
	13		285.35
	11.7		285.35
	11.05		285.35
	10.725		285.025
	10.4		285.025
	10.075		285.025
	9.75		285.025
	9.425		284.7
	9.425		284.7
	9.425		284.7
	8.775		284.7
	7.8		284.375
	7.8		284.375
	7.8		284.375
	7.8		284.375
	7.475		284.375
	7.475		284.05
	7.15		284.05
	7.15		284.05
	6.825		284.05
	6.5		284.05
	4.55		284.05
	4.55		284.05
	3.9		284.05
	3.575		284.05
	3.25		284.05
	2.275		283.725
	1.95		283.725
	1.95		283.725
	1.95		283.4
	1.3		283.4
	0.65		283.4
			283.4
			283.4
			283.075
			282.75
			282.75
			282.75
			282.425
			282.425
			282.425
			282.1
			282.1
			282.1
			282.1
			282.1
			281.775
			281.775
			281.775
			281.775
			281.775
			281.775
			281.45
			281.45
			281.45
			281.125
			281.125
			281.125
			280.8
			280.8
			280.475
			280.475
			280.475
			280.15
			280.15
			280.15
			279.825
			279.825
			279.825
			279.825
			279.5
			279.175
			279.175
			279.175
			278.85
			278.85
			278.85
			278.85
			278.525
			278.2
			278.2
			278.2
			278.2
			277.875
			277.875
			277.55
			277.55
			277.55
			277.55
			277.225
			277.225
			277.225
			277.225
			277.225
			276.9
			276.9
			276.9
			276.575
			276.575
			276.25
			276.25
			276.25
			276.25
			275.925
			275.925
			275.925
			275.925
			275.925
			275.925
			275.925
			275.6
			275.6
			275.6
			275.275
			274.95
			274.95
			274.95
			274.95
			274.625
			274.625
			274.625
			274.625
			274.625
			274.3
			274.3
			274.3
			274.3
			273.975
			273.975
			273.65
			273.65
			273.325
			273
			273
			273
			272.675
			272.675
			272.675
			272.35
			272.025
			272.025
			272.025
			272.025
			272.025
			271.7
			271.7
			271.375
			271.375
			271.05
			271.05
			271.05
			270.725
			270.725
			270.725
			270.4
			270.4
			270.4
			270.4
			270.075
			270.075
			270.075
			269.75
			269.75
			269.75
			269.75
			269.425
			269.425
			269.1
			269.1
			269.1
			269.1
			268.775
			268.45
			268.45
			268.45
			268.125
			268.125
			268.125
			268.125
			268.125
			267.8
			267.8
			267.475
			267.475
			267.15
			267.15
			267.15
			267.15
			266.825
			266.825
			266.5
			266.5
			266.5
			266.5
			266.5
			266.175
			265.85
			265.85
			265.85
			265.85
			265.525
			265.525
			265.2
			264.875
			264.875
			264.875
			264.875
			264.55
			264.55
			264.55
			264.55
			264.55
			264.55
			264.225
			264.225
			264.225
			263.9
			263.9
			263.9
			263.9
			263.575
			263.575
			263.575
			263.25
			263.25
			263.25
			263.25
			263.25
			262.925
			262.925
			262.925
			262.6
			262.6
			262.6
			262.6
			262.6
			262.275
			262.275
			262.275
			262.275
			262.275
			262.275
			261.95
			261.95
			261.95
			261.625
			261.625
			261.3
			261.3
			261.3
			261.3
			260.975
			260.975
			260.65
			260.65
			260.325
			260.325
			260.325
			260.325
			260.325
			260.325
			260
			260
			260
			260
			260
			260
			260
			260
			259.675
			259.35
			259.025
			259.025
			259.025
			259.025
			259.025
			258.7
			258.7
			258.375
			258.375
			258.375
			258.375
			258.375
			258.375
			258.375
			258.05
			258.05
			258.05
			258.05
			258.05
			257.725
			257.725
			257.4
			257.4
			257.4
			257.075
			257.075
			257.075
			256.75
			256.75
			256.75
			256.425
			256.425
			256.425
			256.425
			256.1
			256.1
			256.1
			256.1
			256.1
			256.1
			256.1
			255.775
			255.775
			255.775
			255.775
			255.775
			255.125
			255.125
			255.125
			255.125
			255.125
			254.8
			254.8
			254.8
			254.8
			254.8
			254.8
			254.475
			254.475
			254.15
			254.15
			254.15
			254.15
			254.15
			254.15
			253.825
			253.5
			253.5
			253.5
			253.5
			253.5
			253.175
			253.175
			253.175
			253.175
			252.85
			252.85
			252.85
			252.85
			252.85
			252.85
			252.525
			252.2
			252.2
			251.875
			251.875
			251.875
			251.875
			251.875
			251.875
			251.55
			251.55
			251.55
			251.55
			251.55
			251.55
			251.55
			251.55
			251.225
			251.225
			250.9
			250.9
			250.9
			250.9
			250.9
			250.9
			250.9
			250.9
			250.575
			250.575
			250.25
			250.25
			250.25
			249.925
			249.925
			249.925
			249.925
			249.925
			249.6
			249.275
			249.275
			249.275
			249.275
			249.275
			248.95
			248.95
			248.625
			248.625
			248.625
			248.3
			248.3
			248.3
			247.975
			247.975
			247.975
			247.975
			247.65
			247.65
			247.65
			247.65
			247.325
			247.325
			247.325
			247.325
			247.325
			247.325
			247
			247
			246.675
			246.675
			246.675
			246.675
			246.675
			246.675
			246.35
			246.35
			246.35
			246.35
			246.025
			246.025
			246.025
			246.025
			245.7
			245.7
			245.7
			245.375
			245.375
			245.05
			245.05
			244.725
			244.725
			244.725
			244.4
			244.4
			244.075
			244.075
			244.075
			243.75
			243.1
			243.1
			243.1
			243.1
			242.775
			242.775
			242.775
			242.775
			242.775
			242.775
			242.45
			242.45
			242.125
			242.125
			242.125
			242.125
			242.125
			241.8
			241.8
			241.475
			241.15
			241.15
			241.15
			241.15
[truncated: 2,259 more rows]

## Sheet: Figure 6B
	Time Since Glucose Addition			Time Since Glucose Addition			Time Since Glucose Addition			Time Since Glucose Addition			Time Since Glucose Addition			Time Since Glucose Addition
Control Low	Non-clustered	Clustered	Control High	Non-clustered	Clustered	Noc Low	Non-clustered	Clustered	Noc High	Non-clustered	Clustered	Taxol Low	Non-clustered	Clustered	Taxol High	Non-clustered	Clustered
	598	598.05		599.675	600		599.025	596.1		600	599.35		594.15	587.65		599.35	597.725
	597.075	597.725		598.7	600		598.05	572.05		600	599.35		589.275	581.475		598.375	597.075
	596.1	594.8		598.375	593.175		588.95	563.925		598.05	598.7		587.325	572.7		597.4	596.75
	595.775	582.125		598.375	587.975		582.45	555.8		597.4	598.05		585.375	565.225		597.4	593.825
	594.8	576.275		597.725	587		582.45	549.95		597.075	597.725		582.125	560.025		594.8	593.825
	591.55	568.475		596.75	583.75		581.15	549.625		597.075	597.4		581.15	557.1		594.475	592.85
	590.9	568.15		596.75	583.425		580.175	533.7		596.425	596.75		579.525	521.025		593.825	592.2
	590.9	568.15		593.825	578.875		579.85	532.4		596.1	596.425		577.9	515.175		591.875	590.25
	589.6	565.875		592.85	578.55		574	528.5		596.1	596.1		577.9	503.15		590.25	584.725
	589.6	565.225		591.875	574.65		573.675	527.525		595.775	593.825		577.575	501.2		589.275	582.45
	583.425	564.9		590.575	572.7		573.35	514.525		595.45	593.825		576.925	496.325		588.625	575.625
	580.175	560.35		590.25	567.5		572.375	512.9		595.125	593.825		570.1	488.85		587.975	574
	580.175	552.55		589.6	567.175		564.9	507.7		595.125	593.175		566.525	488.525		587.65	573.675
	577.9	550.275		588.3	565.875		560.35	507.05		594.475	592.85		561.325	473.9		586.35	573.025
	577.9	549.3		587.325	565.55		558.075	487.875		593.825	592.525		560.35	460.25		586.025	572.7
	576.925	547.025		585.05	565.225		556.125	484.3		593.5	591.875		559.7	428.4		585.05	571.4
	576.275	545.725		584.725	562.3		554.825	470		592.85	591.225		559.375	413.775		584.4	570.1
	575.95	541.825		584.725	560.675		552.875	452.45		592.525	591.225		554.5	408.575		583.75	569.45
	574.65	520.7		584.4	558.075		552.875	448.225		592.525	590.9		552.875	405.325		583.75	569.125
	572.05	509.975		584.4	557.1		552.55	445.3		592.525	590.575		551.9	403.375		581.8	564.9
	570.1	493.4		584.4	552.875		548.65	439.775		592.2	590.575		548.975	390.7		581.15	563.925
	566.525	489.175		583.75	552.875		545.725	428.075		592.2	590.575		548.65	390.05		580.175	563.275
	566.2	474.55		583.1	551.9		545.075	426.125		592.2	590.575		547.675	386.475		579.2	554.825
	564.575	473.575		580.175	548.975		544.1	425.475		591.875	589.925		546.7	385.5		578.55	553.2
	564.25	470		578.225	548.975		543.45	423.2		590.575	589.6		544.1	383.55		573.675	550.925
	563.6	460.9		576.275	548.325		538.575	414.425		589.925	587.975		543.125	364.375		570.1	550.925
	562.625	451.15		574.325	546.7		538.575	413.775		589.6	587.975		540.85	350.4		568.8	550.6
	559.7	441.725		574	545.4		533.7	412.15		589.275	587.65		540.525	349.425		567.825	549.95
	558.4	438.475		573.675	544.1		531.425	405		588.95	587.325		535.65	341.95		565.55	549.3
	558.4	436.2		572.375	543.45		530.775	394.275		588.95	585.375		533.375	328.95		564.9	548
	558.4	423.85		572.05	542.475		530.45	390.375		588.3	585.05		533.375	324.075		563.275	546.7
	556.125	419.625		572.05	539.875		529.15	386.8		587.975	585.05		532.725	314.975		562.3	542.475
	555.8	418.325		571.725	538.9		526.875	384.85		587.325	584.725		531.1	312.7		561	538.9
	553.2	409.875		571.725	538.25		521.35	379.325		587.325	584.725		530.775	298.075		560.025	531.425
	552.875	405		571.4	538.25		520.05	376.725		587.325	584.4		528.825	296.125		560.025	531.425
	551.9	387.775		570.75	538.25		514.525	375.425		587	584.075		528.5	294.175		555.15	531.1
	550.275	386.8		570.425	531.425		512.575	371.85		587	584.075		527.2	293.525		554.825	528.825
	550.275	342.6		570.1	523.3		509	367.95		586.675	583.1		525.575	277.925		550.275	525.575
	549.3	342.6		569.775	522.975		508.675	366.65		586.35	582.45		524.275	250.625		547.025	522.975
	548	325.05		568.475	522.65		505.75	364.05		586.35	582.125		523.3	247.375		543.45	522.975
	548	319.2		568.475	519.4		505.1	362.1		586.35	581.8		520.375	244.775		542.15	522.975
	548	318.225		568.15	518.75		505.1	360.15		586.025	581.475		517.775	240.875		541.5	522
	547.025	304.25		567.825	518.75		503.8	354.625		586.025	581.475		514.2	230.8		540.2	519.075
	546.05	297.1		567.825	518.425		503.8	337.075		585.375	581.15		509.975	226.575		535.65	518.75
	545.725	296.125		567.825	517.775		501.2	335.45		585.375	581.15		508.35	225.275		534.35	516.475
	543.775	294.825		567.5	515.825		501.2	335.45		585.375	580.825		507.7	222.675		533.7	515.825
	543.125	293.2		567.175	515.825		499.9	330.9		584.725	580.825		507.375	205.775		533.7	515.825
	543.125	286.05		566.85	515.175		499.575	330.25		584.725	580.825		505.425	195.05		532.075	514.2
	542.15	282.475		566.85	514.525		489.825	323.1		583.425	580.825		505.1	192.125		531.75	512.25
	540.2	279.55		566.2	511.275		484.625	319.2		583.1	580.5		503.8	170.675		527.525	509.975
	536.95	274.675		565.875	509.325		483.975	316.6		583.1	580.5		499.25	152.8		526.55	509.975
	535	272.725		565.875	509		479.425	304.9		582.45	580.5		495.025	147.275		526.55	507.05
	535	271.425		565.875	507.375		478.45	295.15		582.125	578.875		492.75	145.65		526.55	504.775
	534.675	269.475		565.55	502.825		472.275	293.2		581.8	578.225		492.425	138.5		525.25	504.125
	534.35	268.5		564.575	500.55		470	275		581.8	577.9		492.425	123.875		524.925	502.825
	534.025	268.175		564.25	500.55		464.15	270.775		581.15	576.275		492.425	119.325		518.75	500.55
	533.05	261.025		562.625	500.225		462.85	264.925		580.825	576.275		491.775	116.725		518.1	499.25
	532.075	254.525		562.3	497.625		461.875	253.55		580.5	576.275		491.125			517.45	495.35
	531.1	252.25		559.7	496.65		460.9	250.95		580.5	575.95		489.175			515.825	495.35
	529.475	248.35		558.725	496.65		460.9	248.025		579.85	575.95		488.525			514.2	494.7
	525.575	242.825		558.725	496		457.325	239.25		579.85	575.625		484.3			513.55	493.725
	524.275	241.85		558.725	495.675		456.35	236		579.85	574.975		483.65			512.25	489.5
	523.95	217.15		558.075	494.05		453.425	232.1		578.55	574.975		483			510.95	489.5
	522.65	215.525		557.1	493.4		449.2	216.5		578.225	574.65		483			509.325	488.2
	520.7	209.675		557.1	492.1		448.875	215.2		577.9	574.65		478.125			506.725	484.95
	520.05	197		557.1	491.125		447.575	212.275		577.9	574		470			505.1	484.95
	518.1	194.4		556.45	488.2		446.925	207.075		577.9	573.675		469.675			501.525	483.975
	516.475	193.1		555.8	487.875		445.95	203.175		577.575	573.025		467.725			500.225	483.975
	513.225	184.325		554.5	487.55		444.65	202.525		577.575	572.7		465.125			498.925	481.7
	509.325	181.4		552.225	486.575		442.05	200.575		577.575	572.375		463.5			496.975	479.75
	508.35	175.55		552.225	480.725		441.075	183.025		577.25	572.05		462.525			491.775	475.85
	506.725	172.625		551.9	479.425		439.775	177.825		576.6	572.05		462.525			490.8	474.875
	505.75	161.575		551.25	478.125		438.8	170.025		576.275	571.4		459.925			489.175	470.65
	504.45	160.925		550.925	477.475		438.8	163.2		575.95	571.4		459.925			486.575	470.65
	500.875	153.775		550.6	477.475		437.825	158		575.625	571.4		459.6			480.4	467.075
	500.55	141.1		549.625	477.15		436.85	153.45		575.625	571.4		457.975			474.55	463.175
	499.9	131.025		548.65	476.175		435.875	144.675		574.975	571.4		452.125			471.625	459.275
	496.325	130.375		548	472.925		435.55	143.7		574.65	570.75		449.2			470	457.65
	496.325	127.45		546.05	472.6		435.55	143.05		573.35	570.75		448.225			467.725	457.325
	494.7	91.05		545.725	472.275		433.275	140.45		573.025	569.775		446.925			464.8	454.075
	492.75			545.4	470.65		430.675	128.75		573.025	569.775		443.675			464.475	452.775
	492.75			545.075	470.325		430.675	121.925		572.7	568.15		443.025			464.15	451.15
	488.85			544.75	469.35		428.075	116.725		572.375	567.825		442.7			459.6	445.625
	488.525			544.75	469.025		427.75	116.4		572.05	567.175		439.775			457	445.625
	487.225			544.425	466.425		423.525	113.15		571.4	566.525		437.825			455.05	445.3
	485.6			544.1	466.425		422.55	112.825		571.075	566.2		434.9			455.05	444.325
	484.95			544.1	465.45		420.6	111.525		570.75	566.2		429.7			450.5	443.675
	482.35			543.775	465.125		420.6	100.8		570.1	566.2		427.1			449.2	440.1
	482.35			543.45	465.125		412.8	99.175		570.1	565.875		424.175			448.875	432.3
	476.175			543.125	458.3		412.475	98.2		569.775	565.875		423.525			446.925	432.3
	473.9			542.8	456.35		408.575	96.25		569.45	565.55		421.9			444.975	431
	469.35			541.5	456.35		407.925	95.925		569.125	565.55		421.25			444.975	430.025
	469.025			540.2	455.375		406.3	95.6		568.475	564.25		418.975			442.05	429.375
	468.7			540.2	451.15		406.3	94.3		567.825	563.275		414.1			438.8	428.725
	468.375			539.225	450.175		406.3	93.65		567.825	562.625		412.475			438.15	428.725
	468.05			535.65	449.525		404.35	87.8		567.175	562.3		409.55			434.25	428.725
	467.075			535.65	441.725		403.05			566.525	562.3		409.225			433.275	426.45
	466.75			535.325	440.1		400.45			565.875	561.975		408.575			432.3	424.175
	466.425			535	437.5		397.525			565.875	561.325		407.6			425.8	418.325
	463.5			534.025	435.225		397.525			565.55	561		402.725			424.5	416.7
	463.175			533.05	433.925		394.925			565.55	560.675		402.075			422.225	414.75
	461.875			532.725	433.925		391.025			563.925	560.35		401.75			420.6	412.15
	461.55			531.75	431		390.7			563.6	560.025		401.75			419.625	410.2
	461.225			531.1	430.35		388.75			563.275	559.375		400.45			419.3	408.9
	457.65			530.125	430.025		388.1			563.275	559.05		398.175			418.65	408.575
	454.4			530.125	430.025		385.825			562.95	559.05		396.875			418.325	406.3
	454.075			530.125	429.375		382.575			562.95	558.725		390.375			415.4	405.975
	453.1			530.125	427.75		382.25			562.3	558.075		383.225			414.75	404.675
	452.125			529.8	427.75		380.95			561.975	557.75		381.925			413.125	401.1
	451.8			529.15	425.8		380.95			561.975	557.425		374.775			411.175	398.825
	451.15			528.5	425.475		378.025			561	557.425		371.2			409.55	395.9
	450.175			528.5	418.325		373.475			560.675	557.1		370.55			407.275	395.575
	449.2			528.5	418		371.2			560.675	556.775		370.55			407.275	393.625
	448.875			528.175	418		370.875			560.35	556.45		364.7			405.65	393.625
	445.3			528.175	415.4		370.55			560.025	556.45		363.4			404.35	392.975
	444			527.525	414.1		370.55			559.7	556.125		362.75			403.375	392.975
	443.35			527.2	413.45		369.9			559.375	555.8		361.125			398.825	392.975
	442.05			526.225	412.15		368.275			558.725	553.525		354.625			398.175	392
	441.075			525.25	411.5		367.625			558.4	553.2		353			394.275	390.7
	440.1			524.6	410.85		366.325			557.75	553.2		346.825			392.325	389.4
	440.1			522.975	410.2		363.4			557.425	552.875		346.175			391.025	388.425
	438.475			522.975	409.55		363.4			557.425	552.55		344.225			389.4	387.125
	437.5			521.025	407.925		363.075			557.1	552.225		343.575			387.125	385.175
	436.85			520.05	407.275		362.425			555.8	551.25		340.325			386.15	384.525
	432.3			519.725	402.725		361.775			555.8	551.25		337.725			385.175	378.025
	431.65			519.075	402.725		360.15			555.475	550.6		334.8			385.175	376.725
	427.425			518.75	394.925		354.625			554.825	550.275		334.15			380.625	375.75
	423.525			518.425	394.275		351.05			554.825	550.275		333.825			375.75	374.45
	420.6			518.1	388.75		350.075			554.175	549.625		332.85			375.425	366.65
	420.275			517.775	387.775		348.775			553.85	549.3		331.225			375.425	357.55
	419.95			517.775	385.5		346.5			553.85	549.3		329.925			372.825	356.25
	419.3			517.45	384.85		343.25			553.525	548.975		323.425			370.225	351.375
	416.7			516.475	384.525		341.625			552.875	548.975		322.125			369.9	347.8
	416.375			516.475	383.875		340.65			552.55	548.65		319.2			365.35	347.15
	415.4			515.5	383.55		339.675			552.225	548.325		314			364.7	345.2
	412.8			513.55	380.625		338.7			551.9	548		313.35			364.7	342.925
	411.825			513.225	378.675		338.05			551.9	548		309.125			363.4	342.6
	409.55			512.9	378.675		336.75			551.575	548		308.475			354.3	340.325
	406.625			512.9	378.025		333.825			550.6	547.675		299.375			350.075	337.075
	405.975			511.925	373.475		330.25			549.95	547.35		293.2			350.075	334.8
	402.725			511.275	373.15		330.25			549.625	547.025		291.25			346.825	329.925
	395.575			511.275	367.95		326.675			549.625	546.7		287.35			344.55	329.6
	392			510.3	365.675		322.125			549.3	546.7		286.05			333.825	325.05
	379.975			510.3	362.75		320.5			548	546.375		286.05			330.9	320.5
	377.375			510.3	357.875		318.875			548	546.05		284.425			329.925	315.95
	376.075			510.3	357.55		316.925			547.675	545.725		282.15			326.675	308.15
	374.125			509.65	357.225		316.275			546.375	545.725		281.175			319.525	307.5
	372.175			508.675	356.575		315.3			546.05	545.075		279.875			313.675	304.575
	370.55			507.7	354.95		314.975			545.725	544.75		270.775			313.35	302.625
	367.3			507.375	353.975		314.325			545.725	544.425		270.45			307.175	302.625
	366.975			507.375	353.325		302.3			545.4	544.1		264.275			305.55	302.625
	366.65			506.4	352.675		300.35			545.075	543.775		255.175			301.975	298.075
	366			506.4	348.45		299.7			545.075	543.45		254.525			300.35	287.675
	366			506.4	347.8		289.95			544.425	543.125		242.5			299.7	286.375
	365.675			506.4	341.95		289.3			544.425	541.5		242.175			294.175	286.05
	365.025			505.425	340.325		288.325			543.775	541.175		240.875			290.275	286.05
	357.875			505.1	339.675		288			543.775	540.85		238.925			287.025	285.725
	357.225			504.775	339.025		286.375			543.45	540.85		237.95			287.025	285.725
	355.925			504.45	338.7		285.725			543.45	540.85		236.65			281.5	285.725
	354.625			503.8	338.05		285.075			543.45	540.525		235.675			281.175	274.35
	349.1			502.5	337.725		284.75			541.825	540.525		234.375			279.225	252.9
	347.8			501.2	337.4		283.775			541.5	539.875		231.125			276.95	250.3
	347.475			500.875	335.125		283.125			540.85	539.55		229.5			275.65	241.2
	341.3			500.225	333.825		283.125			540.525	538.9		228.85			275	236
	338.05			499.9	331.225		281.5			540.2	538.9		227.55			274.675	235.35
	337.725			499.9	330.9		280.2			539.875	538.575		222.025			274.675	209.35
	334.475			499.575	330.25		277.275			539.875	537.925		219.425			274.675	206.1
	331.55			498.925	329.275		271.75			539.875	537.275		215.85			272.075	205.775
	331.55			498.6	327.975		266.875			539.875	537.275		215.85			271.425	205.45
	330.25			497.3	326.675		266.55			539.55	536.95		211.625			271.1	202.85
	327.975			497.3	326.025		266.55			539.225	535.975		210.325			268.825	201.875
	327.65			496.975	325.05		264.6			538.25	535.65		196.675			268.175	189.85
	324.4			495.35	323.75		262			537.925	535.325		196.025			266.55	182.375
	321.8			494.7	323.75		258.425			537.925	534.675		194.075			264.6	179.125
	320.175			494.375	322.125		258.425			537.6	534.35		189.85			263.95	160.925
	318.875			494.375	320.825		254.525			536.95	534.35		189.2			263.625	160.275
	318.225			494.375	319.525		253.875			536.625	533.7		187.575			259.4	154.75
	314.975			492.425	318.875		253.225			535.65	533.7		183.675			250.95	151.175
	310.1			490.475	318.225		252.25			535	533.7		181.4			250.3	149.55
	309.775			488.525	317.9		252.25			534.675	533.375		180.75			248.35	141.75
	309.45			488.2	315.3		249			534.35	533.05		180.75			247.7	141.425
	306.525			488.2	314.975		248.675			534.025	532.725		179.45			243.475	134.275
	302.95			487.875	314.325		248.35			533.7	532.075		176.85			242.175	133.625
	301.65			487.55	314		247.7			533.375	532.075		170.675			239.9	125.825
	300.675			486.9	313.675		247.05			533.05	531.75		169.05			238.6	125.175
	295.475			486.575	313.35		244.125			532.725	531.1		169.05			238.275	124.85
	294.5			484.3	313.35		243.8			532.725	529.8		168.4			237.625	121.925
	294.5			482.35	311.4		242.825			532.725	529.475		168.075			234.375	119.65
	293.525			482.025	310.75		241.2			531.75	529.15		167.425			233.725	115.425
	293.2			481.05	310.425		240.55			531.1	528.5		167.1			233.725	113.8
	293.2			480.075	309.125		239.25			531.1	528.175		161.9			230.8	103.725
	292.225			479.425	309.125		235.35			530.775	527.85		157.675			228.85	101.45
	292.225			479.425	306.525		235.35			530.775	526.875		154.75			228.525	94.95
	290.925			479.1	305.875		234.375			530.775	526.875		154.425			228.2	94.3
	288.975			476.175	305.225		232.75			530.125	526.55		154.425			227.55	93.65
	288.325			476.175	303.6		230.15			529.8	526.225		153.775			226.25	89.1
	287.675			475.2	303.275		229.5			529.475	526.225		151.825			224.3
	287.025			474.875	302.625		225.925			528.825	525.9		149.225			218.125
	284.75			473.9	302.3		224.625			527.2	525.575		148.25			214.55
	283.45			473.575	301.975		224.3			526.875	525.575		134.6			210.65
	282.8			473.575	301		223.975			526.55	525.25		128.75			209.35
	281.5			473.25	300.35		222.35			525.9	524.925		121.6			208.375
	275.975			472.925	300.35		222.025			525.575	524.6		120.95			206.425
	275.325			471.95	299.7		220.725			525.25	524.275		116.075			206.1
	272.725			471.625	299.375		220.725			524.925	522.975		113.8			205.45
	270.45			470	299.375		216.825			524.275	522.65		110.55			204.15
	270.125			468.7	298.4		216.175			523.95	522.65		103.075			202.85
	269.8			468.7	297.425		213.25			523.95	522.325		99.825			197.325
	266.875			467.4	297.425		209.675			523.95	522.325		99.5			196.675
	264.925			466.1	297.1		208.7			523.95	522		95.6			196.025
	263.3			465.125	296.45		207.075			523.95	522		95.275			193.1
	262			465.125	294.175		206.75			523.95	521.35		92.025			191.8
	261.025			463.175	293.525		205.45			523.3	521.025		87.8			187.25
	260.05			462.525	292.225		205.125			522.65	520.7					187.25
	260.05			461.875	291.25		204.475			522.65	520.05					186.925
	258.1			461.225	288		204.15			522	519.725					186.6
	253.875			461.225	286.375		201.225			522	519.4					185.95
	253.225			460.9	286.05		198.625			522	519.4					185.3
	252.25			460.575	286.05		195.375			520.375	519.4					183.025
	251.925			460.25	285.4		193.75			520.375	519.075					182.05
	249.975			459.275	284.1		191.8			520.375	519.075					181.725
	248.025			456.675	283.45		184			520.375	518.75					180.425
	246.725			455.7	283.125		183.35			520.05	518.75					179.775
	241.2			455.05	282.8		182.375			519.725	517.775					177.5
	240.875			454.075	282.475		176.2			518.75	517.45					177.175
	238.275			453.75	282.15		172.3			518.75	517.125					176.2
	237.3			450.175	281.5		164.5			517.775	516.8					171.65
	235.675			450.175	281.175		162.225			517.775	516.475					171.325
	235.675			449.525	280.525		160.6			516.475	516.475					169.7
	234.375			448.875	279.55		156.7			515.825	515.825					166.45
	233.725			448.875	278.9		154.75			515.825	515.825					166.45
	233.725			448.225	277.275		153.45			515.5	515.825					166.125
	232.75			448.225	276.625		152.475			514.85	514.85					164.175
	231.45			442.7	276.3		152.475			514.2	514.525					163.85
	230.8			442.05	276.3		152.15			514.2	514.2					160.925
	230.8			441.4	275.325		151.825			513.875	514.2					159.625
	230.475			441.075	274.675		151.175			513.875	512.9					156.05
	228.525			440.425	274.35		150.2			512.9	512.25					155.725
	223.325			439.775	273.05		146.625			512.575	511.6					155.075
	220.075			437.825	271.75		142.725			512.25	511.275					154.425
	219.75			437.825	271.75		141.75			511.925	510.95					153.775
	218.775			436.85	271.425		140.45			511.925	510.625					153.775
	218.775			434.9	271.425		137.525			511.275	510.625					152.8
	216.175			434.25	270.775		135.575			511.275	510.3					151.825
	213.575			432.3	270.125		130.7			510.625	510.3					150.85
	213.25			431	269.8		127.45			510.625	509.975					148.9
	211.3			431	269.475		126.475			510.3	509.975					148.25
	210.975			429.375	269.475		124.525			510.3	509.65					147.6
	210.65			428.4	268.825		122.575			509.65	509.65					146.95
	210.325			428.4	268.5		121.275			509.65	509.325					146.95
	206.75			428.075	268.175		118.35			509.65	509.325					145.975
	206.75			427.75	266.875		116.725			509.325	509.325					145
	204.15			425.8	266.225		116.075			509	509.325					144.675
	201.875			425.15	266.225		114.125			508.025	508.675					143.7
	199.925			423.525	266.225		111.2			507.375	508.35					141.75
	199.925			423.525	266.225		107.95			507.375	508.025					141.75
	199.275			422.225	265.25		107.625			507.05	507.375					140.125
	198.95			421.25	264.6		103.075			506.725	507.375					139.15
	198.95			420.275	263.95		101.125			506.725	507.05					138.175
	198.625			420.275	263.3		98.525			506.075	506.4					136.55
	198.625			419.3	262.325		96.25			504.45	505.1					136.55
	198.3			416.05	261.675		94.625			503.15	505.1					132.65
	197.975			416.05	261.35		91.375			502.825	504.45					132
	196.025			415.725	261.35		88.125			502.175	504.125					131.675
	194.075			415.075	260.7		85.85			501.525	503.8					130.7
	192.45			412.475	260.375		85.85			501.2	503.8					130.375
	190.825			412.475	260.05		85.525			501.2	503.475					129.4
	189.2			412.15	260.05		85.2			500.875	502.825					129.4
	183.675			411.175	260.05		81.95			500.225	502.825					128.75
	183.025			410.525	259.075		81.3			499.25	502.5					128.1
	182.375			409.225	258.75		80.975			498.925	502.175					128.1
	181.725			406.95	258.425		80.65			498.925	502.175					127.125
	181.4			405.975	257.45					498.6	501.85					123.875
	181.075			405.325	255.175					497.95	500.875					122.9
	179.775			404.675	254.85					497.625	500.55					122.9
	178.8			404.675	254.525					497.3	500.55					121.925
	178.475			404.35	252.9					496.65	500.225					121.275
	178.475			404.35	252.25					495.675	499.9					120.625
	175.55			403.375	251.925					495.35	499.9					119.65
	172.625			402.725	251.925					494.7	499.9					118.675
	160.925			402.725	251.6					494.7	499.9					118.025
	158.65			402.075	251.275					494.375	499.575					117.375
	158			400.45	250.95					494.375	499.575					117.05
	154.1			399.8	250.625					493.725	499.25					116.725
	152.475			399.15	249.325					493.075	499.25					114.125
	152.475			398.5	248.675					492.425	499.25					112.825
	151.825			397.525	248.35					492.425	498.925					111.85
	150.2			397.525	247.05					492.1	497.95					110.225
	149.875			397.2	246.075					491.775	497.95					109.9
	149.55			395.9	245.425					491.775	497.95					108.6
	149.225			395.25	244.125					491.775	497.95					108.6
	146.3			394.925	243.475					491.775	497.625					108.6
	145.975			394.6	242.825					491.45	497.625					107.95
	145.65			393.3	242.5					490.475	496.975					107.625
	145.325			392.325	242.5					490.15	496.975					107.3
	145			390.375	242.5					490.15	496.325					106.65
	143.7			389.4	241.85					487.55	495.675					106
	142.075			389.075	240.875					486.575	495.675					104.05
	141.425			388.75	240.875					486.25	495.35					103.075
	140.45			387.45	240.225					486.25	495.35					102.425
	138.825			386.8	240.225					485.925	494.375					102.1
	138.5			386.15	239.9					485.6	494.05					100.15
	138.175			384.85	239.575					485.275	494.05					100.15
	137.85			384.525	239.575					484.95	494.05					98.85
	136.875			383.875	238.925					484.625	493.725					98.525
	134.6			383.225	238.925					484.625	493.725					97.55
	132.975			382.9	238.275					483.975	493.725					96.575
	132.325			382.575	238.275					483.65	493.725					95.275
	131.35			382.25	237.95					483.325	493.4					93.325
	128.75			382.25	237.625					482.675	493.4					92.35
	128.75			381.925	237.625					481.7	493.075					91.375
	128.425			381.6	237.625					481.7	492.75					89.75
	127.775			380.95	236.975					481.7	491.775					87.8
	126.8			380.625	236.65					481.05	491.45					81.95
	125.5			380.3	235.675					479.425	491.45					81.3
	125.175			379.975	235.35					479.425	491.125					80.65
	125.175			379.65	235.35					477.475	490.8					80.65
	125.175			379.65	235.025					477.15	489.825
	123.875			378.025	234.05					476.825	489.5
	123.55			378.025	233.4					476.5	489.5
	120.625			377.7	233.075					476.5	489.175
	119.975			377.7	231.775					476.5	489.175
	119.325			377.375	231.775					476.175	488.85
	117.7			377.05	230.15					476.175	488.85
	117.375			376.725	230.15					475.525	488.85
	117.05			376.4	229.825					475.2	488.85
	116.4			374.125	229.825					475.2	488.2
	116.075			374.125	229.825					473.25	487.875
	113.8			372.825	229.5					473.25	487.875
	113.475			372.825	229.5					472.6	487.55
	111.85			371.525	227.55					471.95	487.225
	109.25			371.2	226.9					471.625	486.9
	106.325			370.875	226.575					471.3	486.9
	106			369.575	226.25					471.3	486.25
	105.35			366.325	225.6					471.3	485.925
	105.35			366.325	225.275					470.975	485.275
	100.475			366	223.975					470.65	485.275
	97.875			366	223.65					470.325	485.275
	97.55			365.35	223.325					470.325	485.275
	95.6			365.35	222.35					470	484.95
	82.6			365.025	221.7					470	484.95
	80.65			364.375	221.05					470	484.95
				364.05	220.725					469.35	484.95
				364.05	220.075					468.375	484.95
				363.725	219.75					467.725	484.625
				362.425	219.425					466.75	483.975
				361.45	219.1					466.75	483.65
				360.8	218.45					465.125	483.325
				359.5	218.45					465.125	483.325
				359.175	218.125					465.125	483
				356.9	218.125					465.125	482.35
				353.65	217.475					464.8	482.35
				353.325	216.825					464.8	482.025
				353	216.825					464.15	482.025
				353	216.5					463.825	481.7
				352.35	216.5					463.5	481.375
				352.025	216.175					463.5	481.375
				351.7	216.175					463.175	481.05
				351.375	215.2					463.175	480.725
				351.05	214.55					462.85	480.4
				350.725	214.225					461.55	480.4
				350.075	214.225					460.575	480.075
				349.425	213.575					460.25	480.075
				347.15	213.575					459.925	480.075
				346.5	213.25					459.6	480.075
				346.5	212.925					459.275	479.75
				345.525	212.6					459.275	479.75
				344.55	211.95					459.275	479.75
				343.9	210.975					458.3	479.75
				343.9	210.975					457.975	479.425
				343.25	210					457.975	479.1
				343.25	209.35					457.65	478.45
				342.6	209.025					457.65	478.45
				342.275	209.025					457.325	478.45
				342.275	208.375					457	478.45
				340.975	208.05					455.7	478.45
				340.325	207.725					455.375	477.475
				340.325	207.4					455.05	477.15
				339.675	207.075					454.075	476.825
				338.7	207.075					454.075	476.5
				338.375	206.75					453.75	476.5
				338.05	206.75					452.775	476.175
				337.4	206.75					452.775	475.85
				337.4	205.775					452.775	475.85
				335.775	205.45					451.8	475.525
				335.125	205.125					450.175	475.2
				335.125	204.8					449.2	474.55
				334.8	204.8					449.2	474.225
				333.825	204.15					448.55	474.225
				333.175	204.15					448.225	474.225
				333.175	203.175					447.25	473.9
				331.875	202.525					446.275	473.575
				330.9	202.2					446.275	473.575
				330.575	202.2					446.275	473.575
				330.25	202.2					446.275	473.25
				329.275	201.225					445.625	473.25
				327	201.225					445.625	472.6
				326.675	200.25					445.625	472.275
				326.35	199.925					445.3	472.275
				325.375	199.275					445.3	471.95
				323.75	198.95					444.65	471.95
				323.1	197.975					443.675	471.625
				322.45	197.975					443.675	471.625
				321.8	197.65					443.35	471.625
				320.825	197					443.35	471.625
				319.85	196.675					443.025	471.625
				317.9	196.675					442.375	471.3
				317.9	196.35					442.375	471.3
				316.6	196.35					442.05	470
				315.95	196.35					442.05	469.675
				313.675	196.35					441.725	469.675
				313.675	196.35					441.4	469.35
				312.7	195.7					441.075	468.375
				312.375	195.375					440.75	468.05
				312.05	195.05					440.75	466.75
				312.05	195.05					440.425	466.75
				311.725	194.4					440.425	466.75
				311.075	194.075					440.425	466.425
				311.075	193.1					439.125	466.425
				311.075	192.125					439.125	466.1
				310.1	191.8					438.15	465.775
				310.1	191.8					437.825	465.45
				310.1	191.15					436.525	464.8
				308.15	191.15					436.2	464.8
				307.825	191.15					435.55	463.825
				307.825	190.5					435.225	463.5
				307.5	190.175					435.225	463.175
				307.175	189.525					434.9	462.85
				306.2	189.525					434.25	462.2
				306.2	189.2					433.925	461.875
				305.875	189.2					433.925	461.875
				304.575	188.875					433.925	461.225
				303.6	188.55					433.6	460.9
				303.275	186.6					431.975	460.9
				302.95	186.275					431.975	460.9
				302.95	186.275					431.325	460.25
				301.975	185.625					431.325	460.25
				301.65	185.3					431.325	460.25
				301.325	184.65					431	459.925
				301.325	184.65					430.675	459.6
				301.325	184.325					430.35	459.275
				301.325	183.35					429.375	459.275
				299.375	183.35					429.05	458.3
				298.075	182.7					428.4	458.3
				298.075	182.05					428.4	457.65
				297.1	182.05					428.4	457.325
				297.1	181.725					428.4	457
				296.775	181.075					428.075	456.675
				296.45	181.075					427.75	456.675
				296.45	181.075					427.75	456.35
				296.125	180.75					427.1	456.35
				295.8	180.75					426.775	456.35
				295.475	180.425					426.45	455.05
				295.15	179.125					426.125	454.725
				292.875	178.8					426.125	453.425
				292.875	178.8					425.15	453.425
				292.55	177.825					425.15	452.775
				292.55	177.5					424.5	452.775
				291.9	177.175					424.175	452.775
				290.925	176.85					423.85	452.775
				289.625	176.525					423.85	452.45
				288.325	176.525					423.525	452.125
				288	175.875					422.55	452.125
				288	175.55					422.55	451.8
				288	174.575					422.225	451.475
				286.7	174.25					421.575	451.475
				285.725	173.925					421.25	451.475
				285.725	173.925					421.25	451.15
				284.425	173.6					419.95	451.15
				283.775	173.275					419.95	451.15
				283.775	172.95					419.95	451.15
				283.775	172.625					419.3	451.15
				282.15	172.3					418.975	450.825
				280.525	172.3					418.975	450.5
				280.525	171.65					418.975	450.175
				279.225	171.325					418	450.175
				278.575	171					417.675	449.85
				278.25	170.675					417.675	449.525
				277.6	170.35					416.7	449.2
				277.6	170.025					416.7	449.2
				277.6	170.025					416.375	448.875
				277.275	169.375					416.05	448.875
				277.275	169.05					415.725	448.875
				274.025	168.725					415.4	448.55
				273.375	168.4					415.4	448.55
				272.4	168.075					415.075	448.225
				271.1	167.75					415.075	447.9
				270.125	167.425					414.425	447.9
				270.125	167.1					413.45	447.575
				269.8	167.1					413.45	447.25
				269.15	166.775					413.45	447.25
				268.175	166.45					413.125	446.925
				268.175	166.125					412.475	446.925
				267.85	165.475					412.475	446.925
				266.875	165.15					412.475	446.925
				266.875	165.15					412.475	446.925
				266.55	164.5					412.15	446.925
				265.9	164.5					412.15	446.275
				265.25	164.5					411.825	446.275
				263.625	164.175					411.825	445.95
				262.975	164.175					411.825	445.95
				262.975	163.85					411.5	444.975
				262.65	163.2					411.5	444.975
				262.65	162.225					411.175	444
				262	162.225					411.175	444
				261.35	161.9					410.525	443.675
				261.025	161.575					410.525	443.35
				260.7	161.575					410.2	443.35
				260.375	161.25					410.2	442.7
				259.075	161.25					409.875	442.7
				259.075	160.6					409.225	442.375
				259.075	160.275					408.9	442.375
				259.075	159.95					408.575	442.05
				258.75	159.625					408.575	442.05
				258.425	158.975					408.25	441.725
				258.1	158.65					408.25	441.4
				257.775	157.35					407.6	441.4
				257.775	157.025					407.6	441.4
				255.5	157.025					406.3	441.075
				254.525	157.025					405.975	440.425
				254.2	156.7					405.975	440.425
				252.575	156.05					405.65	440.425
				252.575	155.725					405.325	440.1
				252.25	155.4					404.675	440.1
				252.25	155.075					404.025	439.775
				249.975	154.425					403.7	439.775
				249.975	154.425					403.7	438.8
				249.975	154.1					403.05	438.8
				249.65	153.775					403.05	438.8
				249	153.45					402.4	438.475
				249	153.45					401.425	437.825
				249	152.8					401.425	437.825
				249	152.475					401.425	437.175
				248.675	152.15					401.1	437.175
				248.35	151.825					401.1	437.175
				247.7	151.175					400.775	437.175
				246.4	150.85					400.45	436.85
				246.075	150.85					400.45	436.2
				246.075	149.55					399.8	436.2
				245.425	148.9					399.475	436.2
				245.1	148.575					399.15	435.875
				245.1	148.575					399.15	435.55
				243.8	148.25					398.825	435.225
				243.8	148.25					398.5	435.225
				243.8	147.6					398.175	434.9
				243.475	145.65					398.175	434.9
				242.5	145.325					397.2	434.25
				242.175	144.675					397.2	433.925
				241.85	144.35					397.2	433.6
				241.2	144.35					397.2	433.6
				241.2	144.025					397.2	432.95
				240.875	142.725					396.875	432.625
				240.875	142.4					396.225	432.3
				240.225	142.4					395.9	431.975
				239.9	142.4					395.575	431.65
				239.9	142.075					395.575	431.325
				239.9	141.425					395.575	431.325
				239.575	141.425					395.25	431.325
				238.6	141.1					394.6	431.325
				238.6	140.775					394.275	431
				238.6	140.775					394.275	431
				238.275	140.775					393.95	431
				238.275	140.45					393.95	430.025
				238.275	140.125					393.95	430.025
				237.95	139.475					393.625	429.7
				237.95	139.15					392.975	429.375
				237.95	138.825					392.975	428.725
				237.95	138.5					392.65	428.4
				237.625	137.85					392	428.4
				237.625	137.525					392	428.4
				236.975	137.2					392	428.075
				236.975	136.875					391.675	428.075
				236.65	136.55					391.35	427.75
				236	136.55					391.025	427.425
				236	135.25					391.025	426.45
				235.675	134.6					391.025	426.45
				235.025	134.6					391.025	426.45
				234.375	133.95					389.725	426.125
				233.075	133.625					389.4	426.125
				232.425	132.975					388.75	425.8
				231.775	132.975					388.425	425.8
				231.775	132.975					388.1	425.475
				231.45	132					388.1	425.475
				231.45	131.675					387.775	425.15
				231.125	131.35					387.775	425.15
				230.475	130.375					387.775	424.175
				230.15	130.375					387.775	424.175
				229.825	129.725					386.8	424.175
				229.5	129.075					386.15	423.525
				228.525	128.425					385.825	423.2
				227.875	128.425					385.825	422.875
				227.875	128.1					384.525	422.55
				225.6	127.125					384.525	422.55
				225.275	126.8					384.2	422.55
				224.95	126.475					382.9	422.225
				224.625	125.825					382.575	421.25
				224.3	125.825					382.25	421.25
				223.975	125.825					381.275	420.275
				223	125.5					380.95	420.275
				222.35	125.175					380.95	419.95
				222.35	124.85					380.625	419.95
				221.375	123.875					380.625	419.625
				219.75	122.9					380.625	419.3
				219.1	122.575					380.625	418.975
				218.775	121.275					379.65	418.975
				218.45	121.275					379.325	418.65
				218.125	119.975					379.325	418.65
				217.8	119.65					379	418.65
				217.15	119.325					378.675	418.325
				216.825	118.675					378.35	417.675
				216.5	117.7					378.35	417.675
				216.5	117.7					378.35	417.35
				216.175	116.725					378.025	417.025
				215.2	116.075					377.7	416.7
				215.2	116.075					377.375	416.375
				214.55	115.75					377.375	416.05
				214.225	115.75					377.05	416.05
				214.225	115.425					377.05	415.725
				213.9	115.425					376.725	415.4
				213.575	114.45					376.4	415.075
				213.25	113.8					376.075	415.075
				213.25	111.85					375.425	414.75
				212.6	111.85					375.1	414.75
				212.6	111.525					375.1	414.1
				211.625	111.525					374.45	413.775
				211.625	111.525					373.475	413.45
				210.975	111.2					373.15	413.125
				210.975	110.55					373.15	412.8
				210.65	110.55					373.15	412.475
				210	110.55					373.15	412.475
				208.05	108.275					372.175	412.475
				207.725	107.3					372.175	412.15
				207.725	106					371.85	412.15
				207.4	104.375					371.525	411.825
				206.1	103.4					371.525	411.825
				205.775	103.4					371.525	411.5
				205.45	102.75					370.875	411.175
				205.45	102.425					370.875	410.525
				205.125	101.775					370.225	410.525
				205.125	96.25					370.225	410.525
				204.15	95.925					370.225	410.525
				204.15	90.4					369.9	410.2
				203.5	90.075					369.575	410.2
				202.2	89.75					369.25	410.2
				202.2	88.775					368.925	409.875
				201.875	87.8					368.925	409.225
				201.875	87.475					368.6	408.9
				201.225	87.15					367.625	408.575
				201.225	84.55					367.625	408.25
				200.9	83.9					367.625	408.25
				200.9	83.575					367.3	408.25
				200.9	80.65					367.3	407.6
				200.575						366.975	407.6
				200.575						366.975	407.275
				200.25						366.325	406.625
				199.925						366.325	406.3
				199.6						366.325	405.975
				198.625						366.325	405.975
				198.3						365.35	405.325
				197.975						365.025	405.325
				197.325						365.025	405
				197.325						364.7	405
				197.325						364.7	405
				197						364.7	405
				196.675						364.375	404.675
				196.35						364.375	404.025
				196.025						364.05	404.025
				195.7						364.05	404.025
				195.375						364.05	404.025
				195.05						363.725	403.7
				195.05						363.4	403.375
				194.4						363.4	403.375
				193.75						362.75	402.725
				193.425						362.425	402.725
				193.1						362.1	402.4
				193.1						362.1	402.4
				193.1						361.775	402.075
				192.45						361.775	402.075
				192.45						361.775	402.075
				192.45						361.45	401.75
				192.125						361.45	401.425
				189.85						361.125	401.425
				188.875						360.8	401.425
				188.55						360.475	401.1
				188.225						360.475	401.1
				187.9						360.15	400.775
				187.25						359.825	400.775
				186.6						358.85	400.775
				185.95						358.85	400.775
				185.95						358.85	400.45
				185.95						357.875	400.45
				185.625						357.55	400.125
				185.3						357.55	400.125
				184.975						357.55	399.8
				184.975						357.225	399.8
				184.65						356.9	399.8
				184						356.575	399.8
				183.675						356.25	399.475
				183.35						355.925	399.15
				182.7						355.925	398.825
				182.375						355.925	398.175
				182.05						355.925	398.175
				182.05						355.6	398.175
				181.725						355.6	397.85
				180.425						354.625	397.85
				180.425						354.3	397.85
				180.1						353.975	397.85
				179.775						353.975	397.525
				179.45						353	397.525
				179.45						352.675	397.525
				178.475						352.025	397.2
				178.475						352.025	396.875
				178.15						351.7	396.875
				177.825						350.725	396.875
				177.175						350.725	396.875
				176.525						350.725	396.875
				176.525						350.4	396.55
				176.2						350.4	396.225
				176.2						350.075	395.9
				176.2						349.75	395.575
				175.875						349.425	395.25
				175.55						349.1	394.6
				175.55						349.1	394.275
				174.575						348.125	394.275
				173.925						348.125	394.275
				173.925						348.125	393.95
				173.275						347.475	393.95
				172.95						347.15	393.625
				172.3						347.15	393.625
				172.3						347.15	393.625
				171.975						346.175	393.3
				171.65						345.525	392.975
				171.325						345.2	392.975
				171						344.55	392.65
				170.675						344.55	392
				170.675						344.55	391.675
				170.025						344.55	391.675
				170.025						344.225	391.35
				170.025						343.9	391.025
				169.7						343.9	391.025
				167.425						343.575	391.025
				167.1						343.25	391.025
				166.45						343.25	391.025
				165.8						343.25	390.7
				165.8						342.925	390.375
				165.15						342.275	390.375
				163.2						342.275	390.05
				162.875						342.275	389.725
				162.875						341.95	389.725
				161.25						341.95	389.725
				161.25						341.625	389.725
				161.25						341.3	389.4
				161.25						341.3	389.4
				160.275						340.975	389.4
				160.275						340.975	389.4
				160.275						340.65	389.075
				158.975						340.325	388.75
				158.325						340.325	387.775
				158						340.325	387.45
				157.35						340.325	387.45
				157.025						340	387.125
				156.7						340	387.125
				156.375						340	387.125
				156.375						339.675	386.8
				156.375						339.025	386.8
				156.05						339.025	386.475
				156.05						338.375	386.15
				155.725						338.375	386.15
				154.425						338.375	385.825
				154.1						338.375	385.5
				154.1						338.375	385.175
				153.775						338.05	384.2
				153.775						337.725	384.2
				153.45						337.4	383.875
				152.475						337.4	383.55
				152.15						337.075	383.55
				151.5						336.1	382.575
				151.175						336.1	382.575
				150.2						336.1	382.575
				149.875						336.1	382.25
				149.875						335.775	382.25
				149.875						335.775	382.25
				149.55						335.775	381.925
				149.55						335.125	381.925
				149.55						335.125	381.275
				148.9						335.125	381.275
				148.575						334.15	380.95
				148.25						333.5	380.95
				148.25						333.5	380.625
				147.275						333.175	380.625
				147.275						332.85	380.625
				146.95						332.85	380.625
				146.625						332.85	380.3
				146.625						332.525	380.3
				146.3						332.2	380.3
				146.3						331.875	379.975
				146.3						331.55	379.325
				146.3						331.55	379.325
				145.325						331.225	379.325
				145						331.225	379
				145						330.9	378.675
				144.35						330.9	378.025
				144.025						330.9	377.7
				144.025						330.25	377.7
				143.7						329.925	377.7
				143.05						329.925	377.375
				142.725						329.925	377.05
				141.75						329.275	376.725
				141.425						329.275	376.725
				140.45						329.275	376.4
				140.125						328.3	376.4
				139.15						327.975	375.75
				138.5						327.975	375.425
				137.85						327.65	374.775
				136.55						327.325	374.45
				135.575						327.325	374.45
				135.25						327.325	374.125
				135.25						326.675	374.125
				134.6						326.35	373.8
				134.6						326.025	373.475
				134.6						326.025	373.475
				134.275						326.025	373.15
				133.3						325.7	373.15
				132.975						325.375	373.15
				132.975						325.375	372.825
				132.65						324.725	372.175
				131.675						324.725	372.175
				131.675						324.725	372.175
				131.025						324.4	372.175
				131.025						323.75	371.85
				130.375						323.1	371.525
				130.05						323.1	371.525
				130.05						323.1	371.525
				129.725						323.1	371.525
				127.45						322.775	371.525
				127.45						322.775	371.2
				127.45						322.775	371.2
				126.15						322.775	371.2
				125.825						322.125	370.875
				125.825						322.125	370.875
				125.5						322.125	370.875
				125.5						321.8	370.55
				125.5						321.475	370.225
				124.2						321.15	370.225
				123.55						320.825	370.225
				123.225						320.175	369.9
				122.25						319.85	369.9
				121.275						319.85	369.25
				120.95						319.525	369.25
				120.3						319.525	368.925
				119.325						319.525	368.6
				118.025						319.2	368.275
				118.025						319.2	368.275
				117.375						319.2	368.275
				116.4						318.875	367.95
				116.075						318.55	367.625
				115.75						318.55	367.3
				115.1						318.55	367.3
				114.775						318.225	366.975
				114.125						318.225	366.65
				112.825						318.225	366.65
				112.175						317.9	366.325
				111.85						317.25	366.325
				111.525						317.25	366
				110.875						317.25	365.675
				110.55						317.25	365.675
				110.225						316.925	365.35
				109.575						316.925	365.35
				107.95						316.925	365.35
				107.95						316.6	365.35
				107.625						316.275	365.025
				107.3						316.275	365.025
				104.7						315.95	364.7
				103.725						315.625	364.375
				103.4						315.625	364.375
				101.125						315.3	364.375
				101.125						314.975	364.05
				100.8						314.975	364.05
				99.5						314.65	364.05
				99.175						314.65	364.05
				98.2						314.65	364.05
				96.575						314.325	364.05
				96.25						314.325	364.05
				93.65						314.325	363.725
				93						314.325	363.725
				91.7						314.325	363.4
				91.05						314	363.4
				90.725						314	363.4
				89.425						314	363.075
				89.425						312.375	362.75
				89.425						312.05	362.75
				87.8						311.725	362.425
				87.8						311.725	362.425
				87.8						310.75	362.1
				87.475						310.75	362.1
				87.15						310.425	362.1
				86.825						310.1	361.775
				86.5						310.1	361.775
				84.55						309.775	361.775
				83.25						309.775	361.45
				82.275						309.775	361.125
				81.95						309.45	361.125
				81.95						309.45	360.8
				81.95						309.125	360.475
				81.3						308.8	360.15
										308.8	360.15
										307.825	359.825
										307.825	359.825
										307.825	359.825
										307.175	359.5
										306.85	359.175
										306.525	359.175
										306.525	359.175
										306.2	358.85
										306.2	358.525
										305.55	358.2
										305.225	358.2
										304.25	358.2
										303.925	358.2
										303.925	357.875
										303.6	357.55
										303.275	357.225
										303.275	357.225
										303.275	357.225
										303.275	357.225
										302.625	356.9
										302.3	356.9
										302.3	356.575
										301.975	356.25
										301.975	356.25
										301.65	356.25
										300.675	355.925
										299.7	355.925
										299.7	355.925
										299.05	355.6
										298.725	355.275
										298.725	354.95
										298.4	354.95
										298.4	354.95
										298.4	354.95
										298.4	354.625
										297.75	354.625
										297.425	354.625
										297.1	354.625
										296.775	354.3
										296.775	354.3
										296.45	354.3
										296.45	353.65
										295.8	353.65
										295.15	353.325
										295.15	353
										294.825	353
										294.175	352.675
										293.525	352.675
										293.2	352.35
										292.875	352.025
										292.875	352.025
										292.225	352.025
										291.9	351.7
										291.9	351.375
										291.9	351.375
										291.575	351.05
										291.25	351.05
										290.6	351.05
										290.6	350.4
										290.6	350.4
										290.6	350.075
										289.3	350.075
										289.3	349.75
										288.975	349.75
										288.975	349.75
										288.65	349.425
										288.325	349.1
										287.675	349.1
										287.35	348.775
										287.025	348.45
										287.025	348.45
										287.025	348.45
										286.375	348.125
										286.375	348.125
										286.375	347.8
										285.4	347.8
										284.75	347.475
										284.75	347.15
										284.425	346.825
										284.425	346.825
										284.1	346.5
										284.1	346.5
										283.775	346.5
										283.45	346.5
										283.45	346.5
										283.125	345.85
										282.8	345.85
										282.8	345.85
										282.15	345.85
										282.15	345.525
										281.825	344.875
										280.85	344.875
										280.85	344.875
										280.525	344.875
										280.525	344.55
										280.2	344.55
										280.2	344.225
										279.875	344.225
										279.55	343.9
										278.9	343.9
										278.575	343.575
										278.25	343.575
										277.925	343.25
										277.925	343.25
										277.925	342.925
										277.275	342.925
										276.95	342.6
										276.3	342.6
										275.975	342.6
										275.65	342.6
										275.65	342.6
										275.325	342.275
										275	342.275
										275	342.275
										275	341.95
										275	341.625
										274.675	341.3
										274.675	341.3
										274.675	340.65
										274.675	340.325
										274.35	340.325
										274.35	340
										273.7	340
										273.7	340
										273.7	340
										273.7	340
										273.375	339.35
										273.375	339.025
										273.05	339.025
										272.4	339.025
										272.075	338.7
										271.75	338.7
										271.75	338.375
										271.75	338.375
										271.75	338.05
										271.75	338.05
										271.425	338.05
										270.775	338.05
										270.45	337.725
										270.45	337.4
										270.125	337.075
										270.125	337.075
										270.125	336.75
										270.125	336.75
										269.475	336.75
										269.475	336.425
										268.825	336.425
										268.175	336.425
										268.175	336.425
										267.85	336.1
										267.85	336.1
										267.85	336.1
										267.525	335.775
										267.525	335.775
										267.525	335.125
										267.525	335.125
										267.2	334.8
										266.875	334.8
										266.875	334.8
										266.55	334.8
										266.55	334.8
										266.225	334.8
										266.225	334.475
										266.225	334.475
										265.9	334.15
										265.9	334.15
										265.9	334.15
										265.9	334.15
										265.575	334.15
										265.25	333.825
										264.925	333.5
										264.275	333.5
										263.95	333.5
										263.625	333.175
										263.3	333.175
										263.3	333.175
										263.3	332.85
										263.3	332.85
										263.3	332.85
										262.975	332.2
										262.975	331.875
										262.975	331.875
										262.65	331.875
										262.325	331.875
										262.325	331.875
										262	331.55
										261.675	331.55
										261.025	331.55
										260.7	331.55
										260.7	331.55
										260.375	331.55
										260.05	330.9
										259.725	330.9
										259.725	330.9
										259.725	330.9
										258.75	330.9
										258.75	330.575
										258.75	330.575
										258.75	330.25
										258.425	330.25
										258.1	329.925
										258.1	329.925
										258.1	329.6
										258.1	329.275
										258.1	329.275
										257.775	328.95
										257.45	328.95
										257.125	328.625
										256.8	328.625
										256.8	328.625
										256.8	328.3
										256.475	328.3
										256.475	327.975
										256.15	327.975
										254.85	327.65
										254.85	327.65
										254.525	327.65
										253.875	327.325
										253.875	327.325
										253.875	327.325
										253.225	327
										252.25	327
										251.6	326.675
										251.275	326.675
										251.275	326.675
										250.625	326.675
										250.3	326.675
										250.3	326.35
										249.975	326.35
										249.65	326.35
										249.65	326.025
										249.65	325.7
										249.65	325.7
										249	325.05
										249	325.05
										248.35	324.4
										248.35	324.075
										248.025	324.075
										248.025	324.075
										247.7	322.775
										247.7	322.775
										247.7	322.45
										247.375	322.45
										247.05	322.125
										246.725	322.125
										246.725	321.8
										246.4	321.15
										246.4	321.15
										246.075	321.15
										245.425	320.825
										245.425	320.175
										244.775	320.175
										244.45	319.85
										244.45	319.85
										243.8	319.85
										243.8	319.85
										243.475	319.525
										243.475	319.525
										243.475	319.2
										243.475	319.2
										243.15	319.2
										243.15	319.2
										243.15	319.2
										242.825	319.2
										242.825	318.55
										242.5	318.55
										242.5	318.55
										241.2	318.225
										240.875	318.225
										240.225	318.225
										240.225	317.9
										239.9	317.9
										239.9	317.575
										239.25	317.25
										239.25	316.925
										238.925	316.925
										238.925	316.925
										238.925	316.925
										238.925	316.6
										238.6	316.6
										238.6	316.6
										237.95	315.95
										237.625	315.625
										237.625	315.3
										237.3	315.3
										237.3	314.975
										237.3	314.975
										237.3	314.65
										237.3	314.65
										237.3	314.325
										236.975	314.325
										236.65	314
										236.325	313.675
										236	313.675
										235.35	313.35
										235.025	313.35
										234.7	313.35
										234.7	313.025
										233.725	313.025
										233.4	312.7
										233.075	312.375
										233.075	312.375
										232.1	312.05
										231.775	312.05
										231.775	311.725
										231.775	311.725
										231.775	311.725
										231.125	311.725
										231.125	311.725
										229.5	311.4
										229.175	310.75
										228.525	310.425
										228.525	310.1
										228.2	310.1
										227.875	309.775
										227.225	309.775
										226.9	309.775
										226.9	309.775
										226.9	309.775
										226.9	309.775
										226.575	309.775
										226.25	309.775
										226.25	309.45
										225.6	309.45
										225.6	309.45
										225.6	309.125
										225.275	308.475
										225.275	308.15
										224.95	308.15
										224.625	308.15
										224.625	307.825
										224.625	307.5
										224.3	307.5
										223.975	307.175
										223.65	307.175
										223.325	307.175
										223	306.85
										223	306.85
										223	306.85
										223	306.85
										223	306.85
										222.675	306.2
										222.35	305.875
										222.35	305.875
										222.025	305.875
										222.025	305.55
										221.375	305.55
										221.375	305.225
										221.375	304.9
										221.05	304.9
										220.725	304.9
										220.4	304.575
										220.4	304.575
										220.075	304.575
										219.425	304.575
										219.425	304.575
										219.1	304.25
										219.1	304.25
										218.775	304.25
										218.775	303.925
										218.45	303.925
										218.45	303.925
										217.475	303.6
										215.85	303.6
										215.525	303.275
										215.2	303.275
										214.55	303.275
										214.55	302.95
										213.575	302.625
										212.275	302.3
										211.95	302.3
										211.3	302.3
										210.65	302.3
										210.65	302.3
										210.325	301.975
										210.325	301.65
										210	301.65
										209.675	301.325
										209.35	301.325
										209.025	301
										209.025	301
										208.7	300.675
										208.05	300.675
										207.4	300.675
										207.075	300.35
										207.075	300.35
										206.425	300.35
										206.425	300.35
										206.1	300.025
										206.1	299.7
										206.1	299.375
										205.45	299.375
										205.125	299.375
										204.8	299.05
										203.5	298.4
										203.5	298.4
										203.5	298.4
										203.175	298.4
										203.175	298.075
										203.175	298.075
										202.2	298.075
										201.875	298.075
										201.55	297.75
										201.55	297.75
										200.9	297.75
										200.575	297.425
										200.575	297.425
										200.25	297.425
										200.25	297.1
										199.925	297.1
										199.275	297.1
										198.95	296.775
										197.65	296.775
										197.65	296.775
										197.325	296.775
										197	296.45
										196.675	296.125
										196.35	296.125
										196.35	296.125
										195.375	295.8
										195.375	295.475
										195.05	295.475
										195.05	295.15
										194.725	294.825
										194.4	294.825
										194.075	294.825
										194.075	294.825
										193.1	294.825
										193.1	294.5
										192.775	294.5
										192.775	294.5
										191.8	293.525
										191.8	293.525
										191.475	293.525
										190.825	293.525
										190.825	293.525
										190.5	293.525
										190.175	293.2
										189.85	293.2
										189.85	292.875
										189.525	292.875
										188.225	292.55
										188.225	292.55
										187.9	292.55
										187.575	292.55
										187.575	292.55
										187.25	292.225
										187.25	291.9
										186.6	291.9
										186.275	291.25
										186.275	290.925
										185.95	290.925
										185.95	290.925
										185.625	290.275
										185.625	289.95
										185.3	289.625
										185.3	289.625
										184.975	289.3
										184.65	288.975
										184.325	288.975
										184	288.975
										184	288.975
										183.675	288.975
										182.375	288.65
										182.375	288
										181.725	287.675
										180.75	287.35
										180.75	287.35
										180.75	287.025
										180.425	287.025
										180.425	287.025
										179.775	286.7
										179.45	286.7
										179.125	286.375
										178.8	286.05
										178.8	285.4
										178.8	285.4
										178.8	285.075
										177.825	285.075
										177.5	285.075
										177.175	285.075
										176.85	284.75
										176.85	284.75
										176.525	284.75
										174.575	284.75
										174.25	284.425
										174.25	284.425
										173.925	284.425
										173.6	284.425
										172.625	284.1
										171.65	284.1
										171.325	284.1
										171	284.1
										170.675	284.1
										170.675	283.775
										170.35	283.775
										170.35	283.45
										170.025	283.45
										170.025	283.45
										170.025	283.45
										169.7	283.45
										169.7	283.125
										168.4	283.125
										168.4	283.125
										168.4	282.8
										168.075	282.8
										167.75	281.825
										167.75	281.5
										167.425	281.5
										167.425	281.5
										167.425	281.5
										167.425	281.175
										167.1	281.175
										167.1	281.175
										167.1	280.85
										167.1	280.525
										167.1	280.525
										167.1	280.2
										166.775	279.875
										166.775	279.875
										166.775	279.55
										166.775	279.55
										166.45	278.9
										166.45	278.9
										166.125	278.9
										165.8	278.9
										165.8	278.575
										165.475	278.575
										164.5	278.575
										164.5	278.25
										163.525	278.25
										163.525	277.925
										163.525	277.925
										163.525	277.6
										162.225	277.6
										162.225	277.275
										161.9	277.275
										161.25	277.275
										160.925	277.275
										160.925	277.275
										160.925	277.275
										160.6	276.95
										160.6	276.95
										159.625	276.95
										159.625	276.95
										159.625	276.625
										159.3	276.625
										159.3	276.625
										158.975	276.625
										158.975	276.625
										158.65	276.3
										158.65	276.3
										158.325	275.975
										158	275.975
										158	275.975
										158	275.65
										157.025	275.65
										156.05	275.65
										155.725	275.325
										155.4	275.325
										155.4	275.325
										154.75	275
										154.75	275
										154.425	274.675
										154.425	274.35
										154.425	274.35
										154.425	274.35
										154.1	274.025
										153.775	274.025
										153.775	273.7
										153.45	273.7
										153.125	273.7
										153.125	273.375
										152.8	273.375
										151.5	273.375
										151.175	273.05
										151.175	273.05
										151.175	273.05
										150.525	272.725
										150.525	272.725
										149.875	272.4
										149.875	272.4
										149.55	272.4
										149.55	272.075
										149.225	272.075
										148.25	272.075
										148.25	271.75
										147.925	271.75
										147.925	271.75
										147.6	271.425
										147.275	271.425
										146.625	271.425
										145	271.1
										145	271.1
										144.675	271.1
										144.025	271.1
										143.05	271.1
										143.05	270.775
										142.725	270.775
										142.725	270.45
										142.725	270.125
										142.725	270.125
										142.4	269.8
										141.425	269.8
										139.475	269.8
										139.15	269.8
										138.5	269.475
										137.85	269.15
										137.525	269.15
										136.55	269.15
										134.275	269.15
										133.625	268.825
										132	268.825
										132	268.825
										132	268.5
										131.675	268.5
										131.025	268.175
										131.025	267.85
										130.7	267.85
										130.7	267.85
										130.375	267.85
										130.05	267.525
										129.725	267.525
										129.4	267.525
										129.4	267.525
										127.45	267.525
										127.125	267.525
										127.125	267.2
										126.15	267.2
										125.825	266.875
										125.5	266.875
										125.5	266.875
										124.85	266.875
										124.85	266.55
										124.525	266.225
										123.55	266.225
										123.225	266.225
										123.225	266.225
										122.9	265.9
										122.575	265.9
										122.575	265.575
										122.575	264.925
										122.575	264.925
										122.25	264.6
										120.95	264.6
										120.95	264.6
										120.625	264.6
										120.3	264.275
										119.65	264.275
										119.65	263.95
										119.325	263.95
										119.325	263.95
										119.325	263.625
										118.675	263.625
										117.375	263.625
										117.375	263.625
										114.45	263.625
										114.125	263.3
										113.15	262.65
										113.15	262.65
										112.825	262.65
										112.5	262.65
										112.175	262.325
										111.85	262.325
										111.525	262.325
										111.2	262.325
										110.225	262
										109.9	262
										109.25	262
										108.6	261.675
										108.275	261.675
										108.275	261.675
										107.95	261.675
										107.625	261.35
										107.625	261.35
										107.625	261.025
										106.975	261.025
										105.675	261.025
										105.025	260.7
										105.025	260.7
										104.05	260.7
										103.725	260.375
										103.4	260.375
										102.425	260.375
										102.425	260.375
										101.45	260.375
										101.125	260.05
										101.125	260.05
										101.125	260.05
										99.825	260.05
										99.5	259.4
										99.175	259.075
										97.55	259.075
										96.9	259.075
										96.9	258.75
										96.25	258.425
										95.925	258.425
										95.6	258.1
										93.65	258.1
										93.325	258.1
										92.35	257.775
										92.35	257.775
										92.35	257.45
										91.375	257.125
										90.725	257.125
										90.075	257.125
										90.075	256.8
										89.425	256.8
										88.775	256.8
										87.475	256.8
										86.825	256.15
										86.175	256.15
										84.875	256.15
										84.55	256.15
										84.55	256.15
										84.55	256.15
										82.925	255.825
										82.925	255.825
										80.65	255.5
											255.175
											255.175
											255.175
											255.175
											255.175
											254.85
											254.85
											254.85
											254.85
											254.85
											254.85
											254.85
											254.525
											254.525
											254.525
											254.2
											254.2
											253.875
											253.875
											253.875
											253.875
											253.875
											253.55
											253.55
											253.55
											253.55
											253.55
											253.225
											252.9
											252.9
											252.9
											252.575
											252.575
											252.575
											252.25
											251.925
											251.925
											251.925
											251.925
											251.6
											251.6
											251.6
											251.275
											251.275
											251.275
											251.275
											251.275
											250.95
											250.95
											250.95
											250.95
											250.625
											250.625
											250.625
											250.625
											250.3
											249.975
											249.975
											249.975
											249.975
											249.65
											249.65
											249.65
											249.325
											249
											248.675
											248.675
											248.675
											248.675
											248.35
											248.35
											247.7
											247.7
											247.7
											247.7
											247.375
											247.375
											247.375
											247.375
											247.375
											247.05
											247.05
											246.725
											246.4
											246.4
											246.4
											246.4
											246.4
											246.4
											245.75
											245.75
											245.425
											245.1
											245.1
											244.775
											244.775
											244.45
											244.45
											244.125
											244.125
											244.125
											243.8
											243.8
											243.8
											243.8
											243.475
											243.475
											243.475
											243.475
											243.475
											243.15
											243.15
											243.15
											243.15
											242.825
											242.825
											242.825
											242.5
											242.5
											242.175
											242.175
											242.175
											242.175
											241.525
											241.2
											240.875
											240.55
											240.225
											240.225
											240.225
											239.575
											239.25
											239.25
											239.25
											238.925
											238.6
											238.6
											238.6
											238.6
											238.275
											238.275
											237.95
											237.95
											237.625
											237.625
											237.625
											237.3
											237.3
											237.3
											236.975
											236.975
											236.65
											236.65
											236.65
											236.65
											236.65
											236.325
											236.325
											236.325
											236.325
											236
											236
											235.35
											235.35
											235.025
											235.025
											234.7
											234.7
											234.375
											234.375
											234.375
											234.05
											233.725
											233.725
											233.4
											233.4
											233.4
											233.4
											233.4
											233.075
											233.075
											233.075
											232.75
											232.75
											232.425
											232.425
											232.1
											232.1
											232.1
											231.775
											231.775
											231.775
											231.775
											231.45
											231.45
											231.45
											231.125
											231.125
											231.125
											230.8
											230.8
											230.8
											230.8
											230.475
											230.15
											229.825
											229.825
											229.825
											229.825
											229.175
											229.175
											229.175
											228.525
											228.525
											228.525
											228.2
											228.2
											227.875
											227.875
											227.875
											227.875
											227.55
											227.225
											226.9
											226.9
											226.575
											226.575
											226.575
											226.25
											225.925
											225.925
											225.275
											225.275
											224.625
											224.625
											224.3
											224.3
											223.975
											223.975
											223.975
											223.975
											223.975
											223.975
											223.975
											223.65
											223.65
											223.325
											223.325
											223
											222.675
											222.675
											222.35
											222.025
											222.025
											221.7
											221.7
											221.7
											221.375
											221.375
											221.05
											221.05
											221.05
											221.05
											220.725
											220.725
											220.725
											220.725
											220.4
											220.4
											220.075
											220.075
											219.75
											219.425
											219.425
											218.45
											218.45
											218.45
											218.45
											218.125
											218.125
											218.125
											218.125
											217.8
											217.8
											217.475
											217.475
											217.475
											217.475
											217.475
											216.825
											216.825
											216.825
											216.825
											216.825
											216.5
											216.175
											215.85
											215.525
											215.525
											215.2
											214.225
											214.225
											213.25
											213.25
											212.6
											212.6
											212.275
											211.625
											211.3
											210.975
											210.975
											210.975
											210.325
											210.325
											210.325
											210.325
											210.325
											210
											209.675
											209.35
											209.35
											209.025
											209.025
											209.025
											209.025
											208.7
											208.7
											208.7
											208.7
											208.375
											208.375
											208.05
											207.4
											207.4
											206.75
											206.425
											206.1
											206.1
											205.775
											205.775
											205.45
											205.125
											205.125
											204.8
											204.475
											204.475
											204.475
											204.475
											204.475
											204.475
											204.475
											204.475
											204.15
											204.15
											203.825
											203.175
											203.175
											203.175
											203.175
											202.525
											202.525
											202.2
											201.875
											201.875
											201.875
											201.875
											201.55
											201.55
											201.225
											201.225
											201.225
											200.9
											200.9
[truncated: 634 more rows]

## Sheet: Figure 6C
	Events in a cluster			Events in a cluster			Events in a cluster			Events in a cluster			Events in a cluster			Events in a cluster
Control Low	1st	last	Control High	1st	last	Noc Low	1st	last	Noc High	1st	last	Taxol Low	1st	last	Taxol High	1st	last
	91.05	160.925		80.65	171.65		87.8	532.4		80.975	309.45		116.725	296.125		89.1	125.175
	141.1	254.525		83.9	111.85		93.65	183.025		82.6	522.325		123.875	428.4		93.65	154.75
	153.775	565.225		84.55	472.6		96.25	177.825		82.925	499.575		145.65	298.075		94.3	302.625
	161.575	184.325		87.15	341.95		111.525	116.725		85.2	499.25		170.675	488.85		94.95	151.175
	181.4	268.175		87.475	250.625		140.45	572.05		86.825	362.75		192.125	587.65		101.45	554.825
	193.1	274.675		87.8	260.05		200.575	596.1		87.15	494.05		195.05	247.375		115.425	235.35
	194.4	297.1		88.775	430.35		207.075	232.1		88.775	557.75		225.275	503.15		119.65	250.3
	197	549.3		89.75	211.95		212.275	428.075		89.1	556.45		226.575	496.325		124.85	347.8
	242.825	279.55		90.075	539.875		239.25	528.5		89.425	140.125		244.775	460.25		125.825	504.125
	261.025	520.7		90.4	583.75		270.775	413.775		90.075	169.7		312.7	383.55		160.275	405.975
	271.425	568.15		95.925	538.9		304.9	354.625		90.4	546.05		324.075	413.775		160.925	593.825
	319.2	409.875		101.775	111.525		323.1	507.7		90.725	333.5		385.5	501.2		205.775	209.35
	342.6	582.125		102.425	116.075		330.25	555.8		91.05	567.175		390.05	560.025		236	389.4
	342.6	597.725		102.75	268.175		335.45	533.7		91.05	358.525		521.025	572.7		252.9	550.925
	386.8	598.05		103.4	578.875		360.15	390.375		94.625	336.425					285.725	395.9
	405	565.875		103.4	531.425		376.725	386.8		95.6	111.2					304.575	444.325
	438.475	470		104.375	164.5		405	512.9		95.6	544.1					307.5	573.675
	474.55	576.275		108.275	238.925		412.15	549.95		96.575	565.55					320.5	519.075
	545.725	560.35		110.55	383.55		414.425	470		96.9	500.875					329.925	592.2
				111.525	548.975		487.875	563.925		97.875	168.4					337.075	528.825
				111.85	440.1					99.5	583.1					351.375	597.725
				113.8	176.525					99.825	524.925					378.025	522
				114.45	216.825					105.025	401.1					392.975	531.425
				115.425	254.85					107.3	144.35					392.975	592.85
				115.425	300.35					110.225	361.775					395.575	548
				116.075	209.025					110.225	578.875					408.9	573.025
				117.7	261.35					111.2	431.975					412.15	590.25
				119.325	154.425					112.175	288.975					430.025	597.075
				121.275	326.675					113.15	292.55					479.75	522.975
				122.575	319.525					114.125	587.65					493.725	596.75
				126.475	315.3					114.125	171.65					550.925	584.725
				127.125	544.1					114.45	561.325					571.4	593.825
				128.425	169.375					115.1	543.775
				130.375	234.05					115.75	264.275
				132	545.4					116.075	443.35
				138.825	514.525					117.05	587.325
				139.475	184.65					117.7	150.85
				140.125	240.225					118.675	437.825
				140.45	210.975					120.3	485.275
				142.4	330.25					122.575	590.575
				142.4	310.425					123.55	290.925
				144.35	320.825					123.875	266.225
				148.575	451.15					125.175	547.025
				150.85	311.4					126.15	404.025
				150.85	281.5					126.475	557.425
				153.775	465.45					129.075	471.625
				157.025	551.9					130.7	481.375
				158.975	213.25					131.025	493.725
				161.575	418.325					131.35	204.15
				161.575	412.15					131.35	598.05
				162.225	517.775					131.675	569.775
				163.85	543.45					132.65	472.275
				167.1	578.55					133.3	249.975
				168.075	229.825					134.925	255.175
				168.4	266.225					135.575	510.3
				170.025	299.375					139.15	256.8
				170.675	476.175					140.775	589.6
				172.625	469.35					141.1	435.225
				174.575	373.475					141.1	437.825
				177.175	518.75					141.75	254.525
				181.725	215.2					142.075	301.325
				182.05	456.35					143.05	358.2
				183.35	583.425					143.375	359.175
				186.275	546.7					144.35	457
				186.275	425.475					144.675	459.275
				189.525	259.075					145.325	411.825
				190.5	418					145.975	157.675
				191.15	567.175					146.95	571.4
				195.05	286.05					147.925	380.3
				196.675	407.275					148.575	522.325
				197.975	515.825					148.575	190.5
				198.95	210					148.9	150.2
				200.25	203.175					150.525	486.25
				204.8	282.475					150.525	259.4
				208.375	258.75					151.5	256.15
				213.575	388.75					153.125	563.275
				216.175	269.475					153.125	416.7
				222.35	338.7					154.1	342.925
				223.325	273.05					154.1	338.375
				226.9	335.125					155.075	424.175
				227.55	430.025					157.675	319.2
				230.15	302.3					159.625	204.475
				231.775	431					159.95	545.075
				238.925	338.05					160.275	271.1
				242.5	600					162.55	358.2
				245.425	266.225					162.875	217.475
				248.35	329.275					163.525	434.25
				248.675	542.475					163.525	300.675
				260.05	322.125					164.5	251.925
				260.7	466.425					166.125	574.975
				261.675	500.55					166.775	422.225
				268.825	323.75					169.05	482.35
				270.125	305.875					171.65	238.925
				275.325	466.425					172.3	469.675
				277.275	380.625					173.275	593.175
				283.125	357.225					175.875	401.1
				288	333.825					175.875	318.55
				314	509					176.85	355.275
				337.725	496.65					177.5	537.275
				348.45	496.65					177.825	593.825
				353.325	433.925					178.475	469.35
				387.775	565.55					180.1	534.35
				394.925	600					180.425	574
				418	548.975					180.75	331.875
				469.025	587.975					180.75	352.675
				487.875	593.175					181.075	557.1
				538.25	552.875					184.975	531.75
										185.3	210.325
										187.9	220.725
										187.9	393.625
										188.875	572.05
										189.85	593.825
										190.175	333.175
										190.825	245.1
										194.075	489.175
										194.4	309.775
										196.675	518.75
										198.3	557.425
										199.275	296.125
										199.6	253.55
										199.6	575.95
										199.6	303.6
										201.225	353.325
										203.175	362.425
										204.475	315.95
										208.7	565.875
										209.025	330.9
										209.025	597.725
										210.975	502.825
										211.625	514.85
										213.25	326.35
										216.825	416.05
										220.075	566.525
										220.725	377.375
										221.375	510.95
										221.7	491.775
										223.325	369.25
										223.65	447.9
										223.975	397.525
										225.925	343.9
										226.575	529.8
										226.9	415.4
										230.8	352.35
										233.4	270.125
										234.375	312.7
										236	550.6
										236.65	478.45
										236.65	436.85
										236.975	368.925
										237.3	283.45
										237.625	491.125
										239.25	314.975
										242.825	529.15
										243.8	566.2
										244.45	336.1
										246.4	572.375
										247.05	510.625
										247.7	585.375
										248.35	476.5
										249.65	267.85
										250.625	316.925
										251.6	381.925
										251.925	330.9
										252.9	391.025
										254.2	446.925
										254.2	590.9
										254.85	587.975
										255.175	508.675
										255.825	580.825
										257.125	516.475
										257.125	377.7
										260.375	495.675
										260.375	548.65
										261.675	475.85
										261.675	538.9
										262	525.9
										262.325	353
										263.625	384.2
										263.95	471.95
										263.95	562.3
										264.6	369.9
										265.575	548
										265.9	389.4
										266.55	405.975
										266.875	418.65
										267.525	526.225
										268.175	561.975
										269.475	591.225
										269.8	342.6
										272.075	348.45
										273.7	596.75
										275.325	328.95
										277.275	461.875
										278.25	484.95
										281.175	407.6
										283.125	582.45
										283.775	489.5
										283.775	491.45
										285.075	543.125
										291.25	559.375
										292.225	503.475
										292.55	363.4
										292.55	383.875
										293.525	570.75
										296.125	581.15
										296.775	297.75
										297.1	590.575
										297.425	359.175
										298.075	567.825
										298.4	405
										301.65	580.825
										305.875	592.85
										306.85	458.3
										308.475	433.6
										309.775	598.7
										309.775	371.2
										313.35	575.95
										313.675	457.325
										313.675	599.35
										314.325	448.875
										319.525	486.9
										319.85	485.275
										321.15	535.65
										322.45	525.575
										325.05	487.875
										325.7	481.05
										327	410.2
										328.3	396.875
										330.25	411.175
										330.575	406.625
										334.15	394.275
										342.275	580.5
										345.525	592.525
										346.5	443.35
										346.5	584.075
										346.825	379.325
										349.1	540.85
										350.4	381.925
										353.65	413.125
										356.25	477.15
										357.225	468.05
										359.825	510.625
										364.05	551.25
										364.05	408.9
										364.375	546.7
										365.35	562.3
										367.625	442.05
										368.275	519.075
										369.9	599.35
										370.225	590.575
										370.225	596.1
										371.525	479.425
										371.85	566.2
										379.325	591.875
										387.125	458.3
										387.45	577.9
										389.4	428.4
										391.025	483.325
										394.6	520.05
										395.25	593.825
										396.225	460.9
										397.525	548
										398.175	578.225
										398.825	466.425
										400.45	582.125
										400.775	559.05
										402.725	522
										404.675	548.975
										406.3	451.15
										408.25	512.9
										411.825	589.925
										412.15	521.35
										417.675	562.625
										419.95	574.65
										422.875	432.625
										428.725	549.3
										435.875	452.45
										447.25	509.325
										448.55	596.425
										448.55	545.725
										450.5	591.225
										479.1	572.7
										480.725	509.325
										483	585.05
										491.45	568.15
										493.4	576.275
										495.675	581.475
										499.9	597.4
										501.85	541.175
										527.85	549.625

## Sheet: Figure 6D
	Events in a cluster			Events in a cluster			Events in a cluster			Events in a cluster			Events in a cluster			Events in a cluster
Control Low	1st	last	Control High	1st	last	Noc Low	1st	last	Noc High	1st	last	Taxol Low	1st	last	Taxol High	1st	last
	91.05	160.925		80.65	171.65		87.8	532.4		80.975	309.45		116.725	296.125		89.1	125.175
	141.1	254.525		83.9	111.85		93.65	183.025		82.6	522.325		123.875	428.4		93.65	154.75
	153.775	565.225		84.55	472.6		96.25	177.825		82.925	499.575		145.65	298.075		94.3	302.625
	161.575	184.325		87.15	341.95		111.525	116.725		85.2	499.25		170.675	488.85		94.95	151.175
	181.4	268.175		87.475	250.625		140.45	572.05		86.825	362.75		192.125	587.65		101.45	554.825
	193.1	274.675		87.8	260.05		200.575	596.1		87.15	494.05		195.05	247.375		115.425	235.35
	194.4	297.1		88.775	430.35		207.075	232.1		88.775	557.75		225.275	503.15		119.65	250.3
	197	549.3		89.75	211.95		212.275	428.075		89.1	556.45		226.575	496.325		124.85	347.8
	242.825	279.55		90.075	539.875		239.25	528.5		89.425	140.125		244.775	460.25		125.825	504.125
	261.025	520.7		90.4	583.75		270.775	413.775		90.075	169.7		312.7	383.55		160.275	405.975
	271.425	568.15		95.925	538.9		304.9	354.625		90.4	546.05		324.075	413.775		160.925	593.825
	319.2	409.875		101.775	111.525		323.1	507.7		90.725	333.5		385.5	501.2		205.775	209.35
	342.6	582.125		102.425	116.075		330.25	555.8		91.05	567.175		390.05	560.025		236	389.4
	342.6	597.725		102.75	268.175		335.45	533.7		91.05	358.525		521.025	572.7		252.9	550.925
	386.8	598.05		103.4	578.875		360.15	390.375		94.625	336.425					285.725	395.9
	405	565.875		103.4	531.425		376.725	386.8		95.6	111.2					304.575	444.325
	438.475	470		104.375	164.5		405	512.9		95.6	544.1					307.5	573.675
	474.55	576.275		108.275	238.925		412.15	549.95		96.575	565.55					320.5	519.075
	545.725	560.35		110.55	383.55		414.425	470		96.9	500.875					329.925	592.2
				111.525	548.975		487.875	563.925		97.875	168.4					337.075	528.825
				111.85	440.1					99.5	583.1					351.375	597.725
				113.8	176.525					99.825	524.925					378.025	522
				114.45	216.825					105.025	401.1					392.975	531.425
				115.425	254.85					107.3	144.35					392.975	592.85
				115.425	300.35					110.225	361.775					395.575	548
				116.075	209.025					110.225	578.875					408.9	573.025
				117.7	261.35					111.2	431.975					412.15	590.25
				119.325	154.425					112.175	288.975					430.025	597.075
				121.275	326.675					113.15	292.55					479.75	522.975
				122.575	319.525					114.125	587.65					493.725	596.75
				126.475	315.3					114.125	171.65					550.925	584.725
				127.125	544.1					114.45	561.325					571.4	593.825
				128.425	169.375					115.1	543.775
				130.375	234.05					115.75	264.275
				132	545.4					116.075	443.35
				138.825	514.525					117.05	587.325
				139.475	184.65					117.7	150.85
				140.125	240.225					118.675	437.825
				140.45	210.975					120.3	485.275
				142.4	330.25					122.575	590.575
				142.4	310.425					123.55	290.925
				144.35	320.825					123.875	266.225
				148.575	451.15					125.175	547.025
				150.85	311.4					126.15	404.025
				150.85	281.5					126.475	557.425
				153.775	465.45					129.075	471.625
				157.025	551.9					130.7	481.375
				158.975	213.25					131.025	493.725
				161.575	418.325					131.35	204.15
				161.575	412.15					131.35	598.05
				162.225	517.775					131.675	569.775
				163.85	543.45					132.65	472.275
				167.1	578.55					133.3	249.975
				168.075	229.825					134.925	255.175
				168.4	266.225					135.575	510.3
				170.025	299.375					139.15	256.8
				170.675	476.175					140.775	589.6
				172.625	469.35					141.1	435.225
				174.575	373.475					141.1	437.825
				177.175	518.75					141.75	254.525
				181.725	215.2					142.075	301.325
				182.05	456.35					143.05	358.2
				183.35	583.425					143.375	359.175
				186.275	546.7					144.35	457
				186.275	425.475					144.675	459.275
				189.525	259.075					145.325	411.825
				190.5	418					145.975	157.675
				191.15	567.175					146.95	571.4
				195.05	286.05					147.925	380.3
				196.675	407.275					148.575	522.325
				197.975	515.825					148.575	190.5
				198.95	210					148.9	150.2
				200.25	203.175					150.525	486.25
				204.8	282.475					150.525	259.4
				208.375	258.75					151.5	256.15
				213.575	388.75					153.125	563.275
				216.175	269.475					153.125	416.7
				222.35	338.7					154.1	342.925
				223.325	273.05					154.1	338.375
				226.9	335.125					155.075	424.175
				227.55	430.025					157.675	319.2
				230.15	302.3					159.625	204.475
				231.775	431					159.95	545.075
				238.925	338.05					160.275	271.1
				242.5	600					162.55	358.2
				245.425	266.225					162.875	217.475
				248.35	329.275					163.525	434.25
				248.675	542.475					163.525	300.675
				260.05	322.125					164.5	251.925
				260.7	466.425					166.125	574.975
				261.675	500.55					166.775	422.225
				268.825	323.75					169.05	482.35
				270.125	305.875					171.65	238.925
				275.325	466.425					172.3	469.675
				277.275	380.625					173.275	593.175
				283.125	357.225					175.875	401.1
				288	333.825					175.875	318.55
				314	509					176.85	355.275
				337.725	496.65					177.5	537.275
				348.45	496.65					177.825	593.825
				353.325	433.925					178.475	469.35
				387.775	565.55					180.1	534.35
				394.925	600					180.425	574
				418	548.975					180.75	331.875
				469.025	587.975					180.75	352.675
				487.875	593.175					181.075	557.1
				538.25	552.875					184.975	531.75
										185.3	210.325
										187.9	220.725
										187.9	393.625
										188.875	572.05
										189.85	593.825
										190.175	333.175
										190.825	245.1
										194.075	489.175
										194.4	309.775
										196.675	518.75
										198.3	557.425
										199.275	296.125
										199.6	253.55
										199.6	575.95
										199.6	303.6
										201.225	353.325
										203.175	362.425
										204.475	315.95
										208.7	565.875
										209.025	330.9
										209.025	597.725
										210.975	502.825
										211.625	514.85
										213.25	326.35
										216.825	416.05
										220.075	566.525
										220.725	377.375
										221.375	510.95
										221.7	491.775
										223.325	369.25
										223.65	447.9
										223.975	397.525
										225.925	343.9
										226.575	529.8
										226.9	415.4
										230.8	352.35
										233.4	270.125
										234.375	312.7
										236	550.6
										236.65	478.45
										236.65	436.85
										236.975	368.925
										237.3	283.45
										237.625	491.125
										239.25	314.975
										242.825	529.15
										243.8	566.2
										244.45	336.1
										246.4	572.375
										247.05	510.625
										247.7	585.375
										248.35	476.5
										249.65	267.85
										250.625	316.925
										251.6	381.925
										251.925	330.9
										252.9	391.025
										254.2	446.925
										254.2	590.9
										254.85	587.975
										255.175	508.675
										255.825	580.825
										257.125	516.475
										257.125	377.7
										260.375	495.675
										260.375	548.65
										261.675	475.85
										261.675	538.9
										262	525.9
										262.325	353
										263.625	384.2
										263.95	471.95
										263.95	562.3
										264.6	369.9
										265.575	548
										265.9	389.4
										266.55	405.975
										266.875	418.65
										267.525	526.225
										268.175	561.975
										269.475	591.225
										269.8	342.6
										272.075	348.45
										273.7	596.75
										275.325	328.95
										277.275	461.875
										278.25	484.95
										281.175	407.6
										283.125	582.45
										283.775	489.5
										283.775	491.45
										285.075	543.125
										291.25	559.375
										292.225	503.475
										292.55	363.4
										292.55	383.875
										293.525	570.75
										296.125	581.15
										296.775	297.75
										297.1	590.575
										297.425	359.175
										298.075	567.825
										298.4	405
										301.65	580.825
										305.875	592.85
										306.85	458.3
										308.475	433.6
										309.775	598.7
										309.775	371.2
										313.35	575.95
										313.675	457.325
										313.675	599.35
										314.325	448.875
										319.525	486.9
										319.85	485.275
										321.15	535.65
										322.45	525.575
										325.05	487.875
										325.7	481.05
										327	410.2
										328.3	396.875
										330.25	411.175
										330.575	406.625
										334.15	394.275
										342.275	580.5
										345.525	592.525
										346.5	443.35
										346.5	584.075
										346.825	379.325
										349.1	540.85
										350.4	381.925
										353.65	413.125
										356.25	477.15
										357.225	468.05
										359.825	510.625
										364.05	551.25
										364.05	408.9
										364.375	546.7
										365.35	562.3
										367.625	442.05
										368.275	519.075
										369.9	599.35
										370.225	590.575
										370.225	596.1
										371.525	479.425
										371.85	566.2
										379.325	591.875
										387.125	458.3
										387.45	577.9
										389.4	428.4
										391.025	483.325
										394.6	520.05
										395.25	593.825
										396.225	460.9
										397.525	548
										398.175	578.225
										398.825	466.425
										400.45	582.125
										400.775	559.05
										402.725	522
										404.675	548.975
										406.3	451.15
										408.25	512.9
										411.825	589.925
										412.15	521.35
										417.675	562.625
										419.95	574.65
										422.875	432.625
										428.725	549.3
										435.875	452.45
										447.25	509.325
										448.55	596.425
										448.55	545.725
										450.5	591.225
										479.1	572.7
										480.725	509.325
										483	585.05
										491.45	568.15
										493.4	576.275
										495.675	581.475
										499.9	597.4
										501.85	541.175
										527.85	549.625

## Sheet: Figure 6-figure supplement 1A
	Control High		Noc High
Time (s)	Non-clustered	Clustered	Non-clustered	Clustered
90-120	2.44059	1.44672	1.22152	1.80878
120-180	3.59666	4.34015	1.47992	3.85247
150-180	4.62428	5.45807	2.44304	5.16795
180-210	5.39499	5.45807	2.13766	3.99342
210-240	4.36737	4.80047	2.34907	4.01691
240-270	5.00963	3.68255	2.74841	5.49682
270-300	3.14708	3.55103	3.07728	5.5438
300-330	3.53243	2.56463	2.84238	4.74512
330-360	2.76172	1.57824	2.98332	4.46323
360-390	3.01863	1.05216	2.70143	4.06389
390-420	2.89017	0.986397	2.23162	3.54709
420-450	2.05523	1.51248	2.13766	2.81888
450-480	2.05523	1.05216	1.85577	2.72492
480-510	2.69749	1.644	1.64435	3.07728
510-540	3.59666	1.3152	1.73831	2.13765
540-570	3.2113	1.24944	1.87926	1.94973
570-600	2.9544	0.986397	2.11416	1.87925
