# Supplementary material for: Microtubules regulate pancreatic β-cell heterogeneity via spatiotemporal control of insulin secretion hot spots
Source: eLife. 2021 Nov 16;10:e59912. doi: 10.7554/eLife.59912 (PMC8635970; doi:10.7554/eLife.59912)
Supplement: Figure 7—source data 1. — Each data set is a separate sheet. [file elife-59912-fig7-data1.xlsx]

## Sheet: Figure 7 A
DMSO h	Noc-H	Dia-H	Noc-Dia-H
					Tukey's multiple comparisons test	Mean Diff.	95.00% CI of diff.	Significant?	Summary	Adjusted P Value
0.05	0.114	0.014	0.013
0.05	0.186	0.025	0.015		DMSO-H vs. Noc-H	-0.086	-0.1502 to -0.02185	Yes	**	0.0046
0.109	0.426	0.022	0.02		DMSO-H vs. Dia-H	0.05318	-0.02243 to 0.1288	No	ns	0.2522
0.046	0.224	0.004	0.007		DMSO-H vs. Noc+Dia-H	0.05063	-0.03160 to 0.1329	No	ns	0.3653
0.026	0.33	0.005	0.006		Noc-H vs. Dia-H	0.1392	0.06357 to 0.2148	Yes	****	<0.0001
0.056	0.175	0.001	0.007		Noc-H vs. Noc+Dia-H	0.1366	0.05440 to 0.2189	Yes	***	0.0003
0.019	0.042	0.001	0.009		Dia-H vs. Noc+Dia-H	-0.002556	-0.09400 to 0.08889	No	ns	0.9998
0.0391504	0.144	0.00205209
0.0917658	0.087	0.00182815
0.046	0.043
0.071	0.172707
0.039	0.071819
0.053	0.115434
0.0278079	0.0361208
0.17526	0.163535
0.0869237	0.0308914

## Sheet: Figure 7 E
152.637	139.564
158.689	116.075
120.354	85.3481
83.1175	123.627
113.51	94.9408
121.417	72.4751
80.7744	81.2893
80.9767	76.4739
61.8752	76.0139
53.6415	82.6642
58.5478	67.2854
64.3109	78.5186
45.4221	80.6798
56.6711	81.0897
59.0316	111.311
57.688	95.3538
76.9337	113.73
111.667	112.97
67.639	130.214
102.481	144.246
68.9608	142.339
75.2257	121.307
86.8591	143.281
86.7218	78.618
78.1005	61.251
84.0786	72.3529
86.0911	77.0108
80.2193	92.6135
64.6023	73.284
65.2231	62.7737
57.953	68.6522
73.5717	76.6437
66.0092	76.4185
45.3071	58.9206
55.6943	52.7457
56.7161	80.0061
48.6896	72.1634
71.6933	66.6185
83.4461	68.7775
83.2491	89.2346
73.086	73.1823
113.967	67.101
64.8251	69.607
91.9535	81.0078
74.8853	12.3066
113.498	40.4011
89.1296	24.1302
76.3958	39.7314
58.9288	49.5876
62.7063	65.2032
62.5024	64.0922
69.4571	47.6397
73.2791	56.1287
75.1396	75.5913
66.1146	55.3041
70.3267	49.3652			Mann-Whitney test
52.782	36.6588
72.0667	35.1586			Table Analyzed	Data 6
73.8918	45.4025
57.8567	34.212			Column B	Nocodazole
91.3506	68.451			vs.	vs.
54.1292	57.9854			Column A	DMSO
40.0735	76.2458
74.0127	66.6237			Mann Whitney test
74.2939	79.6217			P value	0.1325
79.3159	64.3415			Exact or approximate P value?	Exact
60.5972	62.9166			P value summary	ns
49.4496	155.894			Significantly different (P < 0.05)?	No
63.0736	148.691			One- or two-tailed P value?	Two-tailed
74.5272	74.4086			Sum of ranks in column A,B	8941 , 8265
74.623	114.876			Mann-Whitney U	3688
76.9249	156.207
84.0575	189.541			Difference between medians
65.5908	80.6881			Median of column A	73.43, n=102
67.9821	120.939			Median of column B	76.64, n=83
92.0926	129.269			Difference: Actual	3.218
87.5999	98.302			Difference: Hodges-Lehmann	4.74
68.9323	106.296
46.4059	136.471
64.8124	96.191
58.2021	125.662
82.6642	127.38
67.2854	87.5971
78.5186
80.6798
81.0897
65.7762
71.4051
63.6537
60.5671
63.9996
65.1212
71.3871
107.261
136.845
97.2324
115.593
77.0789
115.152
71.8445
96.5229
126.178

## Sheet: Figure 7 D
DMSO	Nocodazole				Mann-Whitney test
3.39915	2.039
3.0756	1.56207				Table Analyzed	Data 6
3.35732	1.30092
3.13104	1.96779				Column B	Nocodazole
2.60074	1.18231				vs.	vs.
2.9278	0.529302				Column A	DMSO
1.8368	0.828547
1.71853	0.542455				Mann Whitney test
1.11064	0.833877				P value	0.0052
0.889032	0.916348				Exact or approximate P value?	Exact
0.86624	0.757217				P value summary	**
1.34384	0.585722				Significantly different (P < 0.05)?	Yes
0.6397	0.882657				One- or two-tailed P value?	Two-tailed
1.13036	0.696147				Sum of ranks in column A,B	10494 , 6711
1.5777	2.07433				Mann-Whitney U	3225
1.17684	1.7731
1.78751	2.13848				Difference between medians
2.27224	2.62256				Median of column A	1.465, n=102
1.38656	2.46427				Median of column B	1.182, n=83
2.13711	2.96121				Difference: Actual	-0.2828
1.06653	2.8081				Difference: Hodges-Lehmann	-0.2582
1.83534	2.07707
1.6681	2.60639
1.56485	1.52519
1.04714	1.20775
1.46385	1.58755
1.18333	1.55338
1.29844	1.27516
0.999842	1.34599
1.25771	1.25947
0.785957	1.36699
1.37863	2.09271
1.08348	1.68146
0.447599	1.04636
0.969734	0.935007
1.39281	1.65095
0.742919	1.1553
1.78513	1.23767
2.51285	1.20873
1.64566	1.76712
1.54165	1.13058
3.15758	1.27229
1.78866	0.984347
2.21982	1.29323
1.52476	0.127852
3.09611	0.610727
2.17463	0.563409
1.32222	0.654019
0.89112	0.835832
1.0271	1.05612
0.999613	1.06542
1.10033	1.01586
1.18118	0.849172
1.30009	0.993278
1.44288	0.999416
0.980405	0.403644
0.778261	0.217064
1.20438	0.223574
1.51193	0.714071
1.20231	0.505594
2.26126	0.784462
1.63634	0.741728
0.627168	1.18073
1.74414	1.0331
1.73142	1.21243
1.84242	1.00194
1.20328	0.75402
0.879913	3.17975
1.21656	3.17631
1.58082	1.12903
1.62352	2.28437
1.71341	3.98914
1.9785	4.30758
1.4115	1.85163
1.30719	3.79873
2.16817	1.9278
2.06511	0.602288
1.31491	1.65023
0.760993	1.11539
1.33633	1.53946
0.827176	1.9192
1.46645	1.08876
1.16362	1.17872
1.12887
1.56012
1.40488
1.26489
1.70988
1.48977
1.32503
1.22945
1.48505
1.58259
3.15263
4.05284
2.95733
2.89825
2.00358
1.95089
1.03764
2.24371
3.57722

## Sheet: Fig7-Suppl Fig 1 A - islet 1
	cell1	cell2	cell3	cell4	cell5	cell6	cell7	cell8	cell9	cell10	cell11	cell12	cell13	cell14	cell15
time (min)	fold inc int	fold inc int	fold inc int	fold inc int	fold inc int	fold inc int	fold inc int	fold inc int	fold inc int	fold inc int	fold inc int	fold inc int	fold inc int	fold inc int	fold inc int
1.5	0.636006	0.670163	0.712251	0.657867	0.60737	0.52239	0.546543	0.699151	0.512349	0.76348	0.517884	0.596371	0.566001	0.751467	0.748692
	0.640082	0.666117	0.695957	0.633336	0.580418	0.512629	0.506634	0.681842	0.495128	0.752353	0.514577	0.573346	0.526264	0.745599	0.741967
	0.61192	0.616964	0.688638	0.618228	0.576399	0.508964	0.516233	0.681637	0.497077	0.754376	0.517917	0.567399	0.548895	0.743602	0.743174
	0.657401	0.699236	0.707938	0.635286	0.612271	0.511594	0.542175	0.691768	0.509366	0.764322	0.519436	0.611772	0.557751	0.770041	0.783928
	0.642847	0.699086	0.713863	0.637804	0.594139	0.502869	0.537321	0.694598	0.51756	0.763283	0.51785	0.544068	0.547305	0.754976	0.73938
	0.639572	0.680054	0.707676	0.634636	0.570911	0.522709	0.52017	0.69226	0.503202	0.764154	0.510055	0.57426	0.553285	0.74088	0.75513
	0.640518	0.608122	0.694302	0.598083	0.580222	0.495179	0.528907	0.666954	0.493259	0.754264	0.501215	0.531107	0.515516	0.731563	0.728976
	0.641028	0.707028	0.705672	0.646982	0.592277	0.52239	0.538723	0.68135	0.514378	0.76879	0.523046	0.596676	0.548517	0.757457	0.745358
	0.623708	0.677956	0.696785	0.61311	0.586494	0.510876	0.531981	0.683073	0.504474	0.759658	0.513025	0.58219	0.542764	0.731865	0.752659
	0.621598	0.607373	0.693169	0.611973	0.576105	0.50745	0.509061	0.67245	0.499065	0.749347	0.510325	0.567094	0.531562	0.729264	0.742714
	0.630767	0.646186	0.703668	0.642352	0.575615	0.499124	0.523514	0.681965	0.503401	0.754264	0.517378	0.57914	0.541856	0.763023	0.749899
	0.657983	0.686198	0.707502	0.638941	0.592081	0.514064	0.514993	0.675649	0.503957	0.76348	0.511135	0.555505	0.537466	0.76272	0.74829
	0.64161	0.649183	0.699007	0.637479	0.614623	0.530359	0.538345	0.686518	0.509526	0.759939	0.524666	0.600183	0.552452	0.766411	0.750762
	0.624218	0.660722	0.710203	0.619284	0.605116	0.50992	0.538453	0.694721	0.517838	0.76362	0.520988	0.603385	0.5604	0.762176	0.770593
	0.636152	0.646636	0.696916	0.609536	0.581594	0.505179	0.530094	0.680407	0.504753	0.753617	0.51677	0.566026	0.536255	0.732773	0.743347
	0.631349	0.666117	0.69282	0.599383	0.58277	0.502032	0.521033	0.68176	0.503281	0.751033	0.517445	0.575023	0.540796	0.725452	0.743519
	0.631786	0.624157	0.678313	0.612867	0.58473	0.506135	0.519523	0.682458	0.497156	0.755865	0.51866	0.552455	0.54178	0.739791	0.73162
	0.625891	0.61082	0.685806	0.632118	0.572185	0.512908	0.507443	0.675649	0.494173	0.745132	0.515016	0.565721	0.522025	0.774518	0.742772
	0.632586	0.639143	0.705367	0.646657	0.595315	0.519442	0.521896	0.686969	0.511554	0.754517	0.51785	0.573041	0.549273	0.75546	0.733057
	0.641028	0.634647	0.708983	0.631468	0.601196	0.513785	0.528799	0.690169	0.506383	0.762356	0.527433	0.634492	0.560021	0.757941	0.755992
	0.64583	0.674359	0.700706	0.623914	0.62266	0.524781	0.540287	0.697018	0.502526	0.76185	0.522911	0.619854	0.572586	0.743663	0.758522
	0.638772	0.65293	0.672345	0.614572	0.58424	0.511434	0.523676	0.682704	0.504832	0.756849	0.511101	0.535377	0.532622	0.746385	0.713169
	0.640373	0.653679	0.696785	0.632361	0.605116	0.518486	0.510355	0.679874	0.501014	0.749487	0.518491	0.567551	0.564108	0.757154	0.735242
	0.639572	0.667466	0.68328	0.618471	0.596589	0.503745	0.519038	0.691235	0.498668	0.751342	0.518322	0.589052	0.564108	0.736342	0.742139
	0.616868	0.666117	0.693648	0.613029	0.591101	0.507251	0.527991	0.687133	0.506662	0.741592	0.515623	0.564501	0.553588	0.733136	0.73323
	0.619051	0.616364	0.694476	0.620096	0.554739	0.515179	0.513699	0.685247	0.503759	0.752578	0.499055	0.54849	0.531941	0.741666	0.745243
	0.649542	0.640192	0.699617	0.636504	0.575713	0.515697	0.531388	0.696485	0.506821	0.759096	0.514611	0.611772	0.545716	0.741666	0.75536
	0.630549	0.634198	0.693605	0.612135	0.596491	0.511514	0.523838	0.654567	0.497793	0.758703	0.507828	0.580207	0.530427	0.747474	0.743519
	0.606316	0.627154	0.679577	0.585655	0.595609	0.51	0.525294	0.678725	0.493537	0.750836	0.513531	0.559774	0.524902	0.719705	0.721101
	0.621598	0.644238	0.691296	0.6296	0.571009	0.51243	0.50631	0.69509	0.505668	0.747998	0.510123	0.544068	0.550484	0.744086	0.729838
	0.643356	0.682452	0.692515	0.627244	0.584632	0.513187	0.53182	0.682991	0.492543	0.75609	0.52227	0.562519	0.550333	0.748987	0.741795
	0.65398	0.658474	0.693866	0.62765	0.602666	0.520717	0.536404	0.689676	0.515849	0.760361	0.526589	0.563739	0.565244	0.758606	0.729781
	0.618906	0.623258	0.679184	0.614735	0.570224	0.505657	0.527343	0.67003	0.497673	0.755107	0.507322	0.601555	0.555253	0.74814	0.742427
	0.600495	0.62086	0.685153	0.583706	0.567088	0.513466	0.524269	0.67651	0.495207	0.748785	0.520718	0.58097	0.538223	0.741545	0.72455
	0.628366	0.642889	0.679925	0.591991	0.585612	0.513745	0.529447	0.686354	0.502565	0.751566	0.516635	0.574413	0.534665	0.73489	0.734667
	0.631204	0.673011	0.682452	0.625701	0.576791	0.511912	0.525833	0.683073	0.502764	0.75196	0.517681	0.554895	0.538299	0.754976	0.741795
	0.662931	0.656376	0.691034	0.632605	0.593943	0.513785	0.537213	0.684262	0.509008	0.75831	0.521427	0.596981	0.547154	0.769617	0.763982
	0.626765	0.59958	0.689422	0.611161	0.595021	0.507769	0.511541	0.677782	0.499344	0.74842	0.509988	0.540104	0.544656	0.740759	0.723745
	0.616577	0.613667	0.678487	0.598083	0.549544	0.515896	0.511272	0.672081	0.489798	0.744514	0.50992	0.584782	0.537239	0.738339	0.751854
	0.623636	0.649183	0.682321	0.63626	0.614133	0.521514	0.527235	0.673475	0.504435	0.752353	0.516298	0.570296	0.538071	0.758364	0.744841
	0.593436	0.590439	0.68341	0.590448	0.571695	0.514263	0.5048	0.672983	0.48256	0.744093	0.508469	0.562824	0.546246	0.753343	0.732253
	0.637389	0.6318	0.678226	0.607018	0.564932	0.508805	0.519308	0.670481	0.486219	0.745245	0.504015	0.60308	0.540645	0.738581	0.746106
	0.64925	0.66342	0.690642	0.63358	0.589336	0.512191	0.526373	0.686518	0.509207	0.753337	0.519166	0.587984	0.549273	0.751649	0.749152
	0.622107	0.668365	0.678705	0.620258	0.580025	0.50741	0.520386	0.688118	0.494094	0.746144	0.511742	0.546356	0.527702	0.747777	0.735414
	0.624654	0.624457	0.694215	0.607505	0.568754	0.514861	0.506526	0.687995	0.495128	0.740777	0.520347	0.564044	0.530276	0.737068	0.743519
	0.609518	0.632849	0.676745	0.608805	0.562384	0.494263	0.51742	0.67409	0.495526	0.749262	0.518693	0.5491	0.541553	0.747837	0.728574
	0.609882	0.677956	0.685806	0.618877	0.584632	0.513665	0.528961	0.681063	0.501849	0.743109	0.514509	0.587069	0.556691	0.747172	0.750129
	0.624218	0.621909	0.678836	0.620746	0.57042	0.506255	0.520494	0.667979	0.493179	0.743503	0.516736	0.543458	0.531335	0.748866	0.757717
	0.628075	0.633149	0.689117	0.605962	0.562678	0.499203	0.503452	0.667036	0.500974	0.74089	0.506951	0.542696	0.52967	0.742816	0.753808
	0.626546	0.666866	0.691993	0.623101	0.612075	0.51008	0.536026	0.681883	0.497315	0.748082	0.516163	0.566789	0.556388	0.7554	0.733805
	0.637462	0.658624	0.683628	0.631062	0.594923	0.511355	0.538885	0.692465	0.510003	0.759967	0.521022	0.611467	0.560475	0.749894	0.753751
	0.632805	0.650832	0.687636	0.630006	0.570714	0.503227	0.530795	0.681883	0.503361	0.749796	0.510595	0.57487	0.548971	0.746143	0.757717
	0.620361	0.689195	0.684892	0.616522	0.602078	0.513865	0.543631	0.686805	0.505866	0.74738	0.515893	0.576853	0.535347	0.750681	0.767661
	0.628729	0.600929	0.684325	0.620827	0.579143	0.508645	0.522058	0.681842	0.510082	0.760445	0.523181	0.585697	0.579398	0.752012	0.735357
	0.626255	0.65218	0.683933	0.634067	0.578457	0.514303	0.521249	0.681022	0.506702	0.748981	0.516973	0.587984	0.568423	0.751044	0.760821
	0.626183	0.627903	0.673129	0.59857	0.566108	0.498327	0.51084	0.659776	0.490474	0.740552	0.504758	0.566789	0.528913	0.710509	0.735874
	0.636225	0.676008	0.681145	0.61571	0.599334	0.517371	0.523406	0.695131	0.503759	0.747998	0.516264	0.607807	0.564411	0.767137	0.751796
	0.629384	0.626255	0.679359	0.612704	0.573067	0.507888	0.523622	0.679258	0.503918	0.737546	0.511169	0.598201	0.534665	0.740698	0.748117
	0.590234	0.603027	0.676178	0.594184	0.577477	0.505578	0.504153	0.664206	0.489321	0.738754	0.506175	0.535834	0.533909	0.717164	0.70926
	0.624509	0.613217	0.672563	0.604744	0.581888	0.503865	0.540557	0.669169	0.48777	0.754348	0.518154	0.585697	0.531108	0.739367	0.732483
	0.612284	0.635097	0.664634	0.61839	0.572087	0.510996	0.518121	0.676059	0.486537	0.73704	0.501282	0.544373	0.533606	0.742271	0.729264
	0.613157	0.665368	0.669077	0.630331	0.584044	0.513108	0.516988	0.669333	0.492026	0.74339	0.523249	0.576395	0.529973	0.747777	0.734839
	0.6248	0.574404	0.683149	0.604825	0.573067	0.503267	0.512404	0.675034	0.498509	0.736225	0.521899	0.564349	0.534893	0.724847	0.745243
	0.625309	0.650232	0.675307	0.605556	0.576889	0.50255	0.519955	0.66921	0.489162	0.738586	0.508132	0.595303	0.547835	0.739065	0.741335
	0.592563	0.638843	0.668424	0.627406	0.539743	0.49506	0.50755	0.665149	0.486696	0.74221	0.504791	0.533547	0.517408	0.731079	0.74099
	0.602969	0.592537	0.665156	0.599383	0.543272	0.501873	0.510786	0.674173	0.495406	0.73704	0.505871	0.551235	0.519528	0.722488	0.729666
	0.641173	0.699685	0.680622	0.621558	0.570028	0.513267	0.535649	0.66601	0.508611	0.755444	0.509448	0.58402	0.543748	0.742574	0.767144
	0.614976	0.609621	0.66899	0.589229	0.546996	0.49259	0.498166	0.666913	0.490992	0.739709	0.49838	0.499695	0.517106	0.701494	0.713284
	0.630185	0.633598	0.677268	0.623345	0.592081	0.509841	0.53813	0.676962	0.498389	0.747661	0.524497	0.591796	0.555253	0.751286	0.725068
	0.625382	0.659823	0.692646	0.600764	0.574537	0.512709	0.515424	0.671342	0.482719	0.73822	0.508908	0.587984	0.545565	0.73967	0.730701
	0.618178	0.622359	0.678531	0.606774	0.587866	0.501514	0.524916	0.668799	0.498509	0.738305	0.512519	0.560232	0.536633	0.721943	0.736679
	0.612938	0.65293	0.68145	0.610024	0.581006	0.508008	0.527667	0.674747	0.488804	0.73881	0.499528	0.559317	0.536028	0.722488	0.731965
	0.635424	0.628503	0.672998	0.640647	0.578555	0.514064	0.526211	0.682458	0.504077	0.748139	0.518727	0.625038	0.542386	0.750136	0.734724
	0.631349	0.640042	0.669382	0.610917	0.569538	0.502311	0.523622	0.674296	0.500935	0.735158	0.507153	0.559317	0.557448	0.739367	0.724435
	0.628002	0.622808	0.680404	0.606125	0.598451	0.504223	0.518984	0.67327	0.49823	0.748897	0.511675	0.575938	0.528762	0.748019	0.732655
	0.618396	0.643489	0.675481	0.636829	0.581006	0.498486	0.515802	0.662073	0.503162	0.740777	0.512957	0.580207	0.536482	0.746385	0.731046
	0.61745	0.637045	0.655267	0.621883	0.585808	0.492869	0.524809	0.669743	0.494253	0.739372	0.513396	0.55703	0.517863	0.739549	0.708915
	0.599331	0.582497	0.670428	0.584437	0.554641	0.48757	0.501025	0.663837	0.484071	0.740749	0.506006	0.541019	0.512489	0.732228	0.715008
	0.624072	0.615016	0.674131	0.611973	0.560619	0.507729	0.522597	0.663385	0.495844	0.733781	0.512046	0.540409	0.540039	0.730474	0.728919
	0.610173	0.574554	0.665461	0.604094	0.562776	0.494661	0.515964	0.668635	0.493179	0.734343	0.504218	0.527905	0.542007	0.740456	0.717193
	0.625964	0.668964	0.664329	0.616034	0.568558	0.526215	0.527667	0.673844	0.480014	0.742547	0.519638	0.571211	0.564714	0.735314	0.739265
	0.640809	0.634048	0.673042	0.612867	0.563952	0.516056	0.524701	0.678028	0.501889	0.753561	0.512755	0.625953	0.549576	0.74209	0.745761
	0.625309	0.617713	0.659319	0.610917	0.5665	0.50012	0.505825	0.656331	0.496798	0.7403	0.51289	0.556267	0.543597	0.738944	0.744956
	0.613448	0.649783	0.685632	0.607912	0.566206	0.500876	0.516881	0.675075	0.494531	0.744008	0.513193	0.568161	0.539434	0.731381	0.743404
	0.62691	0.622209	0.676483	0.616359	0.594727	0.513386	0.529447	0.662975	0.494094	0.7301	0.515353	0.57548	0.546624	0.735495	0.715641
	0.619269	0.628203	0.665636	0.603607	0.585514	0.506932	0.50302	0.661663	0.491031	0.729932	0.510055	0.523635	0.52967	0.74209	0.719204
	0.6101	0.646786	0.681014	0.60515	0.556209	0.501116	0.509061	0.667241	0.481088	0.721559	0.509347	0.543001	0.53739	0.725634	0.722193
	0.618178	0.623108	0.674567	0.610348	0.559737	0.496853	0.512674	0.669333	0.487054	0.739372	0.505399	0.556115	0.534136	0.721217	0.710812
	0.63506	0.623707	0.659275	0.588173	0.56993	0.510837	0.521465	0.671753	0.494929	0.737153	0.518727	0.567094	0.528913	0.726965	0.732655
	0.623272	0.67376	0.672214	0.618877	0.571303	0.498765	0.525348	0.673598	0.494651	0.741676	0.508503	0.578378	0.554117	0.745357	0.728172
	0.611847	0.639293	0.654396	0.605718	0.559247	0.507131	0.516287	0.673229	0.490912	0.739457	0.511506	0.551693	0.528005	0.728538	0.723631
	0.632004	0.674959	0.669469	0.60848	0.592963	0.497809	0.524377	0.650507	0.485065	0.744149	0.515319	0.556725	0.549349	0.732047	0.73185
	0.627783	0.653529	0.676309	0.601982	0.603744	0.491036	0.516449	0.664247	0.495088	0.738333	0.510528	0.55764	0.531487	0.736766	0.719147
	0.612575	0.620111	0.671735	0.609049	0.573263	0.504741	0.51564	0.658956	0.488764	0.730466	0.505095	0.602928	0.509915	0.734346	0.720182
	0.613666	0.594935	0.660495	0.597677	0.577183	0.503944	0.501618	0.656618	0.484469	0.726363	0.501721	0.55032	0.50719	0.723274	0.719607
	0.630476	0.65278	0.675351	0.627325	0.610703	0.51506	0.508575	0.681186	0.496997	0.738642	0.519132	0.621073	0.543143	0.739851	0.740243
	0.62742	0.621909	0.677311	0.637722	0.58669	0.498167	0.51564	0.669292	0.487611	0.731224	0.508976	0.569686	0.548214	0.744631	0.719032
	0.607553	0.608422	0.662673	0.612135	0.547094	0.506892	0.510355	0.657315	0.487452	0.736787	0.515792	0.530955	0.523161	0.722064	0.683739
	0.628147	0.622509	0.667291	0.608643	0.571891	0.498207	0.499461	0.675608	0.488406	0.73128	0.502025	0.543153	0.546246	0.715107	0.731276
	0.64161	0.618912	0.669557	0.625376	0.563756	0.49749	0.535811	0.666339	0.49131	0.739485	0.512215	0.564196	0.533303	0.746083	0.716848
	0.613375	0.613068	0.657968	0.605962	0.581104	0.498685	0.517096	0.670727	0.492622	0.735214	0.508436	0.556725	0.535044	0.718132	0.733632
	0.621307	0.629402	0.671386	0.608561	0.549054	0.503267	0.510409	0.655592	0.495207	0.73277	0.524902	0.545441	0.526264	0.728054	0.711962
	0.643793	0.69444	0.677442	0.612867	0.585906	0.514223	0.547891	0.663796	0.49131	0.740215	0.507288	0.610704	0.56214	0.757699	0.734552
	0.613011	0.586093	0.647077	0.579888	0.567578	0.496454	0.50124	0.655018	0.482003	0.727796	0.518154	0.549863	0.531714	0.737734	0.695522
	0.607044	0.658474	0.660713	0.59922	0.576791	0.493068	0.503344	0.662647	0.489361	0.732601	0.512249	0.55703	0.556615	0.726178	0.719319
	0.619342	0.687547	0.662412	0.607262	0.582966	0.500558	0.510409	0.671671	0.490196	0.740412	0.518795	0.566484	0.539585	0.751225	0.742542
	0.630403	0.627154	0.653394	0.588417	0.560423	0.503825	0.50329	0.652844	0.483156	0.727431	0.517917	0.588899	0.545716	0.75062	0.726102
	0.609955	0.636895	0.670341	0.607343	0.574635	0.496813	0.513806	0.661335	0.488367	0.729988	0.520381	0.584324	0.546473	0.713776	0.717423
	0.620579	0.654129	0.673303	0.622858	0.606194	0.510398	0.521681	0.662401	0.47902	0.730128	0.516939	0.599573	0.537163	0.735737	0.727539
	0.606535	0.628353	0.656313	0.598489	0.54484	0.509801	0.506688	0.65588	0.482798	0.720323	0.509246	0.556572	0.538828	0.728417	0.723228
	0.610246	0.580099	0.650475	0.589392	0.541213	0.497092	0.502589	0.647594	0.481605	0.718187	0.495647	0.505337	0.514381	0.714623	0.71771
	0.629166	0.658325	0.681581	0.627894	0.576693	0.511116	0.502481	0.667733	0.490156	0.732741	0.514273	0.604453	0.545943	0.750197	0.742714
	0.631131	0.660572	0.661758	0.606531	0.570714	0.504861	0.521141	0.658956	0.49131	0.730381	0.505466	0.569533	0.543899	0.730716	0.721274
	0.61876	0.650082	0.666812	0.599626	0.562776	0.497649	0.503236	0.661417	0.490474	0.725998	0.516466	0.579292	0.517257	0.718858	0.722711
	0.616286	0.608722	0.661148	0.605962	0.562874	0.506972	0.513213	0.647553	0.487253	0.720182	0.51262	0.575175	0.524675	0.735677	0.728229
	0.617596	0.656227	0.65457	0.59589	0.564246	0.505976	0.505555	0.659735	0.474406	0.72243	0.516534	0.569228	0.53247	0.730171	0.70357
	0.650851	0.655927	0.673913	0.625457	0.572381	0.508845	0.510085	0.657725	0.490594	0.725858	0.519807	0.588289	0.541023	0.74215	0.734494
	0.628511	0.636895	0.668859	0.594834	0.562972	0.496733	0.506364	0.666626	0.486219	0.721503	0.512114	0.602775	0.539055	0.733378	0.722826
	0.597293	0.580698	0.645857	0.590854	0.549838	0.499044	0.502697	0.655264	0.481923	0.727431	0.495107	0.58219	0.52861	0.708028	0.707363
	0.603769	0.607523	0.665723	0.588254	0.555425	0.509243	0.49973	0.673598	0.485821	0.717906	0.499933	0.556725	0.520512	0.712384	0.729034
	0.611046	0.645287	0.66202	0.587442	0.556503	0.490996	0.49342	0.647923	0.469475	0.716698	0.502126	0.567551	0.507569	0.707121	0.728804
	0.597366	0.663869	0.66764	0.584843	0.565618	0.491076	0.500108	0.650178	0.481645	0.725689	0.498448	0.537206	0.523464	0.720552	0.70857
	0.625455	0.612468	0.660103	0.609617	0.545624	0.500398	0.506094	0.667569	0.479617	0.723947	0.509549	0.557792	0.52914	0.728538	0.724205
	0.625455	0.64259	0.65017	0.574364	0.531314	0.498446	0.516773	0.663098	0.484071	0.727768	0.51235	0.57853	0.545035	0.718858	0.714606
	0.644084	0.667766	0.674436	0.615872	0.572675	0.499283	0.528422	0.679669	0.500577	0.734146	0.508334	0.571821	0.549425	0.716256	0.738863
	0.619415	0.649333	0.661018	0.587929	0.557483	0.492829	0.501834	0.652188	0.482401	0.723357	0.498313	0.599573	0.53353	0.720491	0.722136
	0.601223	0.611869	0.664764	0.596946	0.575811	0.500398	0.502157	0.653542	0.488247	0.717906	0.501957	0.562824	0.522707	0.722125	0.726102
	0.626328	0.628053	0.653219	0.592235	0.552289	0.501275	0.508359	0.660924	0.469634	0.7208	0.50027	0.562062	0.520209	0.713594	0.703627
	0.60668	0.61052	0.654178	0.592722	0.544546	0.497729	0.502157	0.645051	0.489281	0.717232	0.494534	0.550778	0.507645	0.717345	0.727367
	0.627856	0.670913	0.666725	0.616684	0.58473	0.514821	0.515694	0.658012	0.493815	0.727656	0.509819	0.589661	0.538904	0.734648	0.729321
	0.609009	0.590739	0.651782	0.592722	0.54729	0.510598	0.502697	0.651819	0.480293	0.721306	0.511236	0.532784	0.52581	0.720552	0.703455
	0.637971	0.643639	0.666855	0.616765	0.578947	0.510279	0.519793	0.663673	0.482321	0.722739	0.502126	0.542391	0.529064	0.714502	0.737139
	0.595765	0.625805	0.661976	0.586955	0.584632	0.488805	0.510463	0.646815	0.476673	0.716024	0.505264	0.560079	0.540872	0.72763	0.708628
	0.619779	0.582946	0.677877	0.592722	0.543664	0.505498	0.512998	0.655305	0.477986	0.723778	0.514172	0.601098	0.525129	0.729203	0.717135
	0.628293	0.627304	0.659232	0.588417	0.550524	0.503984	0.504476	0.659489	0.48594	0.723891	0.506107	0.593626	0.531411	0.723335	0.733172
	0.622107	0.637794	0.653176	0.597514	0.570322	0.49996	0.487973	0.648456	0.480054	0.734455	0.507558	0.574565	0.527324	0.74693	0.723286
	0.612866	0.629702	0.65261	0.596458	0.563854	0.494223	0.512782	0.651819	0.492503	0.724649	0.504015	0.576395	0.523236	0.708875	0.721446
	0.618396	0.658175	0.66764	0.608886	0.548956	0.500239	0.516018	0.656044	0.483435	0.724088	0.513565	0.587832	0.518619	0.714139	0.726102
	0.612575	0.669114	0.662107	0.600439	0.581398	0.499721	0.505339	0.648415	0.490395	0.726504	0.513531	0.544526	0.545413	0.726904	0.707363
	0.641755	0.643938	0.66263	0.624807	0.556111	0.513267	0.522705	0.666544	0.496082	0.724959	0.513362	0.622598	0.558053	0.745538	0.729896
	0.593072	0.586243	0.646685	0.58931	0.555817	0.504382	0.509546	0.65871	0.490753	0.719283	0.506917	0.546813	0.54125	0.702886	0.70926
	0.605443	0.618612	0.660887	0.58931	0.568656	0.49255	0.498274	0.635946	0.483554	0.713102	0.503813	0.552303	0.523539	0.714804	0.692878
	0.605007	0.680504	0.664024	0.592641	0.54582	0.508367	0.513806	0.661294	0.490952	0.717766	0.51343	0.567551	0.534968	0.715591	0.720009
	0.630403	0.606474	0.662455	0.594103	0.553955	0.50247	0.499676	0.666872	0.485026	0.715434	0.510899	0.573803	0.530124	0.744207	0.706903
	0.625746	0.643938	0.678052	0.594022	0.557581	0.489442	0.503667	0.660227	0.477867	0.720294	0.506782	0.557487	0.52142	0.721641	0.717423
	0.623708	0.624457	0.670907	0.587605	0.568068	0.489681	0.5	0.639309	0.476395	0.703211	0.502969	0.554437	0.533757	0.733499	0.701155
	0.621816	0.638543	0.652348	0.573552	0.539645	0.503705	0.492557	0.642632	0.48598	0.709927	0.503745	0.545898	0.510445	0.690241	0.70081
	0.610028	0.594186	0.644027	0.582487	0.549544	0.488127	0.490238	0.652557	0.479736	0.709955	0.509111	0.50122	0.525431	0.718979	0.716388
	0.607845	0.618013	0.661671	0.587117	0.545428	0.501036	0.496009	0.640212	0.480929	0.715518	0.502936	0.569686	0.543218	0.719826	0.700753
	0.637389	0.648134	0.644768	0.610755	0.555425	0.513785	0.5096	0.647882	0.497156	0.722374	0.510224	0.584324	0.523312	0.716438	0.728919
	0.627638	0.655477	0.66655	0.614004	0.569734	0.501912	0.522759	0.655428	0.479815	0.723778	0.508706	0.574565	0.549046	0.741364	0.714548
	0.623126	0.615765	0.652958	0.597677	0.566892	0.502829	0.510085	0.637259	0.478821	0.710123	0.49288	0.55398	0.540645	0.718374	0.719664
	0.623272	0.591488	0.653263	0.583543	0.54337	0.498486	0.497897	0.650548	0.498349	0.715293	0.510696	0.603385	0.515138	0.711114	0.707938
	0.617232	0.642739	0.661497	0.590529	0.551406	0.505139	0.492989	0.643903	0.481207	0.709449	0.51289	0.565569	0.524372	0.743784	0.708628
	0.62087	0.622359	0.653742	0.576476	0.555523	0.485498	0.500809	0.641893	0.462674	0.724116	0.496963	0.53065	0.531335	0.731623	0.701558
	0.605152	0.61007	0.663414	0.584924	0.548466	0.503227	0.495955	0.651778	0.477111	0.710938	0.502362	0.544221	0.510521	0.717164	0.704604
	0.613448	0.648734	0.653742	0.590285	0.533177	0.497211	0.50329	0.643534	0.473571	0.707033	0.504285	0.566026	0.52089	0.718071	0.727827
	0.616213	0.600779	0.66202	0.565917	0.569636	0.499641	0.50631	0.642221	0.487134	0.703745	0.50108	0.541781	0.527929	0.706576	0.710812
	0.616795	0.62071	0.649821	0.570547	0.525826	0.49239	0.490292	0.652229	0.479298	0.721952	0.512485	0.563891	0.52581	0.722548	0.715986
	0.638844	0.64244	0.64394	0.611648	0.57042	0.509283	0.497411	0.645626	0.481406	0.721418	0.502598	0.580512	0.532016	0.720733	0.701845
	0.615776	0.629852	0.660321	0.592478	0.557679	0.501076	0.49849	0.64177	0.476355	0.704392	0.501147	0.571973	0.531638	0.73489	0.71794
	0.621452	0.634947	0.640847	0.577614	0.554837	0.486773	0.503829	0.646938	0.478742	0.706724	0.499528	0.568314	0.531941	0.726723	0.711962
	0.621089	0.61082	0.662804	0.574527	0.542389	0.498207	0.506202	0.650712	0.477548	0.71091	0.50216	0.595761	0.517938	0.724666	0.700696
	0.617814	0.635696	0.652	0.585005	0.555327	0.500876	0.513429	0.646856	0.491906	0.717316	0.500236	0.555352	0.535422	0.707605	0.707708
	0.622544	0.637494	0.656879	0.576151	0.546114	0.499124	0.50453	0.623477	0.470071	0.709028	0.504488	0.550473	0.511429	0.735979	0.695695
	0.620361	0.659224	0.659188	0.58005	0.573459	0.506693	0.501402	0.648538	0.48944	0.715462	0.500877	0.60003	0.525053	0.728114	0.7161
	0.616795	0.632999	0.638886	0.602632	0.565422	0.503426	0.512242	0.652352	0.493935	0.706386	0.495748	0.580665	0.530427	0.690786	0.73208
	0.614248	0.632999	0.652348	0.593778	0.554445	0.51	0.514292	0.645216	0.478145	0.709646	0.521325	0.563281	0.530578	0.729748	0.714836
	0.604497	0.616964	0.653394	0.595565	0.566696	0.499084	0.50782	0.633731	0.47735	0.706443	0.50135	0.581885	0.525129	0.713776	0.695982
	0.612866	0.580399	0.64712	0.579644	0.533373	0.49502	0.495524	0.624175	0.470827	0.707398	0.488527	0.537054	0.504617	0.697501	0.69558
	0.632586	0.626705	0.65653	0.596134	0.556699	0.501514	0.524701	0.647471	0.486219	0.70633	0.509583	0.575023	0.544429	0.721701	0.713456
	0.616868	0.626555	0.655006	0.573146	0.544252	0.495139	0.490778	0.634962	0.484151	0.70855	0.498617	0.566179	0.531184	0.715893	0.701845
	0.6093	0.632849	0.651172	0.594834	0.549054	0.500518	0.511595	0.624626	0.481128	0.708887	0.499494	0.539341	0.525507	0.707665	0.719492
	0.630185	0.609471	0.658927	0.576882	0.547192	0.493705	0.499569	0.646159	0.482361	0.703914	0.503273	0.548643	0.520739	0.719342	0.72478
	0.62138	0.592387	0.658839	0.576639	0.533667	0.498127	0.510463	0.647923	0.480492	0.70574	0.504589	0.568466	0.518392	0.692903	0.713744
	0.636079	0.634647	0.651085	0.582568	0.524552	0.491554	0.496656	0.64177	0.484389	0.711135	0.505095	0.575633	0.513851	0.723153	0.721101
	0.605079	0.635097	0.644942	0.584112	0.554249	0.510438	0.481879	0.638161	0.475003	0.703717	0.497975	0.5767	0.527021	0.698106	0.718515
	0.608936	0.571107	0.642851	0.563642	0.527982	0.497331	0.495578	0.626718	0.460208	0.707145	0.493994	0.527905	0.518771	0.682437	0.705122
	0.631567	0.647535	0.642067	0.582325	0.549348	0.496972	0.498166	0.645257	0.468878	0.708353	0.505264	0.584782	0.53247	0.724968	0.719664
	0.639135	0.64169	0.664808	0.617984	0.575713	0.502948	0.500647	0.639925	0.491946	0.710011	0.503982	0.555657	0.53686	0.702765	0.712134
	0.609227	0.617114	0.635183	0.55487	0.5468	0.489402	0.493798	0.625159	0.479537	0.696946	0.495006	0.536901	0.511278	0.69853	0.701098
	0.616286	0.645587	0.646641	0.594834	0.545428	0.49761	0.491695	0.629384	0.471264	0.704392	0.509482	0.602775	0.532698	0.688124	0.711904
	0.604934	0.622059	0.656356	0.560962	0.540429	0.492072	0.491479	0.629794	0.47381	0.700683	0.503003	0.563129	0.51597	0.722488	0.69604
	0.617814	0.636296	0.649473	0.592235	0.553563	0.49	0.499515	0.642221	0.467367	0.720519	0.502227	0.550015	0.532698	0.712868	0.713571
	0.629675	0.66342	0.663762	0.622208	0.5665	0.513307	0.520009	0.630532	0.49123	0.707454	0.505365	0.586459	0.550333	0.703128	0.727884
	0.627347	0.680953	0.668729	0.585168	0.570224	0.501873	0.505501	0.652229	0.486895	0.70796	0.500607	0.598353	0.52581	0.718797	0.699948
	0.622981	0.657725	0.652087	0.594753	0.559443	0.498645	0.516827	0.64661	0.484509	0.707763	0.498988	0.573041	0.527551	0.724303	0.711445
	0.629603	0.66267	0.65762	0.601657	0.563266	0.5049	0.517959	0.641811	0.491151	0.710292	0.511641	0.556877	0.520966	0.710448	0.69328
	0.612356	0.624906	0.637057	0.578832	0.543468	0.48761	0.489861	0.640745	0.467088	0.696833	0.501417	0.540256	0.508099	0.712384	0.699776
	0.619924	0.597033	0.643809	0.569978	0.560227	0.482829	0.512027	0.628112	0.48773	0.704335	0.494432	0.565721	0.518695	0.706213	0.682589
	0.615631	0.579799	0.623072	0.561368	0.539449	0.495458	0.489268	0.61712	0.46681	0.691523	0.499629	0.559469	0.504693	0.692903	0.705351
	0.616068	0.62101	0.642067	0.595809	0.53102	0.483028	0.494283	0.630532	0.472458	0.702116	0.504656	0.536292	0.525734	0.726541	0.709605
	0.601732	0.632399	0.654526	0.585005	0.539253	0.494861	0.506741	0.631393	0.474208	0.694867	0.499426	0.533394	0.526794	0.70095	0.699776
	0.614903	0.632849	0.668685	0.59191	0.536215	0.50251	0.509061	0.637218	0.487929	0.70206	0.490923	0.612382	0.530957	0.745478	0.710812
	0.602751	0.59973	0.640629	0.590854	0.524944	0.489801	0.495146	0.627784	0.480531	0.702144	0.504589	0.512351	0.512337	0.69006	0.688452
	0.61876	0.616514	0.651128	0.604825	0.568068	0.492908	0.521734	0.619253	0.480571	0.703914	0.499595	0.593169	0.514532	0.696291	0.68782
	0.607699	0.640492	0.647295	0.582244	0.54876	0.490916	0.501834	0.634182	0.471702	0.699952	0.501181	0.535682	0.51809	0.699256	0.682819
	0.623417	0.590289	0.648819	0.557713	0.530236	0.482151	0.500701	0.643739	0.476276	0.69821	0.497773	0.529887	0.512791	0.699074	0.689027
	0.608208	0.607673	0.644419	0.581919	0.542586	0.491235	0.497573	0.633034	0.462037	0.693574	0.49639	0.519366	0.508553	0.714683	0.692361
	0.603769	0.602877	0.650301	0.564779	0.535823	0.489761	0.504422	0.622452	0.465338	0.698828	0.493386	0.560079	0.491901	0.697622	0.686613
	0.611483	0.650232	0.637492	0.582812	0.545232	0.493466	0.486409	0.632132	0.471901	0.696524	0.498279	0.537511	0.525129	0.702402	0.713916
	0.630258	0.671962	0.657837	0.602307	0.568264	0.491394	0.513267	0.632788	0.481247	0.694951	0.501451	0.570448	0.547987	0.721883	0.730643
	0.618542	0.594935	0.645073	0.570872	0.569342	0.499004	0.495308	0.628522	0.478264	0.695766	0.502058	0.571973	0.516273	0.716377	0.716215
	0.581429	0.615765	0.635009	0.582081	0.534549	0.490717	0.492665	0.623682	0.470787	0.695681	0.495613	0.541781	0.529594	0.684312	0.687417
	0.600786	0.638094	0.635575	0.5582	0.541017	0.498367	0.496494	0.625118	0.470708	0.687449	0.501316	0.539494	0.534287	0.68044	0.689602
	0.579683	0.565862	0.638451	0.563155	0.502009	0.493028	0.483173	0.614495	0.458816	0.678627	0.483466	0.538884	0.491826	0.6828	0.696902
	0.624072	0.622059	0.659057	0.584924	0.535627	0.484263	0.513321	0.621262	0.471901	0.695176	0.49919	0.545288	0.525431	0.711295	0.708053
	0.624945	0.659074	0.643896	0.592559	0.561207	0.505936	0.495901	0.641524	0.48419	0.699166	0.50216	0.564501	0.544278	0.726723	0.700696
	0.612793	0.6315	0.637623	0.576395	0.556601	0.493466	0.511218	0.620975	0.477668	0.689781	0.498752	0.54971	0.523312	0.715288	0.698569
	0.628002	0.624756	0.651433	0.584031	0.546996	0.505657	0.491425	0.626718	0.478225	0.703605	0.492374	0.57914	0.523918	0.713473	0.701615
	0.625164	0.649633	0.643809	0.564861	0.574243	0.487729	0.511919	0.624749	0.479895	0.685651	0.4945	0.540104	0.514532	0.722548	0.690234
	0.601877	0.657126	0.640455	0.572009	0.526806	0.499602	0.490292	0.626594	0.484707	0.687477	0.493218	0.545441	0.531865	0.718918	0.694488
	0.615413	0.657126	0.630304	0.575826	0.536313	0.488845	0.499946	0.615561	0.476594	0.697901	0.496491	0.540256	0.516424	0.707786	0.698339
	0.623417	0.613367	0.640455	0.582975	0.571597	0.481235	0.505285	0.630778	0.474208	0.700008	0.496322	0.573803	0.530881	0.723516	0.686613
	0.603551	0.622059	0.62512	0.572659	0.54386	0.495737	0.487811	0.618104	0.475639	0.687393	0.486739	0.55032	0.519528	0.69133	0.696672
	0.612502	0.636146	0.63697	0.559743	0.520043	0.488725	0.488351	0.625282	0.4651	0.677306	0.497503	0.555657	0.523161	0.700587	0.709203
	0.617523	0.595834	0.629215	0.569409	0.526512	0.489243	0.493582	0.626266	0.474406	0.688432	0.498684	0.541934	0.518241	0.694295	0.681267
	0.615631	0.593436	0.640368	0.597271	0.530432	0.48757	0.497196	0.631803	0.471344	0.685398	0.492374	0.535072	0.547003	0.728175	0.690981
	0.595838	0.585943	0.633005	0.559012	0.520533	0.484821	0.472009	0.616997	0.460963	0.674637	0.48927	0.518451	0.505677	0.710932	0.660114
	0.620725	0.646636	0.635837	0.582812	0.534745	0.49012	0.491371	0.629753	0.474287	0.684077	0.496524	0.57975	0.530276	0.710388	0.681382
	0.614394	0.613817	0.633789	0.567704	0.531804	0.496693	0.503991	0.619294	0.469952	0.696946	0.499291	0.589204	0.526415	0.71426	0.702707
	0.613593	0.621609	0.630653	0.582081	0.533863	0.489841	0.503506	0.615438	0.474208	0.683796	0.485794	0.586612	0.544732	0.700163	0.698339
	0.617887	0.61052	0.640978	0.557875	0.5271	0.501713	0.494553	0.625446	0.469196	0.67916	0.497975	0.570448	0.515062	0.693811	0.688739
	0.602896	0.595834	0.630958	0.565429	0.535627	0.496534	0.490292	0.612198	0.469435	0.6836	0.498718	0.559469	0.53951	0.698772	0.685865
	0.611847	0.645137	0.632657	0.569653	0.537489	0.491275	0.507658	0.621057	0.464742	0.691411	0.502699	0.541629	0.506661	0.693327	0.690924
	0.630258	0.642739	0.648602	0.572577	0.546408	0.493068	0.506849	0.625733	0.469753	0.683937	0.491058	0.58402	0.509764	0.70464	0.699258
	0.594746	0.577102	0.633223	0.562099	0.517005	0.488048	0.472495	0.62196	0.454639	0.666685	0.497705	0.540561	0.484787	0.701434	0.693625
	0.615267	0.666866	0.649996	0.579482	0.550034	0.494462	0.512674	0.643698	0.475321	0.69512	0.50793	0.587984	0.526264	0.731684	0.711617
	0.609664	0.650382	0.623334	0.571765	0.549446	0.497052	0.492881	0.632624	0.468958	0.687561	0.490653	0.569228	0.528005	0.716014	0.691671
	0.618251	0.6312	0.633354	0.541629	0.540821	0.486295	0.495847	0.631475	0.470867	0.67253	0.496794	0.538121	0.519603	0.695565	0.673622
	0.625964	0.657725	0.636621	0.585574	0.556209	0.497251	0.511541	0.629425	0.478145	0.686775	0.488696	0.555657	0.531259	0.710025	0.687072
	0.634333	0.622209	0.637318	0.573552	0.541703	0.485458	0.494876	0.621919	0.469475	0.687899	0.494635	0.52882	0.508326	0.70821	0.685348
	0.614903	0.637644	0.629868	0.578345	0.514359	0.480319	0.477672	0.615315	0.479179	0.679189	0.504285	0.54788	0.524372	0.705245	0.680807
	0.609809	0.607972	0.621025	0.567216	0.534941	0.490438	0.489268	0.627292	0.468878	0.683937	0.49811	0.548033	0.528762	0.71553	0.680577
	0.616795	0.604076	0.636447	0.549752	0.528668	0.488645	0.487973	0.630737	0.465696	0.674637	0.489439	0.546508	0.505904	0.690544	0.683739
	0.596856	0.626705	0.637972	0.560881	0.521807	0.489761	0.48231	0.63127	0.481327	0.681099	0.505365	0.542086	0.527778	0.691875	0.684658
	0.61534	0.62116	0.629433	0.572334	0.519651	0.493227	0.492665	0.622288	0.476713	0.675171	0.487886	0.551998	0.516803	0.707302	0.675634
	0.600349	0.620111	0.62647	0.560962	0.511614	0.486454	0.487704	0.612485	0.462196	0.666742	0.487211	0.556267	0.512035	0.66828	0.710755
	0.606826	0.64184	0.632439	0.565186	0.520043	0.493466	0.502643	0.625241	0.465458	0.674777	0.486807	0.520891	0.537542	0.697441	0.67799
	0.591471	0.611569	0.634791	0.551458	0.499853	0.490159	0.482796	0.62155	0.473889	0.669355	0.492982	0.516011	0.519301	0.698409	0.685635
	0.617596	0.581747	0.638364	0.558444	0.553073	0.507331	0.512674	0.620811	0.466571	0.677362	0.490754	0.564196	0.527778	0.727993	0.688107
	0.612575	0.543534	0.62891	0.532694	0.541997	0.491873	0.49493	0.608425	0.467208	0.668736	0.49639	0.541934	0.501211	0.685946	0.677301
	0.575971	0.585344	0.611789	0.525384	0.486818	0.476016	0.482095	0.605759	0.446605	0.665084	0.477797	0.493596	0.482365	0.671002	0.650859
	0.628875	0.586393	0.64394	0.558362	0.512594	0.491394	0.487973	0.619253	0.459651	0.668989	0.489911	0.516468	0.516349	0.687095	0.685808
	0.603551	0.612318	0.641457	0.581025	0.51279	0.492829	0.497303	0.611296	0.467446	0.674749	0.498988	0.536444	0.515592	0.706092	0.675691
	0.603042	0.59973	0.637623	0.54764	0.522101	0.486534	0.489214	0.61105	0.465418	0.672839	0.498178	0.576853	0.509461	0.693992	0.685923
	0.618833	0.608572	0.622375	0.563967	0.52514	0.485339	0.503074	0.602477	0.467884	0.664494	0.493353	0.520891	0.527021	0.692903	0.680692
	0.613739	0.641091	0.654831	0.552514	0.559835	0.493466	0.496548	0.613593	0.477071	0.682897	0.479181	0.535834	0.514608	0.707726	0.693223
	0.613448	0.586693	0.641805	0.567135	0.514163	0.486614	0.491101	0.625487	0.467923	0.669242	0.49504	0.562977	0.510596	0.687882	0.695062
	0.586523	0.565713	0.628779	0.525546	0.529452	0.487809	0.491425	0.601411	0.471583	0.661937	0.481003	0.527142	0.489025	0.669792	0.672932
	0.608718	0.647685	0.633789	0.569328	0.539057	0.504422	0.502535	0.612731	0.473889	0.670984	0.500709	0.591339	0.523993	0.689031	0.693568
	0.610392	0.615765	0.63954	0.558687	0.537685	0.498287	0.493852	0.623682	0.479975	0.678992	0.499831	0.568771	0.514835	0.694416	0.691039
	0.595183	0.584595	0.632613	0.553976	0.517299	0.488645	0.502858	0.60338	0.465139	0.663089	0.501451	0.541171	0.491826	0.69254	0.697419
	0.602169	0.654728	0.629433	0.565917	0.534353	0.491394	0.491209	0.604856	0.46502	0.668765	0.495006	0.55032	0.548592	0.697199	0.695465
	0.632077	0.622059	0.641021	0.571846	0.536803	0.489641	0.490886	0.624257	0.462156	0.664606	0.485929	0.587832	0.520058	0.698288	0.677473
	0.598021	0.586243	0.618846	0.567704	0.508674	0.497968	0.50631	0.617817	0.468083	0.667894	0.487178	0.534462	0.511202	0.689152	0.67092
	0.610464	0.615315	0.641021	0.542279	0.535431	0.49	0.489052	0.609901	0.470787	0.658734	0.493015	0.508234	0.520512	0.654426	0.655975
	0.589434	0.612918	0.615928	0.539111	0.50838	0.487928	0.495632	0.594479	0.457304	0.659942	0.481509	0.520891	0.492355	0.674693	0.665977
	0.587178	0.584145	0.622724	0.540655	0.511418	0.480677	0.484468	0.607891	0.467526	0.649827	0.489708	0.519518	0.496897	0.682013	0.684946
	0.576263	0.598681	0.627559	0.574852	0.552289	0.485976	0.501079	0.607645	0.468441	0.665702	0.500135	0.539189	0.524069	0.691149	0.679715
	0.624145	0.590139	0.627255	0.545203	0.545232	0.487649	0.50631	0.616874	0.463071	0.664438	0.501552	0.55032	0.499016	0.703309	0.687187
	0.596929	0.616514	0.633528	0.551458	0.520337	0.490717	0.502858	0.613552	0.473969	0.658228	0.496423	0.537816	0.496216	0.695384	0.707651
	0.612502	0.627154	0.618498	0.574608	0.5271	0.491912	0.480585	0.613428	0.454321	0.653255	0.484681	0.534767	0.524675	0.699921	0.674139
	0.609082	0.603926	0.629433	0.547803	0.525336	0.481155	0.478589	0.597761	0.45106	0.663623	0.48431	0.533242	0.482365	0.666102	0.664023
	0.597802	0.576502	0.625599	0.544635	0.527198	0.495259	0.483713	0.620729	0.472656	0.67857	0.493285	0.541324	0.513321	0.67917	0.665
	0.590962	0.569009	0.629825	0.562343	0.502597	0.495339	0.485169	0.621057	0.470071	0.660335	0.487448	0.551693	0.514608	0.68764	0.675864
	0.613666	0.613667	0.637318	0.536756	0.536999	0.483625	0.496279	0.621468	0.476634	0.663539	0.488291	0.531412	0.516349	0.694053	0.68667
	0.60799	0.625506	0.644594	0.553408	0.529256	0.492789	0.487811	0.605061	0.471264	0.662977	0.485356	0.528972	0.495913	0.675177	0.686038
	0.618251	0.601379	0.630609	0.578101	0.540135	0.493068	0.479021	0.61429	0.459174	0.65702	0.508267	0.554437	0.530048	0.707302	0.675979
	0.619342	0.581747	0.626775	0.546259	0.534157	0.487012	0.490077	0.611952	0.469554	0.659436	0.492847	0.562062	0.506812	0.711295	0.667816
	0.619488	0.601828	0.633528	0.54959	0.530824	0.489163	0.494984	0.606169	0.464463	0.652525	0.488156	0.537664	0.522934	0.673422	0.685348
	0.622398	0.660872	0.62586	0.577451	0.556895	0.490398	0.491856	0.626389	0.477111	0.664297	0.495242	0.598353	0.507947	0.711174	0.665517
	0.624436	0.649933	0.624902	0.578994	0.557581	0.502271	0.500108	0.611788	0.473889	0.654604	0.49838	0.609485	0.52687	0.704701	0.689717
	0.602387	0.624756	0.63649	0.539924	0.50544	0.486932	0.473196	0.603052	0.45973	0.648675	0.497705	0.513266	0.519906	0.671305	0.688739
	0.619415	0.647535	0.635358	0.556251	0.536999	0.501394	0.498328	0.622411	0.466372	0.657638	0.491935	0.596981	0.535952	0.706092	0.688797
	0.613448	0.61097	0.62708	0.563886	0.511418	0.488725	0.48889	0.607276	0.471463	0.655334	0.490856	0.551388	0.514986	0.695686	0.667356
	0.606971	0.612468	0.629389	0.536025	0.549348	0.495538	0.491587	0.606743	0.463549	0.644685	0.485558	0.535529	0.499167	0.671063	0.660459
	0.604861	0.614416	0.611571	0.562343	0.52906	0.48753	0.489429	0.609655	0.457344	0.651344	0.494601	0.521348	0.52581	0.681348	0.657642
	0.601659	0.636146	0.624336	0.528146	0.500931	0.476733	0.490616	0.614618	0.461083	0.651457	0.48485	0.55581	0.489252	0.687458	0.658332
	0.607917	0.624457	0.623508	0.58005	0.51328	0.49494	0.488459	0.614864	0.475321	0.648507	0.488224	0.52699	0.500454	0.691028	0.692591
	0.584995	0.60003	0.615405	0.534238	0.501617	0.49243	0.481879	0.588245	0.457105	0.636987	0.494804	0.535987	0.500151	0.679593	0.667471
	0.61665	0.653679	0.646249	0.55024	0.530726	0.498406	0.492018	0.608384	0.480213	0.6523	0.50189	0.578683	0.517106	0.683586	0.67914
	0.601004	0.597482	0.630565	0.552189	0.533373	0.49008	0.498382	0.600509	0.466929	0.656346	0.492172	0.542391	0.527853	0.70343	0.662471
	0.593436	0.595384	0.618367	0.528064	0.504459	0.486972	0.484414	0.60018	0.456469	0.651991	0.492374	0.522263	0.502346	0.675177	0.663218
	0.60537	0.61037	0.631655	0.552758	0.541997	0.483904	0.511164	0.612977	0.465458	0.647917	0.497334	0.57731	0.509385	0.689697	0.683681
	0.602314	0.587292	0.631175	0.554707	0.514359	0.480797	0.486841	0.60662	0.458935	0.649968	0.498347	0.569228	0.508477	0.697259	0.672185
	0.611265	0.600629	0.619413	0.561693	0.528962	0.486574	0.485061	0.60662	0.476872	0.652047	0.50162	0.536444	0.523236	0.704761	0.681209
	0.597802	0.566312	0.627255	0.548371	0.527982	0.488566	0.466562	0.602764	0.4581	0.641342	0.490788	0.502287	0.496291	0.671486	0.67322
	0.619051	0.608272	0.633223	0.560881	0.511614	0.491195	0.48738	0.612034	0.457026	0.648422	0.500844	0.5276	0.499546	0.666828	0.681497
	0.609373	0.587892	0.62207	0.541873	0.514751	0.492271	0.493798	0.599893	0.475043	0.648282	0.490889	0.536139	0.484862	0.674269	0.686325
	0.614976	0.604076	0.631655	0.548534	0.515437	0.500518	0.496171	0.596776	0.469753	0.640527	0.496356	0.551388	0.504693	0.684736	0.669368
	0.590671	0.607673	0.612617	0.537487	0.495443	0.480199	0.492881	0.5937	0.461997	0.638982	0.49504	0.487649	0.506509	0.65733	0.65632
	0.613011	0.605575	0.626253	0.557794	0.512104	0.494263	0.482688	0.604897	0.461441	0.652862	0.499494	0.54849	0.509764	0.67796	0.677416
	0.621452	0.62101	0.638451	0.560231	0.537195	0.498446	0.481933	0.599032	0.464622	0.645191	0.495782	0.600793	0.531487	0.680259	0.689544
	0.609955	0.602278	0.615623	0.531395	0.533275	0.488964	0.484468	0.604692	0.463469	0.632913	0.495681	0.546508	0.524599	0.681348	0.667529
	0.577791	0.574105	0.62194	0.543498	0.518573	0.482191	0.49369	0.593987	0.462594	0.638448	0.492172	0.550625	0.503406	0.659689	0.65724
	0.593145	0.563465	0.637318	0.551133	0.508772	0.471633	0.482364	0.599483	0.466054	0.627322	0.486773	0.532174	0.489479	0.668098	0.665402
	0.585795	0.609621	0.617322	0.538543	0.503675	0.486255	0.488998	0.59735	0.454759	0.631396	0.496187	0.549863	0.511051	0.669913	0.656205
	0.614612	0.646935	0.63453	0.548209	0.543566	0.490757	0.49493	0.601124	0.466969	0.641426	0.500472	0.562519	0.534287	0.723093	0.680692
	0.589943	0.616964	0.635706	0.536999	0.521023	0.492151	0.472872	0.607153	0.466452	0.628811	0.494028	0.553065	0.523236	0.681045	0.651951
	0.594237	0.6312	0.624031	0.547965	0.527296	0.495139	0.49342	0.603011	0.472418	0.635835	0.512114	0.562214	0.525204	0.704156	0.682474
	0.59249	0.629552	0.629912	0.557306	0.518181	0.488247	0.481124	0.601329	0.461799	0.646596	0.491227	0.563586	0.513397	0.689697	0.667529
	0.59853	0.56796	0.623246	0.535862	0.500245	0.476175	0.475191	0.607112	0.462594	0.636565	0.486604	0.531717	0.505298	0.685462	0.658792
	0.602969	0.611269	0.625163	0.539274	0.495148	0.495976	0.476971	0.59493	0.460963	0.634542	0.491261	0.540714	0.515213	0.694113	0.670173
	0.580993	0.601079	0.616973	0.539599	0.502205	0.48741	0.486086	0.590788	0.464463	0.63724	0.485592	0.52699	0.50878	0.684191	0.670288
	0.597948	0.64184	0.635924	0.542604	0.532098	0.48996	0.496009	0.601411	0.465975	0.630384	0.494095	0.58036	0.528989	0.70464	0.68552
	0.598676	0.604676	0.61889	0.523434	0.515927	0.489522	0.469798	0.583528	0.453645	0.632014	0.486031	0.538731	0.510218	0.684675	0.648848
	0.599622	0.564664	0.625686	0.526196	0.505342	0.484422	0.491479	0.603544	0.461719	0.633081	0.486334	0.573346	0.501741	0.687216	0.693453
	0.599403	0.595684	0.618149	0.547234	0.491718	0.483108	0.472387	0.601411	0.461639	0.624315	0.488494	0.569228	0.492507	0.653095	0.662643
	0.589434	0.554024	0.616058	0.533263	0.497305	0.487928	0.485816	0.597309	0.455077	0.628698	0.477932	0.507777	0.505525	0.675177	0.651894
	0.59722	0.6315	0.613706	0.535943	0.525042	0.487131	0.497303	0.599606	0.460725	0.624905	0.496457	0.540409	0.525507	0.685522	0.652469
	0.594309	0.587742	0.626688	0.546016	0.529452	0.494223	0.494337	0.60338	0.468958	0.628136	0.48431	0.544983	0.513018	0.692359	0.675346
	0.583758	0.604226	0.618716	0.549833	0.500441	0.47494	0.490131	0.591321	0.463668	0.624062	0.478168	0.527905	0.498789	0.680682	0.649997
	0.581939	0.580548	0.622462	0.538218	0.509066	0.473865	0.491047	0.605677	0.463986	0.627715	0.497672	0.540714	0.521798	0.662593	0.652526
	0.606826	0.613817	0.609654	0.548209	0.534745	0.489323	0.501133	0.59571	0.466611	0.627602	0.485052	0.563281	0.501741	0.685462	0.680807
	0.619852	0.624756	0.630609	0.550727	0.514653	0.485378	0.509654	0.60338	0.454043	0.632576	0.493319	0.525465	0.508326	0.679654	0.669828
	0.591835	0.569459	0.61523	0.525059	0.523179	0.474821	0.486355	0.576802	0.447799	0.627097	0.477055	0.536444	0.514154	0.66344	0.675346
	0.581575	0.574854	0.622549	0.528877	0.513476	0.48247	0.476702	0.587589	0.454321	0.625804	0.487178	0.515554	0.497275	0.663803	0.648618
	0.589725	0.537389	0.61584	0.49671	0.462315	0.473825	0.459443	0.583979	0.456429	0.621449	0.474592	0.513114	0.500076	0.652974	0.65793
	0.621161	0.586093	0.6239	0.537568	0.505734	0.485817	0.484522	0.603708	0.460725	0.629204	0.487988	0.549558	0.499697	0.678323	0.679485
	0.604133	0.57845	0.623944	0.552514	0.512496	0.489602	0.486733	0.596489	0.45273	0.622601	0.485592	0.560537	0.489631	0.664106	0.673737
	0.6093	0.618462	0.622201	0.531801	0.516417	0.478446	0.495254	0.595341	0.466054	0.62617	0.496457	0.552912	0.514002	0.674148	0.664827
	0.595546	0.58909	0.617278	0.525303	0.529746	0.471514	0.482256	0.585333	0.461958	0.627912	0.485221	0.5491	0.507569	0.669187	0.681382
	0.621161	0.62071	0.623639	0.54098	0.518965	0.489124	0.491317	0.593782	0.47035	0.634374	0.498144	0.575785	0.50492	0.677476	0.687647
	0.595546	0.639293	0.636316	0.545366	0.527296	0.487371	0.497735	0.586727	0.47202	0.630272	0.499325	0.541781	0.518619	0.663864	0.662183
	0.59169	0.587442	0.609306	0.543823	0.526708	0.476375	0.48614	0.601411	0.455037	0.628052	0.488359	0.540256	0.515441	0.669974	0.657297
	0.602314	0.605725	0.618541	0.528227	0.533863	0.477331	0.497897	0.599196	0.461162	0.623135	0.487313	0.530955	0.494702	0.659024	0.657757
	0.615049	0.606474	0.631437	0.518073	0.516613	0.478805	0.485385	0.58238	0.457225	0.625608	0.484175	0.537206	0.515213	0.67312	0.663563
	0.601514	0.543384	0.616842	0.527577	0.533863	0.473865	0.490886	0.599524	0.457583	0.624652	0.490451	0.5491	0.494323	0.644867	0.649997
	0.595474	0.632849	0.633136	0.541386	0.532588	0.498765	0.489699	0.59247	0.459174	0.620325	0.498853	0.570601	0.514608	0.67923	0.65724
	0.581138	0.60018	0.606692	0.529526	0.532784	0.474422	0.473843	0.587343	0.46335	0.610548	0.493656	0.52455	0.524372	0.657935	0.645686
	0.603187	0.619811	0.621896	0.554139	0.54533	0.486653	0.48231	0.587343	0.456588	0.615099	0.490181	0.567551	0.520133	0.66096	0.666609
	0.618032	0.603776	0.623203	0.528552	0.522493	0.483386	0.483227	0.589886	0.454759	0.629682	0.497874	0.582952	0.511429	0.673301	0.661551
	0.598457	0.596134	0.622462	0.522785	0.515535	0.476295	0.486895	0.592962	0.461997	0.622742	0.489607	0.536749	0.489404	0.661867	0.657872
	0.592854	0.571257	0.618106	0.497604	0.485739	0.481355	0.497303	0.58361	0.455634	0.610997	0.489304	0.528057	0.489706	0.665921	0.657815
	0.612138	0.597632	0.629738	0.547965	0.525434	0.488327	0.487326	0.602354	0.470787	0.615493	0.504049	0.559317	0.510975	0.672636	0.660861
	0.589361	0.602128	0.617757	0.542604	0.515829	0.477331	0.493474	0.592429	0.457622	0.612964	0.483837	0.540409	0.511505	0.676024	0.663505
	0.587396	0.579949	0.620676	0.542848	0.511124	0.478884	0.478158	0.578811	0.453168	0.614565	0.497301	0.506404	0.501968	0.652369	0.635972
	0.596056	0.603477	0.624292	0.540573	0.512202	0.477928	0.473843	0.583938	0.457821	0.612177	0.491834	0.555352	0.525583	0.67318	0.653044
	0.587324	0.601978	0.6151	0.535781	0.505538	0.481633	0.484252	0.59329	0.467764	0.614931	0.493488	0.562824	0.499243	0.678565	0.644824
	0.595328	0.592987	0.609523	0.524084	0.491816	0.473825	0.494337	0.593167	0.458855	0.620353	0.493454	0.520586	0.498108	0.657088	0.653561
	0.584049	0.576802	0.601507	0.523272	0.504361	0.463825	0.483012	0.584513	0.458816	0.614537	0.472027	0.507167	0.477899	0.636155	0.644536
	0.594382	0.607972	0.608696	0.524815	0.482407	0.478287	0.493312	0.592429	0.459412	0.61642	0.48485	0.556725	0.515062	0.677415	0.642582
	0.588342	0.60003	0.616494	0.521891	0.482505	0.462629	0.492072	0.585948	0.445333	0.620972	0.480092	0.540866	0.500908	0.672817	0.631948
	0.587978	0.625056	0.615143	0.533994	0.5123	0.476773	0.496225	0.588163	0.456429	0.623276	0.494635	0.551693	0.511353	0.647468	0.661148
	0.600786	0.615615	0.612573	0.514987	0.501813	0.48004	0.489375	0.580001	0.464861	0.618752	0.49612	0.510217	0.495837	0.673241	0.660056
	0.597802	0.560767	0.613314	0.520266	0.50691	0.478446	0.486841	0.585579	0.458577	0.628473	0.49342	0.549863	0.497275	0.668703	0.682531
	0.610901	0.576203	0.611266	0.51653	0.502205	0.482789	0.478158	0.580862	0.45106	0.605912	0.490856	0.54971	0.503406	0.656362	0.655918
	0.610173	0.615915	0.611658	0.525303	0.505636	0.483625	0.493528	0.580165	0.449986	0.617712	0.48738	0.506404	0.501514	0.67197	0.66385
	0.587542	0.574254	0.619326	0.531963	0.490052	0.48502	0.482149	0.587014	0.456588	0.611081	0.479586	0.503812	0.506358	0.652369	0.651664
	0.608572	0.582347	0.612355	0.53635	0.49064	0.483506	0.491209	0.585456	0.465656	0.603776	0.49558	0.539799	0.512035	0.649525	0.654826
	0.59773	0.561666	0.612181	0.500609	0.513574	0.477371	0.466724	0.576391	0.464662	0.60327	0.486942	0.50366	0.50772	0.645472	0.651607
	0.595765	0.599281	0.613314	0.521485	0.500049	0.483625	0.478751	0.586727	0.446725	0.616195	0.498482	0.496188	0.521874	0.659992	0.652584
	0.61796	0.618163	0.624423	0.53172	0.538371	0.493745	0.495632	0.598458	0.477071	0.622461	0.50766	0.608417	0.536709	0.686793	0.679427
	0.618396	0.611569	0.634138	0.531313	0.522003	0.490199	0.490077	0.586563	0.461878	0.617937	0.49396	0.564044	0.488193	0.667554	0.653906
	0.606244	0.5792	0.625686	0.534725	0.497305	0.482351	0.481771	0.580452	0.449787	0.608553	0.508098	0.559469	0.500076	0.64408	0.645801
	0.59642	0.556871	0.609001	0.519942	0.512888	0.489163	0.483227	0.57713	0.452532	0.603523	0.48954	0.556115	0.500984	0.641297	0.662068
	0.610537	0.573205	0.613488	0.541954	0.521709	0.485219	0.48614	0.588696	0.456389	0.607822	0.489405	0.529887	0.49455	0.667312	0.647123
	0.605079	0.590889	0.60948	0.52912	0.50691	0.478127	0.5	0.567204	0.468321	0.608075	0.487009	0.517536	0.530881	0.66707	0.646893
	0.587251	0.571107	0.616712	0.542198	0.501813	0.484303	0.491263	0.584554	0.445293	0.609311	0.481509	0.537511	0.513927	0.656967	0.641662
	0.598312	0.552525	0.609131	0.530745	0.491816	0.481713	0.500324	0.576391	0.450941	0.602034	0.482386	0.500915	0.511353	0.660718	0.636317
	0.618833	0.571107	0.626862	0.535294	0.518377	0.494143	0.506957	0.584595	0.459691	0.619679	0.49423	0.581885	0.50984	0.6658	0.646318
	0.581356	0.599281	0.606082	0.533425	0.506616	0.481116	0.493744	0.579427	0.471781	0.607822	0.492307	0.561909	0.514986	0.658056	0.638788
	0.5938	0.559119	0.611745	0.517261	0.489954	0.471195	0.489483	0.576309	0.441793	0.604956	0.485288	0.528972	0.486225	0.655515	0.64172
	0.60668	0.619811	0.615361	0.552676	0.521415	0.478406	0.484306	0.57672	0.461878	0.608131	0.493386	0.553217	0.515516	0.660234	0.650399
	0.589652	0.573056	0.606561	0.501178	0.499461	0.473665	0.478319	0.574054	0.456031	0.595628	0.477089	0.493748	0.491523	0.656301	0.632178
	0.592636	0.606324	0.61083	0.539274	0.51034	0.49251	0.487488	0.57311	0.453247	0.608075	0.476954	0.542543	0.494248	0.651885	0.689257
	0.616868	0.606923	0.610874	0.535862	0.53151	0.489562	0.487919	0.579919	0.463787	0.612486	0.492779	0.570296	0.512489	0.663198	0.640915
	0.591762	0.598831	0.603076	0.53773	0.513966	0.479004	0.491101	0.577704	0.451696	0.606951	0.483837	0.527295	0.502044	0.658177	0.648043
	0.587542	0.583695	0.602596	0.496142	0.486426	0.481873	0.469529	0.564661	0.450782	0.601922	0.492138	0.564196	0.493415	0.643354	0.6554
	0.598166	0.596284	0.61584	0.50995	0.519553	0.483068	0.487056	0.57069	0.458855	0.593465	0.489101	0.521195	0.495459	0.663682	0.640455
	0.612647	0.58984	0.624771	0.511819	0.500147	0.487928	0.4952	0.583733	0.46852	0.607541	0.485389	0.532937	0.524523	0.683163	0.654538
	0.597147	0.637644	0.614228	0.541142	0.504557	0.488606	0.490832	0.579632	0.462634	0.605322	0.48404	0.500305	0.511126	0.664045	0.639076
	0.619779	0.611569	0.609698	0.507351	0.508086	0.479562	0.463974	0.573315	0.457781	0.600826	0.47881	0.529582	0.500908	0.663622	0.64994
	0.590089	0.561367	0.598588	0.501097	0.469274	0.478486	0.488189	0.570936	0.464145	0.594195	0.482757	0.513114	0.504163	0.635489	0.641203
	0.591253	0.553274	0.614403	0.520835	0.493482	0.477052	0.47476	0.567819	0.45281	0.602624	0.486064	0.511741	0.491144	0.659266	0.649997
	0.593727	0.595834	0.608129	0.519292	0.51279	0.478884	0.48889	0.573479	0.459651	0.597792	0.495782	0.539646	0.507872	0.661081	0.649767
	0.604861	0.607073	0.612878	0.511331	0.494168	0.477769	0.485277	0.570362	0.458299	0.605603	0.49504	0.572278	0.519528	0.637849	0.653963
	0.615122	0.612768	0.623682	0.513362	0.484955	0.479283	0.470823	0.582175	0.462077	0.595516	0.492847	0.548643	0.502725	0.647166	0.647928
	0.603769	0.549378	0.621896	0.521729	0.508772	0.478406	0.492611	0.580534	0.461838	0.597005	0.484917	0.5491	0.489933	0.654789	0.662758
	0.595838	0.596583	0.6195	0.516286	0.51279	0.476932	0.483551	0.577581	0.449787	0.604394	0.491024	0.541171	0.509537	0.654607	0.647928
	0.604643	0.61022	0.603206	0.517099	0.501519	0.480837	0.483497	0.584882	0.463906	0.600938	0.482892	0.533699	0.507417	0.683949	0.642754
	0.613812	0.615615	0.615013	0.51523	0.524454	0.466892	0.491533	0.568352	0.45631	0.600461	0.494432	0.559774	0.49561	0.642084	0.659654
	0.596929	0.595984	0.605733	0.500853	0.500245	0.476813	0.477241	0.574423	0.443503	0.592762	0.488392	0.580207	0.491977	0.639059	0.630339
	0.59249	0.534093	0.596715	0.492893	0.479173	0.470956	0.478535	0.578237	0.456986	0.591695	0.47854	0.5	0.486982	0.636881	0.630454
	0.568549	0.538289	0.601202	0.511737	0.444085	0.475578	0.458527	0.568845	0.442588	0.583715	0.484343	0.512656	0.497275	0.635852	0.632063
	0.627638	0.644238	0.62634	0.559418	0.50887	0.498725	0.497681	0.599401	0.464941	0.598101	0.502969	0.561452	0.528232	0.678081	0.673162
	0.579028	0.527199	0.591357	0.484851	0.494462	0.473944	0.464891	0.56261	0.450742	0.586862	0.478168	0.489021	0.472525	0.63313	0.629879
	0.592417	0.58999	0.623595	0.521729	0.505832	0.48502	0.494553	0.579016	0.456906	0.600096	0.492408	0.52638	0.518468	0.648497	0.650974
	0.593582	0.579949	0.603337	0.500934	0.490542	0.474382	0.477888	0.571552	0.439605	0.586581	0.476954	0.499543	0.479186	0.637486	0.610393
	0.578809	0.587142	0.604165	0.505077	0.498089	0.469044	0.486571	0.559206	0.457145	0.58172	0.487616	0.47606	0.499016	0.633674	0.62482
	0.590453	0.597033	0.601202	0.511737	0.478683	0.476853	0.489106	0.577991	0.449151	0.596218	0.481374	0.521195	0.50931	0.644262	0.639478
	0.598093	0.569009	0.603424	0.500934	0.501617	0.471554	0.473627	0.575407	0.446844	0.590683	0.491429	0.524093	0.506585	0.648134	0.627407
	0.586741	0.548929	0.598893	0.47754	0.483191	0.469203	0.455129	0.556827	0.440878	0.577758	0.477629	0.52272	0.494172	0.611229	0.62459
	0.596856	0.58909	0.614795	0.522297	0.497305	0.476892	0.464189	0.568681	0.457622	0.601866	0.493251	0.55215	0.512489	0.666526	0.63396
	0.602678	0.601229	0.606256	0.514662	0.474762	0.478645	0.477672	0.569542	0.456787	0.588491	0.484951	0.570448	0.500757	0.645714	0.633155
	0.593072	0.562416	0.597412	0.514987	0.477801	0.49	0.472171	0.569214	0.451139	0.596583	0.472432	0.527447	0.505525	0.650917	0.608323
	0.603988	0.571707	0.616058	0.520916	0.517103	0.471195	0.480639	0.569255	0.451418	0.594841	0.485018	0.544068	0.475401	0.664045	0.619705
	0.604715	0.62146	0.622157	0.506701	0.477703	0.478765	0.476863	0.569542	0.452213	0.585654	0.487481	0.514029	0.51756	0.66102	0.661436
	0.590671	0.585044	0.607955	0.498741	0.476232	0.479363	0.467533	0.570977	0.445094	0.582788	0.491531	0.501982	0.495761	0.623873	0.612807
	0.595838	0.612318	0.599547	0.502234	0.482505	0.465299	0.476971	0.564702	0.460605	0.583574	0.478	0.534919	0.498865	0.649646	0.606656
	0.58907	0.601079	0.610395	0.509138	0.506812	0.470717	0.482634	0.573643	0.462475	0.591554	0.488426	0.523483	0.517484	0.651038	0.615796
	0.593509	0.623258	0.610569	0.516855	0.502303	0.481275	0.492288	0.572372	0.460406	0.595628	0.490012	0.550778	0.529973	0.662049	0.625568
	0.600204	0.577401	0.612747	0.502965	0.494658	0.48498	0.504476	0.572536	0.459452	0.582788	0.4863	0.532784	0.507872	0.65134	0.62666
	0.616577	0.572007	0.611876	0.520266	0.507008	0.480478	0.494391	0.56421	0.452651	0.593099	0.491261	0.546661	0.521496	0.645714	0.625683
	0.609445	0.627154	0.621678	0.525465	0.501617	0.491394	0.479182	0.570772	0.462196	0.583322	0.492374	0.567246	0.508931	0.654547	0.629591
	0.598239	0.601529	0.609044	0.522216	0.504165	0.482749	0.497681	0.574751	0.460884	0.594364	0.479788	0.583257	0.514608	0.650856	0.625338
	0.58907	0.592837	0.606474	0.490781	0.482505	0.471275	0.478158	0.571634	0.452969	0.594869	0.476144	0.506404	0.4972	0.642386	0.614474
	0.588561	0.604376	0.604513	0.508001	0.489464	0.475936	0.485115	0.57229	0.452253	0.584558	0.47557	0.546966	0.489782	0.624115	0.625338
	0.600568	0.611719	0.612529	0.522785	0.50789	0.483466	0.473088	0.566507	0.465617	0.587761	0.486267	0.566331	0.514532	0.650433	0.630741
	0.599258	0.646636	0.617104	0.513524	0.49407	0.468526	0.488836	0.570075	0.459333	0.588211	0.470036	0.529735	0.516349	0.669671	0.62528
	0.598676	0.625955	0.614795	0.505564	0.497991	0.491315	0.486247	0.558427	0.460247	0.595684	0.491733	0.562672	0.52581	0.649223	0.637236
	0.599549	0.615315	0.613793	0.501746	0.494658	0.470159	0.477025	0.569501	0.44748	0.588267	0.485592	0.550778	0.503784	0.641721	0.613899
	0.578009	0.565862	0.60948	0.488019	0.491522	0.475259	0.473627	0.561257	0.45635	0.582816	0.475165	0.508539	0.504617	0.623813	0.593608
	0.596347	0.576502	0.596759	0.49273	0.494462	0.476693	0.470769	0.567245	0.439924	0.573431	0.484715	0.511131	0.484559	0.631617	0.618842
	0.608063	0.643639	0.616015	0.528552	0.524748	0.485857	0.497573	0.553054	0.46335	0.588126	0.493521	0.582495	0.533606	0.637304	0.630224
	0.590162	0.588341	0.595582	0.506945	0.484759	0.469721	0.467749	0.5638	0.456031	0.57995	0.478607	0.547118	0.506888	0.625144	0.621027
	0.588706	0.552975	0.60325	0.514012	0.527492	0.486574	0.481663	0.552561	0.44406	0.584361	0.490383	0.538884	0.492507	0.626051	0.635569
	0.589652	0.591638	0.599503	0.516286	0.515633	0.464542	0.490508	0.562733	0.447799	0.587564	0.483601	0.531717	0.486376	0.635671	0.638616
	0.575608	0.594635	0.602117	0.50662	0.499853	0.477331	0.478967	0.563349	0.459492	0.590149	0.480733	0.543458	0.51264	0.635671	0.608208
	0.589652	0.582047	0.613444	0.49606	0.489366	0.481116	0.479182	0.553095	0.456946	0.584277	0.483196	0.520433	0.49667	0.64892	0.626315
	0.609809	0.592088	0.616842	0.499797	0.50789	0.482351	0.492396	0.563554	0.45981	0.579248	0.487819	0.562977	0.495988	0.653881	0.634995
	0.581648	0.54698	0.582426	0.490293	0.483681	0.484781	0.475299	0.562323	0.458696	0.579304	0.474389	0.532327	0.487209	0.640148	0.623441
	0.600277	0.574554	0.602596	0.522703	0.486524	0.47992	0.478967	0.558796	0.4686	0.574921	0.482116	0.560384	0.508174	0.637002	0.630396
	0.572842	0.586243	0.597369	0.515149	0.480349	0.479641	0.490454	0.566261	0.446526	0.586468	0.492678	0.524398	0.500151	0.640027	0.608381
	0.599112	0.548629	0.604731	0.495329	0.486328	0.471753	0.467425	0.547393	0.434276	0.574527	0.473579	0.509912	0.477369	0.625083	0.601426
	0.595255	0.564064	0.602074	0.491999	0.455748	0.473745	0.477511	0.558427	0.443583	0.592875	0.473917	0.512656	0.507342	0.65134	0.61091
	0.591471	0.586842	0.607476	0.507676	0.480055	0.475418	0.475299	0.556294	0.458139	0.579107	0.481509	0.508234	0.488495	0.635489	0.633213
	0.578373	0.541436	0.592751	0.485744	0.483093	0.475139	0.448118	0.549157	0.446128	0.571268	0.488494	0.517078	0.480548	0.626596	0.614876
	0.583831	0.590139	0.602466	0.512631	0.489366	0.475737	0.481933	0.568845	0.457742	0.579444	0.484951	0.567856	0.520739	0.646137	0.652929
	0.60719	0.539338	0.597325	0.487369	0.49211	0.486016	0.484629	0.557975	0.454958	0.578995	0.475402	0.492986	0.490539	0.629984	0.621716
	0.581284	0.545632	0.597804	0.492974	0.494658	0.469562	0.477618	0.562856	0.449509	0.58099	0.492037	0.514639	0.488041	0.647468	0.628557
	0.593145	0.580249	0.59885	0.500853	0.49113	0.485618	0.466724	0.562282	0.434753	0.580287	0.484782	0.505185	0.495837	0.645653	0.604185
	0.59984	0.594785	0.600331	0.498579	0.47339	0.482112	0.487542	0.576145	0.446963	0.583603	0.494163	0.582647	0.50439	0.613165	0.619705
	0.598239	0.626705	0.612965	0.516611	0.487504	0.47992	0.476486	0.554858	0.448634	0.577702	0.489101	0.531412	0.498032	0.642205	0.625453
	0.60719	0.572756	0.621504	0.489887	0.472606	0.480398	0.475893	0.556294	0.463151	0.578433	0.48431	0.534614	0.493945	0.629439	0.620394
	0.586086	0.575753	0.59458	0.498335	0.496815	0.472311	0.469259	0.567163	0.455912	0.584726	0.479586	0.50122	0.47858	0.624297	0.615106
	0.583903	0.569159	0.609088	0.502802	0.501911	0.474582	0.470715	0.568804	0.461043	0.578039	0.480665	0.539189	0.503103	0.630831	0.617923
	0.597948	0.614266	0.5958	0.497766	0.4877	0.481315	0.4856	0.558714	0.459094	0.577084	0.485187	0.552912	0.505525	0.65612	0.622004
	0.587469	0.571107	0.598109	0.493217	0.498873	0.481235	0.473843	0.560682	0.448157	0.573993	0.477899	0.536139	0.509991	0.642628	0.614704
	0.581211	0.601678	0.6151	0.494517	0.510144	0.48992	0.47503	0.552931	0.448276	0.576297	0.490282	0.565416	0.522328	0.640692	0.627062
	0.59511	0.585793	0.607911	0.51653	0.491424	0.466534	0.476054	0.575407	0.457225	0.581158	0.48296	0.524703	0.493188	0.631375	0.60953
	0.600422	0.543234	0.594798	0.503858	0.472606	0.472271	0.47805	0.564046	0.453844	0.572757	0.472331	0.537816	0.478353	0.608869	0.619992
	0.576408	0.590739	0.606517	0.504264	0.489562	0.484064	0.468019	0.562241	0.455316	0.571437	0.48765	0.507929	0.510369	0.643717	0.629476
	0.582594	0.549078	0.586172	0.49273	0.476232	0.473745	0.467911	0.542349	0.458577	0.57405	0.47196	0.557182	0.510596	0.599068	0.620682
	0.600277	0.581448	0.594145	0.506945	0.504852	0.48247	0.4856	0.553792	0.461958	0.569217	0.491834	0.518298	0.512943	0.637486	0.607059
	0.585868	0.606923	0.606387	0.495248	0.483387	0.483665	0.479128	0.55289	0.449946	0.578882	0.486942	0.486581	0.494475	0.6344	0.604012
	0.583103	0.618013	0.60068	0.534319	0.492796	0.482191	0.487002	0.570608	0.454202	0.578377	0.492037	0.512199	0.523388	0.654305	0.601196
	0.609082	0.575154	0.614838	0.504671	0.519161	0.494821	0.478427	0.564415	0.449389	0.584558	0.486368	0.568618	0.511883	0.651703	0.618268
	0.609445	0.564514	0.591967	0.488587	0.467804	0.476813	0.469744	0.552931	0.4441	0.569835	0.47196	0.519061	0.501741	0.627685	0.616026
	0.604206	0.561517	0.602684	0.482495	0.48819	0.495498	0.489969	0.553177	0.455037	0.578264	0.48377	0.561299	0.496518	0.623813	0.606139
	0.584922	0.573805	0.608913	0.519698	0.471626	0.486892	0.475353	0.552315	0.43714	0.581861	0.474119	0.522568	0.490463	0.623571	0.614474
	0.59038	0.532444	0.601725	0.495411	0.493384	0.482709	0.474706	0.551536	0.451338	0.567587	0.481138	0.513876	0.513018	0.620304	0.616543
	0.598676	0.58909	0.609611	0.502884	0.49113	0.476016	0.472818	0.552151	0.457185	0.566435	0.492847	0.515858	0.502271	0.625083	0.62505
	0.590889	0.565713	0.599721	0.491349	0.503675	0.488048	0.469583	0.55412	0.450304	0.573628	0.486773	0.562672	0.492885	0.623208	0.601311
	0.611774	0.613367	0.608783	0.530095	0.507694	0.484861	0.475353	0.557196	0.455753	0.57891	0.490518	0.585697	0.524447	0.646621	0.615738
	0.589652	0.604676	0.606605	0.505808	0.496325	0.479641	0.478643	0.554899	0.461043	0.578489	0.474187	0.540866	0.486679	0.637788	0.618382
	0.596784	0.601379	0.599198	0.491999	0.494756	0.479084	0.482904	0.549649	0.44581	0.584417	0.493758	0.510826	0.499167	0.633069	0.613554
	0.601877	0.607223	0.600767	0.49468	0.50593	0.488247	0.479398	0.568311	0.458855	0.565817	0.480497	0.537054	0.500227	0.614435	0.623441
	0.57699	0.57935	0.612268	0.497523	0.485641	0.485777	0.480854	0.552356	0.449986	0.571746	0.482049	0.543763	0.51983	0.619396	0.611197
	0.58827	0.603327	0.599765	0.498822	0.500245	0.471594	0.485654	0.55896	0.457344	0.571043	0.480564	0.534614	0.499319	0.639724	0.627177
	0.600713	0.548779	0.586042	0.48014	0.477017	0.466175	0.479991	0.532464	0.441196	0.569498	0.473613	0.500305	0.485619	0.623268	0.602345
	0.590089	0.595684	0.606169	0.505564	0.464961	0.484263	0.482418	0.558878	0.461202	0.585654	0.49008	0.568009	0.489706	0.614012	0.617693
	0.59038	0.583396	0.611397	0.534075	0.525336	0.481793	0.478967	0.567737	0.457384	0.574162	0.499156	0.589661	0.533454	0.647287	0.632408
	0.578955	0.562416	0.591182	0.488587	0.479271	0.473506	0.464459	0.55572	0.438492	0.567363	0.479214	0.513114	0.493415	0.609111	0.600851
	0.595765	0.569609	0.61131	0.511737	0.484269	0.471394	0.477079	0.551659	0.45281	0.571999	0.485794	0.546661	0.509234	0.624902	0.610105
	0.602969	0.632999	0.597064	0.531313	0.476036	0.472749	0.48862	0.554694	0.450463	0.576129	0.480902	0.558554	0.504012	0.636518	0.618497
	0.607626	0.54728	0.597064	0.49801	0.479075	0.466614	0.460522	0.554899	0.456946	0.568234	0.478236	0.518146	0.49069	0.620909	0.605794
	0.605225	0.571857	0.592228	0.498416	0.485347	0.477131	0.475731	0.545671	0.443662	0.567896	0.478573	0.535682	0.495459	0.620304	0.610105
	0.587978	0.604226	0.604557	0.519535	0.485347	0.480757	0.472926	0.556376	0.447719	0.574752	0.484242	0.560232	0.525961	0.618852	0.621314
	0.551448	0.496179	0.585867	0.471123	0.470744	0.462869	0.459767	0.546942	0.438174	0.557585	0.471724	0.486886	0.490539	0.597072	0.604644
	0.59984	0.575303	0.599503	0.491512	0.485445	0.468008	0.481717	0.548132	0.450185	0.576635	0.481239	0.548185	0.506812	0.630649	0.616083
	0.581575	0.597183	0.600113	0.514499	0.480251	0.468367	0.461169	0.549608	0.446049	0.558765	0.489675	0.529277	0.513246	0.642628	0.608553
	0.569058	0.585943	0.592489	0.495492	0.474566	0.472311	0.457933	0.544727	0.438412	0.561659	0.485389	0.50122	0.489328	0.620122	0.585331
	0.591108	0.618912	0.60142	0.495979	0.473194	0.472669	0.465484	0.549239	0.452253	0.571296	0.485153	0.524093	0.505601	0.613044	0.593493
	0.582157	0.570058	0.597935	0.514174	0.452122	0.459442	0.466778	0.545917	0.443424	0.566379	0.480564	0.513724	0.497351	0.630044	0.597057
	0.586669	0.555822	0.612878	0.495654	0.486818	0.482988	0.471686	0.543784	0.456867	0.562165	0.4863	0.517231	0.498713	0.632706	0.626602
	0.59642	0.546231	0.583036	0.491999	0.484857	0.470876	0.459713	0.546737	0.451816	0.573319	0.472061	0.536597	0.471617	0.613165	0.607059
	0.584995	0.554174	0.597325	0.482901	0.470352	0.483825	0.472225	0.541077	0.443304	0.570847	0.479349	0.540256	0.499924	0.628713	0.597977
	0.595037	0.587742	0.617409	0.521729	0.492698	0.480159	0.470553	0.54403	0.45802	0.576887	0.488696	0.567399	0.516424	0.630286	0.608496
	0.594892	0.586243	0.592881	0.520266	0.477409	0.469363	0.487218	0.563677	0.451338	0.570228	0.482083	0.530497	0.500908	0.637909	0.610163
	0.570805	0.53709	0.592838	0.500122	0.438204	0.468725	0.479937	0.540339	0.428708	0.562221	0.476313	0.528667	0.486754	0.59689	0.598264
	0.588342	0.563764	0.591749	0.469093	0.476232	0.467849	0.472926	0.551987	0.446247	0.563541	0.469193	0.49695	0.487057	0.593563	0.597459
	0.575753	0.559419	0.589788	0.48217	0.480251	0.469084	0.460954	0.555268	0.446526	0.564946	0.475604	0.531565	0.495837	0.619094	0.593091
	0.566657	0.51536	0.587959	0.461214	0.445457	0.461793	0.438302	0.52988	0.434952	0.557135	0.469125	0.456084	0.476915	0.602698	0.562798
	0.575753	0.5792	0.586869	0.494923	0.476429	0.473785	0.472009	0.54764	0.446765	0.561546	0.48657	0.540561	0.499773	0.6053	0.593781
	0.597439	0.538438	0.58456	0.474697	0.470254	0.464143	0.468342	0.53554	0.438571	0.555983	0.484445	0.494053	0.484257	0.604695	0.599931
	0.592708	0.566762	0.596889	0.491512	0.49309	0.47259	0.484306	0.555186	0.459929	0.565311	0.477932	0.550015	0.479186	0.614798	0.593263
	0.58827	0.545782	0.609044	0.477459	0.475252	0.467131	0.473843	0.53394	0.439407	0.573179	0.466662	0.505794	0.477066	0.61625	0.584699
	0.603624	0.56796	0.584038	0.505402	0.48966	0.48004	0.482742	0.545835	0.450026	0.56489	0.477257	0.537816	0.4972	0.61383	0.588205
	0.574516	0.523153	0.591052	0.469986	0.459081	0.461514	0.465592	0.53513	0.442032	0.55205	0.468552	0.494663	0.458068	0.599068	0.596425
	0.578009	0.554024	0.592576	0.489075	0.47339	0.460398	0.483281	0.546532	0.441316	0.561546	0.479417	0.509302	0.497124	0.61504	0.615221
	0.581648	0.565113	0.595757	0.489075	0.481035	0.473147	0.457286	0.553546	0.447282	0.562136	0.487684	0.484599	0.464502	0.602698	0.583032
	0.60064	0.561217	0.596192	0.490374	0.500245	0.480916	0.473196	0.536729	0.439645	0.569161	0.478911	0.519061	0.497048	0.622482	0.606082
	0.554577	0.522104	0.589222	0.489237	0.46947	0.459801	0.473574	0.528567	0.439407	0.555955	0.477966	0.500305	0.479034	0.577288	0.568661
	0.574298	0.55822	0.584648	0.508245	0.466529	0.471833	0.473735	0.538657	0.452253	0.56593	0.473579	0.499085	0.484938	0.609293	0.600218
	0.562509	0.541136	0.590137	0.46097	0.451142	0.464303	0.447848	0.538042	0.437219	0.556798	0.471521	0.502897	0.483273	0.606933	0.578663
	0.592126	0.59973	0.600026	0.483226	0.484367	0.465139	0.474329	0.537058	0.444895	0.565368	0.47476	0.524093	0.483424	0.608325	0.588895
	0.58645	0.628353	0.590442	0.513037	0.49358	0.476135	0.496656	0.561708	0.449986	0.56961	0.483534	0.515096	0.50984	0.60651	0.617923
	0.603988	0.598681	0.583253	0.50857	0.485445	0.467968	0.477564	0.550552	0.44931	0.56489	0.476448	0.54971	0.506812	0.629742	0.597114
	0.581939	0.596284	0.591618	0.516692	0.474174	0.475737	0.474059	0.551741	0.452571	0.562586	0.47088	0.562214	0.50439	0.616674	0.602978
	0.567094	0.586243	0.602509	0.476566	0.502107	0.481952	0.480153	0.545343	0.452213	0.57197	0.47719	0.50122	0.492204	0.602759	0.587113
	0.587833	0.554923	0.586172	0.492893	0.503185	0.475936	0.47174	0.530044	0.443066	0.55899	0.48377	0.540104	0.497578	0.622179	0.60223
	0.578737	0.584595	0.5914	0.511413	0.503381	0.476653	0.46872	0.549444	0.442429	0.568205	0.470846	0.53126	0.504617	0.615645	0.598896
	0.580774	0.553274	0.598066	0.46828	0.469862	0.471594	0.457124	0.540134	0.446924	0.553792	0.469699	0.531565	0.498713	0.595499	0.57303
	0.578955	0.590139	0.591313	0.491349	0.488092	0.478805	0.483227	0.539313	0.445532	0.563541	0.473917	0.52272	0.478731	0.620304	0.600793
	0.550502	0.527799	0.588525	0.468687	0.457218	0.46753	0.456801	0.540667	0.442827	0.558259	0.464469	0.494815	0.480245	0.612439	0.574812
	0.593436	0.545782	0.589875	0.495817	0.454768	0.470159	0.481825	0.531602	0.447122	0.568992	0.467539	0.510826	0.487511	0.610805	0.58878
	0.581284	0.575903	0.594406	0.483876	0.478487	0.486016	0.476	0.538493	0.447321	0.565002	0.477122	0.528362	0.484559	0.600399	0.598437
	0.572624	0.569759	0.595582	0.476566	0.478487	0.471275	0.464297	0.53878	0.443026	0.556939	0.478978	0.52394	0.47419	0.6174	0.58148
	0.594164	0.507568	0.582687	0.489075	0.482995	0.460558	0.472603	0.534597	0.441196	0.556714	0.481003	0.518298	0.508401	0.608567	0.590792
	0.594673	0.561517	0.603947	0.49671	0.463099	0.470598	0.480746	0.529183	0.446844	0.549465	0.474423	0.476365	0.506509	0.613407	0.600506
	0.606244	0.588341	0.595016	0.487531	0.500735	0.477331	0.488836	0.540011	0.446526	0.556264	0.473647	0.540256	0.493491	0.604453	0.600736
	0.597366	0.597932	0.591226	0.508407	0.499853	0.492271	0.474221	0.548952	0.439128	0.563569	0.483534	0.55764	0.507266	0.623268	0.600218
	0.604206	0.549528	0.597238	0.489968	0.49407	0.472789	0.480908	0.543661	0.441395	0.548847	0.484141	0.551998	0.496518	0.62345	0.578376
	0.596565	0.572756	0.589004	0.496223	0.480251	0.471793	0.481609	0.548501	0.459054	0.557894	0.482724	0.559622	0.500833	0.61256	0.587458
	0.556251	0.482092	0.567788	0.491674	0.47339	0.47239	0.455668	0.552602	0.436463	0.554635	0.479518	0.501525	0.47472	0.595741	0.571075
	0.570805	0.562865	0.583384	0.475347	0.484073	0.476375	0.470284	0.528895	0.433361	0.548678	0.478303	0.497408	0.477066	0.591627	0.589125
	0.565493	0.511314	0.584996	0.476972	0.445163	0.468127	0.447525	0.537058	0.431731	0.559271	0.475874	0.488716	0.487663	0.613709	0.566132
	0.588779	0.588191	0.592664	0.479409	0.46849	0.470996	0.462518	0.535417	0.439963	0.554831	0.4753	0.541324	0.489101	0.610684	0.59516
	0.576917	0.5792	0.575717	0.477215	0.463197	0.476135	0.448765	0.533079	0.440918	0.551741	0.472635	0.526228	0.478126	0.59931	0.577168
	0.591617	0.556871	0.597717	0.492405	0.482701	0.47243	0.468989	0.524507	0.446486	0.55722	0.473006	0.550473	0.476461	0.612015	0.602863
	0.583467	0.538738	0.593709	0.504021	0.465549	0.470438	0.473466	0.532423	0.4581	0.558343	0.487751	0.488869	0.471087	0.608748	0.584066
	0.590234	0.58999	0.595234	0.486069	0.484661	0.484263	0.48711	0.543128	0.446486	0.566969	0.480767	0.564806	0.490236	0.601428	0.582629
	0.608208	0.596284	0.596802	0.493055	0.503283	0.479203	0.480153	0.539067	0.441395	0.565901	0.483196	0.559774	0.501968	0.607296	0.617405
	0.556178	0.566911	0.601507	0.493786	0.472312	0.471355	0.459497	0.534515	0.427435	0.558456	0.481711	0.512351	0.475628	0.606873	0.578893
	0.557197	0.564514	0.593491	0.499066	0.473684	0.467809	0.470176	0.54202	0.436583	0.554241	0.474389	0.540409	0.51211	0.60657	0.582514
	0.60195	0.581148	0.601638	0.504427	0.497403	0.475976	0.474652	0.533571	0.446327	0.562727	0.477527	0.540561	0.487965	0.626959	0.612692
	0.581356	0.533193	0.59458	0.49468	0.473782	0.467131	0.460522	0.53677	0.439526	0.550926	0.479214	0.489936	0.485846	0.598705	0.58056
	0.598021	0.551176	0.605428	0.488019	0.474468	0.475657	0.470499	0.534022	0.439168	0.554073	0.466224	0.520433	0.467151	0.599552	0.58694
	0.588415	0.530946	0.578984	0.495817	0.472116	0.480319	0.465861	0.531069	0.434833	0.559692	0.470644	0.547728	0.478807	0.580918	0.588607
	0.607044	0.587292	0.60704	0.507757	0.515535	0.488167	0.470607	0.545712	0.450662	0.555421	0.487785	0.55642	0.511807	0.609293	0.598034
	0.592272	0.566762	0.594755	0.497847	0.479369	0.478924	0.478427	0.53714	0.4476	0.553145	0.478405	0.498323	0.470406	0.587936	0.59493
	0.571896	0.521505	0.598109	0.49606	0.482701	0.476255	0.449304	0.539765	0.444179	0.557023	0.466628	0.504575	0.471768	0.597072	0.570386
	0.584413	0.539637	0.586957	0.494517	0.453494	0.466773	0.454805	0.530249	0.44227	0.547245	0.46872	0.499848	0.472676	0.599915	0.577168
	0.560763	0.521505	0.587218	0.471936	0.459277	0.466813	0.448981	0.531315	0.448316	0.548734	0.461736	0.480634	0.468362	0.572993	0.562626
	0.586378	0.574105	0.598284	0.509869	0.485053	0.474183	0.475353	0.545671	0.439208	0.557135	0.480935	0.541171	0.504239	0.611773	0.572168
	0.58987	0.576502	0.591531	0.517911	0.489758	0.475857	0.468828	0.538206	0.448077	0.560479	0.485929	0.537511	0.505525	0.617763	0.590447
	0.563746	0.529447	0.596802	0.485907	0.470254	0.476614	0.468504	0.535745	0.441674	0.556629	0.474929	0.524855	0.497275	0.613467	0.598724
	0.607553	0.616514	0.597935	0.476484	0.483681	0.47	0.478481	0.547927	0.453128	0.558484	0.476448	0.554285	0.490085	0.604816	0.589125
	0.584777	0.553274	0.597543	0.485013	0.479467	0.466135	0.461007	0.535704	0.441037	0.551432	0.471926	0.510064	0.48789	0.601549	0.561476
	0.568258	0.519856	0.594798	0.454715	0.469666	0.461554	0.464567	0.533366	0.440282	0.546852	0.469058	0.532632	0.491901	0.604332	0.567971
	0.588488	0.582197	0.588917	0.474129	0.463491	0.473347	0.46667	0.543128	0.439645	0.555	0.476313	0.530192	0.491296	0.615403	0.598666
	0.599985	0.57875	0.594188	0.501503	0.489954	0.467928	0.480315	0.527829	0.4441	0.555534	0.487043	0.551693	0.489858	0.60415	0.589125
	0.554141	0.558669	0.576588	0.462432	0.467216	0.465139	0.463974	0.532464	0.432526	0.551572	0.473849	0.487191	0.473812	0.576925	0.559119
	0.592126	0.575453	0.599852	0.50199	0.489268	0.471355	0.47174	0.534022	0.461003	0.559383	0.473647	0.519366	0.486376	0.608143	0.57303
	0.585795	0.570208	0.592315	0.492486	0.478977	0.470637	0.45459	0.545466	0.447401	0.557023	0.476852	0.559774	0.487284	0.612378	0.567397
	0.583176	0.550127	0.612965	0.499228	0.462021	0.475219	0.461331	0.534392	0.446088	0.551909	0.484006	0.530345	0.497654	0.624962	0.581135
	0.571314	0.523752	0.593666	0.492324	0.481133	0.474661	0.474544	0.538247	0.446804	0.562811	0.468923	0.535529	0.482667	0.607115	0.564178
	0.592563	0.598981	0.603032	0.492405	0.488974	0.473426	0.471848	0.538493	0.44756	0.550757	0.472331	0.514639	0.490615	0.600218	0.573432
	0.603478	0.571107	0.598588	0.496467	0.469568	0.474542	0.466077	0.540626	0.447401	0.554944	0.476785	0.54788	0.501968	0.593805	0.607576
	0.587542	0.564064	0.584168	0.47616	0.467804	0.46255	0.472279	0.531069	0.443265	0.54983	0.469834	0.496035	0.472979	0.585032	0.597172
	0.583394	0.551926	0.595452	0.475997	0.478291	0.463347	0.465268	0.539642	0.445532	0.557641	0.47223	0.515401	0.484181	0.61383	0.616313
	0.581502	0.577102	0.588612	0.487531	0.473194	0.475976	0.481825	0.529757	0.453764	0.551769	0.468552	0.569686	0.50439	0.619517	0.581882
	0.581502	0.549378	0.601812	0.497847	0.474174	0.472709	0.474275	0.533038	0.438134	0.557107	0.476718	0.525923	0.494853	0.61141	0.591769
	0.563382	0.549228	0.591574	0.473479	0.453886	0.466295	0.4609	0.523686	0.433878	0.544323	0.466224	0.523788	0.487511	0.586847	0.578318
	0.592199	0.609771	0.589832	0.503127	0.47094	0.477849	0.474113	0.532013	0.450901	0.554719	0.480699	0.530345	0.493794	0.596588	0.583721
	0.578591	0.55822	0.582818	0.48014	0.445947	0.466853	0.461061	0.523974	0.433958	0.53182	0.462647	0.510064	0.469195	0.600339	0.561131
	0.57488	0.558819	0.576239	0.468687	0.466921	0.46996	0.463812	0.515688	0.434316	0.551741	0.470239	0.517841	0.483424	0.58237	0.577973
	0.604133	0.522104	0.58321	0.490862	0.484661	0.470598	0.459228	0.533448	0.437338	0.537383	0.476718	0.515706	0.494021	0.584367	0.593895
	0.573788	0.582347	0.585998	0.464381	0.472508	0.471434	0.474167	0.530126	0.432844	0.546374	0.474558	0.536749	0.49069	0.597193	0.568834
	0.576626	0.570058	0.589265	0.482008	0.466235	0.472749	0.459821	0.540544	0.435748	0.54126	0.473579	0.528515	0.490463	0.594773	0.570098
	0.588488	0.583995	0.601594	0.484932	0.469078	0.470757	0.467749	0.530454	0.437259	0.542581	0.475503	0.495425	0.491069	0.603303	0.57303
	0.579392	0.575603	0.581554	0.491106	0.469666	0.468526	0.465915	0.52787	0.436145	0.544829	0.465279	0.503812	0.480699	0.591748	0.569466
	0.577209	0.551176	0.588438	0.478596	0.484073	0.467052	0.473142	0.518108	0.446327	0.548144	0.48458	0.533394	0.47964	0.597556	0.576364
	0.566293	0.550727	0.582513	0.485257	0.454082	0.455378	0.468288	0.517657	0.435071	0.538142	0.478911	0.513876	0.491069	0.592837	0.588205
	0.568549	0.56796	0.578897	0.491024	0.462413	0.458606	0.461924	0.533038	0.442469	0.550195	0.479316	0.52943	0.508099	0.574445	0.559292
	0.556979	0.524652	0.580552	0.459589	0.468098	0.462749	0.457017	0.519872	0.43535	0.551797	0.483534	0.517993	0.477823	0.593684	0.577628
	0.583394	0.532144	0.578374	0.457802	0.468196	0.454382	0.461709	0.519913	0.437855	0.542469	0.458193	0.492376	0.47313	0.582975	0.566592
	0.584558	0.562715	0.587087	0.504833	0.474174	0.46757	0.472387	0.538411	0.453128	0.545531	0.472803	0.522415	0.491523	0.60409	0.603897
	0.574079	0.592088	0.58957	0.494923	0.49015	0.471554	0.466293	0.534145	0.449907	0.550982	0.479012	0.545898	0.496443	0.603485	0.582572
	0.556906	0.548029	0.575237	0.480952	0.450162	0.458446	0.472333	0.525942	0.434196	0.546486	0.470374	0.507777	0.480018	0.568334	0.574467
	0.562727	0.499625	0.567439	0.47153	0.449672	0.4649	0.449844	0.512202	0.424134	0.529741	0.460352	0.450442	0.485241	0.571299	0.555728
	0.570004	0.520905	0.581337	0.480708	0.480055	0.460239	0.467695	0.51052	0.440679	0.54525	0.470981	0.509149	0.478656	0.590659	0.560901
	0.584194	0.577252	0.588656	0.484445	0.496619	0.461912	0.469744	0.524138	0.440441	0.551797	0.472533	0.50366	0.483954	0.592897	0.573662
	0.581866	0.57935	0.584822	0.493624	0.449182	0.468446	0.468989	0.523892	0.442787	0.544716	0.469092	0.500762	0.482062	0.601186	0.573432
	0.565784	0.560168	0.576065	0.496467	0.47633	0.471713	0.478319	0.534802	0.444657	0.547526	0.468619	0.512351	0.485241	0.610382	0.567397
	0.575753	0.549678	0.582861	0.480627	0.467216	0.469402	0.460252	0.529962	0.434395	0.540642	0.476346	0.484142	0.481759	0.58715	0.553314
	0.601077	0.553125	0.59262	0.501665	0.470156	0.466693	0.474167	0.53353	0.441515	0.545531	0.471352	0.511131	0.494323	0.599129	0.554808
	0.562655	0.51536	0.573451	0.47754	0.472802	0.460996	0.460576	0.523399	0.440719	0.549071	0.471015	0.49817	0.486225	0.589267	0.555096
	0.575535	0.561816	0.583646	0.478921	0.456238	0.47761	0.477672	0.536442	0.438373	0.541289	0.471825	0.503202	0.481456	0.603727	0.571765
	0.569422	0.529147	0.579899	0.458533	0.429482	0.457092	0.452972	0.514622	0.422026	0.544688	0.466291	0.47179	0.467757	0.578014	0.584813
	0.573788	0.552375	0.582295	0.468362	0.445065	0.459004	0.460198	0.521554	0.431015	0.543087	0.471015	0.487954	0.489025	0.596285	0.558889
	0.594018	0.543983	0.596584	0.498091	0.466235	0.472191	0.464243	0.5323	0.442827	0.538423	0.4863	0.494053	0.510975	0.599976	0.578318
	0.586232	0.560617	0.578069	0.489643	0.46849	0.472869	0.456423	0.526435	0.445929	0.539827	0.483297	0.547728	0.5	0.583762	0.572627
	0.561854	0.545482	0.590572	0.478596	0.477703	0.459124	0.472279	0.52344	0.439566	0.538114	0.478405	0.511131	0.472979	0.607417	0.568546
	0.583321	0.585644	0.59384	0.486638	0.464275	0.476414	0.493097	0.525163	0.443225	0.53994	0.473276	0.527142	0.488041	0.597677	0.582974
	0.584267	0.54743	0.590442	0.48875	0.464569	0.471036	0.465915	0.514417	0.442469	0.53241	0.474997	0.506099	0.491901	0.594773	0.578031
	0.565056	0.555522	0.58138	0.451466	0.485641	0.464821	0.459713	0.511874	0.430577	0.548369	0.477561	0.490088	0.472298	0.604271	0.561476
	0.563964	0.576502	0.580988	0.478678	0.446731	0.46239	0.469852	0.528936	0.442867	0.547133	0.477629	0.530497	0.501287	0.598705	0.571938
	0.574079	0.526899	0.596149	0.470555	0.448202	0.471355	0.459551	0.519339	0.445213	0.541092	0.461398	0.523788	0.475855	0.581705	0.544347
	0.580774	0.558969	0.591269	0.482333	0.48721	0.481474	0.464621	0.527419	0.445492	0.546711	0.482488	0.537206	0.480699	0.605602	0.575099
	0.58645	0.530946	0.593578	0.465437	0.467216	0.472629	0.464675	0.513638	0.443901	0.543283	0.466628	0.50366	0.480926	0.574747	0.557108
	0.571969	0.518208	0.599155	0.479571	0.440557	0.461474	0.453888	0.504819	0.432327	0.534573	0.47827	0.491003	0.460566	0.574626	0.545381
	0.561854	0.554473	0.594711	0.457152	0.448398	0.468446	0.476324	0.51294	0.439685	0.537664	0.478607	0.523635	0.478807	0.604332	0.573605
	0.568403	0.541735	0.57515	0.471205	0.438204	0.467689	0.464028	0.511546	0.435151	0.538732	0.462681	0.464776	0.480472	0.578196	0.565845
	0.572915	0.518807	0.57454	0.481033	0.462119	0.458167	0.45885	0.521636	0.43185	0.53713	0.466358	0.491003	0.457463	0.572751	0.561764
	0.575098	0.508767	0.570968	0.463813	0.455748	0.456972	0.462733	0.510972	0.425963	0.540389	0.463457	0.450747	0.468968	0.580858	0.554004
	0.575244	0.570508	0.582513	0.483064	0.482701	0.46506	0.473951	0.51577	0.4546	0.546739	0.473208	0.530345	0.490085	0.59447	0.578433
	0.571605	0.540237	0.578461	0.47616	0.475644	0.459243	0.454104	0.510233	0.440719	0.545391	0.471386	0.508844	0.48683	0.605905	0.552164
2	0.587687	0.571257	0.599373	0.495573	0.455748	0.469243	0.470553	0.525163	0.438651	0.546009	0.47881	0.501067	0.489404	0.605784	0.552049
	0.571533	0.544133	0.588046	0.476647	0.458493	0.459283	0.449682	0.519708	0.431969	0.535894	0.478033	0.523483	0.466773	0.580253	0.561591
	0.574225	0.522554	0.59018	0.472179	0.457807	0.466255	0.446985	0.511956	0.43189	0.537552	0.471217	0.506099	0.490539	0.603606	0.582169
	0.573133	0.551176	0.592228	0.487369	0.467804	0.457291	0.467479	0.536565	0.442986	0.544126	0.47611	0.509607	0.498108	0.601609	0.583606
	0.555742	0.53634	0.593056	0.470392	0.468588	0.461713	0.457124	0.506296	0.437736	0.536091	0.470678	0.480024	0.477672	0.596104	0.563143
	0.588342	0.587742	0.591923	0.490293	0.484367	0.481514	0.48587	0.538575	0.453605	0.547526	0.469328	0.54788	0.514078	0.618126	0.559867
	0.587615	0.545632	0.591662	0.474129	0.465353	0.458406	0.483497	0.52139	0.430935	0.540811	0.465987	0.536139	0.488193	0.583701	0.56389
	0.565929	0.548929	0.586303	0.467387	0.441243	0.45757	0.477187	0.512653	0.429583	0.537411	0.469901	0.484904	0.499773	0.58842	0.552164
	0.58696	0.531395	0.576065	0.459427	0.445947	0.45243	0.459228	0.512817	0.423259	0.538479	0.466763	0.464623	0.483954	0.567729	0.546359
	0.579028	0.539637	0.582513	0.49143	0.460649	0.472191	0.455668	0.532341	0.4441	0.539799	0.476616	0.486886	0.480472	0.58721	0.556303
	0.573206	0.551626	0.59005	0.473641	0.465745	0.46239	0.467587	0.508716	0.431611	0.535529	0.459374	0.47423	0.47313	0.588965	0.546876
	0.568549	0.56841	0.59079	0.493136	0.464863	0.454661	0.470877	0.517575	0.437855	0.548509	0.470104	0.55093	0.498108	0.591203	0.554636
	0.575025	0.57875	0.59567	0.482739	0.498579	0.463506	0.459659	0.521964	0.440878	0.548228	0.469294	0.535834	0.494626	0.580616	0.566994
	0.564547	0.552076	0.591269	0.462676	0.459767	0.475299	0.477403	0.511915	0.441077	0.545222	0.468147	0.516163	0.502952	0.5932	0.570386
	0.579828	0.50547	0.590267	0.4868	0.479369	0.471155	0.472387	0.511587	0.441117	0.544604	0.47449	0.521958	0.493642	0.584246	0.565615
	0.585941	0.539188	0.582251	0.492486	0.465157	0.478486	0.4808	0.53271	0.44048	0.539153	0.464131	0.540104	0.483424	0.597798	0.58102
	0.577863	0.571257	0.579812	0.471042	0.464765	0.466215	0.458203	0.524056	0.435748	0.536596	0.468012	0.490088	0.494248	0.597737	0.571823
	0.559962	0.55807	0.589004	0.471042	0.460845	0.467968	0.47654	0.512284	0.422702	0.531623	0.472938	0.514181	0.48736	0.597919	0.554233
	0.578373	0.552975	0.57441	0.471936	0.427129	0.470319	0.451839	0.517165	0.430179	0.533	0.468012	0.541019	0.467832	0.591869	0.553199
	0.582011	0.525551	0.591444	0.494355	0.447809	0.459004	0.459605	0.508224	0.444577	0.546824	0.473478	0.529125	0.483121	0.574324	0.561649
	0.54992	0.540986	0.569356	0.470149	0.447221	0.470518	0.463057	0.51614	0.440321	0.536765	0.468282	0.523178	0.478883	0.602396	0.574122
	0.550575	0.500525	0.569487	0.472504	0.439479	0.451833	0.454859	0.503466	0.425566	0.526706	0.464604	0.488106	0.455117	0.58237	0.546474
	0.571969	0.540237	0.574932	0.474616	0.463099	0.464462	0.450922	0.517616	0.43523	0.532241	0.474828	0.497408	0.466167	0.587634	0.552049
	0.57146	0.552825	0.598284	0.472829	0.45124	0.456853	0.445098	0.511177	0.432208	0.530527	0.462377	0.499085	0.492734	0.576199	0.538196
	0.584486	0.56811	0.582251	0.47754	0.466039	0.459482	0.473843	0.526188	0.441952	0.536203	0.479518	0.5276	0.482289	0.588299	0.556418
	0.575535	0.532144	0.594319	0.472504	0.45516	0.470239	0.459228	0.506009	0.432924	0.529713	0.468282	0.494358	0.475098	0.578256	0.567569
	0.591253	0.571557	0.590267	0.486151	0.47535	0.453705	0.476702	0.514253	0.429821	0.544126	0.47277	0.563891	0.489933	0.579648	0.57142
	0.566948	0.549678	0.589527	0.493949	0.459473	0.460797	0.469906	0.517575	0.439526	0.535332	0.479113	0.509759	0.481229	0.592232	0.571823
	0.569859	0.525701	0.566699	0.466981	0.454768	0.462749	0.467911	0.506378	0.421469	0.536091	0.462714	0.534004	0.468438	0.572267	0.566132
	0.57015	0.549828	0.58957	0.479327	0.457414	0.466335	0.465106	0.511341	0.442071	0.545025	0.463996	0.515554	0.479034	0.587876	0.562683
	0.544026	0.524352	0.575281	0.446105	0.451926	0.450717	0.459875	0.510685	0.436782	0.534349	0.464773	0.49512	0.458674	0.568697	0.55044
	0.582521	0.575154	0.586042	0.451547	0.486328	0.467052	0.47023	0.509987	0.434395	0.530527	0.466426	0.546966	0.49122	0.577107	0.560556
	0.588342	0.53724	0.582818	0.49143	0.475056	0.470159	0.467317	0.517903	0.426719	0.540867	0.474895	0.507777	0.492658	0.60772	0.55751
	0.583831	0.527349	0.584125	0.476647	0.465549	0.464661	0.460091	0.50244	0.436225	0.542946	0.473377	0.531869	0.47086	0.576744	0.557395
	0.570223	0.578151	0.585127	0.469905	0.45614	0.47757	0.468396	0.499159	0.433441	0.534264	0.469935	0.505947	0.469649	0.578982	0.569983
	0.555305	0.548779	0.575368	0.477378	0.464961	0.468446	0.454212	0.519954	0.436304	0.533253	0.478	0.503965	0.478429	0.612015	0.553486
	0.569932	0.54788	0.587218	0.481683	0.454964	0.466733	0.456693	0.507157	0.430577	0.532944	0.465852	0.500915	0.481381	0.57632	0.541703
	0.583103	0.588041	0.576719	0.484282	0.485837	0.476892	0.473304	0.509249	0.442509	0.539266	0.479822	0.526532	0.503028	0.590235	0.562626
	0.583103	0.581448	0.583646	0.496954	0.472606	0.456454	0.468396	0.514909	0.449867	0.547835	0.465616	0.528972	0.50492	0.587694	0.568776
	0.560472	0.549978	0.563867	0.455528	0.472312	0.466016	0.464459	0.509085	0.43185	0.53522	0.468214	0.516011	0.447396	0.583762	0.553946
	0.589579	0.550877	0.590093	0.482983	0.468686	0.466215	0.470931	0.512817	0.438929	0.540895	0.465211	0.528362	0.492885	0.61135	0.583836
	0.5783	0.558519	0.57894	0.479165	0.466823	0.474622	0.480962	0.517411	0.443185	0.533702	0.473849	0.521653	0.486225	0.617944	0.567914
	0.574807	0.554024	0.582121	0.476078	0.475546	0.472669	0.471632	0.511997	0.437498	0.540052	0.474828	0.540866	0.485241	0.564402	0.561878
	0.569058	0.559419	0.564651	0.465925	0.455356	0.4549	0.458149	0.509085	0.424054	0.53536	0.473546	0.49573	0.485998	0.579769	0.570041
	0.541042	0.518957	0.574235	0.501421	0.448202	0.459044	0.465376	0.501374	0.436821	0.525273	0.467708	0.469655	0.493037	0.573416	0.550957
	0.595401	0.559419	0.580378	0.451872	0.47045	0.465498	0.453942	0.502071	0.446247	0.53994	0.462242	0.497408	0.48683	0.593381	0.553026
	0.586232	0.492432	0.586129	0.473235	0.459669	0.468645	0.464351	0.513679	0.435907	0.540193	0.468214	0.485361	0.482213	0.59689	0.548313
	0.568549	0.532144	0.577851	0.478759	0.450554	0.469801	0.443534	0.505106	0.432605	0.527071	0.45745	0.499085	0.470936	0.592897	0.53354
	0.553777	0.551326	0.571752	0.484688	0.461041	0.473785	0.445152	0.50769	0.434037	0.536568	0.46538	0.492528	0.503406	0.585153	0.547278
	0.592781	0.576952	0.587654	0.484932	0.454376	0.470996	0.476917	0.505394	0.448872	0.545756	0.475975	0.519213	0.479942	0.600702	0.543657
	0.581939	0.53724	0.577938	0.466981	0.46947	0.450637	0.467156	0.49961	0.443304	0.529628	0.469024	0.548948	0.492355	0.589812	0.569926
	0.578591	0.560018	0.562691	0.472179	0.471234	0.450956	0.444504	0.508306	0.439605	0.539069	0.467	0.511436	0.478959	0.58479	0.55751
	0.561563	0.497977	0.560687	0.461863	0.424189	0.45239	0.453026	0.479267	0.419799	0.528785	0.453975	0.446783	0.442325	0.545405	0.524458
	0.57568	0.54728	0.579681	0.487044	0.48623	0.465697	0.478859	0.508593	0.440321	0.543199	0.463052	0.515858	0.481986	0.610866	0.548945
	0.556833	0.529447	0.580335	0.482252	0.452416	0.462351	0.448226	0.518478	0.43006	0.530162	0.458631	0.499543	0.467075	0.580616	0.55044
	0.561054	0.575154	0.585824	0.484607	0.4483	0.463307	0.462302	0.508101	0.439963	0.53404	0.463524	0.500457	0.477596	0.573779	0.568489
	0.5775	0.504421	0.571186	0.454715	0.460551	0.466016	0.466886	0.496739	0.431492	0.534742	0.470239	0.480787	0.475931	0.583883	0.548543
	0.56622	0.541436	0.570794	0.467631	0.461237	0.461076	0.462086	0.495796	0.436702	0.534068	0.478776	0.484294	0.484787	0.577651	0.523251
	0.576044	0.548329	0.590572	0.490374	0.460943	0.474582	0.467749	0.510192	0.440162	0.527128	0.473242	0.508234	0.483121	0.603122	0.556015
	0.569713	0.546531	0.589919	0.480302	0.446731	0.463825	0.460414	0.510069	0.452293	0.53536	0.466493	0.492833	0.47858	0.576744	0.550555
	0.574807	0.532894	0.580509	0.469174	0.466529	0.454183	0.468126	0.510233	0.431611	0.531146	0.460386	0.512961	0.491371	0.586484	0.555383
	0.568622	0.504571	0.559946	0.462432	0.432716	0.458645	0.442131	0.510562	0.432486	0.532607	0.464266	0.492528	0.471541	0.581947	0.552394
	0.5628	0.545931	0.568833	0.463569	0.467216	0.464024	0.466131	0.5218	0.447282	0.532691	0.478	0.529125	0.454662	0.575836	0.562396
	0.568695	0.571107	0.583776	0.480952	0.482505	0.465817	0.463111	0.515073	0.445054	0.532522	0.468788	0.534309	0.484257	0.595196	0.559004
	0.573643	0.550877	0.573713	0.473479	0.468882	0.455259	0.456477	0.519667	0.431651	0.532241	0.465414	0.494663	0.48403	0.569363	0.550267
	0.561927	0.521954	0.572406	0.461945	0.425757	0.450757	0.449466	0.487511	0.415941	0.519541	0.456269	0.465996	0.458977	0.572811	0.55613
	0.576263	0.535291	0.573756	0.493949	0.461825	0.455657	0.460684	0.51614	0.433043	0.524599	0.465009	0.514791	0.468438	0.591808	0.546588
	0.5628	0.535741	0.56391	0.461214	0.458983	0.455498	0.445799	0.511628	0.433679	0.535641	0.460082	0.47057	0.467	0.598342	0.551532
	0.582666	0.584145	0.569792	0.47819	0.460355	0.46247	0.468396	0.514089	0.451418	0.536091	0.468957	0.55154	0.494021	0.586061	0.567684
	0.554141	0.497827	0.561122	0.456177	0.446633	0.451155	0.462032	0.502892	0.431691	0.533871	0.469058	0.494358	0.499016	0.573719	0.545209
	0.577427	0.511764	0.575237	0.466412	0.472998	0.451992	0.455291	0.510931	0.437855	0.533365	0.471386	0.501067	0.468892	0.570149	0.536644
	0.549993	0.527499	0.564956	0.478028	0.456924	0.45992	0.450221	0.500431	0.429662	0.526369	0.465684	0.465843	0.466546	0.588783	0.539001
	0.561781	0.528997	0.572319	0.452603	0.443105	0.461873	0.465538	0.510685	0.431333	0.535191	0.47088	0.5491	0.476158	0.588662	0.55797
	0.567312	0.532894	0.570707	0.452197	0.427129	0.460438	0.446176	0.505188	0.432049	0.5296	0.465886	0.500915	0.471011	0.566882	0.550152
	0.571533	0.585943	0.590747	0.493705	0.47584	0.463466	0.473843	0.521185	0.437418	0.538226	0.473309	0.510522	0.508629	0.59804	0.559062
	0.559744	0.528997	0.580117	0.458533	0.436538	0.472271	0.466616	0.506132	0.424611	0.531033	0.471656	0.50366	0.471314	0.568758	0.556533
	0.584486	0.538588	0.585083	0.46828	0.474468	0.466295	0.459443	0.509208	0.434435	0.534096	0.466898	0.527295	0.478656	0.590538	0.567569
	0.573861	0.544583	0.585955	0.49208	0.445359	0.461952	0.453942	0.50806	0.444537	0.533787	0.465886	0.508844	0.478731	0.584367	0.564235
	0.569422	0.586693	0.584343	0.474129	0.473194	0.466414	0.469529	0.51372	0.441674	0.535023	0.472398	0.560994	0.481683	0.580979	0.557567
	0.600131	0.543234	0.589919	0.49606	0.499657	0.462669	0.471578	0.510438	0.436821	0.537355	0.475435	0.548795	0.501287	0.597495	0.554004
	0.582957	0.530796	0.58456	0.467793	0.465353	0.4549	0.458581	0.498995	0.442151	0.53255	0.462782	0.52333	0.47578	0.584609	0.560384
	0.564474	0.540087	0.58138	0.479409	0.449672	0.468486	0.459605	0.505476	0.426123	0.528027	0.471859	0.503202	0.465183	0.580434	0.556763
	0.579828	0.506069	0.569182	0.465194	0.454082	0.452749	0.433233	0.48829	0.420157	0.523784	0.456978	0.50488	0.471465	0.587634	0.5582
	0.559817	0.545931	0.573146	0.473317	0.442419	0.464303	0.440945	0.495099	0.434475	0.523194	0.463794	0.498933	0.480321	0.578014	0.561131
	0.5783	0.537689	0.583036	0.484201	0.442223	0.4649	0.459336	0.508511	0.429225	0.533759	0.472297	0.501677	0.482516	0.56906	0.530724
	0.556469	0.52675	0.570402	0.453416	0.445849	0.456215	0.446716	0.499733	0.437458	0.519148	0.465211	0.519823	0.480018	0.563857	0.541818
	0.561709	0.551776	0.568659	0.45634	0.466627	0.464861	0.467264	0.496862	0.425804	0.531876	0.464806	0.489936	0.467757	0.569786	0.568661
	0.569422	0.590289	0.578026	0.480952	0.489072	0.472908	0.464998	0.50281	0.441594	0.530949	0.471589	0.563129	0.497654	0.582068	0.563545
	0.57015	0.531845	0.597717	0.48875	0.458787	0.464781	0.46392	0.4992	0.436265	0.533112	0.476481	0.540714	0.469043	0.557686	0.542335
	0.573643	0.539787	0.592969	0.469905	0.461041	0.46753	0.459282	0.50564	0.435032	0.520244	0.464064	0.543763	0.495837	0.59326	0.555498
	0.544753	0.482691	0.560861	0.441231	0.446927	0.445817	0.451084	0.49071	0.429583	0.520722	0.44807	0.472248	0.433848	0.558896	0.521182
	0.556324	0.539188	0.572144	0.469418	0.464863	0.467849	0.457448	0.50486	0.434435	0.525498	0.463862	0.502592	0.469724	0.581402	0.533598
	0.58696	0.518957	0.571447	0.465762	0.474958	0.466056	0.462086	0.509864	0.43177	0.530106	0.470813	0.505337	0.503633	0.581523	0.549175
	0.569058	0.537689	0.570227	0.480627	0.476821	0.469562	0.472495	0.505886	0.438134	0.534545	0.468855	0.548338	0.466773	0.565188	0.571995
	0.545554	0.525251	0.56892	0.46097	0.43497	0.46247	0.44979	0.494976	0.43698	0.514512	0.457315	0.494053	0.470103	0.560469	0.532678
	0.572551	0.535741	0.583297	0.504996	0.461433	0.473068	0.494661	0.502153	0.44227	0.53713	0.462276	0.550778	0.514759	0.587694	0.548715
	0.579901	0.541436	0.577634	0.478028	0.467608	0.466494	0.456046	0.494647	0.436304	0.527942	0.470171	0.512199	0.493264	0.571601	0.55728
	0.576408	0.527349	0.572841	0.482901	0.454866	0.457928	0.457502	0.493581	0.436702	0.531679	0.46015	0.47667	0.472374	0.564039	0.536472
	0.591908	0.548179	0.596977	0.479003	0.448103	0.460677	0.474167	0.511095	0.448236	0.542441	0.47277	0.537664	0.497351	0.585093	0.563775
	0.558434	0.533193	0.578026	0.479003	0.45222	0.452271	0.460252	0.492474	0.428231	0.529713	0.466224	0.478957	0.476461	0.566277	0.540725
	0.561054	0.485239	0.569225	0.453822	0.420857	0.4549	0.437709	0.47656	0.43185	0.531258	0.459947	0.467978	0.46594	0.564644	0.54837
	0.563601	0.542934	0.560643	0.464463	0.439087	0.457928	0.449196	0.479554	0.427515	0.519429	0.466865	0.486734	0.46314	0.572509	0.536357
	0.566584	0.514162	0.569008	0.444237	0.452416	0.458805	0.454428	0.493786	0.431412	0.527212	0.449318	0.503812	0.473282	0.556295	0.551302
	0.554286	0.488536	0.564651	0.430347	0.435068	0.455498	0.445853	0.492556	0.427952	0.533702	0.469699	0.475907	0.45769	0.533487	0.522159
	0.567676	0.487936	0.570837	0.46032	0.438695	0.458924	0.455614	0.482753	0.431611	0.530668	0.471859	0.484599	0.473282	0.564341	0.547968
	0.556105	0.55807	0.575063	0.493217	0.436146	0.451912	0.468666	0.499241	0.440838	0.532438	0.463153	0.512199	0.485998	0.582794	0.555498
	0.565493	0.52615	0.572885	0.452685	0.457807	0.448367	0.464243	0.481071	0.436543	0.527381	0.449015	0.529277	0.456328	0.573477	0.544634
	0.583903	0.538738	0.579681	0.491268	0.479565	0.461394	0.467857	0.493212	0.434873	0.525976	0.466426	0.542696	0.488495	0.55206	0.560212
	0.571096	0.53679	0.57197	0.465762	0.458493	0.465498	0.463327	0.499733	0.437696	0.533787	0.465616	0.543916	0.488344	0.557444	0.562166
	0.574079	0.558819	0.568136	0.482739	0.458591	0.469761	0.460145	0.502153	0.439367	0.522239	0.463457	0.494206	0.464275	0.57263	0.539978
	0.551448	0.531845	0.566829	0.462757	0.439969	0.459044	0.458634	0.506419	0.441196	0.516676	0.463929	0.497103	0.473812	0.577349	0.531471
	0.56673	0.537539	0.579899	0.497685	0.452612	0.46761	0.471578	0.502728	0.443941	0.529488	0.472162	0.512809	0.494702	0.569968	0.556245
	0.558652	0.483441	0.587087	0.473073	0.455062	0.473944	0.456585	0.495304	0.444935	0.535388	0.463659	0.507777	0.468513	0.574808	0.527275
	0.573061	0.53649	0.572624	0.487369	0.482211	0.469323	0.471956	0.505188	0.440958	0.533646	0.468855	0.530192	0.50333	0.591748	0.568489
	0.562655	0.516559	0.569051	0.467224	0.462217	0.459243	0.459875	0.496288	0.427196	0.525217	0.463659	0.499085	0.462383	0.555932	0.546014
	0.557706	0.519706	0.562734	0.459995	0.431932	0.450558	0.453565	0.496247	0.429702	0.524515	0.461128	0.512046	0.466318	0.55938	0.530264
	0.553558	0.507868	0.564259	0.455934	0.437714	0.45996	0.457987	0.487388	0.434793	0.529741	0.459509	0.498323	0.475174	0.551879	0.536357
	0.568767	0.489435	0.586739	0.489968	0.458885	0.467371	0.460846	0.498421	0.443782	0.536877	0.459981	0.492528	0.487209	0.555025	0.544059
	0.569859	0.511464	0.564695	0.486476	0.467608	0.454422	0.450221	0.484394	0.430617	0.52606	0.451883	0.478805	0.483651	0.56295	0.514399
	0.557415	0.543534	0.581903	0.482658	0.451926	0.463108	0.461007	0.493212	0.441276	0.52311	0.466426	0.542086	0.469573	0.580192	0.532506
	0.590016	0.541286	0.571491	0.448948	0.4384	0.4649	0.447632	0.490013	0.429901	0.531483	0.466358	0.495425	0.488874	0.561861	0.524516
	0.579101	0.554174	0.573887	0.484932	0.446633	0.466813	0.472818	0.492063	0.454918	0.524571	0.467472	0.52394	0.502498	0.590538	0.536587
	0.579246	0.526	0.570358	0.493299	0.454866	0.461554	0.460145	0.496862	0.430378	0.527212	0.466797	0.481549	0.482743	0.575292	0.529919
	0.558507	0.519706	0.565914	0.462026	0.437714	0.46239	0.459336	0.479021	0.428191	0.518783	0.468855	0.519213	0.473055	0.568697	0.527735
	0.563601	0.514012	0.565087	0.491674	0.465059	0.473506	0.468774	0.489972	0.436503	0.52828	0.465717	0.516621	0.481683	0.562526	0.556648
	0.558652	0.514012	0.567613	0.486069	0.484955	0.465498	0.452918	0.483368	0.440838	0.521902	0.46565	0.532784	0.492204	0.553028	0.542277
	0.566148	0.489735	0.568049	0.458371	0.444967	0.448327	0.459389	0.487224	0.435867	0.514287	0.452659	0.47667	0.4698	0.553633	0.522906
	0.554504	0.520905	0.561732	0.457396	0.457611	0.453984	0.435012	0.484106	0.41435	0.513641	0.45357	0.49573	0.477445	0.552	0.539288
	0.573425	0.553874	0.574061	0.485338	0.459081	0.461554	0.455345	0.486485	0.441435	0.530415	0.457079	0.527752	0.470633	0.574808	0.553314
	0.568331	0.499326	0.554457	0.474129	0.446045	0.459761	0.451246	0.478323	0.417094	0.520019	0.45249	0.49634	0.483803	0.566277	0.52693
	0.58645	0.528698	0.58761	0.483876	0.452122	0.452789	0.46996	0.491161	0.438452	0.528252	0.468181	0.501677	0.481986	0.560893	0.547796
	0.582375	0.566312	0.579463	0.479165	0.463393	0.477171	0.476755	0.488987	0.441753	0.52679	0.461533	0.52455	0.501741	0.565188	0.544289
	0.551739	0.499475	0.572624	0.470555	0.437518	0.458167	0.461385	0.495919	0.423339	0.526116	0.465245	0.507624	0.480094	0.54964	0.538484
	0.564328	0.552675	0.573277	0.480058	0.471822	0.469203	0.466401	0.48911	0.447361	0.52547	0.472432	0.508082	0.473812	0.57148	0.534402
	0.564765	0.563165	0.574235	0.477459	0.450064	0.455299	0.464028	0.490956	0.433321	0.528167	0.467809	0.523025	0.489782	0.569423	0.553486
	0.557706	0.492132	0.567396	0.463488	0.446927	0.444143	0.436361	0.492556	0.432844	0.517266	0.455055	0.468131	0.480094	0.564825	0.511755
	0.570223	0.546531	0.573495	0.446592	0.441439	0.456614	0.450167	0.476355	0.435668	0.516985	0.456944	0.506404	0.472147	0.544074	0.531069
	0.560253	0.528398	0.570532	0.47421	0.449868	0.442151	0.468612	0.488987	0.436066	0.513922	0.463963	0.501372	0.464048	0.578014	0.52762
	0.582011	0.545782	0.575368	0.470067	0.46996	0.463108	0.469043	0.489603	0.432725	0.528308	0.467506	0.506252	0.479337	0.581826	0.547911
	0.564328	0.538139	0.564172	0.456502	0.454278	0.459522	0.461007	0.493704	0.431691	0.519148	0.458058	0.534767	0.469573	0.565612	0.531356
	0.563964	0.506219	0.56757	0.458371	0.456336	0.448725	0.453511	0.481071	0.412003	0.521845	0.467843	0.502592	0.465637	0.555327	0.523539
	0.544826	0.523453	0.571404	0.461538	0.455748	0.455578	0.44143	0.476642	0.433679	0.516338	0.460082	0.509454	0.46753	0.548672	0.536874
	0.54992	0.513412	0.576632	0.452766	0.428893	0.450359	0.451623	0.48747	0.432804	0.512798	0.465717	0.490088	0.471995	0.560106	0.529459
	0.581138	0.549378	0.576501	0.478515	0.436048	0.451594	0.450976	0.482343	0.430537	0.527015	0.463423	0.477585	0.469422	0.562103	0.527045
	0.56069	0.51536	0.570881	0.462757	0.448692	0.449402	0.482418	0.485624	0.428668	0.519092	0.462782	0.437786	0.458295	0.549943	0.511238
	0.565565	0.519856	0.572362	0.461376	0.456728	0.465458	0.466347	0.483491	0.427952	0.521874	0.461196	0.505489	0.464426	0.561437	0.531241
	0.565784	0.519407	0.575455	0.46227	0.4483	0.462629	0.453942	0.48464	0.431532	0.51957	0.459273	0.515096	0.477823	0.561921	0.537851
	0.562218	0.522404	0.569051	0.46893	0.444477	0.463944	0.46338	0.475411	0.435668	0.517238	0.460015	0.44724	0.471995	0.559078	0.520492
	0.565565	0.554923	0.570315	0.457558	0.475742	0.465538	0.459659	0.484927	0.436066	0.524037	0.473748	0.504575	0.482592	0.566761	0.53377
	0.560472	0.524352	0.567788	0.499797	0.477213	0.46494	0.467803	0.489972	0.434634	0.530359	0.473883	0.513114	0.475401	0.57626	0.546531
	0.550065	0.559419	0.567962	0.475997	0.45712	0.465578	0.461547	0.497888	0.439407	0.532803	0.460319	0.514486	0.462458	0.567245	0.546474
	0.568331	0.525251	0.576022	0.448948	0.459963	0.466016	0.459282	0.487347	0.433162	0.519345	0.470171	0.526532	0.46314	0.539597	0.539518
	0.574589	0.559419	0.578766	0.463732	0.459767	0.462869	0.446392	0.485624	0.436265	0.524121	0.460622	0.54971	0.490085	0.564281	0.546301
	0.570878	0.479095	0.579158	0.476647	0.459963	0.450876	0.454428	0.48747	0.434912	0.520974	0.455291	0.518908	0.46208	0.561074	0.533598
	0.558216	0.498277	0.570794	0.466087	0.430266	0.459363	0.446608	0.475124	0.420912	0.51971	0.457552	0.450595	0.458825	0.529675	0.535954
	0.565274	0.503072	0.57637	0.469174	0.461531	0.452311	0.455129	0.478077	0.427992	0.526987	0.462276	0.491156	0.474417	0.554178	0.530034
	0.54257	0.499475	0.567701	0.473723	0.436538	0.454064	0.445745	0.48628	0.432844	0.526313	0.450162	0.49695	0.473282	0.551213	0.521814
	0.552904	0.477596	0.577111	0.434489	0.458101	0.443785	0.441538	0.479759	0.429503	0.515495	0.447665	0.514029	0.454587	0.557142	0.545496
	0.550284	0.518208	0.568703	0.457721	0.447711	0.45259	0.449574	0.482343	0.446526	0.516226	0.464908	0.521195	0.483954	0.557686	0.545726
	0.542134	0.514012	0.569661	0.462757	0.45369	0.453386	0.4561	0.479226	0.439248	0.517294	0.454009	0.481397	0.47911	0.560227	0.510778
	0.556906	0.539937	0.565871	0.479815	0.472704	0.464781	0.457879	0.483737	0.436424	0.523419	0.473073	0.505794	0.479261	0.573114	0.531413
	0.540169	0.528248	0.569487	0.463488	0.440459	0.462789	0.457556	0.481194	0.434157	0.532129	0.462579	0.531717	0.470784	0.56295	0.509513
	0.551958	0.514911	0.580988	0.463569	0.442321	0.464263	0.457772	0.481153	0.434634	0.518193	0.461196	0.497865	0.463518	0.536512	0.530666
	0.554941	0.527799	0.561906	0.488831	0.456042	0.469044	0.461223	0.488413	0.440401	0.519541	0.470036	0.540104	0.490993	0.549096	0.520032
	0.585795	0.51626	0.568528	0.483714	0.487602	0.460398	0.454805	0.486362	0.437259	0.519654	0.47196	0.539799	0.495156	0.572146	0.545381
	0.560399	0.485988	0.563213	0.448948	0.450946	0.459004	0.435606	0.469095	0.424532	0.520328	0.450803	0.487039	0.480548	0.550911	0.527562
	0.548683	0.549828	0.570619	0.45301	0.456728	0.466733	0.445152	0.480743	0.418208	0.522351	0.453334	0.487801	0.462534	0.537238	0.529402
	0.550429	0.492432	0.562168	0.453578	0.462021	0.449602	0.452324	0.476519	0.430458	0.523812	0.458024	0.473925	0.485165	0.551092	0.517101
	0.547664	0.512963	0.559641	0.455121	0.456826	0.455697	0.441161	0.475575	0.437338	0.520974	0.455864	0.490851	0.484484	0.567124	0.537736
	0.578737	0.53694	0.565305	0.482577	0.459571	0.463147	0.454374	0.488495	0.431969	0.526397	0.467506	0.514639	0.469346	0.556718	0.529632
	0.564983	0.506819	0.56195	0.466412	0.437518	0.460398	0.461816	0.478487	0.430498	0.523222	0.464975	0.507319	0.461323	0.526106	0.522216
	0.569422	0.559568	0.573495	0.477947	0.444771	0.473307	0.463111	0.490833	0.434674	0.520553	0.468113	0.489936	0.475628	0.571783	0.543714
	0.568258	0.553574	0.574932	0.472179	0.461237	0.454143	0.461709	0.480087	0.438134	0.522969	0.465245	0.529277	0.476385	0.549882	0.555843
	0.56331	0.531545	0.569269	0.463325	0.444379	0.46753	0.464998	0.481276	0.432844	0.526622	0.459138	0.474382	0.476309	0.561982	0.544117
	0.551303	0.507418	0.571578	0.48217	0.447613	0.458884	0.45583	0.489521	0.433878	0.530949	0.453435	0.510979	0.486073	0.558836	0.541473
	0.567457	0.529747	0.57441	0.503127	0.443301	0.461912	0.473142	0.494606	0.439884	0.527043	0.46926	0.535224	0.494172	0.559259	0.52739
	0.555232	0.528248	0.57258	0.473966	0.477409	0.466295	0.452702	0.472786	0.435469	0.511787	0.450702	0.504727	0.477142	0.574384	0.542507
	0.564401	0.533643	0.559641	0.475916	0.46996	0.471076	0.464297	0.476642	0.443225	0.525329	0.466966	0.506252	0.464426	0.561982	0.522791
	0.557852	0.533044	0.563649	0.470555	0.462805	0.465538	0.465538	0.48181	0.443742	0.529235	0.475874	0.515706	0.473509	0.562526	0.529229
	0.562	0.533793	0.587654	0.489481	0.469176	0.473267	0.468828	0.495099	0.439009	0.52651	0.470475	0.538426	0.49281	0.560106	0.534288
	0.56149	0.513862	0.563388	0.456015	0.425561	0.461753	0.443965	0.470612	0.432844	0.528617	0.460926	0.489783	0.480926	0.53143	0.533425
	0.560763	0.507868	0.557811	0.473804	0.463001	0.456892	0.469906	0.485829	0.433321	0.526734	0.471319	0.528972	0.482213	0.567427	0.533023
	0.563892	0.485089	0.573364	0.472261	0.438793	0.443705	0.459174	0.468521	0.425526	0.515776	0.468079	0.498475	0.476612	0.534757	0.528309
	0.552612	0.496478	0.556591	0.460807	0.44977	0.453466	0.462679	0.465157	0.431373	0.511309	0.456978	0.468893	0.468211	0.54837	0.520607
	0.551303	0.511764	0.571622	0.454634	0.445359	0.461116	0.462949	0.486239	0.441157	0.527774	0.459509	0.49634	0.479337	0.57021	0.540783
	0.570077	0.492132	0.561645	0.469905	0.416446	0.467211	0.455399	0.479431	0.434634	0.52266	0.46123	0.512351	0.481078	0.561135	0.535265
	0.557342	0.504271	0.560033	0.455365	0.458591	0.454143	0.444936	0.479062	0.431532	0.515692	0.456708	0.489326	0.472449	0.568455	0.520837
	0.580338	0.537839	0.574453	0.458695	0.464569	0.468327	0.465807	0.483491	0.437855	0.51676	0.471825	0.546508	0.47858	0.548914	0.54929
	0.559962	0.511464	0.558029	0.45699	0.446535	0.46	0.453241	0.482835	0.429623	0.516226	0.456539	0.508387	0.477975	0.555025	0.53584
	0.549774	0.509666	0.56574	0.454553	0.450162	0.460757	0.457178	0.476231	0.420236	0.531286	0.467067	0.540714	0.485014	0.539718	0.545899
	0.547009	0.466357	0.560512	0.423524	0.411448	0.449761	0.442347	0.457487	0.411367	0.522267	0.455088	0.466301	0.469043	0.553331	0.526643
	0.549847	0.551776	0.56513	0.480465	0.469568	0.463665	0.4561	0.487183	0.441236	0.516957	0.466763	0.526837	0.497351	0.554722	0.545841
	0.528089	0.437434	0.542912	0.427991	0.424875	0.446335	0.445907	0.456544	0.417134	0.495743	0.447496	0.427722	0.445958	0.52901	0.485429
	0.548319	0.488236	0.546136	0.483145	0.436832	0.452191	0.450005	0.465157	0.429344	0.509089	0.459914	0.49756	0.45875	0.555871	0.513192
	0.544753	0.515211	0.57014	0.489318	0.461629	0.471116	0.461169	0.469997	0.432248	0.522857	0.463153	0.512961	0.474417	0.563978	0.537679
	0.541624	0.542634	0.56134	0.466737	0.455944	0.460996	0.459497	0.47779	0.429503	0.519429	0.467877	0.527905	0.478656	0.565491	0.540266
	0.558507	0.49468	0.567309	0.463163	0.455356	0.461912	0.463057	0.496739	0.442151	0.525723	0.469901	0.497865	0.473736	0.547281	0.527217
	0.556251	0.490484	0.566394	0.447648	0.444575	0.449522	0.451839	0.480005	0.432765	0.52207	0.464671	0.503355	0.459431	0.553633	0.5048
	0.568549	0.544433	0.570053	0.473398	0.47192	0.466375	0.461385	0.466716	0.429543	0.522323	0.461601	0.466301	0.467075	0.567366	0.537449
	0.560472	0.541585	0.563213	0.462026	0.440949	0.461873	0.437817	0.478815	0.42489	0.518193	0.453165	0.511131	0.474871	0.563736	0.519285
	0.568476	0.521654	0.572928	0.481277	0.48966	0.472948	0.460954	0.490628	0.432566	0.5271	0.474625	0.545136	0.47911	0.569605	0.54906
	0.539005	0.475648	0.557332	0.468849	0.484073	0.463307	0.446338	0.480948	0.43014	0.517631	0.4643	0.480329	0.47525	0.543288	0.506237
	0.557852	0.519107	0.571447	0.46893	0.472116	0.465777	0.462733	0.473278	0.444299	0.522379	0.465346	0.515401	0.471465	0.555327	0.538196
	0.549556	0.52585	0.558421	0.459345	0.447907	0.464861	0.461277	0.486321	0.442588	0.52148	0.467	0.503355	0.470557	0.536512	0.546588
	0.561563	0.479095	0.548575	0.4431	0.43742	0.459283	0.444504	0.483368	0.427316	0.520272	0.462748	0.518451	0.463367	0.543469	0.512962
	0.566657	0.511164	0.570227	0.470961	0.431932	0.462311	0.453781	0.478487	0.424571	0.517771	0.473748	0.513266	0.486376	0.554117	0.534402
	0.550284	0.481642	0.559641	0.425473	0.423601	0.457131	0.445313	0.474181	0.43002	0.504987	0.450466	0.491766	0.467757	0.550003	0.532908
	0.573352	0.514761	0.572144	0.475022	0.445751	0.46	0.464297	0.472417	0.441355	0.512602	0.470947	0.49878	0.484559	0.56174	0.534115
	0.571314	0.496029	0.561122	0.465356	0.453984	0.465458	0.459659	0.474878	0.422981	0.50642	0.468822	0.482159	0.454965	0.558291	0.534288
	0.564765	0.519706	0.556548	0.45699	0.456826	0.450598	0.439866	0.47861	0.436901	0.515074	0.457079	0.487191	0.477596	0.553875	0.536242
	0.541479	0.508767	0.568441	0.46032	0.456238	0.44761	0.455129	0.494032	0.437975	0.509483	0.467742	0.49512	0.474796	0.558896	0.529574
	0.543443	0.502323	0.555938	0.475347	0.455944	0.452869	0.458634	0.470243	0.434236	0.517406	0.462714	0.519976	0.483121	0.559925	0.532965
	0.565565	0.524951	0.556243	0.471123	0.450162	0.45259	0.460037	0.475575	0.439407	0.524487	0.47061	0.526837	0.473282	0.554783	0.528597
	0.542352	0.470103	0.55694	0.45569	0.457218	0.464263	0.439812	0.475247	0.429623	0.505493	0.467	0.517688	0.460566	0.527739	0.516641
	0.564692	0.534842	0.568354	0.470392	0.4532	0.465737	0.461331	0.488536	0.439526	0.512967	0.459374	0.535377	0.470406	0.559683	0.555268
	0.58223	0.535291	0.575586	0.47486	0.458591	0.456135	0.46036	0.478446	0.425407	0.513529	0.477257	0.550625	0.470633	0.557202	0.530609
	0.557051	0.474449	0.563649	0.432215	0.437028	0.445657	0.452271	0.4677	0.425287	0.524936	0.468046	0.50427	0.455268	0.5448	0.523998
	0.558434	0.506219	0.561776	0.461863	0.432716	0.456534	0.450329	0.463968	0.435071	0.512517	0.458395	0.507624	0.475401	0.555025	0.519515
	0.557488	0.536191	0.56696	0.469986	0.453004	0.460438	0.461169	0.46163	0.423418	0.519794	0.46069	0.507777	0.453527	0.564644	0.515721
	0.539223	0.471003	0.558465	0.460482	0.43301	0.446454	0.456585	0.482138	0.423219	0.517097	0.456506	0.491461	0.459809	0.532579	0.540151
	0.573279	0.562416	0.563039	0.477622	0.466235	0.469801	0.478373	0.487839	0.432049	0.529123	0.468957	0.533547	0.486452	0.563071	0.548255
	0.580047	0.518208	0.557071	0.489318	0.44879	0.469124	0.463812	0.481851	0.441077	0.511702	0.470509	0.53004	0.484484	0.555388	0.51141
	0.553704	0.485239	0.55376	0.472179	0.451926	0.454143	0.451515	0.461384	0.429981	0.519485	0.463018	0.486886	0.481078	0.526469	0.507616
	0.547446	0.489435	0.566045	0.457152	0.448692	0.441873	0.445961	0.468931	0.437219	0.515945	0.450904	0.455932	0.460566	0.547583	0.515894
	0.527725	0.480444	0.561297	0.445618	0.407821	0.442112	0.43663	0.460605	0.414549	0.510663	0.460285	0.479262	0.459204	0.527074	0.506639
	0.542206	0.509816	0.558988	0.442044	0.429874	0.454861	0.437439	0.462573	0.423299	0.499845	0.45276	0.50244	0.44558	0.527134	0.523309
	0.556906	0.517908	0.566219	0.460239	0.441145	0.461952	0.454428	0.473319	0.417412	0.527774	0.459407	0.513266	0.490312	0.551213	0.542795
	0.541988	0.530346	0.572319	0.470961	0.463197	0.463625	0.462086	0.473771	0.432645	0.515524	0.468855	0.508539	0.487057	0.558533	0.521987
	0.560035	0.523003	0.565435	0.476566	0.443301	0.458207	0.445529	0.486403	0.428787	0.515215	0.481846	0.484294	0.477975	0.576683	0.533425
	0.576117	0.53679	0.568006	0.478759	0.448594	0.468327	0.458473	0.488003	0.428071	0.520862	0.470644	0.528515	0.499319	0.548128	0.531413
	0.526124	0.494081	0.561209	0.453984	0.448103	0.450677	0.457017	0.465075	0.42135	0.505746	0.461567	0.483837	0.463442	0.542864	0.542507
	0.550065	0.490634	0.572275	0.455852	0.454474	0.449323	0.453133	0.466224	0.423219	0.509061	0.463659	0.47362	0.469119	0.540626	0.500431
	0.545408	0.507718	0.55572	0.464869	0.436832	0.450876	0.456369	0.476149	0.42652	0.51277	0.459677	0.46996	0.462913	0.542199	0.507099
	0.565056	0.517758	0.575107	0.477297	0.463883	0.449482	0.448549	0.475698	0.431929	0.518024	0.470408	0.550015	0.47578	0.550306	0.523366
	0.567749	0.533493	0.551015	0.46495	0.449378	0.455219	0.465699	0.478733	0.430975	0.51631	0.457248	0.508082	0.46647	0.547341	0.522216
	0.530127	0.467406	0.564477	0.444887	0.444281	0.453347	0.449466	0.460974	0.420714	0.512377	0.462141	0.516621	0.455419	0.520298	0.524746
	0.563382	0.554174	0.557376	0.481927	0.45614	0.467211	0.457124	0.47496	0.429344	0.513894	0.464536	0.526075	0.461626	0.542501	0.52601
	0.554359	0.51611	0.564564	0.475347	0.440165	0.446215	0.455884	0.464747	0.427992	0.521312	0.46484	0.550015	0.458977	0.537843	0.528539
	0.544026	0.46291	0.554631	0.436601	0.432716	0.443347	0.430914	0.460194	0.414032	0.504791	0.461297	0.430924	0.442931	0.513159	0.512215
	0.564401	0.463809	0.566873	0.475347	0.437812	0.463147	0.44828	0.473237	0.423378	0.508471	0.463052	0.487801	0.472222	0.54359	0.524113
	0.538932	0.470553	0.562996	0.445699	0.418014	0.453028	0.452324	0.466347	0.427515	0.509904	0.466561	0.508234	0.468362	0.548188	0.517446
	0.53915	0.496928	0.559292	0.451466	0.451044	0.453466	0.457502	0.480374	0.424293	0.523475	0.477359	0.497865	0.470708	0.531611	0.521987
	0.550211	0.528398	0.572928	0.477134	0.467118	0.465618	0.447902	0.476929	0.432924	0.520328	0.480126	0.523178	0.474342	0.563434	0.526183
	0.561126	0.528098	0.570271	0.480058	0.442125	0.47012	0.457879	0.474673	0.434634	0.521003	0.46953	0.540714	0.476839	0.569181	0.527045
	0.549556	0.502922	0.562386	0.495736	0.487896	0.466494	0.467803	0.483942	0.435708	0.510241	0.465346	0.541934	0.485543	0.558957	0.51802
	0.548319	0.46276	0.55694	0.464788	0.421347	0.453944	0.446392	0.472253	0.416975	0.507994	0.456573	0.482312	0.463291	0.535665	0.514744
	0.542425	0.501124	0.562211	0.460726	0.453298	0.4549	0.448441	0.471597	0.42656	0.514175	0.462546	0.465233	0.46594	0.530401	0.526643
	0.570004	0.513412	0.570794	0.469661	0.439087	0.454422	0.463866	0.468274	0.425486	0.520244	0.462681	0.483989	0.474114	0.554964	0.491579
	0.544026	0.498127	0.566873	0.458452	0.446339	0.449363	0.422392	0.458554	0.421151	0.509342	0.459846	0.478957	0.458523	0.529494	0.505489
	0.543516	0.496928	0.561819	0.468443	0.454768	0.46247	0.449304	0.471228	0.415304	0.514849	0.465447	0.504117	0.471768	0.548793	0.518365
	0.55545	0.518807	0.571273	0.473885	0.462707	0.460757	0.447039	0.485009	0.432049	0.526397	0.470543	0.535224	0.478126	0.557021	0.538484
	0.569786	0.517309	0.585345	0.483064	0.493384	0.457052	0.453026	0.480702	0.431452	0.512967	0.482116	0.532022	0.480472	0.557142	0.513019
	0.543662	0.49483	0.569443	0.460726	0.451142	0.461992	0.449736	0.466962	0.427475	0.514849	0.471454	0.513571	0.477293	0.556658	0.507156
	0.556324	0.506968	0.56452	0.462432	0.453494	0.460518	0.450976	0.475288	0.431969	0.507375	0.466055	0.50244	0.486376	0.541473	0.521584
	0.535657	0.495429	0.553673	0.46032	0.453592	0.456972	0.451084	0.470612	0.429066	0.507123	0.470205	0.538579	0.471617	0.547886	0.516986
	0.548974	0.48419	0.553324	0.472748	0.425169	0.444821	0.442617	0.472663	0.42489	0.506027	0.45357	0.510369	0.467151	0.550064	0.513939
	0.567239	0.461711	0.562908	0.462919	0.437322	0.452789	0.456154	0.480005	0.432804	0.520019	0.454312	0.524093	0.463669	0.559501	0.515434
	0.549847	0.515211	0.555284	0.454147	0.44977	0.455817	0.452432	0.461589	0.418367	0.512995	0.457079	0.519823	0.438995	0.545042	0.509916
	0.55596	0.525101	0.574802	0.463325	0.460257	0.459044	0.45761	0.473401	0.428469	0.513416	0.464975	0.538579	0.485468	0.548793	0.51917
	0.542934	0.512813	0.551843	0.472992	0.45124	0.45494	0.453079	0.462983	0.430736	0.514653	0.456641	0.47362	0.467075	0.544982	0.510835
	0.542716	0.487787	0.558857	0.459914	0.451632	0.445618	0.4369	0.470694	0.431333	0.515046	0.453131	0.520586	0.445353	0.536149	0.505834
	0.560108	0.45212	0.561776	0.452441	0.429678	0.45255	0.428163	0.457036	0.410373	0.507853	0.456337	0.487801	0.455949	0.528163	0.505317
	0.543735	0.480144	0.557245	0.45236	0.455748	0.457331	0.455992	0.457159	0.423577	0.502824	0.466797	0.510674	0.468968	0.539658	0.515836
	0.544098	0.468005	0.541866	0.450816	0.433794	0.464582	0.45103	0.459702	0.420356	0.508893	0.448542	0.512046	0.447245	0.533124	0.505202
	0.553631	0.479544	0.557376	0.459183	0.45026	0.443307	0.443318	0.461507	0.423179	0.511281	0.457585	0.481702	0.476536	0.525319	0.513652
	0.547519	0.56826	0.554849	0.476241	0.455846	0.455657	0.455722	0.462737	0.426958	0.511759	0.47142	0.463708	0.465562	0.535483	0.519802
	0.560472	0.468905	0.551799	0.43782	0.44928	0.438127	0.441376	0.46971	0.418844	0.504959	0.467877	0.47606	0.441493	0.532337	0.502903
	0.556906	0.499775	0.558378	0.473804	0.439381	0.453705	0.460306	0.465075	0.426838	0.508275	0.461297	0.477127	0.462458	0.530401	0.503822
	0.534566	0.478795	0.550057	0.433027	0.441831	0.447211	0.437278	0.453263	0.419083	0.505493	0.462512	0.476365	0.451559	0.530946	0.497442
	0.557997	0.50532	0.558988	0.446268	0.439185	0.458964	0.440459	0.480538	0.42127	0.50937	0.465515	0.521805	0.463972	0.553028	0.520435
	0.532601	0.49483	0.55071	0.465437	0.41282	0.446853	0.443803	0.476683	0.417253	0.509539	0.460454	0.483684	0.478504	0.515942	0.507961
	0.563964	0.487936	0.552758	0.445699	0.440165	0.439084	0.447578	0.460235	0.425168	0.50642	0.468754	0.52882	0.479715	0.539113	0.517675
	0.541479	0.508167	0.553978	0.444156	0.445849	0.43761	0.437709	0.456995	0.420912	0.503133	0.463693	0.497713	0.454662	0.522839	0.489165
	0.517756	0.468455	0.549752	0.457558	0.418504	0.449004	0.444019	0.452771	0.424094	0.510241	0.45573	0.49634	0.465032	0.519753	0.501638
	0.544244	0.480144	0.562908	0.450898	0.444281	0.451434	0.441161	0.466634	0.434992	0.508471	0.463018	0.490698	0.463367	0.535241	0.499626
	0.556178	0.516709	0.551233	0.479246	0.448888	0.449602	0.463003	0.474386	0.423975	0.517462	0.463659	0.507929	0.476839	0.546857	0.524171
	0.545117	0.481193	0.551276	0.458695	0.439185	0.444861	0.441538	0.455355	0.427554	0.506083	0.46457	0.452272	0.457841	0.522294	0.506237
	0.555305	0.479994	0.557942	0.488669	0.445457	0.451833	0.452378	0.467987	0.428946	0.509567	0.468046	0.503965	0.469573	0.565914	0.508364
	0.571678	0.521954	0.556766	0.466981	0.453298	0.446096	0.446284	0.468644	0.420475	0.517912	0.475975	0.520586	0.460718	0.553875	0.502328
	0.57277	0.517608	0.566568	0.451385	0.456532	0.454821	0.456963	0.46606	0.434793	0.505352	0.481239	0.535987	0.458523	0.550427	0.520147
	0.527507	0.457665	0.538163	0.427098	0.407331	0.441594	0.448118	0.454657	0.423339	0.497373	0.455898	0.465843	0.439298	0.519269	0.486118
	0.548683	0.507568	0.563954	0.485663	0.448005	0.454701	0.463003	0.473689	0.426679	0.513332	0.466358	0.532937	0.46314	0.552907	0.534517
	0.530345	0.439532	0.543435	0.438713	0.419092	0.441514	0.428217	0.451499	0.418009	0.509174	0.454481	0.469045	0.458825	0.544135	0.486693
	0.547882	0.498277	0.568136	0.455852	0.430462	0.447649	0.445098	0.451499	0.426162	0.510972	0.454683	0.516316	0.464124	0.533789	0.52032
	0.531509	0.478645	0.555284	0.45236	0.409879	0.452869	0.442994	0.463066	0.427435	0.513079	0.458463	0.517383	0.46488	0.520963	0.494913
	0.553995	0.475199	0.555415	0.440419	0.438204	0.438606	0.447902	0.471966	0.420236	0.506392	0.457113	0.474077	0.462685	0.526711	0.500316
	0.545554	0.46306	0.549752	0.468118	0.436538	0.448924	0.458634	0.465034	0.435986	0.503105	0.46123	0.489631	0.457009	0.534878	0.512042
	0.558652	0.530196	0.565958	0.461376	0.466921	0.458088	0.457987	0.481933	0.431373	0.514315	0.467405	0.539036	0.454511	0.547402	0.524401
	0.550939	0.49513	0.565348	0.457233	0.433304	0.448566	0.437331	0.4677	0.413157	0.508443	0.460015	0.509302	0.44785	0.537601	0.49635
	0.545772	0.493631	0.543696	0.469743	0.462217	0.464462	0.45432	0.467249	0.432844	0.509595	0.462343	0.530497	0.453754	0.537419	0.509743
	0.531291	0.506669	0.543653	0.439119	0.420661	0.450837	0.4561	0.462491	0.419878	0.503049	0.456911	0.523025	0.451332	0.527497	0.524573
	0.562145	0.486288	0.570707	0.466412	0.476429	0.47506	0.46543	0.480907	0.427037	0.514877	0.455122	0.493901	0.498713	0.551334	0.529574
	0.544389	0.469504	0.552235	0.445212	0.412036	0.451195	0.442455	0.468151	0.418446	0.503807	0.455392	0.485209	0.449213	0.52544	0.491522
	0.562072	0.495729	0.565305	0.449111	0.4729	0.447769	0.473142	0.477995	0.428509	0.510129	0.463119	0.52211	0.460718	0.54722	0.501178
	0.555669	0.489435	0.562734	0.463894	0.473194	0.451116	0.450491	0.480661	0.444497	0.51499	0.466325	0.510064	0.463972	0.540686	0.511812
	0.514117	0.437884	0.537989	0.420599	0.404979	0.440199	0.430051	0.452894	0.412878	0.504987	0.459171	0.427112	0.457312	0.523928	0.484566
	0.560544	0.519407	0.559205	0.454228	0.466333	0.45753	0.456369	0.46647	0.429861	0.506392	0.463727	0.519061	0.477218	0.539234	0.51118
	0.538059	0.503072	0.553455	0.464219	0.442713	0.455857	0.449682	0.464583	0.427117	0.512939	0.455021	0.49878	0.463594	0.552121	0.518078
	0.546136	0.469504	0.55877	0.455365	0.415368	0.44259	0.440783	0.459661	0.433759	0.499452	0.458496	0.46874	0.463367	0.558291	0.475944
	0.548465	0.485838	0.558857	0.441881	0.438989	0.433625	0.453996	0.458472	0.416458	0.510213	0.453266	0.485056	0.447926	0.518785	0.500776
	0.560544	0.491233	0.569269	0.459995	0.439675	0.454781	0.459875	0.463353	0.429066	0.512124	0.471319	0.521043	0.496821	0.534757	0.501063
	0.553486	0.497377	0.560164	0.444481	0.449574	0.44753	0.447363	0.466675	0.426282	0.507291	0.461061	0.528972	0.471617	0.523807	0.532563
	0.5318	0.4734	0.563431	0.442856	0.436048	0.453625	0.453781	0.464009	0.421787	0.511562	0.455662	0.469198	0.475553	0.515639	0.507214
	0.544026	0.480144	0.564782	0.46365	0.44977	0.45	0.453133	0.479103	0.429463	0.505296	0.453435	0.492223	0.472449	0.523625	0.512617
	0.543662	0.468605	0.551189	0.443425	0.424581	0.453108	0.438572	0.459497	0.410174	0.510522	0.459509	0.481397	0.468665	0.528949	0.500604
	0.534857	0.504121	0.551015	0.447405	0.439283	0.449721	0.431723	0.45314	0.419759	0.50361	0.460993	0.479109	0.458447	0.518725	0.501811
	0.527871	0.436985	0.545003	0.416132	0.41968	0.443865	0.436576	0.450228	0.410452	0.507151	0.455493	0.502135	0.445126	0.502692	0.500833
	0.542279	0.487936	0.558639	0.445374	0.43595	0.453865	0.446877	0.467126	0.419839	0.50878	0.462782	0.484751	0.451029	0.544558	0.518135
	0.548828	0.451671	0.551233	0.436764	0.433108	0.465498	0.441484	0.460523	0.421708	0.50347	0.45907	0.515096	0.438314	0.509589	0.521642
	0.560399	0.51626	0.562255	0.465356	0.460649	0.460438	0.462949	0.472827	0.416696	0.519008	0.458631	0.519823	0.477142	0.543711	0.514629
	0.552612	0.532894	0.554718	0.475591	0.440557	0.451434	0.453781	0.469587	0.429384	0.513248	0.467	0.524093	0.470406	0.534818	0.526413
	0.555378	0.476697	0.566829	0.454959	0.459767	0.451036	0.446931	0.462327	0.436821	0.508837	0.473377	0.49817	0.464805	0.538448	0.524401
	0.524523	0.509066	0.548619	0.457721	0.443791	0.45012	0.441484	0.44871	0.421429	0.509848	0.464874	0.50244	0.453149	0.528284	0.50273
	0.545408	0.498726	0.557376	0.459183	0.408703	0.446614	0.450329	0.459579	0.413356	0.498413	0.452659	0.484446	0.454511	0.51213	0.490659
	0.522777	0.50517	0.554805	0.444805	0.430462	0.451394	0.444127	0.46446	0.426878	0.502571	0.457079	0.515858	0.456252	0.545163	0.492959
	0.52707	0.461262	0.552191	0.446592	0.439969	0.450319	0.443156	0.453386	0.425248	0.507123	0.462546	0.471028	0.441795	0.539718	0.526413
	0.531145	0.484939	0.574976	0.475347	0.443693	0.456813	0.448441	0.48304	0.420157	0.506561	0.478506	0.513419	0.458144	0.52296	0.5121
	0.553704	0.482392	0.568354	0.458614	0.424679	0.449084	0.439381	0.463804	0.418248	0.510747	0.46457	0.509607	0.475931	0.535423	0.507961
	0.532674	0.450022	0.565261	0.455934	0.443693	0.444582	0.462733	0.48587	0.430299	0.509117	0.456337	0.468435	0.446412	0.512372	0.498994
	0.554068	0.524652	0.558683	0.472667	0.441243	0.456614	0.453295	0.47172	0.432168	0.521059	0.467776	0.517078	0.494929	0.564039	0.515319
	0.540169	0.463809	0.552366	0.448217	0.438204	0.436056	0.440459	0.465239	0.414787	0.505746	0.468687	0.47484	0.455798	0.51207	0.48744
	0.530709	0.489735	0.551015	0.425229	0.449868	0.440876	0.437385	0.475657	0.421668	0.49549	0.452355	0.510369	0.459128	0.525501	0.500833
	0.552321	0.512663	0.558421	0.462838	0.460747	0.464303	0.450437	0.470817	0.425765	0.501728	0.465279	0.535682	0.467908	0.514671	0.5267
	0.547737	0.501424	0.554195	0.463894	0.458787	0.457849	0.45076	0.469997	0.41964	0.496923	0.45799	0.518146	0.466848	0.537782	0.505604
	0.545772	0.45242	0.555764	0.455121	0.449084	0.454024	0.462302	0.472499	0.437895	0.49476	0.449926	0.47179	0.45716	0.538085	0.504167
	0.521321	0.440132	0.550972	0.448298	0.429776	0.441116	0.437979	0.461015	0.404805	0.491922	0.463153	0.46935	0.447775	0.51213	0.499856
	0.551739	0.516559	0.562124	0.463975	0.458395	0.461594	0.475623	0.48423	0.447958	0.507235	0.474119	0.527447	0.49175	0.54722	0.515434
	0.529035	0.497377	0.54827	0.457315	0.41968	0.436096	0.44348	0.467659	0.415304	0.498553	0.456978	0.518451	0.440054	0.530704	0.483532
	0.540533	0.48464	0.549055	0.443262	0.439969	0.455299	0.438464	0.452935	0.419719	0.499593	0.460319	0.470265	0.464199	0.510194	0.495143
	0.549265	0.484939	0.567178	0.450004	0.426933	0.447052	0.457987	0.468644	0.429901	0.502149	0.465549	0.474382	0.459734	0.527679	0.507444
	0.538422	0.461861	0.554718	0.446268	0.465647	0.446096	0.454751	0.46848	0.422981	0.501335	0.458496	0.489021	0.457009	0.535362	0.493188
	0.546718	0.489735	0.550841	0.455284	0.438891	0.450876	0.452648	0.46971	0.421231	0.522801	0.461567	0.511436	0.488722	0.518664	0.485601
	0.556033	0.486438	0.554849	0.452685	0.436048	0.44988	0.457718	0.470653	0.424213	0.51055	0.470171	0.506557	0.467	0.533789	0.496867
	0.551157	0.491983	0.564564	0.454147	0.444771	0.442151	0.464405	0.475903	0.42481	0.509455	0.453705	0.484751	0.458068	0.528768	0.497327
	0.554868	0.455717	0.566699	0.493624	0.450162	0.44761	0.459929	0.473483	0.431094	0.505493	0.466392	0.514029	0.466546	0.528042	0.515549
	0.527871	0.499925	0.558813	0.476566	0.430266	0.449163	0.452001	0.481153	0.43873	0.514203	0.465076	0.497255	0.479186	0.537782	0.519515
	0.549629	0.438933	0.56256	0.441231	0.435264	0.4451	0.446769	0.45679	0.41777	0.499171	0.449993	0.474535	0.46647	0.520358	0.494338
	0.511498	0.460063	0.536334	0.454878	0.43595	0.452112	0.461924	0.456421	0.415901	0.501026	0.464098	0.494358	0.451635	0.510497	0.490372
	0.523286	0.461412	0.539252	0.425392	0.429874	0.439044	0.453888	0.470489	0.426043	0.501082	0.45799	0.444648	0.452165	0.518483	0.51256
	0.549119	0.48434	0.556635	0.453091	0.43644	0.451753	0.452378	0.475821	0.426401	0.505802	0.466662	0.531107	0.452997	0.50602	0.497097
	0.547955	0.454668	0.547051	0.472098	0.428011	0.447371	0.450599	0.471884	0.419123	0.504931	0.458665	0.485514	0.481532	0.522294	0.478473
	0.547373	0.463959	0.558988	0.45764	0.454964	0.460956	0.450922	0.479882	0.421628	0.507544	0.462681	0.529887	0.472071	0.517636	0.491292
	0.560035	0.508917	0.560817	0.483145	0.429089	0.460956	0.469151	0.470325	0.424412	0.503442	0.466628	0.557944	0.495156	0.552242	0.506869
	0.569932	0.529897	0.565087	0.460482	0.451044	0.455538	0.467317	0.478569	0.440043	0.511169	0.465616	0.526228	0.471238	0.533668	0.503248
	0.559162	0.477896	0.571622	0.459995	0.465843	0.462271	0.460198	0.476149	0.426759	0.506645	0.467607	0.507472	0.487057	0.532156	0.505202
	0.53915	0.445527	0.5457	0.446999	0.413604	0.440717	0.45254	0.462245	0.411486	0.499312	0.452153	0.480787	0.442325	0.507835	0.510605
	0.528962	0.459613	0.544132	0.445943	0.418896	0.440637	0.43868	0.462901	0.412759	0.502964	0.456843	0.466148	0.461929	0.524109	0.480313
	0.538713	0.496778	0.557158	0.460158	0.438204	0.467371	0.462949	0.468808	0.434236	0.504594	0.462377	0.517078	0.473509	0.519027	0.508996
	0.53231	0.493481	0.563039	0.437657	0.431148	0.45502	0.455614	0.463312	0.415742	0.495912	0.463963	0.47789	0.463896	0.522839	0.501121
	0.528307	0.453469	0.538904	0.435221	0.448888	0.446016	0.442994	0.464214	0.411685	0.49476	0.456843	0.446935	0.449213	0.514066	0.482899
	0.523868	0.450022	0.54631	0.447567	0.427227	0.443147	0.446122	0.470735	0.414191	0.496923	0.451748	0.481397	0.452997	0.517999	0.503995
	0.553413	0.483441	0.565217	0.471286	0.453298	0.447968	0.458473	0.477257	0.425049	0.506308	0.452018	0.499543	0.474114	0.507109	0.500489
	0.549774	0.49483	0.562255	0.478434	0.45418	0.445857	0.453673	0.473894	0.429106	0.500464	0.450398	0.515554	0.473736	0.522355	0.516583
	0.544098	0.465308	0.56317	0.450898	0.45516	0.461076	0.451623	0.472499	0.416816	0.512377	0.460892	0.481244	0.455571	0.522355	0.495315
	0.548101	0.475948	0.554718	0.440338	0.408017	0.452151	0.452756	0.467741	0.415901	0.500548	0.450837	0.480329	0.469497	0.518604	0.506179
	0.559526	0.472052	0.561601	0.448298	0.448594	0.447171	0.465268	0.462614	0.425248	0.502009	0.463187	0.496035	0.454511	0.519874	0.505317
	0.559817	0.495279	0.549447	0.446592	0.408899	0.450876	0.435066	0.467782	0.412958	0.501026	0.453604	0.49634	0.464729	0.514611	0.491636
	0.54126	0.474749	0.552714	0.431322	0.420465	0.443068	0.453996	0.467454	0.414907	0.501363	0.455257	0.49939	0.450651	0.516486	0.474392
	0.543662	0.475948	0.556591	0.451547	0.428305	0.442271	0.456261	0.461384	0.419401	0.501054	0.448509	0.428637	0.465713	0.502874	0.483647
	0.543516	0.454968	0.548053	0.449111	0.439871	0.441434	0.449358	0.46971	0.428588	0.497935	0.460588	0.502592	0.459658	0.53149	0.469276
	0.569058	0.464559	0.565871	0.433271	0.418798	0.445578	0.459066	0.456585	0.43527	0.497879	0.456539	0.49939	0.463291	0.52786	0.501466
	0.551011	0.485539	0.556025	0.435952	0.430266	0.45255	0.474868	0.470284	0.419441	0.505043	0.452322	0.478652	0.431653	0.519753	0.504742
	0.535657	0.474299	0.555328	0.437008	0.422523	0.451076	0.462949	0.477831	0.422861	0.495856	0.458226	0.524093	0.466621	0.534213	0.505202
	0.55072	0.471302	0.545744	0.447648	0.435754	0.443825	0.462356	0.455888	0.422742	0.492765	0.471386	0.471943	0.460188	0.521387	0.488188
	0.563382	0.502623	0.58003	0.453659	0.438008	0.452709	0.477295	0.48386	0.427037	0.50569	0.463862	0.545288	0.482667	0.51818	0.521009
	0.546645	0.466807	0.562821	0.448786	0.424973	0.453187	0.451515	0.465896	0.41606	0.498328	0.465447	0.478347	0.448456	0.515639	0.480773
	0.567676	0.480593	0.571752	0.435627	0.459375	0.458924	0.461115	0.478733	0.422662	0.49993	0.461871	0.493901	0.472676	0.512856	0.490372
	0.528671	0.477147	0.55877	0.440582	0.41478	0.450916	0.450976	0.459579	0.411248	0.504538	0.452929	0.445868	0.449364	0.494706	0.494626
	0.536021	0.475049	0.556722	0.471448	0.437322	0.449044	0.466724	0.471392	0.415901	0.503105	0.467708	0.494968	0.455419	0.51697	0.504052
	0.52416	0.481493	0.549534	0.445455	0.447711	0.447649	0.452648	0.47656	0.422662	0.504931	0.450196	0.499695	0.462156	0.52181	0.495775
	0.531291	0.499625	0.551494	0.457233	0.433696	0.445976	0.459389	0.468931	0.42656	0.502149	0.463693	0.505947	0.481532	0.521508	0.514457
	0.552758	0.483141	0.569922	0.435952	0.436538	0.458486	0.461709	0.477011	0.432844	0.503582	0.459273	0.510064	0.466016	0.538932	0.503363
	0.516883	0.446426	0.551059	0.417838	0.401353	0.440159	0.438087	0.450433	0.415543	0.492512	0.444831	0.448307	0.429458	0.49277	0.486061
	0.53231	0.489735	0.549621	0.445374	0.456336	0.455219	0.457502	0.467413	0.417691	0.502346	0.456944	0.490546	0.469119	0.536693	0.493763
	0.54257	0.404915	0.542128	0.418894	0.414682	0.437211	0.441754	0.463517	0.410054	0.485291	0.437306	0.464776	0.421132	0.500756	0.4879
	0.527143	0.453769	0.553193	0.454878	0.427129	0.448446	0.429781	0.477216	0.425924	0.498047	0.450398	0.516773	0.469724	0.52423	0.504742
	0.524014	0.492732	0.550797	0.433758	0.441733	0.441514	0.44801	0.469833	0.418606	0.500997	0.452423	0.5	0.459961	0.508984	0.493821
	0.554796	0.500525	0.554413	0.460645	0.442713	0.452271	0.456369	0.481071	0.427674	0.500913	0.457383	0.515706	0.456101	0.531672	0.502788
	0.522631	0.478346	0.561384	0.441394	0.441145	0.46008	0.445799	0.466101	0.421071	0.504453	0.465717	0.513114	0.44611	0.512977	0.501006
	0.538568	0.482691	0.550013	0.436033	0.409193	0.448964	0.440513	0.474017	0.435907	0.499761	0.45357	0.454254	0.474871	0.516123	0.499052
	0.538786	0.491833	0.552148	0.42856	0.438302	0.458805	0.456315	0.486608	0.419998	0.489197	0.44753	0.521348	0.448153	0.517636	0.503248
	0.533183	0.486887	0.546876	0.453741	0.43742	0.46004	0.449142	0.463845	0.427276	0.493973	0.454582	0.507167	0.462004	0.537238	0.502673
	0.568258	0.517009	0.551581	0.46227	0.44879	0.463147	0.461061	0.470653	0.422026	0.509595	0.455864	0.533089	0.461777	0.540505	0.503133
	0.536312	0.491683	0.557027	0.443262	0.405273	0.450837	0.460684	0.463599	0.43014	0.503751	0.450466	0.497408	0.44891	0.519511	0.521642
	0.524596	0.460662	0.552104	0.434327	0.419386	0.438367	0.447471	0.458226	0.418645	0.494563	0.455291	0.475602	0.455571	0.512977	0.4879
	0.560108	0.485689	0.543217	0.45764	0.447025	0.467171	0.451084	0.458021	0.415702	0.506982	0.458294	0.512656	0.477748	0.530038	0.506812
	0.543298	0.509366	0.551233	0.436764	0.437714	0.459562	0.461385	0.460317	0.419123	0.50125	0.461398	0.509302	0.47578	0.521145	0.507214
	0.550429	0.507568	0.547748	0.452847	0.436538	0.459283	0.465646	0.467618	0.421628	0.509202	0.452861	0.526685	0.474947	0.543227	0.48836
	0.523141	0.459014	0.551059	0.451141	0.435558	0.452869	0.455884	0.458718	0.418685	0.504425	0.457552	0.522873	0.467454	0.521326	0.500776
	0.529326	0.453469	0.549447	0.436114	0.447025	0.444024	0.458581	0.468808	0.417929	0.495884	0.466865	0.4785	0.454133	0.523867	0.50434
	0.522268	0.439532	0.544698	0.426935	0.437812	0.451355	0.44019	0.460317	0.417054	0.504734	0.452018	0.471333	0.448607	0.538932	0.476634
	0.534129	0.49513	0.554762	0.471286	0.448496	0.457052	0.469043	0.465321	0.425407	0.500239	0.454042	0.519213	0.472903	0.509347	0.519687
	0.522049	0.422299	0.546179	0.43782	0.426639	0.451873	0.438895	0.443952	0.411645	0.497626	0.451478	0.483684	0.435437	0.528223	0.49612
	0.553995	0.482092	0.552671	0.452847	0.436636	0.444303	0.443102	0.455929	0.414628	0.502178	0.45276	0.493901	0.463972	0.513824	0.4879
	0.547519	0.467556	0.546789	0.450167	0.449378	0.458048	0.452702	0.460523	0.42481	0.502627	0.453469	0.495578	0.438389	0.524533	0.503535
	0.538277	0.450022	0.553498	0.464788	0.447221	0.453785	0.453781	0.454329	0.417412	0.497963	0.459104	0.52821	0.452619	0.526469	0.502673
	0.547082	0.48374	0.54875	0.443425	0.454474	0.449641	0.459443	0.465444	0.431929	0.502936	0.451613	0.493596	0.440433	0.524775	0.494683
	0.5465	0.501574	0.554152	0.456259	0.460159	0.461833	0.466131	0.46323	0.424213	0.512967	0.463592	0.510979	0.467984	0.531067	0.49658
	0.532674	0.489585	0.555502	0.43254	0.435264	0.456454	0.443641	0.446167	0.410174	0.495799	0.452052	0.457304	0.46314	0.516184	0.484394
	0.52707	0.459763	0.536159	0.435952	0.433108	0.444064	0.443048	0.449489	0.415384	0.491529	0.440647	0.443123	0.444217	0.517031	0.477898
	0.511789	0.420051	0.536769	0.430509	0.406939	0.437052	0.432262	0.454493	0.427833	0.501728	0.443143	0.436566	0.450651	0.526408	0.488245
	0.553922	0.469054	0.557768	0.447892	0.459669	0.47012	0.461061	0.466347	0.433202	0.501644	0.46457	0.520891	0.448305	0.509287	0.496867
	0.540387	0.434587	0.534852	0.429291	0.413996	0.448526	0.455938	0.447562	0.398003	0.500885	0.446079	0.480482	0.444747	0.502087	0.473243
	0.533838	0.474449	0.544175	0.460482	0.431932	0.448685	0.447039	0.444239	0.419481	0.510747	0.450567	0.530345	0.480548	0.526106	0.500489
	0.548101	0.454518	0.555894	0.446024	0.420171	0.45012	0.43237	0.448792	0.411964	0.496642	0.459003	0.513114	0.452619	0.516789	0.514169
	0.544244	0.486887	0.552671	0.428479	0.438204	0.449522	0.452378	0.460728	0.422742	0.505746	0.452524	0.492681	0.457766	0.504386	0.494338
	0.542789	0.486588	0.54888	0.448379	0.427325	0.459562	0.44623	0.44711	0.418089	0.498693	0.449487	0.479262	0.473963	0.540505	0.50457
	0.555014	0.487637	0.546659	0.429941	0.414388	0.455299	0.447255	0.45761	0.417333	0.494676	0.444628	0.489021	0.464275	0.510618	0.487095
	0.531291	0.454368	0.554849	0.42791	0.402921	0.444542	0.439812	0.458841	0.417651	0.500014	0.452355	0.450137	0.445353	0.506322	0.489107
	0.562436	0.474599	0.551451	0.442287	0.443105	0.449801	0.446877	0.463066	0.422981	0.483914	0.460723	0.476822	0.452846	0.526953	0.493246
	0.558725	0.527948	0.552888	0.468849	0.4384	0.46255	0.462302	0.46971	0.420873	0.499733	0.465751	0.513266	0.469346	0.526166	0.491694
	0.532819	0.500674	0.564651	0.45902	0.443987	0.452629	0.444073	0.460482	0.43006	0.505943	0.460217	0.483227	0.451483	0.542985	0.501178
	0.541042	0.454518	0.543043	0.416538	0.437028	0.458486	0.443857	0.447808	0.412441	0.505999	0.451343	0.493138	0.458295	0.502874	0.503075
	0.541188	0.48389	0.548793	0.46365	0.451142	0.461036	0.447255	0.46081	0.416617	0.505971	0.456168	0.532174	0.470481	0.515397	0.486981
	0.547373	0.511164	0.557506	0.456259	0.43644	0.459562	0.447255	0.455108	0.423339	0.503554	0.459374	0.518298	0.469119	0.51812	0.48244
	0.526925	0.464109	0.55999	0.430184	0.435754	0.450279	0.445799	0.467864	0.431492	0.495743	0.453907	0.498323	0.456857	0.516607	0.501696
	0.539951	0.485239	0.546876	0.440094	0.43693	0.465578	0.444235	0.454616	0.419441	0.49875	0.460858	0.463708	0.453149	0.503539	0.507444
	0.54388	0.492132	0.549098	0.44976	0.436832	0.44996	0.454428	0.456544	0.425088	0.50052	0.4588	0.514944	0.477596	0.529615	0.50503
	0.560253	0.485988	0.559292	0.466818	0.455944	0.467769	0.462895	0.462081	0.432049	0.513304	0.463592	0.551083	0.481608	0.521447	0.511755
	0.552467	0.488686	0.55511	0.44245	0.457905	0.461793	0.465807	0.464419	0.417253	0.495153	0.459576	0.50427	0.471465	0.5278	0.494223
	0.535148	0.480593	0.546005	0.449354	0.427717	0.462629	0.459066	0.454247	0.4301	0.500716	0.462512	0.50488	0.483576	0.518483	0.483244
	0.550429	0.468905	0.562299	0.444805	0.443595	0.458526	0.454536	0.462327	0.425208	0.507825	0.467168	0.527295	0.466773	0.51334	0.508708
	0.551157	0.465008	0.5457	0.441475	0.446241	0.453307	0.447902	0.448751	0.420753	0.494985	0.465549	0.482617	0.44119	0.509831	0.513479
	0.551885	0.482841	0.553368	0.461295	0.454278	0.4649	0.459983	0.453509	0.426123	0.497373	0.457923	0.516011	0.478353	0.531793	0.493131
	0.532601	0.470703	0.538512	0.434571	0.406841	0.440159	0.4417	0.455724	0.415981	0.495519	0.448104	0.444343	0.468741	0.491923	0.50342
	0.528089	0.470103	0.545918	0.438795	0.425953	0.446096	0.430482	0.449694	0.425009	0.489562	0.452085	0.509302	0.448456	0.507169	0.491579
	0.533474	0.468305	0.55572	0.450004	0.436832	0.449203	0.459659	0.447726	0.43006	0.496895	0.45772	0.4785	0.479715	0.525985	0.488073
	0.543589	0.491533	0.548837	0.472504	0.440851	0.453546	0.450545	0.448341	0.423577	0.491276	0.458159	0.493138	0.454511	0.512554	0.502041
	0.528744	0.46366	0.551581	0.442531	0.434578	0.448964	0.446823	0.451827	0.420714	0.495153	0.453334	0.481854	0.444217	0.48182	0.485256
	0.536967	0.469504	0.552017	0.442044	0.410566	0.456972	0.443102	0.455232	0.417492	0.505128	0.456641	0.498933	0.464275	0.520177	0.486061
	0.52758	0.442829	0.540995	0.439119	0.408605	0.447809	0.442455	0.443747	0.425049	0.505268	0.448475	0.49634	0.453603	0.517817	0.466287
	0.546791	0.450622	0.55071	0.448298	0.453396	0.45	0.450383	0.460769	0.420077	0.499368	0.458395	0.511894	0.468059	0.531914	0.488015
	0.540751	0.465308	0.566481	0.457315	0.432618	0.443745	0.447039	0.462081	0.417054	0.502374	0.453637	0.50488	0.465259	0.507109	0.512675
	0.528016	0.47415	0.55755	0.422711	0.408017	0.460518	0.439273	0.464296	0.412123	0.502458	0.456978	0.472248	0.459052	0.505294	0.473357
	0.544972	0.474899	0.551756	0.437576	0.423405	0.442311	0.429188	0.444239	0.414748	0.497513	0.450027	0.472553	0.462004	0.509529	0.489682
	0.532965	0.453469	0.538904	0.434165	0.41674	0.44008	0.446446	0.447398	0.42302	0.491051	0.454549	0.460964	0.461474	0.489745	0.483762
	0.532164	0.461112	0.548706	0.430591	0.435068	0.457131	0.445961	0.459087	0.420196	0.48487	0.453975	0.473468	0.463291	0.49277	0.475714
	0.535657	0.475648	0.554108	0.452116	0.444085	0.451873	0.45556	0.4572	0.415543	0.493186	0.463389	0.512504	0.444899	0.525077	0.494683
	0.541115	0.454218	0.543348	0.438551	0.421641	0.446614	0.445475	0.46003	0.415026	0.499003	0.447463	0.479262	0.454965	0.50844	0.486751
	0.525178	0.45302	0.547835	0.448298	0.425757	0.458287	0.439812	0.456421	0.41781	0.49608	0.448913	0.475602	0.480397	0.507048	0.48928
	0.544026	0.455867	0.543827	0.426123	0.437714	0.441514	0.444504	0.453509	0.422026	0.496586	0.462815	0.492071	0.455344	0.52907	0.4806
	0.5318	0.476997	0.53886	0.434977	0.429972	0.448685	0.440352	0.453755	0.40727	0.492653	0.456472	0.458829	0.451786	0.505112	0.486061
	0.532528	0.496928	0.540995	0.437739	0.449672	0.440359	0.446985	0.448628	0.416577	0.494423	0.455662	0.49817	0.47313	0.505112	0.485256
	0.532237	0.490184	0.557593	0.454959	0.477801	0.453267	0.474436	0.467987	0.424929	0.498272	0.460015	0.561757	0.468286	0.550548	0.508019
	0.546427	0.501124	0.543827	0.46495	0.45663	0.450159	0.452864	0.463189	0.416219	0.500548	0.467674	0.49817	0.458447	0.523746	0.47945
	0.514263	0.474	0.539078	0.45301	0.416642	0.45255	0.445799	0.44223	0.415901	0.497542	0.448002	0.460811	0.464956	0.519209	0.488475
	0.541697	0.464559	0.550972	0.450654	0.43399	0.453665	0.457394	0.463271	0.427873	0.501194	0.46042	0.501677	0.480472	0.514974	0.48836
	0.539441	0.470253	0.550274	0.44773	0.429874	0.463267	0.453403	0.465444	0.430856	0.492372	0.467911	0.487496	0.473055	0.513522	0.490257
	0.508223	0.45257	0.545831	0.424174	0.439969	0.444223	0.447471	0.458964	0.415066	0.489084	0.45141	0.47301	0.454511	0.502692	0.491924
	0.531	0.475648	0.542084	0.433596	0.418798	0.443825	0.449358	0.452935	0.41077	0.499199	0.458294	0.508539	0.439752	0.520721	0.497959
	0.525106	0.487487	0.547268	0.450979	0.443693	0.449482	0.4465	0.458677	0.416895	0.492596	0.454177	0.516773	0.479488	0.515034	0.504972
	0.53835	0.474299	0.544088	0.439769	0.43399	0.44992	0.450383	0.456462	0.42135	0.492456	0.451714	0.505337	0.454889	0.517454	0.478646
	0.544753	0.477746	0.563126	0.455771	0.426933	0.455777	0.451731	0.459989	0.417174	0.497626	0.457754	0.494206	0.487209	0.52544	0.512445
	0.537113	0.497827	0.546659	0.464544	0.454768	0.456375	0.457718	0.457405	0.420753	0.502487	0.456573	0.532632	0.468892	0.531611	0.503708
	0.550429	0.489435	0.554195	0.469418	0.462903	0.453267	0.459497	0.451991	0.42302	0.508331	0.458901	0.5	0.475174	0.513764	0.497902
	0.542643	0.508917	0.54252	0.460401	0.477605	0.447251	0.462032	0.462532	0.422662	0.507235	0.459779	0.515401	0.464578	0.513038	0.496235
	0.525615	0.468455	0.537423	0.458614	0.43203	0.445618	0.447686	0.45798	0.405441	0.493833	0.459138	0.461421	0.450802	0.5085	0.483762
	0.547519	0.509066	0.557332	0.456665	0.43301	0.45992	0.465322	0.45236	0.421946	0.49181	0.461837	0.515706	0.463594	0.516486	0.501523
	0.514627	0.454218	0.547878	0.427504	0.395668	0.433705	0.460468	0.46729	0.418089	0.489393	0.452828	0.443275	0.449894	0.49519	0.471633
	0.531728	0.48389	0.548096	0.449111	0.419975	0.455737	0.458257	0.458103	0.420833	0.506982	0.463625	0.528515	0.455949	0.507774	0.497902
	0.528016	0.482841	0.546963	0.434652	0.433892	0.451554	0.449951	0.45195	0.415543	0.500295	0.457754	0.480024	0.454057	0.515095	0.481232
	0.54126	0.445976	0.533066	0.443018	0.458689	0.451912	0.451731	0.462409	0.411804	0.490602	0.454177	0.488411	0.445655	0.493557	0.487613
	0.518411	0.469804	0.530322	0.420031	0.431148	0.447131	0.443641	0.451499	0.41777	0.489843	0.450668	0.446325	0.430442	0.490532	0.470253
	0.529544	0.444328	0.544655	0.438145	0.433402	0.450199	0.45734	0.458841	0.429702	0.497935	0.453266	0.46874	0.471087	0.516184	0.494683
	0.526998	0.446576	0.545787	0.444074	0.427815	0.44988	0.450329	0.453427	0.415225	0.485769	0.454818	0.462336	0.449364	0.517212	0.483014
	0.53311	0.43174	0.540429	0.434571	0.413506	0.444661	0.451731	0.454452	0.414072	0.498272	0.459036	0.475145	0.452165	0.504991	0.477151
	0.504439	0.483441	0.542694	0.425717	0.422327	0.441514	0.451515	0.453263	0.405958	0.484252	0.452524	0.472858	0.458144	0.492286	0.50365
	0.533256	0.479694	0.553542	0.423361	0.442027	0.453785	0.465268	0.462614	0.417929	0.494928	0.45573	0.511741	0.474569	0.49398	0.501178
	0.551303	0.487487	0.541605	0.448379	0.441439	0.463108	0.463812	0.472171	0.423378	0.482875	0.461668	0.496645	0.475023	0.518362	0.497844
	0.530272	0.479844	0.553063	0.434814	0.419386	0.445538	0.449142	0.456995	0.417492	0.497598	0.462006	0.501982	0.453073	0.495916	0.506639
	0.503857	0.436086	0.537684	0.415563	0.421347	0.44259	0.441268	0.447316	0.419162	0.495462	0.451613	0.468435	0.444217	0.500756	0.483647
	0.540678	0.499026	0.545787	0.44513	0.458297	0.466056	0.450976	0.450269	0.425963	0.502037	0.455999	0.519061	0.484105	0.515942	0.511812
	0.542497	0.455867	0.547268	0.446592	0.463001	0.449163	0.456208	0.455478	0.433719	0.501616	0.448779	0.483074	0.476007	0.522415	0.49612
	0.553486	0.501723	0.562778	0.451629	0.465059	0.450438	0.475785	0.469505	0.445015	0.503863	0.453874	0.520433	0.464805	0.515034	0.497729
	0.541988	0.485089	0.550405	0.448461	0.460845	0.449004	0.465861	0.463763	0.432009	0.49875	0.460588	0.47179	0.479867	0.518906	0.505432
	0.547373	0.486438	0.551276	0.447161	0.432324	0.461155	0.454428	0.461056	0.425208	0.496614	0.455763	0.5276	0.451786	0.498518	0.492844
	0.531073	0.481343	0.53311	0.438957	0.424973	0.452072	0.45103	0.44711	0.421589	0.501194	0.446383	0.481092	0.450954	0.498034	0.480658
	0.569277	0.503222	0.558116	0.446592	0.465745	0.460279	0.464243	0.463024	0.432248	0.495828	0.463288	0.539189	0.472752	0.510255	0.512962
	0.515282	0.447625	0.531846	0.43782	0.428501	0.448606	0.455938	0.458431	0.422026	0.498328	0.454144	0.481549	0.465335	0.52181	0.478416
	0.520448	0.43204	0.538991	0.420843	0.43399	0.450199	0.446446	0.449325	0.421071	0.486949	0.451714	0.4724	0.475855	0.494525	0.469679
	0.531582	0.478046	0.551712	0.445049	0.439479	0.445777	0.45432	0.454329	0.418168	0.495125	0.456337	0.479109	0.46208	0.516305	0.498017
	0.553995	0.482392	0.559162	0.446755	0.444477	0.44992	0.478481	0.45273	0.423537	0.497766	0.452153	0.52821	0.477596	0.520237	0.493821
	0.53522	0.457815	0.545439	0.437332	0.470352	0.449323	0.450005	0.447808	0.413793	0.498722	0.452153	0.522568	0.452619	0.501603	0.494281
	0.543807	0.481642	0.565261	0.452035	0.424973	0.449163	0.449412	0.46647	0.424293	0.494535	0.449757	0.517536	0.458977	0.509831	0.496178
	0.529908	0.473101	0.565827	0.440825	0.397824	0.435219	0.45734	0.461794	0.429265	0.486275	0.45573	0.501372	0.451181	0.492165	0.484739
	0.531728	0.476248	0.539688	0.465113	0.43399	0.454183	0.458904	0.45638	0.422503	0.499003	0.447631	0.467673	0.47805	0.518362	0.498247
	0.530782	0.484939	0.548053	0.446917	0.426051	0.440159	0.445259	0.456134	0.434037	0.492737	0.466122	0.473163	0.462156	0.50124	0.476979
	0.550866	0.453169	0.546876	0.447405	0.439969	0.448884	0.472549	0.459169	0.429742	0.501363	0.457889	0.480329	0.472676	0.528889	0.499339
	0.540824	0.461861	0.542738	0.443749	0.432128	0.444064	0.447902	0.455437	0.408782	0.492821	0.462107	0.476365	0.455495	0.503116	0.484509
	0.528453	0.482542	0.548793	0.419706	0.424777	0.453347	0.459497	0.460071	0.4231	0.505886	0.45573	0.511436	0.472222	0.508198	0.502385
	0.532455	0.44178	0.545526	0.446917	0.436538	0.455657	0.453835	0.445552	0.425327	0.504341	0.449656	0.483837	0.464351	0.491016	0.476002
	0.548028	0.455267	0.548183	0.45439	0.448888	0.451713	0.461601	0.454698	0.430657	0.501475	0.456033	0.489021	0.472676	0.506988	0.509973
	0.527798	0.468455	0.530452	0.437332	0.440067	0.439283	0.445152	0.465444	0.418566	0.493383	0.453874	0.471485	0.451029	0.509347	0.48106
	0.529399	0.481193	0.545569	0.447892	0.434872	0.452908	0.457772	0.458062	0.424015	0.502768	0.465414	0.494968	0.478504	0.518059	0.485543
	0.549556	0.497078	0.552758	0.459345	0.461433	0.455498	0.472225	0.461056	0.445293	0.495996	0.468855	0.533547	0.484257	0.534031	0.51118
	0.513462	0.45287	0.532587	0.435708	0.454278	0.44012	0.437763	0.447357	0.413197	0.48886	0.452963	0.435041	0.446715	0.466029	0.469276
	0.526561	0.493181	0.547181	0.449192	0.440067	0.46	0.456531	0.449284	0.432844	0.506561	0.454245	0.485361	0.459809	0.52302	0.501408
	0.527507	0.478046	0.554631	0.452441	0.443889	0.453307	0.473843	0.445388	0.423498	0.498356	0.452929	0.512046	0.456403	0.515881	0.477726
	0.520739	0.457965	0.537684	0.441475	0.420465	0.439124	0.441322	0.451786	0.417532	0.500267	0.453975	0.459591	0.451938	0.510013	0.491062
	0.541333	0.488985	0.541431	0.463894	0.455552	0.455538	0.462356	0.459743	0.431412	0.501897	0.457045	0.481397	0.447094	0.53633	0.503822
	0.51208	0.425146	0.526401	0.433109	0.405273	0.437211	0.449089	0.448792	0.419878	0.496755	0.45519	0.455474	0.443385	0.474197	0.489165
	0.529472	0.471003	0.548358	0.440419	0.42958	0.446773	0.462518	0.463353	0.432884	0.490321	0.466021	0.497713	0.481078	0.506504	0.495488
	0.520885	0.44163	0.538076	0.428966	0.415858	0.433865	0.442455	0.463845	0.427674	0.494704	0.453064	0.44297	0.455646	0.520661	0.482554
	0.538932	0.447475	0.535114	0.447973	0.411546	0.446295	0.450275	0.452812	0.418168	0.492568	0.455966	0.476975	0.455192	0.487325	0.485026
	0.528817	0.459913	0.543086	0.453822	0.444085	0.451394	0.464189	0.44953	0.430617	0.496558	0.463794	0.502592	0.449516	0.50239	0.507041
	0.534711	0.47385	0.559467	0.453497	0.456728	0.456375	0.453511	0.465526	0.43014	0.492259	0.458294	0.449527	0.479867	0.523625	0.494166
	0.559744	0.503672	0.549665	0.455771	0.460845	0.457331	0.457448	0.47254	0.436623	0.498047	0.472668	0.552455	0.497729	0.523686	0.507041
	0.544899	0.478346	0.553542	0.440338	0.464373	0.452311	0.469259	0.464747	0.427793	0.499874	0.479484	0.500152	0.483197	0.509105	0.51049
	0.533692	0.469354	0.556199	0.43254	0.462511	0.454622	0.46063	0.456667	0.436463	0.501307	0.462681	0.517993	0.469724	0.507411	0.507271
	0.529326	0.472651	0.54936	0.444643	0.435166	0.460159	0.462841	0.455437	0.436782	0.505662	0.473377	0.485666	0.481229	0.516184	0.516411
	0.602605	0.487787	0.550492	0.444643	0.423503	0.454263	0.459605	0.470243	0.447282	0.505549	0.519503	0.586764	0.545489	0.624055	0.630741
	0.94062	0.796044	0.919753	0.71229	0.573949	0.737849	0.586668	0.648907	0.696814	0.682925	0.798387	0.885788	0.815546	0.999335	0.983388
	1.05953	0.884759	1.1588	0.909187	0.679898	1.01594	0.77311	0.860219	0.848984	0.778708	0.923944	0.925282	0.963896	1.015	1.04236
	0.872653	0.782856	1.01621	0.783283	0.588454	0.846972	0.785298	0.812682	0.736587	0.734821	0.854906	0.775084	0.826067	0.816565	0.902397
	0.747999	0.643788	0.900802	0.692795	0.54631	0.72753	0.740211	0.741479	0.658235	0.696328	0.78624	0.724306	0.764986	0.731502	0.781054
	0.693494	0.659823	0.837327	0.636748	0.500539	0.65996	0.689192	0.674296	0.613093	0.64182	0.718619	0.660262	0.715713	0.678141	0.739438
	0.683962	0.634947	0.78727	0.58135	0.512006	0.601474	0.656024	0.629548	0.584616	0.619988	0.646815	0.684965	0.668862	0.635429	0.700581
	0.630913	0.554024	0.727673	0.551214	0.461041	0.556454	0.631701	0.601001	0.563696	0.58689	0.613781	0.591796	0.635483	0.606691	0.650629
	0.644812	0.585344	0.715867	0.549996	0.484857	0.600478	0.646316	0.657028	0.589826	0.60195	0.60467	0.603995	0.644944	0.643475	0.654883
	0.888299	0.813128	1.02431	0.802209	0.642752	0.873068	0.729587	0.788647	0.741399	0.710713	0.763936	0.802989	0.8269	0.870652	0.886647
	0.781764	0.690694	0.922976	0.671513	0.525434	0.716773	0.690217	0.725647	0.665195	0.671743	0.704177	0.664684	0.742583	0.725634	0.761913
	0.714015	0.656526	0.838852	0.654943	0.527198	0.648367	0.658559	0.68619	0.645508	0.650024	0.669692	0.706008	0.727369	0.686853	0.725987
	0.662713	0.603027	0.782914	0.58265	0.50642	0.599124	0.638874	0.63045	0.588355	0.622236	0.627818	0.602775	0.673025	0.655696	0.676496
	0.69495	0.587142	0.780125	0.571115	0.490248	0.632869	0.652249	0.684508	0.637832	0.620494	0.648637	0.653095	0.675749	0.71795	0.735989
	0.923228	0.79994	1.06313	0.80619	0.651671	0.867888	0.736814	0.800418	0.779461	0.718215	0.765117	0.832113	0.809643	0.865993	0.876301
	0.749309	0.68425	0.939705	0.672326	0.523277	0.720398	0.705695	0.727411	0.683292	0.692085	0.726009	0.677341	0.751892	0.7361	0.751279
	0.685781	0.678406	0.86107	0.614491	0.514653	0.645618	0.663413	0.672655	0.634968	0.657526	0.673708	0.662397	0.688162	0.672696	0.716848
	0.66264	0.619961	0.810403	0.582325	0.516809	0.606255	0.649067	0.652516	0.595792	0.619848	0.642293	0.647911	0.665077	0.622179	0.681727
	0.654053	0.586393	0.76344	0.577614	0.496717	0.584143	0.636609	0.61995	0.580997	0.609761	0.608719	0.637694	0.669467	0.642326	0.652756
	0.870179	0.73685	0.959876	0.730241	0.561207	0.803347	0.674954	0.740659	0.698166	0.666573	0.726481	0.793535	0.821602	0.888499	0.890901
	0.807306	0.700884	1.00078	0.74072	0.56797	0.81255	0.706828	0.771913	0.696098	0.680397	0.732184	0.732083	0.789585	0.777361	0.800253
	0.730898	0.686648	0.912564	0.678255	0.536999	0.712669	0.701111	0.715024	0.642008	0.660448	0.699386	0.720037	0.744777	0.722064	0.750819
	0.664969	0.583845	0.824649	0.601901	0.503871	0.648566	0.651925	0.668923	0.584417	0.630412	0.647827	0.590119	0.66432	0.640329	0.688165
	0.659147	0.609021	0.786791	0.572496	0.492208	0.621315	0.634128	0.623231	0.57348	0.606698	0.629235	0.648063	0.663866	0.61982	0.681612
	0.795808	0.683201	0.878627	0.672407	0.554837	0.741594	0.651278	0.713383	0.650758	0.636959	0.671683	0.782708	0.737587	0.813782	0.799276
	0.885461	0.763974	1.0352	0.802534	0.605998	0.862948	0.715079	0.788934	0.72903	0.694754	0.755433	0.756633	0.828414	0.848388	0.876703
	0.960268	0.853289	1.0819	0.835594	0.590709	0.880518	0.748247	0.824782	0.773933	0.736844	0.836651	0.894175	0.930593	0.967693	0.982468
	1.08456	0.946651	1.24475	0.898708	0.669901	0.961514	0.822889	0.895246	0.823251	0.786379	0.913619	1.01022	1.04345	1.0576	1.09668
	1.17843	1.03042	1.36591	0.980668	0.67637	1.11267	0.876443	0.983143	0.889273	0.847827	0.986165	1.05215	1.13753	1.06788	1.18957
	0.9837	0.942754	1.22606	0.869548	0.628933	0.927689	0.870348	0.916369	0.807064	0.819758	0.936834	0.962184	1.07342	0.939137	1.03719
	0.864503	0.794096	1.08839	0.739258	0.541703	0.792908	0.783141	0.82794	0.717814	0.753674	0.834762	0.87054	0.940811	0.797568	0.921423
	0.815893	0.740147	1.00231	0.684022	0.54974	0.719203	0.742477	0.766663	0.674661	0.713832	0.776252	0.751144	0.862625	0.745538	0.837041
	0.753311	0.716319	0.915396	0.639834	0.52661	0.676972	0.705911	0.716747	0.635644	0.667079	0.720408	0.785148	0.801014	0.720673	0.78617
	0.694659	0.622808	0.842511	0.600439	0.496325	0.618167	0.65295	0.661827	0.602832	0.633812	0.667162	0.668192	0.751968	0.650191	0.723401
	0.642628	0.586842	0.799469	0.559175	0.470254	0.592709	0.625067	0.62561	0.56115	0.59973	0.612667	0.599878	0.69785	0.624055	0.645399
	0.630112	0.601678	0.760608	0.560393	0.470646	0.578207	0.611854	0.593946	0.545758	0.588239	0.597348	0.615432	0.658644	0.612378	0.669656
	0.6256	0.542035	0.740525	0.537649	0.496325	0.560876	0.588016	0.587958	0.542099	0.572392	0.576495	0.619854	0.644566	0.606207	0.636949
	0.746835	0.632549	0.833885	0.664365	0.563266	0.70996	0.635099	0.657397	0.622082	0.609424	0.614827	0.691979	0.750303	0.758485	0.753521
	1.09889	0.973325	1.22484	0.94249	0.684309	1.03745	0.742692	0.821869	0.776598	0.733275	0.801053	0.966148	0.992507	1.02063	1.02098
	1.16271	1.0556	1.33724	1.01478	0.699108	1.04578	0.842951	0.938231	0.872569	0.815909	0.932177	1.1011	1.12421	1.05778	1.09473
	1.31415	1.13322	1.41627	1.01486	0.720866	1.09562	0.831356	0.954268	0.869228	0.838386	1.00172	1.22293	1.24584	1.18041	1.2159
	1.23279	1.13352	1.40054	1.0169	0.729393	1.10637	0.88971	0.987531	0.86366	0.868478	1.00567	1.16224	1.22699	1.09135	1.16244
	1.4567	1.14221	1.42089	0.936561	0.632265	0.956255	0.838798	0.933473	0.839478	0.845944	1.02925	1.26167	1.30767	1.27842	1.35029
	1.54694	1.31036	1.73547	1.14377	0.752328	1.23669	0.90686	1.10209	0.981864	0.912843	1.12255	1.35468	1.40743	1.34315	1.42657
	1.56862	1.32909	1.82434	1.17903	0.795746	1.36239	0.989268	1.20208	1.05536	0.925571	1.17857	1.34416	1.41447	1.42919	1.51946
	1.40969	1.2107	1.88499	1.10519	0.685093	1.21319	0.987272	1.1874	0.976654	0.858813	1.07572	1.21317	1.30018	1.20485	1.33799
	1.2079	1.07373	1.68842	0.98676	0.672155	1.10582	0.944774	1.07379	0.846677	0.804894	0.970306	1.09302	1.15319	1.02323	1.15692
	1.03107	0.922524	1.47817	0.85249	0.615799	0.95988	0.873423	0.978836	0.763393	0.748701	0.8846	0.94297	1.03429	0.897695	1.01931
	0.889245	0.794695	1.32482	0.731947	0.542978	0.82741	0.792201	0.874492	0.697252	0.688067	0.779424	0.806343	0.948683	0.795027	0.892855
	0.826226	0.701783	1.16659	0.666152	0.493776	0.734502	0.72263	0.780936	0.637673	0.648703	0.732386	0.760598	0.871405	0.72158	0.839685
	0.77587	0.698037	1.08979	0.649825	0.516711	0.710956	0.705318	0.753538	0.62757	0.640668	0.688487	0.74108	0.822964	0.719281	0.777203
	0.731698	0.680953	0.99695	0.596296	0.483289	0.650916	0.65953	0.690579	0.595553	0.614622	0.645161	0.65706	0.77036	0.640874	0.723343
	0.679013	0.630451	0.933389	0.580781	0.489464	0.629124	0.640654	0.668512	0.569184	0.592172	0.617391	0.681763	0.737587	0.640995	0.708915
	0.644011	0.562715	0.894572	0.551214	0.497795	0.599641	0.617733	0.618678	0.551684	0.579866	0.596336	0.633425	0.688465	0.607417	0.664597
	0.654053	0.560767	0.84238	0.54561	0.513966	0.576056	0.594974	0.617571	0.542576	0.567222	0.561513	0.650503	0.668029	0.638877	0.63396
	0.626546	0.574254	0.806221	0.544066	0.484661	0.573745	0.581545	0.589639	0.524042	0.557669	0.553314	0.596523	0.673857	0.613225	0.637581
	0.641246	0.585644	0.784046	0.529608	0.488778	0.551116	0.574048	0.577622	0.517321	0.552921	0.549602	0.63556	0.63412	0.582854	0.627235
	0.639281	0.534992	0.752984	0.532288	0.481035	0.549243	0.569356	0.557647	0.504435	0.544379	0.554191	0.599726	0.611338	0.596225	0.606254
	0.644157	0.572906	0.72092	0.521566	0.478193	0.531155	0.559648	0.543456	0.502128	0.536709	0.53047	0.556115	0.627309	0.596406	0.619877
	0.621671	0.572606	0.730592	0.540086	0.466627	0.541753	0.565149	0.546286	0.513622	0.545194	0.532326	0.60735	0.621783	0.607357	0.587688
	0.632586	0.513113	0.70528	0.529202	0.478389	0.520637	0.548377	0.542595	0.497952	0.541626	0.52173	0.543458	0.577203	0.582612	0.562798
	0.596274	0.522254	0.678531	0.490293	0.463001	0.51996	0.531928	0.529716	0.487889	0.532157	0.521764	0.545593	0.564714	0.555569	0.559867
	0.594964	0.531995	0.666943	0.515718	0.490934	0.532072	0.557437	0.52947	0.505389	0.530808	0.52696	0.589357	0.559113	0.561679	0.574754
	0.570732	0.523153	0.664851	0.499553	0.497697	0.51741	0.548269	0.530659	0.501491	0.535107	0.509718	0.599421	0.57092	0.586303	0.585618
	0.619924	0.559868	0.663762	0.537893	0.482505	0.530797	0.558732	0.538739	0.528855	0.538114	0.525881	0.599421	0.601574	0.586726	0.581767
	0.72595	0.554174	0.72898	0.572496	0.521611	0.618924	0.613472	0.641196	0.61719	0.58113	0.603691	0.665447	0.672116	0.770706	0.727827
	1.09351	0.861082	1.12769	0.845991	0.702931	0.993426	0.758656	0.809114	0.758462	0.691551	0.782022	0.895852	0.923479	1.03636	0.996034
	1.1475	0.967631	1.303	0.927626	0.723317	1.08984	0.858052	0.910463	0.835063	0.764407	0.871103	1.02699	1.03315	1.09341	1.08105
	1.28075	1.11254	1.43112	1.02429	0.746251	1.19805	0.897422	0.999385	0.884978	0.828355	0.99892	1.08249	1.18302	1.1426	1.16514
	1.25957	1.06983	1.41339	1.01032	0.678526	1.08147	0.934149	1.03773	0.922563	0.851114	1.02561	1.1961	1.22374	1.19844	1.24338
	1.35082	1.1623	1.57702	1.12769	0.739292	1.24311	0.955237	1.08687	0.92654	0.865331	1.0491	1.22781	1.23812	1.16692	1.21946
	1.49825	1.26255	1.80831	1.23345	0.763697	1.43044	1.0165	1.16743	0.981148	0.913489	1.10244	1.26075	1.33023	1.32718	1.36265
	1.36094	1.20081	1.73909	1.16238	0.71479	1.32753	1.01542	1.12703	0.904029	0.893035	1.05119	1.14318	1.23486	1.15415	1.22504
	1.32783	1.16005	1.64952	1.06263	0.672841	1.21673	0.964783	1.03946	0.920177	0.884072	1.04937	1.22354	1.24947	1.20497	1.28011
	1.48646	1.30136	1.82652	1.03631	0.646281	1.13689	1.01391	1.18912	1.01575	0.924588	1.10254	1.23833	1.29549	1.25168	1.35437
	1.51688	1.35906	1.97225	1.16238	0.775066	1.39514	1.14065	1.27382	1.02601	0.939901	1.11236	1.33898	1.34961	1.32047	1.40248
	1.4877	1.22119	1.90281	1.12176	0.695384	1.28996	1.16212	1.31619	1.03762	0.937653	1.11263	1.2978	1.31926	1.27921	1.38995
	1.33627	1.17803	1.74122	0.99407	0.623836	1.12793	1.12286	1.20114	0.934017	0.879267	1.03438	1.17978	1.24644	1.12554	1.25389
	1.14496	1.0478	1.56025	0.861019	0.576105	0.999442	1.03586	1.07186	0.839717	0.80953	0.950668	1.06176	1.14684	0.99631	1.1041
	0.995634	0.881463	1.39322	0.7685	0.542193	0.874024	0.937439	0.946024	0.750348	0.751763	0.850857	0.927112	1.04435	0.881965	0.980169
	0.913914	0.800839	1.28653	0.729267	0.543566	0.818327	0.87682	0.865756	0.715587	0.701526	0.774194	0.883196	0.974644	0.817654	0.904811
	0.859918	0.817473	1.17526	0.679799	0.519651	0.753506	0.805253	0.806448	0.667422	0.674356	0.724119	0.856664	0.914245	0.747353	0.848882
	0.795517	0.738199	1.06792	0.629356	0.499363	0.68259	0.756661	0.75161	0.642405	0.651429	0.694189	0.740927	0.841356	0.712445	0.776686
	0.742614	0.654878	1.00253	0.596296	0.491032	0.661434	0.705641	0.721053	0.608122	0.621955	0.65191	0.712565	0.772177	0.67554	0.748405
	0.694731	0.639443	0.956652	0.564942	0.46898	0.619721	0.652303	0.666626	0.58036	0.596218	0.626738	0.681153	0.721314	0.66828	0.682761
	0.687382	0.573955	0.898798	0.570303	0.457611	0.592191	0.628519	0.638325	0.569463	0.584502	0.605682	0.617719	0.713215	0.647226	0.676266
	0.679159	0.62116	0.871264	0.565023	0.488092	0.581594	0.628465	0.633075	0.560395	0.584333	0.58547	0.635712	0.72578	0.627745	0.657987
	0.645903	0.57905	0.813758	0.526683	0.452122	0.562191	0.601877	0.59288	0.534344	0.555365	0.562795	0.608112	0.680518	0.604755	0.623383
	0.63979	0.537839	0.784831	0.540086	0.440263	0.54506	0.580358	0.573315	0.537446	0.553314	0.55878	0.587832	0.656903	0.608627	0.62551
	0.624509	0.587142	0.750545	0.51125	0.483583	0.532829	0.581221	0.558673	0.521974	0.554719	0.538433	0.613754	0.633515	0.600641	0.596712
2.5	0.630112	0.587892	0.762656	0.534075	0.478977	0.534183	0.59341	0.564374	0.529969	0.544435	0.544507	0.632967	0.641538	0.597132	0.618095
	0.61665	0.517908	0.722183	0.523759	0.460943	0.53251	0.576691	0.555022	0.499861	0.541064	0.53462	0.546661	0.608462	0.571964	0.595505
	0.603115	0.541735	0.708504	0.530014	0.447711	0.505458	0.551073	0.544071	0.500537	0.539518	0.51974	0.562824	0.592492	0.576078	0.598034
	0.615849	0.510265	0.693997	0.514337	0.439283	0.511195	0.547999	0.539231	0.504633	0.537074	0.524261	0.598353	0.612322	0.577167	0.602748
	0.592054	0.519856	0.686765	0.490781	0.426541	0.512191	0.54719	0.519708	0.495526	0.529797	0.507322	0.57487	0.585301	0.57632	0.561304
	0.590016	0.455867	0.671038	0.474373	0.426933	0.496414	0.529447	0.517903	0.481923	0.528476	0.508942	0.543611	0.564411	0.542985	0.567339
	0.592126	0.513262	0.649996	0.489643	0.413702	0.496693	0.530417	0.512858	0.483117	0.514962	0.506782	0.534004	0.56865	0.569484	0.575272
	0.608208	0.479095	0.641675	0.509788	0.477017	0.501394	0.534786	0.522374	0.48077	0.530387	0.50712	0.586459	0.574932	0.571117	0.557797
	0.567749	0.493032	0.630609	0.484364	0.447515	0.493745	0.532251	0.497067	0.486298	0.522604	0.497874	0.552303	0.54337	0.555388	0.567799
	0.613011	0.533943	0.653612	0.495492	0.461139	0.514104	0.538993	0.517288	0.481884	0.522969	0.516804	0.613144	0.570845	0.548067	0.560729
	0.609664	0.526899	0.634573	0.488019	0.46849	0.486693	0.514454	0.517124	0.475997	0.526875	0.501012	0.559469	0.565925	0.573477	0.549578
	0.595037	0.517608	0.642285	0.4868	0.45614	0.508327	0.522382	0.517657	0.47544	0.525498	0.506276	0.595303	0.553588	0.578498	0.562051
	0.600131	0.505919	0.614838	0.48079	0.456238	0.492191	0.493906	0.512735	0.471145	0.510944	0.498853	0.551388	0.549198	0.56779	0.545899
	0.594309	0.490334	0.638625	0.478678	0.484563	0.489124	0.505932	0.494401	0.464463	0.511506	0.500304	0.532174	0.549122	0.544195	0.536472
	0.574807	0.493931	0.618498	0.492243	0.477997	0.492829	0.50151	0.508593	0.472736	0.515776	0.498009	0.552608	0.535271	0.56053	0.54084
	0.598676	0.500075	0.618803	0.483795	0.480937	0.49243	0.503829	0.505394	0.475361	0.51867	0.505399	0.533699	0.545489	0.555327	0.552164
	0.567603	0.503372	0.623464	0.472261	0.458787	0.502191	0.513483	0.497108	0.471384	0.517238	0.497942	0.584477	0.554345	0.560651	0.546186
	0.563892	0.465458	0.614969	0.487613	0.425855	0.480398	0.493312	0.507362	0.4546	0.511506	0.488089	0.518756	0.544051	0.548067	0.540151
	0.575171	0.493481	0.610438	0.471936	0.457807	0.498884	0.506202	0.499364	0.469673	0.519036	0.492172	0.577158	0.525204	0.551032	0.552452
	0.591908	0.531545	0.611919	0.495573	0.499951	0.485219	0.5096	0.510069	0.475878	0.51808	0.495411	0.52577	0.543294	0.549277	0.550555
	0.575753	0.504571	0.593143	0.460564	0.4532	0.489641	0.509977	0.512448	0.472179	0.507769	0.484917	0.52272	0.527324	0.561498	0.549175
	0.569422	0.460662	0.610351	0.467306	0.46996	0.480518	0.511649	0.494401	0.466173	0.510663	0.491159	0.532784	0.528005	0.531369	0.537909
	0.583612	0.486588	0.601159	0.484851	0.461531	0.494303	0.500647	0.50404	0.464861	0.521143	0.488561	0.539951	0.550711	0.560893	0.558947
	0.594091	0.483591	0.591313	0.481114	0.49015	0.491394	0.527182	0.504532	0.470628	0.507656	0.495107	0.544678	0.536028	0.547341	0.565902
	0.566875	0.448824	0.591836	0.467468	0.437224	0.486135	0.485438	0.495632	0.472179	0.501391	0.485288	0.52211	0.513246	0.545224	0.532965
	0.572042	0.474749	0.598719	0.482414	0.499167	0.494223	0.520494	0.504368	0.474685	0.51336	0.497233	0.555657	0.520512	0.540384	0.554463
	0.574007	0.487787	0.587087	0.503615	0.47437	0.494542	0.513267	0.510397	0.481406	0.510241	0.490991	0.541019	0.522404	0.551758	0.538943
	0.581502	0.496478	0.59201	0.468037	0.469176	0.486773	0.503667	0.500964	0.482202	0.507685	0.491396	0.516468	0.513018	0.533063	0.541415
	0.62218	0.497827	0.589353	0.495817	0.482897	0.501235	0.517366	0.510931	0.496679	0.523166	0.524497	0.600793	0.569028	0.610624	0.613554
	1.02823	0.723513	0.863205	0.646333	0.535725	0.691355	0.59287	0.645421	0.713678	0.656374	0.775678	0.845532	0.839161	1.09946	1.05857
	1.3982	1.1016	1.30017	0.965884	0.710379	1.03339	0.742207	0.882737	0.915523	0.81161	1.01242	1.19335	1.18037	1.40632	1.38438
	1.46012	1.23692	1.60565	1.08748	0.751446	1.15092	0.851526	0.985604	0.956608	0.865163	1.0631	1.34065	1.30381	1.42065	1.49233
	1.52132	1.3129	1.8331	1.11486	0.718024	1.15406	0.906159	1.05972	0.987551	0.895901	1.14341	1.41186	1.3848	1.50529	1.63919
	1.3955	1.1596	1.72619	1.14857	0.73743	1.30291	0.976	1.13277	1.02374	0.908769	1.14283	1.35605	1.34688	1.40105	1.55297
	1.51172	1.35816	1.89701	1.29218	0.797903	1.45741	1.01375	1.18404	1.0628	0.930263	1.19605	1.49253	1.4088	1.49773	1.70299
	1.33481	1.22943	1.71848	1.15352	0.727531	1.30542	0.999353	1.1986	1.07533	0.946869	1.20559	1.35209	1.38768	1.44806	1.67494
	1.44564	1.16409	1.59288	1.04541	0.681564	1.12259	0.966616	1.10205	0.967148	0.891827	1.11888	1.36871	1.36202	1.37891	1.60959
	1.60275	1.30511	1.79433	1.15799	0.716554	1.2508	1.013	1.21911	1.06053	0.89812	1.1514	1.40378	1.44777	1.56973	1.76513
	1.67145	1.35801	1.96057	1.22289	0.736058	1.36239	1.02691	1.20356	1.04733	0.924391	1.15957	1.39021	1.44528	1.49452	1.70938
	1.523	1.24846	1.88947	1.20754	0.759777	1.38203	1.10759	1.27657	1.00791	0.864179	1.06182	1.28103	1.34908	1.29264	1.53716
	1.3581	1.15615	1.74131	1.11421	0.690679	1.21402	1.10975	1.30146	1.11335	0.896744	1.10302	1.3373	1.37405	1.36245	1.57809
	1.50815	1.2113	1.76109	1.09333	0.704205	1.28932	1.10128	1.3093	1.08046	0.88927	1.11358	1.37969	1.44407	1.44994	1.66259
	1.51172	1.17638	1.73164	1.12404	0.707929	1.27625	1.12647	1.29347	1.0146	0.863168	1.07936	1.35346	1.41205	1.43366	1.66701
	1.40627	1.09936	1.58251	0.987003	0.630893	1.08072	1.05032	1.20889	1.04101	0.877413	1.17084	1.35133	1.40599	1.57674	1.78502
	1.57721	1.17743	1.64176	0.978881	0.601686	1.01809	1.03328	1.24343	1.10949	0.917367	1.21595	1.47926	1.48418	1.64239	1.85883
	1.62982	1.31485	1.83589	1.14483	0.705773	1.26104	1.09497	1.31012	1.07354	0.870754	1.16804	1.43092	1.49114	1.5765	1.81698
	1.47475	1.26944	1.86521	1.16059	0.703911	1.37745	1.05603	1.21591	0.965995	0.824478	1.07096	1.30528	1.3739	1.37292	1.66247
	1.35148	1.20815	1.9692	1.23329	0.755366	1.41701	1.08737	1.20696	0.947938	0.804585	0.996423	1.16895	1.29186	1.21036	1.46313
	1.34034	1.22014	1.97822	1.11746	0.69656	1.26518	1.11698	1.2643	1.07453	0.866708	1.11263	1.27783	1.30662	1.38919	1.61752
	1.54199	1.20635	1.92598	1.03282	0.618348	1.14454	1.06423	1.16398	1.00636	0.862999	1.10116	1.32769	1.41432	1.3941	1.62034
	1.53697	1.28143	1.99203	1.10389	0.661472	1.18884	0.975569	1.07571	0.924472	0.812734	1.03864	1.27432	1.40441	1.27273	1.49008
	1.32666	1.22763	1.84674	1.17472	0.777222	1.41908	0.914626	0.980518	0.856222	0.768987	0.953266	1.19289	1.30086	1.12402	1.35224
	1.18986	1.13187	1.69273	1.08561	0.734784	1.30785	0.879732	0.905951	0.771865	0.718412	0.874713	1.04041	1.26325	1.0222	1.1894
	0.998472	0.940507	1.50671	0.934368	0.669411	1.16458	0.967803	1.01624	0.782325	0.688854	0.803887	0.914151	1.16773	0.895214	1.03184
	0.945641	0.832759	1.49146	0.972626	0.728707	1.30315	1.10155	1.24909	1.02537	0.7995	0.900121	0.894328	1.21443	1.00859	1.14186
	1.29763	1.08182	1.7109	1.18601	0.772616	1.3653	1.17388	1.32451	1.08102	0.899694	1.08139	1.17261	1.55117	1.41467	1.49692
	1.42905	1.17788	1.82992	1.08302	0.678526	1.20797	1.10954	1.22616	1.04618	0.885617	1.13598	1.24276	1.7083	1.41194	1.51911
	1.50713	1.21594	1.8588	1.02161	0.595021	1.08582	1.03522	1.15102	0.986915	0.853193	1.08982	1.25557	1.79519	1.3941	1.51095
	1.32841	1.14956	1.71944	0.926489	0.595511	0.992988	0.944235	1.05955	0.902557	0.807788	1.01971	1.24611	1.76756	1.24127	1.3838
	1.18149	1.04196	1.53786	0.819186	0.570028	0.907131	0.890141	0.976252	0.840075	0.768003	0.953098	1.15797	1.68695	1.10067	1.27206
	1.05749	0.911434	1.42319	0.783527	0.546212	0.827689	0.834052	0.905869	0.778785	0.723947	0.889391	1.05581	1.61671	1.01319	1.1149
	0.933416	0.8422	1.30287	0.724637	0.520239	0.760956	0.790098	0.848653	0.718649	0.680397	0.805102	0.912016	1.49001	0.921774	1.0388
	0.900597	0.772966	1.21212	0.680286	0.495933	0.732948	0.744903	0.785038	0.682019	0.648169	0.757828	0.859866	1.39298	0.862545	0.938955
	0.840707	0.778361	1.13553	0.638047	0.531804	0.685777	0.721443	0.742833	0.648729	0.638223	0.717708	0.802379	1.27543	0.801682	0.87107
	0.789405	0.711524	1.07776	0.6283	0.516711	0.665259	0.703214	0.719659	0.633496	0.606333	0.694392	0.790027	1.23675	0.776454	0.83957
	0.753602	0.67316	1.01268	0.607587	0.497893	0.634422	0.660339	0.685206	0.612178	0.592706	0.65687	0.735285	1.15229	0.739488	0.803242
	0.732281	0.667016	0.955955	0.600195	0.504165	0.609841	0.640438	0.651368	0.589707	0.581861	0.633351	0.733303	1.09015	0.71426	0.779675
	0.737884	0.679455	0.930339	0.604338	0.530138	0.600398	0.647665	0.654321	0.579247	0.58009	0.623161	0.754651	1.03118	0.717345	0.745818
	0.694659	0.624157	0.872353	0.545203	0.489366	0.581713	0.612663	0.613264	0.564332	0.565087	0.591072	0.671699	0.94997	0.661202	0.715583
	0.680978	0.536191	0.844428	0.545935	0.469568	0.56741	0.594003	0.59247	0.5594	0.563879	0.57474	0.631595	0.922116	0.645472	0.687417
	0.657037	0.554024	0.811536	0.521891	0.461335	0.555976	0.573778	0.583733	0.530684	0.551516	0.555271	0.649131	0.847866	0.641297	0.67069
	0.673847	0.575753	0.798423	0.545041	0.485249	0.558167	0.584241	0.585374	0.537486	0.551207	0.564179	0.640287	0.819634	0.650977	0.647008
	0.664678	0.616065	0.784743	0.526846	0.497599	0.538088	0.581922	0.590583	0.528815	0.544379	0.554899	0.62702	0.794656	0.62224	0.658562
	0.659147	0.585793	0.772197	0.560474	0.502009	0.551116	0.579981	0.568763	0.535378	0.543733	0.551593	0.637084	0.798289	0.642326	0.649825
	0.647868	0.581597	0.739435	0.528714	0.468	0.54012	0.555657	0.552849	0.51577	0.540698	0.531414	0.590424	0.742734	0.638454	0.639478
	0.628147	0.565413	0.71835	0.505889	0.487602	0.513307	0.548269	0.564948	0.518594	0.537158	0.537421	0.572126	0.735998	0.601851	0.589182
	0.648814	0.566162	0.703494	0.498741	0.498481	0.526295	0.54293	0.556376	0.508491	0.532859	0.519402	0.610247	0.695731	0.627201	0.604702
	0.620725	0.519107	0.703233	0.497766	0.456924	0.520757	0.54115	0.546532	0.494094	0.531483	0.533068	0.57853	0.693006	0.599492	0.593033
	0.633168	0.55807	0.693561	0.516449	0.485445	0.518725	0.550804	0.531685	0.506543	0.527633	0.529829	0.633425	0.672192	0.596467	0.615049
	0.652962	0.508167	0.681711	0.486638	0.483877	0.50255	0.541204	0.546532	0.489361	0.530022	0.50793	0.576243	0.655995	0.582975	0.593033
	0.623417	0.514461	0.658099	0.503046	0.468196	0.509681	0.513267	0.527583	0.49127	0.518052	0.513733	0.562214	0.634272	0.590538	0.579353
	0.62953	0.559718	0.677006	0.491918	0.499461	0.509084	0.543685	0.532136	0.495526	0.525245	0.514543	0.567856	0.642144	0.575534	0.599586
	0.632368	0.513562	0.669426	0.499878	0.47633	0.520478	0.52826	0.522005	0.479577	0.525358	0.508874	0.572126	0.639646	0.578075	0.586883
	0.61403	0.49498	0.654091	0.487856	0.46898	0.503825	0.519038	0.513433	0.484031	0.523503	0.513396	0.561757	0.589616	0.578559	0.582457
	0.615049	0.509666	0.650301	0.487613	0.473684	0.509163	0.524377	0.534145	0.483236	0.526734	0.496761	0.554132	0.596579	0.590477	0.574812
	0.603624	0.540986	0.646641	0.484526	0.488778	0.501155	0.52346	0.52061	0.487213	0.514905	0.518559	0.588594	0.602558	0.579829	0.575272
	0.599185	0.508767	0.639017	0.478759	0.458591	0.491992	0.512512	0.519216	0.489082	0.521003	0.514982	0.546661	0.581214	0.571299	0.546474
	0.634478	0.490634	0.63514	0.495492	0.463883	0.503665	0.514885	0.510151	0.48423	0.518221	0.514442	0.535377	0.601045	0.574324	0.545094
	0.612575	0.5263	0.632134	0.489237	0.478781	0.503267	0.512512	0.514704	0.491548	0.526172	0.5165	0.568618	0.570769	0.570149	0.570041
	0.61483	0.480593	0.629433	0.478921	0.507694	0.515618	0.527505	0.507444	0.490474	0.517209	0.512147	0.576395	0.588102	0.57263	0.55843
	0.592563	0.502323	0.608826	0.467306	0.482701	0.484263	0.494337	0.507567	0.483276	0.511534	0.488055	0.538731	0.544202	0.547946	0.550785
	0.617887	0.470853	0.616668	0.470067	0.468392	0.493227	0.492557	0.506173	0.472577	0.511506	0.494095	0.544068	0.551393	0.546615	0.5509
	0.593218	0.450472	0.610395	0.460807	0.470548	0.504582	0.502049	0.494771	0.460208	0.513753	0.488527	0.530955	0.540872	0.553936	0.552222
	0.582812	0.468605	0.602074	0.473235	0.471528	0.488645	0.494283	0.506706	0.461958	0.51617	0.500776	0.564806	0.528308	0.544982	0.543714
	0.595183	0.479694	0.622767	0.48079	0.467412	0.486494	0.517258	0.494278	0.467327	0.507881	0.490822	0.556572	0.523009	0.543167	0.551359
	0.603551	0.482092	0.61131	0.463244	0.458003	0.486414	0.507335	0.504327	0.466929	0.507909	0.492644	0.508539	0.539207	0.539355	0.54975
	0.61272	0.521205	0.614098	0.472992	0.435166	0.485498	0.518013	0.507567	0.473213	0.512011	0.5	0.563129	0.546246	0.545829	0.555326
	0.589798	0.447775	0.584604	0.450004	0.420073	0.47992	0.495739	0.490136	0.45798	0.499003	0.484276	0.503355	0.51756	0.533487	0.529861
	0.584777	0.502023	0.601028	0.476809	0.423797	0.485339	0.494014	0.50039	0.465736	0.500042	0.50027	0.52455	0.531487	0.540989	0.541818
	0.601004	0.503821	0.609044	0.484364	0.435362	0.486733	0.509492	0.492679	0.476276	0.505409	0.507153	0.565569	0.538904	0.546192	0.557108
	0.603333	0.487936	0.603381	0.454147	0.420171	0.486534	0.506094	0.507075	0.475997	0.506673	0.494804	0.550778	0.533606	0.540928	0.55113
	0.600204	0.506819	0.589483	0.478434	0.459963	0.477649	0.497843	0.5008	0.462634	0.498075	0.491699	0.574565	0.533152	0.539295	0.553831
	0.617887	0.54743	0.614969	0.507189	0.478585	0.480319	0.510732	0.522866	0.472935	0.515158	0.505365	0.57548	0.552225	0.555267	0.545611
	0.594091	0.496478	0.603424	0.47884	0.448398	0.481315	0.508144	0.494278	0.470071	0.51159	0.496457	0.570753	0.531562	0.534092	0.543025
	0.584267	0.511614	0.598893	0.455934	0.425169	0.481753	0.48134	0.491202	0.465298	0.502824	0.478911	0.535529	0.522555	0.537661	0.5267
	0.618032	0.51611	0.60826	0.473235	0.474076	0.476853	0.511865	0.5097	0.482122	0.514119	0.493623	0.539036	0.550939	0.557081	0.563775
	0.592126	0.479095	0.603468	0.474373	0.463687	0.483386	0.485546	0.506378	0.47373	0.513388	0.49369	0.546356	0.53406	0.547765	0.547796
	0.606316	0.520456	0.609611	0.487694	0.417034	0.484462	0.500108	0.514663	0.47735	0.517687	0.513058	0.58219	0.540115	0.552363	0.551819
	0.599985	0.523453	0.605123	0.495898	0.442321	0.487849	0.509869	0.510151	0.484747	0.515186	0.510764	0.494358	0.545413	0.557626	0.554923
	0.596711	0.478795	0.594058	0.465113	0.440459	0.483267	0.501942	0.503671	0.479696	0.512152	0.514476	0.535224	0.534893	0.566459	0.541243
	0.617668	0.527649	0.601769	0.479571	0.459277	0.483426	0.501672	0.517247	0.475958	0.516114	0.513598	0.557487	0.553134	0.583459	0.578146
	1.00044	0.740896	0.840768	0.621233	0.530432	0.613466	0.566983	0.63935	0.705962	0.662499	0.77146	0.939006	0.898426	1.12808	1.12841
	1.39274	1.1076	1.27324	0.965478	0.688817	1.0212	0.7668	0.970797	0.950205	0.814953	1.03955	1.24245	1.20504	1.44643	1.4322
	1.59402	1.33508	1.54971	1.11429	0.722435	1.15625	0.925467	1.12604	0.997256	0.882133	1.10703	1.44373	1.38087	1.56888	1.62505
	1.55756	1.30826	1.56631	1.15092	0.763011	1.20135	1.02195	1.21603	1.01774	0.93001	1.17806	1.42742	1.39873	1.55962	1.70478
	1.43938	1.16739	1.45247	1.05995	0.685779	1.04064	0.981663	1.1326	0.918904	0.887556	1.11739	1.30451	1.33606	1.36112	1.54647
	1.23119	1.06609	1.32526	0.889936	0.600804	0.918406	0.92153	1.02531	0.823092	0.819561	1.01424	1.19457	1.19021	1.14187	1.35293
	1.05771	0.929267	1.17866	0.804484	0.544448	0.808725	0.862151	0.933965	0.763035	0.759743	0.91868	0.980177	1.06873	1.03031	1.18342
	0.942075	0.79994	1.0677	0.729673	0.526806	0.736574	0.789882	0.84168	0.688899	0.708971	0.839958	0.84416	0.95383	0.899933	1.07415
	0.85839	0.775513	1.01133	0.674356	0.517593	0.696295	0.751645	0.783438	0.654218	0.673991	0.778209	0.850107	0.884499	0.843306	0.953153
	0.802649	0.696538	0.943191	0.652912	0.504557	0.664303	0.728724	0.749518	0.623633	0.645697	0.71926	0.765782	0.843249	0.784439	0.895269
	0.775069	0.669864	0.873486	0.666152	0.508576	0.630637	0.690864	0.697305	0.604423	0.622854	0.683257	0.756786	0.802377	0.752496	0.810542
	0.740504	0.693541	0.855581	0.723905	0.488484	0.602789	0.659206	0.685616	0.587838	0.606417	0.660514	0.694724	0.763246	0.717345	0.773869
	0.711978	0.622958	0.845125	0.849972	0.520827	0.714223	0.694423	0.731512	0.619695	0.609536	0.619382	0.672766	0.721617	0.707242	0.762028
	0.988284	0.889255	1.31594	1.31533	0.689013	1.13096	0.831949	0.964481	0.887682	0.734399	0.81789	0.853614	0.933848	0.973925	1.01311
	1.20718	1.13008	1.72567	1.73219	0.754876	1.30713	0.967749	1.17924	1.02649	0.872721	1.0029	1.11009	1.12239	1.16771	1.20107
	1.39543	1.42799	2.14093	1.93859	0.782417	1.36849	1.06693	1.32246	1.11645	0.944227	1.13882	1.35178	1.2662	1.30093	1.35288
	1.36982	1.37015	2.35981	1.95094	0.823777	1.43689	1.10031	1.28834	1.07286	0.922818	1.14813	1.28728	1.3132	1.29439	1.37414
	1.44004	1.49273	2.60852	2.0519	0.801725	1.43968	1.1351	1.37472	1.12775	0.96825	1.1979	1.36551	1.36467	1.34709	1.41639
	1.5708	1.48314	2.67661	2.03907	0.801823	1.49725	1.155	1.34974	1.07875	0.95083	1.18977	1.40317	1.42439	1.43015	1.50388
	1.51455	1.46576	2.76579	2.00057	0.719494	1.38092	1.17986	1.40958	1.12843	0.972409	1.21747	1.46157	1.42446	1.35017	1.43651
	1.48763	1.39038	2.65352	1.81959	0.650299	1.2349	1.16476	1.36758	1.10635	0.960383	1.23806	1.4262	1.41008	1.50136	1.61005
	1.61534	1.45752	2.75381	1.86061	0.73939	1.39769	1.23929	1.39945	1.15054	0.963923	1.24393	1.45395	1.47056	1.46621	1.56447
	1.58703	1.45796	2.68668	1.81846	0.692639	1.27669	1.16864	1.28403	1.05401	0.942542	1.236	1.47499	1.48751	1.54383	1.70598
	1.69531	1.51941	2.64303	1.69466	0.624914	1.16378	1.10689	1.25056	1.1188	0.979967	1.28644	1.50564	1.54322	1.60941	1.7541
	1.79159	1.62236	2.78766	1.77865	0.759188	1.38849	1.16627	1.41573	1.20364	0.994437	1.28192	1.58722	1.59052	1.68226	1.83342
	1.75047	1.52765	2.65566	1.69085	0.749289	1.291	1.16735	1.39494	1.15054	0.969571	1.27463	1.49909	1.54292	1.66477	1.86699
	1.56862	1.42814	2.50126	1.5673	0.658924	1.15649	1.09632	1.2545	1.0449	0.914248	1.18491	1.43092	1.44096	1.4503	1.64063
	1.35424	1.27963	2.31689	1.39038	0.609527	1.06884	1.03328	1.13145	0.940819	0.852631	1.08092	1.27585	1.32864	1.24884	1.46945
	1.37571	1.2684	2.33811	1.44594	0.720376	1.35064	1.09427	1.21271	0.996778	0.862578	1.07383	1.23696	1.3272	1.32446	1.48037
	1.46034	1.3189	2.37161	1.51669	0.7931	1.4457	1.14518	1.27132	1.07314	0.92515	1.11425	1.32266	1.35157	1.34146	1.51992
	1.3354	1.20665	2.22044	1.37316	0.708909	1.30904	1.18391	1.27042	1.02001	0.898205	1.06961	1.28088	1.29874	1.19602	1.39949
	1.59133	1.37659	2.3131	1.31362	0.664412	1.18582	1.1482	1.23559	1.08165	0.970273	1.1759	1.47011	1.41932	1.47746	1.6212
	1.59576	1.48374	2.46737	1.41776	0.740174	1.41976	1.1098	1.19769	1.098	1.01337	1.18845	1.4509	1.43385	1.40547	1.54233
	1.57692	1.42095	2.45513	1.4297	0.766245	1.46151	1.18515	1.27526	1.06201	0.980276	1.14786	1.40927	1.39979	1.3806	1.54119
	1.74582	1.51131	2.47586	1.39241	0.738018	1.39562	1.15209	1.24211	1.09012	1.00197	1.22544	1.54834	1.47056	1.62726	1.78755
	1.67457	1.46036	2.43513	1.28186	0.650495	1.25187	1.09384	1.1502	1.06562	0.996769	1.22749	1.49939	1.46768	1.53343	1.68679
	1.43807	1.28533	2.24135	1.15783	0.622758	1.17175	1.09082	1.11374	0.981386	0.949454	1.1401	1.32098	1.34976	1.31169	1.51768
	1.24975	1.18867	2.11497	1.20015	0.726061	1.37781	1.1276	1.21258	0.964404	0.908769	1.02726	1.20479	1.18468	1.1527	1.35161
	1.43225	1.35681	2.32469	1.36764	0.829364	1.50064	1.13612	1.16537	0.922086	0.884268	0.990181	1.20814	1.25946	1.20866	1.36788
	1.54475	1.35172	2.25773	1.28519	0.758698	1.39239	1.12868	1.16788	0.964523	0.924531	1.08945	1.37923	1.35839	1.45919	1.64413
	1.41551	1.23213	2.08604	1.1536	0.684505	1.24908	1.14642	1.25348	1.04264	0.970442	1.11381	1.35011	1.32887	1.30195	1.51124
	1.28751	1.13427	1.93417	1.03688	0.611291	1.11151	1.11477	1.21152	0.974983	0.972521	1.04893	1.25877	1.26022	1.21181	1.41375
	1.25731	1.07568	1.79468	0.964585	0.5616	1.0153	1.03969	1.11767	0.906893	0.948695	1.03978	1.224	1.2662	1.33233	1.53015
	1.59948	1.28848	1.94933	1.02429	0.615211	1.03024	1.00523	1.09388	1.01738	0.997275	1.17877	1.50259	1.43415	1.62327	1.76944
	1.66038	1.47295	2.16363	1.26294	0.7537	1.34841	1.08656	1.29375	1.18546	1.09028	1.28722	1.49543	1.47578	1.68879	1.86647
	1.68571	1.45991	2.27032	1.31257	0.810154	1.48486	1.15354	1.39305	1.15503	1.09612	1.26991	1.4817	1.43476	1.56815	1.77352
	1.58456	1.37749	2.16185	1.22411	0.787709	1.38888	1.16659	1.33034	1.06932	1.05476	1.18778	1.3986	1.37655	1.41273	1.63022
	1.465	1.29012	2.06474	1.13143	0.680486	1.25625	1.19879	1.27005	0.982818	1.00812	1.09782	1.30284	1.30775	1.29004	1.49497
	1.34842	1.24052	1.9638	1.07091	0.654121	1.14673	1.16924	1.20701	0.92141	0.971285	1.03867	1.24215	1.26718	1.17551	1.38386
	1.19277	1.14072	1.78605	0.926813	0.585416	1.03048	1.059	1.09626	0.857455	0.902841	0.95168	1.12763	1.13503	1.07145	1.26625
	1.11221	1.04451	1.65017	0.889286	0.615995	0.942988	1.01915	1.00812	0.794615	0.872299	0.895735	1.05886	1.09893	1.00145	1.17578
	1.01877	0.944852	1.52117	0.827471	0.566108	0.885339	0.953781	0.951315	0.759893	0.826529	0.826832	0.982464	1.01574	0.920927	1.08858
	0.940038	0.87322	1.40742	0.744781	0.534647	0.815378	0.878924	0.876871	0.700553	0.777837	0.780099	0.885178	0.937027	0.850021	1.00195
	0.916024	0.804885	1.34247	0.722931	0.549642	0.776614	0.848021	0.834215	0.692877	0.74797	0.746761	0.908966	0.917802	0.842882	0.945738
	0.860137	0.744193	1.26854	0.698481	0.54778	0.745418	0.806116	0.786924	0.664797	0.728752	0.717405	0.832113	0.880109	0.798112	0.905271
	0.809562	0.761427	1.19247	0.69247	0.532882	0.706016	0.794628	0.763791	0.652428	0.710517	0.684607	0.806953	0.851877	0.775909	0.876071
	0.803522	0.711674	1.14115	0.664122	0.501911	0.693984	0.735411	0.733932	0.636002	0.681802	0.668376	0.760903	0.823191	0.738702	0.824682
	0.756949	0.736101	1.07162	0.631387	0.506028	0.655657	0.722144	0.703088	0.603587	0.660616	0.651336	0.746264	0.788223	0.727993	0.812439
	0.763499	0.659523	1.03402	0.619284	0.467314	0.640199	0.712113	0.690497	0.599014	0.641848	0.630011	0.730406	0.769603	0.711356	0.787435
	0.761461	0.657276	0.975298	0.627325	0.472704	0.620996	0.680833	0.666215	0.595792	0.646877	0.611486	0.68466	0.750606	0.686127	0.749957
	0.73883	0.605575	0.962534	0.573877	0.463981	0.615259	0.669076	0.643083	0.570377	0.616448	0.604333	0.668649	0.707387	0.668461	0.744554
	0.713215	0.672411	0.932038	0.593128	0.462021	0.595538	0.655215	0.648497	0.566997	0.611559	0.586753	0.690759	0.71594	0.671426	0.722998
	0.704337	0.644088	0.891696	0.567054	0.492208	0.588845	0.639413	0.623682	0.558287	0.602933	0.57609	0.668801	0.677944	0.629984	0.699833
	0.714452	0.644688	0.855581	0.572496	0.509556	0.57996	0.632348	0.630942	0.55427	0.600152	0.573627	0.659042	0.676658	0.625446	0.703397
	0.699898	0.615765	0.854187	0.579888	0.507106	0.583347	0.638928	0.617038	0.556656	0.602062	0.581253	0.681458	0.700651	0.671002	0.696212
	0.693713	0.587742	0.828352	0.55292	0.464765	0.554661	0.607971	0.591116	0.538559	0.579613	0.55409	0.612687	0.645247	0.647408	0.671725
	0.662058	0.56886	0.799948	0.533182	0.449672	0.542311	0.574048	0.582503	0.525633	0.570032	0.549737	0.591491	0.62852	0.622058	0.667127
	0.678868	0.536191	0.787967	0.539355	0.46996	0.546494	0.586668	0.58685	0.521378	0.563738	0.553449	0.634187	0.626703	0.61383	0.660631
	0.67552	0.574254	0.753333	0.537812	0.495541	0.543625	0.586884	0.573397	0.520702	0.568908	0.548927	0.626715	0.629352	0.610442	0.655113
	0.667588	0.584595	0.753768	0.522541	0.471136	0.560598	0.591468	0.568065	0.521974	0.557613	0.542786	0.613754	0.615501	0.597858	0.666322
	0.646558	0.518058	0.742006	0.506051	0.446437	0.534104	0.548161	0.562938	0.517599	0.551403	0.535295	0.585239	0.608689	0.567911	0.660804
	0.672828	0.549528	0.722837	0.545122	0.4926	0.530239	0.555819	0.568024	0.515531	0.556995	0.533439	0.638914	0.603467	0.596164	0.65793
	0.667734	0.569909	0.717086	0.540736	0.473292	0.533825	0.570003	0.547927	0.505508	0.545138	0.549231	0.592711	0.573948	0.576925	0.621889
	0.661694	0.513262	0.713165	0.536918	0.458493	0.525857	0.560889	0.553259	0.507219	0.544997	0.536645	0.589052	0.595973	0.592534	0.6262
	0.657037	0.483441	0.700924	0.513768	0.471822	0.525139	0.550426	0.540503	0.50698	0.54185	0.531583	0.583105	0.568801	0.587029	0.613612
	0.639208	0.5789	0.709201	0.527252	0.496227	0.54506	0.554039	0.557606	0.516008	0.539799	0.533507	0.625496	0.586285	0.588239	0.635627
	0.65187	0.549678	0.697351	0.514418	0.489072	0.530717	0.548808	0.556991	0.507099	0.535866	0.52912	0.599268	0.587193	0.591203	0.620797
	0.633605	0.524502	0.668206	0.487856	0.438204	0.521076	0.522543	0.527378	0.498349	0.529038	0.518761	0.570753	0.55056	0.569907	0.592114
	0.65791	0.567061	0.670733	0.52579	0.476821	0.540279	0.541959	0.543292	0.514418	0.539996	0.52777	0.614212	0.585604	0.586061	0.62482
	0.648159	0.546531	0.6872	0.521729	0.463001	0.529203	0.532413	0.547065	0.508054	0.547948	0.536307	0.622446	0.575235	0.598584	0.607863
	0.65398	0.54743	0.659449	0.527983	0.456042	0.521873	0.544763	0.539683	0.503838	0.542131	0.530065	0.610857	0.591583	0.578982	0.614646
	0.636589	0.542035	0.661933	0.509544	0.494756	0.511235	0.532359	0.544563	0.497116	0.540137	0.519942	0.570601	0.552225	0.574566	0.600161
	0.632586	0.512213	0.664851	0.509057	0.478781	0.513785	0.530148	0.529757	0.506901	0.532944	0.527399	0.599268	0.569028	0.585032	0.608611
	0.640373	0.489735	0.648166	0.502071	0.479271	0.504821	0.521033	0.525901	0.48606	0.526538	0.527028	0.538731	0.554572	0.578619	0.584239
	0.629166	0.533943	0.644986	0.503858	0.478683	0.522869	0.522328	0.524835	0.491469	0.529741	0.526252	0.574565	0.564487	0.566277	0.602
	0.606607	0.481493	0.634966	0.476647	0.451142	0.511873	0.512998	0.515606	0.482003	0.526004	0.514374	0.544221	0.553058	0.565551	0.572455
	0.627711	0.540536	0.643287	0.484526	0.486034	0.501394	0.519146	0.510849	0.485503	0.522492	0.514847	0.560994	0.548214	0.564644	0.599069
	0.658565	0.55747	0.648122	0.50134	0.487896	0.50251	0.518337	0.524589	0.483037	0.54171	0.5192	0.57731	0.549652	0.561256	0.594183
	0.653835	0.497228	0.636447	0.502071	0.447319	0.512072	0.512458	0.533612	0.480253	0.523391	0.516028	0.537664	0.559643	0.551092	0.592171
	0.612284	0.517458	0.609959	0.481764	0.450848	0.496932	0.524269	0.508757	0.470708	0.514681	0.51154	0.544678	0.55828	0.557263	0.58102
	0.630694	0.510265	0.634791	0.49403	0.456336	0.502629	0.516395	0.534966	0.487651	0.532129	0.526117	0.558707	0.543218	0.561437	0.585446
	0.650415	0.508617	0.641283	0.502477	0.481427	0.510159	0.531604	0.531397	0.490315	0.531679	0.523552	0.594541	0.564638	0.586424	0.601196
	0.630621	0.519706	0.637667	0.487856	0.469176	0.502709	0.531011	0.523112	0.491668	0.526875	0.518592	0.584629	0.556388	0.584306	0.599529
	0.632077	0.517758	0.64699	0.487775	0.458395	0.50757	0.540071	0.528895	0.496639	0.538142	0.525037	0.57487	0.570845	0.593442	0.599529
	0.627492	0.486738	0.623203	0.490862	0.448103	0.499602	0.522597	0.522825	0.500974	0.510101	0.512991	0.544678	0.546549	0.574868	0.592631
	0.634697	0.512213	0.631001	0.507351	0.45663	0.505259	0.530256	0.536032	0.505111	0.526144	0.528614	0.551235	0.557902	0.59078	0.604242
	0.636589	0.538289	0.634486	0.515393	0.45369	0.521394	0.538615	0.536278	0.507378	0.545447	0.531212	0.596066	0.575613	0.588662	0.593608
	0.786931	0.593736	0.679315	0.515149	0.496325	0.511833	0.551019	0.549854	0.560872	0.562979	0.638042	0.770357	0.700878	0.818017	0.827959
	1.28082	0.953244	1.12791	0.817237	0.622856	0.843466	0.692482	0.798368	0.861791	0.756202	0.947496	1.07167	1.06403	1.32863	1.2793
	1.46725	1.15675	1.42668	1.02713	0.706263	1.13088	0.889009	1.04901	1.00744	0.870585	1.12525	1.26792	1.24773	1.44243	1.49457
	1.51026	1.26165	1.56408	1.17594	0.746055	1.26625	1.02637	1.23764	1.10918	0.939985	1.25003	1.35621	1.32395	1.45036	1.56602
	1.58296	1.31935	1.59641	1.14085	0.741449	1.1602	1.08413	1.21488	1.00644	0.927285	1.22793	1.37054	1.36709	1.40946	1.5486
	1.66293	1.40746	1.82761	1.29088	0.777418	1.33833	1.04039	1.19425	1.04721	0.946138	1.28283	1.54041	1.45572	1.67627	1.79393
	1.75353	1.50832	2.00579	1.35659	0.83446	1.48594	1.09476	1.23662	1.07485	0.968588	1.31975	1.57289	1.54087	1.73937	1.90843
	1.55472	1.36865	1.88303	1.34969	0.830148	1.51996	1.14162	1.30696	1.10226	0.950802	1.29181	1.51998	1.46458	1.52332	1.76749
	1.53027	1.29732	1.74619	1.22825	0.739194	1.34104	1.15225	1.29384	1.13499	0.974657	1.2855	1.47332	1.44573	1.57505	1.79456
	1.65944	1.39532	1.86808	1.23735	0.778399	1.42219	1.18493	1.36069	1.20578	1.00492	1.34839	1.55596	1.48289	1.68213	1.89728
	1.6443	1.33343	1.84687	1.2116	0.761247	1.43888	1.21233	1.33719	1.13014	0.973561	1.2884	1.49695	1.48532	1.61359	1.83957
	1.65092	1.4214	1.96606	1.29461	0.802607	1.51291	1.24997	1.39375	1.08798	0.923604	1.22338	1.42909	1.45565	1.46887	1.71035
	1.76568	1.43504	2.07641	1.27813	0.802411	1.53908	1.2853	1.46549	1.16235	0.963867	1.25138	1.53553	1.51408	1.61129	1.77335
	1.632	1.41061	2.06082	1.26878	0.804273	1.53745	1.2983	1.41618	1.11343	0.959484	1.23282	1.43809	1.46163	1.45332	1.67345
	1.42927	1.25101	1.87741	1.14369	0.721847	1.34741	1.21012	1.31094	1.03241	0.900199	1.12562	1.29521	1.34499	1.29397	1.50831
	1.31124	1.17638	1.72506	0.999188	0.670293	1.21068	1.15004	1.23305	0.974506	0.875053	1.11189	1.34538	1.31683	1.29137	1.48974
	1.60399	1.34108	1.7796	1.06311	0.665883	1.21486	1.14696	1.2924	1.10957	0.932258	1.23988	1.4756	1.46072	1.54716	1.72547
	1.66206	1.4211	1.94955	1.1908	0.763109	1.38052	1.27683	1.41241	1.15062	0.962519	1.29403	1.54544	1.49122	1.65104	1.84049
	1.67734	1.52061	2.09031	1.23767	0.797118	1.4604	1.27214	1.42102	1.18681	0.978281	1.33024	1.50335	1.52097	1.64154	1.8371
	1.74058	1.4764	2.17147	1.26992	0.790748	1.46478	1.3292	1.37394	1.0805	0.939001	1.26539	1.50442	1.55495	1.56126	1.79318
	1.70783	1.44403	2.0379	1.18967	0.746349	1.32155	1.32569	1.32037	1.09736	0.940603	1.32447	1.55444	1.64305	1.72412	1.97586
	1.56789	1.31905	1.8846	1.05109	0.683034	1.19359	1.28826	1.26558	1.12632	0.975022	1.36186	1.5738	1.58371	1.64874	1.9251
	1.35242	1.15001	1.7261	0.952482	0.615309	1.11964	1.24733	1.33395	1.09374	0.935124	1.26839	1.38548	1.48395	1.44697	1.73064
	1.39892	1.22554	1.80274	1.12858	0.739096	1.37717	1.26906	1.36381	1.06519	0.895142	1.19601	1.33654	1.45375	1.40976	1.65804
	1.48341	1.35666	1.90124	1.22825	0.795354	1.51363	1.25413	1.33325	1.0706	0.919137	1.2776	1.41186	1.54625	1.59544	1.84423
	1.62182	1.41615	2.12085	1.20876	0.730079	1.45721	1.2984	1.38493	1.16211	0.973729	1.35005	1.48094	1.57902	1.67784	1.95097
	1.68724	1.46246	2.20646	1.31671	0.833676	1.58378	1.26637	1.32972	1.08217	0.955382	1.32015	1.50564	1.62042	1.62484	1.92217
	1.5107	1.37045	2.07171	1.21891	0.758698	1.44271	1.19545	1.23789	1.01798	0.893203	1.21447	1.46371	1.51188	1.47976	1.76364
	1.32746	1.27724	1.893	1.06953	0.686857	1.29602	1.11552	1.16136	0.950245	0.839117	1.13784	1.33425	1.41303	1.33644	1.61298
	1.22668	1.04825	1.75142	0.95305	0.635205	1.1757	1.14594	1.23986	1.02665	0.861735	1.13629	1.23864	1.31547	1.29536	1.56837
	1.42628	1.13367	1.77747	1.03209	0.681858	1.33394	1.18768	1.32451	1.11128	0.927285	1.23522	1.31732	1.43127	1.53312	1.75513
	1.56316	1.30721	1.90638	1.1878	0.779085	1.48586	1.30299	1.43636	1.18439	0.959287	1.32359	1.49741	1.52203	1.69932	1.94844
	1.65616	1.44343	2.06748	1.26099	0.833186	1.52167	1.30353	1.4782	1.20045	0.995224	1.36219	1.46356	1.56744	1.68443	1.94183
	1.64787	1.50337	2.063	1.27293	0.781633	1.45088	1.24113	1.39486	1.14179	0.9687	1.31823	1.49619	1.54458	1.60627	1.83831
	1.50327	1.33149	1.893	1.15563	0.740763	1.35442	1.2023	1.31365	1.05628	0.909471	1.22351	1.34599	1.43173	1.40837	1.68265
	1.28162	1.13532	1.73377	0.994558	0.690091	1.22279	1.23433	1.31762	1.00481	0.863589	1.12029	1.15432	1.30397	1.27794	1.51601
	1.25324	1.00165	1.60416	0.88823	0.582084	1.10355	1.2552	1.46573	1.15368	0.927454	1.20705	1.23788	1.31562	1.39543	1.64413
	1.57524	1.26974	1.82112	1.0385	0.675194	1.26235	1.27872	1.47771	1.15957	0.964401	1.25506	1.41598	1.4421	1.52508	1.76766
	1.6165	1.416	1.93091	1.19097	0.785553	1.41912	1.26103	1.41348	1.12906	0.977129	1.31526	1.49512	1.53906	1.72854	1.94735
	1.67901	1.43534	2.06618	1.23654	0.802999	1.51908	1.28751	1.45728	1.19417	1.02902	1.38173	1.49344	1.5299	1.76659	2.01673
	1.67654	1.49768	2.16747	1.24775	0.812506	1.51876	1.29026	1.4782	1.19616	1.03504	1.39223	1.42147	1.50984	1.67118	1.93585
	1.53078	1.39547	2.04361	1.17253	0.784475	1.36984	1.21605	1.37	1.10703	0.995336	1.28627	1.41903	1.46397	1.49053	1.78404
	1.34922	1.2681	1.88412	1.0649	0.705185	1.22665	1.16314	1.27251	1.01372	0.92352	1.2002	1.26273	1.34234	1.34582	1.60522
	1.2317	1.14147	1.74632	0.946796	0.682152	1.1355	1.11757	1.19445	0.946864	0.89163	1.10582	1.14944	1.25969	1.2521	1.47186
	1.16249	1.14221	1.60965	0.895378	0.659806	1.05438	1.06326	1.10656	0.888319	0.826585	1.03516	1.12336	1.18672	1.14913	1.36776
	1.07473	1.03387	1.49538	0.841199	0.623738	0.974303	0.994823	1.05414	0.834069	0.79787	0.978371	1.03492	1.1317	1.06776	1.28585
	0.974458	0.977072	1.39405	0.756884	0.560423	0.900876	0.967641	0.980477	0.787217	0.763395	0.900223	0.941446	1.04942	0.992861	1.19021
	0.953646	0.870673	1.32495	0.720331	0.54435	0.861036	0.906105	0.938969	0.761007	0.72007	0.860339	0.890058	0.99561	0.953294	1.11686
	0.907728	0.834108	1.24763	0.670701	0.528668	0.786733	0.868677	0.887125	0.727837	0.698688	0.822142	0.83745	0.963972	0.883538	1.04742
	0.881531	0.82122	1.18154	0.693364	0.48917	0.786016	0.854654	0.860137	0.708547	0.677587	0.784418	0.828759	0.93627	0.892492	1.00592
	0.83474	0.756631	1.13662	0.669158	0.537587	0.761952	0.833891	0.814856	0.682576	0.655362	0.754522	0.810308	0.892219	0.826487	0.967466
	0.836196	0.729507	1.08321	0.628787	0.5468	0.7151	0.81523	0.799926	0.665275	0.641426	0.7308	0.774474	0.867015	0.816807	0.913031
	0.809198	0.688446	1.02518	0.619852	0.502891	0.686016	0.778503	0.775768	0.652547	0.624062	0.724727	0.703568	0.837723	0.808579	0.876358
	0.79217	0.706129	1.01063	0.600439	0.515143	0.691036	0.783518	0.759608	0.633655	0.61125	0.693278	0.70982	0.810627	0.756852	0.855895
	0.787658	0.687996	0.972075	0.607343	0.516711	0.659323	0.767015	0.730282	0.61544	0.611475	0.693886	0.730558	0.794883	0.759272	0.830833
	0.778562	0.655028	0.930949	0.604094	0.527786	0.653586	0.751861	0.718592	0.632343	0.616869	0.690174	0.734523	0.792007	0.744752	0.817785
	0.745088	0.629552	0.897839	0.597514	0.486132	0.647092	0.735142	0.693368	0.614127	0.596078	0.657106	0.664837	0.754314	0.718313	0.795884
	0.746107	0.590739	0.885205	0.552108	0.499461	0.619562	0.715349	0.67852	0.587718	0.57714	0.652348	0.683135	0.75492	0.70101	0.76266
	0.766337	0.685749	0.881328	0.582568	0.528864	0.623267	0.74636	0.671753	0.586883	0.57891	0.641652	0.720494	0.756585	0.713655	0.766511
	0.752001	0.618612	0.830226	0.570222	0.495148	0.611195	0.705641	0.655798	0.584059	0.574752	0.637029	0.681915	0.718438	0.681348	0.743691
	0.743342	0.632399	0.818637	0.572902	0.523179	0.600478	0.691511	0.646692	0.577974	0.566014	0.625321	0.652333	0.685437	0.70101	0.718515
	0.711541	0.61052	0.801777	0.52709	0.51132	0.59008	0.697929	0.641196	0.573002	0.577562	0.625624	0.676578	0.695126	0.670881	0.709663
	0.729443	0.605275	0.796201	0.547153	0.492796	0.580717	0.6653	0.644231	0.567037	0.562979	0.625388	0.68649	0.684378	0.652611	0.714836
	0.710959	0.549678	0.780387	0.52449	0.465353	0.5749	0.66255	0.614741	0.546076	0.550926	0.611385	0.606587	0.642371	0.64408	0.706961
	0.698952	0.513113	0.764485	0.517099	0.447025	0.564462	0.641948	0.605595	0.540548	0.539237	0.590059	0.598201	0.637375	0.638393	0.684716
	0.701717	0.587592	0.762481	0.531557	0.479761	0.575458	0.653112	0.608178	0.545361	0.543115	0.60467	0.641049	0.637602	0.660476	0.697649
	0.708994	0.596883	0.745535	0.548778	0.499265	0.571514	0.641732	0.606251	0.551008	0.55323	0.616581	0.65828	0.670375	0.664771	0.693568
	0.710814	0.564214	0.745273	0.536025	0.490836	0.552151	0.616546	0.601739	0.549378	0.54643	0.598664	0.612077	0.649561	0.654728	0.673047
	0.676903	0.538738	0.72471	0.511494	0.479663	0.540916	0.597293	0.58804	0.544565	0.536006	0.588069	0.60064	0.609219	0.650251	0.661838
	0.699462	0.542784	0.718873	0.54366	0.478977	0.555378	0.608403	0.58763	0.521497	0.543002	0.594311	0.601555	0.644793	0.620848	0.661493
	0.70441	0.551027	0.721138	0.524165	0.502107	0.553426	0.603818	0.595997	0.535656	0.545419	0.592016	0.611772	0.624962	0.620122	0.650859
	0.705938	0.567061	0.707763	0.533588	0.479467	0.544422	0.593625	0.568352	0.517639	0.544632	0.581253	0.562977	0.611641	0.644141	0.658734
	0.680541	0.586693	0.69587	0.506864	0.474174	0.536056	0.602308	0.572495	0.528775	0.541429	0.578418	0.606587	0.592416	0.635792	0.662643
	0.703173	0.582796	0.692341	0.534887	0.440851	0.553745	0.592547	0.573561	0.524321	0.542918	0.585808	0.57426	0.604678	0.631194	0.653044
	0.657546	0.483441	0.695173	0.493299	0.442811	0.536653	0.586183	0.558796	0.525037	0.530527	0.569847	0.551388	0.586437	0.600823	0.634822
	0.671591	0.554923	0.685066	0.536999	0.488484	0.5449	0.592978	0.559944	0.533986	0.544379	0.573964	0.597133	0.619588	0.612681	0.64764
	0.679232	0.508617	0.667073	0.538055	0.47535	0.546932	0.567253	0.578237	0.525673	0.538985	0.575111	0.594541	0.611792	0.629681	0.649135
	0.664823	0.540387	0.678836	0.499797	0.463295	0.553745	0.586398	0.56827	0.519707	0.521649	0.571433	0.60125	0.591356	0.591687	0.646606
	0.665041	0.519556	0.663588	0.495736	0.448496	0.549004	0.570273	0.556745	0.516844	0.536512	0.57005	0.582495	0.593324	0.593744	0.65017
	0.677048	0.533343	0.657837	0.498335	0.479369	0.546773	0.571729	0.550265	0.515531	0.529769	0.575213	0.598201	0.591205	0.611108	0.65017
	0.65056	0.488386	0.668772	0.503371	0.476527	0.547928	0.55501	0.55252	0.507974	0.527156	0.574605	0.549253	0.583106	0.602819	0.606082
	0.689929	0.57935	0.670733	0.507676	0.480643	0.558924	0.566929	0.561298	0.53152	0.533506	0.57916	0.601708	0.601953	0.600278	0.63304
	0.67683	0.576203	0.663457	0.520023	0.485739	0.546653	0.566498	0.55937	0.523446	0.52724	0.586753	0.587374	0.60165	0.612923	0.636374
	0.644884	0.529597	0.6608	0.476647	0.448202	0.539761	0.54897	0.54485	0.51919	0.524824	0.571872	0.590729	0.588253	0.61619	0.623786
	0.66868	0.478645	0.645857	0.481114	0.464373	0.549442	0.549078	0.543169	0.518116	0.534995	0.561142	0.567704	0.562368	0.592958	0.628269
	0.686872	0.554923	0.652915	0.512062	0.458395	0.555936	0.563963	0.55695	0.538719	0.536849	0.575213	0.601098	0.606948	0.621393	0.643962
	0.699389	0.58999	0.673347	0.513849	0.474664	0.54243	0.570489	0.56745	0.539156	0.544857	0.607201	0.634645	0.616863	0.681529	0.724953
	1.12538	0.806234	0.894833	0.677443	0.565324	0.697331	0.650092	0.693983	0.802331	0.697761	0.900391	1.0244	0.942855	1.24775	1.25614
	1.40271	1.07897	1.31411	0.988141	0.709301	1.11721	0.885126	0.992248	1.04367	0.855806	1.10612	1.24108	1.19074	1.51975	1.56073
	1.54512	1.24697	1.56112	1.14881	0.784181	1.30175	1.02691	1.19121	1.1079	0.928999	1.21609	1.4509	1.37057	1.58419	1.73616
	1.47657	1.22584	1.53908	1.15401	0.760953	1.27315	1.10754	1.28936	1.13662	0.981737	1.29005	1.42223	1.36414	1.52054	1.67333
	1.62989	1.37869	1.71979	1.22451	0.762521	1.28896	1.09551	1.2084	1.03516	0.947768	1.27689	1.48994	1.43831	1.60227	1.81169
	1.76525	1.48929	1.90032	1.34709	0.828188	1.44494	1.12663	1.27489	1.10981	1.0079	1.37225	1.56953	1.51385	1.75274	1.93763
	1.73999	1.49528	2.02941	1.41743	0.881603	1.63606	1.18768	1.28735	1.12512	1.01686	1.39081	1.60079	1.57342	1.77391	1.99195
	1.63135	1.3706	1.89662	1.29128	0.797118	1.45582	1.20812	1.32218	1.17027	1.04192	1.43619	1.56648	1.53308	1.80235	2.07863
	1.72988	1.35142	1.90189	1.241	0.775948	1.43956	1.23223	1.37398	1.20049	1.04212	1.4481	1.6505	1.59953	1.94712	2.21952
	1.72522	1.36505	1.91509	1.25782	0.786729	1.42522	1.25073	1.39153	1.20169	1.04869	1.43835	1.60522	1.63223	1.85686	2.17262
	1.80752	1.4232	1.98941	1.29567	0.842595	1.55781	1.31922	1.48554	1.17556	1.01003	1.37056	1.58844	1.60748	1.79678	2.08961
	1.84908	1.45512	2.01642	1.31452	0.808292	1.5708	1.34284	1.55962	1.22448	1.03293	1.40292	1.53965	1.63866	1.87108	2.18474
	1.83954	1.43339	2.09502	1.33125	0.840439	1.5402	1.41366	1.59407	1.21939	1.04664	1.40569	1.59668	1.63382	1.79539	2.12071
	1.6638	1.33119	1.96188	1.20055	0.725277	1.39641	1.35104	1.47357	1.14052	0.986823	1.31256	1.42299	1.54367	1.62877	1.91251
	1.5024	1.208	1.82857	1.09934	0.690973	1.27092	1.29344	1.38989	1.09303	0.963811	1.25192	1.40119	1.47919	1.51987	1.80531
	1.63593	1.2146	1.7803	1.08618	0.703421	1.28566	1.30984	1.42992	1.1791	1.00374	1.32903	1.4445	1.55866	1.64813	1.9339
	1.70688	1.33838	1.90063	1.22232	0.755268	1.37151	1.30493	1.41618	1.14382	1.00495	1.31533	1.47438	1.61611	1.67391	1.95022
	1.74007	1.33193	1.92049	1.1865	0.761345	1.40028	1.29932	1.41081	1.18196	1.02947	1.39823	1.59424	1.65599	1.8113	2.14008
	1.81575	1.3724	2.01442	1.27593	0.765461	1.46538	1.30461	1.42664	1.21346	1.04156	1.40566	1.53355	1.67991	1.83187	2.1575
	1.75229	1.39203	1.90559	1.20957	0.757522	1.39761	1.29614	1.36594	1.161	1.02695	1.37296	1.56496	1.66818	1.74366	2.08823
	1.64219	1.38843	1.94053	1.32361	0.855141	1.61817	1.25531	1.29773	1.08957	0.968054	1.3133	1.53919	1.60218	1.5929	1.90705
	1.66104	1.44163	2.07994	1.39834	0.939136	1.70183	1.29436	1.34014	1.08766	0.921947	1.2281	1.47149	1.54753	1.52707	1.82756
	1.77631	1.43788	2.19927	1.38258	0.899539	1.64681	1.34489	1.45818	1.2269	0.998595	1.32936	1.52303	1.60157	1.68431	1.96563
	1.66322	1.32744	2.05742	1.2501	0.792708	1.51418	1.41711	1.55227	1.22412	0.995504	1.32312	1.44129	1.57319	1.58491	1.8855
	1.59795	1.27859	1.95508	1.16603	0.716652	1.37633	1.41015	1.49416	1.18856	1.00556	1.33456	1.46584	1.57009	1.60651	1.91395
	1.74516	1.29417	2.04919	1.17367	0.719886	1.42825	1.37941	1.52533	1.27236	1.03832	1.41858	1.50976	1.61876	1.71716	1.99931
	1.71321	1.32804	2.04653	1.24953	0.781535	1.47904	1.48129	1.57918	1.25916	1.0408	1.41493	1.47667	1.60672	1.60633	1.89458
	1.65209	1.25671	1.94437	1.12152	0.713614	1.36606	1.50383	1.53546	1.27041	1.02436	1.42138	1.51738	1.59045	1.69369	1.98954
	1.66446	1.26435	1.86634	1.04857	0.660688	1.2551	1.41716	1.47763	1.27053	1.04498	1.44473	1.55871	1.59946	1.81554	2.12686
	1.83212	1.44942	2.11445	1.15157	0.6995	1.30124	1.35805	1.37574	1.20129	1.03411	1.39584	1.59393	1.66546	1.75891	2.06524
	1.75848	1.45317	2.21051	1.26651	0.794864	1.54737	1.28918	1.28879	1.11447	0.953809	1.31418	1.57884	1.6183	1.63622	1.91119
	1.66584	1.45782	2.17892	1.29388	0.852592	1.5549	1.27084	1.28498	1.04486	0.915906	1.23151	1.43108	1.54549	1.50451	1.7676
	1.70681	1.4223	2.21983	1.2934	0.846418	1.59394	1.34651	1.42049	1.21453	0.976511	1.2856	1.44343	1.52006	1.60137	1.87808
	1.72617	1.38004	2.25386	1.2938	0.838675	1.56753	1.42865	1.55433	1.22102	0.999831	1.29643	1.42238	1.51203	1.55212	1.86095
	1.6216	1.312	2.13309	1.20924	0.750858	1.45725	1.46823	1.53931	1.21024	1.01292	1.30608	1.37222	1.4751	1.53028	1.8087
	1.49185	1.2095	1.98218	1.12802	0.733412	1.33243	1.43906	1.55314	1.3146	1.0837	1.40383	1.46767	1.47495	1.67258	1.96563
	1.43305	1.11854	1.83406	1.00788	0.623836	1.22618	1.38405	1.57766	1.27049	1.09508	1.39374	1.44678	1.4723	1.60899	1.88837
	1.65085	1.22449	1.85602	1.03485	0.677252	1.17912	1.34441	1.49124	1.20125	1.07567	1.33645	1.52973	1.53028	1.65334	1.90608
	1.74596	1.42275	2.03115	1.23183	0.757816	1.43745	1.26955	1.37738	1.09879	1.04344	1.28054	1.5398	1.57622	1.72938	1.97684
	1.73752	1.50217	2.13261	1.34083	0.841419	1.57135	1.20866	1.28982	1.04653	1.00199	1.21538	1.48567	1.52657	1.68195	1.91924
	1.70878	1.45017	2.14303	1.35326	0.886896	1.61606	1.30849	1.40962	1.10058	1.00916	1.20883	1.48384	1.46617	1.60076	1.82721
	1.68862	1.35217	2.05128	1.25749	0.851122	1.53968	1.41031	1.51893	1.21127	1.11565	1.30557	1.45685	1.50151	1.70083	1.96281
	1.80447	1.36625	2.15509	1.29989	0.838871	1.60502	1.50884	1.59645	1.23219	1.18788	1.37097	1.4721	1.53141	1.7698	2.03788
	1.84311	1.43519	2.25329	1.36017	0.859061	1.61988	1.47805	1.54518	1.21064	1.2295	1.40316	1.52043	1.57031	1.81862	2.02023
	1.77587	1.38648	2.13788	1.26919	0.797118	1.48665	1.3999	1.43796	1.13181	1.22882	1.33857	1.44953	1.49644	1.66259	1.94051
	1.61287	1.35067	2.03472	1.21599	0.81133	1.47434	1.33616	1.36442	1.05123	1.2046	1.28172	1.40775	1.4368	1.50106	1.76726
	1.42454	1.21535	1.91121	1.18691	0.857885	1.54183	1.31253	1.27497	1.00545	1.15937	1.18656	1.20265	1.29647	1.36082	1.60861
	1.27616	1.06744	1.75677	1.07985	0.784573	1.41641	1.36862	1.40298	1.08225	1.17996	1.12842	1.17917	1.21011	1.22796	1.5202
	1.24894	0.951596	1.63135	0.96889	0.703715	1.27598	1.44715	1.54112	1.23712	1.28524	1.27227	1.22858	1.22351	1.50378	1.74197
	1.44877	1.01663	1.64024	0.943059	0.635499	1.19936	1.49606	1.62057	1.27447	1.34705	1.38096	1.3742	1.35226	1.6877	1.95775
	1.64881	1.22314	1.89374	1.10787	0.706557	1.39048	1.53311	1.63824	1.27348	1.36279	1.42283	1.4047	1.42166	1.72503	1.98638
	1.68411	1.32714	1.99516	1.23264	0.814466	1.51661	1.49121	1.55962	1.19616	1.31261	1.38116	1.4724	1.4418	1.63519	1.88826
	1.67137	1.35996	2.05324	1.25238	0.816819	1.49339	1.42088	1.4549	1.13348	1.2613	1.31384	1.42147	1.41568	1.54498	1.79813
	1.69342	1.37659	2.14799	1.27	0.825836	1.58104	1.40508	1.46893	1.1709	1.23734	1.28307	1.35178	1.40668	1.53306	1.77059
	1.76081	1.33508	2.1618	1.27536	0.802215	1.55709	1.42131	1.50248	1.24802	1.26293	1.38561	1.41247	1.4253	1.62744	1.85923
	1.66526	1.34767	2.02697	1.17513	0.758894	1.42458	1.38669	1.43079	1.16339	1.24068	1.35575	1.39799	1.40206	1.49519	1.75364
	1.5024	1.19347	1.87911	1.0809	0.68225	1.29789	1.29991	1.32099	1.0986	1.1935	1.27183	1.25907	1.32145	1.37855	1.62999
	1.37811	1.07553	1.73438	1.03249	0.627168	1.20582	1.23218	1.24712	1.02848	1.1331	1.20175	1.2298	1.22828	1.28816	1.48043
	1.25448	0.984864	1.64237	0.928032	0.588552	1.12534	1.15818	1.17214	0.981864	1.07991	1.12272	1.11558	1.16016	1.18555	1.37644
	1.17996	0.951146	1.53498	0.863049	0.615995	1.0502	1.12054	1.10648	0.935728	1.03346	1.07025	1.0401	1.09128	1.09039	1.32287
	1.14074	0.923423	1.45212	0.826253	0.602372	1.00904	1.08192	1.047	0.883904	0.992723	1.01043	1.02257	1.04178	1.06915	1.24803
	1.03158	0.771767	1.3605	0.763545	0.515927	0.930398	0.999353	0.988105	0.830649	0.941474	0.94041	0.859561	0.972147	0.986569	1.19365
	0.998545	0.81043	1.30997	0.75266	0.553465	0.895179	1.00442	0.953652	0.832478	0.91762	0.893812	0.901494	0.972071	0.967996	1.14525
	0.986829	0.813727	1.26192	0.750792	0.550622	0.862191	0.969205	0.935072	0.804478	0.883257	0.874949	0.902257	0.920073	0.936657	1.07156
	0.930141	0.744193	1.19164	0.713183	0.545918	0.816972	0.923201	0.89902	0.779461	0.842741	0.845829	0.819305	0.903421	0.89225	1.06018
	0.93247	0.764724	1.15496	0.67127	0.526414	0.796614	0.891058	0.851237	0.759973	0.806524	0.821703	0.81717	0.855662	0.867506	1.0215
	0.921118	0.698187	1.10913	0.663797	0.526218	0.769163	0.870456	0.834051	0.751263	0.794386	0.790997	0.801616	0.851196	0.842459	0.992125
	0.879566	0.700584	1.05942	0.672732	0.514064	0.74506	0.823751	0.820106	0.731297	0.763058	0.772911	0.776609	0.81267	0.810938	0.963384
	0.855261	0.682901	1.01974	0.644464	0.511026	0.724861	0.816093	0.78069	0.719127	0.749375	0.746187	0.768984	0.792916	0.781233	0.904294
	0.837505	0.677656	1.00558	0.637804	0.53249	0.705657	0.808165	0.783438	0.704093	0.737181	0.745748	0.708448	0.808507	0.796479	0.906651
	0.819822	0.645886	0.972989	0.588742	0.518867	0.687809	0.779474	0.74837	0.687667	0.702902	0.72115	0.73437	0.776945	0.74451	0.876588
	0.830665	0.636895	0.943409	0.628137	0.513672	0.664661	0.762971	0.73426	0.685002	0.692535	0.716831	0.744434	0.748032	0.753464	0.836639
	0.788895	0.605425	0.90054	0.602713	0.499167	0.662271	0.749326	0.721792	0.667581	0.679694	0.704211	0.701128	0.714275	0.734104	0.819452
	0.775579	0.625356	0.881981	0.57672	0.473978	0.659243	0.702028	0.717731	0.657956	0.661937	0.690208	0.676121	0.732516	0.728961	0.778468
	0.791442	0.626705	0.877581	0.60515	0.514555	0.66255	0.708715	0.721586	0.642962	0.659998	0.687306	0.657365	0.721238	0.73483	0.793355
	0.79559	0.606324	0.861114	0.590448	0.500539	0.641474	0.705318	0.70071	0.632502	0.651316	0.670131	0.704636	0.718892	0.721762	0.796229
	0.776888	0.585194	0.844559	0.57672	0.488484	0.609402	0.692536	0.68135	0.637315	0.636706	0.666048	0.677341	0.704738	0.71795	0.785423
	0.761825	0.565862	0.825913	0.558687	0.456238	0.610319	0.674954	0.671794	0.63119	0.621112	0.647861	0.656145	0.686951	0.679956	0.736851
	0.770412	0.598981	0.813104	0.583299	0.503283	0.617809	0.696311	0.668635	0.635843	0.618471	0.669051	0.698231	0.700954	0.678081	0.749842
	0.750473	0.554623	0.794284	0.554707	0.464569	0.598486	0.659152	0.662237	0.618184	0.614846	0.648097	0.625801	0.675295	0.673301	0.722596
	0.75906	0.603177	0.789013	0.572415	0.500049	0.606733	0.662766	0.663385	0.617428	0.605715	0.647523	0.684203	0.681729	0.682739	0.738346
	0.742905	0.551926	0.788316	0.5582	0.467902	0.588725	0.648582	0.655018	0.605974	0.600264	0.643778	0.635255	0.645701	0.680682	0.724608
	0.750982	0.539787	0.769452	0.544716	0.494266	0.594422	0.634128	0.635495	0.595474	0.599028	0.640606	0.642269	0.641614	0.677536	0.710582
	0.748872	0.542335	0.760565	0.526846	0.509654	0.583904	0.637256	0.627948	0.600207	0.583265	0.620124	0.645319	0.643582	0.672515	0.696787
	0.743414	0.565113	0.753943	0.539924	0.482211	0.590717	0.621724	0.626964	0.588991	0.591385	0.628661	0.65279	0.655313	0.678383	0.708685
	0.739048	0.555372	0.752636	0.532857	0.477605	0.584821	0.624582	0.635372	0.579684	0.579079	0.6209	0.62702	0.6401	0.64166	0.684658
	0.762407	0.611569	0.745622	0.545366	0.51083	0.575538	0.627872	0.630614	0.599451	0.592818	0.622857	0.673529	0.625946	0.644746	0.721619
	0.722966	0.584295	0.735035	0.545366	0.484465	0.597809	0.626739	0.63328	0.608678	0.583013	0.619213	0.613602	0.641008	0.665497	0.70242
	0.715835	0.555672	0.701664	0.505402	0.457512	0.571315	0.616708	0.621509	0.587718	0.574864	0.608415	0.594541	0.612095	0.634824	0.690636
	0.731116	0.588641	0.726976	0.549752	0.475056	0.570876	0.622802	0.626225	0.580798	0.577449	0.617189	0.673224	0.645095	0.629137	0.697304
	0.727769	0.58924	0.710552	0.563642	0.49064	0.577291	0.623665	0.63246	0.581832	0.571774	0.620765	0.661177	0.642749	0.660173	0.694085
	0.743123	0.554473	0.720005	0.524247	0.4729	0.563466	0.608564	0.609163	0.577855	0.564553	0.601329	0.6534	0.638435	0.638635	0.689429
	0.705283	0.522554	0.709593	0.508488	0.45075	0.541833	0.596645	0.616012	0.565645	0.558175	0.600148	0.595151	0.615425	0.632222	0.676324
	0.715107	0.562865	0.707894	0.534481	0.453984	0.558127	0.595405	0.602887	0.567355	0.569329	0.610811	0.598506	0.650091	0.664045	0.673967
	0.718309	0.532744	0.71591	0.512062	0.472508	0.558127	0.596969	0.613428	0.567752	0.565536	0.590566	0.584629	0.61588	0.649888	0.680175
	0.712123	0.467406	0.68781	0.496223	0.444771	0.537888	0.582677	0.60744	0.563895	0.562839	0.592691	0.595151	0.594233	0.633372	0.647008
	0.690656	0.493181	0.690904	0.503777	0.454376	0.531992	0.590659	0.591936	0.566639	0.553679	0.596707	0.590576	0.608538	0.63918	0.667127
	0.739121	0.527199	0.699747	0.52246	0.466039	0.559562	0.611423	0.613387	0.5769	0.559973	0.604434	0.658432	0.610506	0.648134	0.683451
	0.728133	0.550877	0.697046	0.561205	0.501421	0.561554	0.607809	0.627128	0.574156	0.554831	0.609124	0.652333	0.614517	0.650009	0.697477
	0.719037	0.537539	0.673957	0.520754	0.480447	0.54761	0.586345	0.623641	0.576144	0.556629	0.600553	0.582495	0.600061	0.641297	0.667471
	0.709795	0.512513	0.680927	0.501015	0.469372	0.540359	0.593032	0.605882	0.554787	0.54806	0.610541	0.566331	0.613155	0.631315	0.670805
	0.71387	0.544133	0.682713	0.529202	0.482799	0.545378	0.590929	0.616464	0.564213	0.556461	0.60656	0.642421	0.604829	0.647045	0.674139
	0.719037	0.54698	0.678792	0.501097	0.484171	0.553865	0.609751	0.604241	0.591139	0.560732	0.616278	0.645014	0.621632	0.674814	0.710122
	1.0489	0.743743	0.847347	0.601657	0.500539	0.637171	0.650469	0.73262	0.801615	0.690259	0.8544	0.971485	0.875492	1.21574	1.21498
	1.40111	1.06968	1.25795	0.919584	0.693914	1.05645	0.851203	0.988147	0.984528	0.831811	1.09789	1.23117	1.13026	1.501	1.50399
	1.5374	1.21999	1.52766	1.07026	0.765167	1.22116	1.04282	1.20869	1.07	0.910961	1.20026	1.28683	1.25295	1.51649	1.58688
	1.4452	1.24112	1.61366	1.16164	0.840537	1.35371	1.18531	1.35327	1.09044	0.969599	1.25641	1.33394	1.26642	1.46676	1.56464
	1.37505	1.17653	1.55868	1.1242	0.70097	1.23231	1.14966	1.29597	1.01348	0.932146	1.20674	1.2298	1.19815	1.32422	1.45008
	1.61461	1.3694	1.75233	1.16709	0.842007	1.3257	1.14152	1.23641	1.01527	0.937934	1.23569	1.32723	1.30646	1.50039	1.63402
	1.70841	1.40372	1.82247	1.2397	0.833578	1.38247	1.17404	1.30635	1.08845	0.988789	1.32562	1.48323	1.39873	1.66604	1.79054
	1.72806	1.33838	1.93112	1.2631	0.856219	1.46032	1.21821	1.38112	1.14676	1.05906	1.415	1.49146	1.45444	1.75486	1.9074
	1.82208	1.39907	1.97229	1.225	0.786141	1.39578	1.20548	1.33875	1.13996	1.06117	1.43707	1.59042	1.49251	1.83139	2.0334
	1.84325	1.47235	2.09171	1.31452	0.873175	1.53733	1.24825	1.42808	1.18777	1.09174	1.47274	1.58615	1.51839	1.83701	2.02156
	1.70812	1.35276	1.94811	1.17748	0.754288	1.40653	1.28352	1.42902	1.1857	1.0431	1.39783	1.44709	1.4592	1.65787	1.90665
	1.63142	1.18343	1.82387	1.17034	0.832598	1.50968	1.34452	1.50236	1.25888	1.08595	1.4474	1.49848	1.43627	1.76823	2.02828
	1.7333	1.32609	1.98301	1.34262	0.876213	1.67602	1.40503	1.58037	1.27694	1.08249	1.46946	1.48567	1.44679	1.82249	2.05995
	1.69306	1.33838	1.958	1.28373	0.869548	1.59749	1.44326	1.62623	1.32295	1.09449	1.50833	1.52867	1.44755	1.81929	2.1095
	1.5708	1.22479	1.79189	1.13996	0.744977	1.43514	1.41074	1.60502	1.24126	1.05552	1.4316	1.45578	1.40198	1.6436	1.9393
	1.76954	1.39622	1.92555	1.17358	0.773498	1.42004	1.40869	1.57327	1.20789	1.03307	1.43015	1.52486	1.48524	1.83205	2.07513
	1.82208	1.43713	1.97408	1.30656	0.825738	1.57291	1.37655	1.58267	1.29376	1.06448	1.4749	1.57075	1.48744	1.83393	2.10795
	1.89499	1.51806	2.1307	1.39631	0.931393	1.68183	1.40562	1.57988	1.29583	1.0744	1.51016	1.6874	1.59968	1.9712	2.19607
	1.86603	1.46726	2.10996	1.41305	0.935215	1.64729	1.40557	1.57208	1.2973	1.08435	1.52787	1.68573	1.57357	1.9974	2.29379
	1.74341	1.41181	1.98179	1.34278	0.897971	1.62024	1.44094	1.61117	1.34093	1.06187	1.51272	1.56221	1.51824	1.84796	2.15284
	1.7643	1.43489	1.95639	1.26131	0.801725	1.48633	1.38874	1.50847	1.22893	1.04001	1.44368	1.59164	1.5059	1.72055	2.04782
	1.87811	1.45257	2.13	1.25782	0.747819	1.46653	1.37213	1.47787	1.18594	0.999803	1.38872	1.61452	1.50227	1.82564	2.06898
	1.85846	1.40866	2.12756	1.30461	0.848476	1.57323	1.39354	1.55051	1.25963	1.02843	1.44662	1.61574	1.53315	1.89703	2.17492
	1.81393	1.41975	2.08094	1.27049	0.854847	1.57402	1.4273	1.55006	1.20956	1.02467	1.41078	1.51784	1.49084	1.7312	2.06444
	1.7734	1.39443	2.15649	1.29803	0.899049	1.63578	1.51472	1.60842	1.19286	0.995926	1.33955	1.51876	1.4782	1.67627	1.93338
	1.83394	1.3649	2.10007	1.24734	0.839949	1.52319	1.48905	1.572	1.2316	1.01655	1.41075	1.57594	1.52051	1.82975	2.11071
	1.74633	1.33238	1.97343	1.13841	0.713222	1.3841	1.4301	1.5138	1.22372	1.02557	1.42293	1.54285	1.4589	1.76333	2.01851
	1.65034	1.26315	1.86464	1.06945	0.685681	1.28924	1.36291	1.4339	1.18804	0.998932	1.39371	1.55093	1.45542	1.6442	1.92424
	1.48072	1.08782	1.70802	0.948989	0.629031	1.19044	1.29528	1.39309	1.1635	0.973195	1.33922	1.41979	1.35006	1.50747	1.83923
	1.57488	1.09921	1.76056	1.04541	0.743703	1.36833	1.35778	1.49752	1.25419	1.0297	1.44257	1.48216	1.41356	1.73937	1.99316
	1.60668	1.22509	1.85541	1.13403	0.826816	1.47928	1.45249	1.5478	1.22201	1.03417	1.43167	1.48262	1.42439	1.67512	1.92936
	1.69022	1.35067	2.01207	1.30282	0.906694	1.59984	1.47762	1.53505	1.17707	0.988312	1.36621	1.48734	1.45633	1.58412	1.86975
	1.76903	1.34317	1.99002	1.21469	0.809958	1.49586	1.41641	1.45252	1.11001	0.946307	1.29798	1.45471	1.44391	1.67433	1.89222
	1.76757	1.28548	1.89392	1.1519	0.747133	1.36853	1.36485	1.37496	1.12123	0.955354	1.36948	1.61162	1.51907	1.8286	2.09237
	1.78744	1.30301	1.89222	1.10511	0.732726	1.29382	1.35077	1.47525	1.28163	1.01472	1.44574	1.60659	1.51022	1.82739	2.0964
	1.69983	1.28008	2.01917	1.11802	0.796824	1.44649	1.46618	1.60924	1.27865	1.03088	1.41483	1.53507	1.43551	1.72739	1.97752
	1.73381	1.32339	2.15849	1.24247	0.832598	1.52502	1.50599	1.60678	1.28744	1.05518	1.43653	1.53309	1.47487	1.80543	2.06674
	1.79239	1.43684	2.24384	1.31817	0.872685	1.63542	1.54487	1.66138	1.30227	1.05274	1.46251	1.56603	1.49924	1.88378	2.1648
	1.76837	1.38199	2.18236	1.29559	0.839655	1.58426	1.55231	1.61589	1.25283	1.04695	1.43842	1.52516	1.46178	1.72884	2.04006
	1.64081	1.30721	2.06334	1.20136	0.7783	1.45255	1.46947	1.50728	1.16681	0.984519	1.33604	1.48307	1.40804	1.61347	1.89268
	1.51892	1.19317	1.93496	1.08765	0.703421	1.36135	1.37666	1.41672	1.07951	0.947683	1.28077	1.39311	1.32296	1.46028	1.74611
	1.37382	1.00914	1.79067	0.980099	0.634421	1.23761	1.34074	1.34757	1.02537	0.89104	1.17725	1.24032	1.21344	1.34781	1.60499
	1.22901	0.887007	1.66315	0.890586	0.604332	1.1551	1.38561	1.44207	1.0593	0.882583	1.11564	1.11375	1.12421	1.21877	1.50629
	1.20055	0.860932	1.56034	0.846073	0.618936	1.09239	1.43917	1.59374	1.22233	0.956056	1.21423	1.16148	1.14192	1.37213	1.62321
	1.41151	0.896299	1.5694	0.8386	0.559149	1.04275	1.48571	1.6843	1.31019	1.0404	1.37998	1.3928	1.2942	1.67076	1.86912
	1.64343	1.2125	1.84377	1.11835	0.727335	1.36183	1.47374	1.64468	1.27626	1.05201	1.43319	1.5892	1.42635	1.82104	2.02449
	1.76772	1.38199	2.04919	1.28462	0.888268	1.59466	1.44704	1.56548	1.19409	1.03349	1.41372	1.64959	1.49955	1.8761	2.09243
	1.71933	1.29882	2.07663	1.28885	0.840929	1.59235	1.50874	1.62122	1.21282	1.0084	1.38392	1.56862	1.46556	1.76284	2.02012
	1.75571	1.30661	1.99355	1.17618	0.826032	1.46064	1.51559	1.64751	1.27491	1.05265	1.46258	1.64532	1.51605	1.88632	2.13784
	1.78919	1.38379	2.09406	1.29177	0.864256	1.60355	1.54298	1.67532	1.23096	1.04111	1.42715	1.54788	1.47623	1.76677	2.0484
	1.78009	1.32984	2.05698	1.2501	0.83054	1.51088	1.57545	1.65711	1.18502	1.00261	1.38301	1.49558	1.46193	1.66701	1.93528
	1.67916	1.25566	1.93639	1.16741	0.732334	1.40865	1.51726	1.53894	1.09927	0.975134	1.31884	1.48933	1.42348	1.5612	1.8052
	1.59111	1.19856	1.81215	1.05304	0.693031	1.31474	1.4293	1.49178	1.17902	0.995645	1.37805	1.50579	1.37913	1.68437	1.91981
	1.75091	1.26585	1.90237	1.07579	0.745467	1.32805	1.46786	1.61515	1.27507	1.05968	1.44186	1.61802	1.46526	1.80446	2.04058
	1.84187	1.34932	2.0095	1.23767	0.823875	1.51004	1.49153	1.6382	1.24711	1.06445	1.44567	1.63297	1.49977	1.81136	2.04098
	1.8947	1.42889	2.14856	1.3661	0.875135	1.68653	1.53527	1.63894	1.27407	1.06108	1.47716	1.65386	1.52134	1.93569	2.13508
	1.92483	1.46741	2.19875	1.33271	0.857787	1.62478	1.61045	1.68557	1.29893	1.07923	1.51221	1.63678	1.52089	1.94761	2.21331
	1.78577	1.33343	2.05202	1.20835	0.774674	1.4841	1.52955	1.57852	1.21477	1.04653	1.44746	1.52135	1.45428	1.74669	2.07369
	1.65405	1.28338	1.93221	1.13346	0.762521	1.37749	1.49051	1.48784	1.1462	1.00674	1.38173	1.54651	1.38382	1.66229	1.93102
	1.53617	1.18627	1.80539	1.06815	0.700382	1.28426	1.41506	1.41721	1.08014	0.959568	1.29589	1.46401	1.33999	1.50227	1.80675
	1.39739	1.08122	1.68084	0.974576	0.669607	1.18908	1.34802	1.32369	0.987432	0.903936	1.22338	1.32586	1.24357	1.4137	1.65454
	1.32004	1.02772	1.56365	0.9312	0.613349	1.13159	1.26572	1.23387	0.951676	0.863055	1.15815	1.31366	1.18513	1.30347	1.58769
	1.25913	0.93691	1.51333	0.86841	0.593159	1.06215	1.22862	1.17165	0.915404	0.829142	1.08682	1.20479	1.14404	1.25204	1.46353
	1.17319	0.923722	1.42271	0.813256	0.609821	1.01052	1.16433	1.12239	0.872728	0.809025	1.0333	1.1807	1.11073	1.18834	1.41013
	1.15602	0.887457	1.35519	0.803834	0.573851	0.956693	1.14233	1.07834	0.854472	0.78104	0.989607	1.16575	1.04511	1.13383	1.33379
	1.11694	0.89525	1.31162	0.763951	0.572675	0.933108	1.09589	1.04056	0.821819	0.757944	0.963322	1.13297	1.01991	1.07841	1.24269
	1.05807	0.788101	1.24902	0.739826	0.558855	0.897131	1.05684	0.997252	0.796047	0.728162	0.925496	1.12062	0.973812	1.04634	1.20153
	1.0382	0.808632	1.20563	0.728779	0.574537	0.873227	1.01483	0.959149	0.766695	0.70206	0.892462	1.09683	0.942628	0.99752	1.14669
	0.999563	0.788851	1.14577	0.703517	0.535235	0.842908	0.994553	0.925147	0.759098	0.701638	0.856492	1.0523	0.908265	0.981003	1.09427
	0.971838	0.749588	1.1124	0.702218	0.548368	0.822311	0.958688	0.914811	0.744024	0.688601	0.844277	1.08417	0.913942	0.947184	1.06576
	0.953427	0.703582	1.05934	0.678255	0.548466	0.786175	0.936307	0.871744	0.725848	0.67562	0.822479	1.00259	0.882304	0.915724	1.02523
	0.935744	0.719017	1.0491	0.678174	0.540821	0.780996	0.895157	0.868012	0.720081	0.665674	0.804022	1.03141	0.862398	0.895396	1.00069
	0.941712	0.679754	1.01817	0.646089	0.525434	0.760398	0.879247	0.849514	0.705007	0.644966	0.792887	1.0337	0.856645	0.88983	0.981319
	0.913477	0.658624	0.989109	0.649094	0.497501	0.746335	0.863283	0.821049	0.682456	0.644882	0.768525	0.985209	0.853391	0.845	0.95459
	0.929122	0.695939	0.964015	0.657217	0.522787	0.725976	0.866088	0.828104	0.700553	0.639403	0.780942	0.976822	0.825764	0.850142	0.922803
	0.878693	0.646336	0.941056	0.626919	0.533667	0.721673	0.809514	0.807924	0.680348	0.632688	0.750607	1.00854	0.817439	0.832355	0.90987
	0.8907	0.700285	0.913653	0.641053	0.539841	0.711554	0.80919	0.782946	0.679076	0.629064	0.75081	0.970265	0.791705	0.816867	0.908662
	0.854825	0.606324	0.886599	0.621314	0.508576	0.687809	0.786269	0.772077	0.658553	0.616251	0.730935	0.956389	0.796094	0.786315	0.860263
	0.82317	0.603776	0.86791	0.59719	0.499167	0.678247	0.771546	0.73869	0.630235	0.594617	0.714469	0.896615	0.749849	0.759514	0.828189
	0.851041	0.636895	0.85545	0.609455	0.496619	0.663625	0.757955	0.761372	0.630991	0.606586	0.71376	0.959744	0.774145	0.765987	0.835834
	0.851768	0.584595	0.861985	0.57802	0.490444	0.677689	0.750297	0.748247	0.638587	0.600152	0.698002	0.942513	0.775356	0.763325	0.82428
	0.83001	0.605725	0.825826	0.56811	0.495737	0.662271	0.727537	0.735163	0.629161	0.601669	0.690815	0.938853	0.750606	0.747051	0.792838
	0.809125	0.56871	0.821992	0.552189	0.466627	0.637809	0.723654	0.72052	0.616553	0.591947	0.688217	0.894175	0.719952	0.742453	0.798069
	0.855843	0.627754	0.832448	0.588742	0.518769	0.651992	0.743609	0.7286	0.62765	0.602428	0.688892	0.972858	0.766349	0.774941	0.786055
	0.83394	0.605425	0.798162	0.575664	0.501421	0.643825	0.724949	0.715147	0.624548	0.589784	0.682784	0.960201	0.743112	0.72515	0.79255
	0.830592	0.615016	0.79106	0.559906	0.513378	0.641474	0.710279	0.705754	0.621684	0.596021	0.691085	0.913388	0.738949	0.741666	0.786917
	0.811527	0.572906	0.778557	0.568922	0.487112	0.633825	0.710279	0.699397	0.620212	0.588182	0.67445	0.948765	0.731305	0.739549	0.767546
	0.801193	0.622359	0.780169	0.581512	0.485053	0.634064	0.710495	0.690374	0.600008	0.585991	0.676373	0.933974	0.728959	0.742876	0.766569
	0.793553	0.623408	0.770149	0.569897	0.507302	0.634821	0.699493	0.716213	0.613849	0.583406	0.672695	0.952577	0.731986	0.726178	0.765822
	0.829501	0.640342	0.757776	0.578751	0.519945	0.62741	0.705048	0.708051	0.615917	0.589531	0.672797	0.918115	0.734257	0.736826	0.748692
	0.803886	0.581897	0.73717	0.559093	0.4877	0.628606	0.682073	0.686477	0.604542	0.571184	0.667432	0.959286	0.683318	0.696049	0.716043
	0.778489	0.559568	0.755816	0.551539	0.492796	0.613227	0.682073	0.682171	0.600286	0.579332	0.660548	0.914456	0.708977	0.706455	0.72547
	0.780891	0.567211	0.741309	0.536268	0.443987	0.608884	0.678136	0.67368	0.606014	0.5736	0.65525	0.894175	0.68347	0.748503	0.715698
	0.790424	0.551176	0.736647	0.534319	0.483975	0.607928	0.679215	0.684631	0.595991	0.564946	0.655588	0.940683	0.675447	0.713957	0.718975
	0.809344	0.583695	0.746972	0.554707	0.504852	0.607092	0.673822	0.680571	0.615241	0.583827	0.663484	0.963403	0.728959	0.71311	0.742427
	0.810144	0.592237	0.756295	0.560718	0.506224	0.615498	0.675332	0.685944	0.602593	0.58335	0.676542	0.94907	0.697623	0.697622	0.739035
	0.811818	0.594036	0.743574	0.564536	0.515045	0.60761	0.678999	0.68459	0.609872	0.57596	0.653428	0.965233	0.690811	0.726178	0.711617
	0.800175	0.574854	0.746885	0.542767	0.494266	0.612709	0.68148	0.685575	0.612178	0.576297	0.650628	0.932296	0.710718	0.715107	0.72501
	0.77536	0.535291	0.722227	0.542604	0.462707	0.611992	0.677057	0.674542	0.617746	0.582703	0.667566	0.913388	0.672797	0.703733	0.71863
	0.806578	0.549228	0.725799	0.564048	0.487406	0.606375	0.67668	0.672778	0.602434	0.577955	0.653631	0.926959	0.684832	0.706939	0.709835
	0.793116	0.55747	0.728108	0.557388	0.497109	0.598685	0.673282	0.675813	0.608082	0.576775	0.651235	0.889296	0.681048	0.713776	0.712307
	0.800466	0.576352	0.71835	0.537649	0.508772	0.609243	0.662334	0.688938	0.612457	0.575005	0.652416	0.993443	0.686724	0.688789	0.739955
	0.80083	0.548779	0.725887	0.562343	0.470548	0.609841	0.665462	0.69263	0.60673	0.575876	0.663281	0.931229	0.693158	0.699498	0.736276
	0.802722	0.559868	0.704932	0.551783	0.486034	0.611673	0.658289	0.686477	0.619854	0.577281	0.676947	1.01845	0.720027	0.774639	0.805599
	1.16919	0.766672	0.925329	0.704979	0.553367	0.741594	0.737461	0.833313	0.869546	0.734512	0.945202	1.29521	0.956782	1.24962	1.27562
	1.48523	1.07927	1.31476	0.966778	0.709203	1.10765	0.930105	1.09458	1.06049	0.868843	1.14577	1.53705	1.19899	1.51872	1.52135
	1.62655	1.27859	1.56104	1.10373	0.810252	1.27789	1.08338	1.34917	1.1511	0.972156	1.24318	1.66667	1.33939	1.60881	1.70759
	1.49585	1.18418	1.53707	1.11088	0.780163	1.31753	1.1893	1.39966	1.13161	0.992105	1.26687	1.55108	1.29087	1.47347	1.5851
	1.43574	1.14596	1.4851	1.06287	0.739488	1.20382	1.17026	1.36237	1.05687	0.967323	1.23549	1.52592	1.25507	1.39857	1.51647
	1.5986	1.29042	1.63	1.11664	0.740861	1.26777	1.14605	1.3214	1.0533	0.967239	1.24673	1.64486	1.33666	1.56779	1.67638
	1.73592	1.41211	1.85584	1.2609	0.817015	1.41303	1.1934	1.38993	1.14139	1.017	1.35595	1.74886	1.47548	1.74245	1.87274
	1.75244	1.41675	1.92332	1.34554	0.936293	1.55167	1.2647	1.496	1.23271	1.08884	1.43812	1.7641	1.52339	1.79769	1.92407
	1.73883	1.50247	2.04757	1.4098	0.96305	1.60729	1.28444	1.46528	1.18264	1.06844	1.41261	1.77478	1.49743	1.72727	1.8317
	1.82695	1.50847	2.11758	1.43595	0.932667	1.61199	1.3484	1.5179	1.25665	1.07685	1.45077	1.80009	1.55926	1.83381	2.00391
	1.66359	1.32534	1.95007	1.26765	0.81035	1.43466	1.33497	1.51717	1.21358	1.06696	1.43461	1.67856	1.51605	1.66743	1.83785
	1.56476	1.18058	1.84634	1.21485	0.841909	1.50223	1.36328	1.6092	1.26373	1.06985	1.41618	1.64761	1.44679	1.61008	1.83543
	1.69721	1.30766	1.96009	1.3423	0.927374	1.68339	1.47552	1.67007	1.29722	1.10404	1.46474	1.70159	1.52922	1.74312	1.93464
	1.72915	1.30436	1.90712	1.27536	0.848182	1.56797	1.44515	1.60937	1.25128	1.08817	1.46977	1.72781	1.53368	1.77881	1.96775
	1.84391	1.36475	2.01625	1.225	0.808978	1.50924	1.44413	1.59751	1.30521	1.11736	1.51114	1.81824	1.61285	1.92982	2.12255
	1.80338	1.40776	2.10796	1.34904	0.878467	1.63625	1.43674	1.60916	1.27888	1.09216	1.50429	1.77081	1.62489	1.82449	2.05064
	1.82019	1.46186	2.07567	1.34327	0.965304	1.65829	1.46424	1.57024	1.22889	1.06569	1.44341	1.82235	1.60937	1.75806	2.00086
	1.9137	1.46786	2.19217	1.41662	0.911105	1.69952	1.50038	1.62836	1.28644	1.08881	1.48694	1.82906	1.64214	1.85456	2.1018
	1.85497	1.50727	2.17256	1.42547	0.92071	1.72291	1.47444	1.61138	1.24583	1.05948	1.43049	1.80451	1.60876	1.7459	1.98028
	1.74276	1.35396	2.03577	1.32524	0.86749	1.60936	1.45038	1.54801	1.17707	1.02821	1.36442	1.6932	1.54844	1.66592	1.91562
	1.79217	1.30106	1.92982	1.21014	0.79114	1.46195	1.51747	1.65629	1.28071	1.07409	1.42445	1.75389	1.60725	1.81197	2.03501
	1.89223	1.3703	2.04374	1.17375	0.732334	1.38896	1.49838	1.65715	1.24524	1.07176	1.41267	1.80756	1.60657	1.76889	2.00339
	1.97118	1.58894	2.27873	1.36187	0.885622	1.60968	1.4486	1.6138	1.22909	1.06687	1.44486	1.91156	1.6924	1.87458	2.12318
	2.01361	1.53454	2.28814	1.37056	0.880133	1.62936	1.47589	1.63578	1.27367	1.09165	1.48117	1.91522	1.67098	1.9156	2.15468
	1.86632	1.42799	2.19282	1.34481	0.898167	1.64789	1.47638	1.63664	1.26111	1.05878	1.47888	1.83654	1.59991	1.83453	2.08185
	1.74451	1.3664	2.0623	1.24872	0.875919	1.57892	1.46263	1.5677	1.22225	1.04431	1.41331	1.72461	1.57069	1.7122	1.98184
	1.76721	1.28683	2.03359	1.16465	0.824463	1.49359	1.51402	1.61851	1.24066	1.04414	1.41082	1.7516	1.5249	1.77924	2.0065
	1.88874	1.45497	2.17753	1.30672	0.892875	1.60199	1.52395	1.67384	1.33564	1.09073	1.47948	1.85117	1.61293	1.87204	2.09933
	1.82208	1.39727	2.12381	1.29754	0.856415	1.62	1.48894	1.61794	1.25224	1.06302	1.44044	1.75572	1.55631	1.74409	1.97724
	1.74072	1.45482	2.07877	1.2674	0.881015	1.57813	1.45114	1.52857	1.20531	1.04119	1.36483	1.78606	1.5059	1.62188	1.86693
	1.74298	1.35576	1.97634	1.21404	0.856611	1.4851	1.4211	1.45765	1.12119	0.985811	1.34097	1.7269	1.47926	1.66169	1.86118
	1.88422	1.43189	2.10765	1.25563	0.903852	1.58944	1.47627	1.54251	1.21779	1.03891	1.38676	1.77036	1.53179	1.74342	1.92217
	1.82572	1.45437	2.1303	1.30647	0.945898	1.62323	1.49196	1.5307	1.19234	1.03096	1.35808	1.71592	1.5196	1.66616	1.83376
	1.75258	1.39697	2.00937	1.22939	0.86798	1.5561	1.54827	1.65896	1.26317	1.05521	1.41051	1.68512	1.4555	1.71668	1.90694
	1.79799	1.3144	1.99355	1.19186	0.849946	1.50841	1.54627	1.64407	1.2907	1.09393	1.46231	1.75038	1.51105	1.80223	1.98758
	1.86159	1.37554	2.12259	1.1943	0.791826	1.42972	1.53549	1.59399	1.23394	1.08662	1.44922	1.79963	1.55669	1.78541	1.96925
	1.8808	1.44448	2.12908	1.16684	0.780947	1.36072	1.4774	1.50162	1.16581	1.02481	1.40043	1.74154	1.54102	1.7727	1.97155
	1.83336	1.4199	2.08961	1.12006	0.719298	1.28733	1.42201	1.44584	1.10743	0.992133	1.3463	1.74123	1.48456	1.67276	1.87722
	1.73097	1.28743	1.99795	1.03249	0.712438	1.22355	1.3594	1.35035	1.04562	0.953303	1.27963	1.6383	1.38957	1.5497	1.74001
	1.60501	1.27409	1.8832	0.995126	0.690679	1.1698	1.31464	1.27136	1.01623	0.928184	1.21474	1.57716	1.36035	1.45381	1.63827
	1.47388	1.18702	1.73264	0.926895	0.649221	1.11056	1.25202	1.21148	0.960705	0.875671	1.15687	1.4968	1.27838	1.3754	1.53935
	1.42468	1.06714	1.65161	0.85517	0.60051	1.05402	1.21411	1.15688	0.935052	0.846197	1.09026	1.46645	1.2083	1.29966	1.46267
	1.31167	1.03776	1.54139	0.839574	0.620504	1.01574	1.14562	1.11603	0.894006	0.824534	1.05574	1.41598	1.16561	1.24466	1.39064
	1.23716	0.996703	1.47887	0.793762	0.579829	0.974382	1.12172	1.06083	0.873325	0.79728	1.01879	1.35209	1.11406	1.17321	1.32063
	1.18185	0.957141	1.40668	0.776623	0.561404	0.936335	1.07437	1.01345	0.848347	0.775505	0.967674	1.2853	1.09529	1.13812	1.2424
	1.19706	0.909936	1.37279	0.768175	0.605312	0.917849	1.06332	1.00615	0.84274	0.752381	0.974862	1.3771	1.06615	1.11682	1.22464
	1.15041	0.876817	1.2884	0.728617	0.568166	0.878048	1.01181	0.960256	0.812353	0.733921	0.914563	1.24138	1.02906	1.06685	1.1521
	1.12851	0.859134	1.2424	0.714321	0.55023	0.847689	0.971416	0.944916	0.809887	0.723048	0.895229	1.26441	1.01688	1.03987	1.11128
	1.11556	0.858534	1.22327	0.760702	0.559933	0.833745	0.971524	0.915836	0.793302	0.710657	0.888716	1.29292	0.983576	1.03104	1.10548
	1.05792	0.81043	1.14677	0.666883	0.566892	0.819482	0.948495	0.89701	0.785308	0.70515	0.869112	1.25633	0.938919	0.967451	1.07294
	1.02598	0.765473	1.13135	0.684916	0.555425	0.800797	0.911229	0.863377	0.767927	0.69363	0.855109	1.1964	0.96647	0.959405	1.03868
	1.01237	0.754233	1.07288	0.660954	0.527296	0.784582	0.887337	0.843936	0.762797	0.680116	0.83132	1.15493	0.909779	0.924254	0.98494
	0.988502	0.719467	1.06047	0.641053	0.51377	0.778287	0.876173	0.843608	0.73949	0.658706	0.810669	1.17444	0.894263	0.920382	0.974191
	0.979406	0.776562	1.02801	0.650638	0.548564	0.749044	0.864254	0.831836	0.752138	0.667275	0.806452	1.19091	0.917424	0.929699	0.9708
	0.990394	0.729807	0.99939	0.644058	0.522885	0.762311	0.836587	0.822403	0.753689	0.655222	0.800108	1.24108	0.90274	0.901022	0.945795
	0.955829	0.696239	0.970027	0.620096	0.531608	0.74243	0.824399	0.794061	0.7412	0.651063	0.779187	1.13754	0.853012	0.871015	0.912974
	0.943822	0.678705	0.957916	0.608643	0.536313	0.744303	0.824129	0.799639	0.740047	0.645051	0.761034	1.17963	0.863457	0.866054	0.905386
	0.930505	0.666417	0.938834	0.63163	0.537293	0.724741	0.794952	0.792584	0.738496	0.636256	0.76758	1.13388	0.855132	0.857584	0.902052
	0.927303	0.623558	0.917487	0.603525	0.493678	0.731076	0.787887	0.757844	0.72211	0.634402	0.745647	1.10659	0.83409	0.827213	0.882164
	0.907146	0.67376	0.896576	0.606937	0.480153	0.694781	0.780768	0.771379	0.734717	0.629176	0.750742	1.13693	0.809491	0.847238	0.873656
	0.891937	0.704181	0.890956	0.593697	0.521905	0.699602	0.76777	0.775153	0.721036	0.622095	0.736773	1.09927	0.800182	0.812995	0.856412
	0.919007	0.655028	0.862682	0.605881	0.500833	0.682789	0.747924	0.762274	0.735672	0.618864	0.73404	1.13251	0.809037	0.817714	0.837098
	0.878038	0.628803	0.859589	0.588904	0.480251	0.690797	0.744202	0.761125	0.720996	0.613751	0.734377	1.0892	0.805707	0.820558	0.839628
	0.896231	0.640042	0.865122	0.61904	0.490248	0.690359	0.76173	0.75485	0.7307	0.62114	0.722162	1.15066	0.822586	0.806098	0.828764
	0.896594	0.661172	0.844864	0.597514	0.498775	0.69498	0.736113	0.762561	0.734041	0.613104	0.727156	1.1075	0.813957	0.809002	0.826464
	0.879494	0.660572	0.816895	0.585087	0.497207	0.689602	0.72991	0.75485	0.724536	0.609536	0.712174	1.13236	0.80654	0.811241	0.793585
	0.871125	0.655327	0.821425	0.576233	0.506028	0.678008	0.751267	0.748944	0.735473	0.61538	0.7198	1.11452	0.791705	0.818077	0.818877
	0.877674	0.609471	0.815588	0.598002	0.502695	0.667052	0.727268	0.733358	0.729905	0.614818	0.695303	1.10049	0.802755	0.804525	0.782664
	0.872871	0.669564	0.808269	0.60783	0.501421	0.673944	0.719933	0.744678	0.730541	0.610857	0.719024	1.13159	0.783152	0.789461	0.798988
	0.889099	0.634497	0.804653	0.589798	0.504263	0.666255	0.721227	0.729872	0.723502	0.60268	0.708496	1.1197	0.795489	0.776454	0.801632
	0.863411	0.612318	0.799294	0.595565	0.482113	0.654781	0.714486	0.738485	0.730183	0.609733	0.69726	1.1072	0.787542	0.810273	0.797379
	0.881313	0.625206	0.805829	0.610511	0.496717	0.670279	0.715565	0.737131	0.732888	0.606895	0.70492	1.14135	0.806464	0.806703	0.817957
	0.870979	0.592387	0.80169	0.611486	0.509164	0.663068	0.718801	0.748493	0.740564	0.602175	0.716156	1.10674	0.769225	0.788553	0.804449
	0.878475	0.62071	0.810665	0.592641	0.528178	0.656056	0.728346	0.739059	0.749911	0.615717	0.719294	1.12397	0.801847	0.798657	0.799851
	0.899869	0.62116	0.800558	0.620258	0.524748	0.66243	0.722468	0.75485	0.745178	0.596724	0.726313	1.11772	0.78845	0.799504	0.795884
	0.87913	0.613967	0.782434	0.604662	0.51034	0.657371	0.721875	0.73221	0.749632	0.612318	0.706506	1.09851	0.793294	0.775486	0.776743
	0.865522	0.614117	0.794197	0.590285	0.512104	0.660797	0.719502	0.745129	0.762837	0.592313	0.714671	1.11848	0.819785	0.795995	0.808703
	0.911876	0.61022	0.791801	0.591585	0.527982	0.670239	0.7284	0.738649	0.80066	0.626057	0.789614	1.20692	0.866409	0.961099	0.987527
	1.3204	0.866777	1.07393	0.78044	0.612565	0.85761	0.82359	0.946844	1.0383	0.783485	1.06705	1.5186	1.10596	1.44909	1.4391
	1.54133	1.08017	1.43038	1.04329	0.780163	1.1712	1.03328	1.20188	1.1993	0.919024	1.25007	1.69	1.32198	1.65733	1.68144
	1.69233	1.27454	1.62969	1.16432	0.809958	1.3041	1.15306	1.35577	1.25824	1.00798	1.35619	1.74657	1.42953	1.73906	1.84785
	1.6093	1.24322	1.62943	1.19292	0.800549	1.32024	1.21885	1.38329	1.24142	1.01486	1.35896	1.67109	1.39759	1.59399	1.7157
	1.71576	1.3174	1.74993	1.17895	0.829756	1.35761	1.23094	1.39572	1.21171	1.01961	1.34448	1.70281	1.45633	1.64384	1.75996
	1.77019	1.36026	1.78374	1.22971	0.817995	1.36876	1.25946	1.41352	1.25351	1.05515	1.37593	1.77478	1.48842	1.6511	1.77985
	1.73425	1.28578	1.71373	1.12127	0.739194	1.25948	1.23832	1.34121	1.23474	1.03869	1.374	1.74413	1.47215	1.64723	1.80135
	1.84114	1.37165	1.7458	1.19259	0.814956	1.43669	1.30223	1.47644	1.32224	1.10165	1.442	1.81869	1.52626	1.71499	1.85383
	1.91639	1.44328	1.95796	1.33109	0.947956	1.6141	1.36269	1.55121	1.37418	1.13405	1.50952	1.84126	1.57425	1.86757	2.03265
	1.89092	1.42904	2.00823	1.33945	0.926688	1.66092	1.38529	1.56212	1.36384	1.13888	1.49352	1.83379	1.57675	1.79575	1.9558
	1.85693	1.45632	2.07698	1.40143	0.966284	1.72873	1.39645	1.57397	1.34662	1.10354	1.45229	1.80909	1.56388	1.74995	1.89148
	1.88117	1.34452	2.04522	1.32004	0.911595	1.61307	1.4253	1.64755	1.41057	1.12992	1.51771	1.81397	1.53209	1.72842	1.92872
	1.72398	1.28533	1.94149	1.21737	0.853474	1.52709	1.46586	1.68804	1.36276	1.10536	1.44895	1.7824	1.51029	1.59822	1.82066
	1.68251	1.2666	1.9025	1.27853	0.9212	1.69434	1.51354	1.75452	1.39876	1.11711	1.46697	1.72049	1.50386	1.67808	1.90194
	1.80098	1.33853	2.06504	1.37414	0.95766	1.76446	1.58111	1.81658	1.44374	1.15495	1.52622	1.87801	1.57289	1.7773	1.98287
	1.84464	1.42245	2.10177	1.39615	0.964716	1.70574	1.60317	1.81719	1.46605	1.18024	1.5822	1.87145	1.61823	1.92419	2.1391
	1.94142	1.4779	2.2173	1.33133	0.857395	1.62044	1.5384	1.73369	1.46005	1.16125	1.58358	1.91019	1.64858	1.97029	2.24964
	1.95335	1.4731	2.16803	1.27902	0.856023	1.51956	1.48231	1.66798	1.42895	1.16341	1.6043	1.95822	1.67658	1.97392	2.2432
	1.79421	1.33778	2.06169	1.25457	0.869744	1.61139	1.51073	1.71523	1.45965	1.14849	1.54208	1.84416	1.60581	1.87174	2.16348
	1.85708	1.42859	2.23307	1.35391	0.918847	1.68737	1.4931	1.69796	1.45353	1.14464	1.56431	1.81991	1.62754	1.96322	2.25389
3	1.90416	1.51581	2.29446	1.41118	0.987749	1.7502	1.51391	1.7567	1.50034	1.17075	1.60022	1.95974	1.67567	2.01688	2.29356
	1.82674	1.35711	2.16607	1.30477	0.887288	1.6245	1.50081	1.72909	1.44931	1.15074	1.56104	1.8556	1.59204	1.84984	2.18687
	1.72988	1.39502	2.063	1.22655	0.872194	1.51729	1.45141	1.6211	1.40504	1.11893	1.49129	1.74809	1.5959	1.75867	2.08162
	1.64394	1.25116	1.94833	1.10657	0.807606	1.41777	1.38944	1.53693	1.31937	1.06437	1.41068	1.73757	1.55677	1.70168	1.98965
	1.58529	1.23468	1.83685	1.09447	0.748211	1.34773	1.35239	1.47024	1.27686	1.02908	1.35676	1.73894	1.51446	1.60542	1.86958
	1.52358	1.16949	1.75516	1.00634	0.71773	1.26418	1.29096	1.3892	1.23215	0.985867	1.28675	1.65676	1.45504	1.54462	1.76237
	1.39216	1.0514	1.64072	0.928113	0.66353	1.20394	1.24943	1.31767	1.16943	0.941614	1.24177	1.5799	1.36361	1.42138	1.66046
	1.36741	0.980818	1.58465	0.893347	0.635695	1.14092	1.20704	1.27095	1.14302	0.906549	1.17965	1.56999	1.32016	1.40123	1.54498
	1.29006	0.955642	1.52675	0.866542	0.641282	1.07928	1.14772	1.202	1.10492	0.87834	1.13565	1.54727	1.30904	1.33837	1.50687
	1.27798	0.95744	1.4343	0.860288	0.601784	1.06159	1.12383	1.16845	1.08137	0.856143	1.10059	1.4541	1.26748	1.25113	1.42024
	1.19924	0.909036	1.39191	0.798554	0.604626	1.00641	1.08683	1.11509	1.0603	0.819308	1.05365	1.40256	1.21814	1.22923	1.33092
	1.17254	0.860033	1.32387	0.792543	0.599432	0.980837	1.05808	1.08527	1.04411	0.789694	1.02264	1.37725	1.2033	1.19844	1.30465
	1.12764	0.859733	1.2796	0.758103	0.563952	0.938964	1.03133	1.05619	1.00672	0.780675	0.999426	1.37191	1.17946	1.13564	1.22119
	1.11869	0.854189	1.2705	0.754853	0.601882	0.943307	1.01613	1.04709	1.00644	0.778034	0.970813	1.38411	1.14555	1.11652	1.20084
	1.08318	0.75783	1.20881	0.709041	0.562188	0.900598	0.990131	1.00886	0.979557	0.748082	0.93238	1.3405	1.09446	1.07817	1.15802
	1.06222	0.81073	1.16546	0.699131	0.539547	0.882191	0.958796	0.995324	0.96325	0.733809	0.923843	1.33867	1.0875	1.04441	1.15267
	1.02773	0.753784	1.10987	0.681748	0.531706	0.854064	0.941916	0.967762	0.956529	0.711219	0.889526	1.27081	1.04753	1.03455	1.05576
	1.03624	0.754683	1.10355	0.695719	0.54925	0.832749	0.937925	0.94102	0.950563	0.71622	0.892631	1.27478	1.06146	1.04199	1.08134
	1.03748	0.748689	1.09105	0.668995	0.564736	0.83243	0.918563	0.931258	0.946148	0.696693	0.87387	1.28378	1.03383	1.0216	1.06398
	0.97766	0.718717	1.06199	0.658923	0.517397	0.79749	0.932262	0.919774	0.946745	0.691186	0.845998	1.23224	1.0224	0.985783	1.04604
	0.984864	0.739098	1.03076	0.675737	0.552779	0.796454	0.892514	0.903326	0.929881	0.682644	0.851633	1.2853	1.01877	0.97217	0.989941
	0.991923	0.690544	1.03328	0.646008	0.546604	0.799283	0.908316	0.87802	0.921728	0.675424	0.837461	1.29841	1.02218	0.967028	1.00581
	0.980571	0.756931	1.00514	0.669726	0.540821	0.782869	0.906267	0.901727	0.945154	0.681268	0.817654	1.25831	1.00916	0.988445	0.988216
	0.94615	0.690994	0.970114	0.64284	0.556895	0.778566	0.871481	0.868586	0.91604	0.666152	0.810062	1.23102	0.988874	0.942525	0.951946
	0.947388	0.713772	0.978261	0.662903	0.53151	0.775378	0.890519	0.878102	0.90916	0.658762	0.802605	1.21988	0.982819	0.949604	0.942519
	0.950444	0.67406	0.949028	0.587442	0.525434	0.750916	0.847589	0.862024	0.898182	0.644798	0.784586	1.20082	0.957387	0.888983	0.912686
	0.934435	0.707328	0.949421	0.64349	0.519259	0.767968	0.855355	0.863377	0.900768	0.64373	0.783034	1.19061	0.957009	0.913183	0.922458
	0.969728	0.708377	0.924545	0.609861	0.563756	0.766414	0.862528	0.86108	0.913097	0.645809	0.788973	1.22736	1.00114	0.899086	0.894809
	0.936618	0.672111	0.915701	0.618309	0.522493	0.768127	0.850933	0.862803	0.917591	0.633222	0.780841	1.18801	0.955949	0.896727	0.889349
	0.928249	0.65308	0.902849	0.631468	0.523277	0.763307	0.855949	0.859194	0.908046	0.629429	0.768154	1.1935	0.967378	0.905439	0.898086
	0.932688	0.620261	0.890215	0.609211	0.507302	0.76008	0.848021	0.845248	0.906097	0.638167	0.766635	1.19472	0.92908	0.883538	0.89205
	0.899869	0.552975	0.873225	0.580538	0.466627	0.747371	0.827904	0.832657	0.886688	0.623528	0.761304	1.1659	0.921511	0.863573	0.876128
	0.933561	0.662371	0.898275	0.628625	0.540919	0.75498	0.843383	0.855051	0.901802	0.627012	0.769874	1.18634	0.931804	0.898905	0.874806
	0.920754	0.659973	0.871395	0.627894	0.512594	0.761873	0.837234	0.871908	0.913137	0.636987	0.779997	1.17094	0.937632	0.902958	0.861183
	0.906273	0.654428	0.881241	0.614654	0.530922	0.751952	0.834754	0.872729	0.90208	0.630468	0.776387	1.17948	0.940887	0.874887	0.872564
	0.923228	0.665967	0.871918	0.599383	0.50838	0.747371	0.85034	0.878389	0.900728	0.622236	0.77858	1.20738	0.931804	0.874221	0.860148
	0.899869	0.639293	0.865514	0.613679	0.526512	0.753466	0.840956	0.87843	0.901762	0.62527	0.774531	1.19732	0.907206	0.895638	0.852561
	0.909402	0.63135	0.862638	0.623507	0.528962	0.758008	0.848506	0.89016	0.902239	0.622152	0.764881	1.17078	0.934756	0.88257	0.850377
	0.89543	0.606624	0.849002	0.599951	0.505244	0.747689	0.835401	0.905377	0.906415	0.621618	0.748988	1.13373	0.934378	0.868897	0.830948
	0.905108	0.636445	0.853838	0.609049	0.520827	0.764064	0.850663	0.915918	0.891342	0.613189	0.766669	1.18908	0.932486	0.884022	0.842674
	0.942366	0.658025	0.921539	0.692226	0.568166	0.902908	0.916136	1.03802	0.986438	0.643365	0.798826	1.16499	0.963972	0.948152	0.923263
	1.16046	0.839502	1.22332	0.950207	0.773106	1.28108	1.08343	1.33042	1.19405	0.769043	0.961736	1.3437	1.07304	1.16299	1.12859
	1.32259	1.01933	1.42764	1.08098	0.83299	1.41295	1.2435	1.52865	1.32792	0.898626	1.14347	1.49268	1.23993	1.30377	1.32569
	1.47424	1.11015	1.63684	1.19178	0.88866	1.53821	1.36868	1.66203	1.40687	1.00503	1.27878	1.63327	1.35876	1.45096	1.49112
	1.37076	0.970778	1.55968	1.06774	0.775164	1.40008	1.4149	1.69193	1.37398	1.00093	1.28624	1.52836	1.31169	1.34684	1.42571
	1.48465	1.11914	1.56047	1.04524	0.778497	1.3339	1.42482	1.6624	1.37669	1.02225	1.36007	1.69579	1.42583	1.51721	1.60068
	1.67072	1.23348	1.76906	1.22159	0.843575	1.52916	1.43782	1.75124	1.43535	1.06313	1.4448	1.72903	1.51506	1.62702	1.73507
	1.78336	1.36056	1.96044	1.34327	0.940606	1.68394	1.5384	1.82458	1.49513	1.11733	1.50898	1.89296	1.63601	1.75679	1.85923
	1.85119	1.39248	2.06831	1.36455	0.93943	1.70422	1.59853	1.89783	1.51219	1.12551	1.55952	1.83379	1.62791	1.8136	1.94924
	1.85293	1.40911	2.08844	1.39444	0.9458	1.72582	1.61714	1.87215	1.51386	1.13349	1.57697	1.84492	1.66462	1.83629	1.98362
	1.84573	1.46561	2.14695	1.47445	0.990395	1.82542	1.63327	1.861	1.48538	1.11014	1.52176	1.82251	1.65675	1.74753	1.9024
	1.88575	1.50262	2.1957	1.45772	0.967853	1.77737	1.63925	1.88372	1.50022	1.11315	1.55608	1.92909	1.69119	1.87301	2.06708
	1.87629	1.4238	2.16002	1.47015	0.965206	1.81645	1.63105	1.88401	1.5205	1.11972	1.55449	1.88228	1.65978	1.8326	1.96781
	1.91108	1.56361	2.26	1.48128	0.990493	1.83331	1.67684	1.87699	1.46053	1.08974	1.50442	1.83394	1.71473	1.85129	1.99488
	1.98239	1.54728	2.23186	1.47908	0.956091	1.75056	1.63192	1.82757	1.45985	1.09865	1.57147	1.94694	1.76378	2.01585	2.16238
	1.84951	1.41585	2.10007	1.32637	0.876115	1.6655	1.62507	1.8496	1.50941	1.13534	1.58372	1.87618	1.72275	1.93061	2.16221
	1.84908	1.37749	2.0897	1.38291	0.963736	1.78916	1.64804	1.84627	1.51151	1.11553	1.56269	1.91857	1.68445	1.92226	2.12899
	1.88561	1.39727	2.19143	1.42629	0.977556	1.84343	1.68299	1.8863	1.53319	1.1318	1.59306	1.92056	1.72987	1.97731	2.22878
	1.84173	1.46201	2.09349	1.36975	0.976183	1.76239	1.68116	1.89389	1.51883	1.13902	1.57491	1.87054	1.73108	1.90435	2.15336
	1.80731	1.45737	2.06805	1.32353	0.897187	1.66809	1.63429	1.83327	1.4445	1.1048	1.49285	1.89128	1.73108	1.82219	2.01115
	1.93916	1.55837	2.19391	1.45098	0.953445	1.79414	1.60064	1.74808	1.40568	1.07173	1.45414	1.95181	1.77331	1.91663	2.10582
	1.96114	1.52525	2.18846	1.4591	0.997256	1.82633	1.6001	1.79685	1.476	1.11663	1.55784	1.92238	1.82531	2.00121	2.15991
	1.94528	1.56242	2.28387	1.495	1.02039	1.85817	1.60867	1.81826	1.47429	1.11916	1.54039	1.96478	1.8649	1.94966	2.14146
	2.01579	1.56182	2.37322	1.45967	0.978242	1.80378	1.64437	1.86834	1.51279	1.14768	1.58793	2.01586	1.92545	2.08198	2.27378
	1.98232	1.54758	2.4347	1.5197	0.99951	1.88347	1.67005	1.89455	1.5143	1.14543	1.61462	1.97027	1.95883	2.01107	2.25619
	1.93349	1.52525	2.34709	1.4868	1.00431	1.80673	1.66562	1.83323	1.4583	1.11301	1.56172	1.90226	1.95368	1.89945	2.14071
	1.80228	1.39338	2.23952	1.34197	0.908262	1.7094	1.65295	1.84681	1.43551	1.07468	1.47871	1.79323	1.90297	1.80918	1.99109
	1.7202	1.29522	2.11571	1.2159	0.83348	1.62737	1.7057	1.90169	1.49374	1.12169	1.57211	1.82632	1.91629	1.92087	2.11588
	1.84384	1.29507	2.12956	1.21777	0.859551	1.6061	1.6927	1.91219	1.53049	1.12113	1.57869	1.84843	1.95459	1.9905	2.19337
	1.95954	1.49033	2.28823	1.3825	0.923258	1.76673	1.73131	1.93347	1.56159	1.15546	1.61763	1.98368	2.05397	2.14169	2.29994
	1.91668	1.39742	2.25669	1.32621	0.89111	1.73721	1.75844	1.94881	1.52524	1.16723	1.64587	1.8771	2.03232	2.12542	2.27798
	1.93174	1.49033	2.38076	1.4085	0.965206	1.83279	1.76518	1.93306	1.4822	1.14692	1.59458	1.91141	2.00462	2.05796	2.23205
	1.93807	1.53184	2.45988	1.44862	1.01186	1.89904	1.74275	1.86088	1.44915	1.10503	1.53033	1.84081	1.99932	1.968	2.10806
	1.81531	1.37404	2.36255	1.36163	0.914633	1.78131	1.6797	1.80181	1.37374	1.04248	1.43835	1.75267	1.89661	1.82147	1.96994
	1.70346	1.25341	2.21613	1.23719	0.840145	1.65841	1.71001	1.87531	1.46808	1.07482	1.41672	1.7118	1.84908	1.79563	1.94016
	1.64299	1.2077	2.10207	1.13979	0.763501	1.57394	1.71583	1.92199	1.51664	1.11416	1.49551	1.74093	1.85998	1.92153	2.05466
	1.78155	1.25761	2.04753	1.12802	0.772224	1.54857	1.67619	1.89008	1.49529	1.11346	1.52784	1.84294	1.88056	1.99322	2.15261
	1.95124	1.41585	2.27189	1.25392	0.836029	1.64988	1.66217	1.88003	1.54564	1.14141	1.58264	1.93397	1.96208	2.11192	2.23596
	1.90998	1.42245	2.29524	1.33027	0.911105	1.74012	1.6969	1.96108	1.51593	1.13633	1.56563	1.90424	1.94407	2.02003	2.19877
	1.85999	1.41945	2.38821	1.3574	0.962364	1.84745	1.70758	1.99836	1.48236	1.1041	1.50408	1.78744	1.87496	1.94071	2.06001
	1.85009	1.46816	2.43426	1.34351	0.931589	1.77976	1.70543	1.97609	1.4295	1.06055	1.43565	1.73391	1.81161	1.84978	1.96643
	1.90511	1.46261	2.3856	1.29445	0.898363	1.76219	1.74997	2.01661	1.45026	1.07316	1.44446	1.7728	1.80692	1.9222	2.0215
	1.97009	1.4689	2.48331	1.35017	0.967755	1.90677	1.80628	2.09093	1.48868	1.11688	1.48991	1.76365	1.80397	1.95348	2.06812
	1.9289	1.47939	2.44589	1.34368	0.944134	1.8561	1.80881	2.07662	1.45651	1.09359	1.44605	1.7484	1.77225	1.87809	1.95447
	1.82179	1.36026	2.36412	1.25051	0.896109	1.74307	1.76815	2.01107	1.39407	1.06389	1.39749	1.6903	1.73486	1.78414	1.89056
	1.70979	1.33298	2.24628	1.14597	0.793198	1.70127	1.70618	1.94627	1.35234	1.03006	1.35312	1.75496	1.69096	1.72575	1.83135
	1.6101	1.3129	2.14529	1.10357	0.797217	1.60773	1.66401	1.92375	1.34153	1.00728	1.2777	1.65294	1.67091	1.66513	1.76122
	1.52052	1.16814	2.04892	1.0437	0.726061	1.54562	1.58548	1.83594	1.29006	0.957742	1.23701	1.6014	1.58053	1.61631	1.69455
	1.43909	1.08991	1.97295	0.964585	0.699598	1.50016	1.54266	1.77466	1.24933	0.92234	1.1921	1.55169	1.50999	1.54988	1.59407
	1.40409	1.09336	1.91845	0.92722	0.673527	1.4547	1.5226	1.75772	1.23808	0.915625	1.13976	1.54193	1.50545	1.52459	1.56556
	1.34849	1.03012	1.84443	0.903745	0.688033	1.39554	1.49186	1.71191	1.209	0.875277	1.11516	1.54392	1.45375	1.45484	1.4852
	1.27922	0.982167	1.78034	0.891235	0.673723	1.37725	1.46608	1.64604	1.18009	0.857464	1.08051	1.45441	1.4253	1.41412	1.43611
	1.25782	0.964034	1.71221	0.837138	0.649319	1.34076	1.44979	1.63947	1.17472	0.833975	1.04181	1.46295	1.35929	1.36469	1.38645
	1.20325	0.858534	1.6584	0.81415	0.625894	1.31303	1.39133	1.59321	1.1464	0.80717	1.01687	1.43062	1.35755	1.35084	1.36851
	1.19677	0.896898	1.60948	0.8148	0.612369	1.27924	1.38124	1.57508	1.13256	0.801326	1.00192	1.3774	1.31101	1.32053	1.31178
	1.16351	0.85224	1.5623	0.780197	0.608056	1.26394	1.37876	1.55666	1.1289	0.780563	0.977325	1.46142	1.28186	1.27781	1.29051
	1.13179	0.841301	1.51956	0.784502	0.607664	1.25406	1.33492	1.49965	1.12214	0.765109	0.953671	1.34187	1.30563	1.27963	1.26487
	1.1184	0.881463	1.50283	0.751767	0.596393	1.22438	1.34139	1.49658	1.10751	0.758422	0.933392	1.34385	1.2578	1.24018	1.24401
	1.0863	0.8419	1.46401	0.73016	0.601392	1.2151	1.30978	1.47599	1.0768	0.750049	0.928634	1.38655	1.24871	1.21617	1.22464
	1.09009	0.839353	1.43561	0.743319	0.636087	1.20291	1.30876	1.44719	1.06805	0.731533	0.907849	1.33532	1.18983	1.19662	1.17796
	1.03369	0.75738	1.39536	0.71099	0.582476	1.19709	1.31615	1.44715	1.0737	0.738473	0.894891	1.31366	1.18589	1.15796	1.18934
	1.02627	0.796793	1.37749	0.725774	0.562972	1.16801	1.26928	1.43727	1.06216	0.710854	0.88379	1.29704	1.16629	1.14623	1.14939
	1.04432	0.76877	1.35641	0.743563	0.594041	1.18024	1.27672	1.4239	1.0624	0.725436	0.883925	1.33638	1.19157	1.15688	1.16813
	1.02838	0.760228	1.36037	0.691089	0.590513	1.16789	1.2579	1.42435	1.05135	0.701469	0.87721	1.30711	1.20565	1.1354	1.15991
	1.02918	0.751986	1.32665	0.682642	0.59953	1.15458	1.26831	1.43481	1.05735	0.698182	0.866244	1.32068	1.14502	1.14968	1.14198
	1.00488	0.729207	1.29298	0.698075	0.596197	1.14347	1.24663	1.42033	1.03949	0.696805	0.851734	1.31595	1.18044	1.09069	1.11422
	0.987629	0.734003	1.28579	0.687028	0.58326	1.11438	1.2401	1.41459	1.02522	0.694614	0.851363	1.26654	1.1569	1.10279	1.11071
	0.996143	0.735801	1.26061	0.680205	0.553073	1.11211	1.23331	1.41016	1.03687	0.683094	0.842286	1.29353	1.13283	1.10418	1.09502
	0.974385	0.660423	1.25198	0.667289	0.533275	1.09853	1.20548	1.38702	1.0064	0.671069	0.816709	1.25618	1.08485	1.08754	1.06674
	0.96216	0.706429	1.22833	0.678986	0.555523	1.1045	1.21767	1.41446	1.01921	0.663735	0.824234	1.25831	1.12004	1.07187	1.08904
	0.97977	0.741496	1.23408	0.687109	0.573753	1.10311	1.21287	1.40609	1.02673	0.679132	0.828891	1.25923	1.11913	1.10352	1.10157
	0.95692	0.688146	1.20519	0.670701	0.546898	1.09853	1.18358	1.39445	1.01468	0.654323	0.822783	1.19122	1.10233	1.087	1.0565
	0.968127	0.699985	1.19482	0.683616	0.594531	1.10283	1.18693	1.39043	1.0109	0.661403	0.818565	1.22309	1.09688	1.0916	1.06645
	0.938437	0.687247	1.20724	0.686947	0.555915	1.08805	1.15975	1.38567	1.01197	0.658622	0.806249	1.19838	1.07448	1.10206	1.0584
	0.944913	0.695789	1.19517	0.662253	0.556405	1.10729	1.17026	1.3967	1.00787	0.647776	0.799298	1.17917	1.08568	1.07187	1.04369
	0.956411	0.678256	1.19177	0.648444	0.568068	1.08896	1.17862	1.41057	1.0146	0.651738	0.817452	1.24154	1.07781	1.09474	1.0392
	0.937418	0.658624	1.1821	0.640647	0.559639	1.09052	1.17463	1.37459	1.01432	0.641932	0.795654	1.20586	1.08031	1.05082	1.05288
	0.92039	0.678705	1.16677	0.646251	0.548074	1.09032	1.17037	1.37168	1.01022	0.644714	0.80635	1.21089	1.08515	1.08724	1.0584
	0.928613	0.712123	1.18433	0.675575	0.551897	1.09367	1.18558	1.37927	1.01261	0.649378	0.808139	1.23894	1.06767	1.08452	1.04501
	0.936399	0.692492	1.18197	0.644708	0.536803	1.09614	1.1769	1.37443	1.01006	0.648535	0.806654	1.23285	1.08651	1.06195	1.05277
	0.906709	0.64199	1.16921	0.648688	0.538861	1.0947	1.16697	1.39584	0.986398	0.64831	0.804866	1.19	1.06449	1.07544	1.05415
	0.956047	0.741046	1.16895	0.669076	0.581594	1.09749	1.20036	1.41655	1.01472	0.646793	0.823795	1.22766	1.11028	1.10285	1.04593
	0.951535	0.686947	1.1696	0.663878	0.582672	1.10984	1.19378	1.40757	1.00784	0.647776	0.795148	1.22568	1.0819	1.1112	1.04616
	0.934071	0.696388	1.1557	0.667046	0.540625	1.11542	1.18887	1.40339	1.0064	0.644882	0.809353	1.25526	1.06903	1.07254	1.07174
	0.90227	0.658474	1.16228	0.646982	0.553759	1.09705	1.20068	1.39334	0.999682	0.636874	0.807565	1.24169	1.07047	1.08192	1.04409
	0.917916	0.696688	1.15091	0.661035	0.558463	1.11323	1.20526	1.42041	1.01118	0.631171	0.793393	1.2545	1.09575	1.05608	1.0342
	0.936836	0.679005	1.17801	0.645277	0.556503	1.11311	1.19928	1.40938	0.988546	0.642943	0.810467	1.24748	1.07296	1.07484	1.02771
	0.939747	0.717069	1.17674	0.670701	0.584534	1.12645	1.20974	1.44182	1.01372	0.658256	0.807025	1.29567	1.09688	1.1112	1.07582
	1.19	0.856886	1.29929	0.726099	0.601392	1.18478	1.24695	1.49469	1.10894	0.706471	0.951377	1.43092	1.22533	1.4097	1.33701
	1.50262	1.08122	1.65239	0.971083	0.730765	1.49211	1.35784	1.63857	1.28354	0.838892	1.17327	1.59912	1.43173	1.68056	1.64574
	1.59613	1.18133	1.81816	1.07733	0.802019	1.62382	1.47595	1.79271	1.35155	0.948414	1.27146	1.65858	1.51219	1.76091	1.77588
	1.67814	1.30871	1.95047	1.18699	0.877683	1.73143	1.54665	1.84459	1.41407	0.988958	1.38217	1.79201	1.5962	1.81542	1.88561
	1.56949	1.22868	1.8832	1.11551	0.826228	1.65514	1.54962	1.88581	1.37967	0.991599	1.39064	1.65477	1.56857	1.71021	1.80267
	1.4618	1.14671	1.80417	1.06986	0.780163	1.57307	1.56046	1.8765	1.32542	0.974769	1.32579	1.60156	1.48025	1.62599	1.6934
	1.36683	1.05155	1.7417	0.96361	0.71969	1.50514	1.53365	1.8302	1.28545	0.933944	1.25621	1.57365	1.45027	1.57118	1.61447
	1.28417	0.992807	1.67932	0.917391	0.666471	1.4847	1.49089	1.80038	1.2275	0.894749	1.21646	1.46478	1.41485	1.47523	1.54256
	1.24945	0.962236	1.62804	0.8836	0.639126	1.43219	1.46894	1.76199	1.20117	0.876401	1.14989	1.50183	1.39744	1.4186	1.50635
	1.17457	0.849693	1.59841	0.831208	0.619622	1.40705	1.42563	1.70563	1.16426	0.837234	1.10572	1.41949	1.32319	1.35719	1.41662
	1.14627	0.89435	1.56984	0.812688	0.626874	1.38255	1.43345	1.70633	1.17492	0.808294	1.07525	1.40241	1.29814	1.33305	1.39202
	1.09584	0.870223	1.52	0.794736	0.616485	1.36976	1.40546	1.69849	1.15165	0.787643	1.04417	1.38853	1.31328	1.31363	1.37248
	1.09671	0.824217	1.53132	0.778897	0.600118	1.3547	1.40422	1.68832	1.12986	0.787221	1.00806	1.3681	1.27876	1.26735	1.35357
	1.09082	0.818672	1.49229	0.774429	0.611585	1.35104	1.37607	1.67237	1.12154	0.753027	0.987043	1.34767	1.26143	1.23002	1.28631
	1.05851	0.843099	1.4736	0.791162	0.620504	1.33777	1.39812	1.68106	1.12266	0.760642	0.965076	1.3832	1.27081	1.2786	1.27292
	1.05625	0.739547	1.49834	0.837056	0.651475	1.48721	1.47384	1.79361	1.23517	0.799528	1.01569	1.23422	1.25454	1.29052	1.32839
	1.30505	1.00405	1.79773	1.06027	0.876311	1.76554	1.61148	1.97617	1.4165	0.925065	1.18339	1.46493	1.39926	1.55418	1.62706
	1.51106	1.17668	2.00078	1.18756	0.913947	1.84841	1.73007	2.06743	1.49318	1.02652	1.32407	1.6255	1.53376	1.6436	1.72357
	1.60115	1.27394	2.17287	1.34676	1.02284	1.97084	1.79269	2.12739	1.53005	1.06873	1.40086	1.70418	1.63495	1.77391	1.85089
	1.52023	1.16784	2.12098	1.2276	0.919926	1.86343	1.81367	2.12268	1.49922	1.07041	1.40393	1.64959	1.59128	1.65963	1.76306
	1.67603	1.32714	2.19713	1.25018	0.911693	1.90622	1.8141	2.07908	1.44696	1.03891	1.40073	1.71622	1.67355	1.77573	1.84566
	1.78358	1.38274	2.21565	1.29023	0.911693	1.93235	1.84694	2.13736	1.49131	1.08027	1.45593	1.76792	1.73759	1.86085	1.99885
	1.85795	1.44583	2.23547	1.28649	0.906694	1.88191	1.8285	2.11501	1.47775	1.07648	1.45974	1.79933	1.73267	1.95928	2.12686
	1.94375	1.44493	2.38399	1.39501	0.996962	2.02446	1.86803	2.18674	1.54743	1.10623	1.52865	1.90302	1.83023	2.02456	2.23309
	1.83714	1.44987	2.35654	1.35635	0.985887	2.01665	1.87499	2.18125	1.53975	1.10798	1.4945	1.77097	1.80442	1.90979	2.1287
	1.85752	1.39892	2.30923	1.32036	0.968637	2.04498	1.92994	2.22124	1.57276	1.1173	1.53766	1.80543	1.78489	1.99292	2.18917
	1.91581	1.49798	2.45521	1.45991	1.01117	2.13375	1.94709	2.21919	1.57253	1.1361	1.57919	1.83105	1.82826	2.03854	2.22487
	1.84966	1.45527	2.3619	1.38916	0.967853	2.0651	1.9245	2.19072	1.50603	1.11124	1.51836	1.78683	1.79216	1.92776	2.16003
	1.74349	1.38558	2.29311	1.27577	0.899245	1.98438	1.88842	2.1673	1.52683	1.08589	1.46875	1.79033	1.77316	1.84282	2.05553
	1.6451	1.22284	2.19744	1.15848	0.837793	1.88896	1.88459	2.19216	1.56087	1.10298	1.47506	1.72827	1.74084	1.84675	2.07225
	1.71241	1.22793	2.14978	1.1004	0.806135	1.84135	1.90303	2.22029	1.59889	1.13576	1.54893	1.81351	1.78512	1.9882	2.23924
	1.8295	1.34917	2.31053	1.21347	0.915025	1.99446	1.94165	2.22608	1.60128	1.12742	1.55655	1.86109	1.86717	2.06244	2.37047
	1.86392	1.38274	2.3243	1.24588	0.904146	1.98586	1.96759	2.21131	1.59249	1.1429	1.55217	1.83532	1.86247	2.11495	2.39702
	1.88866	1.3718	2.44093	1.29648	0.92071	2.0488	1.9342	2.15504	1.49521	1.08069	1.48428	1.77371	1.80684	2.01579	2.29747
	1.84864	1.40447	2.38943	1.28219	0.904538	2.00769	1.97088	2.15947	1.47727	1.07468	1.45141	1.80726	1.81585	1.94779	2.21417
	1.76372	1.32654	2.29019	1.16148	0.873763	1.92526	1.94068	2.11562	1.43893	1.03889	1.382	1.8004	1.76612	1.87961	2.15141
	1.69117	1.30091	2.25041	1.13061	0.837499	1.87482	1.90745	2.0753	1.41984	1.01675	1.33716	1.76167	1.76506	1.84542	2.05639
	1.65718	1.22643	2.14638	1.06636	0.79212	1.80526	1.87698	2.09766	1.50022	1.081	1.42506	1.81991	1.77566	1.95813	2.19538
	1.81538	1.29252	2.29651	1.15263	0.85122	1.92311	1.92245	2.18018	1.54337	1.1241	1.45478	1.79628	1.83348	2.01549	2.22458
	1.88684	1.37434	2.33911	1.22525	0.89062	2.00371	1.95098	2.18194	1.57416	1.1379	1.47999	1.86246	1.86452	2.10848	2.34621
	1.90045	1.41361	2.47155	1.33117	0.933059	2.09343	2.00102	2.19491	1.58664	1.14144	1.50196	1.84568	1.86649	2.14211	2.37547
	1.9126	1.36475	2.45617	1.29713	0.926982	2.03331	2.01084	2.18908	1.55701	1.12321	1.48448	1.82556	1.88533	2.12154	2.42065
	1.83423	1.30961	2.37545	1.2172	0.88523	1.97283	1.99671	2.16349	1.53156	1.09811	1.45448	1.83669	1.86293	2.03612	2.30224
	1.69757	1.28068	2.29729	1.13931	0.803881	1.90709	1.92191	2.12387	1.47433	1.05768	1.39985	1.75816	1.80139	1.96884	2.23217
	1.62102	1.27199	2.23512	1.07814	0.832304	1.8708	1.90077	2.09241	1.43217	1.01885	1.34944	1.72583	1.74955	1.88324	2.1306
	1.53478	1.13367	2.15457	1.02916	0.733216	1.81952	1.8669	2.06423	1.37959	0.990082	1.28236	1.71058	1.6977	1.77918	2.00609
	1.45379	1.13877	2.07724	0.993421	0.727923	1.76271	1.82726	2.02395	1.35485	0.952291	1.22965	1.63403	1.67022	1.73701	1.93154
	1.41588	1.1007	2.001	0.928194	0.700284	1.7404	1.82769	1.97851	1.33846	0.912225	1.18842	1.59317	1.60778	1.69375	1.88481
	1.35301	0.948749	1.9651	0.903338	0.679898	1.68968	1.78967	1.94992	1.29042	0.881684	1.14077	1.50152	1.56252	1.61988	1.79571
	1.29996	0.969129	1.89488	0.864593	0.648535	1.65633	1.7551	1.92744	1.2771	0.864601	1.10703	1.54209	1.55389	1.58769	1.74835
	1.2528	0.961786	1.8636	0.859394	0.628345	1.64586	1.72285	1.92658	1.2586	0.852603	1.09151	1.48353	1.53202	1.52665	1.6869
	1.19539	0.941256	1.80156	0.849647	0.654121	1.6139	1.71314	1.87125	1.23283	0.837094	1.04083	1.45242	1.48161	1.51588	1.63028
	1.19764	0.881912	1.76993	0.812038	0.637852	1.59797	1.69394	1.85115	1.23279	0.814223	1.03131	1.42238	1.47941	1.47214	1.58142
	1.16963	0.8948	1.75081	0.806758	0.644026	1.58104	1.68509	1.84878	1.20264	0.806356	1.01434	1.44587	1.49077	1.46192	1.58924
	1.13455	0.839353	1.70667	0.791812	0.634029	1.55853	1.67587	1.81592	1.18729	0.777893	0.98873	1.41995	1.45527	1.42005	1.53739
	1.13186	0.843399	1.66376	0.792218	0.645692	1.53996	1.64615	1.81285	1.18661	0.757944	0.973107	1.39783	1.4097	1.40384	1.48549
	1.10704	0.814776	1.63396	0.77248	0.588748	1.51287	1.62194	1.80038	1.18073	0.748897	0.960319	1.36962	1.42931	1.35362	1.47911
	1.09751	0.797093	1.59628	0.77646	0.631481	1.49438	1.61336	1.78307	1.16076	0.754067	0.948745	1.33105	1.4125	1.36028	1.43657
	1.07204	0.820471	1.59475	0.765738	0.611879	1.50076	1.58904	1.77683	1.15953	0.730662	0.939702	1.32922	1.37837	1.36427	1.4318
	1.06622	0.780758	1.60024	0.757371	0.635401	1.4855	1.59648	1.77318	1.15734	0.729847	0.928094	1.40515	1.38851	1.3336	1.39472
	1.02431	0.727409	1.542	0.735277	0.581202	1.46151	1.58106	1.75694	1.12405	0.716192	0.909603	1.29064	1.33182	1.31121	1.36466
	1.01244	0.712123	1.55062	0.709528	0.587376	1.44331	1.58376	1.73356	1.11331	0.713579	0.891281	1.26563	1.32902	1.30329	1.36449
	1.05538	0.775363	1.53629	0.763464	0.631187	1.46203	1.56137	1.75149	1.12544	0.705965	0.895735	1.30619	1.35702	1.31744	1.34661
	1.03857	0.723663	1.50972	0.73349	0.616975	1.43793	1.5563	1.73147	1.12099	0.697817	0.887198	1.27996	1.3076	1.27164	1.3039
	1.01703	0.74689	1.48619	0.715133	0.591297	1.45012	1.5556	1.73344	1.11184	0.690427	0.864219	1.29719	1.33205	1.2561	1.30936
	1.00167	0.729057	1.48636	0.709284	0.579829	1.43733	1.53009	1.72762	1.10977	0.682504	0.882946	1.29887	1.30298	1.26723	1.29022
	1.01033	0.753334	1.46733	0.733247	0.594727	1.43108	1.54347	1.72798	1.12099	0.679329	0.885241	1.29231	1.33364	1.27945	1.28407
	1.01186	0.758729	1.47334	0.718869	0.60835	1.44637	1.56752	1.73139	1.09923	0.687561	0.880922	1.32662	1.31941	1.26106	1.28959
	0.99134	0.740596	1.43679	0.728779	0.60296	1.43633	1.54703	1.71178	1.11999	0.678739	0.871744	1.30589	1.33318	1.25991	1.29856
	0.969582	0.744043	1.43674	0.689302	0.625992	1.41964	1.54832	1.72495	1.0939	0.672389	0.873296	1.28118	1.3182	1.23141	1.27033
[truncated: 403 more rows]

## Sheet: Fig7-Suppl Fig 1 A - islet 2
	cell1	cell2	cell3	cell4	cell5	cell6	cell7	cell8	cell9	cell10	cell11
time (min)	fold inc int	fold inc int	fold inc int	fold inc int	fold inc int	fold inc int	fold inc int	fold inc int	fold inc int	fold inc int	fold inc int
1	0.707175	0.783232	0.8	0.812476	0.725688	0.726149	0.757289	0.712346	0.913465	0.773641	0.746402
	0.693488	0.823056	0.794507	0.900039	0.759753	0.760201	0.753712	0.696026	0.915495	0.797283	0.771288
	0.717302	0.839051	0.790806	0.884541	0.734581	0.755029	0.751507	0.699888	0.923909	0.764402	0.75578
	0.727368	0.857143	0.827224	0.900039	0.735442	0.827443	0.753173	0.705619	0.928632	0.83288	0.783267
	0.695882	0.783343	0.766448	0.741573	0.737522	0.71954	0.74298	0.690544	0.910476	0.755435	0.725044
	0.712024	0.836404	0.798806	0.968229	0.73243	0.726006	0.771941	0.723184	0.925089	0.913315	0.766181
	0.708034	0.853833	0.868418	0.90585	0.730135	0.765086	0.742392	0.727669	0.917451	0.863859	0.757823
	0.706193	0.813569	0.761313	0.906238	0.736374	0.748276	0.76464	0.726423	0.928411	0.826359	0.740552
	0.726324	0.855047	0.822209	0.913987	0.743904	0.757471	0.764199	0.730285	0.9314	0.846467	0.783545
	0.705334	0.815003	0.800716	0.886478	0.730924	0.742098	0.740824	0.676467	0.922728	0.750815	0.772031
	0.690174	0.791285	0.789851	0.771019	0.73494	0.706753	0.738815	0.684565	0.90734	0.666576	0.739066
	0.700423	0.802096	0.772537	0.903526	0.75043	0.726437	0.742686	0.705992	0.925569	0.837228	0.768595
	0.712208	0.756646	0.757731	0.803565	0.734581	0.7375	0.739501	0.68145	0.917266	0.734239	0.728944
	0.687964	0.780364	0.746746	0.829136	0.738454	0.731609	0.751703	0.68145	0.914167	0.831522	0.753088
	0.716381	0.845339	0.833313	0.915537	0.728629	0.745259	0.766747	0.703376	0.939555	0.857065	0.770267
	0.728656	0.823497	0.815522	0.926773	0.737306	0.750862	0.766306	0.687928	0.926676	0.838587	0.750023
	0.699196	0.823828	0.817313	0.931034	0.74498	0.762644	0.774293	0.718326	0.946935	0.904891	0.75448
	0.715092	0.804854	0.847403	0.948857	0.728127	0.79181	0.769344	0.728417	0.930366	0.935326	0.764695
	0.718161	0.855819	0.78997	0.897327	0.73788	0.764655	0.760082	0.736763	0.922137	0.858967	0.756895
	0.693918	0.807943	0.786985	0.936071	0.741179	0.793247	0.755378	0.711723	0.921104	0.797011	0.755966
	0.725158	0.841368	0.823045	0.868656	0.717728	0.770546	0.759445	0.691043	0.927599	0.850815	0.768966
	0.700546	0.818312	0.798687	0.875242	0.740103	0.743247	0.756701	0.675844	0.923466	0.838315	0.759959
	0.702694	0.814892	0.779582	0.92871	0.737665	0.769109	0.744695	0.735268	0.92616	0.859783	0.771845
	0.712883	0.804854	0.793672	0.883766	0.737593	0.757902	0.757338	0.698767	0.905126	0.77663	0.726344
	0.699687	0.795587	0.800955	0.895389	0.726477	0.749856	0.738668	0.703376	0.91151	0.827174	0.753273
	0.687166	0.788969	0.77206	0.80124	0.72827	0.724856	0.734993	0.698518	0.920145	0.720924	0.715294
	0.718161	0.79647	0.811582	0.926773	0.759753	0.746408	0.747293	0.67111	0.91424	0.839402	0.766181
	0.692076	0.809046	0.791045	0.835723	0.731211	0.723707	0.753418	0.724804	0.918779	0.832065	0.743802
	0.700853	0.83144	0.77409	0.871755	0.741394	0.732759	0.749939	0.687804	0.920551	0.850272	0.74798
	0.710612	0.811252	0.830328	0.869043	0.726262	0.734195	0.746705	0.684315	0.917746	0.832609	0.749837
	0.703063	0.812576	0.83009	0.839597	0.728844	0.761207	0.749547	0.67846	0.922728	0.768207	0.757731
	0.681274	0.805185	0.771463	0.864394	0.737378	0.758477	0.742735	0.668369	0.930366	0.791576	0.745009
	0.682624	0.779371	0.788299	0.896939	0.717943	0.749425	0.752683	0.720319	0.916454	0.807065	0.77686
	0.691156	0.85273	0.803104	0.860907	0.73831	0.725575	0.757485	0.735144	0.923835	0.772283	0.768224
	0.700669	0.799448	0.793791	0.878342	0.728485	0.792672	0.749841	0.69615	0.93033	0.836957	0.772402
	0.693672	0.816327	0.773731	0.870593	0.73702	0.773851	0.753761	0.673228	0.927304	0.904076	0.740087
	0.683668	0.843464	0.780299	0.88919	0.70317	0.762069	0.743127	0.666501	0.932396	0.774457	0.732287
	0.676548	0.802758	0.790567	0.835335	0.703242	0.7375	0.74151	0.692538	0.926197	0.74837	0.720308
	0.683115	0.788858	0.776955	0.742735	0.724613	0.731178	0.732788	0.662639	0.920698	0.741576	0.74018
	0.714847	0.788417	0.840358	0.956993	0.743761	0.764368	0.758122	0.722063	0.940736	0.919293	0.753088
	0.694531	0.777275	0.773612	0.87563	0.716079	0.723563	0.743372	0.680703	0.926049	0.728804	0.708144
	0.697477	0.809156	0.751284	0.825649	0.724828	0.780316	0.7371	0.66214	0.916897	0.736413	0.725787
	0.670963	0.752234	0.76991	0.85432	0.716724	0.702443	0.748126	0.679706	0.915938	0.737772	0.722444
	0.694654	0.791285	0.735284	0.780705	0.711417	0.690517	0.747195	0.681824	0.925643	0.700272	0.714272
	0.684957	0.810149	0.783522	0.85122	0.737235	0.743247	0.74347	0.694033	0.93199	0.820109	0.762188
	0.695575	0.813348	0.798448	0.8148	0.735298	0.765374	0.729113	0.669864	0.932064	0.825815	0.770174
	0.7065	0.799669	0.791761	0.973654	0.714859	0.752874	0.747881	0.72605	0.933946	0.82337	0.754109
	0.665623	0.81401	0.803582	0.935296	0.713138	0.743678	0.71745	0.669241	0.920292	0.805435	0.75578
	0.699135	0.812355	0.777194	0.794653	0.748566	0.768534	0.740383	0.694656	0.934352	0.821739	0.765159
	0.70963	0.832101	0.847284	0.875242	0.720884	0.793822	0.759886	0.736016	0.939112	0.828261	0.770731
	0.689805	0.814672	0.782328	0.964355	0.718876	0.781322	0.746803	0.711474	0.915126	0.772011	0.735073
	0.675628	0.809377	0.769433	0.827199	0.728987	0.721983	0.756701	0.699514	0.922396	0.777717	0.733959
	0.660038	0.780585	0.771224	0.823712	0.700086	0.743391	0.747636	0.665255	0.905089	0.78125	0.716594
	0.698214	0.812796	0.799761	0.96668	0.737091	0.765805	0.742294	0.722063	0.920624	0.874728	0.781967
	0.708157	0.820077	0.800119	0.900426	0.7178	0.764943	0.739158	0.667123	0.929555	0.867391	0.758473
	0.682993	0.786211	0.755463	0.72685	0.708405	0.712356	0.733425	0.659026	0.912654	0.761685	0.714644
	0.716136	0.80353	0.823164	0.953119	0.744765	0.806609	0.758612	0.698393	0.933688	0.89837	0.756338
	0.713006	0.808715	0.809194	0.94227	0.745338	0.759195	0.741853	0.659898	0.928042	0.843207	0.753366
	0.678389	0.796029	0.789015	0.858969	0.688827	0.708046	0.722007	0.654292	0.916159	0.804891	0.703687
	0.678574	0.823718	0.81003	0.948857	0.710055	0.783046	0.733915	0.663137	0.912691	0.81712	0.756059
	0.657706	0.790292	0.77803	0.838435	0.703385	0.745259	0.739403	0.661268	0.908336	0.739402	0.724023
	0.672436	0.783122	0.761194	0.774893	0.708907	0.729741	0.726662	0.645696	0.920551	0.7625	0.745752
	0.690419	0.806398	0.801791	0.955056	0.710341	0.729598	0.743127	0.686184	0.92472	0.827989	0.775467
	0.682747	0.781026	0.78603	0.920573	0.704317	0.764799	0.747587	0.658278	0.916639	0.810054	0.738602
	0.695207	0.819526	0.803701	0.89074	0.696142	0.702443	0.760327	0.686433	0.929665	0.795109	0.756988
	0.685264	0.774628	0.753075	0.785742	0.703815	0.71092	0.738178	0.636851	0.920698	0.763315	0.710465
	0.698275	0.830778	0.778866	0.864394	0.702524	0.744828	0.742686	0.711349	0.924241	0.821739	0.750116
	0.700546	0.794264	0.780537	0.862456	0.697719	0.732471	0.750037	0.668369	0.92258	0.886141	0.767666
	0.704781	0.810039	0.77206	0.903913	0.687249	0.694397	0.735532	0.675969	0.926307	0.840489	0.776209
	0.685079	0.800552	0.779701	0.835335	0.696285	0.74023	0.741902	0.682571	0.924868	0.77337	0.73693
	0.692506	0.821953	0.781134	0.940333	0.719234	0.772989	0.734013	0.697396	0.926381	0.80788	0.769245
	0.653471	0.798566	0.729672	0.889965	0.699871	0.754598	0.725143	0.644325	0.935865	0.765217	0.714644
	0.693795	0.77882	0.782448	0.797365	0.701664	0.754598	0.722497	0.649682	0.940072	0.775543	0.736559
	0.670104	0.80011	0.824955	0.790004	0.719736	0.733908	0.741167	0.675719	0.930625	0.763859	0.745659
	0.679678	0.779923	0.740179	0.802015	0.710055	0.726724	0.734601	0.645571	0.928226	0.733696	0.735166
	0.692076	0.780474	0.805134	0.882991	0.716079	0.743822	0.759739	0.6518	0.92258	0.842391	0.735351
	0.690296	0.807501	0.782687	0.808989	0.733936	0.810776	0.7592	0.68743	0.935422	0.850815	0.756988
	0.676855	0.769884	0.772896	0.900426	0.690261	0.737069	0.718479	0.678709	0.92199	0.758152	0.752716
	0.68287	0.79647	0.735403	0.843859	0.694205	0.739511	0.74744	0.661891	0.929149	0.76875	0.75253
	0.702694	0.85273	0.795821	0.85122	0.693632	0.78592	0.731416	0.669366	0.934942	0.804891	0.779924
	0.673541	0.770436	0.783761	0.824487	0.685958	0.692816	0.72774	0.645197	0.915421	0.777717	0.725508
	0.68956	0.811031	0.818388	0.880279	0.728199	0.755029	0.748077	0.685187	0.924056	0.789946	0.746309
	0.676794	0.776172	0.73397	0.720263	0.686819	0.732902	0.728966	0.636726	0.910624	0.725543	0.721701
	0.676364	0.820629	0.733612	0.810539	0.737163	0.744109	0.720831	0.655911	0.923318	0.83288	0.752438
	0.69625	0.802206	0.766328	0.828749	0.725545	0.722557	0.736022	0.692413	0.931806	0.744022	0.763859
	0.666728	0.786542	0.79809	0.862844	0.697719	0.713937	0.741265	0.675346	0.919148	0.797011	0.719844
	0.68735	0.794705	0.739821	0.758233	0.707616	0.69296	0.733082	0.642706	0.915126	0.74212	0.706287
	0.678512	0.799559	0.801791	0.888803	0.706971	0.752586	0.747244	0.701134	0.926307	0.850815	0.738416
	0.669735	0.812466	0.799164	0.877179	0.692843	0.739655	0.732935	0.636726	0.927082	0.797011	0.744823
	0.652734	0.763817	0.743642	0.797365	0.700445	0.728592	0.732347	0.666127	0.935348	0.73913	0.733587
	0.661879	0.787976	0.780418	0.767532	0.706397	0.730172	0.722301	0.659773	0.912986	0.75462	0.741387
	0.698398	0.779702	0.762746	0.782642	0.69191	0.717098	0.724996	0.639716	0.922765	0.819022	0.729223
	0.673111	0.821291	0.774328	0.948857	0.717871	0.746264	0.745725	0.690295	0.937931	0.844837	0.763581
	0.690112	0.825593	0.802985	0.878729	0.736159	0.762213	0.724359	0.667871	0.920993	0.782065	0.763581
	0.658442	0.769222	0.76191	0.732274	0.693345	0.70431	0.707061	0.619783	0.9121	0.7	0.697651
	0.64899	0.79647	0.737433	0.763657	0.699512	0.72658	0.716029	0.64146	0.925532	0.742663	0.671557
	0.664887	0.786983	0.784358	0.791554	0.697217	0.771264	0.731073	0.660645	0.927746	0.801359	0.742687
	0.675812	0.825372	0.759761	0.849283	0.700086	0.738506	0.717597	0.655787	0.914425	0.797283	0.729873
	0.688701	0.825483	0.806448	0.841534	0.700086	0.752874	0.72235	0.673851	0.916934	0.84837	0.75383
	0.673234	0.766575	0.740179	0.788067	0.676635	0.702874	0.715049	0.638096	0.914794	0.797011	0.722537
	0.679924	0.798456	0.795343	0.868656	0.729776	0.757902	0.719998	0.666625	0.942692	0.825815	0.765066
	0.661695	0.778709	0.754627	0.749322	0.684811	0.713649	0.726417	0.663137	0.911436	0.764402	0.72653
	0.675321	0.791616	0.760716	0.815963	0.681153	0.741092	0.724555	0.66812	0.908853	0.729076	0.728016
	0.685632	0.841368	0.764179	0.840759	0.688683	0.700575	0.723183	0.652298	0.918484	0.774185	0.733587
	0.676916	0.822063	0.785194	0.821775	0.694205	0.736063	0.710442	0.658278	0.934499	0.78125	0.737487
	0.676119	0.800993	0.725254	0.78458	0.694492	0.752011	0.713432	0.647564	0.92258	0.772826	0.73433
	0.69312	0.804413	0.782687	0.829136	0.715361	0.743534	0.723085	0.702006	0.92878	0.838315	0.743244
	0.690358	0.774076	0.772299	0.8179	0.689042	0.706466	0.71206	0.666625	0.936086	0.780435	0.74343
	0.67127	0.82096	0.756776	0.800077	0.671543	0.716954	0.710148	0.662514	0.916418	0.772283	0.711858
	0.67084	0.790403	0.767164	0.849283	0.690046	0.748132	0.721272	0.661767	0.930256	0.808967	0.733587
	0.665316	0.777827	0.782806	0.903526	0.678141	0.741523	0.696967	0.614302	0.918336	0.831522	0.709351
	0.664089	0.766354	0.715821	0.714064	0.674627	0.711494	0.725192	0.640962	0.921141	0.702989	0.709072
	0.67127	0.791506	0.778866	0.838822	0.707186	0.717672	0.722546	0.65616	0.92461	0.792391	0.721051
	0.68735	0.808605	0.774806	0.797753	0.69564	0.764943	0.722889	0.65778	0.924056	0.785598	0.754202
	0.658381	0.798566	0.76406	0.833398	0.706899	0.706897	0.710393	0.622275	0.931843	0.741848	0.720958
	0.66771	0.734363	0.73397	0.737699	0.684237	0.716954	0.700642	0.629251	0.921178	0.759239	0.711858
	0.673664	0.788086	0.728	0.810539	0.681655	0.753161	0.719998	0.66214	0.911067	0.745109	0.715108
	0.636408	0.783122	0.744597	0.704378	0.694851	0.68592	0.706767	0.609194	0.92103	0.755978	0.736744
	0.663414	0.801434	0.75809	0.807826	0.718373	0.732902	0.747097	0.657406	0.918115	0.863043	0.743152
	0.658933	0.786873	0.772896	0.866331	0.700014	0.694253	0.704562	0.609443	0.922654	0.794837	0.733959
	0.678144	0.806839	0.788776	0.83301	0.694062	0.731466	0.722938	0.641086	0.935606	0.819022	0.730709
	0.679985	0.818423	0.744716	0.956993	0.698006	0.761063	0.72828	0.649184	0.932617	0.851359	0.749187
	0.666851	0.793602	0.72609	0.769469	0.703528	0.703592	0.713285	0.650928	0.923466	0.716033	0.717244
	0.652182	0.790072	0.735761	0.69353	0.692556	0.705747	0.711962	0.669615	0.915347	0.69837	0.71158
	0.650954	0.757088	0.727045	0.669508	0.681799	0.73319	0.708825	0.648935	0.912063	0.759239	0.684929
	0.661388	0.811693	0.79594	0.887253	0.706038	0.738649	0.70368	0.679706	0.915753	0.782065	0.709351
	0.667771	0.783343	0.757134	0.85432	0.687966	0.712069	0.699809	0.64283	0.908262	0.766848	0.711487
	0.670104	0.81059	0.773731	0.85742	0.700086	0.730891	0.709413	0.643578	0.930071	0.819837	0.729501
	0.656355	0.803751	0.765015	0.78303	0.681368	0.730747	0.708384	0.634359	0.918632	0.824457	0.714737
	0.672988	0.811693	0.786985	0.94847	0.700588	0.745402	0.714804	0.682945	0.921879	0.754348	0.739252
	0.658442	0.766685	0.749731	0.857807	0.666093	0.722414	0.68697	0.660521	0.915532	0.79837	0.717615
	0.684097	0.859901	0.779224	1.00116	0.705178	0.769109	0.728378	0.68145	0.919813	0.869565	0.768316
	0.679801	0.793381	0.778388	0.843859	0.699584	0.728017	0.700691	0.623894	0.908262	0.81875	0.695051
	0.655312	0.788527	0.747821	0.732274	0.706038	0.732759	0.704513	0.6371	0.922064	0.786685	0.727644
	0.660775	0.777827	0.766209	0.709802	0.674053	0.695546	0.704268	0.600847	0.913465	0.673641	0.703036
	0.667158	0.783784	0.738507	0.79969	0.660069	0.697845	0.680747	0.645073	0.902764	0.711685	0.704244
	0.648499	0.790072	0.724418	0.781867	0.670611	0.733908	0.702896	0.655164	0.90269	0.740761	0.732659
	0.660161	0.798676	0.754866	0.822162	0.684811	0.710632	0.717842	0.650554	0.926898	0.826359	0.715665
	0.66501	0.779371	0.808358	0.903913	0.696859	0.760489	0.711815	0.668494	0.916676	0.811685	0.734423
	0.664703	0.783784	0.749373	0.816738	0.669464	0.724569	0.695742	0.650928	0.914462	0.825272	0.71028
	0.662739	0.809377	0.754149	0.963193	0.700301	0.738793	0.715931	0.662265	0.928337	0.853533	0.732566
	0.671208	0.780916	0.791642	0.893452	0.679002	0.71523	0.720243	0.633487	0.925126	0.913315	0.705451
	0.66415	0.785549	0.744358	0.824099	0.679791	0.699138	0.713187	0.620904	0.918004	0.734511	0.73108
	0.669858	0.797463	0.734567	0.722976	0.691982	0.725575	0.705003	0.63548	0.923355	0.785326	0.71028
	0.66323	0.769553	0.774925	0.722588	0.680866	0.696264	0.701916	0.64308	0.914536	0.711413	0.720958
	0.65163	0.800772	0.748776	0.754746	0.706182	0.703736	0.700691	0.62078	0.926455	0.764946	0.68725
	0.655312	0.781247	0.724299	0.8179	0.679575	0.780603	0.696771	0.649558	0.932839	0.792663	0.717801
	0.653655	0.785769	0.733612	0.751259	0.683592	0.693247	0.705101	0.64881	0.917451	0.819022	0.732473
	0.666728	0.803089	0.775642	0.862456	0.695353	0.669253	0.712844	0.669117	0.925311	0.831522	0.763488
	0.663843	0.765913	0.761194	0.768307	0.673766	0.679167	0.70858	0.633113	0.923097	0.740489	0.691893
	0.682133	0.808494	0.776239	0.901589	0.70568	0.711494	0.703141	0.669615	0.932285	0.869565	0.743709
	0.646781	0.780916	0.765015	0.807826	0.671902	0.687644	0.689567	0.65616	0.912321	0.75	0.706751
	0.657583	0.805074	0.769791	0.871755	0.694062	0.714368	0.712452	0.668868	0.934868	0.750272	0.718915
	0.660897	0.786762	0.76609	0.787679	0.660141	0.71092	0.695497	0.651925	0.925901	0.769022	0.723558
	0.669306	0.772311	0.754149	0.907013	0.672332	0.720977	0.68648	0.641211	0.913392	0.722554	0.710001
	0.653409	0.762603	0.780657	0.732274	0.668388	0.679023	0.685892	0.644076	0.916344	0.719837	0.705079
	0.669122	0.785108	0.721313	0.800077	0.669248	0.747126	0.69388	0.630746	0.923798	0.804891	0.688643
	0.678205	0.807832	0.769433	0.941883	0.685671	0.745546	0.702651	0.68282	0.933946	0.797011	0.741852
	0.662432	0.802868	0.758925	0.817125	0.701018	0.74181	0.709511	0.658403	0.933835	0.823641	0.745937
	0.660406	0.773414	0.727642	0.759783	0.692843	0.71796	0.702994	0.635854	0.924757	0.850543	0.710558
	0.670288	0.787645	0.789254	0.88764	0.705034	0.750575	0.70809	0.658777	0.934795	0.819293	0.726066
	0.667526	0.770546	0.749134	0.696629	0.674484	0.724425	0.70221	0.626884	0.932101	0.805707	0.680565
	0.662739	0.774959	0.789731	0.854707	0.688683	0.724569	0.721468	0.673726	0.938153	0.769293	0.722444
	0.6744	0.810149	0.748299	0.922123	0.672762	0.751437	0.702553	0.689548	0.921916	0.766033	0.690129
	0.646474	0.759184	0.720119	0.839985	0.677209	0.71092	0.702798	0.631867	0.944721	0.69375	0.696351
	0.653716	0.785438	0.73791	0.828749	0.656483	0.703592	0.698143	0.65479	0.921731	0.73125	0.709072
	0.666114	0.772532	0.755463	0.809764	0.685241	0.72342	0.70466	0.675969	0.921104	0.759783	0.741016
	0.66814	0.812796	0.753433	0.900814	0.696859	0.737356	0.698682	0.633861	0.927783	0.807337	0.717708
	0.641134	0.774407	0.734687	0.745448	0.667671	0.69727	0.679228	0.61779	0.920366	0.780978	0.698115
	0.658504	0.774959	0.715463	0.716776	0.664443	0.722557	0.691625	0.623894	0.918632	0.783152	0.708701
	0.646781	0.821291	0.790687	0.976753	0.670109	0.718966	0.706963	0.648686	0.933688	0.788587	0.724673
	0.665439	0.771098	0.76394	0.938009	0.669105	0.712644	0.705101	0.615548	0.914757	0.790217	0.728851
	0.680354	0.835632	0.853254	0.969004	0.687034	0.789511	0.702112	0.693285	0.943467	0.820109	0.739066
	0.652366	0.79294	0.733015	0.856257	0.691839	0.725718	0.700397	0.625514	0.912654	0.754076	0.711858
	0.656478	0.756426	0.767045	0.922511	0.685384	0.703736	0.699123	0.653171	0.910439	0.847011	0.711301
	0.654514	0.756426	0.736836	0.769082	0.672691	0.707471	0.688979	0.588888	0.929075	0.806793	0.724487
	0.687105	0.795808	0.765493	0.85587	0.679145	0.709626	0.704366	0.670736	0.934499	0.788587	0.715015
	0.674523	0.758853	0.742806	0.784192	0.671185	0.660057	0.70466	0.622524	0.929259	0.839674	0.716501
	0.645001	0.790292	0.696955	0.810539	0.67391	0.72227	0.688244	0.627009	0.935606	0.728533	0.689758
	0.649727	0.76845	0.729075	0.873305	0.663439	0.701293	0.691233	0.626635	0.902543	0.710598	0.6814
	0.640766	0.741754	0.736478	0.770244	0.671041	0.70977	0.691527	0.60583	0.917082	0.712772	0.710001
	0.659915	0.736018	0.733373	0.752422	0.659208	0.682184	0.69535	0.607948	0.918705	0.647554	0.687065
	0.6396	0.767678	0.727403	0.668346	0.655192	0.685776	0.686284	0.602218	0.918853	0.719022	0.699879
	0.658504	0.776944	0.753313	0.842309	0.666452	0.708333	0.689616	0.627133	0.924499	0.784511	0.712972
	0.657399	0.778378	0.72991	0.788842	0.673336	0.689655	0.689616	0.61642	0.907709	0.697011	0.706472
	0.641441	0.783673	0.724299	0.784192	0.664587	0.671408	0.696085	0.625389	0.921399	0.788587	0.694215
	0.664641	0.764148	0.738866	0.753196	0.651176	0.743966	0.689616	0.625389	0.919296	0.773641	0.695329
	0.654637	0.779482	0.744	0.776443	0.667671	0.752443	0.681237	0.617915	0.927082	0.822011	0.710372
	0.663291	0.795256	0.740418	0.888415	0.678141	0.749138	0.707453	0.628255	0.910144	0.889402	0.735723
	0.672988	0.814341	0.749612	0.985664	0.671472	0.750431	0.699858	0.649682	0.930625	0.851359	0.719008
	0.657153	0.767016	0.729313	0.835723	0.673551	0.705172	0.69089	0.592749	0.913465	0.794022	0.711858
	0.655251	0.766795	0.784478	0.865556	0.672619	0.693678	0.703827	0.664507	0.922875	0.800272	0.707494
	0.665746	0.78257	0.762507	0.940333	0.672476	0.743534	0.705444	0.679332	0.925754	0.776902	0.726994
	0.686061	0.82802	0.738269	0.843472	0.672619	0.765517	0.695301	0.637224	0.927894	0.840761	0.715665
	0.652059	0.74749	0.746627	0.8179	0.643574	0.714655	0.690547	0.607076	0.921104	0.81413	0.692265
	0.645737	0.739437	0.744239	0.762108	0.649025	0.722414	0.689861	0.60309	0.918742	0.73587	0.726158
	0.668815	0.805185	0.75606	0.856257	0.672691	0.714943	0.685059	0.658278	0.933724	0.745652	0.722165
	0.658811	0.776834	0.739821	0.856645	0.676277	0.713218	0.68305	0.658527	0.919296	0.813859	0.692172
	0.675321	0.768891	0.75797	0.744285	0.66932	0.768534	0.693978	0.631992	0.926086	0.824728	0.724673
	0.662554	0.77209	0.753672	0.765595	0.671687	0.700144	0.689077	0.63548	0.929776	0.752717	0.703965
	0.633278	0.774297	0.752716	0.834948	0.682301	0.669109	0.688685	0.608197	0.924167	0.749457	0.722258
	0.640214	0.713183	0.691582	0.638125	0.649025	0.690517	0.665115	0.593746	0.91103	0.622011	0.694865
	0.650586	0.766023	0.742687	0.872143	0.66222	0.722701	0.681335	0.628379	0.925126	0.778261	0.702758
	0.652366	0.776172	0.736836	0.886478	0.672978	0.715374	0.684275	0.605083	0.933503	0.776087	0.678893
	0.666298	0.775951	0.759164	0.790004	0.65971	0.675	0.673543	0.626635	0.928411	0.728261	0.707029
	0.661511	0.787093	0.753552	0.681906	0.666308	0.702874	0.695105	0.65915	0.924056	0.771739	0.688272
	0.658381	0.74043	0.753194	0.841922	0.672404	0.706178	0.685304	0.611063	0.915532	0.753804	0.68335
	0.656785	0.7508	0.746388	0.867493	0.666595	0.726437	0.683932	0.604834	0.913982	0.769022	0.705822
	0.645922	0.79305	0.765493	0.915537	0.663655	0.726149	0.688391	0.658154	0.937784	0.791304	0.705079
	0.660161	0.797242	0.721672	0.808214	0.672332	0.685345	0.668839	0.659275	0.930588	0.803261	0.715572
	0.659854	0.780916	0.787224	0.860519	0.663726	0.707759	0.694174	0.6518	0.909886	0.762772	0.715665
	0.634751	0.76139	0.696836	0.891902	0.65677	0.679598	0.675553	0.647315	0.895568	0.697283	0.678336
	0.65832	0.766133	0.73791	0.809764	0.649742	0.724138	0.68452	0.598356	0.921289	0.80625	0.693008
	0.660897	0.798014	0.722388	0.881054	0.672978	0.719971	0.690253	0.651053	0.911399	0.79538	0.720494
	0.65255	0.749586	0.767403	0.916699	0.661862	0.697989	0.683932	0.632615	0.934167	0.772283	0.730151
	0.63825	0.754109	0.695761	0.740798	0.656627	0.709195	0.675602	0.608571	0.905716	0.729891	0.6801
	0.674707	0.776282	0.753075	0.802402	0.674412	0.705029	0.678787	0.595615	0.917488	0.833424	0.713715
	0.645001	0.781357	0.722627	0.834948	0.641279	0.704167	0.686431	0.615298	0.916823	0.733967	0.687993
	0.640275	0.785659	0.737672	0.855482	0.650531	0.684195	0.675896	0.624766	0.93295	0.772826	0.701551
	0.653532	0.760949	0.756179	0.860132	0.675201	0.737787	0.696036	0.661268	0.921768	0.871196	0.714365
	0.625852	0.756977	0.704716	0.716389	0.680293	0.696839	0.672171	0.602093	0.920477	0.675272	0.691986
	0.668753	0.797683	0.774448	0.889965	0.676492	0.735057	0.683883	0.604335	0.921658	0.896196	0.701644
	0.669674	0.812576	0.75403	0.899651	0.669822	0.76681	0.696379	0.706989	0.927082	0.764946	0.720123
	0.656417	0.784556	0.719522	0.809764	0.668531	0.665374	0.682658	0.623147	0.908336	0.7125	0.670814
	0.654514	0.782791	0.755821	0.932584	0.636618	0.716092	0.680355	0.626635	0.925016	0.733152	0.692543
	0.636163	0.778599	0.717731	0.701279	0.661431	0.710057	0.667614	0.591753	0.919111	0.809239	0.689758
	0.661327	0.756426	0.729075	0.921736	0.642068	0.688075	0.6806	0.630622	0.918373	0.797011	0.705451
	0.671454	0.801324	0.750328	0.834173	0.683735	0.728017	0.669182	0.631992	0.933614	0.796196	0.702851
	0.655619	0.798676	0.753075	0.809764	0.643933	0.718822	0.681237	0.628255	0.90996	0.804891	0.711208
	0.654944	0.720905	0.729075	0.824487	0.625932	0.672414	0.675749	0.619285	0.91151	0.779076	0.681679
	0.650709	0.756757	0.745791	0.68888	0.639773	0.696552	0.671632	0.627383	0.917783	0.738587	0.681122
	0.646842	0.745836	0.724299	0.814026	0.640419	0.675862	0.681384	0.624766	0.914572	0.708967	0.658464
	0.65255	0.76834	0.735284	0.898102	0.642212	0.719684	0.687362	0.62676	0.918964	0.767663	0.691893
	0.662002	0.782129	0.760955	0.860132	0.65677	0.700431	0.696673	0.642208	0.914905	0.747826	0.715758
	0.643037	0.769884	0.757851	0.788067	0.64465	0.742672	0.686382	0.620904	0.924315	0.799185	0.705172
	0.658811	0.766575	0.720597	0.806664	0.638554	0.714511	0.680747	0.609069	0.911214	0.747283	0.700065
	0.673479	0.796029	0.776358	0.944983	0.661073	0.727155	0.705689	0.661268	0.921658	0.889402	0.719844
	0.661572	0.792278	0.748299	0.921348	0.659208	0.759914	0.683344	0.634857	0.92103	0.903261	0.691243
	0.640766	0.749366	0.693612	0.663696	0.636331	0.70704	0.676729	0.609069	0.914019	0.714402	0.673693
	0.645676	0.771429	0.748776	0.811701	0.632458	0.699856	0.6806	0.639591	0.923613	0.813315	0.676107
	0.655864	0.749807	0.693015	0.783805	0.633678	0.732759	0.678101	0.581039	0.91948	0.70163	0.701179
	0.650095	0.744071	0.734925	0.765595	0.644291	0.704167	0.672024	0.63411	0.908115	0.76712	0.666543
	0.649481	0.769774	0.731104	0.829523	0.658778	0.674282	0.699123	0.612931	0.911842	0.795109	0.692079
	0.663721	0.771649	0.736	0.862844	0.670898	0.728305	0.6683	0.605332	0.898446	0.742663	0.684558
	0.643282	0.761611	0.741731	0.759396	0.684309	0.710489	0.674376	0.619534	0.932064	0.781522	0.694586
	0.643712	0.759184	0.719164	0.757846	0.652682	0.696552	0.682266	0.613803	0.907561	0.761957	0.679265
	0.64586	0.762934	0.728955	0.883379	0.640706	0.669109	0.698241	0.604958	0.908668	0.746196	0.665707
	0.670349	0.784446	0.768478	0.836885	0.634753	0.70546	0.678934	0.611686	0.917377	0.759783	0.708608
	0.657092	0.774959	0.720836	0.791166	0.646873	0.702874	0.685794	0.62215	0.919849	0.83913	0.664314
	0.648377	0.748152	0.737552	0.78148	0.643287	0.709339	0.672857	0.614177	0.925901	0.816848	0.687436
	0.648315	0.761721	0.740537	0.863619	0.643072	0.738937	0.689224	0.627258	0.940773	0.828261	0.730987
	0.648868	0.791726	0.768358	0.752422	0.670826	0.708046	0.674817	0.646817	0.922802	0.790761	0.707865
	0.660897	0.76492	0.732896	0.802015	0.644076	0.711063	0.691968	0.630248	0.92568	0.806793	0.689108
	0.651936	0.762603	0.722985	0.764432	0.639989	0.713937	0.661881	0.631867	0.916049	0.780978	0.683815
	0.665439	0.789851	0.752597	0.888803	0.653328	0.754167	0.687901	0.622275	0.934352	0.778261	0.708051
	0.653348	0.769112	0.758209	0.805889	0.632745	0.718391	0.693586	0.671608	0.906048	0.765761	0.674343
	0.642669	0.758301	0.73994	0.743123	0.641566	0.714368	0.675455	0.605332	0.887819	0.697283	0.661621
	0.629964	0.714837	0.716179	0.683843	0.62292	0.675	0.670701	0.608073	0.919038	0.842663	0.646764
	0.643773	0.78246	0.72191	0.794653	0.64673	0.704885	0.673249	0.633861	0.911067	0.783967	0.714737
	0.635795	0.748814	0.725373	0.794266	0.630379	0.731753	0.657078	0.596861	0.896048	0.696196	0.683443
	0.645676	0.774628	0.742806	0.867106	0.660499	0.702874	0.665605	0.638844	0.91306	0.794022	0.680657
	0.66059	0.752013	0.734448	0.867106	0.639917	0.71796	0.682315	0.619908	0.920624	0.807337	0.680379
	0.653348	0.734915	0.721672	0.689655	0.609653	0.683046	0.671436	0.577925	0.903945	0.703533	0.696258
	0.654146	0.75775	0.746866	0.820612	0.655336	0.751724	0.681139	0.624642	0.915901	0.79538	0.6892
	0.647579	0.765472	0.730746	0.752034	0.659495	0.713937	0.686921	0.613554	0.918004	0.753804	0.664221
	0.657031	0.762934	0.762149	0.849283	0.640562	0.698563	0.670407	0.63548	0.911805	0.831793	0.6671
	0.661818	0.78235	0.743881	0.792716	0.654618	0.69181	0.677709	0.618039	0.903465	0.810326	0.700901
	0.652857	0.760066	0.748537	0.871368	0.647662	0.727299	0.67026	0.623396	0.900181	0.775543	0.691336
	0.666237	0.792499	0.715582	0.887253	0.634825	0.750144	0.661195	0.638346	0.919813	0.749728	0.689758
	0.647272	0.798125	0.738269	0.793491	0.653041	0.71954	0.675553	0.611063	0.913871	0.84212	0.71808
	0.659977	0.776062	0.755821	0.817125	0.653543	0.745977	0.672171	0.638096	0.920551	0.804891	0.669607
	0.652366	0.784556	0.714507	0.94227	0.63418	0.702586	0.662763	0.594618	0.913502	0.77962	0.660228
	0.646597	0.72642	0.734448	0.714064	0.628873	0.683764	0.665997	0.588888	0.918373	0.785326	0.666636
	0.662309	0.764699	0.711045	0.748547	0.639415	0.675575	0.663547	0.604958	0.921658	0.669837	0.675736
	0.648745	0.723552	0.707582	0.751647	0.643933	0.710201	0.663008	0.564096	0.904794	0.700543	0.684372
	0.641993	0.748042	0.711881	0.776056	0.643718	0.707328	0.660803	0.622275	0.899443	0.795109	0.677965
	0.652305	0.765803	0.751403	0.80279	0.65261	0.715661	0.674033	0.622399	0.903871	0.816304	0.697186
	0.652059	0.773414	0.74006	0.913212	0.646586	0.758764	0.675896	0.611063	0.922506	0.813043	0.690036
	0.657706	0.79647	0.727284	0.882216	0.640777	0.731322	0.682168	0.638844	0.915163	0.805707	0.676386
	0.654882	0.760507	0.728358	0.776056	0.63755	0.708333	0.67467	0.6295	0.902432	0.74375	0.698486
	0.661879	0.765913	0.728478	0.85587	0.657129	0.69454	0.662665	0.639591	0.9221	0.836685	0.700901
	0.632726	0.787424	0.735045	0.771406	0.620267	0.701006	0.661391	0.598605	0.912211	0.730163	0.6775
	0.658074	0.752565	0.726567	0.774506	0.619836	0.65977	0.665458	0.586645	0.889295	0.763859	0.672207
	0.650034	0.783563	0.705672	0.850833	0.651463	0.706322	0.684569	0.636228	0.931769	0.794022	0.672672
	0.660897	0.787204	0.735642	0.86943	0.619765	0.67342	0.654334	0.624766	0.909923	0.689674	0.674343
	0.645001	0.781908	0.696955	0.821775	0.643718	0.683908	0.663988	0.623645	0.905937	0.782065	0.664314
	0.62757	0.72973	0.697194	0.638512	0.608649	0.682184	0.655265	0.605332	0.907746	0.679891	0.620763
	0.651077	0.784997	0.773731	0.813251	0.632387	0.698851	0.672465	0.660645	0.910809	0.786141	0.682793
	0.63469	0.76834	0.685134	0.821	0.633176	0.669109	0.66193	0.620282	0.906417	0.718207	0.649642
	0.637697	0.735135	0.726328	0.773344	0.619836	0.681322	0.655265	0.586396	0.904867	0.693478	0.653171
	0.616829	0.705792	0.68406	0.680744	0.634036	0.651293	0.650855	0.592999	0.891103	0.680978	0.660507
	0.637697	0.777716	0.710567	0.744285	0.638267	0.69296	0.679963	0.628753	0.902026	0.792935	0.684093
	0.664457	0.742967	0.707582	0.801627	0.640204	0.700862	0.6683	0.641709	0.913613	0.746739	0.662086
	0.658811	0.775841	0.716896	0.831848	0.63461	0.739655	0.678738	0.627133	0.905273	0.728804	0.704058
	0.626465	0.695863	0.687522	0.605579	0.604776	0.63046	0.639143	0.57481	0.888557	0.628533	0.615285
	0.650034	0.750579	0.713552	0.831073	0.647447	0.681322	0.652668	0.586271	0.911842	0.764674	0.67815
	0.639047	0.728958	0.692299	0.727625	0.604274	0.735057	0.687607	0.602218	0.89066	0.767391	0.6827
	0.633462	0.785769	0.693015	0.739248	0.6179	0.670259	0.660852	0.556995	0.90531	0.698913	0.682236
	0.670226	0.785218	0.701851	0.849283	0.635614	0.761063	0.683197	0.626137	0.919554	0.81087	0.721515
	0.653409	0.780143	0.706627	0.753971	0.640777	0.718103	0.658598	0.613928	0.929961	0.742935	0.68205
	0.637697	0.788086	0.704836	0.813251	0.61245	0.674569	0.652668	0.583032	0.917377	0.684783	0.666636
	0.643344	0.78257	0.738269	0.812863	0.633964	0.723276	0.66487	0.635605	0.899812	0.801087	0.674714
	0.644817	0.749586	0.716537	0.758621	0.613382	0.673851	0.662763	0.625638	0.911805	0.69375	0.66645
	0.644694	0.749476	0.732299	0.743898	0.642427	0.704741	0.648454	0.601844	0.910107	0.758967	0.699972
	0.636531	0.754771	0.72	0.800465	0.622633	0.69023	0.644877	0.615423	0.902321	0.766033	0.668771
	0.663782	0.784225	0.692299	0.85122	0.624785	0.703736	0.67173	0.635854	0.903982	0.76712	0.657164
	0.665807	0.778599	0.736119	0.807052	0.63418	0.709052	0.676729	0.644948	0.904019	0.846739	0.692822
	0.642423	0.762162	0.688597	0.765207	0.64214	0.708046	0.649679	0.628878	0.901214	0.783967	0.685022
	0.644203	0.742747	0.710328	0.682681	0.615247	0.723276	0.654187	0.579046	0.902838	0.777717	0.655957
	0.662677	0.745394	0.710448	0.83921	0.639128	0.74727	0.65948	0.639093	0.905679	0.833152	0.699415
	0.64586	0.75455	0.719522	0.691205	0.630594	0.679741	0.652766	0.602342	0.886859	0.761685	0.675643
	0.637881	0.769443	0.730507	0.720651	0.628586	0.673276	0.665899	0.618787	0.902948	0.791033	0.648435
	0.62131	0.746828	0.684896	0.684618	0.630235	0.702155	0.640957	0.570948	0.896269	0.778261	0.673786
	0.648499	0.739217	0.713552	0.788842	0.634466	0.730316	0.652521	0.633612	0.893612	0.772011	0.657164
	0.639047	0.752675	0.693134	0.79659	0.636976	0.674569	0.660019	0.604709	0.90103	0.750272	0.644257
	0.642178	0.760177	0.691463	0.791166	0.645797	0.707328	0.64081	0.605207	0.919591	0.752717	0.668493
	0.643773	0.771649	0.733851	0.780705	0.621773	0.710632	0.651737	0.616046	0.894682	0.742663	0.678243
	0.653962	0.77882	0.728119	0.74816	0.616107	0.667529	0.651051	0.649558	0.90376	0.791304	0.666729
	0.637083	0.740099	0.697313	0.733437	0.612235	0.645402	0.646935	0.594494	0.901878	0.743478	0.643792
	0.634628	0.756977	0.738746	0.832236	0.630307	0.684052	0.66242	0.637598	0.90162	0.866848	0.667471
	0.658811	0.754661	0.699582	0.742348	0.616394	0.639368	0.668055	0.61044	0.898004	0.782065	0.664964
	0.63426	0.759846	0.702806	0.772956	0.627008	0.668534	0.646543	0.613056	0.89745	0.749728	0.671836
	0.646535	0.755654	0.705075	0.789616	0.630307	0.722701	0.652325	0.630123	0.914536	0.847283	0.719751
	0.639538	0.727523	0.707821	0.772181	0.643646	0.698707	0.655657	0.598729	0.913133	0.766848	0.643142
	0.653839	0.743078	0.743284	0.769857	0.629877	0.685201	0.654775	0.610564	0.9021	0.745652	0.652985
	0.633094	0.741533	0.712358	0.709802	0.617255	0.703448	0.63586	0.605083	0.91306	0.710598	0.687158
	0.646044	0.767568	0.739821	0.769857	0.626721	0.687644	0.648552	0.603588	0.90793	0.751359	0.682979
	0.652612	0.742416	0.724657	0.8148	0.643861	0.708477	0.655902	0.607824	0.907229	0.840489	0.681029
	0.656233	0.802096	0.736836	0.861294	0.633391	0.724569	0.659284	0.620032	0.909259	0.832609	0.659671
	0.657706	0.75775	0.720955	0.831073	0.634466	0.687787	0.649434	0.604585	0.919628	0.75	0.672672
	0.63825	0.766023	0.740179	0.888415	0.631813	0.69296	0.643505	0.614675	0.912727	0.744565	0.679636
	0.661204	0.766906	0.737672	0.868656	0.638698	0.718966	0.665017	0.640713	0.923429	0.78587	0.677779
	0.662616	0.763817	0.732657	0.846571	0.630379	0.729167	0.663841	0.633612	0.909185	0.829076	0.688458
	0.649113	0.737672	0.751881	0.790779	0.621773	0.714511	0.664527	0.660645	0.91413	0.825543	0.695143
	0.630823	0.767899	0.660418	0.615653	0.626147	0.665948	0.639927	0.586022	0.884424	0.672554	0.626985
	0.646474	0.75422	0.689194	0.769082	0.607788	0.691954	0.644926	0.626137	0.911731	0.798641	0.651407
	0.612042	0.744181	0.696239	0.649748	0.583118	0.659195	0.646347	0.561729	0.90686	0.733152	0.640542
	0.62978	0.704357	0.685254	0.740798	0.61747	0.662069	0.636693	0.599601	0.889664	0.727174	0.643049
	0.637943	0.76503	0.713791	0.779155	0.611804	0.715086	0.671975	0.621527	0.911325	0.770109	0.637757
	0.636531	0.798787	0.717612	0.895777	0.631956	0.6875	0.642084	0.630497	0.917266	0.76087	0.647414
	0.636592	0.735025	0.693731	0.697792	0.614458	0.684914	0.636791	0.573315	0.883538	0.79212	0.645464
	0.642914	0.721787	0.680955	0.803565	0.594162	0.65158	0.640663	0.565093	0.897967	0.734511	0.647878
	0.645431	0.744732	0.688478	0.749709	0.596601	0.688506	0.634635	0.55114	0.890217	0.754076	0.634414
	0.653839	0.801655	0.745672	0.870205	0.631885	0.705172	0.668888	0.620282	0.924425	0.795652	0.671093
	0.621494	0.744622	0.720836	0.720651	0.610083	0.693678	0.638604	0.559985	0.895125	0.723641	0.645557
	0.640029	0.759294	0.719045	0.861682	0.623781	0.699713	0.665752	0.618537	0.906934	0.821196	0.665336
	0.633646	0.765251	0.696478	0.78148	0.640921	0.710776	0.646004	0.589261	0.910255	0.747011	0.667379
	0.643344	0.770656	0.726328	0.867493	0.63963	0.698707	0.666389	0.638595	0.904056	0.78587	0.676479
	0.624194	0.75102	0.70997	0.722976	0.584839	0.663649	0.654285	0.600972	0.89424	0.683152	0.629121
	0.655926	0.729288	0.712478	0.829911	0.621558	0.714799	0.651835	0.591628	0.898041	0.841033	0.664221
	0.644203	0.758301	0.731582	0.85277	0.638483	0.694109	0.658794	0.618787	0.89018	0.77038	0.682422
	0.648561	0.766685	0.711403	0.794653	0.62543	0.703592	0.648797	0.59549	0.892431	0.727717	0.653914
	0.638065	0.789741	0.721791	0.843084	0.618115	0.70819	0.664086	0.627383	0.889848	0.745109	0.675457
	0.633339	0.762162	0.709731	0.898876	0.643861	0.680603	0.669182	0.627009	0.895015	0.822826	0.654843
	0.656049	0.764479	0.702806	0.831073	0.624498	0.706034	0.643358	0.606952	0.906971	0.835054	0.660878
	0.647579	0.759404	0.71594	0.8179	0.616251	0.70431	0.652962	0.577675	0.894129	0.774728	0.655121
	0.64721	0.731164	0.714746	0.776056	0.602768	0.675718	0.618072	0.578298	0.894092	0.717663	0.654657
	0.664764	0.729068	0.740418	0.87253	0.623566	0.690517	0.652325	0.62514	0.879996	0.763587	0.661064
	0.628798	0.726751	0.679045	0.714839	0.596959	0.691954	0.616259	0.599851	0.877191	0.729891	0.634228
	0.6396	0.767678	0.716418	0.812863	0.617542	0.716667	0.646298	0.626012	0.8959	0.79538	0.669886
	0.638556	0.769774	0.736955	0.831848	0.619406	0.691523	0.662763	0.648063	0.919444	0.765489	0.643328
	0.645492	0.771539	0.729194	0.834948	0.641208	0.701006	0.664037	0.632864	0.90472	0.803261	0.65995
	0.633401	0.760397	0.689313	0.753971	0.613024	0.694971	0.648062	0.613554	0.893059	0.758967	0.658093
	0.638004	0.757639	0.74794	0.850446	0.63167	0.703448	0.648699	0.609568	0.90162	0.799728	0.692358
	0.641993	0.724986	0.703881	0.7253	0.586202	0.641667	0.639388	0.602965	0.878852	0.719022	0.660786
	0.643589	0.781247	0.716537	0.753971	0.61539	0.669109	0.654383	0.605706	0.889664	0.808424	0.669236
	0.641441	0.735025	0.690746	0.750872	0.602266	0.639224	0.642084	0.604958	0.89483	0.747283	0.635714
	0.635242	0.746828	0.680239	0.724138	0.603342	0.698851	0.631646	0.606079	0.913281	0.712228	0.655678
	0.642239	0.749697	0.709493	0.85742	0.609868	0.6875	0.644485	0.613928	0.900476	0.789946	0.634321
	0.633462	0.714506	0.661731	0.716002	0.611231	0.667672	0.653501	0.596985	0.899111	0.824457	0.659114
	0.66059	0.771208	0.749373	0.901976	0.63963	0.712069	0.653599	0.645197	0.90638	0.789674	0.671836
	0.649604	0.731054	0.70197	0.700504	0.61245	0.674856	0.651051	0.602218	0.895494	0.756522	0.665521
	0.661143	0.754992	0.711522	0.862069	0.629733	0.710489	0.646347	0.597483	0.909259	0.791033	0.673322
	0.644694	0.736349	0.724299	0.924448	0.604848	0.713649	0.633704	0.58976	0.91579	0.777989	0.644257
	0.627263	0.742085	0.706866	0.803177	0.589286	0.65704	0.643946	0.613554	0.895199	0.725815	0.622063
	0.645983	0.753999	0.69791	0.846571	0.624498	0.70546	0.65355	0.595366	0.897339	0.797826	0.665429
	0.657951	0.775179	0.735522	0.753584	0.618402	0.699713	0.65747	0.623022	0.923982	0.80788	0.673229
	0.636286	0.760949	0.729672	0.759783	0.614314	0.676006	0.647082	0.586645	0.89328	0.779348	0.640728
	0.643896	0.748263	0.712119	0.776831	0.619621	0.674856	0.631891	0.601221	0.909185	0.807337	0.662178
	0.651691	0.76139	0.673313	0.87563	0.608936	0.707902	0.648993	0.627009	0.914536	0.741576	0.663571
	0.62935	0.762714	0.707343	0.735761	0.603844	0.65431	0.641888	0.58814	0.899111	0.681522	0.642307
	0.649052	0.757419	0.73206	0.829523	0.616968	0.688937	0.649483	0.630497	0.918004	0.758424	0.667657
	0.650341	0.757198	0.739582	0.891515	0.622777	0.751868	0.635468	0.608696	0.900365	0.776359	0.664407
	0.63561	0.719029	0.70794	0.814026	0.616896	0.656609	0.640663	0.635107	0.907856	0.787772	0.655214
	0.616768	0.710645	0.665075	0.71019	0.617111	0.659339	0.6339	0.562103	0.879184	0.747011	0.635435
	0.650709	0.74396	0.718328	0.87253	0.61539	0.69569	0.634243	0.611561	0.900919	0.81413	0.649735
	0.651384	0.765913	0.689194	0.866718	0.612306	0.728161	0.651737	0.608197	0.898779	0.780707	0.672672
	0.668938	0.730612	0.698507	0.771406	0.608362	0.686925	0.637526	0.580665	0.900402	0.705707	0.647228
	0.621126	0.734142	0.716537	0.851608	0.61955	0.675718	0.637379	0.614675	0.91055	0.761413	0.640264
	0.654637	0.742967	0.713433	0.732662	0.591509	0.672845	0.639241	0.572568	0.898483	0.721467	0.634599
	0.634444	0.746277	0.735164	0.803177	0.602912	0.665374	0.649581	0.606079	0.891288	0.765217	0.659857
	0.632296	0.742857	0.723463	0.808989	0.619119	0.719684	0.6413	0.595864	0.913798	0.75625	0.660043
	0.635058	0.737783	0.700299	0.835723	0.626004	0.707902	0.628804	0.608446	0.898041	0.793207	0.634321
	0.6307	0.735687	0.678567	0.764432	0.577022	0.652443	0.641839	0.586271	0.897118	0.747283	0.636549
	0.643405	0.762824	0.716657	0.844246	0.59868	0.688937	0.630029	0.611436	0.90317	0.795924	0.654935
	0.66501	0.750028	0.715104	0.839597	0.605565	0.688218	0.650904	0.621278	0.897229	0.833152	0.669329
	0.644387	0.73348	0.711881	0.805889	0.613812	0.65546	0.638996	0.634857	0.908484	0.798641	0.6801
	0.650709	0.737452	0.726806	0.879504	0.615892	0.704885	0.635174	0.652049	0.907819	0.8125	0.651035
	0.636592	0.715168	0.699104	0.788454	0.614243	0.694253	0.643897	0.607699	0.885383	0.765217	0.658836
	0.640766	0.757088	0.720358	0.821	0.612163	0.674856	0.648307	0.573066	0.901768	0.722283	0.638035
	0.641134	0.756315	0.704955	0.879117	0.608649	0.695833	0.639486	0.606952	0.898373	0.819837	0.652057
	0.655312	0.761169	0.724896	0.788842	0.630235	0.682759	0.646396	0.609319	0.896159	0.729891	0.648992
	0.640029	0.762162	0.709851	0.876404	0.604776	0.675431	0.620179	0.640588	0.886896	0.73913	0.661993
	0.642791	0.734915	0.680358	0.712127	0.604633	0.642529	0.62258	0.564221	0.878409	0.670652	0.624292
	0.636531	0.729178	0.709851	0.736924	0.569349	0.630029	0.628461	0.626635	0.88638	0.732337	0.630049
	0.651875	0.707667	0.682388	0.723363	0.591796	0.620546	0.617925	0.567211	0.895273	0.749728	0.615749
	0.642546	0.747601	0.694448	0.658272	0.592441	0.654598	0.632724	0.570325	0.889848	0.711957	0.657443
	0.65255	0.722449	0.689075	0.732274	0.613239	0.690948	0.635223	0.611312	0.893502	0.752174	0.629492
	0.647947	0.780474	0.724179	0.903913	0.611661	0.67069	0.640908	0.650181	0.895605	0.784511	0.659486
	0.600565	0.746939	0.686328	0.727625	0.595597	0.685345	0.630176	0.575807	0.88376	0.734239	0.637571
	0.647149	0.727192	0.68406	0.83921	0.60033	0.71796	0.6511	0.622649	0.896417	0.795109	0.616956
	0.65832	0.75797	0.702687	0.797365	0.608075	0.7	0.634684	0.617292	0.893539	0.801359	0.670536
	0.65163	0.776724	0.730507	0.867881	0.613454	0.682471	0.630666	0.605581	0.892542	0.713587	0.663107
	0.641687	0.731936	0.712836	0.800852	0.614601	0.689943	0.617484	0.555874	0.895826	0.789402	0.646578
	0.640827	0.788969	0.738388	0.830686	0.610227	0.698132	0.637232	0.681575	0.904351	0.822011	0.664686
	0.656969	0.782129	0.722507	0.788842	0.605422	0.728305	0.635076	0.601968	0.910809	0.752717	0.631071
	0.639907	0.704468	0.716418	0.731112	0.604418	0.70977	0.627677	0.610191	0.893206	0.72337	0.637757
	0.633462	0.764479	0.703045	0.737699	0.5999	0.656034	0.63439	0.604834	0.894129	0.768478	0.627449
	0.645799	0.735025	0.725015	0.793878	0.614745	0.69023	0.635909	0.597608	0.904757	0.841848	0.683815
	0.637574	0.729288	0.715343	0.879504	0.606999	0.685632	0.638163	0.589137	0.884571	0.711141	0.630699
	0.641993	0.738224	0.716179	0.916699	0.607143	0.693247	0.641692	0.630746	0.891324	0.782337	0.665057
	0.628552	0.708549	0.672239	0.746997	0.5857	0.66954	0.625668	0.561978	0.887671	0.740761	0.622899
	0.621555	0.753447	0.677015	0.672608	0.586059	0.650431	0.621747	0.571446	0.88911	0.772554	0.629678
	0.636163	0.690458	0.685254	0.712902	0.602194	0.663649	0.618905	0.573564	0.876453	0.725815	0.595041
	0.624747	0.681964	0.68394	0.699341	0.589931	0.649856	0.624639	0.560234	0.881878	0.695109	0.619835
	0.641748	0.744291	0.742448	0.808601	0.606282	0.690374	0.646837	0.618911	0.879221	0.825815	0.658278
	0.647333	0.735356	0.699701	0.841534	0.59366	0.672845	0.64571	0.609817	0.881767	0.766576	0.655957
	0.665194	0.78257	0.752716	0.895002	0.615605	0.738218	0.635958	0.655538	0.898004	0.824728	0.688829
	0.623397	0.707336	0.683343	0.76637	0.587278	0.657759	0.623757	0.565591	0.88125	0.697283	0.629028
	0.638925	0.746277	0.689194	0.788842	0.591294	0.681609	0.624492	0.599228	0.892653	0.836141	0.635806
	0.630455	0.745946	0.713791	0.848508	0.613167	0.69023	0.613662	0.599103	0.889701	0.783696	0.6593
	0.637943	0.794815	0.722627	0.834173	0.634466	0.706609	0.648748	0.602591	0.897782	0.844565	0.669514
	0.655926	0.714617	0.708776	0.788454	0.585772	0.723563	0.617631	0.588888	0.912543	0.7625	0.61872
	0.665623	0.718257	0.706507	0.768694	0.613526	0.647989	0.617043	0.622026	0.901103	0.727446	0.658557
	0.627754	0.707777	0.667104	0.735374	0.600545	0.659626	0.627383	0.623396	0.893391	0.723913	0.628749
	0.635672	0.744181	0.673672	0.806664	0.595382	0.684483	0.603665	0.606204	0.90269	0.741304	0.638964
	0.63156	0.723993	0.693254	0.720263	0.595812	0.670977	0.607831	0.559238	0.881213	0.746196	0.637385
	0.642239	0.7262	0.675224	0.745448	0.596099	0.706034	0.611996	0.592127	0.890365	0.796196	0.645371
	0.66415	0.751793	0.714866	0.83766	0.60492	0.709626	0.634635	0.598978	0.894018	0.80163	0.675457
	0.645369	0.709763	0.68406	0.831073	0.606856	0.703161	0.642035	0.577302	0.893465	0.691033	0.633949
	0.635917	0.73348	0.712716	0.756296	0.588712	0.643103	0.621355	0.604335	0.883058	0.748098	0.618906
	0.613699	0.747601	0.66603	0.656335	0.584481	0.65158	0.610183	0.574436	0.887302	0.65	0.636271
	0.622353	0.749366	0.718448	0.794266	0.594234	0.695402	0.637183	0.60309	0.900255	0.76875	0.640171
	0.635181	0.7508	0.700537	0.876404	0.591796	0.679598	0.622875	0.583655	0.891177	0.792391	0.632092
	0.640582	0.757529	0.674149	0.853933	0.61833	0.691523	0.634292	0.590133	0.900808	0.812228	0.645371
	0.62487	0.745615	0.717493	0.755134	0.583333	0.678448	0.62704	0.580665	0.885568	0.703261	0.632928
	0.628614	0.718367	0.675343	0.781093	0.586632	0.668678	0.613025	0.608197	0.887929	0.747554	0.621228
	0.644694	0.716933	0.666388	0.838047	0.614171	0.672414	0.617386	0.57045	0.902801	0.738859	0.642492
	0.628429	0.711418	0.677134	0.790391	0.619334	0.669828	0.629098	0.578921	0.880955	0.716033	0.650385
	0.632603	0.719581	0.690149	0.781093	0.61704	0.672989	0.657225	0.607948	0.882247	0.785054	0.642028
	0.64273	0.726089	0.700537	0.79814	0.600904	0.674425	0.622433	0.597857	0.897266	0.738043	0.638871
	0.648254	0.754661	0.697313	0.893065	0.611374	0.688937	0.623365	0.63847	0.888188	0.722283	0.61612
	0.622783	0.702151	0.672716	0.685393	0.559811	0.662213	0.602587	0.559362	0.899664	0.697283	0.592998
	0.625913	0.747932	0.680716	0.841147	0.604991	0.690661	0.610183	0.605457	0.895863	0.775543	0.654471
	0.649911	0.735356	0.719761	0.842697	0.601477	0.688506	0.614887	0.592002	0.885236	0.812228	0.671557
	0.616768	0.705902	0.674269	0.850058	0.586919	0.664799	0.612976	0.598231	0.891878	0.739946	0.645742
	0.631437	0.707005	0.672836	0.743898	0.588999	0.650144	0.605773	0.564719	0.892026	0.782337	0.638407
	0.615172	0.711528	0.660537	0.72995	0.583405	0.674713	0.624345	0.559487	0.889922	0.714402	0.620485
	0.620942	0.700055	0.695761	0.80124	0.586561	0.656178	0.619689	0.583904	0.890955	0.764674	0.655678
	0.642055	0.746167	0.69003	0.778768	0.600115	0.671695	0.63194	0.614426	0.888852	0.845924	0.643885
	0.643467	0.724876	0.677373	0.847346	0.589501	0.635057	0.621404	0.58216	0.895199	0.752174	0.625406
	0.607071	0.709101	0.652537	0.71019	0.592656	0.641667	0.613172	0.561355	0.884018	0.642663	0.613985
	0.636101	0.707005	0.675701	0.793491	0.582616	0.724713	0.622482	0.59549	0.896712	0.840761	0.642214
	0.643467	0.711418	0.658746	0.727238	0.575731	0.612644	0.61131	0.608197	0.881213	0.805163	0.620299
	0.626772	0.728847	0.692896	0.687718	0.602481	0.607902	0.633018	0.586147	0.886232	0.738315	0.632464
	0.659486	0.73701	0.682388	0.738473	0.616322	0.69842	0.62704	0.634982	0.896269	0.801359	0.658
	0.622292	0.721456	0.645493	0.710577	0.591437	0.625862	0.61866	0.590507	0.887929	0.719837	0.615285
	0.59412	0.690458	0.678567	0.621852	0.546472	0.600862	0.599059	0.530958	0.872984	0.593478	0.595598
	0.652612	0.72995	0.697313	0.762495	0.609868	0.655172	0.624394	0.597608	0.89162	0.831793	0.623456
	0.615234	0.704026	0.673672	0.734212	0.562321	0.676868	0.618464	0.55114	0.882025	0.732337	0.616492
	0.650709	0.721566	0.72	0.820225	0.58405	0.686207	0.623022	0.591379	0.89269	0.795109	0.645
	0.631928	0.733039	0.68191	0.724138	0.618546	0.697989	0.630225	0.608322	0.88494	0.741576	0.616863
	0.618241	0.713955	0.67606	0.710965	0.588497	0.645546	0.605675	0.609069	0.879737	0.670924	0.628935
	0.647579	0.738776	0.703642	0.814413	0.598107	0.666092	0.61719	0.581786	0.882542	0.76875	0.643421
	0.619346	0.7123	0.669612	0.746997	0.579461	0.645259	0.613466	0.591753	0.875088	0.64538	0.640264
	0.62622	0.726972	0.661612	0.733049	0.57064	0.658477	0.597393	0.572692	0.870438	0.70625	0.629956
	0.639968	0.718367	0.718448	0.795428	0.586202	0.670546	0.617386	0.607325	0.892321	0.721467	0.640821
	0.621555	0.724986	0.673672	0.788067	0.576162	0.688362	0.60195	0.59113	0.894609	0.750272	0.619742
	0.626465	0.758853	0.715104	0.882991	0.586274	0.676149	0.628265	0.597857	0.88387	0.744022	0.635899
	0.626649	0.709432	0.692537	0.790779	0.60033	0.703736	0.625325	0.627258	0.888335	0.747283	0.634506
	0.609219	0.718478	0.670567	0.729562	0.581971	0.617241	0.606508	0.571322	0.877745	0.717935	0.613056
	0.64494	0.720353	0.704478	0.809376	0.606856	0.686207	0.614201	0.588888	0.881804	0.766304	0.631721
	0.619346	0.730943	0.664836	0.781867	0.585055	0.669828	0.603322	0.581039	0.870992	0.713043	0.633114
	0.619162	0.684942	0.677373	0.831461	0.59366	0.689511	0.60097	0.580042	0.888114	0.728261	0.625406
	0.623826	0.706564	0.65994	0.698179	0.575947	0.654167	0.604449	0.596861	0.883022	0.717663	0.620299
	0.627202	0.744402	0.665075	0.681906	0.59323	0.663075	0.60489	0.570823	0.886306	0.734783	0.643328
	0.62401	0.692223	0.654328	0.788454	0.576807	0.675287	0.603077	0.59113	0.883095	0.720652	0.626521
	0.596759	0.704909	0.665313	0.706703	0.566624	0.636207	0.617974	0.602218	0.880291	0.725815	0.589377
	0.644203	0.744512	0.67797	0.817125	0.599254	0.659483	0.604106	0.615049	0.909628	0.787228	0.651035
	0.613822	0.729288	0.664	0.693917	0.587851	0.645977	0.607733	0.603712	0.890476	0.822283	0.621042
	0.621555	0.723883	0.656597	0.79814	0.590577	0.654598	0.604694	0.581786	0.872505	0.707337	0.624571
	0.63426	0.742747	0.70006	0.818287	0.603199	0.691379	0.634586	0.63548	0.907967	0.870109	0.656607
	0.618241	0.707226	0.666388	0.760558	0.592011	0.698707	0.604155	0.565342	0.887671	0.713587	0.621042
	0.627693	0.712631	0.660896	0.786129	0.578385	0.661638	0.59558	0.572817	0.889664	0.76712	0.621878
	0.635058	0.695201	0.667463	0.758233	0.579676	0.705172	0.609644	0.57643	0.887671	0.665217	0.632185
	0.630516	0.710645	0.685134	0.752809	0.608577	0.718103	0.609595	0.607201	0.899996	0.733696	0.631814
	0.623765	0.709873	0.627104	0.71174	0.58111	0.650287	0.611996	0.591504	0.880438	0.733696	0.623828
	0.61327	0.691671	0.669254	0.80279	0.577596	0.668247	0.613466	0.570699	0.875936	0.776902	0.61677
	0.621924	0.721236	0.682746	0.811701	0.595955	0.699713	0.595237	0.619285	0.902137	0.727717	0.626985
	0.640091	0.742637	0.692657	0.790004	0.603916	0.678448	0.609154	0.60882	0.900771	0.801087	0.635156
	0.625115	0.714396	0.676418	0.793878	0.57566	0.612787	0.606655	0.560857	0.884682	0.7	0.622806
	0.638863	0.738334	0.718687	0.83611	0.58154	0.693103	0.607047	0.598356	0.898557	0.863587	0.622899
	0.618548	0.70535	0.715701	0.76482	0.601406	0.628017	0.590141	0.560359	0.892136	0.713315	0.637014
	0.61327	0.698952	0.672119	0.729175	0.587349	0.638649	0.600235	0.564968	0.870844	0.727174	0.625406
	0.64586	0.724545	0.70997	0.868656	0.576234	0.66954	0.601068	0.596238	0.893169	0.742391	0.652428
	0.630884	0.721677	0.648119	0.798528	0.600402	0.649856	0.620228	0.617541	0.894867	0.761413	0.637107
	0.639907	0.769112	0.721313	0.96513	0.594951	0.734483	0.64277	0.673477	0.911436	0.845652	0.650571
	0.632419	0.685714	0.651463	0.683843	0.593158	0.648563	0.607194	0.590881	0.88018	0.741576	0.61872
	0.611612	0.681081	0.645015	0.674157	0.563181	0.622557	0.593522	0.592625	0.876933	0.697011	0.580091
	0.623519	0.713624	0.72203	0.832623	0.580034	0.677299	0.596119	0.575184	0.891324	0.814946	0.613985
	0.621617	0.71241	0.669134	0.8148	0.589142	0.617816	0.60195	0.610689	0.885051	0.770652	0.632464
	0.642178	0.738334	0.684896	0.809764	0.60578	0.661207	0.612829	0.612433	0.888077	0.805978	0.645185
	0.631866	0.716492	0.682985	0.85277	0.626936	0.693391	0.621355	0.591255	0.89745	0.788315	0.642957
	0.63248	0.721566	0.680239	0.812088	0.618689	0.731322	0.622727	0.629127	0.887893	0.825	0.658464
	0.619591	0.725317	0.641433	0.822549	0.591222	0.69023	0.605283	0.574187	0.888704	0.741576	0.594763
	0.630025	0.671815	0.620896	0.685393	0.577094	0.678161	0.60195	0.587393	0.876342	0.732609	0.591884
	0.635058	0.730392	0.665313	0.757458	0.612163	0.722126	0.61425	0.586271	0.886896	0.729076	0.639799
	0.649113	0.71914	0.71403	0.805889	0.580321	0.678448	0.606508	0.593746	0.882689	0.762772	0.627728
	0.631375	0.727523	0.697791	0.839985	0.57609	0.690517	0.612535	0.603463	0.87959	0.840217	0.622435
	0.64095	0.679537	0.685731	0.806277	0.589429	0.638506	0.60195	0.58677	0.883649	0.726359	0.619185
	0.631253	0.716271	0.653851	0.751259	0.586202	0.643103	0.604204	0.590756	0.88387	0.7375	0.641285
	0.635119	0.726531	0.678687	0.821	0.596816	0.673994	0.596511	0.583655	0.879774	0.767391	0.615749
	0.634628	0.758191	0.701015	0.721426	0.616753	0.675287	0.613466	0.621652	0.883649	0.74212	0.636456
	0.631744	0.709763	0.690149	0.776831	0.577883	0.694253	0.602048	0.572941	0.8728	0.749457	0.628842
	0.617443	0.666189	0.644776	0.697792	0.57358	0.604454	0.581516	0.560857	0.870069	0.644293	0.613985
	0.638986	0.744953	0.689552	0.706703	0.609223	0.679741	0.607047	0.59549	0.862689	0.747283	0.641007
	0.618855	0.701048	0.672	0.699341	0.5857	0.636063	0.59411	0.558116	0.869737	0.71413	0.612592
	0.630332	0.713844	0.658149	0.713289	0.592154	0.667241	0.602293	0.599601	0.875457	0.753804	0.633485
	0.630393	0.703585	0.661493	0.755521	0.584696	0.667529	0.590925	0.578797	0.870438	0.690761	0.61937
	0.618671	0.702372	0.656955	0.649748	0.569492	0.641954	0.586269	0.540177	0.862615	0.702989	0.599963
	0.613024	0.701379	0.627343	0.722588	0.574082	0.613649	0.589504	0.56584	0.849146	0.6625	0.610363
	0.628982	0.75102	0.711881	0.855482	0.594378	0.678879	0.597344	0.608446	0.878667	0.809511	0.631442
	0.624317	0.703254	0.649313	0.764045	0.590003	0.614799	0.602734	0.582409	0.873612	0.696196	0.629771
	0.630823	0.691451	0.635821	0.740798	0.587063	0.673851	0.586416	0.60147	0.874313	0.739946	0.621506
	0.616707	0.727965	0.656239	0.632313	0.595453	0.676293	0.597344	0.603214	0.874719	0.738859	0.615563
	0.606702	0.683949	0.631284	0.690818	0.57903	0.600862	0.58823	0.594743	0.863943	0.672011	0.606927
	0.627325	0.677551	0.616358	0.712127	0.5786	0.623563	0.581124	0.55251	0.867781	0.721467	0.591513
	0.627079	0.698069	0.646448	0.713677	0.595668	0.645402	0.594698	0.60583	0.85922	0.717935	0.601727
	0.615049	0.704909	0.64191	0.7253	0.58154	0.668822	0.584358	0.562227	0.859884	0.7125	0.615099
	0.62935	0.719029	0.663642	0.714452	0.587708	0.648707	0.599598	0.586396	0.874719	0.697826	0.617699
	0.621678	0.657033	0.643701	0.702441	0.563683	0.588362	0.586367	0.566962	0.8635	0.707337	0.600891
	0.617259	0.710535	0.639403	0.791554	0.589644	0.612213	0.588181	0.573315	0.868814	0.652717	0.599313
	0.625606	0.663541	0.668896	0.727238	0.581038	0.668678	0.604645	0.589137	0.868482	0.668207	0.625035
	0.601731	0.656812	0.653373	0.697792	0.532559	0.627443	0.561474	0.510153	0.859109	0.706522	0.579255
	0.609955	0.682074	0.633552	0.617978	0.574154	0.635489	0.579948	0.55251	0.860844	0.65625	0.586127
	0.629411	0.720132	0.681791	0.788842	0.586202	0.657328	0.586857	0.581413	0.877745	0.740761	0.615842
	0.616031	0.721566	0.698985	0.830298	0.581038	0.690805	0.587102	0.606578	0.86649	0.760326	0.629771
	0.646167	0.742747	0.704597	0.851995	0.604131	0.712931	0.607586	0.630248	0.886896	0.759783	0.630885
	0.609341	0.697959	0.665194	0.702828	0.555293	0.635201	0.585191	0.578049	0.880365	0.714402	0.629771
	0.617443	0.723773	0.666388	0.68733	0.600975	0.665517	0.57936	0.566214	0.881804	0.728533	0.625035
	0.640214	0.707777	0.674985	0.733437	0.604633	0.645546	0.581516	0.617167	0.88232	0.763587	0.638314
	0.634997	0.70866	0.648836	0.722976	0.578528	0.638218	0.591268	0.556746	0.870623	0.699728	0.618349
	0.625852	0.696194	0.669254	0.651685	0.587851	0.639943	0.601999	0.592127	0.864866	0.718478	0.620485
	0.634137	0.688693	0.683701	0.790779	0.569134	0.647414	0.588181	0.592002	0.884424	0.666033	0.645742
	0.640827	0.710976	0.634746	0.76327	0.579604	0.688506	0.592934	0.613554	0.883095	0.755435	0.626613
	0.600135	0.695091	0.65791	0.707478	0.584696	0.668966	0.586073	0.584029	0.869073	0.745652	0.605349
	0.629841	0.727192	0.647403	0.788067	0.605637	0.640661	0.586269	0.581537	0.884977	0.786685	0.635342
	0.61597	0.724986	0.678925	0.763657	0.58319	0.67069	0.590925	0.587766	0.876232	0.793478	0.621506
	0.634812	0.695201	0.669373	0.792329	0.588067	0.656897	0.596266	0.576803	0.880217	0.786957	0.632092
	0.625176	0.695312	0.663045	0.727625	0.579174	0.658477	0.584652	0.55712	0.866416	0.741576	0.618535
	0.64273	0.698842	0.682627	0.862456	0.592656	0.648851	0.599304	0.591255	0.874571	0.85163	0.66125
	0.627509	0.721456	0.639522	0.857032	0.563898	0.66408	0.595531	0.569453	0.857596	0.700815	0.606742
	0.633033	0.72642	0.69409	0.813251	0.598035	0.669109	0.581026	0.582285	0.867264	0.791848	0.632464
	0.622108	0.674242	0.652179	0.689655	0.59029	0.610632	0.58377	0.597982	0.864829	0.634511	0.598849
	0.622415	0.721456	0.652299	0.702441	0.575229	0.652586	0.574999	0.586147	0.86767	0.742391	0.647042
	0.625176	0.687369	0.633433	0.780318	0.60284	0.66408	0.585975	0.572568	0.86767	0.72962	0.606184
	0.6396	0.683729	0.688239	0.786517	0.589859	0.674856	0.568383	0.571197	0.871397	0.650272	0.620206
	0.613085	0.737783	0.623522	0.762108	0.560815	0.636925	0.600578	0.580042	0.876674	0.666848	0.623363
	0.630148	0.719912	0.677373	0.783805	0.593804	0.627874	0.593473	0.591005	0.870327	0.724728	0.615842
	0.64052	0.73701	0.700299	0.847346	0.617326	0.707328	0.603959	0.595864	0.880438	0.824457	0.633949
	0.618732	0.721566	0.657791	0.754746	0.570711	0.629023	0.571814	0.548773	0.86339	0.696196	0.616585
	0.636777	0.673359	0.68394	0.760945	0.588067	0.681466	0.58774	0.612682	0.873648	0.730163	0.626242
	0.629902	0.721125	0.66997	0.825649	0.597748	0.690661	0.579115	0.590507	0.870844	0.782337	0.605349
	0.622046	0.682295	0.677254	0.706315	0.571931	0.593247	0.56706	0.552137	0.870143	0.696739	0.635435
	0.622537	0.695863	0.645134	0.669895	0.590075	0.633621	0.574509	0.577426	0.87649	0.668478	0.631721
	0.634751	0.666299	0.667701	0.889965	0.584409	0.655891	0.588034	0.571571	0.883464	0.746739	0.601449
	0.612103	0.713293	0.67391	0.764432	0.572719	0.682615	0.584554	0.584278	0.872025	0.704891	0.606092
	0.621617	0.670712	0.624119	0.724525	0.573508	0.635345	0.556427	0.561106	0.85612	0.693478	0.61027
	0.619468	0.717816	0.656478	0.812863	0.57817	0.64296	0.581271	0.565591	0.873685	0.752717	0.624106
	0.641257	0.741644	0.704119	0.815188	0.587134	0.67931	0.598863	0.641958	0.891509	0.80163	0.62002
	0.649481	0.719691	0.673672	0.886091	0.602123	0.682328	0.60097	0.583904	0.874202	0.776087	0.594577
	0.604124	0.658356	0.629373	0.667183	0.570066	0.604598	0.577155	0.553756	0.858703	0.671467	0.601077
	0.620451	0.661224	0.645612	0.707478	0.574225	0.624138	0.573137	0.546281	0.862209	0.670924	0.590677
	0.614927	0.682736	0.653015	0.856257	0.586274	0.665086	0.581565	0.609817	0.871028	0.700815	0.620856
	0.616338	0.62802	0.613731	0.636188	0.562392	0.638506	0.567746	0.541796	0.847153	0.639674	0.59792
	0.639477	0.710866	0.650746	0.770632	0.591796	0.694828	0.597344	0.622524	0.875235	0.784511	0.61742
	0.622783	0.694981	0.656955	0.69353	0.576234	0.63204	0.593963	0.575557	0.865825	0.799185	0.598199
	0.620757	0.685604	0.665194	0.698954	0.575301	0.630172	0.595727	0.593372	0.858445	0.606793	0.580648
	0.618548	0.698511	0.667104	0.780318	0.580178	0.646839	0.593032	0.593871	0.882357	0.720652	0.618535
	0.621739	0.671704	0.64597	0.765982	0.595597	0.670115	0.59166	0.575308	0.871582	0.68125	0.617978
	0.633708	0.70513	0.669254	0.779543	0.586704	0.666379	0.592101	0.602591	0.860954	0.734783	0.603863
	0.623949	0.691782	0.638925	0.737699	0.565978	0.642529	0.576714	0.57618	0.855235	0.733967	0.617235
	0.621494	0.699614	0.659701	0.773731	0.576736	0.664511	0.565541	0.581164	0.857559	0.715217	0.612963
	0.6164	0.674683	0.616239	0.622239	0.57107	0.671983	0.59313	0.571197	0.85981	0.74837	0.583434
	0.640029	0.698952	0.693731	0.849671	0.586059	0.688075	0.582447	0.580416	0.870438	0.777174	0.645742
	0.631437	0.7262	0.667104	0.83301	0.61037	0.673994	0.583574	0.598854	0.87553	0.750272	0.630978
	0.610139	0.676007	0.623881	0.602867	0.565763	0.638649	0.572598	0.554254	0.858224	0.692391	0.59142
	0.625913	0.694208	0.655164	0.741573	0.576664	0.597989	0.581026	0.585275	0.85195	0.722283	0.60507
	0.615725	0.699393	0.683463	0.714839	0.57652	0.663937	0.586857	0.556995	0.862762	0.726087	0.617978
	0.628798	0.71914	0.686209	0.798915	0.59115	0.647989	0.59558	0.61343	0.881582	0.75462	0.624756
1.5	0.627938	0.692223	0.674269	0.753196	0.576736	0.667098	0.579605	0.595241	0.860253	0.754076	0.639149
	0.621801	0.659459	0.646448	0.705153	0.574727	0.650431	0.578037	0.587766	0.873944	0.684239	0.598013
	0.604002	0.67016	0.637015	0.804727	0.574584	0.656178	0.579164	0.566214	0.872578	0.664674	0.611199
	0.642546	0.663762	0.663642	0.79659	0.572504	0.65158	0.592787	0.616669	0.881582	0.711685	0.635249
	0.623826	0.690347	0.635821	0.709028	0.573508	0.704741	0.578968	0.607076	0.877265	0.771739	0.615285
	0.621617	0.688472	0.645493	0.709415	0.577955	0.638793	0.57054	0.574436	0.857707	0.636141	0.62197
	0.626649	0.68064	0.64394	0.743123	0.596529	0.67227	0.577351	0.613679	0.871065	0.625	0.608413
	0.630516	0.691009	0.693015	0.765207	0.573221	0.646552	0.584358	0.600723	0.865124	0.73288	0.643421
	0.62444	0.711087	0.633194	0.726075	0.572074	0.673707	0.577155	0.565965	0.866453	0.726359	0.627171
	0.626649	0.690237	0.694328	0.874855	0.58864	0.702299	0.58377	0.592251	0.868113	0.747554	0.610177
	0.618609	0.691561	0.626985	0.677257	0.580895	0.601437	0.583329	0.561729	0.841655	0.691033	0.580741
	0.614497	0.670381	0.648358	0.685006	0.582401	0.628305	0.57201	0.599477	0.865198	0.762772	0.597549
	0.642055	0.647325	0.645015	0.737311	0.565835	0.614511	0.571716	0.558241	0.862947	0.742935	0.618628
	0.625483	0.684501	0.663403	0.777993	0.565118	0.650575	0.567991	0.577675	0.856747	0.698098	0.617049
	0.627938	0.664313	0.655642	0.722201	0.578457	0.659626	0.582104	0.551638	0.862357	0.780163	0.609527
	0.627509	0.713514	0.662925	0.78303	0.590792	0.68046	0.594943	0.607201	0.869405	0.799185	0.610642
	0.615786	0.701379	0.652657	0.745448	0.594736	0.656034	0.569118	0.563224	0.870401	0.724728	0.604977
	0.633217	0.700055	0.644299	0.755134	0.5928	0.664943	0.579017	0.565093	0.866895	0.652446	0.614077
	0.629227	0.695532	0.647522	0.805889	0.578457	0.675718	0.575244	0.59711	0.864423	0.749185	0.600056
	0.613515	0.67005	0.606567	0.673382	0.573221	0.625718	0.559465	0.523732	0.852947	0.691848	0.601356
	0.613822	0.679426	0.633672	0.74816	0.570353	0.604023	0.551526	0.559362	0.855567	0.666033	0.605349
	0.6164	0.641258	0.600478	0.750097	0.564114	0.631753	0.570834	0.544039	0.863722	0.636957	0.593277
	0.627018	0.683508	0.671284	0.716002	0.577883	0.640086	0.588132	0.585399	0.855604	0.774457	0.61027
	0.621678	0.705571	0.652418	0.753584	0.564687	0.59569	0.5651	0.580665	0.867966	0.67337	0.60572
	0.615663	0.690789	0.679881	0.835723	0.567197	0.642529	0.578282	0.555251	0.876268	0.688859	0.593741
	0.615356	0.664093	0.65206	0.709028	0.562823	0.646121	0.570638	0.56584	0.849625	0.698098	0.612499
	0.621985	0.647325	0.662687	0.804727	0.58319	0.618678	0.56804	0.582409	0.854902	0.738043	0.589934
	0.635119	0.679537	0.629134	0.721813	0.591222	0.672701	0.576175	0.580541	0.8728	0.717391	0.591698
	0.617811	0.651186	0.610627	0.681906	0.564902	0.599138	0.56412	0.563847	0.859257	0.702717	0.600613
	0.651323	0.731605	0.671522	0.74196	0.587421	0.669109	0.579801	0.587143	0.865862	0.702717	0.614263
	0.611612	0.647656	0.601075	0.622627	0.588855	0.629023	0.556182	0.567958	0.860548	0.593207	0.587334
	0.614988	0.681412	0.616119	0.604804	0.567915	0.645546	0.560592	0.570574	0.847559	0.651087	0.578141
	0.621862	0.680088	0.622567	0.666408	0.582831	0.624282	0.563679	0.563349	0.85826	0.709783	0.594763
	0.62223	0.653392	0.635821	0.643936	0.576951	0.619109	0.552457	0.559238	0.863353	0.70163	0.605163
	0.613699	0.682736	0.664836	0.716776	0.59868	0.649569	0.583182	0.600473	0.876822	0.652446	0.606834
	0.650157	0.672697	0.66209	0.662146	0.561604	0.671408	0.568236	0.579544	0.86243	0.723098	0.60182
	0.628	0.672918	0.654687	0.730725	0.589931	0.647126	0.565884	0.578174	0.861692	0.690217	0.599034
	0.616277	0.689465	0.660179	0.782255	0.595955	0.670259	0.57152	0.557493	0.861877	0.662228	0.603956
	0.605659	0.643464	0.670328	0.672608	0.595095	0.652155	0.571275	0.576928	0.867966	0.776359	0.616213
	0.629718	0.735025	0.643701	0.820225	0.581827	0.648994	0.57397	0.595739	0.865604	0.784239	0.615377
	0.613576	0.652289	0.650149	0.828749	0.592943	0.674282	0.562699	0.543416	0.854201	0.688859	0.624571
	0.601547	0.65979	0.619582	0.771406	0.555293	0.636207	0.549811	0.545658	0.849515	0.616848	0.569226
	0.630148	0.708991	0.689194	0.78148	0.589214	0.701149	0.567158	0.594618	0.866711	0.815217	0.617142
	0.619223	0.676889	0.625672	0.738086	0.562249	0.647989	0.560298	0.571197	0.876748	0.740217	0.610549
	0.626711	0.69476	0.628179	0.670283	0.581397	0.64569	0.545401	0.564594	0.852356	0.749457	0.599127
	0.63248	0.684501	0.628776	0.707478	0.599684	0.642385	0.573039	0.580167	0.859331	0.730707	0.612499
	0.614743	0.660452	0.660896	0.812088	0.570855	0.641667	0.5553	0.567709	0.861729	0.680435	0.628935
	0.617934	0.674903	0.655403	0.845409	0.586704	0.661063	0.552114	0.590881	0.873279	0.702446	0.622899
	0.636715	0.693878	0.664	0.757846	0.581182	0.662213	0.583966	0.548275	0.875309	0.720109	0.646207
	0.628429	0.688141	0.654925	0.694692	0.571644	0.631178	0.573529	0.569204	0.862799	0.753261	0.582227
	0.636654	0.675124	0.659701	0.867106	0.575301	0.66523	0.561719	0.597608	0.866969	0.758967	0.613613
	0.616338	0.677772	0.631642	0.765595	0.575803	0.657184	0.548488	0.561854	0.864608	0.676902	0.61482
	0.609464	0.681743	0.647403	0.805889	0.592656	0.661782	0.577008	0.573066	0.865604	0.680435	0.625313
	0.634444	0.689906	0.682627	0.771406	0.591796	0.642241	0.571912	0.596113	0.870475	0.699457	0.624199
	0.628061	0.660783	0.635463	0.768307	0.581971	0.657184	0.56902	0.5778	0.87184	0.736413	0.623456
	0.641011	0.685383	0.68203	0.833785	0.590577	0.677874	0.57054	0.60147	0.859626	0.75625	0.609992
	0.622783	0.664203	0.64394	0.768307	0.565906	0.678017	0.56412	0.570823	0.871361	0.770652	0.628378
	0.621801	0.689796	0.687045	0.888028	0.58276	0.684339	0.579017	0.611436	0.85553	0.69212	0.629585
	0.62401	0.651737	0.641194	0.771019	0.572719	0.608908	0.56314	0.556248	0.850954	0.617391	0.590213
	0.615356	0.662107	0.645015	0.798528	0.568847	0.633046	0.572598	0.582908	0.869663	0.658424	0.570805
	0.609955	0.674352	0.699224	0.860519	0.570496	0.639511	0.552654	0.562227	0.870401	0.711141	0.587798
	0.632112	0.656481	0.650149	0.77838	0.575086	0.646983	0.556133	0.590756	0.858777	0.734511	0.631164
	0.595409	0.661445	0.645134	0.734599	0.551707	0.653161	0.552654	0.615548	0.855862	0.740489	0.602377
	0.632051	0.699614	0.637731	0.782255	0.56562	0.671264	0.556917	0.59549	0.857486	0.725	0.597549
	0.617566	0.67005	0.652776	0.773731	0.544966	0.654454	0.553634	0.558988	0.859663	0.741848	0.616863
	0.619775	0.665747	0.645254	0.719876	0.568273	0.656178	0.568432	0.57344	0.866379	0.777446	0.613892
	0.624931	0.696084	0.646687	0.715227	0.56354	0.619828	0.567648	0.593497	0.857412	0.708967	0.61742
	0.624501	0.691892	0.632	0.855482	0.602481	0.63319	0.567942	0.574063	0.867744	0.792391	0.630699
	0.620573	0.648207	0.614328	0.672995	0.562608	0.655891	0.53364	0.532827	0.85564	0.680163	0.578141
	0.636286	0.700827	0.683343	0.789229	0.603485	0.66523	0.579507	0.604086	0.859441	0.748641	0.613149
	0.625361	0.672146	0.67606	0.823712	0.59488	0.68204	0.570393	0.586271	0.855788	0.817663	0.642214
	0.596821	0.627799	0.604179	0.66912	0.555364	0.609052	0.558632	0.556123	0.857412	0.657609	0.612127
	0.626588	0.690789	0.665075	0.678032	0.603772	0.653879	0.582643	0.592625	0.861028	0.766848	0.608042
	0.638434	0.662879	0.65409	0.779543	0.565261	0.635632	0.565639	0.564594	0.867375	0.814402	0.605163
	0.625606	0.669608	0.683821	0.829523	0.573365	0.687644	0.564218	0.608571	0.870217	0.761957	0.608599
	0.631253	0.663872	0.659582	0.737699	0.570998	0.655029	0.5725	0.602965	0.867228	0.78125	0.627542
	0.630271	0.665196	0.616239	0.717551	0.570855	0.679023	0.560445	0.590881	0.8535	0.77663	0.608042
	0.621924	0.672256	0.631881	0.687718	0.567484	0.649425	0.560298	0.590133	0.852319	0.711413	0.617049
	0.629105	0.69476	0.677493	0.780318	0.598035	0.684914	0.569167	0.626261	0.864755	0.752717	0.631999
	0.627877	0.710094	0.685373	0.857807	0.59782	0.673563	0.569951	0.600972	0.869995	0.734783	0.600613
	0.632848	0.681412	0.653254	0.717939	0.600545	0.65273	0.560641	0.592999	0.877597	0.803804	0.625221
	0.646413	0.706233	0.668896	0.810151	0.592585	0.658477	0.566668	0.564594	0.855308	0.765489	0.617142
	0.631007	0.677661	0.650627	0.74351	0.57566	0.644109	0.55084	0.56148	0.861028	0.736685	0.596434
	0.645615	0.696635	0.650149	0.823324	0.579102	0.698851	0.562699	0.613679	0.864091	0.750815	0.634971
	0.638372	0.679537	0.643821	0.663309	0.564974	0.66092	0.570393	0.597234	0.86339	0.799728	0.612499
	0.632664	0.678213	0.624239	0.757071	0.593373	0.65819	0.550889	0.58216	0.86088	0.761141	0.621785
	0.6307	0.665196	0.636776	0.741573	0.559811	0.634052	0.546185	0.560982	0.863796	0.717663	0.624942
	0.626956	0.669719	0.648478	0.720651	0.55142	0.627443	0.562993	0.573564	0.850917	0.629348	0.59532
	0.649911	0.662107	0.655164	0.849283	0.571213	0.647845	0.556672	0.552884	0.859515	0.752717	0.603027
	0.622599	0.649972	0.615164	0.684618	0.574943	0.646983	0.540305	0.589635	0.856932	0.706522	0.624663
	0.616952	0.650083	0.625194	0.746997	0.565548	0.632184	0.538933	0.536813	0.854718	0.606522	0.597363
	0.636224	0.670932	0.65803	0.642387	0.592298	0.650575	0.549517	0.587268	0.860069	0.748641	0.579627
	0.603265	0.629013	0.627582	0.730725	0.566767	0.661494	0.560298	0.577675	0.845714	0.697554	0.593927
	0.618118	0.678985	0.666269	0.719489	0.566552	0.65431	0.548047	0.593497	0.86387	0.69375	0.612592
	0.620451	0.665858	0.674985	0.810151	0.604418	0.689368	0.559514	0.64009	0.859921	0.697283	0.634599
	0.620082	0.655598	0.629612	0.719489	0.573867	0.651293	0.54251	0.587019	0.863796	0.695924	0.631256
	0.64451	0.672366	0.643582	0.741186	0.567054	0.647126	0.552065	0.567086	0.856268	0.71413	0.592627
	0.612349	0.637176	0.647642	0.711352	0.576736	0.668966	0.55579	0.572318	0.848703	0.736957	0.597641
	0.626711	0.651737	0.628418	0.714839	0.576162	0.641236	0.559906	0.591628	0.853943	0.692663	0.638964
	0.613454	0.664203	0.618149	0.684618	0.558878	0.622989	0.548047	0.555126	0.851323	0.701087	0.610363
	0.605782	0.644788	0.648	0.747772	0.569564	0.626868	0.538835	0.55712	0.851581	0.624728	0.593463
	0.605597	0.62802	0.617075	0.753971	0.543818	0.604454	0.536679	0.555749	0.834127	0.601087	0.575727
	0.605536	0.652841	0.615284	0.695854	0.560241	0.617529	0.544911	0.560608	0.843574	0.679891	0.623178
	0.627018	0.658577	0.642269	0.827199	0.568632	0.635489	0.548488	0.561605	0.861176	0.704891	0.602191
	0.613024	0.660673	0.624239	0.640449	0.559094	0.635345	0.527123	0.543665	0.839846	0.644022	0.57712
	0.600503	0.652289	0.625552	0.70709	0.565261	0.603879	0.543539	0.539056	0.862024	0.714674	0.590491
	0.622906	0.639603	0.645015	0.860519	0.585987	0.645833	0.565639	0.600723	0.858998	0.716033	0.607577
	0.621985	0.67016	0.654925	0.793491	0.560026	0.667816	0.555545	0.558988	0.851249	0.708152	0.627263
	0.61953	0.674793	0.632836	0.790391	0.589214	0.668534	0.539276	0.597982	0.849256	0.75462	0.592348
	0.623703	0.660563	0.621015	0.74351	0.575301	0.65977	0.555594	0.571571	0.845714	0.7125	0.593741
	0.617013	0.683067	0.656119	0.731499	0.589142	0.659339	0.563336	0.562352	0.854755	0.777989	0.620392
	0.627079	0.681081	0.612418	0.781093	0.58362	0.672701	0.547165	0.584278	0.848297	0.74375	0.609434
	0.609096	0.647546	0.64	0.676095	0.568775	0.631034	0.548488	0.566339	0.848445	0.731522	0.600427
	0.61462	0.657363	0.650866	0.790004	0.573437	0.690661	0.547606	0.576305	0.852836	0.731522	0.614449
	0.602345	0.652399	0.602269	0.714452	0.567269	0.649856	0.536924	0.537934	0.848666	0.67962	0.606649
	0.631253	0.681633	0.636657	0.745448	0.564472	0.675144	0.55481	0.569951	0.839662	0.73125	0.632278
	0.617627	0.637286	0.639045	0.777993	0.561532	0.636782	0.556868	0.5555	0.848961	0.726902	0.612035
	0.61775	0.665085	0.637493	0.739636	0.563253	0.680603	0.56069	0.569827	0.863242	0.777717	0.644721
	0.600749	0.621622	0.613731	0.601317	0.565333	0.631609	0.538345	0.584153	0.850474	0.665217	0.600241
	0.645615	0.653613	0.630806	0.812476	0.562894	0.63908	0.542608	0.561854	0.842688	0.548098	0.622899
	0.596637	0.632432	0.597015	0.593956	0.544679	0.601293	0.541089	0.521864	0.832614	0.62962	0.561426
	0.616522	0.632101	0.632716	0.724525	0.561747	0.624569	0.545009	0.555251	0.834865	0.682337	0.622528
	0.610876	0.643905	0.638209	0.718326	0.551707	0.629741	0.560494	0.561729	0.830658	0.646467	0.612499
	0.621862	0.632984	0.634746	0.758233	0.56397	0.626293	0.549468	0.594618	0.830769	0.751359	0.574334
	0.619775	0.657474	0.613731	0.621852	0.549197	0.592098	0.545254	0.546655	0.820362	0.670924	0.61222
	0.620205	0.644677	0.619463	0.683843	0.569277	0.606897	0.550203	0.544786	0.836857	0.702717	0.597641
	0.6048	0.659018	0.623045	0.719101	0.568919	0.608046	0.568775	0.562601	0.836821	0.728804	0.59922
	0.61149	0.632322	0.654806	0.788842	0.56856	0.627299	0.553487	0.571197	0.833721	0.708152	0.618442
	0.634321	0.661114	0.65206	0.780318	0.570711	0.640661	0.55579	0.585026	0.847522	0.711957	0.587241
	0.610937	0.655819	0.637134	0.69198	0.568632	0.605747	0.547851	0.595366	0.831802	0.671739	0.621135
	0.638065	0.646994	0.646687	0.799303	0.599684	0.649713	0.545303	0.584403	0.835935	0.785326	0.600427
	0.630271	0.656481	0.62997	0.654398	0.552137	0.637213	0.542118	0.577675	0.837042	0.717391	0.592906
	0.613761	0.648097	0.582328	0.721038	0.571572	0.635632	0.543098	0.574561	0.837485	0.68913	0.610549
	0.625238	0.660452	0.610149	0.667183	0.569134	0.623132	0.560788	0.584403	0.831359	0.684783	0.583527
	0.615847	0.61743	0.606448	0.698179	0.578098	0.626006	0.543784	0.584901	0.827189	0.766033	0.612499
	0.624931	0.655047	0.650388	0.807439	0.600617	0.678161	0.548341	0.565591	0.839108	0.657609	0.624013
	0.629043	0.639603	0.627701	0.881441	0.587995	0.70546	0.534767	0.558615	0.831765	0.78913	0.615099
	0.610999	0.637286	0.619701	0.631926	0.552711	0.598851	0.540109	0.546655	0.815454	0.657065	0.566812
	0.606334	0.627468	0.613851	0.728787	0.550416	0.614655	0.547116	0.565467	0.829846	0.59538	0.616492
	0.618118	0.650414	0.635224	0.752422	0.589788	0.63908	0.561915	0.59549	0.830547	0.753261	0.594577
	0.597496	0.62791	0.618627	0.676482	0.574441	0.610201	0.534179	0.558366	0.814163	0.641576	0.607763
	0.614865	0.651407	0.634149	0.722588	0.561245	0.604167	0.548537	0.558615	0.82372	0.708424	0.585941
	0.630455	0.627358	0.645851	0.750484	0.572361	0.626149	0.54153	0.586396	0.818739	0.646196	0.573591
	0.595777	0.639603	0.602149	0.627664	0.563755	0.607471	0.547557	0.555126	0.814052	0.738859	0.601077
	0.610692	0.628571	0.630806	0.74661	0.562894	0.629454	0.548586	0.581911	0.822724	0.666848	0.597363
	0.624317	0.687038	0.653373	0.937621	0.58527	0.67069	0.566178	0.612433	0.838924	0.784239	0.621506
	0.603388	0.636404	0.617552	0.676869	0.567341	0.623994	0.544078	0.533574	0.824827	0.677174	0.566719
	0.594304	0.643905	0.597373	0.709028	0.568273	0.619684	0.536728	0.579295	0.823757	0.671196	0.582598
	0.606273	0.620739	0.620896	0.681906	0.545037	0.585201	0.543735	0.524978	0.816783	0.607337	0.595134
	0.621985	0.644236	0.651224	0.687718	0.570425	0.640374	0.5307	0.561605	0.83575	0.741304	0.615006
	0.607193	0.583343	0.626746	0.722588	0.568847	0.639368	0.53663	0.564096	0.821912	0.737772	0.595041
	0.6423	0.638389	0.644776	0.728012	0.55601	0.681897	0.542167	0.585399	0.830215	0.666848	0.622435
	0.636101	0.668505	0.643582	0.726463	0.577022	0.680316	0.552899	0.596238	0.828333	0.771739	0.607577
	0.598846	0.6631	0.633552	0.698566	0.570209	0.622126	0.540109	0.551389	0.835234	0.772826	0.596806
	0.611244	0.657805	0.610388	0.716389	0.56648	0.647414	0.552163	0.557369	0.82778	0.746467	0.59012
	0.604186	0.653061	0.578746	0.683456	0.564974	0.599713	0.543392	0.559985	0.81848	0.593478	0.579348
	0.626895	0.646001	0.611701	0.659047	0.579174	0.64296	0.559122	0.548648	0.831175	0.740217	0.58427
	0.604984	0.639272	0.643821	0.784967	0.566552	0.633333	0.555496	0.554504	0.833093	0.64538	0.608506
	0.635365	0.621401	0.627582	0.716389	0.576018	0.631322	0.551673	0.542046	0.817447	0.730435	0.594484
	0.636163	0.660342	0.658627	0.885316	0.587995	0.704741	0.563826	0.592625	0.834606	0.770924	0.619556
	0.611858	0.655157	0.605493	0.612553	0.586561	0.632471	0.543147	0.564844	0.815713	0.691848	0.593277
	0.619837	0.654054	0.650388	0.770632	0.556297	0.656466	0.558779	0.527719	0.830695	0.728804	0.622528
	0.623335	0.62449	0.598806	0.796203	0.555364	0.597989	0.551085	0.554254	0.829329	0.598641	0.596434
	0.625238	0.658798	0.648716	0.705928	0.584122	0.633046	0.561523	0.581911	0.833721	0.694565	0.633206
	0.601854	0.632212	0.607522	0.668346	0.555077	0.624713	0.545205	0.534073	0.816045	0.681793	0.602656
	0.623765	0.614451	0.58603	0.626501	0.554145	0.628879	0.554467	0.544288	0.826709	0.622283	0.607299
	0.600442	0.653392	0.589612	0.686168	0.554073	0.600287	0.553487	0.569702	0.824274	0.691576	0.563562
	0.61732	0.638831	0.649672	0.72375	0.554719	0.645833	0.551379	0.564719	0.826488	0.702717	0.600891
	0.626343	0.667071	0.640836	0.815963	0.551133	0.644397	0.568138	0.591005	0.826857	0.674185	0.600149
	0.606886	0.629454	0.616478	0.756296	0.563827	0.634339	0.532758	0.579669	0.814015	0.728261	0.605163
	0.616891	0.625372	0.628896	0.740411	0.533491	0.586494	0.540942	0.52149	0.815085	0.619837	0.559662
	0.640398	0.677992	0.636179	0.809376	0.589573	0.656034	0.563336	0.580665	0.841101	0.803533	0.637478
	0.634751	0.643685	0.613015	0.720263	0.541882	0.634483	0.550938	0.568706	0.811137	0.646467	0.605813
	0.646781	0.664534	0.63009	0.853545	0.579532	0.67227	0.557211	0.594743	0.838961	0.725543	0.622342
	0.613761	0.653061	0.657194	0.777606	0.575947	0.652443	0.551085	0.561978	0.837042	0.750272	0.629028
	0.615049	0.63861	0.629612	0.617203	0.539874	0.608333	0.547704	0.55251	0.816119	0.646196	0.603677
	0.623274	0.654606	0.63594	0.850833	0.563468	0.680316	0.551673	0.606079	0.838887	0.641033	0.611199
	0.625176	0.646332	0.607761	0.805502	0.576162	0.620977	0.552654	0.555874	0.820621	0.744293	0.622528
	0.636961	0.654937	0.65397	0.655172	0.5606	0.678448	0.558926	0.558988	0.819366	0.724457	0.609249
	0.657399	0.654495	0.655403	0.797365	0.580608	0.652011	0.542853	0.611686	0.822318	0.743478	0.627356
	0.618855	0.648318	0.638209	0.759008	0.542742	0.607759	0.545058	0.580541	0.816635	0.706793	0.597177
	0.615295	0.632763	0.593313	0.647811	0.563755	0.622557	0.551869	0.571571	0.815454	0.595109	0.605906
	0.608482	0.646001	0.630448	0.648198	0.54475	0.638218	0.54888	0.596362	0.817373	0.787772	0.630049
	0.606948	0.614451	0.569433	0.676095	0.556297	0.617098	0.552604	0.557867	0.815528	0.630707	0.601356
	0.638311	0.627799	0.634866	0.652848	0.583907	0.633046	0.561719	0.54977	0.819366	0.718478	0.624013
	0.61597	0.630667	0.575642	0.633863	0.557874	0.611494	0.532954	0.54516	0.81837	0.619565	0.609806
	0.633892	0.63508	0.612537	0.738861	0.576664	0.611207	0.556819	0.587268	0.818517	0.740489	0.607392
	0.628552	0.639493	0.603463	0.719101	0.576234	0.617385	0.544323	0.556871	0.824569	0.713315	0.594948
	0.643221	0.675124	0.62591	0.756683	0.571859	0.645259	0.549419	0.579046	0.826414	0.690761	0.606927
	0.608114	0.623828	0.59403	0.611391	0.556297	0.594109	0.535993	0.558864	0.827669	0.672554	0.576469
	0.618671	0.657915	0.621612	0.722201	0.568273	0.62931	0.529671	0.542419	0.818739	0.723641	0.612406
	0.621003	0.624269	0.622925	0.680744	0.574512	0.643678	0.546038	0.582783	0.812539	0.755435	0.608134
	0.626343	0.636514	0.63797	0.741186	0.550416	0.706609	0.546136	0.609941	0.821064	0.74837	0.605349
	0.61818	0.622504	0.607761	0.660984	0.552926	0.628448	0.548439	0.551264	0.812576	0.687228	0.610177
	0.634321	0.619857	0.638448	0.785742	0.567628	0.658764	0.547606	0.582036	0.822207	0.753804	0.633114
	0.624194	0.621401	0.610269	0.683456	0.582401	0.63319	0.546332	0.574935	0.815454	0.711413	0.60767
	0.644142	0.646773	0.605015	0.731112	0.572791	0.637356	0.547018	0.564968	0.820325	0.657337	0.614077
	0.628552	0.644236	0.608358	0.731887	0.564974	0.642529	0.552801	0.578174	0.820953	0.724185	0.638407
	0.638618	0.652179	0.652657	0.696242	0.570711	0.650287	0.544568	0.534446	0.825639	0.720924	0.606927
	0.63291	0.64203	0.612418	0.759396	0.571213	0.644253	0.54398	0.581537	0.817336	0.720924	0.629121
	0.634444	0.646222	0.619821	0.678032	0.572289	0.605029	0.561278	0.575557	0.806635	0.688859	0.61222
	0.616461	0.639713	0.619463	0.692755	0.55099	0.62931	0.542902	0.565342	0.832872	0.706522	0.602841
	0.622476	0.624821	0.639761	0.695079	0.587493	0.611207	0.547018	0.568332	0.817373	0.683967	0.615192
	0.631498	0.648097	0.655881	0.74506	0.584122	0.654741	0.543931	0.557369	0.818407	0.732609	0.606649
	0.634812	0.633977	0.580537	0.655172	0.535356	0.62342	0.533297	0.559487	0.802244	0.70462	0.589005
	0.631928	0.59636	0.543164	0.614491	0.54138	0.624282	0.525212	0.570823	0.798074	0.566848	0.586313
	0.622353	0.64203	0.618627	0.795428	0.55938	0.657471	0.519087	0.561729	0.817078	0.663587	0.628378
	0.629473	0.602648	0.618269	0.745835	0.560098	0.650862	0.5479	0.564594	0.810104	0.694565	0.611477
	0.634199	0.649972	0.653134	0.789616	0.584983	0.663075	0.542363	0.587019	0.829735	0.773913	0.598477
	0.615909	0.604744	0.621612	0.735374	0.555723	0.618103	0.544372	0.564594	0.812392	0.669837	0.59077
	0.62978	0.659901	0.619463	0.74351	0.584122	0.67227	0.561964	0.603339	0.825861	0.80625	0.627635
	0.616952	0.624821	0.586985	0.739248	0.567843	0.605316	0.523595	0.552137	0.806487	0.658696	0.588913
	0.62579	0.65957	0.611463	0.757458	0.580608	0.65158	0.548733	0.561605	0.810473	0.705435	0.61417
	0.629964	0.612907	0.656119	0.743123	0.567556	0.635057	0.53957	0.558864	0.81848	0.798641	0.592998
	0.63917	0.671594	0.662209	0.866718	0.566695	0.653736	0.566619	0.617541	0.837485	0.853804	0.620392
	0.629657	0.626145	0.622567	0.676869	0.557803	0.626006	0.552703	0.558988	0.804421	0.759783	0.61677
	0.642485	0.623718	0.568836	0.77838	0.574297	0.612213	0.540648	0.563349	0.817336	0.610598	0.602191
	0.593506	0.590844	0.547701	0.600155	0.539443	0.600144	0.520508	0.537062	0.785306	0.658152	0.58232
	0.626834	0.584335	0.577194	0.627276	0.56189	0.584195	0.536728	0.539554	0.797225	0.628533	0.575355
	0.627079	0.631329	0.616597	0.745448	0.567986	0.635345	0.544911	0.558615	0.809845	0.729076	0.599313
	0.614865	0.61401	0.608597	0.741573	0.565118	0.64454	0.546381	0.557244	0.802686	0.72962	0.604884
	0.635549	0.634087	0.635582	0.731499	0.560456	0.644253	0.541824	0.600847	0.804163	0.758152	0.616863
	0.636347	0.673138	0.637373	0.891902	0.585915	0.63908	0.545205	0.578174	0.812281	0.742935	0.602284
	0.643958	0.632653	0.617672	0.762108	0.563612	0.644684	0.55383	0.577052	0.810879	0.727989	0.594577
	0.643589	0.661997	0.629612	0.829523	0.585055	0.656322	0.560886	0.599352	0.811321	0.716576	0.618906
	0.648745	0.617209	0.612537	0.804339	0.563612	0.626293	0.546773	0.589137	0.805233	0.76087	0.636921
	0.632848	0.604302	0.625194	0.815188	0.555866	0.604741	0.549076	0.5555	0.801469	0.734783	0.603213
	0.628491	0.619857	0.603463	0.691205	0.589071	0.632184	0.530406	0.548648	0.820916	0.68587	0.594391
	0.613699	0.653172	0.610507	0.758621	0.558592	0.651724	0.534277	0.575931	0.811801	0.696467	0.565419
	0.620819	0.640375	0.599881	0.800465	0.562392	0.65977	0.550742	0.588763	0.809808	0.724185	0.627356
	0.619407	0.640596	0.65194	0.737311	0.566839	0.617672	0.542118	0.541298	0.808517	0.663859	0.589748
	0.612594	0.61059	0.578507	0.692367	0.546902	0.593391	0.538541	0.52747	0.813388	0.623641	0.583713
	0.624563	0.6139	0.607642	0.716389	0.559452	0.603305	0.540256	0.577302	0.809218	0.702989	0.608692
	0.610446	0.64203	0.652418	0.729175	0.562034	0.640948	0.531337	0.511773	0.811285	0.688587	0.585755
	0.619223	0.613127	0.592597	0.638512	0.546758	0.609195	0.531827	0.551763	0.80586	0.640761	0.571177
	0.650095	0.659459	0.626507	0.811313	0.564616	0.649425	0.545303	0.586147	0.806118	0.728261	0.59922
	0.625545	0.585218	0.613373	0.663309	0.564831	0.615517	0.529083	0.572692	0.806635	0.677174	0.612777
	0.623765	0.629785	0.597254	0.717551	0.578672	0.619971	0.530014	0.561854	0.804052	0.679076	0.597827
	0.61775	0.618753	0.600478	0.729175	0.578672	0.597414	0.541089	0.549645	0.812724	0.625815	0.600334
	0.642607	0.641919	0.644418	0.747772	0.585987	0.682471	0.545989	0.580042	0.814015	0.748913	0.631071
	0.638127	0.641258	0.632358	0.799303	0.578313	0.616092	0.563238	0.589635	0.812096	0.744022	0.626892
	0.619775	0.616437	0.590328	0.702828	0.554289	0.619971	0.550497	0.563473	0.818591	0.626087	0.601634
	0.625483	0.626365	0.610388	0.706703	0.563253	0.630172	0.537267	0.539056	0.796671	0.715217	0.600706
	0.600074	0.625372	0.603224	0.701666	0.553213	0.635489	0.539325	0.547403	0.800657	0.654891	0.603677
	0.622169	0.627689	0.599045	0.776443	0.572504	0.661638	0.551379	0.578298	0.808923	0.684783	0.581762
	0.623212	0.65273	0.630806	0.811701	0.575516	0.669109	0.556819	0.572069	0.817521	0.692935	0.644907
	0.608912	0.625041	0.584716	0.744673	0.545754	0.621408	0.536875	0.523732	0.810805	0.70788	0.578048
	0.608728	0.662548	0.595343	0.740411	0.556225	0.656609	0.539913	0.568083	0.811506	0.701359	0.598663
	0.621187	0.6385	0.626746	0.79814	0.572863	0.676724	0.543539	0.583531	0.827189	0.770109	0.62002
	0.622353	0.646994	0.611463	0.698179	0.574297	0.617816	0.55285	0.57618	0.812355	0.692663	0.612685
	0.614436	0.609818	0.610507	0.668346	0.556368	0.617385	0.5381	0.51115	0.797077	0.708424	0.583713
	0.586387	0.576282	0.56203	0.659047	0.548193	0.625144	0.535209	0.554877	0.785527	0.620924	0.566998
	0.641871	0.653061	0.649672	0.774893	0.562321	0.628161	0.555594	0.590632	0.812761	0.740761	0.630699
	0.625913	0.65251	0.611463	0.769857	0.57358	0.655029	0.533346	0.568581	0.808628	0.784783	0.631442
	0.619653	0.66674	0.629373	0.817513	0.569707	0.644109	0.544274	0.583032	0.809587	0.750543	0.619928
	0.622353	0.556867	0.585194	0.609066	0.540232	0.608908	0.521733	0.516382	0.80372	0.607065	0.560683
	0.64273	0.650855	0.629254	0.720263	0.551133	0.618678	0.548145	0.573813	0.802281	0.708424	0.630235
	0.620205	0.63519	0.588418	0.640449	0.559596	0.622989	0.538198	0.554005	0.807963	0.715761	0.580927
	0.620635	0.620518	0.595821	0.727238	0.554575	0.605316	0.552801	0.56746	0.803388	0.739674	0.58687
	0.6191	0.625372	0.596776	0.767145	0.576664	0.642241	0.541677	0.578049	0.807816	0.697011	0.577027
	0.635058	0.62096	0.618627	0.622627	0.553571	0.6	0.541873	0.553881	0.798886	0.716304	0.611385
	0.615663	0.642581	0.619463	0.666408	0.574943	0.641954	0.551281	0.609692	0.808185	0.682337	0.573777
	0.625913	0.650303	0.617075	0.741186	0.558663	0.612069	0.542412	0.578921	0.814569	0.677989	0.591234
	0.631314	0.616327	0.62997	0.611778	0.563898	0.636351	0.533052	0.5408	0.806856	0.69375	0.590584
	0.629473	0.623938	0.603343	0.845796	0.566624	0.639224	0.545842	0.546904	0.795897	0.694565	0.589841
	0.630087	0.611031	0.596657	0.660597	0.560671	0.622845	0.537708	0.56011	0.801506	0.695109	0.594113
	0.614804	0.644457	0.631522	0.810926	0.582258	0.669397	0.550546	0.596362	0.789107	0.737228	0.593741
	0.637943	0.639382	0.610985	0.714064	0.564114	0.633621	0.550595	0.579295	0.788848	0.68288	0.598106
	0.610078	0.639603	0.598806	0.666408	0.561532	0.599282	0.529573	0.555625	0.817152	0.63913	0.578234
	0.623949	0.577937	0.609791	0.719489	0.555293	0.630891	0.553879	0.543416	0.810768	0.71712	0.59142
	0.602038	0.629123	0.606448	0.664084	0.554217	0.572414	0.528152	0.574063	0.802982	0.584511	0.59142
	0.622353	0.635852	0.618149	0.821775	0.571213	0.677155	0.548096	0.565093	0.815233	0.669837	0.616863
	0.620757	0.604192	0.586507	0.682294	0.555006	0.586063	0.533297	0.571197	0.808923	0.637772	0.589191
	0.619407	0.610039	0.606687	0.769857	0.58068	0.617816	0.543686	0.554379	0.813462	0.751087	0.613706
	0.614006	0.625372	0.583284	0.707865	0.533133	0.634483	0.528789	0.562352	0.796302	0.658967	0.592906
	0.626711	0.623056	0.594985	0.78303	0.5606	0.668247	0.538345	0.572069	0.801063	0.701902	0.628285
	0.635672	0.615554	0.591522	0.678807	0.558233	0.597126	0.545499	0.533823	0.806967	0.645924	0.593927
	0.606027	0.591837	0.611104	0.671445	0.542886	0.62069	0.529279	0.559985	0.824901	0.646196	0.612127
	0.609894	0.626696	0.634746	0.762883	0.563325	0.648994	0.538541	0.58951	0.791542	0.74538	0.617049
	0.604431	0.619084	0.592955	0.71174	0.561819	0.599713	0.511883	0.528093	0.800509	0.677174	0.605256
	0.614988	0.607501	0.586985	0.732274	0.565333	0.622845	0.546332	0.564221	0.789955	0.633424	0.597456
	0.620942	0.60706	0.575642	0.664859	0.552424	0.638506	0.538051	0.554628	0.803978	0.667391	0.614542
	0.629964	0.611583	0.612179	0.663309	0.546472	0.659195	0.536434	0.55251	0.792096	0.717935	0.587427
	0.617934	0.599338	0.607522	0.731112	0.542456	0.601293	0.550791	0.533823	0.792354	0.690761	0.587427
	0.608421	0.597242	0.606448	0.630376	0.535714	0.621264	0.541383	0.552759	0.796413	0.619293	0.562633
	0.605843	0.606729	0.598448	0.749322	0.54224	0.598851	0.531386	0.53183	0.803683	0.696467	0.568298
	0.601669	0.621732	0.568597	0.626501	0.544679	0.594971	0.524232	0.523732	0.794568	0.633152	0.555855
	0.616216	0.608825	0.607164	0.719489	0.559954	0.553017	0.527515	0.516008	0.796819	0.668478	0.570805
	0.619653	0.608163	0.621373	0.71174	0.572648	0.643822	0.533591	0.532951	0.790952	0.678261	0.592534
	0.586325	0.5861	0.580537	0.639287	0.528041	0.584626	0.528495	0.532702	0.777704	0.545924	0.570434
	0.610569	0.651737	0.594388	0.700891	0.552639	0.614368	0.541775	0.544662	0.798111	0.691848	0.580462
	0.603511	0.582019	0.582209	0.594731	0.55852	0.593391	0.529279	0.535069	0.812133	0.682337	0.569598
	0.58743	0.597683	0.598806	0.630376	0.557731	0.599138	0.526535	0.536564	0.779401	0.648913	0.563191
	0.630393	0.633536	0.613612	0.74506	0.572433	0.648994	0.561866	0.587642	0.811838	0.847283	0.612035
	0.618241	0.609377	0.607284	0.628051	0.577309	0.642241	0.535061	0.535567	0.808665	0.682065	0.608784
	0.628245	0.625703	0.648478	0.727625	0.565404	0.669109	0.55481	0.558615	0.805048	0.6875	0.600334
	0.621187	0.622504	0.586866	0.845409	0.56103	0.634339	0.533248	0.566962	0.796635	0.699728	0.596527
	0.612594	0.630667	0.594746	0.767145	0.576018	0.633621	0.538982	0.585026	0.804827	0.739674	0.590956
	0.604186	0.618974	0.590448	0.68733	0.538153	0.613793	0.543539	0.584029	0.8011	0.631522	0.59272
	0.616829	0.612796	0.589134	0.659434	0.562894	0.62773	0.550889	0.594867	0.805011	0.704076	0.598384
	0.599521	0.610149	0.598209	0.707478	0.56354	0.626437	0.524085	0.529837	0.800251	0.63125	0.568576
	0.609464	0.577937	0.607284	0.74506	0.547906	0.617385	0.550105	0.534197	0.803498	0.72962	0.588263
	0.597557	0.567457	0.561433	0.678032	0.557516	0.567385	0.517862	0.512769	0.803904	0.602174	0.581112
	0.6307	0.647215	0.619582	0.775668	0.577883	0.623851	0.54692	0.549271	0.810842	0.745652	0.62067
	0.599951	0.599007	0.565493	0.70709	0.548623	0.599425	0.527515	0.556995	0.785269	0.708152	0.591977
	0.604124	0.62802	0.564657	0.688105	0.537937	0.588793	0.529328	0.558116	0.778627	0.639402	0.573498
	0.61327	0.600552	0.579463	0.609454	0.534137	0.603448	0.528152	0.522736	0.783793	0.636685	0.574705
	0.621433	0.608715	0.571582	0.612166	0.523164	0.601293	0.514823	0.542668	0.787077	0.635326	0.572569
	0.616768	0.608715	0.579582	0.715614	0.560026	0.661494	0.53761	0.607325	0.800694	0.650815	0.620763
	0.632173	0.62096	0.611343	0.620302	0.576736	0.670402	0.544323	0.581537	0.800878	0.685326	0.623363
	0.591788	0.608274	0.60406	0.604804	0.559237	0.643678	0.541187	0.546032	0.800546	0.691848	0.591234
	0.619407	0.634528	0.631045	0.734986	0.55185	0.635345	0.53364	0.565716	0.799624	0.698913	0.596527
	0.618671	0.63144	0.622209	0.829136	0.560384	0.618966	0.521292	0.544911	0.808554	0.694837	0.620392
	0.602406	0.586211	0.557851	0.660597	0.544248	0.57931	0.534963	0.536564	0.795638	0.686957	0.586684
	0.607746	0.63166	0.586269	0.604417	0.553428	0.616954	0.537414	0.543416	0.786007	0.612228	0.583527
	0.633278	0.630447	0.583403	0.83456	0.549699	0.625575	0.537904	0.555376	0.796598	0.740761	0.589934
	0.608728	0.581798	0.584239	0.634638	0.539228	0.602011	0.5258	0.555999	0.791062	0.608152	0.602934
	0.609832	0.606067	0.560836	0.671833	0.561819	0.569253	0.520998	0.531581	0.793313	0.666576	0.590863
	0.622844	0.59294	0.597134	0.760558	0.552209	0.598132	0.537512	0.555126	0.797077	0.644293	0.576562
	0.614006	0.607612	0.576119	0.770244	0.563181	0.600718	0.541383	0.569204	0.795528	0.664946	0.585013
	0.651814	0.641589	0.607522	0.705928	0.572289	0.612787	0.533934	0.545534	0.795786	0.689402	0.579812
	0.624624	0.62118	0.61409	0.729175	0.563038	0.618103	0.545842	0.593746	0.79538	0.636957	0.613613
	0.612594	0.608163	0.564179	0.678032	0.541595	0.591667	0.527956	0.561605	0.784014	0.605435	0.587241
	0.606518	0.608384	0.553433	0.614878	0.557587	0.6125	0.543686	0.530709	0.782944	0.671739	0.572662
	0.609035	0.612024	0.599164	0.759008	0.550273	0.604885	0.540207	0.55413	0.796376	0.62663	0.589563
	0.60394	0.60011	0.576597	0.655172	0.531053	0.600287	0.539472	0.56148	0.783313	0.584783	0.563562
	0.625299	0.621953	0.593313	0.699729	0.570783	0.644684	0.545597	0.570823	0.790841	0.707065	0.61157
	0.606027	0.613679	0.620896	0.710965	0.537292	0.640805	0.530406	0.542419	0.788442	0.651902	0.590027
	0.621862	0.589851	0.586269	0.647423	0.533204	0.562787	0.53315	0.522362	0.789697	0.650815	0.560683
	0.626404	0.623497	0.579821	0.762883	0.57064	0.59842	0.538688	0.550517	0.803904	0.634783	0.609434
	0.615602	0.650634	0.564537	0.655172	0.563898	0.605891	0.540452	0.522487	0.792538	0.626087	0.59987
	0.629043	0.640596	0.642627	0.83766	0.572146	0.661063	0.536581	0.588638	0.785822	0.785326	0.640821
	0.618793	0.608494	0.591881	0.80279	0.556225	0.588362	0.54545	0.538059	0.79597	0.676359	0.605442
	0.60394	0.604964	0.586746	0.649748	0.558233	0.625287	0.527711	0.578797	0.79704	0.649728	0.589934
	0.62309	0.618753	0.583642	0.671833	0.552926	0.624425	0.537953	0.591628	0.781136	0.67038	0.591977
	0.610078	0.624379	0.56394	0.67222	0.559739	0.642672	0.537512	0.556248	0.796671	0.724728	0.584641
	0.630946	0.60342	0.61791	0.724138	0.535141	0.607759	0.528446	0.545908	0.787114	0.673641	0.600706
	0.61775	0.600993	0.589493	0.704766	0.569205	0.621408	0.551036	0.572194	0.802317	0.71087	0.580834
	0.634874	0.651186	0.599284	0.776056	0.573437	0.639943	0.543049	0.561106	0.79693	0.73125	0.61612
	0.649174	0.63497	0.618985	0.848508	0.576807	0.640517	0.554418	0.593871	0.814052	0.738859	0.623549
	0.622415	0.627137	0.576836	0.727238	0.568417	0.64023	0.551673	0.57319	0.789402	0.735054	0.616956
	0.610876	0.645229	0.557015	0.697792	0.549842	0.617241	0.546969	0.573315	0.791468	0.65625	0.595784
	0.63248	0.63144	0.623284	0.800852	0.549053	0.637356	0.544029	0.56746	0.80324	0.705163	0.610085
	0.609648	0.619746	0.577433	0.712515	0.549699	0.620977	0.538639	0.594494	0.788258	0.67038	0.590398
	0.635426	0.608715	0.590448	0.772956	0.577955	0.656466	0.535944	0.560234	0.809107	0.670109	0.589748
	0.623949	0.587204	0.58006	0.70554	0.555579	0.578879	0.539668	0.570574	0.797188	0.632609	0.60767
	0.640398	0.614892	0.576239	0.736536	0.535714	0.620259	0.544617	0.565716	0.793867	0.697826	0.584548
	0.623765	0.612024	0.572299	0.634638	0.542814	0.603736	0.536189	0.547776	0.77501	0.604076	0.573312
	0.625238	0.627579	0.558687	0.60093	0.555364	0.59569	0.525653	0.544413	0.79752	0.701087	0.589934
	0.599092	0.616657	0.597015	0.683456	0.557803	0.602011	0.540844	0.555749	0.79907	0.670109	0.604327
	0.644755	0.628682	0.576716	0.784192	0.579246	0.644397	0.541383	0.559985	0.80217	0.75	0.613335
	0.643712	0.59294	0.571701	0.810539	0.557014	0.630603	0.546185	0.570201	0.801653	0.71712	0.602377
	0.638802	0.603971	0.585552	0.7253	0.548336	0.608621	0.517469	0.556248	0.786745	0.652717	0.576655
	0.633585	0.622945	0.587582	0.591244	0.559667	0.628017	0.537806	0.537436	0.793498	0.748098	0.607949
	0.631805	0.587976	0.556776	0.720651	0.549484	0.581897	0.544617	0.542046	0.78394	0.641848	0.598013
	0.627018	0.622945	0.574687	0.654398	0.543244	0.610201	0.549909	0.564968	0.799587	0.66413	0.579441
	0.630762	0.599559	0.563224	0.691592	0.568273	0.60819	0.534816	0.569079	0.804716	0.696467	0.600613
	0.611919	0.623607	0.574687	0.645486	0.538941	0.610776	0.537708	0.568083	0.778848	0.649728	0.587705
	0.635304	0.584004	0.584358	0.623402	0.55601	0.620546	0.542804	0.527221	0.806081	0.734239	0.585941
	0.62088	0.618643	0.57206	0.734599	0.572576	0.626724	0.540746	0.565217	0.790878	0.719022	0.567555
	0.610139	0.599779	0.603463	0.661372	0.547906	0.626868	0.53119	0.570823	0.781689	0.733424	0.583898
	0.628491	0.605074	0.575164	0.821387	0.564257	0.607615	0.521243	0.510527	0.781173	0.730978	0.568484
	0.623826	0.6	0.54591	0.575746	0.534925	0.58592	0.538443	0.532578	0.771652	0.58125	0.593556
	0.635181	0.598235	0.58794	0.755521	0.55938	0.615517	0.526584	0.553009	0.785675	0.719837	0.573034
	0.617382	0.612135	0.569194	0.697792	0.555364	0.672126	0.544715	0.553507	0.786228	0.68587	0.593463
	0.611735	0.622835	0.578269	0.770244	0.568488	0.604167	0.537022	0.534571	0.786782	0.67337	0.595691
	0.62935	0.616547	0.578985	0.805502	0.557803	0.611925	0.51992	0.530958	0.795638	0.635054	0.585291
	0.623151	0.58599	0.622806	0.710577	0.547404	0.593822	0.533836	0.589137	0.779623	0.713043	0.590863
	0.630639	0.592278	0.581015	0.649361	0.549842	0.603161	0.534669	0.530958	0.773645	0.627989	0.580184
	0.629227	0.633977	0.57003	0.642387	0.543101	0.601868	0.527613	0.547278	0.779623	0.610326	0.583434
	0.616461	0.628351	0.584	0.662534	0.55601	0.599138	0.535993	0.562975	0.782464	0.627989	0.591141
	0.627754	0.631219	0.557134	0.741573	0.555795	0.676149	0.543294	0.551264	0.788369	0.683696	0.612313
	0.608482	0.581467	0.555582	0.626114	0.547691	0.597845	0.525359	0.504796	0.77442	0.609239	0.604977
	0.632971	0.60353	0.57409	0.660984	0.558878	0.63319	0.530994	0.572817	0.793313	0.683696	0.584734
	0.597925	0.567126	0.559642	0.610616	0.541954	0.612356	0.531239	0.550019	0.785638	0.657337	0.592256
	0.614006	0.584887	0.539821	0.504456	0.52718	0.591523	0.534277	0.53345	0.770545	0.6	0.567834
	0.609894	0.615444	0.597493	0.692755	0.551205	0.587644	0.533885	0.565716	0.78228	0.671196	0.572384
	0.605168	0.594595	0.532776	0.711352	0.542742	0.596408	0.541236	0.552012	0.77453	0.644022	0.584455
	0.611919	0.606619	0.580418	0.792716	0.537937	0.643678	0.529916	0.572568	0.767002	0.647554	0.600056
	0.612287	0.60706	0.578149	0.702828	0.509538	0.579167	0.530602	0.523359	0.755342	0.610326	0.59272
	0.627018	0.601434	0.585313	0.693142	0.550344	0.601149	0.546626	0.546281	0.796856	0.664946	0.582227
	0.619959	0.608163	0.581612	0.755909	0.547547	0.616236	0.531582	0.551763	0.789734	0.703533	0.595506
	0.640766	0.630116	0.586149	0.768307	0.542886	0.674282	0.544764	0.58216	0.786118	0.697826	0.574241
	0.622108	0.600221	0.574925	0.565285	0.547045	0.615086	0.537365	0.563722	0.778184	0.658696	0.590398
	0.611121	0.614672	0.538507	0.717164	0.54475	0.623132	0.541481	0.561729	0.769733	0.64212	0.58622
	0.604309	0.599007	0.555104	0.67222	0.539228	0.615517	0.53168	0.575184	0.779955	0.615761	0.574705
	0.600442	0.591616	0.563582	0.593181	0.555795	0.583046	0.529279	0.554753	0.771837	0.611685	0.55539
	0.627877	0.610921	0.564776	0.737699	0.556942	0.616092	0.530945	0.552137	0.776745	0.666304	0.580834
	0.636838	0.597683	0.578149	0.69198	0.574943	0.631466	0.541481	0.572817	0.775121	0.666848	0.595041
	0.620082	0.595698	0.590687	0.739636	0.560169	0.626149	0.546087	0.557743	0.782833	0.711141	0.601634
	0.629289	0.581357	0.57397	0.729562	0.538439	0.576293	0.528005	0.557244	0.77859	0.71413	0.566534
	0.618302	0.589079	0.585313	0.676095	0.571931	0.61523	0.533052	0.536938	0.777077	0.62962	0.578977
	0.636592	0.62449	0.609672	0.690818	0.553141	0.587069	0.549517	0.552759	0.785158	0.666848	0.590491
	0.615725	0.600221	0.559522	0.65556	0.546041	0.587931	0.540256	0.53619	0.78645	0.659511	0.567276
	0.641625	0.594484	0.574328	0.736536	0.541595	0.615086	0.535405	0.530709	0.773682	0.670924	0.597827
	0.613024	0.596029	0.540299	0.638512	0.530694	0.587644	0.527417	0.532453	0.774863	0.64212	0.574241
	0.628675	0.599559	0.545075	0.612553	0.525818	0.62227	0.52776	0.523982	0.775121	0.639946	0.58492
	0.605782	0.62096	0.552358	0.628826	0.555508	0.637069	0.530455	0.544537	0.781689	0.664402	0.590491
	0.616891	0.570656	0.550209	0.677257	0.529977	0.620115	0.540746	0.535567	0.765637	0.633967	0.570434
	0.618118	0.655929	0.607642	0.812863	0.56691	0.64296	0.54153	0.576803	0.782575	0.73288	0.622435
	0.618609	0.608163	0.540179	0.712902	0.550559	0.59023	0.539864	0.509779	0.764309	0.64212	0.582598
	0.623581	0.621842	0.561791	0.723363	0.566767	0.611782	0.526682	0.538931	0.786634	0.719293	0.58817
	0.631621	0.593933	0.57194	0.742735	0.552424	0.602299	0.538296	0.545908	0.772501	0.734239	0.613056
	0.62088	0.603751	0.565731	0.684231	0.530049	0.618391	0.519577	0.543416	0.766449	0.649728	0.602563
	0.627202	0.611362	0.582448	0.741186	0.527037	0.591667	0.535895	0.535318	0.763091	0.641033	0.598106
	0.627509	0.594815	0.585672	0.704766	0.557372	0.598851	0.537708	0.585399	0.781985	0.660054	0.59987
	0.609035	0.598125	0.591045	0.732274	0.552281	0.610489	0.544911	0.523483	0.772612	0.630163	0.588634
	0.622353	0.600883	0.582925	0.665246	0.544894	0.593678	0.544127	0.57319	0.768921	0.665761	0.626613
	0.624808	0.607612	0.556896	0.750484	0.534925	0.58908	0.529132	0.553009	0.772169	0.686957	0.549726
	0.615663	0.603971	0.604179	0.779155	0.557085	0.611782	0.54153	0.572069	0.781948	0.641304	0.629492
	0.614313	0.568009	0.582567	0.700891	0.560958	0.609626	0.541334	0.540426	0.756633	0.675	0.567834
	0.61106	0.570656	0.569075	0.677257	0.547332	0.59454	0.52629	0.565716	0.7718	0.69375	0.578048
	0.603265	0.610259	0.576239	0.678419	0.53636	0.586782	0.533934	0.536689	0.766597	0.616576	0.572941
	0.613761	0.610149	0.544716	0.604417	0.531627	0.561638	0.532268	0.515136	0.751319	0.635598	0.565234
	0.620819	0.587093	0.549851	0.655947	0.531555	0.611925	0.539717	0.519372	0.75774	0.597554	0.598849
	0.616031	0.579923	0.594627	0.703603	0.529188	0.589368	0.533787	0.54678	0.77597	0.642663	0.59272
	0.646535	0.598787	0.613851	0.668733	0.556297	0.598132	0.526045	0.565342	0.782021	0.745652	0.584455
	0.62757	0.574186	0.564657	0.728787	0.54095	0.618247	0.53168	0.536813	0.769696	0.661141	0.604606
	0.625054	0.62791	0.584836	0.655172	0.545396	0.607471	0.547557	0.557867	0.772685	0.644293	0.616492
	0.616829	0.571098	0.599881	0.701666	0.536145	0.599425	0.540795	0.539429	0.773128	0.693478	0.603492
	0.624685	0.599448	0.540776	0.734599	0.555651	0.594828	0.520851	0.538184	0.782686	0.691304	0.567091
	0.60302	0.584997	0.539582	0.677257	0.557516	0.603017	0.539129	0.555999	0.758072	0.621467	0.565141
	0.628368	0.595587	0.549612	0.682681	0.553213	0.595259	0.52972	0.545285	0.780951	0.666304	0.587891
	0.620635	0.559846	0.561313	0.65556	0.535284	0.611494	0.531876	0.54678	0.768368	0.632337	0.592348
	0.627631	0.600331	0.552955	0.618365	0.56311	0.608764	0.551428	0.530833	0.77025	0.625815	0.557155
	0.622108	0.610039	0.559164	0.683456	0.54848	0.615948	0.528397	0.535817	0.766892	0.664946	0.589655
	0.625667	0.598345	0.586149	0.702441	0.547045	0.605316	0.548586	0.55251	0.786708	0.641033	0.584363
	0.624317	0.61048	0.553672	0.734212	0.529188	0.614368	0.538688	0.552884	0.769881	0.646739	0.568484
	0.617136	0.56492	0.53994	0.686168	0.534567	0.612644	0.525408	0.545534	0.782427	0.599185	0.580091
	0.633217	0.595587	0.576478	0.687718	0.56311	0.627443	0.54006	0.575433	0.788258	0.623098	0.59727
	0.615049	0.6107	0.600597	0.705928	0.587708	0.642385	0.546577	0.565217	0.785675	0.730435	0.588448
	0.639109	0.603751	0.553552	0.644711	0.55185	0.669684	0.53712	0.606079	0.768958	0.689946	0.604699
	0.630209	0.594374	0.565134	0.635025	0.552998	0.608333	0.529426	0.527968	0.778848	0.615217	0.586313
	0.618671	0.579923	0.578985	0.640062	0.543675	0.619109	0.529524	0.533076	0.771726	0.682337	0.597363
	0.651077	0.61401	0.597134	0.735761	0.572791	0.615948	0.53119	0.599726	0.790804	0.694837	0.605534
	0.639293	0.616437	0.611701	0.768694	0.575516	0.635345	0.53266	0.545036	0.774494	0.675	0.601727
	0.64052	0.62791	0.594627	0.712127	0.576449	0.62227	0.552261	0.607201	0.796081	0.767935	0.611756
	0.625115	0.560066	0.551881	0.598218	0.554934	0.606609	0.534375	0.528217	0.773313	0.677446	0.583713
	0.630393	0.625814	0.554269	0.752034	0.563898	0.605891	0.518205	0.566089	0.773645	0.73288	0.60572
	0.64942	0.625152	0.58591	0.715614	0.555938	0.65	0.55133	0.58378	0.766412	0.772554	0.611942
	0.629718	0.618864	0.592836	0.810539	0.543818	0.626724	0.533836	0.553258	0.773866	0.660054	0.61092
	0.647517	0.643905	0.605731	0.7284	0.566408	0.670833	0.542118	0.598729	0.779365	0.686141	0.633485
	0.623458	0.58941	0.554866	0.643162	0.567628	0.646264	0.542853	0.556372	0.772685	0.639402	0.580277
	0.623642	0.608605	0.538746	0.696242	0.551133	0.614799	0.525996	0.575059	0.778258	0.672554	0.565791
	0.632971	0.598125	0.57194	0.681131	0.566982	0.590517	0.539717	0.548275	0.767371	0.741576	0.566069
	0.628184	0.630778	0.580537	0.746222	0.543173	0.609626	0.540158	0.559736	0.761836	0.73288	0.61612
	0.615111	0.594264	0.540896	0.670283	0.549484	0.620833	0.544911	0.551638	0.776708	0.663043	0.561055
	0.647026	0.609928	0.594269	0.805502	0.540878	0.652874	0.545646	0.559487	0.781579	0.67663	0.613149
	0.594488	0.572532	0.513433	0.624564	0.525961	0.552586	0.523007	0.520742	0.770102	0.601087	0.583248
	0.615847	0.580916	0.552	0.647811	0.538368	0.566236	0.541726	0.521365	0.756781	0.665489	0.580462
	0.607807	0.58941	0.552955	0.738861	0.552281	0.611351	0.529524	0.533699	0.779623	0.641848	0.562355
	0.641011	0.590403	0.538388	0.609841	0.537005	0.644828	0.54251	0.581164	0.770508	0.668207	0.598756
	0.610139	0.580364	0.553433	0.660597	0.552998	0.607184	0.532856	0.556248	0.766523	0.68288	0.611756
	0.617566	0.630778	0.566806	0.6389	0.55601	0.599569	0.534326	0.525726	0.770434	0.633696	0.587613
	0.607009	0.626034	0.53397	0.647423	0.546328	0.61408	0.536091	0.577551	0.761061	0.683424	0.612685
	0.613392	0.605957	0.58603	0.713289	0.557803	0.607615	0.54251	0.5408	0.777187	0.64212	0.594391
	0.648683	0.61401	0.575642	0.731887	0.550488	0.656178	0.531484	0.574187	0.781283	0.69375	0.604792
	0.624685	0.604523	0.584597	0.704378	0.549555	0.589224	0.530553	0.527345	0.774125	0.696196	0.593556
	0.578899	0.572863	0.519522	0.604417	0.524096	0.558908	0.53266	0.486359	0.751061	0.582609	0.562912
	0.605782	0.573745	0.520597	0.646649	0.53636	0.582184	0.522076	0.534695	0.774198	0.628261	0.599591
	0.64494	0.61048	0.558209	0.798915	0.570496	0.618822	0.538443	0.566089	0.774752	0.612772	0.576005
	0.623642	0.584225	0.529552	0.640062	0.523881	0.575144	0.520704	0.561355	0.758626	0.709239	0.580555
	0.635672	0.605847	0.588179	0.812476	0.537937	0.635345	0.539472	0.528093	0.770102	0.710598	0.615285
	0.62935	0.612355	0.570985	0.776831	0.559524	0.614655	0.557211	0.587019	0.782132	0.638859	0.60507
	0.616522	0.572421	0.558328	0.707865	0.538439	0.571408	0.531239	0.538433	0.764382	0.671739	0.581948
	0.6423	0.584887	0.547343	0.718326	0.542169	0.624856	0.538639	0.562352	0.759364	0.628804	0.625406
	0.626281	0.630226	0.556896	0.769082	0.555149	0.612213	0.535846	0.520493	0.756818	0.66413	0.605627
	0.64451	0.63508	0.55594	0.705153	0.556799	0.676006	0.530945	0.563473	0.765379	0.68587	0.601913
	0.631866	0.570546	0.557373	0.552112	0.544607	0.595546	0.52188	0.550517	0.76501	0.621739	0.579255
	0.632357	0.592278	0.584358	0.714064	0.550416	0.615374	0.542657	0.559487	0.761615	0.655978	0.577398
	0.63604	0.609377	0.573612	0.61914	0.540806	0.617385	0.539717	0.523982	0.753423	0.633967	0.589284
	0.63782	0.584335	0.563343	0.721426	0.537866	0.617529	0.533836	0.515884	0.75774	0.619022	0.584177
	0.614988	0.615003	0.544478	0.719876	0.545683	0.624713	0.538541	0.568581	0.746227	0.691848	0.603399
	0.611305	0.601544	0.570866	0.717939	0.552567	0.59842	0.513059	0.523857	0.744603	0.61875	0.553719
	0.623335	0.567126	0.543881	0.585045	0.530192	0.597414	0.521537	0.538308	0.744972	0.690217	0.58232
	0.605966	0.5893	0.544478	0.626501	0.531842	0.626006	0.533787	0.537187	0.743201	0.63913	0.576284
	0.638863	0.618423	0.588537	0.624564	0.543029	0.597701	0.536336	0.549147	0.752906	0.695652	0.579812
	0.637881	0.608605	0.547701	0.741186	0.539659	0.609914	0.536777	0.556995	0.759327	0.605435	0.615006
	0.628798	0.619857	0.545791	0.611391	0.543029	0.604454	0.517469	0.544288	0.75405	0.694022	0.592534
	0.639477	0.581026	0.588896	0.611003	0.551205	0.589655	0.523301	0.556746	0.760434	0.693478	0.583341
	0.645124	0.610149	0.559761	0.6358	0.532487	0.623707	0.538884	0.534571	0.756301	0.646739	0.605627
	0.610937	0.554881	0.555463	0.586594	0.524025	0.564943	0.519822	0.532453	0.74785	0.602446	0.54434
	0.636163	0.565141	0.553552	0.625726	0.551779	0.605747	0.532513	0.530584	0.758183	0.604348	0.573498
	0.62309	0.59647	0.558448	0.604417	0.540806	0.558046	0.534718	0.550642	0.751319	0.67337	0.565884
	0.63604	0.597463	0.587343	0.669508	0.556225	0.641523	0.550889	0.541672	0.755268	0.66413	0.604699
	0.622783	0.590844	0.550687	0.661372	0.526535	0.577299	0.528201	0.539056	0.764456	0.650543	0.571455
	0.622844	0.58952	0.569552	0.693917	0.551492	0.590661	0.520263	0.541423	0.738773	0.658424	0.571269
	0.645492	0.607281	0.592119	0.777993	0.548121	0.614943	0.549468	0.563722	0.751245	0.714674	0.60442
	0.64273	0.594374	0.523104	0.678419	0.538726	0.579023	0.540207	0.549645	0.747149	0.650543	0.59077
	0.643896	0.593602	0.566925	0.665633	0.545826	0.624856	0.545499	0.538059	0.735857	0.638587	0.58752
	0.661572	0.618533	0.600358	0.802015	0.58111	0.649713	0.530063	0.569453	0.767371	0.749185	0.630235
	0.608666	0.584225	0.561672	0.680744	0.543818	0.592385	0.528838	0.526473	0.747518	0.675815	0.585941
	0.618916	0.585108	0.570507	0.650523	0.559954	0.592098	0.530896	0.518998	0.739031	0.729348	0.61092
	0.608482	0.580474	0.561433	0.62069	0.532846	0.598994	0.535503	0.568456	0.746153	0.666848	0.600334
	0.625852	0.589189	0.576597	0.656722	0.539228	0.613649	0.539031	0.57618	0.750729	0.598913	0.60572
	0.613024	0.620298	0.552358	0.689655	0.555293	0.614799	0.542118	0.554254	0.739179	0.689674	0.583805
	0.646904	0.57176	0.550806	0.714839	0.553571	0.615086	0.524722	0.530958	0.745194	0.698913	0.58362
	0.630884	0.579923	0.547582	0.624177	0.54095	0.601293	0.523644	0.538308	0.762205	0.674185	0.60702
	0.656417	0.627799	0.562746	0.74506	0.563612	0.614511	0.546675	0.566588	0.754234	0.68913	0.612035
	0.635058	0.581026	0.543045	0.691205	0.523594	0.602299	0.535993	0.536813	0.75084	0.632609	0.592813
	0.626772	0.633205	0.569672	0.736536	0.53177	0.591379	0.518009	0.570325	0.741356	0.724185	0.598756
	0.624072	0.607722	0.558448	0.572259	0.534854	0.569828	0.534718	0.526598	0.739289	0.659239	0.58882
	0.647947	0.65251	0.583045	0.827586	0.570927	0.647126	0.545744	0.598356	0.747408	0.79837	0.60507
	0.654146	0.575951	0.551284	0.679969	0.535141	0.56092	0.547165	0.529961	0.729953	0.683696	0.585663
	0.636654	0.610149	0.593075	0.76482	0.562536	0.62658	0.540697	0.556871	0.755268	0.619565	0.601077
	0.631744	0.625924	0.57994	0.759783	0.558161	0.650431	0.543735	0.574561	0.740802	0.680163	0.61092
	0.638188	0.59658	0.555582	0.71174	0.55938	0.599713	0.544176	0.554504	0.738256	0.666576	0.610549
	0.62131	0.580474	0.537791	0.645874	0.540806	0.576868	0.528005	0.527844	0.739068	0.53913	0.557991
	0.626343	0.588748	0.560478	0.700891	0.539013	0.58477	0.534277	0.526224	0.738219	0.66712	0.621785
	0.640398	0.634639	0.568119	0.861682	0.549484	0.608908	0.532219	0.581911	0.742315	0.730978	0.609342
	0.633646	0.568009	0.545194	0.679194	0.552281	0.615086	0.52482	0.55413	0.736928	0.710598	0.587427
	0.620266	0.568229	0.520955	0.603255	0.535571	0.564799	0.526731	0.506167	0.736153	0.647283	0.58102
	0.660836	0.5893	0.551522	0.695467	0.550273	0.623563	0.534914	0.563847	0.737001	0.654348	0.583713
	0.642239	0.565803	0.544358	0.631151	0.519865	0.572701	0.523693	0.521365	0.720027	0.694837	0.569598
	0.653409	0.608163	0.569194	0.709415	0.54848	0.64181	0.529083	0.551638	0.742869	0.7375	0.591884
	0.648929	0.595036	0.541254	0.711352	0.548982	0.63046	0.538492	0.561231	0.745858	0.682609	0.619928
	0.65298	0.587424	0.559881	0.769082	0.54389	0.608477	0.540893	0.535817	0.743385	0.683696	0.603027
	0.63248	0.602758	0.592836	0.730337	0.560815	0.601006	0.540795	0.561231	0.737001	0.719293	0.627449
	0.642485	0.587645	0.567761	0.683069	0.540806	0.605029	0.536189	0.582285	0.735009	0.721196	0.58557
	0.645922	0.582791	0.568358	0.707478	0.521945	0.625862	0.532464	0.537561	0.729879	0.662772	0.602841
	0.648499	0.573966	0.564179	0.746997	0.559237	0.620402	0.542951	0.542918	0.73619	0.672826	0.586591
	0.65298	0.614672	0.534806	0.611003	0.528543	0.578305	0.524918	0.544786	0.726189	0.616304	0.588727
	0.647824	0.59283	0.525851	0.674157	0.540519	0.602874	0.54104	0.578547	0.732905	0.719293	0.592627
	0.656171	0.627579	0.598209	0.730337	0.568273	0.645115	0.543686	0.58515	0.740064	0.769837	0.59857
	0.628061	0.569884	0.562388	0.657885	0.521515	0.584052	0.516293	0.546406	0.734824	0.609783	0.599499
	0.658442	0.616216	0.54997	0.750097	0.554073	0.621121	0.543049	0.574935	0.741208	0.67663	0.630328
	0.648499	0.582019	0.542448	0.680356	0.557372	0.572701	0.538884	0.549396	0.723348	0.647826	0.603027
	0.64316	0.560728	0.558806	0.714452	0.52675	0.55819	0.517273	0.541298	0.730285	0.612228	0.590677
	0.628245	0.585328	0.542328	0.595118	0.537077	0.580316	0.512079	0.539056	0.723643	0.622554	0.569969
	0.619346	0.591506	0.570388	0.717551	0.561675	0.596408	0.531778	0.547776	0.729178	0.649457	0.597734
	0.63782	0.63166	0.53409	0.561023	0.538009	0.570977	0.530945	0.5185	0.732352	0.706793	0.570805
	0.634137	0.580916	0.552119	0.757458	0.544105	0.617385	0.528936	0.503551	0.727075	0.673913	0.573405
	0.606641	0.598345	0.549134	0.640062	0.533778	0.589655	0.51595	0.510901	0.720765	0.602446	0.561705
	0.658074	0.595587	0.536358	0.6358	0.568345	0.598132	0.535111	0.562103	0.725193	0.671739	0.594484
	0.663475	0.640706	0.56406	0.746222	0.567197	0.609195	0.545597	0.574561	0.740876	0.738315	0.608506
	0.637574	0.571429	0.541851	0.66912	0.52761	0.59727	0.540599	0.504049	0.720285	0.642391	0.577305
	0.630271	0.540541	0.532299	0.593956	0.535212	0.574138	0.537659	0.507662	0.716373	0.666304	0.589748
	0.641993	0.588969	0.570866	0.77993	0.560384	0.610057	0.536434	0.560857	0.720802	0.65	0.579441
	0.628429	0.612576	0.568239	0.794653	0.540376	0.605029	0.536434	0.529961	0.735821	0.707337	0.59402
	0.642055	0.574186	0.551284	0.709028	0.547978	0.602586	0.54741	0.530833	0.734713	0.698641	0.58622
	0.661266	0.631109	0.577552	0.792329	0.587421	0.637356	0.544666	0.562726	0.734049	0.729076	0.621785
	0.641257	0.573635	0.557612	0.585432	0.522662	0.570546	0.52286	0.537436	0.718255	0.691033	0.584641
	0.65654	0.614341	0.544239	0.683843	0.536431	0.622701	0.536042	0.568332	0.731503	0.739674	0.598477
	0.650095	0.621401	0.555701	0.80124	0.528112	0.619253	0.537365	0.53619	0.72796	0.673098	0.604049
	0.628736	0.585549	0.536478	0.676482	0.536933	0.594828	0.535748	0.537934	0.732647	0.601359	0.573312
	0.637022	0.588086	0.530269	0.592406	0.545826	0.600575	0.518205	0.532578	0.719731	0.650272	0.554462
	0.654146	0.597352	0.552358	0.697792	0.553787	0.634052	0.548047	0.538557	0.733939	0.646467	0.60117
	0.624133	0.585218	0.551164	0.643936	0.545826	0.636207	0.537855	0.513517	0.734529	0.636957	0.573869
	0.63647	0.629013	0.593552	0.819837	0.551348	0.643391	0.549027	0.553507	0.738367	0.667391	0.612127
	0.647824	0.591616	0.525612	0.618752	0.54934	0.58908	0.515313	0.523608	0.713495	0.672011	0.549447
	0.625361	0.623828	0.579701	0.722201	0.557516	0.613362	0.553683	0.563224	0.72796	0.66712	0.598013
	0.615602	0.565913	0.525134	0.595893	0.551707	0.600287	0.515656	0.531456	0.719879	0.641576	0.577398
	0.629473	0.588638	0.516657	0.750872	0.541093	0.566092	0.534228	0.562975	0.720506	0.619022	0.600427
	0.638188	0.566133	0.524776	0.646649	0.5322	0.589224	0.54055	0.525352	0.702019	0.64538	0.566255
	0.639723	0.590403	0.568597	0.707478	0.56605	0.582902	0.531729	0.555999	0.713827	0.683967	0.574798
	0.637329	0.580695	0.555463	0.633863	0.539085	0.589943	0.523938	0.553507	0.719916	0.685326	0.568669
	0.625238	0.546167	0.522985	0.549787	0.535858	0.556753	0.528691	0.536564	0.703716	0.646467	0.559012
	0.645553	0.550248	0.557493	0.685006	0.545826	0.596983	0.538198	0.555376	0.720912	0.655978	0.600891
	0.628798	0.589079	0.572657	0.772181	0.541882	0.615805	0.53565	0.542668	0.714934	0.68288	0.571548
	0.637145	0.616768	0.543881	0.602867	0.572504	0.618534	0.534032	0.577551	0.721835	0.710054	0.596899
	0.638004	0.60353	0.568478	0.762495	0.553141	0.623563	0.536679	0.545534	0.725377	0.676087	0.616027
	0.629166	0.595367	0.55809	0.648198	0.550344	0.556609	0.543294	0.571197	0.727702	0.67337	0.574519
	0.631866	0.595918	0.528	0.663309	0.532989	0.593822	0.541236	0.532578	0.71213	0.686957	0.591234
	0.64273	0.595036	0.543284	0.602092	0.539587	0.639943	0.537757	0.544911	0.725008	0.608424	0.576748
	0.625545	0.579261	0.536836	0.588919	0.542384	0.617098	0.543343	0.561355	0.701797	0.644022	0.564769
	0.639109	0.600331	0.558448	0.786904	0.557659	0.631322	0.538002	0.562975	0.719584	0.668478	0.605999
	0.632971	0.598235	0.553313	0.672995	0.53428	0.625862	0.544421	0.555874	0.708255	0.678533	0.582134
	0.640152	0.611914	0.555104	0.81945	0.561173	0.64296	0.544862	0.608945	0.724418	0.779348	0.618349
	0.636899	0.579702	0.563224	0.7253	0.542886	0.600144	0.541334	0.552261	0.71379	0.672554	0.610827
	0.618364	0.577055	0.528	0.668346	0.538798	0.581466	0.515313	0.542046	0.712831	0.614946	0.568576
	0.628307	0.582681	0.541373	0.706703	0.555293	0.57342	0.521684	0.568706	0.706779	0.671467	0.604142
	0.621494	0.565913	0.519403	0.588919	0.536288	0.57342	0.528691	0.53918	0.696852	0.551087	0.591048
	0.597373	0.588748	0.530388	0.697792	0.543388	0.608477	0.534914	0.563224	0.695266	0.692935	0.597549
	0.604002	0.550138	0.506985	0.507943	0.508176	0.555029	0.524134	0.529712	0.70021	0.61712	0.573591
	0.733137	0.623938	0.626985	0.74351	0.584983	0.691523	0.660411	0.700511	0.818591	0.701902	0.690501
	1.03474	0.833756	0.872119	0.99845	0.844449	0.981609	0.904053	0.876791	0.950589	0.909239	0.924784
	1.18738	0.831109	0.828776	0.886866	0.905981	0.986925	1.01916	1.01221	1.04144	0.871739	1.02006
	1.07697	0.746167	0.735522	0.811313	0.866179	0.922989	0.975107	0.910552	1.02055	0.856522	1.00186
	0.987172	0.69818	0.690985	0.780705	0.799125	0.821264	0.91694	0.802043	0.961917	0.75462	0.944006
	0.920764	0.661445	0.656119	0.841147	0.733362	0.79181	0.851767	0.751215	0.938227	0.740761	0.856347
	0.869453	0.645119	0.657313	0.795041	0.743904	0.737787	0.799726	0.721565	0.876121	0.746467	0.825889
	0.832628	0.666189	0.637731	0.697404	0.694636	0.707615	0.767188	0.684066	0.846452	0.689402	0.767945
	0.815749	0.62802	0.606448	0.735761	0.678787	0.745259	0.733278	0.677962	0.821912	0.691576	0.735537
	0.800528	0.64225	0.591284	0.72995	0.650889	0.712931	0.726172	0.678959	0.793313	0.655707	0.698579
	0.773215	0.668505	0.61003	0.724138	0.639271	0.724282	0.697849	0.665878	0.792059	0.74837	0.711208
	0.734364	0.644126	0.577791	0.815188	0.625789	0.697845	0.673249	0.640463	0.774088	0.740761	0.722908
	0.729086	0.619967	0.590448	0.695467	0.634825	0.678017	0.660166	0.610814	0.762131	0.72038	0.662643
	0.710428	0.598235	0.574806	0.549399	0.58319	0.620402	0.641202	0.578672	0.758331	0.62337	0.659486
	0.721966	0.617761	0.596896	0.666796	0.600545	0.646983	0.634537	0.616793	0.734197	0.640217	0.655864
	0.710673	0.63861	0.579104	0.705928	0.612665	0.669109	0.638359	0.607325	0.743939	0.667391	0.642121
	0.90278	0.724324	0.703522	0.889965	0.713497	0.681178	0.660264	0.597359	0.746264	0.65	0.700436
	1.23133	0.861224	0.881194	0.899264	0.925559	0.970402	0.918361	0.823595	0.87542	0.908967	0.908162
	1.18529	0.77187	0.778866	0.764432	0.900818	0.995546	1.06728	0.902953	0.964722	0.841848	0.961742
	1.08409	0.730171	0.71606	0.865943	0.876865	0.965517	1.00897	0.847265	0.971143	0.852446	0.961371
	0.99865	0.683067	0.671284	0.695079	0.788081	0.881609	0.945215	0.782609	0.900033	0.747826	0.861083
	0.931259	0.720353	0.647403	0.876017	0.770726	0.841236	0.884402	0.748225	0.875309	0.825272	0.855233
	0.897809	0.682625	0.67403	0.817125	0.755952	0.802874	0.848091	0.722686	0.85981	0.833152	0.834711
	0.844596	0.666078	0.66197	0.836497	0.694134	0.73908	0.778654	0.666999	0.823462	0.730435	0.754945
	0.850611	0.660342	0.66997	0.891515	0.707042	0.760345	0.763513	0.666376	0.821433	0.74538	0.789395
	0.799975	0.637617	0.602627	0.762108	0.66681	0.730029	0.735189	0.682447	0.781616	0.727446	0.756245
2	0.77966	0.649421	0.624239	0.694305	0.646299	0.697126	0.700495	0.665504	0.784162	0.728804	0.705637
	0.733873	0.6107	0.573254	0.689655	0.620123	0.639511	0.676092	0.61617	0.757002	0.693478	0.670722
	0.750506	0.64909	0.621373	0.83301	0.634825	0.69842	0.692605	0.639841	0.765563	0.686957	0.702572
	0.736144	0.612576	0.577313	0.630763	0.601262	0.645546	0.648307	0.585648	0.744492	0.620652	0.6658
	0.750506	0.619636	0.596179	0.665633	0.617757	0.674856	0.648454	0.600723	0.761541	0.677446	0.655121
	0.761063	0.656812	0.616119	0.83611	0.626147	0.739799	0.706081	0.713467	0.807078	0.76712	0.695793
	1.01258	0.76139	0.747224	0.861294	0.763196	0.93319	0.953888	0.89199	0.935939	0.873641	0.885226
	1.21439	0.861666	0.842746	0.962805	0.878155	0.995115	1.0665	0.926747	1.02185	0.966304	1.01839
	1.14681	0.826696	0.777433	1.03332	0.871773	0.981897	1.03499	1.0147	1.15646	0.902174	1.07726
	1.03904	0.724986	0.722149	0.811313	0.817843	0.894397	0.956927	0.882646	1.14377	0.899185	1.05934
	0.990487	0.695753	0.694567	0.731112	0.766136	0.861207	0.903317	0.801545	1.10332	0.85	1.02572
	0.927454	0.706674	0.636299	0.870593	0.744191	0.809052	0.875092	0.793323	1.0479	0.765217	0.944563
	0.873381	0.686486	0.652537	0.821775	0.709194	0.796983	0.812809	0.745359	0.992029	0.770924	0.868233
	0.830111	0.649311	0.605851	0.622627	0.677281	0.708621	0.760376	0.651551	0.916971	0.74538	0.803696
	0.801203	0.635742	0.620657	0.745448	0.653901	0.740805	0.75087	0.678585	0.884092	0.748098	0.789395
	0.777021	0.602096	0.606806	0.7253	0.633964	0.650575	0.70858	0.6518	0.852319	0.642935	0.755223
	0.759958	0.642802	0.573851	0.71174	0.628729	0.686782	0.700103	0.585275	0.820547	0.695109	0.719008
	0.752102	0.606619	0.559284	0.686943	0.611159	0.676724	0.673298	0.61779	0.794789	0.67337	0.718173
	0.755478	0.643464	0.616119	0.729175	0.623064	0.703736	0.679179	0.639467	0.780472	0.70625	0.6892
	0.737679	0.623276	0.606209	0.781867	0.608649	0.605029	0.664527	0.619409	0.778479	0.683967	0.671743
	0.760081	0.618092	0.57803	0.630376	0.619263	0.644971	0.665017	0.628753	0.75822	0.673098	0.652893
	0.739581	0.63861	0.593791	0.786129	0.599111	0.671121	0.646494	0.580665	0.766523	0.693207	0.6554
	0.726324	0.646111	0.588537	0.850058	0.61288	0.65704	0.646788	0.63548	0.756375	0.692935	0.680565
	0.702756	0.63144	0.608478	0.710577	0.60033	0.689511	0.636742	0.610315	0.755526	0.666304	0.656607
	0.719327	0.6246	0.604179	0.768694	0.611804	0.683477	0.660166	0.656285	0.762796	0.712228	0.6697
	0.961026	0.787424	0.794388	0.975203	0.764917	0.924425	0.855687	0.841286	0.889627	0.852989	0.836661
	1.18112	0.840706	0.899224	1.00387	0.906698	1.0477	1.01646	0.981811	0.98059	0.908696	0.958863
	1.14724	0.788086	0.801194	0.802402	0.928069	0.959195	0.991376	0.898717	0.980184	0.911685	0.958492
	1.06929	0.739106	0.720358	0.777993	0.82609	0.881753	0.935708	0.803164	0.939703	0.80625	0.858947
	0.96342	0.707115	0.645373	0.726075	0.793388	0.787644	0.879698	0.722063	0.903354	0.713315	0.800074
	0.902228	0.697628	0.675463	0.842697	0.784567	0.840517	0.826285	0.739629	0.85457	0.733424	0.782152
	0.880624	0.676999	0.668776	0.867881	0.728987	0.79296	0.799775	0.717329	0.839108	0.741848	0.764602
	0.841343	0.660673	0.631881	0.686556	0.670754	0.715517	0.748469	0.655538	0.802133	0.641576	0.703222
	0.826183	0.634528	0.624	0.787679	0.67434	0.750431	0.740187	0.676342	0.793719	0.720924	0.702572
	0.792365	0.650524	0.62603	0.83921	0.66975	0.760632	0.720439	0.662389	0.773977	0.709511	0.686136
	0.767446	0.644567	0.622687	0.693917	0.661862	0.666379	0.693733	0.657282	0.75929	0.645924	0.676293
	0.773338	0.641809	0.607761	0.754746	0.616896	0.698132	0.676631	0.617541	0.7525	0.744293	0.651221
	0.772418	0.622725	0.607164	0.666408	0.624641	0.661638	0.669917	0.591379	0.739695	0.648913	0.648807
	0.746394	0.617209	0.591403	0.729175	0.617398	0.671408	0.653305	0.62215	0.723385	0.666576	0.672207
	0.752102	0.645891	0.587224	0.685393	0.609366	0.667816	0.641251	0.580665	0.716447	0.654891	0.619742
	0.740257	0.597794	0.593791	0.805114	0.631526	0.638075	0.654824	0.608322	0.724861	0.716848	0.609249
	0.739275	0.626475	0.606806	0.790391	0.632387	0.707615	0.68403	0.704746	0.770914	0.774457	0.6892
	1.00215	0.792499	0.810388	0.936846	0.771299	0.970546	0.925859	0.942444	0.929149	0.954891	0.900269
	1.17867	0.843464	0.867701	0.910112	0.88669	1.01509	1.04253	0.957518	1.00435	0.905978	0.98375
	1.20027	0.84578	0.862209	1.02945	0.904547	1.00704	1.03254	0.995141	1.07587	0.878261	1.07057
	1.33444	1.01842	0.978507	1.03565	0.989243	1.1148	1.16759	0.97496	1.08369	0.788859	1.1054
	1.45124	1.01368	1.06997	1.19024	1.08556	1.23779	1.29421	1.1333	1.11897	0.980435	1.15619
	1.53962	1.03828	0.977791	1.03332	1.05293	1.14009	1.24761	1.13704	1.17953	1.04321	1.23233
	1.45437	0.950689	0.995701	0.884153	1.10757	1.14511	1.28373	1.1769	1.21783	0.935598	1.21766
	1.34628	0.859018	0.883582	0.880279	1.06031	1.11307	1.22267	1.13156	1.22776	0.873641	1.20568
	1.40048	0.979923	0.956776	1.20186	1.10951	1.09425	1.14867	1.02928	1.17244	1.04076	1.18414
	1.50046	1.02482	1.05218	1.06122	1.1927	1.20761	1.19185	0.969976	1.1079	0.908424	1.16102
	1.61272	1.02295	1.06066	1.09996	1.25136	1.26868	1.29735	1.09867	1.16694	1.06413	1.26084
	1.48125	0.925317	0.935403	0.96513	1.15799	1.23664	1.27966	1.18301	1.20831	0.927717	1.20838
	1.3504	0.842692	0.860896	0.91205	1.06713	1.10603	1.20978	1.12234	1.19731	0.867935	1.15442
	1.30277	0.871925	0.864716	0.92406	1.03263	1.03276	1.14172	1.02703	1.14465	0.905163	1.06918
	1.44252	0.979702	0.994985	0.881054	1.1382	1.02011	1.07218	0.918151	1.07266	0.795652	1.06008
	1.50273	1.05593	1.11045	1.07478	1.23286	1.22615	1.2262	1.02342	1.15237	0.929076	1.17718
	1.42202	0.961169	0.997373	0.914374	1.21579	1.14397	1.15598	0.95266	1.13447	0.892663	1.14765
	1.33474	0.904578	0.889313	0.891127	1.12737	1.06121	1.12319	0.874424	1.09978	0.882065	1.11264
	1.24016	0.822284	0.828896	0.831461	1.0355	0.969684	1.03224	0.854989	1.02779	0.853261	1.05172
	1.1562	0.766133	0.775761	0.83611	0.960341	0.948851	0.953104	0.784477	0.971955	0.738859	0.962856
	1.11612	0.745284	0.710925	0.791554	0.898523	0.873851	0.909198	0.739753	0.928964	0.744565	0.920327
	1.09035	0.702261	0.707701	0.726463	0.839214	0.831178	0.868329	0.677464	0.889627	0.722283	0.887269
	1.08924	0.709542	0.689313	0.86943	0.807731	0.821839	0.835449	0.725427	0.862873	0.76712	0.842325
	1.04345	0.681081	0.654687	0.717164	0.767355	0.78477	0.785858	0.646817	0.832724	0.68913	0.781781
	1.07531	0.696856	0.658746	0.768307	0.715361	0.749138	0.766943	0.690171	0.809403	0.837228	0.791996
	1.12643	0.683398	0.666866	0.78303	0.722031	0.774569	0.751752	0.688925	0.806672	0.802717	0.80546
	1.17412	0.644457	0.638567	0.763657	0.68646	0.707759	0.716127	0.649309	0.774789	0.757065	0.751138
	1.25618	0.666851	0.601791	0.745835	0.673551	0.709914	0.719018	0.644325	0.762205	0.755707	0.74148
	1.38741	0.662217	0.615881	0.665246	0.64006	0.683046	0.692115	0.649433	0.768073	0.716304	0.741016
	1.42644	0.620298	0.634627	0.702053	0.655192	0.699282	0.679816	0.627383	0.743348	0.74375	0.732473
	1.52968	0.656702	0.586866	0.740798	0.648666	0.651868	0.693488	0.582409	0.728182	0.729348	0.716037
	1.62739	0.658467	0.647761	0.756683	0.643287	0.711351	0.672661	0.654915	0.728256	0.733696	0.72263
	1.65967	0.688252	0.581254	0.859744	0.615677	0.699138	0.671583	0.62514	0.730064	0.771467	0.726158
	1.71657	0.654826	0.616239	0.735761	0.614386	0.693534	0.646102	0.624019	0.722351	0.661413	0.708608
	1.72252	0.664644	0.620537	0.718714	0.633893	0.642529	0.65012	0.623396	0.708956	0.782337	0.714737
	1.7618	0.669829	0.609433	0.818675	0.602266	0.697989	0.636154	0.635854	0.70593	0.778804	0.754109
	1.71945	0.65251	0.634149	0.711352	0.627653	0.711782	0.622826	0.609443	0.730359	0.777989	0.705358
	1.71785	0.644015	0.601672	0.792716	0.621414	0.700144	0.622041	0.593497	0.705081	0.738859	0.728944
	1.64574	0.658356	0.589731	0.724138	0.594808	0.662213	0.622286	0.592002	0.698697	0.734239	0.682979
	1.61419	0.613017	0.584239	0.716002	0.591294	0.664799	0.628363	0.590382	0.705524	0.652446	0.676479
	1.55011	0.615996	0.59606	0.808601	0.587995	0.645402	0.613515	0.592749	0.709694	0.744837	0.670629
	1.51482	0.609156	0.599164	0.698954	0.595023	0.649713	0.615475	0.618911	0.690985	0.758424	0.680472
	1.47321	0.623056	0.59809	0.715227	0.604776	0.658477	0.612192	0.577925	0.696188	0.747554	0.67165
	1.43405	0.608825	0.621493	0.679582	0.605063	0.625431	0.602146	0.541423	0.683383	0.705163	0.67295
	1.38931	0.609266	0.552955	0.756683	0.584839	0.653448	0.5872	0.591877	0.684306	0.740761	0.651593
	1.31817	0.601434	0.59009	0.736149	0.572576	0.703592	0.566913	0.551264	0.694896	0.638587	0.629399
	1.28307	0.634749	0.605134	0.779543	0.602697	0.624425	0.593473	0.615174	0.687295	0.621739	0.649085
	1.21316	0.655819	0.584	0.733049	0.583262	0.657184	0.599745	0.602965	0.678918	0.65462	0.66255
	1.20622	0.625814	0.59606	0.605579	0.580895	0.625144	0.595237	0.589137	0.673346	0.751087	0.669514
	1.18542	0.623387	0.569075	0.779155	0.583118	0.617816	0.604302	0.605083	0.681612	0.665761	0.640449
	1.11723	0.622284	0.590925	0.783417	0.580967	0.657184	0.600921	0.564594	0.68128	0.75625	0.650664
	1.12944	0.676669	0.646209	0.83456	0.637407	0.690086	0.634537	0.687555	0.72678	0.776902	0.703408
	1.33444	0.830116	0.844537	0.932972	0.770941	0.930891	0.863233	0.866949	0.839108	0.871467	0.843718
	1.46854	0.895422	0.88597	0.969392	0.900746	1.00503	0.992993	0.99402	0.936492	0.957065	0.984585
	1.58007	0.913844	0.893134	1.04843	0.91889	1.06796	1.03719	1.0446	1.03159	0.929076	1.05191
	1.80863	1.08991	1.0271	1.05424	0.994765	1.04411	1.11731	1.08608	1.13857	1.0125	1.24784
	1.90112	1.17143	1.13504	1.01976	1.08405	1.16293	1.21625	1.14551	1.20772	1.06005	1.30634
	1.88602	1.11649	1.08179	1.01705	1.11604	1.25474	1.25643	1.21029	1.25828	0.976902	1.40607
	1.84951	1.18996	1.09206	1.05657	1.16659	1.21609	1.23193	1.20979	1.25008	0.972283	1.35751
	1.89812	1.17242	1.12501	1.08485	1.21457	1.25144	1.26197	1.18824	1.26403	1.0019	1.41787
	1.80752	1.15598	1.05421	1.01705	1.19234	1.22385	1.27103	1.14638	1.20126	0.98288	1.27523
	1.67747	1.09487	0.995821	1.16118	1.13913	1.1602	1.1792	1.06628	1.14894	0.969837	1.2223
	1.71282	1.12344	1.07463	1.1945	1.21723	1.14095	1.15387	0.984552	1.0731	0.884239	1.17003
	1.77659	1.09068	1.09934	1.08601	1.27955	1.29986	1.28534	1.08633	1.15052	1.02609	1.28926
	1.75812	1.08494	1.03045	1.09996	1.20439	1.32787	1.30156	1.12433	1.20709	1.06413	1.34154
[truncated: 1,094 more rows]

## Sheet: Fig7-Suppl Fig 1 A - islet 3
	cell1	cell2	cell3	cell4	cell5	cell6	cell7	cell8	cell9	cell10
[truncated: 2,402 more rows]

[truncated: 9 more sheets: Fig7-Suppl Fig 1 A - islet 4, Fig7-Suppl Fig 1 A - islet 5, Fig7-Suppl Fig 1 A - islet 6, Fig7-Suppl Fig 1 B - islet 1, Fig7-Suppl Fig 1 B - islet 2, Fig7-Suppl Fig 1 B - islet 3, Fig7-Suppl Fig 1 B - islet 4, Fig7-Suppl Fig 1 B - islet 5, Fig7-Suppl Fig 1 B - islet 6]
