# Supplementary material for: Microtubules regulate pancreatic β-cell heterogeneity via spatiotemporal control of insulin secretion hot spots
Source: eLife. 2021 Nov 16;10:e59912. doi: 10.7554/eLife.59912 (PMC8635970; doi:10.7554/eLife.59912)
Supplement: Figure 8—figure supplement 1—source data 1. [file elife-59912-fig8-figsupp1-data1.xlsx]

## Sheet: Fig8-FigSuppl1 A
ctr glu 8 mins	noc glu 8 mins	Kcl ctr 8 min	KCl noc 8 min	Kcl+glu ctr 8 min	Kcl+glu noc 8 min		ctr glu 8 mins	noc glu 8 mins	Kcl ctr 8 min	KCl noc 8 min	Kcl+glu ctr 8 min	Kcl+glu noc 8 min		Statistical significance calculated using Kruskal-Wallis test of each condition compared to every other condition
5	1	0	16	5	1									Number of families	1
5	4	0	8	0	29									Number of comparisons per family	15
0	2	1	0	1	6									Alpha	0.05
3	4	1	20	5	47	stdev	6.07251	7.7877	8.35819	5.49202	9.43941	10.9428
1	3	0	6	10	11	mean	2.76418	4.9697	3.27336	2.92232	7.65246	10.3061		Dunn's multiple comparisons test	Mean rank diff.	Significant?	Summary	Adjusted P Value
1	3	0	0	13	13	var coef	2.19686	1.56704	2.5534	1.87934	1.23351	1.06178		ctr glu 8 mins vs. noc glu 8 mins	-319.1	Yes	****	<0.0001	A-B
5	0	0	0	6	23									ctr glu 8 mins vs. Kcl ctr 8 min	-37.18	No	ns	>0.9999	A-C
0	1	1	3	8	4									ctr glu 8 mins vs. KCl noc 8 min	-41.88	No	ns	>0.9999	A-D
9	4	0	3	0	8									ctr glu 8 mins vs. Kcl+glu ctr 8 min	-573.2	Yes	****	<0.0001	A-E
4	7	0	13	5	17									ctr glu 8 mins vs. Kcl+glu noc 8 min	-793.4	Yes	****	<0.0001	A-F
33	32	1	40	0	18									noc glu 8 mins vs. Kcl ctr 8 min	281.9	Yes	****	<0.0001	B-C
3	9	0	57	1	2									noc glu 8 mins vs. KCl noc 8 min	277.2	Yes	****	<0.0001	B-D
2	8	0	18	11	12									noc glu 8 mins vs. Kcl+glu ctr 8 min	-254.2	Yes	***	0.0001	B-E
1	4	0	28	1	9									noc glu 8 mins vs. Kcl+glu noc 8 min	-474.4	Yes	****	<0.0001	B-F
1	1	0	9	2	10		Kruskal-Wallis test non-parametric and multiple comparison tests,							Kcl ctr 8 min vs. KCl noc 8 min	-4.702	No	ns	>0.9999	C-D
4	1	0	27	6	13									Kcl ctr 8 min vs. Kcl+glu ctr 8 min	-536.1	Yes	****	<0.0001	C-E
5	0	0	22	0	3									Kcl ctr 8 min vs. Kcl+glu noc 8 min	-756.3	Yes	****	<0.0001	C-F
16	1	0	11	12	6									KCl noc 8 min vs. Kcl+glu ctr 8 min	-531.4	Yes	****	<0.0001	D-E
0	2	0	0	9	25									KCl noc 8 min vs. Kcl+glu noc 8 min	-751.6	Yes	****	<0.0001	D-F
36	11	0	5	10	29									Kcl+glu ctr 8 min vs. Kcl+glu noc 8 min	-220.2	Yes	**	0.0026	E-F
8	0	1	11	0	25
4	2	1	7	7	12									Test details	Mean rank 1	Mean rank 2	Mean rank diff.	n1	n2	Z
1	7	0	5	11	1									ctr glu 8 mins vs. noc glu 8 mins	1080	1399	-319.1	335	363	5.708
0	4	0	7	7	2									ctr glu 8 mins vs. Kcl ctr 8 min	1080	1117	-37.18	335	578	0.7338
1	1	0	3	8	5									ctr glu 8 mins vs. KCl noc 8 min	1080	1121	-41.88	335	708	0.856
2	29	1	16	10	9									ctr glu 8 mins vs. Kcl+glu ctr 8 min	1080	1653	-573.2	335	305	9.817
0	2	2	11	1	4									ctr glu 8 mins vs. Kcl+glu noc 8 min	1080	1873	-793.4	335	330	13.87
3	0	4	4	14	4									noc glu 8 mins vs. Kcl ctr 8 min	1399	1117	281.9	363	578	5.705
0	6	0	14	6	7									noc glu 8 mins vs. KCl noc 8 min	1399	1121	277.2	363	708	5.82
0	0	0	25	26	26									noc glu 8 mins vs. Kcl+glu ctr 8 min	1399	1653	-254.2	363	305	4.435
0	5	0	1	5	15									noc glu 8 mins vs. Kcl+glu noc 8 min	1399	1873	-474.4	363	330	8.453
0	16	1	0	0	14									Kcl ctr 8 min vs. KCl noc 8 min	1117	1121	-4.702	578	708	0.1137
0	3	0	30	11	9									Kcl ctr 8 min vs. Kcl+glu ctr 8 min	1117	1653	-536.1	578	305	10.27
1	3	0	0	44	6									Kcl ctr 8 min vs. Kcl+glu noc 8 min	1117	1873	-756.3	578	330	14.86
2	3	0	16	14	4									KCl noc 8 min vs. Kcl+glu ctr 8 min	1121	1653	-531.4	708	305	10.52
0	0	0	6	46	1									KCl noc 8 min vs. Kcl+glu noc 8 min	1121	1873	-751.6	708	330	15.28
0	0	0	15	22	53									Kcl+glu ctr 8 min vs. Kcl+glu noc 8 min	1653	1873	-220.2	305	330	3.758
0	1	1	4	40	15
2	0	1	0	5	3
1	2	0	11	28	25
1	2	1	0	6	37
7	0	0	6	4	28
1	0	0	24	19	4
3	0	0	2	9	15
0	0	0	4	31	2
1	1	0	0	10	11
4	1	2	0	5	5
0	5	1	0	2	10
0	1	0	1	11	4
15	1	2	24	11	37
0	0	9	0	3	17
0	12	11	0	5	7
5	3	0	0	2	14
0	0	4	1	2	24
0	1	1	0	3	11
1	0	0	0	24	30
0	0	4	5	12	8
0	0	1	2	0	8
2	0	0	8	21	4
0	0	0	0	11	2
1	0	1	3	13	3
1	1	2	2	14	8
0	0	0	32	1	7
0	0	0	35	2	17
0	0	1	20	0	16
0	2	0	5	1	7
0	20	0	6	1	2
0	4	1	6	0	1
3	0	0	5	4	34
2	2	0	1	0	7
0	1	5	8	14	6
2	0	0	0	26	6
0	0	0	2	4	14
4	0	0	2	11	4
0	12	0	5	10	13
0	1	0	13	3	9
0	3	26	2	1	9
1	7	0	5	14	10
0	1	0	14	3	18
0	0	2	2	10	58
5	0	1	4	6	4
4	0	0	2	3	24
2	0	2	2	15	14
4	0	0	9	22	14
0	0	0	4	7	2
0	1	1	0	17	13
0	0	2	5	23	7
0	2	0	0	0	56
0	0	0	0	28	7
0	0	1	6	0	11
1	1	0	0	10	13
0	0	0	0	2	4
0	2	2	0	16	19
0	1	1	8	4	2
0	0	1	1	9	26
0	0	3	4	3	3
1	2	0	0	9	10
0	0	1	0	5	33
0	0	14	0	24	2
0	0	4	1	5	5
0	1	15	4	6	29
0	4	25	3	7	2
0	1	5	1	4	7
1	0	24	2	1	13
0	0	0	2	4	7
0	1	7	1	0	2
0	1	19	0	3	27
0	0	1	0	4	16
0	0	55	2	3	1
0	0	18	3	2	5
0	0	13	5	5	5
0	1	11	3	3	48
0	2	8	0	1	4
0	3	0	1	7	4
0	2	14	0	13	7
0	0	41	0	0	0
2	1	0	1	6	21
1	14	1	1	0	7
2	4	20	3	3	11
4	0	5	2	1	8
2	0	11	1	1	7
0	0	17	0	15	4
1	0	62	0	12	19
0	0	9	0	7	10
0	9	10	0	2	5
0	0	10	4	1	3
0	2	12	1	2	10
9	1	15	12	19	0
23	3	6	15	10	3
0	3	5	10	5	1
5	1	0	9	0	7
3	2	5	3	14	5
1	0	7	2	12	4
0	3	2	15	3	9
1	2	1	15	14	10
3	2	14	9	1	17
3	3	25	0	8	14
1	18	2	2	7	4
0	1	5	0	22	21
0	0	24	1	9	26
6	0	4	0	4	4
0	1	7	5	4	0
2	0	13	0	10	6
0	1	10	1	41	3
0	3	5	4	1	10
0	21	3	0	7	5
7	10	6	0	8	9
0	4	1	0	5	35
1	6	12	0	3	8
3	1	9	0	12	7
2	5	10	0	4	8
0	3	6	1	11	5
0	0	9	8	2	0
0	0	4	4	16	2
0	5	2	5	14	15
1	1	12	4	10	11
0	10	3	0	2	0
0	20	1	0	10	0
0	2	3	7	47	3
0	2	1	8	42	11
0	12	1	5	4	11
0	7	2	0	7	8
2	1	1	3	47	0
9	13	2	0	20	6
1	1	1	3		51
8	1	12	2	26	3
1	10	1	3	4	13
6	4	2	0	14	22
1	0	2	0	0	10
10	0	13	0	2	5
6	7	4	5	15	37
1	28	2	0	13	9
19	2	5	0	4	19
1	0	6	13	10	6
4	7	5	0	8	21
41	9	2	2	2	53
61	0	2	9	2	22
20	0	6	1	18	1
5	0	0	0	9	5
3	1	2	5	0	6
19	0	0	4	3	26
19	0	0	0	10	18
1	1	5	0	6	14
3	0	0	2	6	8
2	0	1	0	0	18
0	0	20	1	1	2
0	0	5	13	3	2
5	0	1	9	20	14
1	0	0	2	13	24
2	3	0	0	11	9
0	18	2	6	25	15
0	21	4	3	9	8
1	8	6	9	18	5
2	23	12	1	5	7
7	2	5	3	5	18
0	58	0	10	8	18
0	9	0	2	7	6
0	12	0	0	14	1
0	2	1	0	4	8
0	14	21	8	7	1
19	13	16	6	2	3
19	8	19	0	2	15
1	9	24	3	2	7
1	2	8	4	7	8
0	4	5	16	1	6
0	7	26	10	0	4
19	10	25	12	14	8
9	8	0	4	0	0
7	22	0	2	5	0
0	10	0	0	14	6
0	2	0	18	12	0
3	4	2	5	4	13
5	10	1	3	2	0
4	0	0	6	15	10
2	2	28	5	0	0
13	18	40	3	0	3
3	0	5	0	20	3
3	6	3	0	4	0
4	11	0	0	32	6
2	3	1	0	0	5
2	9	2	0	1	6
14	14	0	0	5	10
8	8	3	1	12	3
0	5	17	0	2	3
1	2	5	0	0	14
3	1	0	0	0	21
7	0	4	0	0	27
2	3	0	0	3	4
4	1	3	0	1	3
9	4	1	1	0	24
18	2	0	0	7	14
4	5	11	0	9	5
15	0	1	0	0	2
11	1	1	0	11	8
11	1	3	0	0	5
4	2	0	0	3	10
1	1	0	0	0	1
2	3	2	0	6	5
7	0	0	0	2	5
1	0	3	0	2	6
3	1	3	0	3	11
0	11	0	0	1	1
0	2	2	1	2	9
2	6	6	3	0	0
5	2	4	0	1	9
4	23	6	0	4	5
1	3	0	0	0	6
0	4	0	0	0	3
0	1	8	0	3	4
1	4	0	0	3	24
0	1	4	0	64	0
1	2	1	0	20	20
5	1	0	0	3	24
0	4	2	2	18	18
0	3	0	0	8	34
0	2	1	0	1	14
0	1	3	1	1	0
0	3	0	0	15	24
0	3	0	6	17	8
0	12	1	0	20	0
0	8	1	0	26	4
0	14	0	0	7	2
5	10	0	0	21	32
4	9	0	0	3	26
0	15	0	0	9	22
0	4	0	0	0	40
2	1	1	0	3	12
0	7	0	4	3	17
0	5	0	1	3	38
0	18	0	1	6	49
0	14	0	4	4	9
0	25	0	0	1	0
0	1	0	0	0	9
0	1	0	4	8	0
0	16	0	17	15	0
0	21	0	0	0	5
0	47	136	1	3	14
0	2	1	0	9	3
2	13	2	1	9	6
1	36	2	5	9	17
1	18	5	7	0	1
0	21	0	6	0	13
0	5	7	3	0	7
0	8	2	21	0	29
2	1	8	3	0	26
0	9	2	1	0	1
0	2	1	2	0	7
5	0	10	0	0	0
0	0	14	0	0	3
1	3	1	1	0	0
4	0	1	1	0	21
1	0	2	0	0	0
3	0	0	3	0	14
1	7	0	1	0	11
0	1	0	4	0	0
0	7	3	1	0	1
0	1	3	2	0	5
1	7	1	0	0	4
0	2	5	0	0	4
0	1	4	0	0	0
0	7	0	0	0	0
1	6	0	2	0	0
2	0	0	2	0	15
2	17	0	0	0	7
0	1	1	0	0	4
0	7	0	0	0	6
3	33	0	0		2
0	52	0	4		12
1	1	4	1		2
2	8	3	6		1
0	24	0	1		0
1	0	5	15		2
1	2	1	0		2
2	9	6	6		0
4	5	2	13		1
2	1	3	2		0
0	1	1	0		0
1	0	0	2		2
1	1	0	18		2
0	1	0	1		2
2	5	30	0		1
0	4	0	2		0
0	5	2	2		0
0	0	5	3		0
11	1	7	0		0
0	4	0	0		1
0	1	0	0		0
2	0	0	0		1
0	4	0	0		1
1	3	0	0		1
5	2	1	0
1	1	0	0
11	19	0	0
2	4	0	0
0	0	0	0
	22	0	0
	35	0	0
	1	0	0
	16	7	0
	1	1	0
	4	2	0
	8	5	0
	6	0	0
	14	0	0
	8	0	0
	2	0	0
	2	0	0
	2	0	0
	10	3	0
	5	2	0
	14	0	0
	2	0	0
	1	0	0
	0	2	0
	1	0	0
	4	0	4
	9	0	3
	3	0	0
	10	0	1
	5	1	0
	4	0	1
	0	0	1
	0	2	7
		0	0
		0	0
		0	0
		0	2
		1	0
		0	7
		2	0
		0	0
		0	2
		1	1
		1	0
		11	1
		10	0
		0	1
		3	0
		3	1
		1	0
		0	1
		3	14
		0	0
		0	8
		1	0
		1	1
		0	0
		0	0
		0	1
		0	0
		1	2
		8	2
		3	3
		1	0
		0	1
		9	0
		5	0
		0	0
		2	3
		0	1
		0	0
		0	0
		0	0
		0	2
		0	4
		0	1
		1	1
		0	0
		0	1
		1	0
		0	0
		1	0
		0	0
		1	0
		1	0
		1	0
		6	0
		0	1
		0	0
		0	0
		0	0
		0	2
		0	2
		0	15
		1	2
		0	3
		1	1
		0	0
		1	0
		1	0
		1	1
		0	0
		0	0
		10	0
		4	0
		1	1
		2	0
		2	3
		0	10
		0	1
		0	5
		0	2
		0	1
		5	0
		0	0
		3	3
		0	5
		1	4
		1	2
		2	0
		0	9
		2	2
		2	3
		6	0
		3	0
		0	3
		0	3
		0	5
		0	8
		0	2
		0	0
		3	1
		0	0
		0	0
		1	1
		2	1
		0	0
		2	0
		0	0
		1	3
		1	0
		0	0
		0	1
		1	0
		0	1
		1	0
		1	0
		2	0
		0	0
		6	8
		5	2
		1	0
		0	2
		0	0
		1	0
		0	1
		2	0
		5	0
		0	1
		1	2
		4	2
		0	0
		1	0
		0	3
		1	26
		0	0
		2	0
		1	0
		0	0
		0	0
		0	0
		0	0
		0	0
		14	0
		2	1
		4	0
		2	3
		0	0
		0	0
		0	0
		1	3
		1	0
		0	0
		1	0
		3	1
		1	2
		0	2
		0	0
		0	0
		2	0
		3	0
		0	0
		0	0
		0	0
		0	0
		0	3
		1	1
		1	1
		0	0
		0	1
		0	1
		1	2
		6	2
		0	0
		0	0
		1	0
		0	1
		0	0
		0	0
		0	1
		0	0
		14	0
		4	4
		1	2
		5	1
		15	0
		0	0
		0	0
		0	1
		1	0
		0	1
		4	3
		10	0
		2	1
		8	0
		2	1
		14	0
		2	0
		3	0
		2	0
		2	0
		3	1
		3	0
		3	0
		2	1
		0	1
		0	2
		1	7
		0	1
		3	1
		0	25
		7	0
		1	4
		4	6
		6	4
		1	2
		9	0
		13	1
			1
			12
			7
			4
			7
			10
			1
			2
			6
			7
			3
			5
			20
			7
			2
			3
			2
			13
			4
			3
			0
			2
			3
			1
			0
			8
			0
			2
			1
			0
			8
			0
			7
			0
			0
			1
			0
			0
			10
			9
			3
			23
			6
			0
			0
			3
			4
			0
			0
			2
			1
			0
			4
			2
			3
			0
			5
			0
			0
			1
			0
			3
			0
			9
			0
			0
			2
			0
			3
			0
			2
			0
			1
			2
			4
			0
			3
			2
			0
			1
			0
			0
			4
			0
			4
			0
			9
			3
			3
			4
			0
			2
			0
			0
			0
			0
			0
			4
			6
			2
			3
			0
			7
			0
			0
			0
			7
			6
			6
			0
			2
			1
			1
			0
			0
			2
			0
			6
			10
			6
			4
			11
			1
			11
			2
			1
			0
			1
			0
			0

## Sheet: Fig8-FigSuppl1 B
num clsters p cell	0	1	2	3	4	5+
DMSO Glu	290	34	8	2	1	0
Noc Glu	279	49	27	6	2	0
DMSO KCl	494	50	20	11	2	1
Noc KCl	597	83	18	7	1	2
DMSO KCl+Glu	175	80	27	14	5	5
Noc KCl+Glu	143	98	61	14	11	3

## Sheet: Fig8-FigSuppl1 C
ctr glu 8min	noc glu 8min	KCl ctr 8min	KCl noc 8min	KCl+glu ctr 8min	KCl+glu noc 8min		ctr glu 8min	noc glu 8min	KCl ctr 8min	KCl noc 8min	KCl+glu ctr 8min	KCl+glu noc 8min			Statistical significance calculated using Kruskal-Wallis test of each condition compared to every other condition
3	18	9	6	5	22										Number of families	1
4	3	4	21	5	4										Number of comparisons per family	15
6	4	3	43	4	3										Alpha	0.05
3	4	3	25	6	14	stdev	8.34183	10.7162	13.5357	6.02299	6.84002	5.80875
4	11	15	24	3	10	mean	6.86111	7.34109	7.52941	6.30128	6.75641	6.64912			Dunn's multiple comparisons test	Mean rank diff.	Significant?	Summary	Adjusted P Value
4	4	3	6	3	6	var	1.21581	1.45975	1.7977	0.955835	1.01238	0.873612			ctr glu 8min vs. noc glu 8min	-16.44	No	ns	>0.9999	A-B
63	5	3	21	3	6										ctr glu 8min vs. KCl ctr 8min	4.834	No	ns	>0.9999	A-C
3	23	17	4	3	6										ctr glu 8min vs. KCl noc 8min	3.32	No	ns	>0.9999	A-D
7	12	23	9	3	3										ctr glu 8min vs. KCl+glu ctr 8min	-46.96	No	ns	>0.9999	A-E
3	5	14	3	4	10										ctr glu 8min vs. KCl+glu noc 8min	-34.02	No	ns	>0.9999	A-F
4	3	15	7	4	11										noc glu 8min vs. KCl ctr 8min	21.27	No	ns	>0.9999	B-C
3	6	4	10	3	10										noc glu 8min vs. KCl noc 8min	19.76	No	ns	>0.9999	B-D
4	5	16	14	17	4										noc glu 8min vs. KCl+glu ctr 8min	-30.53	No	ns	>0.9999	B-E
3	7	6	3	16	3										noc glu 8min vs. KCl+glu noc 8min	-17.59	No	ns	>0.9999	B-F
3	3	7	3	12	9										KCl ctr 8min vs. KCl noc 8min	-1.514	No	ns	>0.9999	C-D
3	3	4	15	26	9										KCl ctr 8min vs. KCl+glu ctr 8min	-51.8	No	ns	>0.9999	C-E
5	6	4	3	10	4										KCl ctr 8min vs. KCl+glu noc 8min	-38.86	No	ns	>0.9999	C-F
8	4	3	16	24	8										KCl noc 8min vs. KCl+glu ctr 8min	-50.28	No	ns	>0.9999	D-E
10	4	85	22	13	4										KCl noc 8min vs. KCl+glu noc 8min	-37.34	No	ns	>0.9999	D-F
6	4	4	13	11	12										KCl+glu ctr 8min vs. KCl+glu noc 8min	12.94	No	ns	>0.9999	E-F
3	5	7	10	7	4
4	9	3	7	11	4										Test details	Mean rank 1	Mean rank 2	Mean rank diff.	n1	n2	Z
9	12	7	12	6	4										ctr glu 8min vs. noc glu 8min	513	529.4	-16.44	72	129	0.3709
3	4	3	5	4	5										ctr glu 8min vs. KCl ctr 8min	513	508.1	4.834	72	136	0.1101
3	15	3	4	3	3										ctr glu 8min vs. KCl noc 8min	513	509.6	3.32	72	156	0.07735
4	5	9	4	10	3										ctr glu 8min vs. KCl+glu ctr 8min	513	559.9	-46.96	72	234	1.157
3	5	6	4	5	4										ctr glu 8min vs. KCl+glu noc 8min	513	547	-34.02	72	342	0.871
4	3	3	4	4	5										noc glu 8min vs. KCl ctr 8min	529.4	508.1	21.27	129	136	0.5745
18	4	6	7	4	3										noc glu 8min vs. KCl noc 8min	529.4	509.6	19.76	129	156	0.5511
18	3	7	3	5	4										noc glu 8min vs. KCl+glu ctr 8min	529.4	559.9	-30.53	129	234	0.9241
9	3	3	3	13	10										noc glu 8min vs. KCl+glu noc 8min	529.4	547	-17.59	129	342	0.565
4	3	5	3	3	4										KCl ctr 8min vs. KCl noc 8min	508.1	509.6	-1.514	136	156	0.04283
23	3	6	3	4	14										KCl ctr 8min vs. KCl+glu ctr 8min	508.1	559.9	-51.8	136	234	1.595
6	3	3	3	4	4										KCl ctr 8min vs. KCl+glu noc 8min	508.1	547	-38.86	136	342	1.272
29	4	3	5	4	36										KCl noc 8min vs. KCl+glu ctr 8min	509.6	559.9	-50.28	156	234	1.615
15	4	5	4	4	13										KCl noc 8min vs. KCl+glu noc 8min	509.6	547	-37.34	156	342	1.283
3	3	3	3	3	4										KCl+glu ctr 8min vs. KCl+glu noc 8min	559.9	547	12.94	234	342	0.5063
3	3	5	4	6	3
11	5	3	3	3	3
10	3	6	5	6	3
13	3	5	6	14	5
7	5	4	3	8	8
5	3	7	3	6	4
5	4	5	4	3	4
6	7	8	3	3	3
5	3	4	3	4	5
5	3	8	3	8	4
14	7	4	3	4	3
3	6	3	9	3	28
3	18	4	35	4	6
4	4	3	13	3	5
7	3	9	5	3	3
8	6	3	5	8	6
3	5	9	5	6	6
5	3	3	16	4	16
3	6	3	3	3	5
13	17	11	3	3	9
4	7	8	22	3	9
6	6	3	4	4	4
3	7	5	4	4	10
6	33	5	4	7	18
4	5	3	9	4	5
4	9	5	4	3	3
3	3	3	4	3	3
3	5	3	5	5	5
3	5	3	3	3	7
3	3	3	5	3	3
3	7	3	8	9	23
3	7	3	6	4	6
3	3	3	4	14	4
3	3	4	3	7	7
3	4	29	3	6	7
	3	19	7	6	7
	3	3	6	5	3
	3	3	4	6	8
	3	3	4	3	6
	5	4	3	5	3
	5	10	3	8	3
	83	20	3	17	3
	4	16	7	12	3
	6	16	6	6	4
	9	40	9	5	9
	26	5	4	9	24
	77	3	4	7	28
	4	3	3	12	7
	3	3	3	4	8
	6	3	3	6	6
	5	5	4	4	36
	35	9	3	5	3
	3	6	6	3	8
	8	3	3	4	4
	26	3	8	12	23
	3	3	9	10	7
	8	7	4	3	17
	4	7	4	8	14
	3	6	5	3	7
	7	3	4	3	21
	3	3	3	3	3
	8	4	3	4	3
	3	3	4	6	4
	13	4	3	4	3
	6	128	4	4	4
	6	5	3	6	5
	16	10	3	10	3
	6	4	3	15	7
	3	4	3	20	4
	3	5	16	13	4
	6	4	4	4	12
	3	7	7	7	3
	3	21	4	3	3
	4	3	9	10	4
	4	4	3	3	19
	6	3	3	4	3
	4	3	3	7	3
	4	8	7	7	3
	3	3	5	4	4
	3	3	10	4	5
	6	4	5	5	5
	5	4	4	8	5
	3	3	3	3	5
	8	3	3	4	3
	9	4	3	4	3
	3	3	7	4	3
	3	7	3	3	3
	5	4	4	8	3
	3	6	3	4	5
	3	6	3	3	3
	3	3	26	40	4
	4	3	5	7	31
		4	4	7	19
		4	4	5	7
		4	4	13	3
		6	4	3	13
		4	10	7	10
		3	5	27	8
		3	3	4	4
			6	28	3
			7	4	4
			3	3	4
			3	4	7
			3	3	13
			5	65	3
			6	20	3
			3	7	3
			7	3	6
			5	6	8
			3	7	5
			4	8	13
			3	9	4
			3	4	4
			7	3	10
			3	4	4
			3	3	8
			4	3	3
			6	5	4
			3	15	3
				4	4
				4	3
				3	3
				4	4
				7	3
				3	5
				4	5
				4	3
				4	5
				4	14
				4	4
				3	3
				3	3
				10	9
				4	4
				5	4
				6	6
				3	3
				3	3
				6	7
				3	9
				10	3
				7	5
				13	3
				6	4
				4	3
				11	12
				5	3
				4	4
				6	3
				4	3
				3	3
				3	4
				4	3
				3	13
				3	4
				3	4
				9	7
				4	10
				3	6
				4	5
				19	17
				5	3
				4	5
				3	3
				8	4
				11	6
				3	5
				8	11
				4	9
				5	3
				5	6
				48	19
				7	3
				4	7
				4	7
				4	4
				18	3
				6	4
				6	4
				3	8
				7	3
				3	5
				3	4
				3	7
				4	3
				5	4
				16	6
				4	3
				7	10
				3	5
				3	4
				8	9
				10	3
				4	4
				3	3
				3	4
				3	3
					3
					7
					3
					3
					3
					6
					3
					7
					6
					3
					3
					9
					3
					3
					3
					3
					3
					4
					3
					7
					5
					3
					3
					3
					4
					3
					3
					3
					11
					27
					8
					13
					6
					3
					11
					3
					3
					9
					4
					3
					3
					5
					7
					3
					3
					3
					3
					4
					6
					26
					16
					4
					4
					4
					4
					14
					4
					24
					18
					14
					20
					12
					4
					6
					8
					4
					4
					8
					4
					6
					4
					6
					10
					6
					4
					6
					4
					4
					28
					4
					28
					5
					32
					9
					3
					3
					3
					3
					7
					5
					8
					4
					14
					3
					4
					8
					5
					3
					4
					5
					4
					4
					4
					3
					4
					3
					3
					7

## Sheet: Fig8-FigSuppl1 D
glu ctr	noc glu	KCl ctr	KCl noc	Glu&Kcl ctr	Glu&Kcl noc		Statistical significance calculated using Kruskal-Wallis test of each condition compared to every other condition
75.095	27.945	140.76	16.1	19.78	41.17
116.61	56.58	35.88	18.86	18.745	7.82		Number of families	1
54.625	9.775	0.575	28.175	11.27	62.1		Number of comparisons per family	15
69.23	11.96	0.345	104.305	19.78	25.99		Alpha	0.05
1.84	1.035	0.92	2.99	114.77	18.745
2.99	2.76	0.46	22.655	109.25	160.31		Dunn's multiple comparisons test	Mean rank diff.	Significant?	Summary	Adjusted P Value
109.595	2.875	81.305	1.955	0.46	17.71		glu ctr vs. noc glu	-296.4	Yes	*	0.0295	A-B
97.405	47.84	103.845	7.36	0.69	10.58		glu ctr vs. KCl ctr	407.4	Yes	***	0.0004	A-C
50.14	8.05	30.82	0.575	10.695	21.85		glu ctr vs. KCl noc	233.6	No	ns	0.2269	A-D
73.255	12.88	30.82	2.99	0.46	37.375		glu ctr vs. Glu&Kcl ctr	276.3	Yes	*	0.0349	A-E
138.115	7.475	10.81	0.345	11.96	15.295		glu ctr vs. Glu&Kcl noc	401.7	Yes	****	<0.0001	A-F
94.3	29.21	21.045	89.24	3.68	18.975		noc glu vs. KCl ctr	703.8	Yes	****	<0.0001	B-C
10.81	25.875	1.84	83.49	1.265	100.855		noc glu vs. KCl noc	530	Yes	****	<0.0001	B-D
25.76	0.92	52.785	51.865	1.725	68.195		noc glu vs. Glu&Kcl ctr	572.7	Yes	****	<0.0001	B-E
6.555	124.775	52.555	2.53	0.345	52.67		noc glu vs. Glu&Kcl noc	698.1	Yes	****	<0.0001	B-F
1.15	5.75	0.575	0.92	12.88	45.54		KCl ctr vs. KCl noc	-173.9	No	ns	0.3362	C-D
0	15.64	1.61	1.15	1.38	115.575		KCl ctr vs. Glu&Kcl ctr	-131.1	No	ns	0.8714	C-E
0	20.815	42.78	8.05	16.1	0.92		KCl ctr vs. Glu&Kcl noc	-5.754	No	ns	>0.9999	C-F
11.385	0.92	11.73	0.805	0.69	22.885		KCl noc vs. Glu&Kcl ctr	42.73	No	ns	>0.9999	D-E
13.455	90.965	10.695	7.475	3.335	103.615		KCl noc vs. Glu&Kcl noc	168.1	No	ns	0.1331	D-F
9.775	41.4	71.645	21.16	47.495	7.13		Glu&Kcl ctr vs. Glu&Kcl noc	125.4	No	ns	0.3708	E-F
84.065	15.755	87.975	33.695	127.305	61.41
20.01	15.41	53.015	45.195	5.865	48.415		Test details	Mean rank 1	Mean rank 2	Mean rank diff.	n1	n2	Z
30.36	20.815	76.705	24.495	24.265	51.29		glu ctr vs. noc glu	2592	2888	-296.4	292	663	3.096
162.265	20.01	52.555	6.325	0.345	1.955		glu ctr vs. KCl ctr	2592	2184	407.4	292	637	4.229
126.04	21.045	14.26	32.66	18.4	51.06		glu ctr vs. KCl noc	2592	2358	233.6	292	645	2.429
83.49	47.61	0.92	8.51	0.23	145.475		glu ctr vs. Glu&Kcl ctr	2592	2315	276.3	292	993	3.045
13.34	73.945	3.68	10.12	0.46	84.985		glu ctr vs. Glu&Kcl noc	2592	2190	401.7	292	1492	4.605
76.475	20.01	0.23	153.525	36.8	1.38		noc glu vs. KCl ctr	2888	2184	703.8	663	637	9.306
53.705	48.185	0.115	23.46	80.96	66.355		noc glu vs. KCl noc	2888	2358	530	663	645	7.03
52.67	12.19	89.47	15.18	10.235	33.35		noc glu vs. Glu&Kcl ctr	2888	2315	572.7	663	993	8.377
37.605	1.265	0.69	83.26	51.98	14.835		noc glu vs. Glu&Kcl noc	2888	2190	698.1	663	1492	10.97
1.495	120.29	3.91	52.67	20.355	8.395		KCl ctr vs. KCl noc	2184	2358	-173.9	637	645	2.283
89.355	5.635	3.91	51.52	30.82	0.92		KCl ctr vs. Glu&Kcl ctr	2184	2315	-131.1	637	993	1.895
16.56	68.195	9.315	1.035	22.08	2.875		KCl ctr vs. Glu&Kcl noc	2184	2190	-5.754	637	1492	0.08918
49.22	125.235	2.99	4.485	12.765	10.81		KCl noc vs. Glu&Kcl ctr	2358	2315	42.73	645	993	0.6198
36.685	131.1	0.69	4.37	4.255	0.115		KCl noc vs. Glu&Kcl noc	2358	2190	168.1	645	1492	2.617
8.97	22.54	53.935	1.15	19.435	2.185		Glu&Kcl ctr vs. Glu&Kcl noc	2315	2190	125.4	993	1492	2.246
22.195	39.56	14.03	165.715	33.005	64.285
57.5	5.865	62.215	9.89	27.485	1.265
0.46	100.28	3.335	87.63	50.6	0.575
52.555	38.18	4.025	15.295	161.345	14.49
28.98	56.005	0.69	0.805	115.69	0.345
4.945	47.955	21.965	71.07	23.23	94.99
0.23	9.085	37.26	64.17	38.985	0.115
0	19.55	26.68	6.785	112.01	133.975
0.575	101.315	86.71	123.165	1.265	1.61
0	0.575	16.675	64.745	102.81	29.095
2.185	5.175	0.345	34.385	4.025	74.405
10.005	124.2	2.185	146.28	5.98	31.05
0.345	5.29	123.51	157.32	0.345	0.115
1.265	86.825	28.175	47.035	0.92	95.105
1.38	23.115	26.91	2.53	18.63	29.095
17.71	0.805	0.92	14.95	11.845	62.33
6.9	38.41	7.13	0.69	90.39	5.29
31.74	52.785	41.63	31.625	115.345	23.69
27.025	25.76	0.69	0.92	1.15	26.565
31.28	5.52	8.28	8.625	0.575	2.53
33.005	57.5	5.405	25.99	34.5	1.265
14.72	139.955	7.935	12.765	169.97	1.84
1.265	161.23	7.82	8.51	2.415	40.25
135.47	107.525	35.765	18.63	16.56	59.8
87.055	89.815	3.565	0.46	3.68	107.87
44.275	1.38	23.575	14.95	88.09	30.36
38.64	0.345	39.56	20.7	0.23	45.54
114.655	18.285	4.6	8.165	14.49	10.35
43.125	75.555	86.25	60.145	2.185	0.92
1.84	117.53	62.905	1.15	13.57	0.805
1.61	1.61	31.97	0.345	0.46	77.97
11.385	66.01	14.03	66.125	20.24	1.725
36.34	135.7	24.495	0.115	7.475	100.28
0.575	7.13	34.96	3.335	16.56	44.85
0.575	4.715	41.86	23.92	7.705	5.06
1.035	89.01	2.76	60.95	74.75	3.68
63.48	5.865	4.83	10.925	10.12	0.23
29.785	51.865	4.83	37.03	1.725	14.26
27.485	101.43	10.58	0.23	10.465	47.15
5.635	1.84	47.38	116.38	17.825	50.14
78.2	2.3	18.055	39.33	77.51	0.69
8.625	41.745	31.97	79.81	4.945	8.05
0.92	1.38	41.055	0.69	31.05	140.07
26.335	9.545	14.26	0.46	12.88	58.075
96.83	5.29	1.38	2.415	2.875	79.235
27.6	154.79	24.38	51.98	18.4	25.99
26.91	1.15	10.81	55.775	0.92	100.05
5.98	5.405	0.92	50.485	33.005	48.99
29.9	2.185	12.65	2.3	157.435	0.575
6.21	14.835	83.145	30.36	1.035	28.405
2.875	7.475	47.15	18.055	6.21	30.475
62.79	21.275	99.245	112.93	20.24	24.61
25.185	0.575	22.77	0.69	8.165	95.22
18.975	44.85	153.18	94.875	53.705	123.28
0.69	40.825	1.725	8.05	71.07	6.44
11.5	54.05	45.195	8.28	83.72	29.67
1.15	13.685	119.945	9.775	32.43	4.14
90.505	170.085	32.085	74.29	2.415	2.3
65.32	39.1	4.37	6.44	3.565	0.575
115.23	12.305	40.48	2.76	66.7	0.46
37.26	36.11	9.89	0.46	54.28	0.69
20.47	66.01	8.625	1.955	1.61	11.96
35.995	12.305	40.48	72.22	15.18	1.955
6.44	19.895	100.28	50.14	0.92	7.015
3.22	36.225	8.05	0.345	6.9	1.725
8.05	98.44	4.83	0.115	20.355	4.37
10.35	23.92	4.485	3.45	11.615	2.53
66.7	6.44	1.955	13.915	10.81	93.035
0.46	58.075	87.745	0.575	12.42	0.115
2.185	75.67	5.06	0.575	5.52	5.865
2.53	36.11	10.005	9.315	4.14	11.04
1.495	72.91	15.64	25.875	1.265	124.43
0	34.155	2.3	73.715	13.455	0.805
0.23	10.58	1.035	24.15	161.345	0.575
17.135	7.475	8.165	8.395	17.48	111.55
33.695	4.14	1.035	53.705	0.345	157.55
24.955	34.96	5.635	5.75	0.115	31.855
0.46	18.055	48.07	18.17	54.625	2.07
10.12	47.725	2.07	26.45	23.69	2.99
0.46	32.085	0.115	31.05	46.23	67.735
3.45	21.275	15.18	140.875	1.84	14.375
24.725	27.6	13.11	150.535	11.96	56.695
7.36	3.795	7.015	74.865	48.185	0.23
17.595	170.085	3.68	136.275	62.675	0.46
1.38	4.715	0.23	162.265	116.495	6.9
82.685	26.335	16.905	35.765	25.415	13.8
9.2	80.04	28.06	114.77	136.39	5.405
111.665	58.42	43.24	18.63	3.795	1.265
0.805	48.53	0.46	0.46	127.075	21.965
0.92	77.28	1.495	1.38	11.385	37.95
47.035	81.075	26.45	0.345	112.93	7.82
25.99	32.2	59.455	1.495	88.32	91.54
2.99	6.44	0.92	10.695	65.665	27.6
0.575	10.695	35.42	129.03	35.765	27.025
3.91	36.685	15.755	7.36	15.18	2.185
36.915	31.05	16.79	0.345	7.82	29.67
16.215	50.715	1.725	39.215	49.105	4.485
119.6	65.32	8.165	1.38	56.81	4.255
23.115	10.005	63.825	5.75	85.905	4.37
0	46.23	3.105	146.625	6.785	22.31
18.17	0.575	21.965	6.785	2.415	1.725
57.155	0.575	62.33	40.48	112.355	5.865
18.285	15.065	0.805	165.025	20.01	0.69
23.46	19.665	7.36	1.035	94.76	23.23
1.15	57.73	11.04	1.495	0.805	0.23
28.175	4.945	4.37	0.805	85.445	107.525
19.435	15.295	4.6	2.185	1.955	2.07
1.84	15.41	49.795	1.38	4.37	15.295
23.46	135.7	4.6	35.88	9.315	21.16
7.015	7.13	80.385	4.025	0.345	46.805
1.495	1.38	0.23	2.185	0.345	3.335
24.265	0.345	0.575	10.35	0.575	67.965
17.71	21.045	0.115	2.53	5.29	4.025
13.225	0.115	0.46	15.985	4.715	3.22
0	3.45	34.845	2.99	3.91	0.115
28.405	7.82	3.105	2.53	0.115	26.565
31.855	8.28	7.015	5.29	8.28	1.955
17.25	16.56	11.5	3.68	83.145	154.1
0	1.955	0.115	8.28	7.245	9.89
90.965	5.405	39.445	5.175	8.625	105.57
49.22	24.15	11.385	3.335	0.46	10.235
30.245	2.875	11.04	19.895	22.31	40.48
22.77	9.89	10.12	3.795	10.58	0.92
0	0.575	16.905	47.035	61.295	25.76
5.06	25.875	11.73	1.15	7.245	48.53
12.65	11.04	11.845	7.015	1.495	87.745
0	5.175	7.13	0.46	26.45	11.27
33.695	19.435	2.645	115.69	0.575	0.575
15.41	0.23	6.44	23.46	1.38	13.915
109.02	36.34	1.265	34.04	28.865	80.615
0.575	58.65	2.07	0.805	129.145	1.265
14.145	53.245	24.61	8.97	27.14	9.89
7.705	145.475	4.6	137.31	1.725	1.15
6.325	2.07	0.575	4.255	26.68	107.295
4.485	107.985	6.785	3.91	11.96	107.755
12.765	106.03	3.795	0.345	43.125	53.59
7.82	26.91	22.31	7.13	66.125	0
5.175	9.775	5.405	39.33	0.345	0.115
8.51	109.25	8.395	136.045	14.72	0
1.955	51.175	1.035	1.61	0.69	0
34.385	20.585	11.155	0.69	2.185	6.095
0.92	31.625	154.445	18.285	0.69	0
36.34	78.775	23.345	4.255	0.805	0
15.755	27.255	21.62	1.38	19.55	4.025
9.43	18.515	6.9	1.725	18.86	0
1.495	89.47	104.535	35.65	7.59	0
6.44	77.51	32.775	15.64	14.605	7.13
75.325	5.405	1.495	2.07	65.665	0
97.175	29.9	59.11	0.92	5.635	0
41.63	22.195	6.9	34.615	0.575	21.735
0.46	16.33	1.61	19.78	25.3	0
2.3	1.955	26.565	0.115	48.645	0
0.805	19.78	31.855	0.23	27.255	8.395
0.92	38.41	35.995	0.23	4.83	0
1.265	16.215	0.115	19.09	71.3	0
0.69	18.745	9.775	0.69	1.955	6.785
0.575	47.495	0.115	34.615	3.565	0
3.105	71.185	27.255	168.245	160.54	0
12.535	38.41	1.15	65.665	0.805	1.61
0.575	13.8	6.9	172.73	0.23	0
0.805	163.875	7.245	1.84	39.1	0
1.035	171.005	129.26	0.115	6.095	0.115
5.865	24.265	57.73	6.555	8.05	0
5.75	0.805	1.61	144.325	0.46	0
24.725	41.745	37.26	20.125	1.495	16.675
13.455	27.6	130.64	2.53	11.845	0
0.69	126.845	0.115	57.73	1.725	0
167.095	22.655	19.78	0.115	10.81	7.475
20.47	47.61	1.38	0.69	0.69	0
16.215	58.19	2.53	43.815	0.46	0
1.15	38.985	5.29	13.915	0.69	28.405
9.2	28.635	2.53	19.205	0.23	0
2.645	13.685	4.025	0.92	9.89	0
3.565	86.48	44.39	49.45	1.035	91.655
11.615	12.765	15.87	19.55	0.69	0
7.935	32.89	24.725	0.69	25.3	32.775
2.76	3.22	41.86	7.705	23	28.52
3.105	1.265	23.92	87.745	126.615	102.695
5.635	6.325	78.43	90.275	31.51	59.57
1.955	17.48	0.69	2.415	28.06	4.14
8.74	1.15	0.345	38.64	25.415	4.945
8.28	115.115	1.38	3.45	15.18	0.805
2.415	14.26	2.3	65.55	4.83	0.92
1.035	6.095	1.725	0.92	36.8	16.215
38.64	7.36	5.06	1.15	0.345	8.165
54.97	65.895	0.575	6.67	17.25	53.82
26.105	67.965	0.805	176.065	4.715	74.29
12.65	62.79	7.015	54.395	0.345	150.88
0	4.83	11.615	12.88	83.95	0.69
25.875	57.615	0.69	59.915	0.92	0.345
90.505	57.615	3.335	79.005	1.84	43.7
0	158.7	0.69	0.46	3.91	64.4
6.44	21.16	0.115	0.345	58.765	13.225
2.99	36.11	21.965	28.98	12.075	1.61
34.5	19.665	1.495	75.785	3.45	35.305
50.485	5.405	24.84	0.115	104.765	4.025
11.27	9.775	33.925	0.46	4.025	59.685
0	5.635	114.195	0.23	4.83	115
18.4	21.62	32.2	19.32	34.73	59.57
0.805	88.665	2.76	0.69	4.025	2.415
16.675	136.505	177.675	6.555	9.43	1.38
12.075	8.625	1.725	44.62	73.025	4.37
10.58	5.29	7.59	124.085	1.955	10.12
18.86	13.8	2.76	2.415	0.345	0.575
1.955	1.61	19.435	50.255	69.805	30.36
47.495	81.995	8.395	1.035	0.805	48.875
32.43	1.495	112.24	47.495	10.12	0.46
0.69	24.15	35.075	38.295	26.795	0.575
6.9	38.295	20.24	10.695	2.53	119.255
14.145	3.335	4.6	0.345	13.57	22.655
1.15	0.69	0.92	17.825	28.865	49.105
8.855	2.07	5.06	56.12	5.405	1.38
11.615	5.06	0.115	42.435	0.46	107.065
17.25	14.605	0.46	31.28	24.955	9.315
0.92	35.075	7.36	25.53	4.37	53.245
13.225	8.97	5.75	28.06	2.875	24.38
0.575	4.715	0.345	1.38	0.92	8.05
31.395	34.27	7.59	76.36	2.53	24.265
54.395	54.625	45.195	28.52	1.84	19.895
19.78	114.655	24.61	33.35	109.825	8.28
3.91	103.845	0.115	1.265	0.92	0.805
0.92	5.635	0.345	116.725	20.01	84.985
8.05	16.215	1.265	61.41	88.205	58.535
1.84	2.875	1.955	1.265	2.415	31.97
2.07	0.575	26.795	25.07	5.52	50.485
3.105	2.76	1.61	0.92	0.345	88.665
2.07	0.46	0.115	43.24	129.49	5.175
0.575	55.545	4.255	2.07	4.945	64.4
3.565	87.515	15.64	23.575	15.525	11.96
10.81	27.14	65.435	0.23	1.38	0.345
1.495	15.18	5.06	0.115	3.105	15.64
2.99	48.415	4.14	12.19	12.535	15.64
2.415	1.61	1.84	30.13	4.255	20.47
0	106.375	5.175	10.005	1.955	0.805
0.92	16.215	2.415	17.48	17.365	18.4
0.92	33.81	11.73	14.375	33.12	0.23
2.76	27.485	7.13	6.67	1.035	1.38
3.105	1.84	3.335	4.37	23.805	2.185
5.635	7.59	1.265	40.02	8.165	2.875
1.955	5.405	17.94	30.015	4.025	10.695
8.74	1.955	0.805	101.43	0.46	18.975
10.35	5.175	4.83	13.57	7.36	1.15
0.345	38.64	6.44	0.805	1.38	11.96
2.645	71.185	76.245	21.735	2.875	2.99
6.21	34.845	25.76	0.805	1.84	0.23
2.99	4.37	0	38.64	7.705	2.53
6.785	4.485	1.15	1.61	6.9	18.17
16.905	35.995	5.175	1.15	6.785	0.345
53.475	81.995	2.53	54.97	6.44	5.29
5.635	142.945	3.105	16.215	3.68	12.305
26.105	0.575	6.9	1.265	6.095	1.955
2.875	1.955	2.53	2.645	1.035	2.53
35.65	1.495	3.68	10.58	1.265	14.49
34.385	0.23	12.88	30.245	3.335	0.115
	5.635	20.24	2.53	12.42	8.165
	19.435	0.575	31.05	2.185	3.91
	36.8	11.73	37.605	35.42	4.14
	16.445	2.185	10.12	9.89	122.015
	38.755	12.88	21.735	27.37	17.595
	47.955	22.31	57.73	0.345	2.53
	72.91	10.465	5.405	0.115	4.255
	3.22	0.805	4.025	10.58	0.69
	18.055	0.115	1.955	0.92	25.185
	33.695	0.345	1.035	43.585	54.74
	0	2.185	1.955	44.85	7.36
	71.645	34.615	7.82	10.12	12.765
	10.925	21.275	10.58	123.855	0.575
	37.835	0.23	2.645	82.455	50.83
	8.855	1.725	16.1	71.76	3.91
	30.13	3.335	10.12	1.15	16.79
	28.75	17.25	12.65	24.38	113.045
	48.76	6.21	25.185	2.645	0.23
	3.105	82.57	103.73	16.1	3.68
	24.15	0.92	13.225	15.295	24.15
	10.005	6.785	36.225	25.76	12.995
	9.66	10.235	62.56	1.84	42.78
	4.6	13.11	5.75	2.185	33.35
	12.88	52.785	8.165	1.035	0.805
	54.855	16.1	3.68	20.7	5.75
	126.04	19.435	4.255	2.53	25.76
	17.48	0.575	1.725	1.15	6.67
	58.88	17.25	6.21	13.57	32.66
	26.105	8.625	26.45	1.035	5.865
	46.23	8.74	0.345	95.565	21.85
	6.9	21.735	0.69	32.89	51.98
	6.9	0.805	0.805	17.02	33.005
	0.92	0.46	1.265	98.44	1.15
	2.76	2.07	0.69	3.91	0.46
	37.375	0.345	2.3	141.105	24.84
	122.82	0.92	6.325	6.44	11.73
	144.21	4.37	0.115	4.715	82.11
	0	0.805	0.69	2.415	102.58
	28.29	26.22	1.035	4.83	2.185
	34.04	1.035	3.91	3.91	90.62
	1.265	2.645	5.98	40.825	90.16
	2.53	28.06	14.95	76.245	0.345
	2.415	50.83	24.725	54.855	0.46
	5.175	1.38	2.875	12.42	19.895
	0.575	2.07	5.98	21.85	2.99
	10.925	1.035	3.68	2.99	7.705
	18.63	44.965	4.715	5.865	39.905
	0.46	0.46	0.69	0.345	4.6
	60.49	0.23	16.905	9.66	109.48
	142.715	0.115	1.38	0.575	16.215
	31.74	0.115	6.9	0.115	12.075
	74.405	0.69	5.865	1.265	71.3
	35.075	0.46	12.88	12.305	13.34
	22.195	1.84	22.77	0.575	1.15
	35.88	1.38	8.165	57.04	7.245
	32.085	0.92	7.36	0.115	17.825
	1.955	0.575	13.34	3.795	19.78
	47.035	0.23	29.67	7.705	1.265
	34.615	2.185	4.715	90.62	96.37
	74.405	1.61	2.99	20.01	0.345
	47.15	5.98	0.46	15.985	152.145
	25.76	1.035	176.525	28.405	67.965
	4.6	0.92	1.495	18.285	4.715
	124.89	49.335	2.53	3.91	7.705
	13.455	1.84	18.975	69.69	0.23
	13.915	0.92	145.475	164.22	14.145
	57.155	1.955	1.035	114.885	0.575
	119.945	4.6	4.485	58.305	89.47
	13.455	1.61	27.255	16.1	1.84
	28.865	0.46	4.715	47.035	0.69
	8.625	2.875	0.46	12.995	14.605
	14.49	6.555	0.46	12.305	4.6
	15.295	2.99	1.265	15.41	1.035
	0.575	7.015	1.035	18.86	8.395
	18.055	1.15	0.805	51.75	2.3
	99.475	8.395	22.08	103.96	5.29
	7.13	0.46	9.775	35.305	5.29
	28.175	23.115	13.455	1.265	5.98
	7.475	1.035	30.13	118.68	111.205
	34.73	2.875	37.145	40.25	45.885
	6.21	0.115	34.155	0.805	0.69
	10.12	7.13	7.705	1.38	1.265
	2.99	0.805	135.355	18.63	7.015
	6.9	4.255	3.22	24.265	7.705
	6.9	1.15	7.475	48.185	1.265
	1.265	1.38	33.12	0.69	1.84
	0.115	12.075	18.86	4.255	4.6
	3.795	35.42	7.36	4.83	2.53
	1.035	1.15	10.695	27.6	6.67
	7.015	0.575	6.21	9.2	4.945
	0.46	0.92	23.69	1.495	0.345
	1.61	0.115	72.335	2.185	7.13
	1.61	0.23	0.115	11.385	149.27
	9.66	0.23	0.46	0.575	1.495
	10.235	0.69	5.29	134.895	56.12
	16.79	0.92	5.865	78.775	14.26
	9.315	1.38	22.31	38.985	7.935
	13.34	16.445	0.805	29.44	21.85
	19.78	1.955	7.59	60.835	82.915
	15.295	48.415	59.57	3.795	1.15
	11.5	61.87	74.06	0.805	9.085
	41.63	0.23	0.805	0.345	14.72
	0.69	1.035	1.955	90.85	0.46
	19.435	0.345	2.07	170.89	17.595
	9.66	0.23	14.145	1.035	0.345
	31.28	0.575	2.185	5.865	2.07
	9.545	0.805	3.105	3.335	12.995
	7.82	0.115	28.635	4.945	1.495
	7.82	3.22	14.835	2.07	59.225
	8.97	1.61	13.685	1.61	92.23
	8.05	1.15	1.725	4.6	33.925
	4.945	2.415	1.035	0.46	0.23
	37.03	4.14	3.565	0.115	47.725
	38.985	16.56	1.265	1.265	29.44
	12.42	95.565	2.53	59.225	11.04
	2.07	0.115	0.115	1.15	35.765
	8.28	21.275	61.755	2.3	70.84
	9.89	22.885	81.305	1.84	51.98
	14.03	2.185	49.795	1.15	61.295
	0.805	7.82	3.45	143.98	26.795
	11.04	20.47	0.115	1.725	61.065
	18.055	0.805	0.805	1.495	13.57
	11.5	24.38	1.84	15.065	18.975
	14.95	21.62	3.91	0.345	9.2
	7.475	0.46	0.115	150.305	2.415
	4.6	102.925	2.76	38.18	2.415
	22.885	7.36	12.535	7.935	4.945
	26.45	64.515	5.98	12.88	8.395
	28.175	68.08	10.925	55.545	6.785
	32.315	2.3	2.415	7.475	1.61
	4.83	3.22	14.835	140.3	1.035
	82.11	3.45	0.115	5.865	48.185
	77.855	64.4	13.685	51.06	57.5
	34.155	3.795	25.76	81.305	2.99
	42.205	24.725	21.275	51.175	0.46
	8.28	10.81	2.185	0.23	0.805
	0.805	14.605	35.995	0.805	3.335
	77.855	49.105	8.855	1.035	1.15
	16.445	5.865	99.245	19.205	3.91
	18.86	9.085	12.535	0.805	2.3
	42.205	4.83	87.055	1.265	1.15
	5.06	5.405	19.55	1.61	59.57
	5.75	15.64	1.38	19.665	21.965
	0.69	5.06	1.15	4.255	60.49
	3.335	0.23	1.84	114.31	6.67
	1.725	2.645	3.22	1.84	2.53
	0.575	1.84	7.82	1.38	115.23
	0.23	1.38	12.995	8.855	88.09
	0.23	3.795	2.07	5.75	111.09
	2.07	2.875	1.15	1.035	179.285
	0.46	2.07	3.22	7.705	78.775
	0.69	0.23	5.98	10.58	5.98
	0.69	0.46	1.265	12.19	9.89
	34.04	2.76	31.165	11.5	39.1
	15.525	2.99	10.465	52.095	17.365
	65.32	0.23	56.695	2.07	38.295
	16.56	6.325	4.485	3.68	9.89
	9.89	6.44	13.455	8.855	19.205
	40.94	2.53	11.73	6.325	0.805
	6.095	0.23	22.195	6.9	37.835
	53.36	0.46	55.545	3.22	67.735
	57.155	1.38	63.595	38.755	1.955
	0.92	1.725	83.605	0.23	0.46
	5.06	11.615	17.94	0.92	1.955
	33.925	30.13	123.74	0.92	18.975
	31.165	2.53	17.25	4.945	14.605
	18.17	12.535	6.555	5.29	3.91
	34.27	0.575	9.43	2.3	1.61
	0.69	1.84	8.395	3.22	32.66
	5.635	19.78	8.05	0.115	1.61
	1.265	1.725	11.5	3.335	1.265
	1.61	1.84	0.69	15.87	6.44
	10.005	13.57	1.84	0.345	0.46
	31.855	55.43	15.065	3.91	60.49
	90.85	10.81	8.74	9.43	5.405
	42.205	49.335	0.805	8.74	4.485
	27.6	0.575	3.795	1.61	0.23
	92.23	0.115	34.385	2.875	0.69
	19.32	0.345	1.38	15.41	0
	0.115	26.91	0.115	16.56	4.6
	22.425	4.715	2.53	104.305	0
	46.345	1.38	7.13	0.345	4.255
	57.845	20.585	1.955	39.445	0
	4.715	1.495	11.385	0.69	0
	78.43	1.955	6.67	66.93	0.46
	6.44	1.84	21.39	1.265	0
	30.475	6.095	2.3	8.625	8.51
	34.385	0.46	14.95	1.035	0
	2.3	40.365	20.585	3.91	0
	7.015	1.15	21.735	7.245	0.345
	61.87	3.105	38.41	0.575	0
	61.065	9.43	2.645	36.685	0.575
	22.54	12.305	57.04	25.875	0
	0.46	7.82	1.15	14.605	72.335
	27.6	67.965	1.15	1.725	15.295
	39.56	0.92	0.92	12.535	0.575
	18.285	0.575	0.115	8.395	11.73
	7.13	3.68	5.405	126.155	38.41
	2.645	1.495	2.3	17.135	16.905
	1.495	1.84	0.345	15.065	4.255
	20.585	3.68	3.22	9.775	3.565
	12.535	0.69	2.53	4.14	4.14
	72.68	1.955	4.14	94.415	38.755
	0.805	3.105	5.405	50.715	0.115
	8.625	7.13	4.255	20.93	27.6
	52.9	2.875	4.025	0.345	10.58
	4.83	6.9	11.73	11.5	8.74
	12.535	2.53	1.495	54.05	2.875
	59.685	1.84	9.545	0.805	26.795
	26.91	1.265	5.405	23.575	0.23
	15.64	8.625	2.875	0.69	33.005
	5.865	0	1.84	8.625	22.54
	20.125	28.06	4.485	3.91	9.315
	36.455	3.22	10.235	12.995	14.49
	51.75	7.935	0.345	1.035	28.405
	124.545	1.955	9.315	1.265	20.01
	77.05	1.15	2.875	0.345	0.805
	6.67	0.23	63.135	5.865	13.455
	12.305	0.805	2.415	1.725	3.795
	1.265	2.875	18.055	8.74	7.13
	5.75	0.805	1.15	4.83	1.61
	18.515	1.035	17.825	5.405	42.55
	10.235	3.335	2.645	5.175	11.96
	10.005	1.61	121.44	2.76	42.09
	52.44	0.69	37.26	3.105	11.5
	35.535	1.035	1.15	1.15	59.57
	7.015	2.185	116.035	11.155	81.075
	6.785	4.255	6.21	6.325	2.645
	6.67	0.575	4.37	40.365	13.225
	2.76	4.37	4.6	0	80.385
	8.28	7.475	4.715	32.43	57.5
	13.225	15.985	5.98	0	53.935
	22.31	31.165	9.545	2.3	80.385
	3.565	101.43	11.04	25.185	7.36
	1.035	106.49	3.91	2.415	4.485
	10.12	11.615	1.15	0.46	37.26
	9.43	58.535	2.645	1.725	6.785
	7.245	0	0.115	1.725	69.575
	3.91	0.115	11.96	1.035	0.575
	1.495	0.69	0.805	5.175	0.345
	11.845	1.61	0.46	88.205	13.455
	7.705	0.575	0.115	3.45	60.375
	6.44	0.115	1.265	4.715	49.45
	13.685	1.725	0.23	3.45	5.635
	3.565	3.91	7.36	2.53	2.415
	0	0.345	11.73	20.815	4.485
	27.485	1.495	0.23	0.46	4.945
	40.135	5.75	2.3	1.495	17.94
	16.1	1.84	0.115	0.69	0.46
	19.665	0.575	35.305	5.52	1.035
	6.785	1.725	0.92	1.495	1.15
	36.8	0.575	0.345	6.325	0.345
	0.805	11.5	0.345	20.815	4.945
	0.575	15.065	0	5.29	0.46
	2.99	16.215	0.23	3.22	0.69
	1.61	12.65	1.84	0.92	0.115
	2.645	1.61	4.14	1.15	12.65
	7.13	12.19	2.53	9.775	8.05
	6.44	10.81	7.015	51.98	149.5
	18.745	14.835	0.345	0.46	81.535
	8.51	33.925	1.725	1.265	60.49
	6.44	9.66	0.69	1.955	6.67
	8.74	9.2	1.035	0.575	71.53
	1.61	12.535	2.3	16.905	9.085
	5.06	7.475	5.865	33.81	0.345
	4.485	2.53	1.61	16.33	1.495
	33.35	17.595	2.07	2.53	36.34
	9.545	3.105	3.68	1.265	2.875
	54.165	14.26	14.605	12.535	0.575
	18.17	10.58	1.955	2.3	0.575
	38.87	63.94	0.115	8.05	1.38
	5.29	0.115	1.035	0.69	3.22
	13.455	7.82	3.795	1.035	8.625
	16.215	8.625	13.57	0.115	0.805
	5.06	2.76	39.445	0.46	1.725
	5.52	0.805	15.87	6.67	0.46
	4.485	12.65	117.3	0.69	3.565
	9.2	5.635	0.69	1.38	0.575
	12.075	1.15	1.84	1.035	3.22
	14.95	1.035	4.255	7.82	8.165
	23.345	3.335	3.335	16.445	8.05
	4.83	0.23	1.265	7.82	3.565
	15.87	3.22	0.46	11.73	6.785
	1.725	2.76	0.575	0.23	1.955
	3.45	0.115	1.84	19.435	5.29
	12.305	21.275	2.53	0.46	0.345
	4.14	28.865	2.07	18.86	8.395
	5.865	3.22	1.61	1.725	11.615
	9.315	5.175	0.115	1.15	2.53
	15.525	4.715	4.715	45.195	18.515
	5.75	8.395	1.15	78.775	8.05
	35.075	5.29	2.76	17.02	18.4
	4.83	7.36	0.69	17.48	73.025
	13.455	27.37	0.23	7.935	1.035
	10.12	3.795	0.805	85.1	106.26
	6.21	2.875	4.37	6.67	3.91
	7.245	6.325	0.46	1.84	50.715
	3.45	14.835	4.37	0.115	9.2
	2.76	8.28	8.74	10.235	73.945
	9.085	0.69	13.915	10.12	4.255
	3.795	13.34	2.415	2.99	0.345
	1.84	52.785	6.325	18.975	1.38
	6.785	35.65	7.36	87.17	0.23
	7.36	13.8	9.43	1.035	7.36
	3.565	12.305	12.88	18.63	144.44
	0.92	25.415	4.37	6.325	7.13
	15.87	5.175	77.74	31.51	0.46
	2.07	29.9	131.56	0.69	8.625
	14.26	0.69	1.265	4.945	23.92
	1.84	0.115	0.115	11.27	23.92
	6.785	0.69	0.345	41.4	55.315
	21.39	0.115	0.115	28.405	1.15
	0.92	1.61	0	19.09	1.38
	2.645	1.265	0.92	0.575	0.92
	1.61	1.955	2.185	30.015	21.62
	0.345	2.53	1.725	0.575	5.98
	10.235	1.495	0.92	5.06	51.175
	15.87	2.185	0.575	114.655	1.495
	21.045	1.38	0.115	4.485	4.14
	0.46	0.23	0.345	3.45	0.345
	2.53	1.035	1.955	0.115	98.325
	2.99	1.035	0.345	8.625	31.395
	0.805	0.46	0.46	5.405	38.64
	0.69	1.725	1.61	1.035	83.03
	1.61	0.805	4.715	23.46	57.73
	2.99	0.46	2.3	59.455	57.155
	1.61	1.955	1.495	30.475	1.38
	4.255	1.265	0.345	2.185	23.575
	3.91	0.345	0.46	2.415	0.92
	3.335	2.415	1.035	2.185	104.88
	1.84	0.575	0.69	0.23	2.99
	1.035	0.575	0.115	1.38	20.355
	3.795	1.495	1.84	146.395	1.84
	2.185	0	0.345	14.26	1.495
	9.2	2.415	0.115	22.31	32.2
	45.885	0.69	2.07	0.92	25.185
	1.035	3.105	1.035	0.805	36.34
	5.865	9.545	3.22	21.275	1.61
	10.81	10.005	5.52	33.12	169.97
	23.23	46.23	1.725	8.395	87.745
	4.14	1.61	1.265	41.515	90.965
	3.335	1.495	0	1.15	10.35
	21.505	11.73	8.28	168.935	6.9
	35.075	7.705	7.245	0.805	46
	32.2	1.035	6.325	0.805	6.555
	1.61		5.29	17.25	71.76
	7.245		7.59	7.705	26.91
	12.42		11.04	7.59	1.61
	9.085		17.02	42.32	2.875
	18.63		25.185	11.155	24.84
	1.15		7.36	72.795	1.035
	2.53		0.115	5.75	3.22
	4.485		6.785	0.92	0.69
	9.545			0.115	1.15
	15.985			0.345	0.575
	8.855			11.73	2.99
	0.23			0.69	2.07
	1.61			14.145	1.725
	5.75			36.225	4.37
	4.14			3.105	9.545
	8.28			44.735	13.685
	0.345			8.625	34.73
	15.755			5.405	2.3
	28.98			2.645	50.255
	2.53			12.88	63.825
	46.23			23.805	0.115
	13.11			1.38	5.175
	2.07			23.46	0.23
	1.495			43.815	0.345
	9.43			11.385	9.66
	6.325			0.345	32.2
				19.435	4.37
				30.705	1.725
				41.63	0.575
				7.59	5.75
				9.545	17.365
				30.59	43.355
				10.235	2.53
				0.345	25.645
				3.91	50.945
				7.475	17.825
				38.41	15.755
				2.875	2.07
				1.38	4.255
				8.28	1.38
				42.09	3.335
				0.69	7.015
				0.805	9.2
				0.69	2.875
				0.115	0.115
				0.805	0.115
				0.805	0.23
				3.91	2.07
				5.98	2.76
				0.345	68.77
				135.585	7.015
				0	7.015
				1.495	46.115
				0.23	34.04
				1.725	14.49
				0.805	100.74
				11.04	0
				1.265	10.465
				29.21	0
				12.535	19.205
				28.98	0
				1.725	14.72
				1.495	0
				1.725	0
				5.405	2.99
				1.15	0
				0	172.385
				0.92	0
				3.22	26.335
				3.795	0
				1.495	0
				5.175	7.36
				1.61	0
				1.035	30.13
				13.225	0
				12.765	134.205
				1.61	0
				20.125	0
				13.685	0.805
				10.005	0
				49.91	1.265
				1.495	0
				0.23	95.68
				0.23	0
				0.46	0
				4.83	26.45
				2.07	0
				1.725	6.095
				4.025	0
				8.165	45.54
				0.115	0
				20.585	5.52
				24.15	4.6
				8.97	3.45
				23.345	1.265
				3.91	6.095
				12.65	1.61
				5.175	126.96
				10.005	1.265
				31.28	0.575
				31.28	0.23
				12.535	0.575
				21.045	13.915
				0.23	159.39
				0.46	147.775
				0.46	0.69
				17.135	1.15
				0.805	4.83
				4.945	1.84
				0.805	0.805
				19.205	2.645
				0.46	6.325
				14.03	35.075
				119.025	12.19
				3.22	4.715
				3.22	14.03
				0.46	134.665
				7.36	108.1
				9.66	13.455
				2.07	0.92
				17.135	2.415
				9.66	3.22
				14.72	0.23
				48.645	5.865
				118.795	18.86
				104.19	12.075
				9.775	3.22
				2.3	1.035
				0.345	1.265
				11.615	0.345
				0.575	3.45
				5.405	47.955
				1.61	67.39
				6.325	11.04
				13.455	34.04
				1.035	13.455
				8.05	4.715
				13.915	8.625
				30.475	25.76
				1.15	8.855
				52.21	1.495
				5.405	19.895
				2.645	18.975
				12.88	12.65
				23.805	43.125
				24.84	35.305
				34.73	30.59
				4.255	0.805
				4.83	6.555
				10.58	3.45
				4.025	0.46
				81.305	6.555
				6.095	4.485
				1.265	23.69
				0.575	0.23
				0.23	2.07
				0.345	0.115
				1.265	1.035
				0.575	1.725
				0.345	0.345
				4.485	3.335
				1.61	40.595
				6.67	3.91
				63.71	30.245
				67.505	16.675
				83.49	45.54
				0.69	72.91
				0.23	86.71
				0.345	2.07
				0.23	1.495
				5.52	0.92
				1.61	1.15
				3.91	2.07
				2.645	1.725
				3.565	0.345
				3.795	1.15
				0.345	0.92
				10.465	0.805
				26.91	7.36
				0.805	43.24
				10.35	14.835
				0.46	72.68
				1.035	64.055
				1.035	117.185
				1.84	1.15
				4.83	0.46
				1.38	1.495
				1.955	0.345
				13.455	1.035
				0.805	5.635
				6.9	7.475
				0.46	28.98
				9.545	4.485
				1.265	0.115
				22.195	0.575
				0.575	0.115
				2.07	0.115
				0.345	1.955
				0.575	0.345
				1.15	18.515
				0.575	10.12
				2.53	1.035
				3.91	0.115
				11.5	2.99
				1.61	7.13
				6.44	4.83
				0.345	22.655
				8.855	1.725
				0.805	2.185
				2.53	17.825
				5.635	1.725
				5.98	48.53
				0.575	45.885
				1.84	52.785
				7.13	0.345
				4.715	1.265
				10.81	31.97
				3.795	1.265
				1.955	7.59
				1.84	0.69
				3.45	16.33
				0.69	64.63
				1.035	30.935
				4.255	1.61
				0.92	0.23
				7.475	151.8
				0.115	0.805
				0.23	1.035
				19.895	0.575
				4.485	8.97
				4.83	1.15
				11.27	40.825
				1.495	16.675
				17.48	42.895
				0.575	130.295
				1.035	2.3
				0.69	1.955
				0.115	8.165
				0.575	8.855
				0.115	51.75
				1.61	52.67
				1.495	29.9
				2.99	4.83
				1.495	90.85
				1.61	0.575
				0.345	0.69
				0.92	0.115
				3.91	3.105
				5.06	1.725
				2.3	0.115
				2.99	1.725
				36.34	2.99
				75.44	58.765
				1.725	9.2
				0.345	12.995
				0.575	1.955
				0.23	0.69
				0.805	11.385
				0.345	15.18
				0.69	5.405
				4.485	25.645
				1.15	4.83
				0.345	1.495
				2.185	0.23
				3.91	1.15
				38.985	1.035
				2.3	0.345
				17.25	1.38
				31.625	2.185
				30.475	7.245
				15.41	0.46
				91.425	1.15
				9.545	2.3
				27.83	0.575
				1.035	5.865
				79.35	0.345
				24.84	3.22
				98.785	2.185
				2.3	1.61
				0.92	0.46
				0.23	2.645
				7.59	1.265
				2.415	0.46
				3.335	3.45
				1.61	1.38
				0.69	0.345
				2.645	1.725
				4.37	1.495
				3.105	6.67
				1.38	3.68
				0.46	12.765
				5.635	32.775
				0.69	1.955
				1.15	8.625
				1.035	128.57
				15.87	64.515
				12.995	11.845
				0.23	36.915
				80.5	14.605
				17.365	1.61
				20.47	89.93
				7.705	123.165
				0.575	3.335
				2.3	3.335
				0.115	4.37
				70.725	3.91
				66.355	0.46
				4.715	4.6
				22.31	1.495
				0.69	0.46
				82.455	46
				2.185	4.945
				1.495	0
				1.15	0.115
				0.69	0
				1.035	0.92
				0.575	0
				0.115	0.69
				0.69	0
				0.575	0.69
				0.69	0
				0.345	30.82
				0.575	0
				3.105	2.99
				1.61	0.575
				2.07	3.105
				0	3.91
				4.255	50.025
				8.28	1.84
				4.14	42.435
				2.3	66.355
				1.265	2.185
				8.05	80.5
				21.85	0.805
				2.185	44.275
				20.815	27.6
				3.105	3.565
				7.59	5.865
				11.73	5.98
				13.34	21.505
				28.06	20.7
				19.78	22.195
				18.17	3.45
				17.25	35.305
				0.69	28.865
				43.125	17.94
				12.88	9.66
				15.065	1.61
				4.945	7.935
				24.84	96.37
				29.555	7.935
				53.705	10.58
				30.82	20.125
				3.105	5.405
				47.84	45.425
				3.335	91.08
					54.51
					12.305
					8.97
					1.84
					3.91
					41.515
					3.45
					7.13
					3.335
					61.985
					1.84
					87.745
					54.165
					17.48
					2.07
					17.595
					5.175
					12.88
					21.275
					0.92
					26.795
					1.035
					2.3
					59.8
					5.865
					11.385
					4.715
					1.38
					16.905
					2.53
					2.76
					4.37
					10.925
					14.72
					3.91
					4.14
					0.115
					1.15
					1.035
					0.345
					0
					1.38
					0.23
					0.345
					0.69
					0.575
					8.625
					0.345
					1.495
					1.035
					0.69
					2.53
					1.035
					0.345
					5.52
					1.15
					0.575
					1.38
					88.435
					6.21
					0
					2.185
					0
					1.15
					0
					6.44
					0
					3.22
					0
					1.38
					0
					2.645
					0
					0.115
					0.345
					0.345
					0.69
					0.23
					2.645
					2.07
					0.115
					2.415
					2.415
					0.345
					2.76
					3.795
					2.3
					28.75
					29.21
					1.38
					3.68
					6.325
					2.53
					7.245
					0.805
					11.385
					9.43
					10.12
					13.57
					28.98
					6.21
					6.555
					4.255
					0.69
					1.955
					66.47
					9.315
					35.305
					4.83
					8.05
					7.705
					38.41
					78.89
					150.88
					38.18
					63.48
					6.9
					20.7
					1.84
					4.485
					0.46
					13.685
					10.695
					68.08
					20.125
					9.775
					4.14
					107.41
					0
					9.315
					0
					1.38
					0
					0.115
					0
					5.06
					0
					128.225
					0
					47.725
					0
					51.75
					0
					0.345
					0.115
					1.84
					1.495
					5.98
					8.395
					1.61
					15.065
					7.475
					3.45
					2.3
					28.06
					1.38
					22.655
					34.73
					0.575
					1.84
					1.61
					1.61
					0.805
					1.84
					10.12
					39.675
					81.075
					19.78
					56.81
					42.78
					12.65
					7.705
					70.955
					8.28
					0
					1.38
					0
					3.335
					0
					0.69
					0
					5.405
					0
					2.99
					0
					0.69
					0
					12.075
					0
					0.46
					0
					0.23
					0.805
					0.575
					2.875
					0.46
					1.15
					2.07
					1.035
					1.84
					0.92
					1.84
					3.565
					3.45
					6.67
					2.99
					10.58
					6.21
					11.04
					2.3
					3.795
					1.61
					0.345
					5.29
					1.15
					5.635
					0.575
					5.175
					0.92
					2.07
					8.74
					13.8
					2.3
					1.84
					7.475
					7.935
					24.955
					0
					0.575
					0
					1.265
					0
					5.52
					0
					3.335
					0
					0.345
					0
					2.3
					0
					2.3
					0
					21.965
					0
					48.185
					0
					1.15
					9.2
					16.1
					7.13
					1.15
					25.875
					12.535
					0.92
					5.52
					18.17
					0.115
					1.495
					0.115
					1.38
					34.27
					1.61
					8.165
					12.535
					52.9
					1.15
					0.23
					0.345
					11.5
					26.68
					9.43
					23.46
					31.28
					12.42
					1.84
					11.155
					0.575
					0.69
					21.965
					14.835
					18.515
					12.19
					0.92
					32.315
					114.54
					1.725
					0.805
					0.46
					1.38
					0.46
					0.23
					2.645
					0.345
					0.805
					1.38
					1.955
					2.415
					1.61
					2.415
					3.105
					4.485
					0.92
					1.955
					11.5
					18.86
					0
					7.245
					0
					1.15
					0
					1.035
					0
					3.335
					0
					0.69
					0
					3.795
					0
					5.75
					0
					1.035
					0
					10.58
					0
					27.37
					0
					6.9
					55.2
					7.475
					0
					9.66
					34.615
					3.91
					78.775
					0
					61.87
					0
					46.575
					15.525
					0.575
					31.28
					0
					8.855
					4.485
					0
					30.705
					0
					0.345
					0.69
					2.53
					0.23
					7.015
					1.15
					0.575
					0.575
					2.185
					0.575
					5.98
					2.645
					3.91
					0.575
					1.15
					1.265
					6.325
					1.725
					2.07
					3.795
					1.61
					2.185
					1.84
					1.035
					3.105
					2.3
					1.38
					5.98
					0.575
					0.115
					0.92
					1.035
					4.6
					1.035
					0
					15.64
					6.555
					0
					51.175
					22.08
					3.68
					0
					11.96
					92.92
					0.345
					0.69
					0.46
					0.575
					0.69
					1.15
					3.22
					4.6
					39.215
					72.105
					78.085
					6.095
					0.46
					63.595
					71.415
					15.41
					23.69
					2.875
					5.52
					39.445
					1.15
					48.875
					1.265
					0.46
					3.68
					5.635
					51.98
					17.825
					1.495
					22.655
					0.92
					6.785
					11.5
					11.96
					8.28
					0.805
					27.485
					43.47
					2.415
					7.245
					17.135
					19.665
					2.875
					4.37
					11.96
					41.745
					1.61
					0.575
					0.115
					2.53
					1.265
					0
					3.105
					0.69
					1.15
					3.335
					1.955
					0.92
					7.13
					2.07
					4.14
					0.805
					11.845
					11.73
					6.67
					23.92
					1.495
					5.175
					6.095
					5.865
					3.45
					16.1
					35.305
					0.575
					0.46
					1.38
					0.69
					1.61
					0.69
					3.91
					1.495
					2.53
					6.555
					8.165
					15.41
					8.395
					0.115
					8.97
					2.76
					10.695
					3.45
					4.83
					0.23
					3.795
					1.38
					9.2
					1.61
					18.975
					57.845
					0.575
					1.955
					32.43
					12.535
					0.69
					114.77
					4.6
					1.15
					124.315

## Sheet: Fig8-FigSuppl1 E
	time period (sec)	0-30	30-60	60-90	90-120	120-150	150-180	180-210	210-240	240-270	270-300	300-330	330-360	360-390	390-420
Glu DMSO	count	2	52	97	90	103	102	100	80	52	36	62	63	66	56
	%	0.208117	5.41103	10.0937	9.36524	10.718	10.6139	10.4058	8.32466	5.41103	3.7461	6.45161	6.55567	6.86785	5.82726
Glu Noc	count	78	200	162	183	118	91	85	84	90	102	86	123	115	138
	%	4.71299	12.0846	9.78852	11.0574	7.12991	5.49849	5.13595	5.07553	5.43807	6.16314	5.19637	7.43202	6.94864	8.33837
KCl DMSO	count	930	350	167	88	61	43	37	39	32	32	26	29	16	35
	%	49.3369	18.5676	8.85942	4.66844	3.23607	2.28117	1.96286	2.06897	1.69761	1.69761	1.37931	1.53846	0.848806	1.85676
KCL Noc	count	904	312	148	123	90	69	70	41	36	36	35	46	61	43
	%	44.8858	15.4916	7.34856	6.10725	4.46872	3.42602	3.47567	2.03575	1.78749	1.78749	1.73784	2.28401	3.0288	2.13505
Glu+KCl DMSO	count	1101	364	186	82	77	92	61	79	85	97	89	77	63	79
	%	43.4834	14.376	7.34597	3.23855	3.04107	3.63349	2.40916	3.12006	3.35703	3.83096	3.51501	3.04107	2.48815	3.12006
Glu+Kcl Noc	count	634	113	87	75	80	56	63	40	45	53	42	42	40	37
	%	45.0604	8.03127	6.18337	5.33049	5.68586	3.9801	4.47761	2.84293	3.19829	3.76688	2.98507	2.98507	2.84293	2.62971
