# Supplementary material for: Microtubules regulate pancreatic β-cell heterogeneity via spatiotemporal control of insulin secretion hot spots
Source: eLife. 2021 Nov 16;10:e59912. doi: 10.7554/eLife.59912 (PMC8635970; doi:10.7554/eLife.59912)
Supplement: Figure 8—source data 1. [file elife-59912-fig8-data1.xlsx]

## Sheet: Figure8 E ev per cell
Kcl ctr 2.5 min	Kcl noc 2.5 min	Glu+Kcl ctr 2.5 min	Glu+Kcl noc 2.5 min				Kcl ctr 2.5 min	Kcl noc 2.5 min	Glu+Kcl ctr 2.5 min	Glu+Kcl noc 2.5 min				Statistical significance calculated using Kruskal-Wallis test of each condition compared to every other condition
0	12	2	0											Number of families	1
0	8	0	28											Number of comparisons per family	6
0	0	1	5											Alpha	0.05
1	8	4	29			stdev	6.94772	4.47893	7.54773	8.81586
0	4	8	8			mean	2.66782	2.1596	5.43791	7.69697				Dunn's multiple comparisons test	Mean rank diff.	Significant?	Summary	Adjusted P Value
0	0	11	12			var coef	2.60427	2.07396	1.38798	1.14537				Kcl ctr 2.5 min vs. Kcl noc 2.5 min	24.5	No	ns	>0.9999	A-B
0	0	0	23											Kcl ctr 2.5 min vs. Glu+Kcl ctr 2.5 min	-303.7	Yes	****	<0.0001	A-C
1	2	4	3											Kcl ctr 2.5 min vs. Glu+Kcl noc 2.5 min	-471.8	Yes	****	<0.0001	A-D
0	2	0	8											Kcl noc 2.5 min vs. Glu+Kcl ctr 2.5 min	-328.2	Yes	****	<0.0001	B-C
0	12	5	13											Kcl noc 2.5 min vs. Glu+Kcl noc 2.5 min	-496.3	Yes	****	<0.0001	B-D
1	34	0	18											Glu+Kcl ctr 2.5 min vs. Glu+Kcl noc 2.5 min	-168.1	Yes	***	0.0004	C-D
0	53	0	0
0	15	9	8											Test details	Mean rank 1	Mean rank 2	Mean rank diff.	n1	n2	Z
0	20	1	8											Kcl ctr 2.5 min vs. Kcl noc 2.5 min	841.2	816.7	24.5	578	708	0.8201
0	7	2	7											Kcl ctr 2.5 min vs. Glu+Kcl ctr 2.5 min	841.2	1145	-303.7	578	306	8.062
0	23	4	11											Kcl ctr 2.5 min vs. Glu+Kcl noc 2.5 min	841.2	1313	-471.8	578	330	12.83
0	20	0	0											Kcl noc 2.5 min vs. Glu+Kcl ctr 2.5 min	816.7	1145	-328.2	708	306	9.003
0	11	10	6											Kcl noc 2.5 min vs. Glu+Kcl noc 2.5 min	816.7	1313	-496.3	708	330	13.97
0	0	8	23											Glu+Kcl ctr 2.5 min vs. Glu+Kcl noc 2.5 min	1145	1313	-168.1	306	330	3.976
0	5	6	22
1	11	0	22
1	5	7	12
0	3	8	1
0	7	6	2
0	3	6	5
1	16	8	9
2	11	0	1
2	4	13	0
0	13	6	4
0	23	21	25
0	1	2	13
0	0	0	13
0	30	7	0
0	0	37	5
0	15	8	0
0	4	38	1
0	9	21	42
1	1	37	8
0	0	3	3
0	8	20	22
0	0	4	21
0	4	2	16
0	15	16	3
0	0	8	11
0	4	29	2
0	0	8	3
0	0	5	5
0	0	1	7
0	1	9	2
0	20	11	23
0	0	2	6
11	0	4	5
0	0	1	13
4	1	1	15
0	0	3	8
0	0	17	6
4	4	2	2
0	2	0	2
0	7	17	3
0	0	10	1
1	3	10	1
1	1	10	8
0	23	1	7
0	32	0	14
0	16	0	12
0	5	0	5
0	5	1	1
0	6	0	1
0	5	4	30
0	1	0	7
0	5	8	5
0	0	16	6
0	2	4	10
0	2	9	4
0	4	9	8
0	7	3	7
7	1	1	7
0	5	3	7
0	8	2	17
1	1	4	43
1	4	3	3
0	2	1	19
1	1	14	7
0	7	15	7
0	0	3	1
0	0	8	13
0	2	5	6
0	0	0	52
0	0	14	7
1	5	0	9
0	0	6	7
0	0	2	3
1	0	5	13
1	6	0	1
0	0	5	20
0	2	1	3
0	0	3	10
0	0	2	30
7	0	6	2
4	0	2	5
15	2	0	28
24	0	4	2
5	1	3	6
18	0	1	11
0	2	2	5
7	1	0	1
13	0	3	26
1	0	4	14
35	1	1	0
13	2	1	1
13	3	3	5
11	3	2	32
8	0	1	1
0	0	6	4
12	0	9	5
26	0	0	0
0	0	4	13
0	0	0	5
18	0	1	8
4	2	1	4
9	1	0	4
11	0	7	0
52	0	8	14
8	0	3	7
9	0	1	3
7	0	1	0
11	0	2	4
14	7	16	0
6	9	4	3
3	5	2	0
0	2	0	7
4	0	12	4
6	0	12	1
2	11	3	4
1	4	12	4
11	4	0	6
19	0	5	12
2	1	7	2
4	0	13	18
15	1	4	12
3	0	1	3
7	4	2	0
13	0	0	6
10	1	34	3
5	3	0	8
3	0	7	2
6	0	6	4
1	0	0	23
12	0	0	7
8	0	1	6
9	0	2	7
4	1	3	4
9	7	1	0
4	3	9	0
2	3	8	10
12	3	8	4
3	0	0	0
1	0	7	0
3	2	33	0
0	6	11	7
1	2	1	5
2	0	3	4
1	2	44	0
2	0	11	3
1	0	39	31
11	0	16	3
0	1	0	12
2	0	10	15
2	0	0	10
4	0	1	5
0	0	11	34
2	0	12	6
5	0	4	18
3	12	10	4
4	0	8	20
0	2	2	48
2	8	2	17
5	0	13	1
0	0	8	5
2	5	0	4
0	3	3	25
0	0	10	17
5	0	6	12
0	2	6	5
1	0	0	15
15	1	0	0
3	10	3	2
1	8	15	14
0	2	13	20
0	0	9	6
2	3	23	15
4	2	9	8
5	5	12	5
11	0	4	7
5	0	5	8
0	5	7	11
0	1	7	3
0	0	14	1
1	0	4	4
16	6	2	1
16	5	2	0
17	0	2	1
20	1	1	7
8	4	4	6
3	9	1	1
23	7	0	4
25	6	3	5
0	0	0	0
0	1	0	0
0	0	11	5
0	9	9	0
2	2	1	13
1	0	2	0
0	2	11	10
27	0	0	0
38	1	0	1
5	0	18	2
3	0	4	0
0	0	20	1
1	0	0	1
2	0	1	6
0	0	3	10
2	1	10	2
12	0	2	3
2	0	0	14
0	0	0	18
3	0	0	25
0	0	1	4
3	0	0	3
1	1	0	23
0	0	2	11
10	0	6	3
1	0	0	0
1	0	3	8
3	0	0	2
0	0	3	7
0	0	0	1
1	0	4	0
0	0	0	4
3	0	2	4
3	0	0	10
0	0	0	1
1	1	0	6
3	3	0	0
1	0	1	6
4	0	4	3
0	0	0	6
0	0	0	0
7	0	0	3
0	0	2	24
3	0	44	0
1	0	20	20
0	0	2	22
0	2	16	14
0	0	8	20
1	0	0	8
1	1	0	0
0	0	15	24
0	4	15	8
0	0	8	0
1	0	11	4
0	0	6	2
0	0	18	24
0	0	3	24
0	0	6	18
0	0	0	30
0	0	1	12
0	4	3	9
0	1	3	19
0	0	6	29
0	0	3	4
0	0	1	0
0	0	0	1
0	0	8	0
0	0	14	0
0	0	0	0
115	0	3	3
1	0	9	0
0	1	8	6
2	0	9	8
3	0	0	1
0	1	0	10
7	0	0	6
2	0	0	23
6	0	0	22
2	1	0	1
1	2	0	5
7	0	0	0
10	0	0	2
1	0	0	0
0	1	0	20
2	0	0	0
0	2	0	14
0	1	0	8
0	4	0	0
0	1	0	1
3	2	0	5
1	0	0	3
3	0	0	4
4	0	0	0
0	0	0	0
0	0	0	0
0	0	0	15
0	0	0	7
1	0	0	4
0	0	0	6
0	0		2
0	4		5
3	1		2
3	6		1
0	1		0
3	13		2
1	0		2
6	5		0
2	10		0
2	1		0
0	0		0
0	1		2
0	15		2
0	1		2
26	0		1
0	2		0
1	2		0
5	3		0
0	0		0
0	0		0
0	0		0
0	0		1
0	0		1
0	0		1
0	0
0	0
0	0
0	0
0	0
0	0
0	0
0	0
7	0
1	0
2	0
5	0
0	0
0	0
0	0
0	0
0	0
0	0
3	0
2	0
0	0
0	0
0	0
2	0
0	0
0	4
0	3
0	0
0	1
1	0
0	0
0	1
2	7
0	0
0	0
0	0
0	1
1	0
0	7
2	0
0	0
0	1
1	1
1	0
10	1
8	0
0	0
3	0
1	1
1	0
0	1
3	10
0	0
0	8
1	0
1	1
0	0
0	0
0	1
0	0
1	2
4	2
3	3
1	0
0	1
5	0
3	0
0	0
2	3
0	0
0	0
0	0
0	0
0	1
0	4
0	1
1	1
0	0
0	1
0	0
0	0
1	0
0	0
1	0
1	0
1	0
6	0
0	1
0	0
0	0
0	0
0	2
0	2
0	8
1	2
0	3
1	0
0	0
1	0
1	0
0	0
0	0
0	0
9	0
3	0
1	1
1	0
2	3
0	10
0	1
0	2
0	2
0	1
5	0
0	0
2	2
0	4
1	4
1	1
2	0
0	1
2	2
2	3
6	0
2	0
0	3
0	3
0	5
0	8
0	2
0	0
3	1
0	0
0	0
1	1
2	1
0	0
2	0
0	0
1	2
1	0
0	0
0	0
1	0
0	0
1	0
1	0
2	0
0	0
6	8
4	2
1	0
0	0
0	0
0	0
0	1
2	0
5	0
0	1
1	2
4	2
0	0
1	0
0	3
1	7
0	0
1	0
0	0
0	0
0	0
0	0
0	0
0	0
12	0
2	1
4	0
2	3
0	0
0	0
0	0
1	3
0	0
0	0
1	0
3	0
1	1
0	2
0	0
0	0
2	0
3	0
0	0
0	0
0	0
0	0
0	3
1	1
1	1
0	0
0	1
0	1
1	1
5	2
0	0
0	0
1	0
0	1
0	0
0	0
0	0
0	0
14	0
4	4
1	2
5	1
15	0
0	0
0	0
0	1
1	0
0	1
3	3
9	0
2	1
8	0
2	1
14	0
2	0
3	0
2	0
2	0
3	1
3	0
3	0
2	1
0	1
0	2
1	7
0	1
3	1
0	19
6	0
1	4
4	6
6	4
1	1
9	0
13	0
	0
	10
	7
	3
	6
	7
	0
	2
	5
	6
	2
	2
	17
	6
	2
	3
	1
	13
	2
	2
	0
	1
	1
	1
	0
	7
	0
	0
	1
	0
	7
	0
	4
	0
	0
	1
	0
	0
	8
	8
	2
	15
	6
	0
	0
	3
	2
	0
	0
	0
	1
	0
	4
	2
	3
	0
	4
	0
	0
	1
	0
	3
	0
	9
	0
	0
	2
	0
	3
	0
	2
	0
	1
	2
	4
	0
	2
	0
	0
	0
	0
	0
	4
	0
	4
	0
	9
	3
	3
	4
	0
	2
	0
	0
	0
	0
	0
	4
	6
	2
	2
	0
	7
	0
	0
	0
	7
	6
	6
	0
	2
	1
	1
	0
	0
	2
	0
	6
	9
	6
	2
	11
	1
	11
	2
	1
	0
	1
	0
	0

## Sheet: Figure8 F
%cells w clusters/islet							Ordinary One-way Anova
Kcl ctr	Kcl noc	Ctr Glu&KCl	Noc Glu&KCl
0	44.6809	31.8182	66.6667				Number of families	1
0	34.375	57.8947	50				Number of comparisons per family	6
8.33333	6.66667	47.619	61.9048				Alpha	0.05
53.125	16	25	60.5263
31.25	14.8936	41.1765	38.8889				Tukey's multiple comparisons test	Mean Diff.	95.00% CI of diff.	Below threshold?	Summary	Adjusted P Value
26.8293	6.25	14.2857	54.5455				Kcl ctr vs. Kcl noc	-0.9705	-16.49 to 14.55	No	ns	0.9984	A-B
7.01754	5.45455	36.3636	36.3636				Kcl ctr vs. Ctr Glu&KCl	-21.81	-37.33 to -6.286	Yes	**	0.0025	A-C
8.33333	0	45.4545	60				Kcl ctr vs. Noc Glu&KCl	-38.56	-54.08 to -23.04	Yes	****	<0.0001	A-D
11.5385	12.2449	59.2593	23.0769				Kcl noc vs. Ctr Glu&KCl	-20.84	-36.36 to -5.315	Yes	**	0.0042	B-C
0	4.7619	7.14286	83.3333				Kcl noc vs. Noc Glu&KCl	-37.59	-53.11 to -22.07	Yes	****	<0.0001	B-D
0	4.16667	57.1429	26.6667				Ctr Glu&KCl vs. Noc Glu&KCl	-16.75	-32.27 to -1.226	Yes	*	0.0297	C-D
0	2.7027	15.7895	35.7143
2.27273	0	14.2857	50				Test details	Mean 1	Mean 2	Mean Diff.	SE of diff.	n1	n2	q	DF
2.85714	24.4444	37.5	72.2222				Kcl ctr vs. Kcl noc	11.86	12.83	-0.9705	5.863	15	15	0.2341	56
26.3158	15.7895	14.2857	36.3636				Kcl ctr vs. Ctr Glu&KCl	11.86	33.67	-21.81	5.863	15	15	5.261	56
							Kcl ctr vs. Noc Glu&KCl	11.86	50.42	-38.56	5.863	15	15	9.301	56
							Kcl noc vs. Ctr Glu&KCl	12.83	33.67	-20.84	5.863	15	15	5.027	56
							Kcl noc vs. Noc Glu&KCl	12.83	50.42	-37.59	5.863	15	15	9.067	56
							Ctr Glu&KCl vs. Noc Glu&KCl	33.67	50.42	-16.75	5.863	15	15	4.04	56

## Sheet: Figure8 G
% secr cells w clusters							Ordinary One-way Anova
Kcl ctr	Kcl noc	Ctr Glu&KCl	Noc Glu&KCl
0	58.3333	46.6667	77.7778				Number of families	1
0	45.8333	64.7059	61.5385				Number of comparisons per family	6
33.3333	15.7895	50	61.9048				Alpha	0.05
60.7143	34.7826	36.3636	60.5263
34.8837	26.9231	50	41.1765				Tukey's multiple comparisons test	Mean Diff.	95.00% CI of diff.	Below threshold?	Summary	Adjusted P Value
42.3077	33.3333	16.6667	66.6667				Kcl ctr vs. Kcl noc	-5.575	-23.40 to 12.25	No	ns	0.8407	A-B
16	12.5	48	50				Kcl ctr vs. Ctr Glu&KCl	-23.98	-41.50 to -6.464	Yes	**	0.0034	A-C
14.2857		52.6316	64.2857				Kcl ctr vs. Noc Glu&KCl	-41.17	-58.69 to -23.66	Yes	****	<0.0001	A-D
42.8571	27.2727	66.6667	42.8571				Kcl noc vs. Ctr Glu&KCl	-18.4	-36.23 to -0.5784	Yes	*	0.0405	B-C
0	11.1111	9.09091	86.2069				Kcl noc vs. Noc Glu&KCl	-35.6	-53.42 to -17.77	Yes	****	<0.0001	B-D
0	9.09091	80	33.3333				Ctr Glu&KCl vs. Noc Glu&KCl	-17.19	-34.71 to 0.3221	No	ns	0.0562	C-D
0	9.09091	30	50
4.54545	0	33.3333	59.0909				Test details	Mean 1	Mean 2	Mean Diff.	SE of diff.	n1	n2	q	DF
7.69231	32.3529	50	86.6667				Kcl ctr vs. Kcl noc	19.41	24.98	-5.575	6.728	15	14	1.172	55
34.4828	33.3333	16.6667	66.6667				Kcl ctr vs. Ctr Glu&KCl	19.41	43.39	-23.98	6.611	15	15	5.129	55
							Kcl ctr vs. Noc Glu&KCl	19.41	60.58	-41.17	6.611	15	15	8.807	55
							Kcl noc vs. Ctr Glu&KCl	24.98	43.39	-18.4	6.728	14	15	3.868	55
							Kcl noc vs. Noc Glu&KCl	24.98	60.58	-35.6	6.728	14	15	7.482	55
							Ctr Glu&KCl vs. Noc Glu&KCl	43.39	60.58	-17.19	6.611	15	15	3.678	55

## Sheet: Figure8 H ev per clus
2.5 min Kcl ctr	2.5 min Kcl noc	2.5 min Kcl+glu ctr	2.5 min Kcl+glu noc				2.5 min Kcl ctr	2.5 min Kcl noc	2.5 min Kcl+glu ctr	2.5 min Kcl+glu noc				Statistical significance calculated using Kruskal-Wallis test of each condition compared to every other condition
9	4	5	6
4	21	5	4											Number of families	1
3	41	4	3											Number of comparisons per family	6
3	23	6	14			stdev	11.3643	5.78918	4.68261	4.69789				Alpha	0.05
17	21	3	10			mean	7.23853	6.05128	6	6.02602
19	6	3	3			var coef	1.56997	0.956686	0.780435	0.779601				Dunn's multiple comparisons test	Mean rank diff.	Significant?	Summary	Adjusted P Value
13	19	3	6											Kcl ctr 2.5 min vs. Kcl noc 2.5 min	33.56	No	ns	>0.9999	A-B
13	4	3	8											Kcl ctr 2.5 min vs. Glu+Kcl ctr 2.5 min	-327.8	Yes	****	<0.0001	A-C
4	9	3	3											Kcl ctr 2.5 min vs. Glu+Kcl noc 2.5 min	-367.1	Yes	****	<0.0001	A-D
16	3	17	9											Kcl noc 2.5 min vs. Glu+Kcl ctr 2.5 min	-361.4	Yes	****	<0.0001	B-C
6	7	12	11											Kcl noc 2.5 min vs. Glu+Kcl noc 2.5 min	-400.7	Yes	****	<0.0001	B-D
7	9	12	10											Glu+Kcl ctr 2.5 min vs. Glu+Kcl noc 2.5 min	-39.3	No	ns	>0.9999	C-D
4	11	19	4
4	3	9	3											Test details	Mean rank 1	Mean rank 2	Mean rank diff.	n1	n2	Z
10	3	24	9											Kcl ctr 2.5 min vs. Kcl noc 2.5 min	639.6	606.1	33.56	417	555	1.217
13	7	8	9											Kcl ctr 2.5 min vs. Glu+Kcl ctr 2.5 min	639.6	967.4	-327.8	417	201	8.97
4	3	7	4											Kcl ctr 2.5 min vs. Glu+Kcl noc 2.5 min	639.6	1007	-367.1	417	329	11.7
7	16	7	8											Kcl noc 2.5 min vs. Glu+Kcl ctr 2.5 min	606.1	967.4	-361.4	555	201	10.31
9	17	11	4											Kcl noc 2.5 min vs. Glu+Kcl noc 2.5 min	606.1	1007	-400.7	555	329	13.53
6	13	6	5											Glu+Kcl ctr 2.5 min vs. Glu+Kcl noc 2.5 min	967.4	1007	-39.3	201	329	1.031
3	10	3	4
3	7	10	3
4	12	5	4
3	5	12	3
5	4	3	3
25	4	4	4
6	4	4	3
3	6	3	4
3	3	3	3
3	3	4	4
3	3	3	4
5	3	3	13
5	3	9	4
4	5	5	27
4	4	3	13
4	3	4	4
8	3	8	3
4	3	4	3
3	3	3	3
4	3	4	5
3	3	3	5
9	7	3	4
3	30	3	4
9	9	4	3
3	5	3	5
3	5	3	3
4	13	3	8
7	3	3	6
3	3	4	5
4	17	4	3
4	3	4	6
3	4	4	6
3	4	8	6
3	5	4	9
3	3	7	3
3	7	6	4
25	6	6	7
15	3	3	3
3	7	3	5
3	5	8	3
3	4	3	3
4	3	8	5
9	3	4	4
19	3	7	3
16	4	4	3
16	3	4	3
38	3	4	4
5	4	6	4
3	3	3	5
3	4	9	3
3	4	10	9
3	3	3	23
5	6	13	26
8	4	4	6
5	3	3	8
3	3	5	6
3	3	3	26
7	3	10	6
4	15	3	13
3	3	4	17
4	7	5	10
3	5	7	6
3	7	4	17
109	5	4	3
5	4	8	3
7	3	4	6
3	3	4	3
5	3	3	3
7	4	25	7
21	3	7	3
4	3	7	4
3	4	4	3
3	5	11	9
3	4	3	10
4	3	7	3
3	3	26	3
6	7	4	4
4	4	4	6
6	3	6	3
6	5	20	4
3	3	7	4
3	7	3	4
4	3	4	3
4	3	5	3
4	4	6	3
6	4	8	3
4	3	3	30
3	6	3	19
3	4	3	6
	3	5	11
	3	4	10
	7	3	7
	3	4	4
	3	4	3
	4	4	4
	6	3	6
	3	9	5
		4	3
		5	3
		5	4
		3	6
		3	5
		6	4
		3	4
		10	4
		7	4
		10	6
		3	5
		4	3
		9	3
		5	4
		4	3
		5	8
		4	4
		3	3
		4	3
		4	3
		17	3
		4	9
		3	3
		3	5
		10	3
		3	4
		7	3
		4	3
		32	4
		3	3
		6	4
		4	3
		4	7
		18	3
		6	4
		6	10
		3	6
		4	5
		3	12
		3	3
		3	5
		11	3
		3	4
		8	6
		10	5
		4	11
		3	6
		3	3
			6
			19
			3
			7
			7
			4
			3
			4
			4
			6
			3
			5
			4
			7
			3
			4
			5
			9
			5
			3
			4
			3
			4
			3
			6
			3
			5
			6
			3
			3
			5
			3
			3
			3
			4
			3
			3
			3
			11
			24
			6
			13
			4
			3
			11
			3
			3
			9
			4
			3
			3
			5
			5
			3
			6
			24
			16
			4
			4
			4
			4
			14
			4
			18
			10
			20
			12
			4
			6
			12
			8
			4
			4
			4
			6
			4
			6
			4
			4
			4
			4
			11
			4
			14
			5
			7
			18
			3
			7
			8
			4
			14
			3
			3
			6
			5
			3
			4
			4
			4
			4
			3
			3
			3

## Sheet: Figure8 I cl per cell
2.5 min Kcl ctr	2.5 min Kcl noc	2.5 min Kcl+glu ctr	2.5 min Kcl+glu noc											Statistical significance calculated using Kruskal-Wallis test of each condition compared to every other condition
0	2	0	0
0	1	0	3											Number of families	1
0	0	0	0											Number of comparisons per family	6
0	1	1	4			stdev	0.558417	0.489846	0.916906	0.982222				Alpha	0.05
0	0	1	0			mean	0.181661	0.161017	0.51634	0.775758
0	0	2	2			var	3.07395	3.0422	1.77578	1.26615				Dunn's multiple comparisons test	Mean rank diff.	Significant?	Summary	Adjusted P Value
0	0	0	2											Kcl ctr 2.5 min vs. Kcl noc 2.5 min	-1.903	No	ns	>0.9999	A-B
0	0	0	0											Kcl ctr 2.5 min vs. Glu+Kcl ctr 2.5 min	-197.5	Yes	****	<0.0001	A-C
0	0	0	1											Kcl ctr 2.5 min vs. Glu+Kcl noc 2.5 min	-366.5	Yes	****	<0.0001	A-D
0	0	0	1											Kcl noc 2.5 min vs. Glu+Kcl ctr 2.5 min	-195.6	Yes	****	<0.0001	B-C
0	2	0	2											Kcl noc 2.5 min vs. Glu+Kcl noc 2.5 min	-364.6	Yes	****	<0.0001	B-D
0	2	0	0											Glu+Kcl ctr 2.5 min vs. Glu+Kcl noc 2.5 min	-169	Yes	****	<0.0001	C-D
0	2	1	0
0	2	0	1											Test details	Mean rank 1	Mean rank 2	Mean rank diff.	n1	n2	Z
0	0	0	1											Kcl ctr 2.5 min vs. Kcl noc 2.5 min	866.4	868.3	-1.903	578	708	0.08471
0	0	0	1											Kcl ctr 2.5 min vs. Glu+Kcl ctr 2.5 min	866.4	1064	-197.5	578	306	6.971
0	5	0	0											Kcl ctr 2.5 min vs. Glu+Kcl noc 2.5 min	866.4	1233	-366.5	578	330	13.26
0	2	1	1											Kcl noc 2.5 min vs. Glu+Kcl ctr 2.5 min	868.3	1064	-195.6	708	306	7.134
0	0	1	3											Kcl noc 2.5 min vs. Glu+Kcl noc 2.5 min	868.3	1233	-364.6	708	330	13.65
0	0	0	4											Glu+Kcl ctr 2.5 min vs. Glu+Kcl noc 2.5 min	1064	1233	-169	306	330	5.314
0	1	0	3
0	0	1	1
0	0	1	0
0	1	0	0
0	0	1	1
0	1	0	2
0	1	0	0
0	0	1	0
0	2	1	0
0	1	2	1
0	0	0	1
0	0	0	2
0	5	2	0
0	0	3	1
0	2	0	0
0	1	4	0
0	1	2	5
0	0	4	1
0	0	0	0
0	1	1	3
0	0	0	3
0	0	0	3
0	2	1	0
0	0	1	1
0	0	3	0
0	0	1	0
0	0	0	1
0	0	0	1
0	0	0	0
0	1	2	3
0	0	0	0
1	0	0	1
0	0	0	1
1	0	0	1
0	0	0	1
0	0	3	1
1	0	0	0
0	0	0	0
0	1	3	0
0	0	2	0
0	0	1	0
0	0	2	0
0	1	0	2
0	3	0	2
0	1	0	2
0	0	0	0
0	1	0	0
0	1	0	0
0	0	0	3
0	0	0	1
0	1	1	0
0	0	2	1
0	0	0	1
0	0	1	1
0	1	1	2
0	1	0	0
1	0	0	1
0	1	0	0
0	0	0	1
0	0	1	2
0	0	0	0
0	0	1	2
0	0	1	1
0	1	2	1
0	0	0	0
0	0	1	2
0	0	0	1
0	0	0	2
0	0	3	1
0	1	0	1
0	0	1	0
0	0	0	1
0	0	0	2
0	1	0	0
0	0	0	3
0	0	0	0
0	0	0	1
0	0	0	4
1	0	1	0
0	0	0	0
1	0	0	2
2	0	0	0
0	0	0	0
2	0	0	1
0	0	0	0
0	0	0	0
2	0	0	1
0	0	1	2
3	0	0	0
1	0	0	0
1	0	0	0
1	0	0	1
1	0	0	0
0	0	0	0
0	0	1	1
2	0	0	0
0	0	1	2
0	0	0	0
2	0	0	1
0	0	0	0
0	0	0	0
2	0	1	0
5	0	0	1
1	0	0	1
0	0	0	1
0	0	0	0
1	0	1	0
3	1	2	0
0	1	0	0
0	0	0	0
0	0	0	1
0	0	1	1
1	0	2	0
0	1	0	1
0	0	2	0
1	0	0	1
2	0	0	2
0	0	0	0
0	0	2	2
1	0	1	2
0	0	0	0
1	1	0	0
2	0	0	1
0	0	4	1
0	0	0	0
0	0	1	0
1	0	1	0
0	0	0	4
1	0	0	1
1	0	0	1
2	0	0	2
0	0	0	0
1	1	0	0
1	0	0	0
0	0	1	1
2	1	1	1
0	0	0	0
0	0	1	0
0	0	2	0
0	1	1	0
0	0	0	0
0	0	0	1
0	0	5	0
0	0	3	0
0	0	4	3
2	0	2	1
0	0	0	1
0	0	0	1
0	0	0	2
0	0	0	1
0	0	1	3
0	0	1	1
0	0	0	1
0	1	1	0
1	0	1	2
0	0	0	3
0	0	0	1
0	0	1	0
0	0	1	1
0	0	0	1
0	0	0	1
0	0	1	1
0	0	0	1
0	0	0	1
0	0	0	1
2	0	0	0
0	1	1	1
0	1	3	3
0	0	3	2
0	0	1	0
0	0	4	2
0	0	1	0
0	0	1	1
2	0	0	1
1	0	0	0
0	0	1	1
0	0	1	0
0	0	2	0
0	0	0	0
0	1	0	0
0	1	0	0
3	0	0	0
2	0	0	1
1	0	0	1
0	1	0	0
2	1	0	1
2	0	0	0
0	0	0	0
0	0	0	0
0	0	1	1
0	1	0	0
0	0	0	1
0	0	0	0
0	0	1	2
3	0	0	0
1	0	0	0
1	0	2	0
0	0	1	0
0	0	3	0
0	0	0	0
0	0	0	2
0	0	0	2
0	0	1	0
2	0	0	1
0	0	0	1
0	0	0	1
1	0	0	2
0	0	0	0
0	0	0	0
0	0	0	1
0	0	0	1
2	0	1	0
0	0	0	0
0	0	1	1
0	0	0	0
0	0	0	1
0	0	0	0
0	0	0	0
0	0	0	1
0	0	0	0
0	0	0	2
0	0	0	0
0	0	0	1
0	1	0	0
0	0	0	1
0	0	0	0
0	0	0	2
0	0	0	0
1	0	0	0
0	0	0	2
0	0	3	0
0	0	1	2
0	0	0	3
0	0	2	2
0	0	0	2
0	0	0	1
0	0	0	0
0	0	1	2
0	1	2	1
0	0	0	0
0	0	0	0
0	0	0	0
0	0	2	5
0	0	0	1
0	0	0	2
0	0	0	2
0	0	0	1
0	1	0	1
0	0	0	2
0	0	1	2
0	0	0	1
0	0	0	0
0	0	0	0
0	0	1	0
0	0	1	0
0	0	0	0
2	0	0	0
0	0	1	0
0	0	0	0
0	0	1	1
0	0	0	0
0	0	0	0
1	0	0	1
0	0	0	2
0	0	0	2
0	0	0	0
0	0	0	0
0	0	0	0
2	0	0	0
0	0	0	0
0	0	0	2
0	0	0	0
0	0	0	2
0	0	0	1
0	0	0	0
0	0	0	0
0	0	0	1
0	0	0	1
0	0	0	0
0	0	0	0
0	0	0	0
0	0	0	0
0	0	0	1
0	0	0	1
0	0	0	1
0	0	0	0
0	0		0
0	0		1
0	0		0
0	0		0
0	0		0
0	2		0
0	0		0
1	0		0
0	1		0
0	0		0
0	0		0
0	0		0
0	1		0
0	0		0
1	0		0
0	0		0
0	0		0
1	0		0
0	0		0
0	0		0
0	0		0
0	0		0
0	0		0
0	0		0
0	0
0	0
0	0
0	0
0	0
0	0
0	0
0	0
0	0
0	0
0	0
0	0
0	0
0	0
0	0
0	0
0	0
0	0
0	0
0	0
0	0
0	0
0	0
0	0
0	0
0	1
0	0
0	0
0	0
0	0
0	0
0	0
0	1
0	0
0	0
0	0
0	0
0	0
0	1
0	0
0	0
0	0
0	0
0	0
0	0
0	0
0	0
0	0
0	0
0	0
0	0
0	1
0	0
0	2
0	0
0	0
0	0
0	0
0	0
0	0
0	0
0	0
0	0
0	0
0	0
0	0
0	0
0	0
0	1
0	0
0	0
0	0
0	0
0	0
0	1
0	0
0	0
0	0
0	0
0	0
0	0
0	0
0	0
0	0
0	0
0	0
0	0
0	0
0	0
0	0
0	0
0	0
0	0
0	1
0	0
0	0
0	0
0	0
0	0
0	0
0	0
0	0
0	0
0	0
0	0
0	0
0	0
0	0
0	0
0	0
0	0
0	0
0	0
0	0
0	0
0	0
0	0
0	0
0	0
0	0
0	0
0	0
0	0
0	0
0	0
0	0
0	0
0	0
0	1
0	0
0	0
0	0
0	0
0	0
0	0
0	0
0	0
0	0
0	0
0	0
0	0
0	0
0	0
0	0
0	0
0	0
0	0
0	0
0	0
0	1
0	0
0	0
0	0
0	0
0	0
0	0
0	0
0	0
0	0
0	0
0	0
0	0
0	0
0	0
0	2
0	0
0	0
0	0
0	0
0	0
0	0
0	0
0	0
2	0
0	0
0	0
0	0
0	0
0	0
0	0
0	0
0	0
0	0
0	0
0	0
0	0
0	0
0	0
0	0
0	0
0	0
0	0
0	0
0	0
0	0
0	0
0	0
0	0
0	0
0	0
0	0
0	0
1	0
0	0
0	0
0	0
0	0
0	0
0	0
0	0
0	0
1	0
0	0
0	0
0	0
1	0
0	0
0	0
0	0
0	0
0	0
0	0
2	0
0	0
1	0
0	0
3	0
0	0
0	0
0	0
0	0
0	0
0	0
1	0
0	0
0	0
0	0
0	0
0	0
0	0
0	1
1	0
0	0
0	0
1	1
0	0
1	0
1	0
	0
	2
	1
	0
	0
	1
	0
	0
	0
	1
	0
	0
	1
	1
	0
	0
	0
	1
	0
	0
	0
	0
	0
	0
	0
	0
	0
	0
	0
	0
	1
	0
	1
	0
	0
	0
	0
	0
	1
	0
	0
	2
	1
	0
	0
	0
	0
	0
	0
	0
	0
	0
	0
	0
	0
	0
	0
	0
	0
	0
	0
	0
	0
	0
	0
	0
	0
	0
	0
	0
	0
	0
	0
	0
	0
	0
	0
	0
	0
	0
	0
	0
	0
	0
	0
	0
	1
	0
	0
	1
	0
	0
	0
	0
	0
	0
	0
	1
	0
	0
	0
	0
	1
	0
	0
	0
	1
	0
	0
	0
	0
	0
	0
	0
	0
	0
	0
	1
	1
	1
	0
	0
	0
	1
	0
	0
	0
	0
	0
	0

## Sheet: Figure8 I' stacked
num clsters p cell	0	1	2	3	4	5+
DMSO KCl	509	41	22	5	0	1
Noc KCl	618	73	14	1	0	2
DMSO KCl+Glu	207	63	20	10	5	1
Noc KCl+Glu	166	100	44	14	4	2

## Sheet: Figure8 J cl per s cell
2.5 min Kcl ctr	2.5 min Kcl noc	2.5 min Kcl+glu ctr	2.5 min Kcl+glu noc											Statistical significance calculated using Kruskal-Wallis test of each condition compared to every other condition
0	2	0	3
0	1	0	0											Number of families	1
0	1	1	4											Number of comparisons per family	6
0	0	1	0			stdev	0.749325	0.669117	1.01484	1.00722				Alpha	0.05
0	0	2	2			mean	0.365854	0.341317	0.724771	0.937729
0	0	0	2			var	2.04815	1.96039	1.40022	1.0741				Dunn's multiple comparisons test	Mean rank diff.	Significant?	Summary	Adjusted P Value
0	0	0	0											Kcl ctr 2.5 min vs. Kcl noc 2.5 min	-11.18	No	ns	>0.9999	A-B
0	2	1	1											Kcl ctr 2.5 min vs. Glu+Kcl ctr 2.5 min	-265.1	Yes	****	<0.0001	A-C
0	2	0	1											Kcl ctr 2.5 min vs. Glu+Kcl noc 2.5 min	-395.3	Yes	****	<0.0001	A-D
1	2	0	2											Kcl noc 2.5 min vs. Glu+Kcl ctr 2.5 min	-254	Yes	****	<0.0001	B-C
1	2	0	0											Kcl noc 2.5 min vs. Glu+Kcl noc 2.5 min	-384.1	Yes	****	<0.0001	B-D
1	0	1	1											Glu+Kcl ctr 2.5 min vs. Glu+Kcl noc 2.5 min	-130.2	Yes	**	0.0014	C-D
0	0	1	1
0	5	0	1											Test details	Mean rank 1	Mean rank 2	Mean rank diff.	n1	n2	Z
1	2	1	1											Kcl ctr 2.5 min vs. Kcl noc 2.5 min	765.1	776.3	-11.18	531	708	0.5012
0	0	1	3											Kcl ctr 2.5 min vs. Glu+Kcl ctr 2.5 min	765.1	1030	-265.1	531	218	8.479
0	1	0	4											Kcl ctr 2.5 min vs. Glu+Kcl noc 2.5 min	765.1	1160	-395.3	531	273	13.66
0	0	1	3											Kcl noc 2.5 min vs. Glu+Kcl ctr 2.5 min	776.3	1030	-254	708	218	8.434
0	0	0	1											Kcl noc 2.5 min vs. Glu+Kcl noc 2.5 min	776.3	1160	-384.1	708	273	13.87
0	1	1	0											Glu+Kcl ctr 2.5 min vs. Glu+Kcl noc 2.5 min	1030	1160	-130.2	218	273	3.687
0	0	1	0
1	1	2	1
0	1	0	2
1	0	2	0
2	2	3	0
0	1	0	1
2	0	4	1
0	5	2	2
2	2	4	1
0	1	0	0
3	1	1	5
1	0	0	1
1	1	0	0
1	0	1	3
1	2	1	3
0	0	3	3
2	0	1	0
2	1	0	1
0	0	0	0
0	0	0	0
2	0	2	1
5	1	0	1
1	0	0	0
0	0	0	3
0	1	0	0
1	3	0	1
3	1	3	1
0	0	0	1
0	1	3	1
0	1	2	1
1	0	1	0
0	0	2	0
0	1	0	0
1	0	0	0
2	0	0	0
0	1	1	0
0	1	2	2
1	0	0	2
0	1	1	2
1	0	1	0
2	0	0	0
0	0	0	0
0	0	0	3
0	0	0	1
1	1	1	0
0	0	0	1
1	1	1	1
1	1	1	1
2	0	2	2
0	0	0	0
1	0	1	1
1	0	0	0
0	0	3	1
2	0	1	2
0	0	0	0
0	0	0	2
0	0	0	1
0	0	0	1
0	0	0	0
0	1	0	2
0	1	1	1
0	0	0	2
2	0	0	1
0	1	0	1
0	0	0	0
0	0	0	1
0	0	0	2
0	0	1	0
0	1	0	3
1	0	0	0
0	0	0	1
0	0	0	4
0	1	0	0
0	0	0	0
0	0	1	2
2	1	1	0
0	0	0	0
0	1	0	1
0	0	1	0
0	0	0	0
0	0	0	1
2	1	0	2
1	0	0	0
0	0	1	0
0	0	2	1
0	0	0	0
3	0	0	0
2	0	1	1
1	1	2	2
0	1	0	0
2	0	2	1
2	0	0	0
0	0	0	0
0	0	2	1
3	0	1	1
1	0	0	1
1	1	0	0
0	1	4	0
0	0	1	1
0	0	1	1
0	1	0	0
2	1	0	1
0	0	0	0
1	0	0	1
0	1	0	2
0	0	1	0
2	0	1	2
0	0	1	2
0	0	2	0
0	0	1	1
0	0	0	1
0	1	0	0
0	0	5	0
0	0	3	0
0	1	4	4
0	1	2	1
0	0	0	1
1	0	0	2
0	0	1	0
0	0	1	1
0	0	0	1
0	0	1	0
0	0	1	0
2	0	0	1
0	0	0	0
0	0	1	3
0	0	1	1
1	0	0	1
0	0	1	1
0	0	0	2
0	0	0	1
0	2	1	3
0	0	3	1
2	1	3	1
0	0	1	0
0	0	4	2
0	1	1	3
0	0	1	1
0	0	0	0
0	0	0	1
0	0	1	1
0	1	1	1
0	0	2	1
0	0	0	1
0	0	0	1
1	1	0	1
0	0	0	1
0	1	0	3
1	0	0	2
0	0	0	0
1	0	0	2
0	0	1	0
0	0	0	1
0	1	0	1
0	2	0	0
0	0	1	1
0	0	2	0
0	0	1	0
0	0	3	0
0	0	0	0
0	0	0	0
0	1	1	1
0	0	0	1
0	1	0	0
0	0	0	1
0	0	1	0
0	0	1	1
0	0	0	1
0	0	0	2
0	0	0	0
0	1	0	0
0	0	0	0
0	0	0	0
0	0	3	2
0	0	1	2
0	0	0	0
0	0	2	1
0	0	0	1
0	0	1	1
0	0	2	2
0	0	0	0
0	0	0	0
0	0	0	1
0	0	2	1
0	0	0	0
0	0	0	1
0	0	0	0
0	0	0	1
0	0	0	0
0	0	1	1
0	1	0	0
0	0	0	2
0	0	1	0
0	0	1	1
0	0	0	1
0	0	1	0
0	1	0	2
0	0	1	0
0	0		2
0	0		2
0	0		3
0	0		2
0	0		2
0	2		1
0	0		2
0	0		1
0	0		0
0	0		0
0	0		5
0	0		1
0	0		2
0	0		2
0	0		1
0	0		1
0	0		2
0	0		2
0	0		1
0	0		0
0	0		0
0	0		0
0	0		1
0	0		0
0	0		0
2	0		1
0	0		2
0	0		2
0	0		0
0	0		0
0	0		0
0	0		2
0	0		2
0	0		1
0	1		0
0	0		1
0	0		1
0	1		0
1	0		1
0	2		1
1	1		1
0	0		0
0	0		0
0	1		1
1	0		0
0	0		0
0	1		0
2	0		0
0	0		0
1	1		0
0	1		0
3	0		0
0	0		0
0	0		0
0	1		0
0	0
0	0
0	0
1	0
0	0
0	0
0	0
1	1
0	1
0	0
1	1
0	0
1	0
1	2
	1
	0
	0
	0
	0
	0
	0
	0
	0
	0
	0
	0
	0
	0
	0
	0
	0
	0
	0
	0
	1
	0
	0
	1
	0
	1
	0
	0
	0
	1
	1
	0
	0
	0
	0
	0
	0
	1
	1
	1
	0
	0
	0
	1
	0
	0
	0

## Sheet: Figure8 J' stacked
num clsters p secr cell	0	1	2	3	4	>4
DMSO KCl	218	41	22	5	0	1
Noc KCl	244	73	14	1	0	2
DMSO KCl+Glu	119	63	20	10	5	1
Noc KCl+Glu	109	100	44	14	4	2

## Sheet: Figure8 K
Kcl ctr 2.5 min	Kcl noc 2.5 min	Glu+Kcl ctr 2.5 min	Glu+Kcl noc 2.5 min				Kcl ctr 2.5 min	Kcl noc 2.5 min	Glu+Kcl ctr 2.5 min	Glu+Kcl noc 2.5 min					Statistical significance calculated using Kruskal-Wallis test of each condition compared to every other condition
0	9	0	0
0	6	0	20												Number of families	1
0	0	0	0												Number of comparisons per family	6
0	7	4	22			stdev	6.22074	3.5579	6.40516	6.99748					Alpha	0.05
0	0	3	2			mean	1.34429	0.956215	3.05882	4.59697
0	0	10	6			var coef	4.62752	3.72081	2.09399	1.52219					Dunn's multiple comparisons test	Mean rank diff.	Significant?	Summary	Adjusted P Value
0	0	0	19												Kcl ctr 2.5 min vs. Kcl noc 2.5 min	4.457	No	ns	>0.9999	A-B
0	0	0	0												Kcl ctr 2.5 min vs. Glu+Kcl ctr 2.5 min	-224.7	Yes	****	<0.0001	A-C
0	2	0	4												Kcl ctr 2.5 min vs. Glu+Kcl noc 2.5 min	-392.4	Yes	****	<0.0001	A-D
0	11	0	7												Kcl noc 2.5 min vs. Glu+Kcl ctr 2.5 min	-229.2	Yes	****	<0.0001	B-C
0	30	0	16												Kcl noc 2.5 min vs. Glu+Kcl noc 2.5 min	-396.9	Yes	****	<0.0001	B-D
0	52	0	0												Glu+Kcl ctr 2.5 min vs. Glu+Kcl noc 2.5 min	-167.7	Yes	****	<0.0001	C-D
0	13	3	0
0	16	0	4												Test details	Mean rank 1	Mean rank 2	Mean rank diff.	n1	n2	Z
0	5	0	3												Kcl ctr 2.5 min vs. Kcl noc 2.5 min	860.5	856.1	4.457	578	709	0.1871
0	19	0	7												Kcl ctr 2.5 min vs. Glu+Kcl ctr 2.5 min	860.5	1085	-224.7	578	306	7.479
0	16	0	0												Kcl ctr 2.5 min vs. Glu+Kcl noc 2.5 min	860.5	1253	-392.4	578	330	13.38
0	10	6	2												Kcl noc 2.5 min vs. Glu+Kcl ctr 2.5 min	856.1	1085	-229.2	709	306	7.883
0	0	3	13												Kcl noc 2.5 min vs. Glu+Kcl noc 2.5 min	856.1	1253	-396.9	709	330	14.01
0	0	0	17												Glu+Kcl ctr 2.5 min vs. Glu+Kcl noc 2.5 min	1085	1253	-167.7	306	330	4.971
0	4	0	14
0	0	3	10
0	0	7	0
0	6	4	0
0	0	3	5
0	13	3	5
0	8	0	0
0	0	7	0
0	10	3	0
0	17	17	19
0	1	0	11
0	0	0	11
0	27	6	0
0	0	33	4
0	10	3	0
0	3	27	0
0	2	17	29
0	0	35	3
0	0	0	0
0	3	17	18
0	0	0	14
0	0	2	11
0	6	9	3
0	0	3	5
0	0	13	0
0	0	2	0
0	0	0	2
0	0	0	4
0	1	1	0
0	15	6	13
0	0	0	0
9	0	0	4
0	0	0	8
3	0	0	5
0	0	0	6
0	0	11	4
2	4	0	0
0	0	0	0
0	3	10	0
0	0	5	0
1	3	4	0
0	0	6	2
0	17	0	6
0	28	0	10
0	13	0	10
0	0	0	0
0	3	0	1
0	3	0	0
0	2	4	26
0	0	0	2
0	4	4	0
0	0	13	3
0	0	0	10
0	0	4	2
0	3	6	6
0	5	0	5
4	0	0	3
0	3	0	1
0	0	0	16
0	0	2	35
0	0	2	1
0	0	1	13
0	0	8	5
0	7	8	1
0	0	0	1
0	0	4	13
0	2	1	3
0	0	0	50
0	0	11	3
0	4	0	3
0	0	3	0
0	0	0	2
0	0	0	11
0	3	0	0
0	0	0	16
0	0	0	0
0	0	0	6
0	0	0	17
3	0	5	0
0	0	0	0
15	0	0	24
14	0	0	0
1	0	0	0
10	0	0	10
0	0	0	0
1	0	0	0
5	0	0	19
0	0	2	9
34	0	0	0
6	0	0	0
11	0	0	0
10	0	0	20
6	0	0	0
0	0	0	0
7	0	4	4
25	0	0	0
0	0	3	10
0	0	0	3
9	0	0	5
0	0	0	4
0	0	0	0
7	0	1	0
43	0	0	5
5	0	3	5
0	0	0	2
0	0	0	0
6	0	2	0
12	3	13	0
1	4	0	0
0	0	0	0
0	0	0	4
0	0	8	3
3	0	8	0
0	7	3	3
0	2	10	0
7	0	0	3
12	0	0	7
0	0	0	0
0	0	8	11
8	0	3	6
0	0	0	0
4	3	0	0
8	0	0	4
3	0	29	2
0	0	0	0
0	0	7	0
3	0	5	0
0	0	0	17
3	0	0	6
4	0	0	3
7	0	0	6
4	0	0	0
3	5	0	0
3	0	1	0
0	0	7	7
8	2	3	4
0	0	0	0
0	0	4	0
0	0	30	0
0	3	5	0
0	0	0	0
0	0	0	3
0	0	42	0
0	0	10	0
0	0	35	16
7	0	8	3
0	0	0	8
0	0	10	8
0	0	0	6
0	0	0	3
0	0	11	17
0	0	9	1
0	0	0	5
0	5	5	0
3	0	5	9
0	0	0	33
0	0	0	9
0	0	9	0
0	0	5	5
0	0	0	3
0	0	1	8
0	0	3	6
0	0	1	3
0	0	3	3
0	0	0	6
8	0	0	0
0	6	3	1
0	4	11	10
0	0	11	8
0	0	5	0
0	0	19	13
0	0	6	0
0	0	4	4
8	0	0	6
3	0	0	1
0	0	3	7
0	0	3	0
0	0	13	0
0	0	0	0
11	3	0	0
14	4	0	0
14	0	0	0
18	0	0	2
3	0	0	3
0	3	0	1
23	4	0	3
20	0	0	0
0	0	0	0
0	0	0	0
0	0	4	3
0	3	0	0
0	0	0	5
0	0	0	0
0	0	11	6
24	0	0	0
38	0	0	0
4	0	13	0
0	0	3	0
0	0	17	0
1	0	0	0
0	0	0	6
0	0	0	7
0	0	7	0
5	0	0	3
0	0	0	9
0	0	0	14
3	0	0	20
0	0	0	1
2	0	0	0
0	0	0	22
0	0	0	3
8	0	2	0
1	0	0	0
0	0	2	3
0	0	0	0
0	0	0	5
0	0	0	0
0	0	0	0
0	0	0	2
0	0	0	1
0	0	0	8
0	0	0	0
0	0	0	4
0	3	0	0
0	0	0	6
0	0	0	0
0	0	0	4
0	0	0	0
4	0	0	0
0	0	0	16
0	0	39	0
0	0	18	20
0	0	0	18
0	0	12	8
0	0	0	16
0	0	0	4
0	0	0	0
0	0	3	24
0	4	5	8
0	0	2	0
0	0	3	0
0	0	0	0
0	0	11	18
0	0	0	18
0	0	0	12
0	0	0	26
0	0	0	6
0	3	0	7
0	0	0	16
0	0	2	28
0	0	2	4
0	0	0	0
0	0	0	0
0	0	7	0
0	0	6	0
0	0	0	0
113	0	0	2
0	0	3	0
0	0	0	0
0	0	8	3
0	0	0	1
0	0	0	0
5	0	0	4
0	0	0	14
0	0	0	16
0	0	0	0
0	0	0	0
3	0	0	0
8	0	0	0
0	0	0	0
0	0	0	10
0	0	0	0
0	0	0	9
0	0	0	3
0	0	0	0
0	0	0	0
0	0	0	4
0	0	0	3
0	0	0	0
0	0	0	0
0	0	0	0
0	0	0	0
0	0	0	4
0	0	0	5
0	0	0	2
0	0	0	0
0	0		1
0	0		2
0	0		0
0	0		0
0	0		0
0	11		0
0	0		0
5	0		0
0	3		0
0	0		0
0	0		0
0	0		0
0	10		0
0	0		0
22	0		0
0	0		0
0	0		0
4	0		0
0	0		0
0	0		0
0	0		0
0	0		0
0	0		0
0	0		0
0	0
0	0
0	0
0	0
0	0
0	0
0	0
0	0
0	0
0	0
0	0
0	0
0	0
0	0
0	0
0	0
0	0
0	0
0	0
0	0
0	0
0	0
0	0
0	0
0	0
0	3
0	1
0	0
0	0
0	0
0	0
0	0
0	7
0	0
0	0
0	0
0	0
0	0
0	0
0	0
0	0
0	1
0	0
0	0
0	0
0	0
0	0
0	0
0	0
0	0
0	0
0	7
0	0
0	8
0	0
0	0
0	0
0	0
0	0
0	0
0	0
0	0
0	0
0	0
0	0
0	0
0	0
0	0
0	3
0	0
0	0
0	0
0	0
0	0
0	2
0	1
0	0
0	0
0	0
0	0
0	0
0	0
0	0
0	0
0	0
0	0
0	0
0	0
0	0
0	0
0	0
0	0
0	0
0	3
0	0
0	0
0	0
0	0
0	0
0	0
0	0
0	0
0	0
0	0
0	0
0	0
0	0
0	0
0	0
0	0
0	0
0	0
0	0
0	0
0	0
0	0
0	0
0	0
0	0
0	0
0	0
0	0
0	0
0	0
0	0
0	0
0	0
0	0
0	3
0	0
0	0
0	0
0	0
0	0
0	0
0	0
0	0
0	0
0	0
0	0
0	0
0	0
0	0
0	0
0	0
0	0
0	0
0	0
0	0
0	4
0	0
0	0
0	0
0	0
0	0
0	0
0	0
0	0
0	0
0	0
0	0
0	0
0	0
0	0
0	7
0	0
0	0
0	0
0	0
0	0
0	0
0	0
0	0
6	0
0	0
0	0
0	0
0	0
0	0
0	0
0	0
0	0
0	0
0	0
0	0
0	0
0	0
0	0
0	0
0	0
0	0
0	0
0	0
0	0
0	0
0	0
0	0
0	0
0	0
0	0
0	0
0	0
3	0
0	0
0	0
0	0
0	0
0	0
0	0
0	0
0	0
6	0
2	0
0	0
2	0
4	0
0	0
0	0
0	0
0	0
0	0
3	0
5	0
0	0
6	0
0	0
10	0
0	0
0	0
1	0
0	0
0	0
0	0
2	0
0	0
0	0
0	0
0	0
0	0
0	0
0	7
3	0
0	1
0	0
6	4
0	0
3	0
3	0
	0
	8
	4
	0
	0
	3
	0
	0
	0
	3
	0
	0
	2
	3
	0
	0
	0
	7
	0
	0
	0
	0
	0
	0
	0
	0
	0
	0
	0
	0
	5
	0
	3
	0
	0
	0
	0
	0
	6
	0
	0
	8
	3
	0
	0
	0
	0
	0
	0
	0
	0
	0
	0
	0
	0
	0
	0
	0
	0
	0
	0
	0
	0
	0
	0
	0
	0
	0
	0
	0
	0
	0
	0
	0
	0
	0
	0
	0
	0
	0
	0
	0
	0
	0
	0
	0
	3
	0
	0
	3
	0
	1
	0
	0
	0
	0
	0
	3
	0
	0
	0
	0
	4
	0
	0
	0
	3
	0
	0
	0
	0
	0
	0
	0
	0
	0
	0
	5
	4
	2
	1
	0
	0
	7
	0
	0
	0
	0
	0
	0

## Sheet: Figure8 K' 
Kcl ctr 2.5 min	Kcl noc 2.5 min	Glu+Kcl ctr 2.5 min	Glu+Kcl noc 2.5 min										Statistical significance calculated using Kruskal-Wallis test of each condition compared to every other condition
0	3	2	0
0	2	0	8										Number of families	1
0	0	1	5										Number of comparisons per family	6
1	0	0	7			stdev	2.00657	1.89276	2.52376	3.12357			Alpha	0.05
0	4	5	5			mean	1.30796	1.18079	2.33987	3.01212
0	0	1	6			var coef	1.53412	1.60296	1.07859	1.037			Dunn's multiple comparisons test	Mean rank diff.	Significant?	Summary	Adjusted P Value
0	0	0	4										Kcl ctr 2.5 min vs. Kcl noc 2.5 min	33.86	No	ns	>0.9999	A-B
1	0	4	3										Kcl ctr 2.5 min vs. Glu+Kcl ctr 2.5 min	-252.4	Yes	****	<0.0001	A-C
0	0	0	4										Kcl ctr 2.5 min vs. Glu+Kcl noc 2.5 min	-363.4	Yes	****	<0.0001	A-D
0	1	5	6										Kcl noc 2.5 min vs. Glu+Kcl ctr 2.5 min	-286.2	Yes	****	<0.0001	B-C
1	4	0	2										Kcl noc 2.5 min vs. Glu+Kcl noc 2.5 min	-397.3	Yes	****	<0.0001	B-D
0	1	0	0										Glu+Kcl ctr 2.5 min vs. Glu+Kcl noc 2.5 min	-111.1	Yes	*	0.047	C-D
0	2	6	8
0	4	1	4										Test details	Mean rank 1	Mean rank 2	Mean rank diff.	n1	n2	Z
0	2	2	3										Kcl ctr 2.5 min vs. Kcl noc 2.5 min	872	838.1	33.86	578	709	1.148
0	4	4	4										Kcl ctr 2.5 min vs. Glu+Kcl ctr 2.5 min	872	1124	-252.4	578	306	6.784
0	4	0	0										Kcl ctr 2.5 min vs. Glu+Kcl noc 2.5 min	872	1235	-363.4	578	330	10.01
0	1	4	4										Kcl noc 2.5 min vs. Glu+Kcl ctr 2.5 min	838.1	1124	-286.2	709	306	7.953
0	0	5	10										Kcl noc 2.5 min vs. Glu+Kcl noc 2.5 min	838.1	1235	-397.3	709	330	11.33
0	5	6	5										Glu+Kcl ctr 2.5 min vs. Glu+Kcl noc 2.5 min	1124	1235	-111.1	306	330	2.659
1	7	0	8
1	5	4	2
0	3	1	1
0	0	2	2
0	2	3	0
1	3	4	4
2	3	0	1
2	4	6	0
0	3	2	4
0	6	3	6
0	0	2	2
0	0	0	2
0	3	1	0
0	0	4	1
0	5	5	0
0	1	11	1
0	7	4	13
1	1	2	5
0	0	3	3
0	5	3	4
0	0	4	7
0	4	0	2
0	9	7	0
0	0	5	4
0	4	16	2
0	0	6	3
0	0	5	3
0	0	1	3
0	0	8	2
0	5	4	10
0	0	2	6
2	0	4	0
0	0	1	5
1	1	1	10
0	0	3	2
0	0	6	2
2	0	2	2
0	2	0	2
0	4	7	3
0	0	5	1
0	0	6	1
1	1	4	4
0	6	1	1
0	4	0	4
0	3	0	2
0	5	0	5
0	2	1	0
0	3	0	1
0	3	0	4
0	1	0	5
0	1	3	5
0	0	3	3
0	2	4	0
0	2	5	2
0	1	3	2
0	2	3	2
3	1	1	4
0	2	3	6
0	8	2	1
1	1	2	8
1	4	1	2
0	2	0	6
1	1	6	2
0	0	7	4
0	0	3	0
0	0	4	0
0	0	4	3
0	0	0	2
0	0	3	4
1	1	0	6
0	0	2	7
0	0	2	1
1	0	5	2
1	3	0	1
0	0	5	4
0	2	1	3
0	0	3	4
0	0	2	12
4	0	1	2
4	0	2	5
0	2	0	4
10	0	4	2
4	1	3	6
8	0	1	1
0	2	2	5
6	1	0	1
8	0	3	7
1	0	2	5
1	1	1	0
7	2	1	1
2	3	3	5
1	3	2	12
1	0	1	1
0	0	6	4
5	0	5	1
1	0	0	0
0	0	1	3
0	0	0	2
9	0	1	3
4	2	1	0
9	1	0	4
4	0	6	0
9	0	8	9
3	0	0	2
9	0	1	1
7	0	1	0
4	0	0	4
2	4	3	0
5	5	4	3
3	5	2	0
0	2	0	2
4	0	4	1
3	0	4	1
2	4	0	1
1	2	2	4
4	4	0	3
7	0	5	5
2	1	7	2
4	0	5	6
7	1	1	5
3	0	1	3
2	1	2	0
4	0	0	2
7	1	5	1
5	2	0	8
3	0	0	2
3	0	1	4
1	0	0	6
9	0	0	1
4	0	1	3
2	0	2	1
0	1	3	4
6	2	1	0
1	3	8	0
2	3	1	3
4	1	5	0
3	0	0	0
1	0	3	0
3	2	3	0
0	3	6	7
1	2	1	5
2	0	3	1
1	2	2	0
2	0	1	3
1	0	4	13
4	0	8	0
0	1	0	4
2	0	0	7
2	0	0	4
4	0	1	1
0	0	0	17
2	0	3	5
5	0	4	13
3	7	4	4
1	0	3	10
0	2	2	14
2	8	2	8
5	0	4	1
0	0	3	0
2	5	0	1
0	3	2	17
0	0	7	10
5	0	5	9
0	2	3	2
1	0	0	9
6	1	0	0
3	4	0	0
1	4	4	4
0	2	2	12
0	0	4	5
2	2	4	2
4	2	3	8
5	5	8	1
3	0	4	1
2	0	5	7
0	5	4	4
0	1	4	3
0	0	1	1
1	0	4	4
5	3	2	1
2	1	2	0
3	0	1	1
2	1	1	5
5	4	4	3
2	6	1	0
0	3	0	1
5	6	3	5
0	0	0	0
0	1	0	0
0	0	7	2
0	6	9	0
2	2	1	8
1	0	2	0
0	2	0	4
3	0	0	0
0	1	0	1
1	0	5	2
3	0	1	0
0	0	3	1
0	0	0	1
2	0	1	0
0	0	3	3
2	1	3	2
7	0	2	0
2	0	0	5
0	0	0	4
0	0	0	5
0	0	1	3
1	0	0	3
1	1	0	1
0	0	2	8
2	0	4	3
0	0	0	0
1	0	1	5
3	0	0	2
0	0	3	2
0	0	0	1
1	0	4	0
0	0	0	2
2	0	2	3
3	0	0	2
0	0	0	1
1	1	0	2
3	0	0	0
1	0	1	0
4	0	4	3
0	0	0	2
0	0	0	0
3	0	0	3
0	0	2	8
3	0	5	0
1	0	2	0
0	0	2	4
0	2	4	6
0	0	8	4
1	0	0	4
1	1	0	0
0	0	12	0
0	0	8	0
0	0	6	0
1	0	8	4
0	0	6	2
0	0	7	6
0	0	3	6
0	0	6	6
0	0	0	4
0	0	1	6
0	1	3	1
0	1	3	3
0	0	3	1
0	0	1	0
0	0	1	0
0	0	0	1
0	0	0	0
0	0	8	0
0	0	0	0
2	0	3	1
1	0	6	0
0	1	8	5
2	0	1	5
3	0	0	0
0	1	0	10
2	0	0	2
2	0	0	9
6	0	0	6
2	1	0	1
1	2	0	5
4	0	0	0
2	0	0	2
1	0	0	0
0	1	0	10
2	0	0	0
0	2	0	5
0	1	0	5
0	4	0	0
0	1	0	1
3	2	0	1
1	0	0	0
3	0	0	4
4	0	0	0
0	0	0	0
0	0	0	0
0	0	0	9
0	0	0	2
1	0	0	2
0	0	0	6
0	0		1
0	4		2
3	1		2
3	6		1
0	1		0
3	1		2
1	0		2
1	5		0
2	7		0
2	1		0
0	0		0
0	1		2
0	5		2
0	1		2
4	0		1
0	2		0
1	2		0
1	3		0
0	0		0
0	0		0
0	0		0
0	0		1
0	0		1
0	0		1
0	0
0	0
0	0
0	0
0	0
0	0
0	0
0	0
6	0
1	0
2	0
5	0
0	0
0	0
0	0
0	0
0	0
0	0
3	0
2	0
0	0
0	0
0	0
2	0
0	0
0	1
0	2
0	0
0	1
1	0
0	0
0	1
2	0
0	0
0	0
0	0
0	1
1	0
0	4
2	0
0	0
0	0
1	1
1	0
10	1
8	0
0	0
3	0
1	1
1	0
0	1
3	3
0	0
0	0
1	0
1	1
0	0
0	0
0	1
0	0
1	2
4	2
3	3
1	0
0	1
5	0
3	0
0	0
2	0
0	0
0	0
0	0
0	0
0	1
0	2
0	0
1	1
0	0
0	1
0	0
0	0
1	0
0	0
1	0
1	0
1	0
6	0
0	1
0	0
0	0
0	0
0	2
0	2
0	5
1	2
0	3
1	0
0	0
1	0
1	0
0	0
0	0
0	0
9	0
3	0
1	1
0	0
2	3
0	10
0	1
0	2
0	2
0	1
5	0
0	0
2	2
0	4
1	4
1	1
2	0
0	1
2	2
2	3
6	0
2	0
0	3
0	3
0	4
0	5
0	2
0	0
3	1
0	0
0	0
1	1
2	1
0	0
2	0
0	0
1	2
1	0
0	0
0	0
1	0
0	0
1	0
1	0
2	0
0	0
6	4
4	2
1	0
0	0
0	0
0	0
0	1
2	0
5	0
0	1
1	2
4	2
0	0
1	0
0	3
1	0
0	0
1	0
0	0
0	0
0	0
0	0
0	0
0	0
6	0
2	1
4	0
2	3
0	0
0	0
0	0
1	3
0	0
0	0
1	0
3	0
1	1
0	2
0	0
0	0
2	0
3	0
0	0
0	0
0	0
0	0
0	3
1	1
1	1
0	0
0	1
0	1
1	1
2	2
0	0
0	0
1	0
0	1
0	0
0	0
0	0
0	0
8	0
2	3
1	2
3	1
11	0
0	0
0	0
0	1
1	0
0	1
0	3
4	0
2	1
2	0
2	1
4	0
2	0
3	0
1	0
2	0
3	1
3	0
1	0
2	1
0	1
0	2
1	7
0	1
3	1
0	12
3	0
1	3
4	6
0	0
1	1
6	0
10	0
	0
	2
	3
	3
	6
	4
	0
	2
	5
	3
	2
	2
	15
	3
	2
	3
	1
	6
	2
	2
	0
	1
	1
	0
	0
	7
	0
	0
	1
	0
	2
	0
	1
	0
	0
	1
	0
	0
	2
	8
	2
	7
	3
	0
	0
	3
	2
	0
	0
	0
	1
	0
	4
	2
	3
	0
	4
	0
	0
	1
	0
	3
	0
	9
	0
	0
	2
	0
	3
	0
	2
	0
	1
	2
	4
	0
	2
	0
	0
	0
	0
	0
	4
	0
	4
	0
	6
	3
	3
	0
	0
	1
	0
	0
	0
	0
	0
	1
	6
	2
	2
	0
	3
	0
	0
	0
	4
	6
	6
	0
	2
	1
	1
	0
	0
	2
	0
	1
	5
	4
	1
	10
	1
	4
	2
	1
	0
	1
	0
	0

[truncated: 2 more sheets: Figure8 L, Figure8 L' ]
