# Supplementary material for: Microtubules regulate pancreatic β-cell heterogeneity via spatiotemporal control of insulin secretion hot spots
Source: eLife journal article supplement (doi:10.7554/elife.59912), 2021-11-08
Supplement: supp [file elife-59912-supp-v2.zip]

A

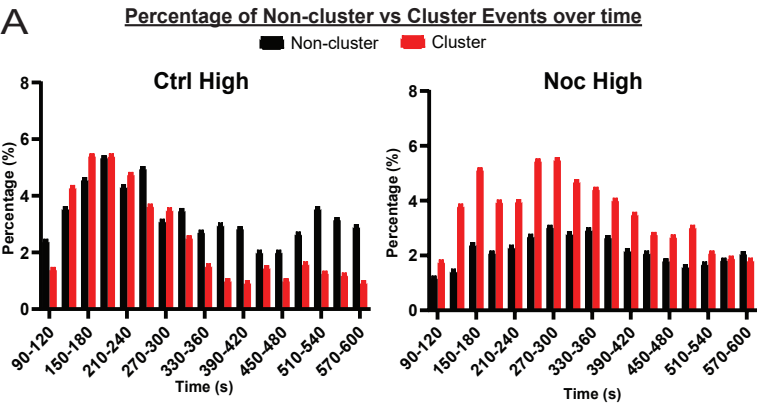

**Figure 6- figure supplement 1. Clustered secretion is mostly restricted to the first phase of secretion in control islets. Corresponds to Figure 5.**

A) Histogram of secretion events over time separated into secretion events not in clusters (black) and in clusters (red). Graphed as percentage of cells within each bin per condition. Time (seconds) since dye and either high (20 mM) or low (2.8 mM) glucose. Bin=30 seconds. N= 16-19 islets.
