# Supplementary material for: Microtubules regulate pancreatic β-cell heterogeneity via spatiotemporal control of insulin secretion hot spots
Source: eLife journal article supplement (doi:10.7554/elife.59912), 2021-11-08

**Figure 7 - Supplement Figure 1. Calcium influx over time in glucose-stimulated islets.**

A-B) Analysis of a representative experiment (one islet isolation) summarized in Figure 7D,E. Each curve represents Calbryte 520 intensity dynamics of a single  $\beta$  cell, 1 minute before and 1 minute after the fluctuations start. Each graph combines cells from one islet, either control DMSO- (A) or nocodazole-pretreated (B). Fold increase over mean intensity at the time of stimulation is shown. Time in min after stimulation is shown. Time, minutes.

**A****DMSO**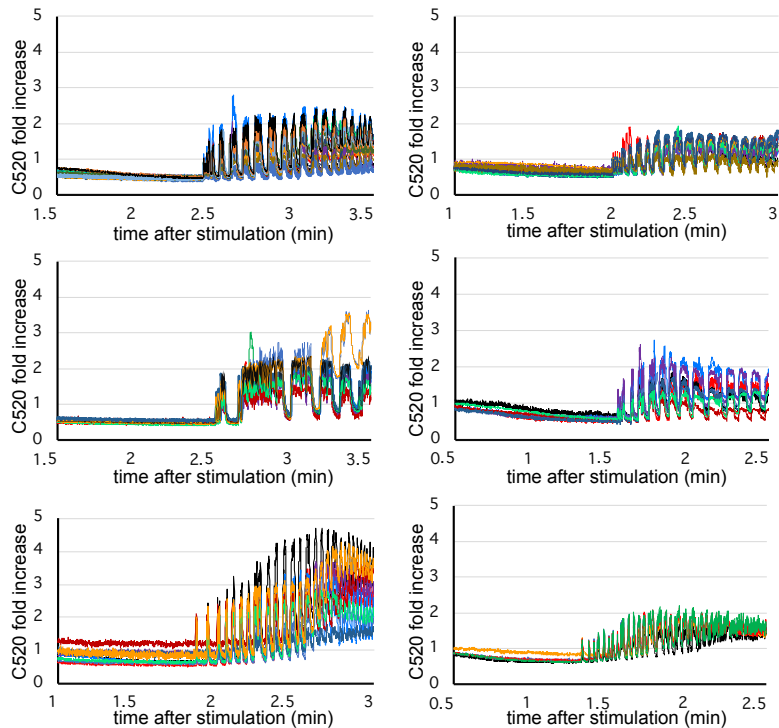**B****Noc**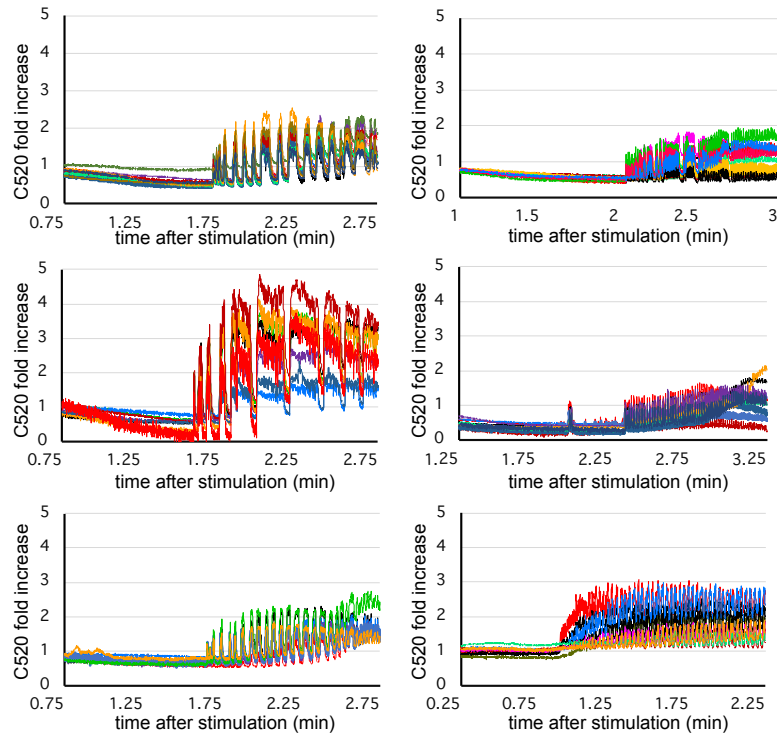

Supplement: supp [file elife-59912-supp-v2.zip]
