# Supplementary material for: Microtubules regulate pancreatic β-cell heterogeneity via spatiotemporal control of insulin secretion hot spots
Source: eLife journal article supplement (doi:10.7554/elife.59912), 2021-11-08
Supplement: supp [file elife-59912-supp-v2.zip]

## A Islet Preparation

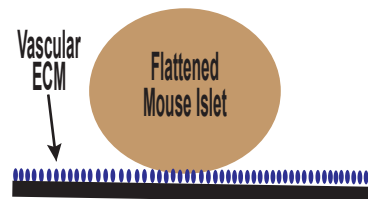

## Pre-dye imaging

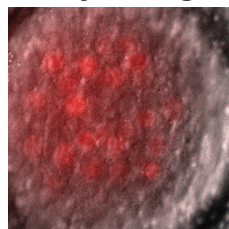

visualize cell borders  
determine b-cells

## TIRF Imaging

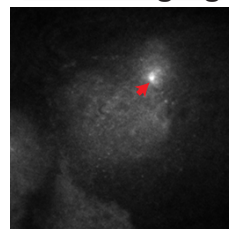

No delay, 60ms exposure  
10 minutes

## Image Processing

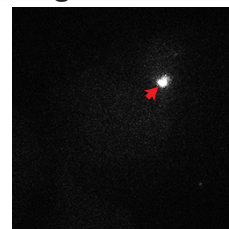

Remove first ~2.5 minutes  
Image subtraction  
Grouped t-projection

## Data Processing

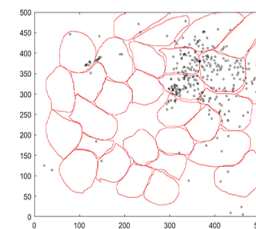

Identify secretion events  
Overlay with cell borders  
Matlab script to process data

## B **Ctrl Low**

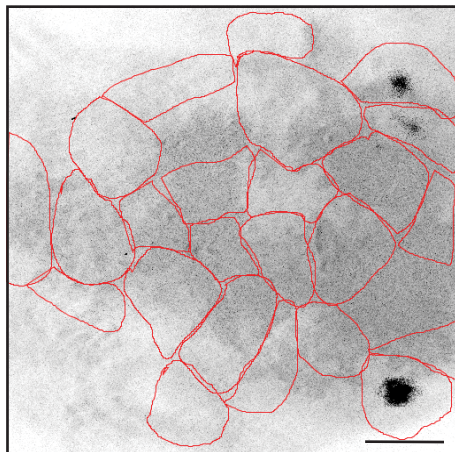

## C **Noc Low**

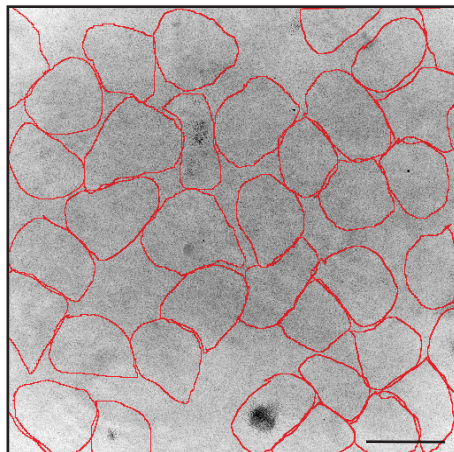

## D **Taxol Low**

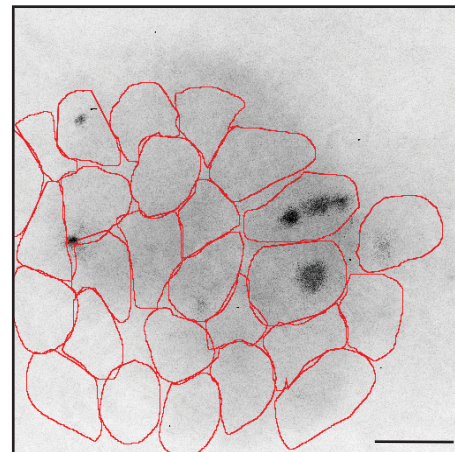

## **Ctrl**

## **Noc**

## **Taxol**

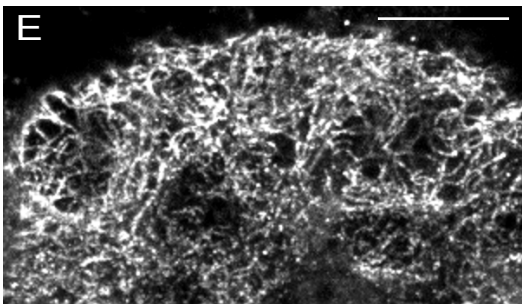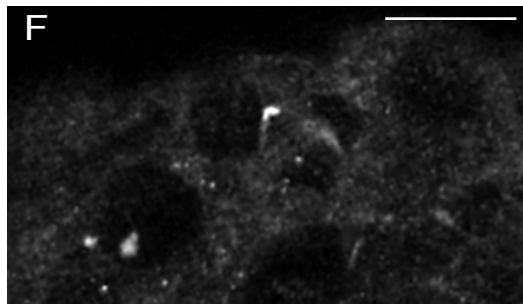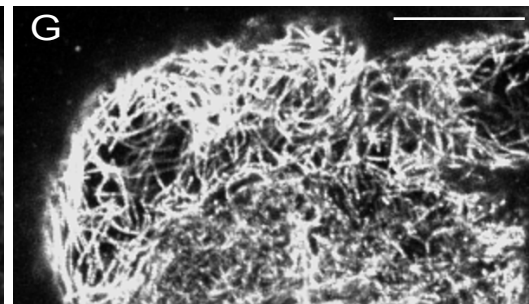

**Figure 2 - Supplemental Figure 1. Assay protocol and basal glucose conditions are not affected by MT stability.**

A) Overview of FluoZin-3 assays. For more information see materials and methods.

B-D) Time projections of islets from Supplemental Movies 4-6 inverted. FluoZin-3 flashes are represented as black areas. Cell borders overlaid in red. Islets were pre-incubated in DMSO (control, B), nocodazole (C) or taxol (D) and incubated in 2.8 mM glucose. Scale bars 100  $\mu\text{m}$ .

E-G) Representative images of tubulin following FluoZin-3 imaging as shown in A, islets were pre-incubated in DMSO (control, E), nocodazole (F) or taxol (G) and stimulated with 20 mM glucose. 3-image max projection of the bottom of the islet. Scale bars, 10  $\mu\text{m}$ .
