# Supplementary figures and images for: Microtubules regulate pancreatic β-cell heterogeneity via spatiotemporal control of insulin secretion hot spots
Source: eLife journal article supplement (doi:10.7554/elife.59912), 2021-11-08

# 95.0% Credible Interval

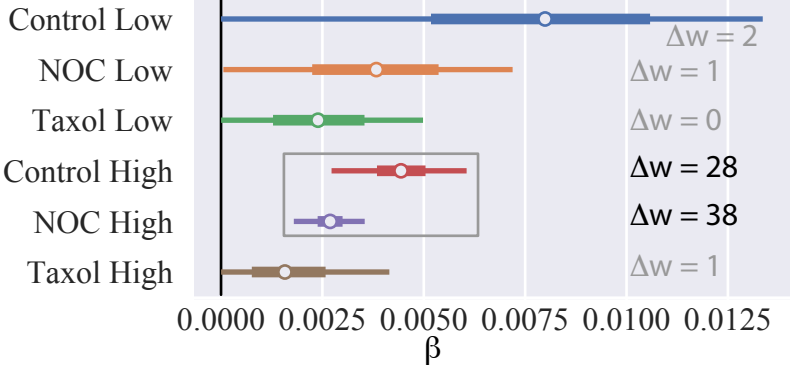

Supplement: supp [file elife-59912-supp-v2.zip]

KS P-value

$10^0$

$10^{-1}$

$10^{-2}$

3

4

5

6

7

8

9

10

Cluster Size

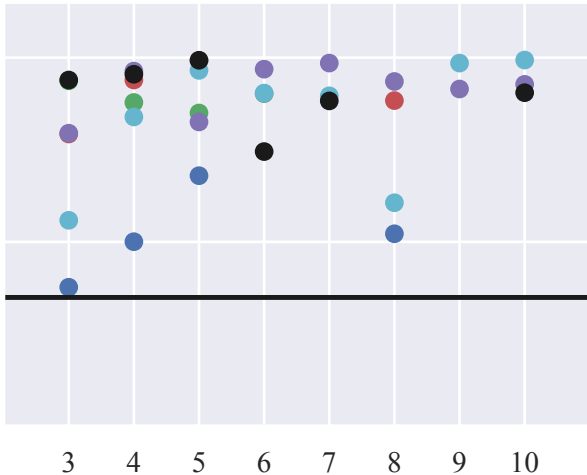

Supplement: supp [file elife-59912-supp-v2.zip]

ControlLow

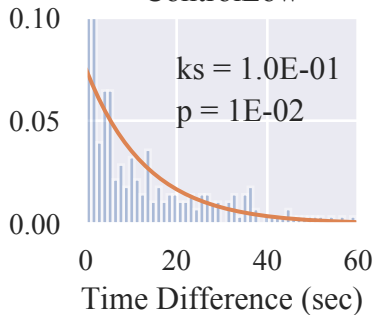

NOCLow

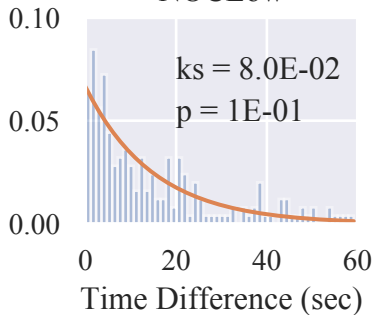

TaxolLow

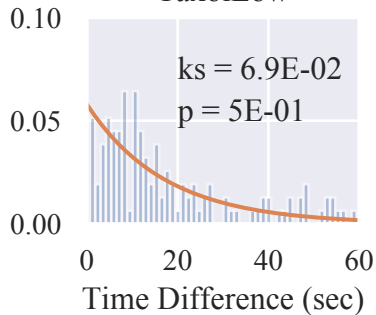

ControlHigh

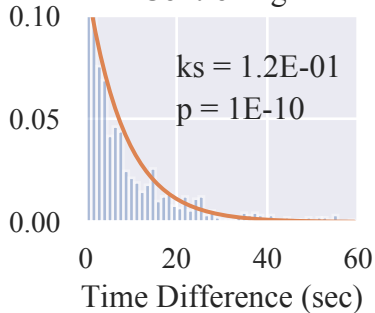

NOCHigh

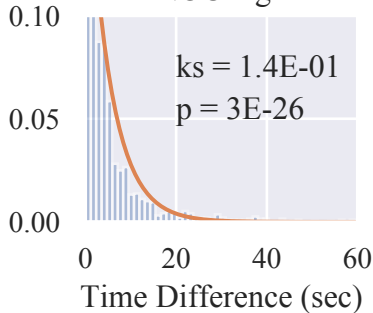

TaxolHigh

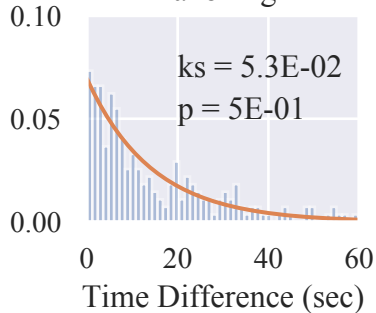

Supplement: supp [file elife-59912-supp-v2.zip]

ControlLow

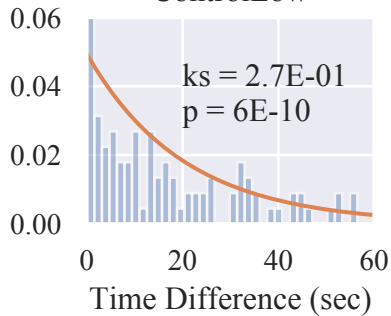

NOCLow

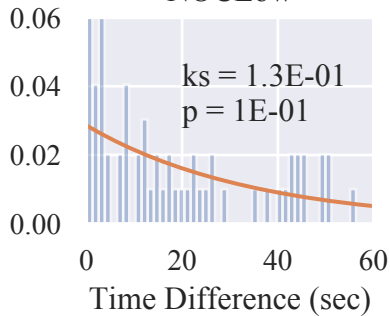

TaxolLow

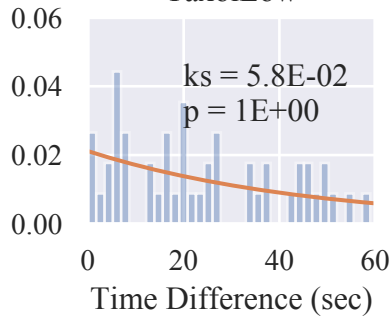

ControlHigh

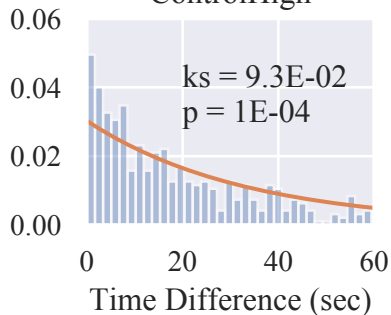

NOCHigh

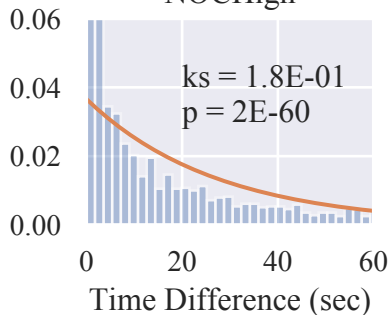

TaxolHigh

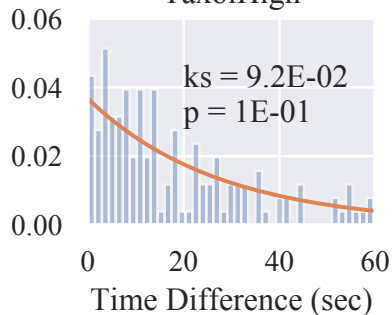

Supplement: supp [file elife-59912-supp-v2.zip]
